# Supplementary material
Source: PubMed Central journal article supplement (PMC2940470)
Supplement: me.2009-0513_1.pdf [file me.2009-0513_1.pdf]

Supplementary Information for:

## Foxa1 and Foxa2 maintain the metabolic and secretory features of mature $\beta$ -cell

Nan Gao<sup>1,2</sup>, John Le Lay<sup>1,2</sup>, Wei Qin<sup>2</sup>, Nicolai Doliba<sup>2</sup>, Jonathan Schug<sup>1,2</sup>, Alan J. Fox<sup>1,2</sup>, Olga Smirnova<sup>1,2</sup>, Franz M. Matschinsky<sup>2</sup>, Klaus H. Kaestner<sup>1,2,3</sup>

**Supplementary Figure 1.** Normal ChREBP expression level is maintained in *Foxa1*-deficient and *Foxa2*-deficient mouse islets.

**(A-C)** Control, *Foxa1*<sup>loxP/loxP</sup>;*Pdx1Cre* and *Foxa2*<sup>loxP/loxP</sup>;*Pdx1CreERT2* mouse pancreas were stained for ChREBP (red) and Insulin (green). Nuclei were counterstained by DAPI in blue.

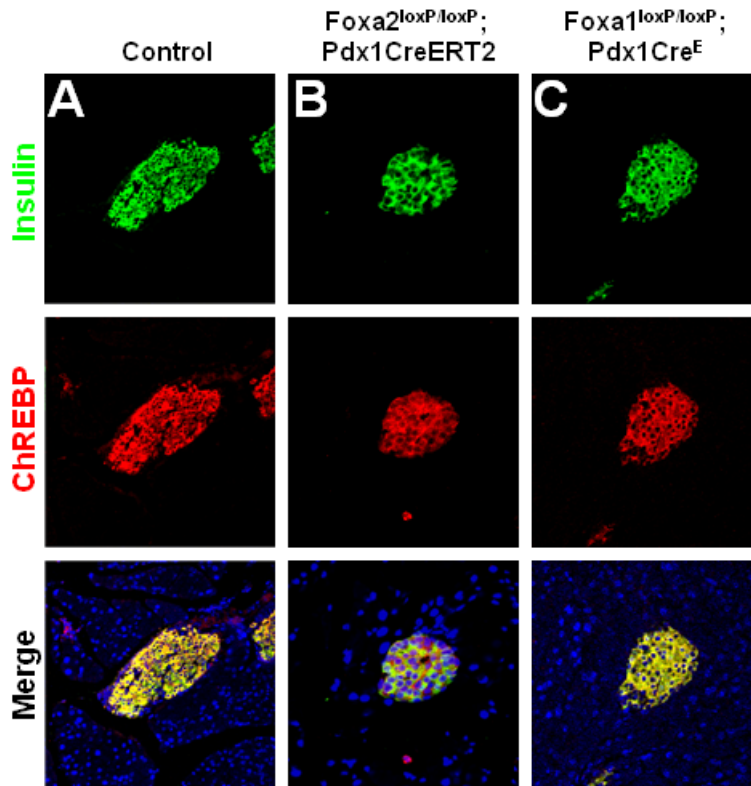

**Supplementary Figure 2.** Cytoplasmic ChREBP staining is found in wild type liver cells.

**(A-B)** Wild type liver sections were stained for ChREBP (green) and propidium iodide (red).

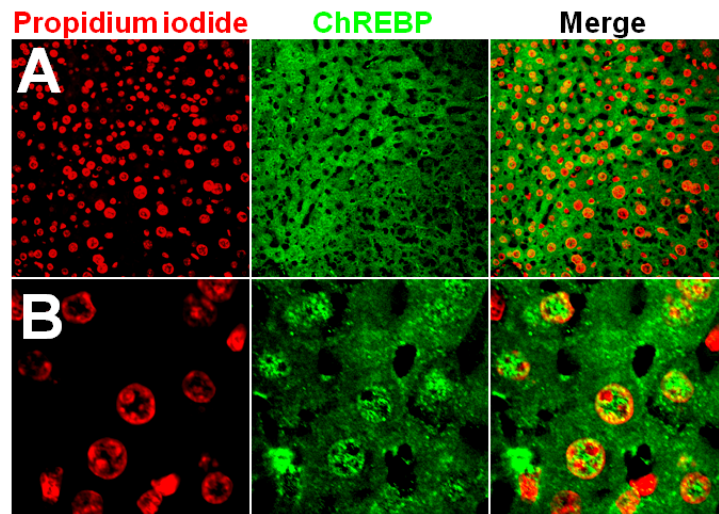

**Supplementary Figure 3.** ChREBP expression becomes enriched in differentiated endocrine cells.

**(A-B)** ChREBP (red) was co-stained with Pdx1 (blue), and Insulin (green in A) or Glucagon (green in B) in E12.5 pancreas.

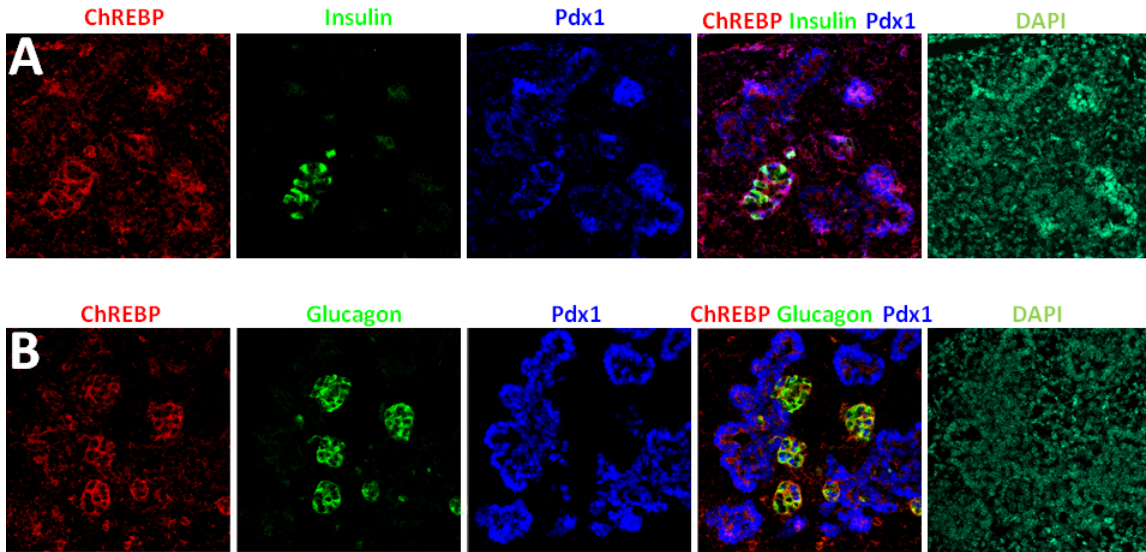

**Supplementary Table 1.** Microarray data sets joined from previous *Foxa2*<sup>loxP/loxP</sup>;*Pdx1CreERT2* study (Experiment #349) and current *Foxa1*<sup>loxP/loxP</sup>;*Foxa2*<sup>loxP/loxP</sup>;*Pdx1CreERT2* experiment (#536). Fold changes are highlighted in yellow and green for compound mutant islet and for *Foxa2*-deficient islet, respectively.

| GeneName      | ProbeName    | TranscriptID | Description                                | 536_FC | 536_FDR | 536_Pvalue | 536_Ranking | 536_Call | 349_FC       | 349_FDR | 349_Pvalue | 349_Ranking |
|---------------|--------------|--------------|--------------------------------------------|--------|---------|------------|-------------|----------|--------------|---------|------------|-------------|
|               |              |              | FOXA1 and FOXA2                            |        |         |            |             |          | FOXA2 only   |         |            |             |
| Penk1         | A_51_P102987 | NM_001002927 | preproenkephalin 1                         | 19.424 | 0       | 0.01967    | 138 M       |          | A_51_P102987 | 33.49   | 0.23748    | 5453        |
| Afm           | A_52_P425734 | NM_145146    | afamin                                     | 8.049  | 0.55    | 0.03041    | 183 P       |          | 1.042        | 30.75   | 0.56071    | 9114        |
| Lmo1          | A_52_P331762 | NM_057173    | LIM domain only 1                          | 7.869  | 0       | 0.00773    | 29 P        |          | -1.121       | 3.01    | 0.0383     | 1457        |
| Svil          | A_51_P344301 | AK021019     | supervillin                                | 6.789  | 0       | 0.01239    | 40 P        |          | -1.029       | 45.68   | 0.49548    | 8515        |
| 6330403K07Rik | A_51_P417251 | NM_134022    | RIKEN cDNA 6330403K07 gene                 | 6.714  | 4.65    | 0.11802    | 906 P       |          | 2.008        | 0       | 0.00841    | 310         |
| Enpp3         | A_51_P332917 | BC005527     | ectonucleotide pyrophosphatase/phospho     | 5.379  | 3.78    | 0.0868     | 613 P       |          | -1.042       | 44.4    | 0.49497    | 8513        |
| Sgk2          | A_51_P384230 | NM_013731    | serum/glucocorticoid regulated kinase 2    | 4.757  | 0       | 0.01385    | 59 P        |          | 1.147        | 3.46    | 0.02439    | 1005        |
| Dapp1         | A_52_P422172 | NM_011932    | dual adaptor for phosphotyrosine and 3-ph  | 4.647  | 0       | 0.0212     | 131 P       |          | 1.056        | 28.13   | 0.48193    | 8334        |
| Sez6          | A_52_P871    | AK032277     | seizure related gene 6                     | 3.801  |         | 0.2249     | 1455 A      |          | -1.007       | 49.48   | 0.89082    | 11974       |
| Sparcl1       | A_52_P64356  | NM_010097    | SPARC-like 1 (mast9, hev1n)                | 3.776  | 7.45    | 0.1716     | 1340 M      |          | 2.856        | 0       | 0.00627    | 156         |
| Nqo1          | A_51_P424338 | NM_008706    | NAD(P)H dehydrogenase, quinone 1           | 3.716  | 1.85    | 0.06906    | 431 M       |          | 1.183        | 3.01    | 0.0227     | 963         |
| Cpa4          | A_52_P158376 | NM_027926    | carboxypeptidase A4                        | 3.559  | 6.91    | 0.13833    | 1094 P      |          | 1.166        | 3.46    | 0.02307    | 974         |
| 3110001A13Rik | A_51_P521084 | NM_025626    | RIKEN cDNA 3110001A13 gene                 | 3.443  | 13.61   | 0.26351    | 3046 P      |          | 1.559        | 0       | 0.00584    | 42          |
| D1Ert471e     | A_51_P452533 | BC035277     | DNA segment, Chr 1, ERATO Doi 471, exp     | 3.396  | 6.57    | 0.13087    | 1030 P      |          | 1.577        | 0       | 0.00584    | 7           |
| Sox6          | A_52_P475356 | NM_011445    | SRY-box containing gene 6                  | 3.248  | 6.57    | 0.12793    | 1001 P      |          | 1.046        | 25.31   | 0.32591    | 6626        |
| Mmd           | A_51_P298991 | AK036131     | predicted gene, OTTMUSG0000001284          | 3.225  | 1.29    | 0.03457    | 207 P       |          | 1.31         | 1.17    | 0.01435    | 603         |
| Kntc1         | A_51_P408071 | NM_001042421 | kinetochore associated 1                   | 3.209  | 7.45    | 0.15022    | 1246 P      |          | 1.12         | 8.32    | 0.09755    | 3048        |
| Epb4.1l4a     | A_51_P513898 | NM_013512    | erythrocyte protein band 4.1-like 4a       | 3.146  | 6.57    | 0.1228     | 945 P       |          | 1.043        | 28.13   | 0.41666    | 7703        |
| 9030425E11Rik | A_51_P206144 | NM_133733    | RIKEN cDNA 9030425E11 gene                 | 3.09   | 6.91    | 0.1396     | 1117 P      |          | 1.025        | 40.63   | 0.80501    | 11220       |
| Vldlr         | A_51_P500044 | AK036010     | very low density lipoprotein receptor      | 3.05   | 0       | 0.01529    | 70 P        |          | 1.138        | 9.71    | 0.19896    | 4881        |
| Asb3          | A_52_P649786 | AK038897     | ankyrin repeat and SOCS box-containing p   | 3.039  | 28.61   | 0.41654    | 6932 P      |          | -1.003       | 49.48   | 0.98574    | 12935       |
| Slc39a8       | A_52_P485939 | NM_026228    | solute carrier family 39 (metal ion transp | 3.032  | 5.15    | 0.10304    | 782 P       |          | 2.181        | 0.35    | 0.04166    | 1576        |
| Pard6g        | A_51_P425657 | NM_053117    | par-6 partitioning defective 6 homolog ga  | 3.018  | 0.55    | 0.02209    | 133 P       |          | 1.012        | 42.43   | 0.88003    | 11858       |
| Igsf4a        | A_52_P116204 | NM_001025600 | cell adhesion molecule 1                   | 2.994  | 2.87    | 0.06417    | 391 P       |          | 1.66         | 0       | 0.00584    | 22          |
| Oat           | A_51_P141535 | NM_016978    | ornithine aminotransferase                 | 2.939  | 2.4     | 0.06148    | 366 P       |          | -1.142       | 2.53    | 0.03076    | 1215        |
| Nnat          | A_52_P484956 | NM_010923    | neuronatin                                 | 2.918  | 5.86    | 0.10991    | 844 P       |          | -1.061       | 36.07   | 0.26774    | 5910        |
| 1190002N15Rik | A_52_P394291 | NM_001033145 | RIKEN cDNA 1190002N15 gene                 | 2.896  | 0       | 0.01766    | 110 P       |          | 1.444        | 0.24    | 0.00584    | 32          |
| Capn6         | A_52_P474089 | NM_007603    | calpain 6                                  | 2.883  | 4.11    | 0.0868     | 615 P       |          | 1.1          | 9.71    | 0.10367    | 3181        |
| Fdps          | A_52_P593965 | AK077979     | farnesyl diphosphate synthetase            | 2.858  | 10.33   | 0.19826    | 1929 P      |          | -1.03        | 45.68   | 0.50559    | 8642        |
| Moxd1         | A_51_P493987 | NM_021509    | monooxygenase, DBH-like 1                  | 2.753  | 1.85    | 0.05412    | 321 P       |          | 1.063        | 25.31   | 0.42886    | 7813        |
| Col6a3        | A_52_P479262 | XM_897036    | procollagen, type VI, alpha 3              | 2.7    | 10.33   | 0.1849     | 1700 P      |          | 1.119        | 13.58   | 0.26039    | 5822        |
| Gast          | A_52_P236233 | NM_010257    | gastrin                                    | 2.689  | 4.65    | 0.0868     | 614 P       |          | 1.112        | 8.32    | 0.07325    | 2483        |
| Zfp185        | A_52_P384264 | NM_009549    | zinc finger protein 185                    | 2.607  | 1.85    | 0.04796    | 287 P       |          | 1.11         | 9.71    | 0.1388     | 3815        |
| Slc38a5       | A_51_P400269 | NM_172479    | solute carrier family 38, member 5         | 2.572  | 3.78    | 0.07004    | 458 P       |          | 1.386        | 1.58    | 0.03268    | 1286        |
| Dlk1          | A_51_P135618 | L12721       | delta-like 1 homolog (Drosophila)          | 2.554  | 12.21   | 0.23102    | 2399 P      |          | -1.155       | 2.04    | 0.03017    | 1204        |
| Dach2         | A_51_P126167 | NM_033605    | dachshund 2 (Drosophila)                   | 2.515  | 0.77    | 0.02553    | 151 P       |          | 2.145        | 0       | 0.00584    | 16          |
| Mrc1          | A_51_P439248 | NM_008625    | mannose receptor, C type 1                 | 2.471  | 1.29    | 0.03399    | 202 P       |          | 1.083        | 11.33   | 0.12478    | 3596        |
| Chgb          | A_52_P652560 | AK044172     | chromogranin B                             | 2.388  | 3.78    | 0.06683    | 421 P       |          | 2.603        | 0       | 0.00367    | 1           |
| Adamts2       | A_51_P164817 | AK029026     | a disintegrin-like and metallopeptidase (n | 2.377  | 10.84   | 0.19103    | 1820 P      |          | -1.003       | 49.48   | 0.96986    | 12743       |
| Degs1         | A_51_P498890 | NM_007853    | degenerative spermatocyte homolog 1 (D     | 2.366  | 1.29    | 0.06234    | 364 M       |          | 1.264        | 3.01    | 0.04735    | 1771        |
| Pax1          | A_51_P145322 | NM_008780    | paired box gene 1                          | 2.359  |         | 0.33699    | 2645 A      |          | 1.019        | 40.63   | 0.74976    | 10785       |
| Fbp1          | A_51_P474701 | NM_019395    | fructose bisphosphatase 1                  | 2.354  | 3.82    | 0.06906    | 446 P       |          | -1.27        | 0.66    | 0.01346    | 619         |
| Dcamkl1       | A_52_P563818 | NM_019978    | doublecortin-like kinase 1                 | 2.338  | 8.15    | 0.15615    | 1298 P      |          | -1.005       | 49.48   | 0.91531    | 12221       |
| Fbln1         | A_51_P154417 | NM_010180    | fibulin 1                                  | 2.338  | 25.79   | 0.3647     | 5490 P      |          | 1            | 49.48   | 0.99613    | 13025       |
| Pdgfra        | A_51_P345649 | NM_011058    | platelet derived growth factor receptor, a | 2.334  | 16.01   | 0.24565    | 2724 P      |          | 1.019        | 40.63   | 0.76472    | 10891       |
| Ttyh1         | A_51_P428384 | NM_021324    | tweety homolog 1 (Drosophila)              | 2.33   | 0.77    | 0.02663    | 158 P       |          | 1.093        | 19.02   | 0.3867     | 7357        |
| Dhh           | A_52_P232637 | NM_007857    | desert hedgehog                            | 2.322  | 6.91    | 0.12332    | 960 P       |          | 1.009        | 42.43   | 0.83579    | 11495       |
| Scd2          | A_51_P129464 | NM_009128    | stearoyl-Coenzyme A desaturase 2           | 2.319  | 3.78    | 0.09507    | 648 M       |          | 1.462        | 1.32    | 0.03814    | 1444        |
| Asb4          | A_52_P594756 | NM_023048    | ankyrin repeat and SOCS box-containing p   | 2.304  | 8.15    | 0.14404    | 1182 P      |          | 1.17         | 5.75    | 0.09575    | 3009        |
| Cdh11         | A_52_P437795 | NM_009866    | cadherin 11                                | 2.299  | 13.61   | 0.24363    | 2650 P      |          | -1.019       | 49.39   | 0.73433    | 10621       |
| Sdc2          | A_51_P157255 | NM_008304    | syndecan 2                                 | 2.299  | 1.85    | 0.0442     | 266 P       |          | 1.223        | 11.33   | 0.37912    | 7270        |

|               |              |              |                                             |       |       |         |         |        |       |         |       |
|---------------|--------------|--------------|---------------------------------------------|-------|-------|---------|---------|--------|-------|---------|-------|
| Asph          | A_52_P625171 | NM_133723    | aspartate-beta-hydroxylase                  | 2.298 | 9.39  | 0.16264 | 1390 P  | 1.186  | 3.46  | 0.03137 | 1238  |
| Dpt           | A_51_P116651 | NM_019759    | dermatopontin                               | 2.28  | 10.33 | 0.17663 | 1590 P  | 1.272  | 5.75  | 0.15965 | 4213  |
| Rasgrp1       | A_52_P487303 | NM_011246    | RAS guanyl releasing protein 1              | 2.278 | 28.61 | 0.37646 | 5792 P  | 1.758  | 0     | 0.00584 | 10    |
| E030049G20Rik | A_51_P379478 | NM_172484    | RIKEN cDNA E030049G20 gene                  | 2.256 | 18.5  | 0.27048 | 3159 P  | 1.078  | 16.2  | 0.26671 | 5896  |
| Dpep1         | A_51_P227345 | NM_007876    | dipeptidase 1 (renal)                       | 2.244 | 12.21 | 0.22227 | 2237 P  | -1.055 | 43.15 | 0.50642 | 8649  |
| Col1a1        | A_52_P525107 | NM_007742    | procollagen, type I, alpha 1                | 2.24  | 25.79 | 0.34902 | 5082 P  | 1.09   | 13.58 | 0.164   | 4282  |
| Dlgh1         | A_52_P499541 | XM_924111    | discs, large homolog 1 (Drosophila)         | 2.231 | 1.58  | 0.041   | 250 P   | 1.061  | 19.02 | 0.25085 | 5658  |
| Snca          | A_51_P509643 | NM_001042451 | synuclein, alpha                            | 2.228 | 23.47 | 0.32119 | 4400 P  | 1.015  | 42.43 | 0.92817 | 12373 |
| Flrt3         | A_52_P476935 | NM_178382    | fibronectin leucine rich transmembrane p    | 2.209 | 28.61 | 0.3844  | 6017 P  | 1      | 42.43 | 0.99989 | 10872 |
| Rerg          | A_51_P305508 | NM_181988    | RAS-like, estrogen-regulated, growth-inhi   | 2.207 | 18.5  | 0.2729  | 3261 P  | 1.108  | 19.02 | 0.45812 | 8078  |
| Camta1        | A_52_P617512 | XM_355539    | calmodulin binding transcription activator  | 2.201 | 7.45  | 0.12319 | 954 P   | 1.066  | 16.2  | 0.20664 | 5002  |
| 2810055G20Rik | A_52_P502332 | AK033222     | RIKEN cDNA 2810055G20 gene                  | 2.199 | 5.86  | 0.09225 | 682 P   | -1.153 | 3.01  | 0.03997 | 1526  |
| Rasl11b       | A_51_P293938 | NM_026878    | RAS-like, family 11, member B               | 2.193 | 9.39  | 0.15198 | 1257 P  | -1.006 | 49.48 | 0.9162  | 12230 |
| Fzd7          | A_52_P552665 | NM_008057    | frizzled homolog 7 (Drosophila)             | 2.184 | 1.21  | 0.02965 | 179 P   | 1.401  | 1.62  | 0.04505 | 1675  |
| Angptl6       | A_52_P319199 | NM_145154    | angiopoietin-like 6                         | 2.154 | 4.11  | 0.07147 | 474 P   | -1.073 | 30.75 | 0.23652 | 5443  |
| Gfra3         | A_51_P520426 | NM_010280    | glial cell line derived neurotrophic factor | 2.141 | 8.15  | 0.1373  | 1085 P  | -1.165 | 1.62  | 0.02979 | 1187  |
| Aldob         | A_51_P337269 | NM_144903    | aldolase 2, B isoform                       | 2.127 | 49.93 | 0.59973 | 13428 P | 1.058  | 19.02 | 0.23823 | 5461  |
| Ppp2r2b       | A_51_P220278 | NM_028392    | protein phosphatase 2 (formerly 2A), regu   | 2.12  | 1.85  | 0.04543 | 273 P   | 1.033  | 30.75 | 0.49807 | 8560  |
| Mmp7          | A_51_P426096 | NM_010810    | matrix metalloproteinase 7                  | 2.103 | 69.29 | 0.83609 | 19007 M | -1.035 | 45.05 | 0.50522 | 8629  |
| Clybl         | A_52_P88818  | NM_029556    | citrate lyase beta like                     | 2.096 | 1.29  | 0.03523 | 219 P   | 1.083  | 16.2  | 0.21313 | 5086  |
| Odz4          | A_52_P144368 | AK147579     | odd Oz/ten-m homolog 4 (Drosophila)         | 2.093 | 3.78  | 0.06649 | 413 P   | 1.073  | 13.58 | 0.1702  | 4387  |
| Cacna1g       | A_51_P466910 | NM_009783    | calcium channel, voltage-dependent, T ty    | 2.09  | 20.94 | 0.28406 | 3514 P  | 1.189  | 3.01  | 0.02193 | 928   |
| H6pd          | A_52_P83549  | NM_173371    | hexose-6-phosphate dehydrogenase (gluc      | 2.086 | 12.21 | 0.2021  | 1971 P  | -1.027 | 47.43 | 0.62692 | 9690  |
| Postn         | A_51_P489192 | NM_015784    | periostin, osteoblast specific factor       | 2.086 | 18.5  | 0.2659  | 3079 P  | -1.099 | 16.2  | 0.14477 | 3940  |
| Comt          | A_51_P129895 | NM_007744    | catechol-O-methyltransferase                | 2.082 | 4.11  | 0.07471 | 517 P   | 1.053  | 30.75 | 0.59745 | 9428  |
| Olfm1         | A_51_P137236 | NM_019498    | olfactomedin 1                              | 2.078 | 20.94 | 0.30385 | 3964 P  | 1.202  | 3.46  | 0.03912 | 1480  |
| 2310028N02Rik | A_51_P251552 | NM_025864    | RIKEN cDNA 2310028N02 gene                  | 2.066 | 1.85  | 0.09095 | 601 M   | -1.117 | 11.33 | 0.14431 | 3928  |
| Aldh1l2       | A_52_P498193 | NM_153543    | aldehyde dehydrogenase 1 family, memb       | 2.064 | 1.58  | 0.04513 | 269 P   | 1.061  | 25.31 | 0.41732 | 7712  |
| Auts2         | A_51_P398191 | AK147478     | autism susceptibility candidate 2           | 2.062 | 9.39  | 0.15792 | 1320 P  | 1.147  | 16.2  | 0.4504  | 7997  |
| Gap43         | A_51_P290065 | NM_008083    | growth associated protein 43                | 2.062 | 23.47 | 0.32211 | 4423 P  | 1.896  | 0.24  | 0.01703 | 737   |
| Rcor2         | A_51_P306689 | NM_054048    | REST corepressor 2                          | 2.056 | 4.11  | 0.07465 | 502 P   | 1.075  | 16.2  | 0.23701 | 5448  |
| Mpp6          | A_51_P265327 | NM_019939    | membrane protein, palmitoylated 6 (MAC      | 2.046 | 1.29  | 0.03882 | 237 P   | -1.122 | 9.71  | 0.10651 | 3213  |
| Uchl1         | A_52_P24308  | NM_011670    | ubiquitin carboxy-terminal hydrolase L1     | 2.029 | 35.45 | 0.45533 | 8063 P  | 1.04   | 36.07 | 0.7143  | 10440 |
| Gnas          | A_51_P326769 | AK047990     | GNAS (guanine nucleotide binding protei     | 2.028 | 31.88 | 0.41042 | 6749 P  | 1.184  | 8.32  | 0.18428 | 4644  |
| Dars          | A_52_P596635 | AK077820     | aspartyl-tRNA synthetase                    | 2.023 | 28.61 | 0.38302 | 5996 P  | 1.12   | 11.33 | 0.178   | 4536  |
| Prodh2        | A_51_P457446 | NM_019546    | proline dehydrogenase (oxidase) 2           | 2.017 | 10.84 | 0.1849  | 1708 P  | 1.102  | 9.71  | 0.08423 | 2755  |
| Enpp2         | A_51_P401974 | NM_015744    | ectonucleotide pyrophosphatase/phosph       | 2.005 | 5.86  | 0.13644 | 981 M   | -1.105 | 6.98  | 0.06646 | 2330  |
| Sim1          | A_51_P239994 | NM_011376    | single-minded homolog 1 (Drosophila)        | 1.994 | 16.01 | 0.24235 | 2582 P  | 1.061  | 16.2  | 0.1817  | 4608  |
| Fkbp1a        | A_52_P416810 | AK085599     | FK506 binding protein 1a                    | 1.992 | 10.84 | 0.1769  | 1603 P  | -1.075 | 33.49 | 0.31065 | 6459  |
| Crim1         | A_52_P46447  | AK053197     | cysteine rich transmembrane BMP regula      | 1.979 | 12.21 | 0.19826 | 1928 P  | 1.145  | 13.58 | 0.36528 | 7103  |
| Pitrm1        | A_51_P474960 | NM_145131    | pitrilysin metallepetidase 1                | 1.972 | 1.21  | 0.03678 | 230 P   | 1.153  | 4.63  | 0.03971 | 1519  |
| Rps6ka5       | A_51_P255945 | NM_153587    | ribosomal protein S6 kinase, polypeptide    | 1.971 | 6.91  | 0.10809 | 824 P   | 1.313  | 1.17  | 0.01251 | 504   |
| Lpl           | A_51_P259296 | NM_008509    | lipoprotein lipase                          | 1.97  | 1.85  | 0.09561 | 651 M   | 1.295  | 2.53  | 0.04414 | 1651  |
| Lmo3          | A_51_P118188 | NM_207222    | LIM domain only 3                           | 1.965 | 20.94 | 0.28781 | 3571 P  | 1.082  | 11.33 | 0.10441 | 3195  |
| Acpp          | A_52_P119060 | NM_207668    | acid phosphatase, prostate                  | 1.964 | 53.87 | 0.62723 | 12682 M | -1.012 | 49.48 | 0.85722 | 11650 |
| Tubb6         | A_51_P421140 | NM_026473    | tubulin, beta 6                             | 1.958 | 20.94 | 0.28377 | 3507 P  | -1.086 | 33.49 | 0.38457 | 7333  |
| 2210408F21Rik | A_52_P307142 | XM_895387    | RIKEN cDNA 2210408F21 gene                  | 1.956 | 6.57  | 0.09988 | 751 P   | 1.358  | 0.92  | 0.01251 | 523   |
| Pfkip         | A_52_P572045 | NM_019703    | phosphofructokinase, platelet               | 1.945 | 1.29  | 0.0419  | 255 P   | 1.015  | 42.43 | 0.85145 | 11603 |
| Tle4          | A_51_P346543 | NM_011600    | transducin-like enhancer of split 4, homol  | 1.943 | 4.65  | 0.1373  | 1011 M  | 1.44   | 0.24  | 0.00637 | 172   |
| Gyk           | A_52_P120066 | NM_212444    | glycerol kinase                             | 1.94  | 23.47 | 0.30455 | 4015 P  | 1.008  | 42.43 | 0.86714 | 11733 |
| Flna          | A_52_P582722 | XM_920628    | filamin, alpha                              | 1.937 |       | 0.40486 | 4448 A  | 1.045  | 28.13 | 0.48793 | 8422  |
| Aak1          | A_51_P284686 | NM_001040106 | AP2 associated kinase 1                     | 1.931 | 6.91  | 0.1085  | 833 P   | 1.239  | 2.04  | 0.01927 | 810   |
| Tbc1d1        | A_51_P293516 | NM_019636    | TBC1 domain family, member 1                | 1.928 | 1.29  | 0.04173 | 252 P   | 1.369  | 0.66  | 0.00977 | 361   |

|               |               |           |                                             |       |       |         |         |        |       |         |       |
|---------------|---------------|-----------|---------------------------------------------|-------|-------|---------|---------|--------|-------|---------|-------|
| E2f1          | A_52_P587611  | NM_007891 | E2F transcription factor 1                  | 1.926 | 16.01 | 0.23499 | 2442 P  | 1.112  | 6.98  | 0.05792 | 2083  |
| 2010004A03Rik | A_51_P268234  | NM_029646 | RIKEN cDNA 2010004A03 gene                  | 1.921 | 20.94 | 0.27386 | 3292 P  | -1.191 | 1.32  | 0.02595 | 1073  |
| Hmox1         | A_51_P263965  | NM_010442 | heme oxygenase (decycling) 1                | 1.92  | 16.01 | 0.23607 | 2464 P  | 1.093  | 19.02 | 0.41142 | 7618  |
| Cbfb          | A_52_P586157  | NM_022309 | core binding factor beta                    | 1.915 | 10.33 | 0.16388 | 1415 P  | 1.097  | 13.58 | 0.23277 | 5394  |
| Trib3         | A_51_P331570  | NM_175093 | tribbles homolog 3 (Drosophila)             | 1.912 | 20.94 | 0.26884 | 3131 P  | 1.11   | 8.32  | 0.07692 | 2572  |
| Gpd1          | A_52_P16419   | NM_010271 | glycerol-3-phosphate dehydrogenase 1 (s     | 1.911 | 10.33 | 0.15824 | 1330 P  | 1      | 49.48 | 0.99923 | 13048 |
| Dcn           | A_51_P334104  | NM_007833 | decorin                                     | 1.909 | 18.5  | 0.25347 | 2858 P  | 1.04   | 30.75 | 0.51989 | 8753  |
| Ptger4        | A_52_P223473  | AK051137  | prostaglandin E receptor 4 (subtype EP4)    | 1.909 |       | 0.43053 | 4076 A  | -1.019 | 49.48 | 0.904   | 12131 |
| 1500032D16Rik | A_52_P170054  | NM_030087 | RIKEN cDNA 1500032D16 gene                  | 1.908 | 2.87  | 0.10961 | 776 M   | 1.166  | 6.98  | 0.11145 | 3310  |
| Scp2          | A_52_P1084657 | AK087232  |                                             | 1.906 |       | 0.26762 | 2101 A  | 1.106  | 19.02 | 0.43821 | 7904  |
| Cryz          | A_51_P435198  | NM_009968 | crystallin, zeta                            | 1.9   | 5.86  | 0.09133 | 652 P   | 1.28   | 1.62  | 0.02145 | 902   |
| Epha7         | A_52_P306236  | AK033903  | Eph receptor A7                             | 1.898 | 10.33 | 0.16749 | 1461 P  | 1.065  | 25.31 | 0.47406 | 8234  |
| Phyhlpl       | A_52_P661327  | NM_178621 | phytanoyl-CoA hydroxylase interacting pr    | 1.895 | 6.91  | 0.10304 | 793 P   | 1.011  | 42.43 | 0.82193 | 11378 |
| Ssbp2         | A_52_P522977  | NM_024272 | single-stranded DNA binding protein 2       | 1.882 | 2.87  | 0.06278 | 384 P   | -1.055 | 42.43 | 0.40226 | 7538  |
| Gdnf          | A_51_P147777  | NM_010275 | glial cell line derived neurotrophic factor | 1.881 |       | 0.43918 | 4220 A  | 1.031  | 33.49 | 0.57453 | 9223  |
| Rps6ka6       | A_52_P507665  | NM_025949 | ribosomal protein S6 kinase polypeptide t   | 1.881 | 4.65  | 0.08003 | 558 P   | -1.051 | 45.05 | 0.64944 | 9878  |
| Fgd2          | A_52_P260994  | NM_013710 | FYVE, RhoGEF and PH domain containing       | 1.876 | 1.85  | 0.05518 | 341 P   | 1.076  | 16.2  | 0.2431  | 5545  |
| Acad9         | A_52_P73208   | AK049931  | acyl-Coenzyme A dehydrogenase family, r     | 1.871 | 6.91  | 0.10722 | 819 P   | -1.171 | 2.53  | 0.04872 | 1817  |
| 3321401G04Rik | A_52_P250578  | AK132148  | RIKEN cDNA 3321401G04 gene                  | 1.867 | 2.87  | 0.06484 | 401 P   | 1.003  | 42.43 | 0.95758 | 12640 |
| Ogfr1         | A_52_P175342  | XM_129809 | opioid growth factor receptor-like 1        | 1.86  | 5.86  | 0.0915  | 662 P   | -1.089 | 22.1  | 0.18583 | 4664  |
| Galnt10       | A_52_P1028560 | AK082774  | UDP-N-acetyl-alpha-D-galactosamine:pol      | 1.856 | 49.93 | 0.37281 | 4067 M  | -1.154 | 1.62  | 0.02757 | 1117  |
| Lamp2         | A_52_P636724  | AK078193  | lysosomal-associated membrane protein 1     | 1.851 | 16.01 | 0.23388 | 2421 P  | 1.165  | 3.01  | 0.01933 | 814   |
| Adamts5       | A_52_P70231   | AK046558  | a disintegrin-like and metalloproteinase (r | 1.846 | 8.15  | 0.13482 | 1066 M  | 1.001  | 42.43 | 0.99046 | 12989 |
| Tnfrsf10b     | A_52_P10134   | NM_020275 | tumor necrosis factor receptor superfam     | 1.843 | 38.68 | 0.39052 | 5372 M  | -1.1   | 11.33 | 0.10311 | 3174  |
| Hebp1         | A_51_P376347  | NM_013546 | heme binding protein 1                      | 1.839 | 23.47 | 0.29034 | 3624 P  | 1.083  | 16.2  | 0.22626 | 5289  |
| Esr1          | A_51_P474658  | NM_007956 | estrogen receptor 1 (alpha)                 | 1.838 | 10.84 | 0.25357 | 2029 M  | 1.019  | 38.4  | 0.70466 | 10356 |
| Sox5          | A_51_P500318  | NM_011444 | SRY-box containing gene 5                   | 1.838 |       | 0.45319 | 4451 A  | 1.007  | 42.43 | 0.94576 | 12548 |
| Rab3il1       | A_51_P451759  | BC020147  | RAB3A interacting protein (rab3in3)-like 1  | 1.837 | 7.45  | 0.11112 | 853 P   | 1.19   | 2.53  | 0.01648 | 706   |
| D230012E17Rik | A_52_P222981  | AK033485  | RIKEN cDNA D230012E17 gene                  | 1.836 | 10.33 | 0.16042 | 1344 P  | -1.123 | 13.58 | 0.16913 | 4371  |
| Col3a1        | A_51_P515605  | NM_009930 | procollagen, type III, alpha 1              | 1.835 | 13.61 | 0.21221 | 2092 P  | 1.244  | 2.53  | 0.03416 | 1314  |
| Ing4          | A_52_P647226  | AK046126  | inhibitor of growth family, member 4        | 1.832 | 20.94 | 0.27429 | 3294 P  | 1.041  | 28.13 | 0.42552 | 7784  |
| Dach1         | A_51_P356552  | NM_007826 | dachshund 1 (Drosophila)                    | 1.83  | 10.33 | 0.16264 | 1387 P  | -1.094 | 9.71  | 0.08302 | 2729  |
| Col5a2        | A_51_P247883  | NM_007737 | procollagen, type V, alpha 2                | 1.826 | 5.15  | 0.08421 | 588 P   | 1.013  | 42.43 | 0.77383 | 10951 |
| Adarb1        | A_52_P665604  | AK006823  | adenosine deaminase, RNA-specific, B1       | 1.824 | 10.33 | 0.16528 | 1433 P  | 1.379  | 0.92  | 0.0146  | 624   |
| Cox7a2l       | A_51_P434803  | NM_009187 | cytochrome c oxidase subunit VIIa polype    | 1.824 | 4.65  | 0.14112 | 1051 M  | 1.267  | 4.63  | 0.12227 | 3548  |
| Umod          | A_52_P312806  | NM_009470 | uromodulin                                  | 1.823 |       | 0.49177 | 6338 A  | 1.114  | 13.58 | 0.25649 | 5752  |
| Dner          | A_52_P671132  | NM_152915 | delta/notch-like EGF-related receptor       | 1.818 | 7.45  | 0.17491 | 1379 M  | -1.043 | 40.63 | 0.31571 | 6533  |
| Tmed6         | A_51_P258176  | NM_025458 | transmembrane emp24 protein transport       | 1.816 | 25.79 | 0.33558 | 4788 P  | 1.213  | 3.01  | 0.03779 | 1435  |
| Fn3k          | A_51_P398525  | NM_022014 | fructosamine 3 kinase                       | 1.813 | 12.21 | 0.19392 | 1862 P  | -1.077 | 30.75 | 0.29147 | 6222  |
| Itgav         | A_52_P30341   | AK052514  | integrin alpha V                            | 1.813 | 18.5  | 0.24373 | 2654 P  | 1.245  | 2.53  | 0.03311 | 1292  |
| Gdf10         | A_51_P185247  | NM_145741 | growth differentiation factor 10            | 1.812 | 9.39  | 0.1498  | 1242 P  | 1.149  | 9.71  | 0.17322 | 4429  |
| Nefl          | A_51_P339934  | NM_010910 | neurofilament, light polypeptide            | 1.805 | 10.84 | 0.16749 | 1460 P  | 1.058  | 22.1  | 0.29656 | 6288  |
| Gucy1a3       | A_52_P452540  | NM_021896 | guanylate cyclase 1, soluble, alpha 3       | 1.803 | 12.21 | 0.19726 | 1896 P  | 1.185  | 5.75  | 0.10129 | 3133  |
| Zfp207        | A_52_P381341  | AK164121  | zinc finger protein 207                     | 1.803 | 13.61 | 0.19756 | 1908 P  | -1.062 | 44.4  | 0.67365 | 10084 |
| Gpr146        | A_51_P316379  | NM_030258 | G protein-coupled receptor 146              | 1.8   | 9.39  | 0.14282 | 1165 P  | 1.025  | 36.07 | 0.63764 | 9785  |
| Slc34a1       | A_51_P498442  | NM_011392 | solute carrier family 34 (sodium phosphat   | 1.799 | 10.84 | 0.15198 | 1225 M  | -1.073 | 19.02 | 0.12581 | 3624  |
| AW146020      | A_52_P27849   | AK077263  | expressed sequence AW146020                 | 1.793 |       | 0.44411 | 5256 A  | -1.024 | 47.43 | 0.61706 | 9602  |
| Spred1        | A_51_P422996  | NM_033524 | sprouty protein with EVH-1 domain 1, rel    | 1.79  |       | 0.4699  | 4757 A  | 1.106  | 16.2  | 0.31099 | 6468  |
| Cldn2         | A_52_P251450  | NM_016675 | claudin 2                                   | 1.788 | 72.2  | 0.82667 | 25816 P | -1.15  | 2.04  | 0.03054 | 1210  |
| Evc           | A_52_P476431  | NM_021292 | Ellis van Creveld gene homolog (human)      | 1.788 | 6.57  | 0.09968 | 749 P   | 1.087  | 13.58 | 0.15653 | 4156  |
| App           | A_51_P318104  | M18373    | amyloid beta (A4) precursor protein         | 1.784 | 12.21 | 0.1859  | 1728 P  | 1.453  | 0.24  | 0.0063  | 169   |
| Dpp4          | A_51_P467110  | NM_010074 | dipeptidylpeptidase 4                       | 1.784 | 9.39  | 0.19756 | 1657 M  | 1.122  | 11.33 | 0.22271 | 5250  |
| Fxr1h         | A_52_P166681  | AK020641  | fragile X mental retardation gene 1, autos  | 1.783 | 8.15  | 0.12849 | 1010 P  | 1.006  | 42.43 | 0.93342 | 12416 |



|               |               |              |                                              |       |       |         |         |        |       |         |       |
|---------------|---------------|--------------|----------------------------------------------|-------|-------|---------|---------|--------|-------|---------|-------|
| Idi1          | A_52_P441634  | NM_177960    | isopentenyl-diphosphate delta isomerase      | 1.779 | 13.61 | 0.2021  | 1970 P  | -1.109 | 43.15 | 0.68243 | 10161 |
| Sema3b        | A_52_P426698  | NM_001042779 | sema domain, immunoglobulin domain (I        | 1.775 | 35.45 | 0.43315 | 7453 P  | -1.091 | 22.1  | 0.18898 | 4707  |
| Insig1        | A_52_P393392  | NM_153526    | insulin induced gene 1                       | 1.774 | 10.84 | 0.17552 | 1580 P  | -1.213 | 22.1  | 0.43222 | 7860  |
| Slc5a1        | A_52_P669128  | NM_019810    | solute carrier family 5 (sodium/glucose co   | 1.773 | 35.45 | 0.43567 | 7513 P  | 1.505  | 0.56  | 0.01695 | 733   |
| Gdf3          | A_51_P217039  | NM_008108    | growth differentiation factor 3              | 1.764 | 25.79 | 0.24145 | 2479 P  | -1.019 | 49.47 | 0.74363 | 10738 |
| Tnc           | A_51_P291438  | NM_011607    | tenascin C                                   | 1.763 | 12.21 | 0.1849  | 1698 P  | -1.08  | 16.2  | 0.11626 | 3403  |
| Mrpl1         | A_52_P86073   | NM_001039084 | mitochondrial ribosomal protein L1           | 1.76  | 9.39  | 0.14222 | 1157 P  | 1.101  | 13.58 | 0.25329 | 5700  |
| Ccrn4l        | A_51_P189777  | NM_009834    | CCR4 carbon catabolite repression 4-like     | 1.759 | 6.91  | 0.16264 | 1271 M  | -1.188 | 1.62  | 0.03962 | 1508  |
| Cd81          | A_51_P223443  | NM_133655    | CD 81 antigen                                | 1.758 | 35.45 | 0.43065 | 6112 M  | 1.155  | 6.98  | 0.09505 | 2998  |
| Il16          | A_52_P558502  | AK038014     | interleukin 16                               | 1.758 | 6.91  | 0.10221 | 765 P   | 1.081  | 11.33 | 0.10136 | 3134  |
| 2700092H06Rik | A_51_P110220  | AK083290     | RIKEN cDNA 2700092H06 gene                   | 1.755 | 25.79 | 0.31761 | 4312 P  | 1.061  | 22.1  | 0.37012 | 7165  |
| Ppp1r1a       | A_51_P293538  | NM_021391    | protein phosphatase 1, regulatory (inhibi    | 1.755 | 6.57  | 0.16264 | 1237 M  | 1.214  | 2.04  | 0.0156  | 665   |
| Fmod          | A_51_P207622  | NM_021355    | fibromodulin                                 | 1.754 | 20.94 | 0.27669 | 3358 P  | 1.051  | 25.31 | 0.43286 | 7870  |
| Aldh1a1       | A_51_P334942  | NM_013467    | aldehyde dehydrogenase family 1, subfan      | 1.753 | 28.61 | 0.33757 | 4859 P  | 1.156  | 9.71  | 0.20244 | 4937  |
| Cav1          | A_52_P306845  | NM_007616    | caveolin, caveolae protein 1                 | 1.752 | 8.15  | 0.13299 | 1054 P  | -1.087 | 42.43 | 0.60076 | 9459  |
| Clcn3         | A_52_P462049  | AK036501     | chloride channel 3                           | 1.751 | 18.5  | 0.25084 | 2796 P  | 1.212  | 1.62  | 0.01278 | 542   |
| Mrpl50        | A_52_P432780  | NM_178603    | mitochondrial ribosomal protein L50          | 1.751 | 20.94 | 0.25347 | 2863 P  | 1.131  | 9.71  | 0.15934 | 4203  |
| Spp1          | A_51_P358765  | NM_009263    | secreted phosphoprotein 1                    | 1.751 | 53.87 | 0.59378 | 13158 P | 2.227  | 0.24  | 0.01278 | 544   |
| Nfia          | A_52_P231217  | AK050320     | nuclear factor I/A                           | 1.749 | 23.47 | 0.2848  | 3522 P  | 1.073  | 25.31 | 0.49031 | 8434  |
| Eif2c1        | A_52_P313035  | NM_153403    | eukaryotic translation initiation factor 2C, | 1.747 | 38.68 | 0.29829 | 3091 M  | 1.131  | 6.98  | 0.05903 | 2107  |
| Phka2         | A_51_P368950  | AK018208     | phosphorylase kinase alpha 2                 | 1.747 | 20.94 | 0.26649 | 3092 P  | -1.326 | 0.51  | 0.01177 | 472   |
| Commd1        | A_51_P218205  | NM_144514    | COMM domain containing 1                     | 1.744 | 10.33 | 0.16264 | 1392 P  | 1.048  | 25.31 | 0.3411  | 6779  |
| 4932408B21Rik | A_52_P512137  | NM_172535    | IQ motif and ubiquitin domain containg       | 1.742 | 10.33 | 0.37646 | 4808 A  | -1.094 | 40.63 | 0.58625 | 9308  |
| Tbl1xr1       | A_51_P292057  | NM_030732    | transducin (beta)-like 1X-linked receptor    | 1.74  | 10.33 | 0.16091 | 1359 P  | 1.467  | 0.24  | 0.00591 | 106   |
| Dapk1         | A_52_P445346  | AK009701     | death associated protein kinase 1            | 1.737 | 45.92 | 0.53335 | 10824 P | 1.067  | 19.02 | 0.30947 | 6430  |
| Hlx1          | A_51_P179701  | NM_008250    | H2.O-like homeo box 1 (Drosophila)           | 1.736 | 28.61 | 0.354   | 5219 P  | -1.208 | 1.58  | 0.03605 | 1400  |
| Itn2a         | A_51_P516870  | NM_008409    | integral membrane protein 2A                 | 1.736 | 45.92 | 0.51314 | 10068 P | 1.119  | 8.32  | 0.09118 | 2927  |
| Fzd6          | A_52_P217710  | NM_008056    | frizzled homolog 6 (Drosophila)              | 1.735 | 9.39  | 0.14282 | 1164 P  | 1.153  | 3.82  | 0.03466 | 1327  |
| C330050A14Rik | A_52_P89002   | AK084600     | RIKEN cDNA C330050A14 gene                   | 1.732 |       | 0.47441 | 5941 A  | 1.035  | 30.75 | 0.44272 | 7941  |
| Il17rc        | A_52_P48976   | AK033890     | interleukin 17 receptor C                    | 1.731 | 49.93 | 0.37939 | 5438 M  | -1.108 | 13.58 | 0.13456 | 3756  |
| Ptprz1        | A_51_P206405  | XM_888896    | protein tyrosine phosphatase, receptor ty    | 1.728 | 10.33 | 0.15741 | 1312 P  | 1.197  | 5.75  | 0.12523 | 3606  |
| Trim24        | A_52_P148571  | AK084870     | tripartite motif protein 24                  | 1.728 |       | 0.49127 | 5156 A  | 1.071  | 19.02 | 0.25196 | 5682  |
| Lrp1          | A_52_P202045  | AK078273     | low density lipoprotein receptor-related p   | 1.727 | 9.39  | 0.1441  | 1186 P  | -1.01  | 49.48 | 0.90658 | 12159 |
| Prrx1         | A_51_P209778  | NM_001025570 | paired related homeobox 1                    | 1.723 | 8.15  | 0.13061 | 1028 P  | -1.303 | 0.51  | 0.00697 | 215   |
| Plec1         | A_52_P1100772 | AK089422     | plectin 1                                    | 1.72  | 6.91  | 0.208   | 1770 M  | -1.146 | 6.98  | 0.1174  | 3428  |
| Scml2         | A_52_P134598  | NM_133194    | sex comb on midleg-like 2 (Drosophila)       | 1.72  | 9.39  | 0.1416  | 1144 P  | -1.01  | 49.48 | 0.83907 | 11523 |
| Sema5b        | A_52_P385824  | BC052397     | sema domain, seven thrombospondin rep        | 1.719 | 35.45 | 0.30252 | 3377 M  | 1.025  | 38.4  | 0.72778 | 10549 |
| Mapk6         | A_51_P193925  | AK011505     | mitogen-activated protein kinase 6           | 1.717 | 28.61 | 0.34663 | 5037 P  | 1.137  | 6.98  | 0.06941 | 2384  |
| Paqr9         | A_52_P450934  | NM_198414    | progesterin and adipoQ receptor family me    | 1.717 | 10.33 | 0.16221 | 1365 P  | 1.097  | 11.33 | 0.12271 | 3556  |
| Ppargc1a      | A_52_P5945    | AK032149     | peroxisome proliferative activated recept    | 1.716 | 13.61 | 0.19726 | 1897 P  | 1.098  | 9.71  | 0.07774 | 2588  |
| Vapb          | A_51_P323443  | NM_019806    | vesicle-associated membrane protein, ass     | 1.716 | 6.57  | 0.09691 | 723 P   | 1.502  | 0     | 0.00584 | 19    |
| 4930519N13Rik | A_52_P402663  | AK019685     | RIKEN cDNA 4930519N13 gene                   | 1.715 | 7.45  | 0.12136 | 932 P   | 1.084  | 22.1  | 0.45861 | 8088  |
| Csf1          | A_51_P195506  | NM_007778    | colony stimulating factor 1 (macrophage)     | 1.707 | 18.5  | 0.22995 | 2350 P  | -1.051 | 38.4  | 0.294   | 6270  |
| Cd68          | A_51_P120470  | NM_009853    | CD68 antigen                                 | 1.705 | 12.21 | 0.19042 | 1810 P  | 1.059  | 19.02 | 0.24617 | 5592  |
| Pcna          | A_51_P396351  | NM_011045    | proliferating cell nuclear antigen           | 1.705 | 25.79 | 0.30418 | 3999 P  | -1.123 | 19.02 | 0.26039 | 5824  |
| Hsd3b1        | A_51_P421418  | NM_008293    | hydroxy-delta-5-steroid dehydrogenase, 3     | 1.698 | 3.78  | 0.07471 | 514 M   | 1.023  | 36.07 | 0.63317 | 9747  |
| Mtx2          | A_52_P101260  | NM_016804    | metaxin 2                                    | 1.695 | 18.5  | 0.24333 | 2614 P  | -1.04  | 44.4  | 0.49494 | 8509  |
| Ccr2          | A_52_P580853  | AK162705     |                                              | 1.693 | 35.45 | 0.42959 | 7331 P  | 1.081  | 19.02 | 0.34895 | 6859  |
| Rab5b         | A_52_P407022  | NM_177411    | RAB5B, member RAS oncogene family            | 1.689 | 38.68 | 0.4443  | 7782 P  | 1.168  | 5.75  | 0.06523 | 2296  |
| Ttc15         | A_51_P299655  | AK086217     | tetratricopeptide repeat domain 15           | 1.689 |       | 0.50395 | 5466 A  | -1.059 | 30.75 | 0.19623 | 4840  |
| 5330426P16Rik | A_51_P507234  | XM_992800    | RIKEN cDNA 5330426P16 gene                   | 1.686 | 45.92 | 0.51378 | 10082 P | -1.081 | 16.2  | 0.11108 | 3300  |
| Tcte1         | A_51_P488103  | NM_013688    | t-complex-associated testis expressed 1      | 1.686 | 23.47 | 0.28827 | 3583 P  | -1.162 | 1.62  | 0.02808 | 1139  |
| Apoe          | A_51_P171999  | NM_009696    | apolipoprotein E                             | 1.685 | 23.47 | 0.32361 | 3702 M  | 1.058  | 22.1  | 0.31769 | 6555  |



|               |               |           |                                              |       |       |         |         |        |       |         |       |
|---------------|---------------|-----------|----------------------------------------------|-------|-------|---------|---------|--------|-------|---------|-------|
| Cfh           | A_52_P309381  | NM_009888 | complement component factor h                | 1.681 | 28.61 | 0.3524  | 5174 P  | 1.015  | 42.43 | 0.85819 | 11664 |
| Diap2         | A_52_P843369  | AK040942  | diaphanous homolog 2 (Drosophila)            | 1.679 |       | 0.32647 | 3696 A  | 1.042  | 25.31 | 0.34094 | 6778  |
| Rnf19         | A_51_P277444  | NM_013923 | ring finger protein (C3HC4 type) 19          | 1.676 | 7.45  | 0.12178 | 939 P   | 1.329  | 2.04  | 0.0494  | 1826  |
| Sncalp        | A_52_P59264   | NM_026408 | synuclein, alpha interacting protein (synp   | 1.676 | 3.82  | 0.07997 | 542 P   | 1.058  | 19.02 | 0.22415 | 5269  |
| Slit2         | A_51_P496569  | NM_178804 | slit homolog 2 (Drosophila)                  | 1.675 | 35.45 | 0.39534 | 6398 P  | 1.109  | 8.32  | 0.08418 | 2752  |
| Pik4cb        | A_51_P202320  | NM_175356 | phosphatidylinositol 4-kinase, catalytic, b  | 1.674 | 10.33 | 0.15619 | 1300 P  | 1.15   | 4.63  | 0.03695 | 1407  |
| Pggt1b        | A_52_P607331  | AK087098  | protein geranylgeranyltransferase type I,    | 1.673 | 18.5  | 0.23874 | 2526 P  | -1.216 | 0.92  | 0.01509 | 644   |
| Mif           | A_52_P321733  | NM_010798 | macrophage migration inhibitory factor       | 1.671 | 6.91  | 0.10911 | 836 P   | 1.064  | 19.02 | 0.24091 | 5513  |
| Rarres2       | A_52_P466147  | NM_027852 | retinoic acid receptor responder (tazarote   | 1.67  | 7.45  | 0.11684 | 895 P   | 1.115  | 16.2  | 0.41974 | 7725  |
| H19           | A_51_P142196  | AK145379  | H19 fetal liver mRNA                         | 1.666 | 72.2  | 0.76076 | 15746 M | 1.131  | 13.58 | 0.34968 | 6868  |
| Lox           | A_51_P300493  | NM_010728 | lysyl oxidase                                | 1.666 | 45.92 | 0.51894 | 10314 P | 1.005  | 42.43 | 0.94157 | 12497 |
| Exosc9        | A_52_P295955  | AK083794  | exosome component 9                          | 1.665 | 31.88 | 0.29606 | 2607 M  | -1.057 | 42.43 | 0.41601 | 7697  |
| Tgfb1         | A_51_P212754  | NM_009369 | transforming growth factor, beta induced     | 1.665 | 18.5  | 0.24049 | 2555 P  | 1.044  | 30.75 | 0.52699 | 8815  |
| Fmo2          | A_52_P1138659 | AK009224  | flavin containing monooxygenase 2            | 1.662 | 6.91  | 0.1102  | 846 P   | 1.006  | 42.43 | 0.96884 | 12734 |
| Atp2a2        | A_52_P1156808 | AK080543  | ATPase, Ca++ transporting, cardiac muscle    | 1.66  | 18.5  | 0.23595 | 2460 P  | 1.037  | 28.13 | 0.36824 | 7137  |
| Snx6          | A_52_P85875   | NM_026998 | sorting nexin 6                              | 1.66  | 18.5  | 0.23742 | 2481 P  | 1.312  | 3.46  | 0.08784 | 2835  |
| Ifih1         | A_51_P387810  | NM_027835 | interferon induced with helicase C domain    | 1.659 | 7.45  | 0.11273 | 869 P   | 1.236  | 2.04  | 0.02177 | 914   |
| Col14a1       | A_51_P326529  | NM_181277 | procollagen, type XIV, alpha 1               | 1.655 | 57.76 | 0.64378 | 15885 P | 1.44   | 1.62  | 0.04508 | 1504  |
| Pls3          | A_51_P271614  | NM_145629 | plastin 3 (T-isoform)                        | 1.655 | 5.86  | 0.17353 | 1360 M  | 1.199  | 5.75  | 0.09289 | 2962  |
| Ctsf          | A_52_P660945  | NM_019861 | cathepsin F                                  | 1.653 | 3.78  | 0.08018 | 562 P   | -1.087 | 28.13 | 0.25085 | 5656  |
| Serping1      | A_51_P376238  | NM_009776 | serine (or cysteine) peptidase inhibitor, cl | 1.652 | 10.84 | 0.16991 | 1478 P  | 1.117  | 5.75  | 0.04379 | 1637  |
| Al427515      | A_51_P425167  | NM_173016 | expressed sequence Al427515                  | 1.647 | 16.01 | 0.20511 | 2011 P  | 1.211  | 3.46  | 0.04159 | 1573  |
| Pou6f2        | A_51_P148684  | NM_175006 | POU domain, class 6, transcription factor    | 1.647 | 18.5  | 0.22708 | 2314 P  | 1.094  | 11.33 | 0.11939 | 3487  |
| B930037P14Rik | A_52_P150654  | AK037118  | RIKEN cDNA B930037P14 gene                   | 1.645 | 45.92 | 0.5101  | 9937 P  | -1.005 | 49.48 | 0.9709  | 12751 |
| 2410025L10Rik | A_51_P363525  | NM_028596 | RIKEN cDNA 2410025L10 gene                   | 1.644 | 20.94 | 0.261   | 3004 P  | -1.278 | 0.51  | 0.0093  | 337   |
| Gdf8          | A_51_P384901  | NM_010834 | growth differentiation factor 8              | 1.644 | 10.33 | 0.15198 | 1261 M  | 1.02   | 38.4  | 0.6913  | 10247 |
| Mest          | A_51_P124535  | NM_008590 | mesoderm specific transcript                 | 1.644 | 42.28 | 0.49127 | 9267 P  | 1.253  | 1.62  | 0.01485 | 636   |
| Rad18         | A_51_P480855  | NM_021385 | RAD18 homolog (S. cerevisiae)                | 1.638 | 9.39  | 0.1416  | 1146 P  | -1.02  | 49    | 0.7132  | 10431 |
| Arsb          | A_52_P105801  | AK140163  | arylsulfatase B                              | 1.636 | 28.61 | 0.32734 | 4568 P  | -1.053 | 40.63 | 0.35632 | 6971  |
| Tmeff2        | A_52_P229052  | NM_019790 | transmembrane protein with EGF-like and      | 1.633 | 23.47 | 0.27143 | 3200 P  | 1.017  | 40.63 | 0.79691 | 11152 |
| Pacsin3       | A_51_P223084  | AK014830  | protein kinase C and casein kinase substr    | 1.631 | 49.93 | 0.42383 | 6894 P  | -1.085 | 19.02 | 0.13742 | 3796  |
| Slc27a2       | A_52_P154971  | NM_011978 | solute carrier family 27 (fatty acid transp  | 1.631 | 49.93 | 0.54443 | 11172 P | 1.135  | 13.58 | 0.33314 | 6716  |
| Copz1         | A_52_P779205  | AK028719  |                                              | 1.629 | 28.61 | 0.33839 | 4896 P  | 1.12   | 9.71  | 0.1319  | 3708  |
| Mdh1          | A_52_P470451  | AK077724  | malate dehydrogenase 1, NAD (soluble)        | 1.627 | 38.68 | 0.44142 | 7697 M  | 1.22   | 4.63  | 0.09033 | 2903  |
| Gdf9          | A_51_P220806  | NM_008110 | growth differentiation factor 9              | 1.626 | 61.79 | 0.56738 | 10516 P | -1.033 | 45.05 | 0.49414 | 8491  |
| Rheb1         | A_52_P354123  | NM_026967 | Ras homolog enriched in brain like 1         | 1.625 | 20.94 | 0.26618 | 3085 P  | 1.17   | 3.82  | 0.03962 | 1510  |
| Cntfr         | A_51_P184184  | NM_016673 | ciliary neurotrophic factor receptor         | 1.624 | 35.45 | 0.41615 | 6929 P  | 1.136  | 8.32  | 0.09066 | 2909  |
| Kctd12        | A_51_P371912  | NM_177715 | potassium channel tetramerisation doma       | 1.624 | 8.15  | 0.1295  | 1021 P  | 1.224  | 3.46  | 0.04398 | 1646  |
| Ndubf8        | A_52_P252539  | AK028070  | NADH dehydrogenase (ubiquinone) 1 bet        | 1.623 | 16.01 | 0.2189  | 2182 P  | 1.138  | 8.32  | 0.09282 | 2959  |
| Olfml3        | A_51_P191782  | NM_133859 | olfactomedin-like 3                          | 1.622 | 53.87 | 0.61137 | 14013 P | 1.089  | 9.71  | 0.09157 | 2930  |
| Ifitm1        | A_52_P541802  | NM_026820 | interferon induced transmembrane prote       | 1.619 | 25.79 | 0.29875 | 3819 P  | -1.018 | 49.48 | 0.79542 | 11140 |
| D5Erttd579e   | A_52_P203773  | AK083736  | DNA segment, Chr 5, ERATO Doi 579, exp       | 1.618 | 10.84 | 0.1716  | 1514 P  | 1.393  | 0.75  | 0.01251 | 511   |
| Calca         | A_51_P290826  | NM_007587 | calcitonin/calcitonin-related polypeptide,   | 1.615 | 13.61 | 0.19135 | 1827 P  | -1.069 | 33.49 | 0.28906 | 6201  |
| Snrpb2        | A_52_P638637  | NM_021335 | U2 small nuclear ribonucleoprotein B         | 1.614 | 12.21 | 0.20335 | 1934 P  | 1.358  | 1.17  | 0.01781 | 756   |
| Fzd9          | A_51_P511015  | AK021164  | frizzled homolog 9 (Drosophila)              | 1.612 | 31.88 | 0.35343 | 5198 P  | 1.085  | 11.33 | 0.10217 | 3158  |
| Sms           | A_52_P545192  | AK049780  | spermine synthase                            | 1.606 | 35.45 | 0.35679 | 4591 P  | 1.028  | 33.49 | 0.50203 | 8602  |
| 9030409G11Rik | A_52_P590339  | BC022941  | RIKEN cDNA 9030409G11 gene                   | 1.605 | 49.93 | 0.42023 | 6526 M  | -1.008 | 49.48 | 0.95294 | 12603 |
| Hdh3          | A_51_P465582  | NM_024257 | haloacid dehalogenase-like hydrolase dor     | 1.605 | 13.61 | 0.19756 | 1905 P  | -1.045 | 43.15 | 0.42028 | 7733  |
| Niban         | A_51_P467798  | NM_022018 | niban protein                                | 1.603 | 35.45 | 0.39458 | 6336 P  | -1.087 | 19.02 | 0.15385 | 4112  |
| 5730508B09Rik | A_52_P23308   | NM_027482 | RIKEN cDNA 5730508B09 gene                   | 1.599 | 23.47 | 0.28891 | 3604 P  | -1.001 | 49.48 | 0.9828  | 12885 |
| 6330569M22Rik | A_52_P400234  | AK035833  | RIKEN cDNA 6330569M22 gene                   | 1.597 | 84.56 | 0.67613 | 12159 M | 1.037  | 30.75 | 0.55846 | 9087  |
| Fst           | A_51_P381821  | NM_008046 | follistatin                                  | 1.597 | 31.88 | 0.29265 | 3544 M  | 1.037  | 28.13 | 0.39291 | 7434  |
| Fuca1         | A_51_P108757  | NM_024243 | fucosidase, alpha-L- 1, tissue               | 1.594 | 8.15  | 0.13196 | 1043 P  | -1.221 | 1.1   | 0.01949 | 823   |

|               |              |                    |                                                    |       |       |         |         |        |       |         |       |
|---------------|--------------|--------------------|----------------------------------------------------|-------|-------|---------|---------|--------|-------|---------|-------|
| Pik3c2a       | A_52_P563489 | AK013614           | phosphatidylinositol 3-kinase, C2 domain           | 1.594 | 49.93 | 0.57624 | 10823 M | 1.144  | 5.75  | 0.06194 | 2190  |
| Mcm6          | A_51_P360492 | NM_008567          | minichromosome maintenance deficient               | 1.593 | 25.79 | 0.29815 | 3769 P  | 1.082  | 11.33 | 0.13256 | 3720  |
| Sh3gl2        | A_52_P196161 | NM_019535          | SH3-domain GRB2-like 2                             | 1.593 | 16.01 | 0.20466 | 1997 P  | 1.268  | 1.17  | 0.01002 | 378   |
| Chn2          | A_52_P302587 | NM_023543          | chimerin (chimaerin) 2                             | 1.592 | 23.47 | 0.26547 | 3073 P  | 1.001  | 42.43 | 0.98495 | 12929 |
| Tbc1d14       | A_51_P486449 | NM_133910          | TBC1 domain family, member 14                      | 1.592 | 13.61 | 0.19341 | 1860 P  | -1.122 | 9.71  | 0.11815 | 3441  |
| Enpp5         | A_51_P362104 | NM_032003          | ectonucleotide pyrophosphatase/phosph              | 1.59  | 4.65  | 0.09678 | 717 P   | 1.024  | 38.4  | 0.73571 | 10641 |
| Garnl3        | A_52_P537376 | AK084611           | GTPase activating RANGAP domain-like 3             | 1.586 | 25.79 | 0.29937 | 3834 P  | -1.113 | 6.98  | 0.06449 | 2267  |
| Pygb          | A_51_P485810 | NM_153781          | brain glycogen phosphorylase                       | 1.583 | 10.33 | 0.15198 | 1256 P  | 1.149  | 4.63  | 0.03732 | 1421  |
| T             | A_51_P285725 | NM_009309          | brachyury                                          | 1.583 |       | 0.68467 | 7984 A  | 1.04   | 28.13 | 0.37192 | 7192  |
| Agpat3        | A_51_P425490 | NM_053014          | 1-acylglycerol-3-phosphate O-acyltransferase       | 1.582 | 12.21 | 0.182   | 1648 P  | -1.194 | 1.1   | 0.01648 | 705   |
| Sat1          | A_52_P640282 | NM_009121          | spermidine/spermine N1-acetyl transferase          | 1.582 | 31.88 | 0.37646 | 5801 P  | 1.254  | 2.04  | 0.02049 | 882   |
| Echdc2        | A_51_P477414 | NM_026728          | enoyl Coenzyme A hydratase domain containing       | 1.581 | 31.88 | 0.34986 | 5118 P  | -1.252 | 0.51  | 0.00932 | 339   |
| Nfat5         | A_52_P177904 | AK045123           | nuclear factor of activated T-cells 5              | 1.579 | 8.15  | 0.13808 | 1092 P  | 1.025  | 38.4  | 0.7417  | 10701 |
| Col1a2        | A_51_P182303 | NM_007743          | procollagen, type I, alpha 2                       | 1.577 | 18.5  | 0.2353  | 2445 P  | -1.042 | 42.43 | 0.32562 | 6621  |
| C1qb          | A_51_P351860 | NM_009777          | complement component 1, q subcomponent             | 1.573 | 7.45  | 0.12174 | 936 P   | 1.01   | 42.43 | 0.92251 | 12290 |
| Nin           | A_52_P597696 | NM_008697          | ninein                                             | 1.573 | 12.21 | 0.1859  | 1730 P  | -1.051 | 36.07 | 0.246   | 5585  |
| Pkm2          | A_51_P428913 | D38379             | pyruvate kinase, muscle                            | 1.573 | 7.45  | 0.14655 | 1150 P  | 1.087  | 19.02 | 0.34172 | 6792  |
| Col6a2        | A_51_P279639 | NM_146007          | procollagen, type VI, alpha 2                      | 1.572 | 20.94 | 0.24748 | 2743 P  | 1.13   | 8.32  | 0.10096 | 3124  |
| Ngfrap1       | A_51_P408155 | NM_009750          | nerve growth factor receptor (TNFRSF16)            | 1.572 | 13.61 | 0.26436 | 2592 M  | -1.036 | 46.3  | 0.63446 | 9759  |
| Sfrp1         | A_51_P352296 | NM_013834          | secreted frizzled-related sequence protein         | 1.572 | 28.61 | 0.3145  | 4244 P  | 1.051  | 30.75 | 0.66916 | 10041 |
| Zdhhc21       | A_52_P168505 | NM_026647          | zinc finger, DHHC domain containing 21             | 1.572 | 45.92 | 0.52052 | 10368 P | 1.043  | 25.31 | 0.31686 | 6549  |
| Cd63          | A_51_P511810 | NM_001042580       | Cd63 antigen                                       | 1.57  | 18.5  | 0.29726 | 3149 M  | 1.348  | 3.01  | 0.07851 | 2615  |
| Map3k7ip2     | A_52_P242400 | AK086230           | mitogen-activated protein kinase kinase kinase     | 1.569 |       | 0.30777 | 3356 A  | 1.311  | 5.75  | 0.21473 | 5111  |
| Paps2         | A_51_P258551 | AK029185           | 3'-phosphoadenosine 5'-phosphosulfate              | 1.569 | 42.28 | 0.45401 | 8029 P  | 1.644  | 0.24  | 0.01058 | 405   |
| Plat          | A_51_P301566 | NM_008872          | plasminogen activator, tissue                      | 1.568 | 28.61 | 0.32076 | 4385 P  | 1.108  | 11.33 | 0.20807 | 5024  |
| Aars          | A_52_P567035 | AK087291           | alanyl-tRNA synthetase                             | 1.567 | 42.28 | 0.30716 | 3916 P  | 1.005  | 42.43 | 0.94037 | 12482 |
| Fibp          | A_51_P518246 | NM_021438          | fibroblast growth factor (acidic) intracellular    | 1.567 | 23.47 | 0.26693 | 3099 P  | 1.072  | 16.2  | 0.22129 | 5225  |
| Hmgcs1        | A_52_P119039 | AK078743           | 3-hydroxy-3-methylglutaryl-Coenzyme A synthase     | 1.567 | 53.87 | 0.57766 | 12378 P | -1.217 | 25.31 | 0.47848 | 8290  |
| Tcf4          | A_52_P521101 | NM_013685          | transcription factor 4                             | 1.566 | 20.94 | 0.24021 | 2541 P  | 1.037  | 28.13 | 0.38403 | 7330  |
| Rab27a        | A_52_P426740 | NM_023635          | RAB27A, member RAS oncogene family                 | 1.564 | 83.36 | 0.7703  | 19968 P | 1.125  | 9.71  | 0.12083 | 3506  |
| Tiparp        | A_51_P514961 | NM_178892          | TCDD-inducible poly(ADP-ribose) polymerase         | 1.564 | 57.76 | 0.64769 | 15996 P | 1.324  | 3.46  | 0.11108 | 3297  |
| B230120H23Rik | A_52_P522379 | NM_178084          | RIKEN cDNA B230120H23 gene                         | 1.56  | 9.39  | 0.14314 | 1168 P  | -1.142 | 6.98  | 0.11996 | 3493  |
| Gas5          | A_51_P366867 | X59728             | growth arrest specific 5                           | 1.559 | 25.79 | 0.36307 | 4582 M  | 1.132  | 6.98  | 0.06629 | 2327  |
| Id4           | A_52_P449871 | NM_031166          | inhibitor of DNA binding 4                         | 1.558 | 25.79 | 0.30153 | 3900 P  | 1.031  | 42.43 | 0.88809 | 11941 |
| 4930506M07Rik | A_51_P200561 | NM_175172          | RIKEN cDNA 4930506M07 gene                         | 1.556 | 6.91  | 0.21349 | 1850 M  | 1.147  | 8.32  | 0.14431 | 3926  |
| Bloc1s1       | A_52_P546540 | NM_015740          | biogenesis of lysosome-related organelles          | 1.556 | 10.84 | 0.17066 | 1498 P  | 1.098  | 11.33 | 0.12406 | 3580  |
| Rad50         | A_52_P101496 | BC002033           | RAD50 homolog (S. cerevisiae)                      | 1.556 |       | 0.57183 | 6803 A  | 1.112  | 8.32  | 0.06339 | 2245  |
| 3110049J23Rik | A_52_P241619 | NM_026085          | RIKEN cDNA 3110049J23 gene                         | 1.554 | 20.94 | 0.24642 | 2736 P  | -1.019 | 49.48 | 0.78435 | 11047 |
| Ddit3         | A_52_P533146 | NM_007837          | DNA-damage inducible transcript 3                  | 1.554 | 57.76 | 0.61689 | 14219 P | -1.042 | 43.75 | 0.41589 | 7693  |
| Mpp7          | A_52_P57889  | AK141108           | membrane protein, palmitoylated 7 (MAPK)           | 1.554 | 16.01 | 0.20919 | 2057 P  | -1.16  | 3.01  | 0.04505 | 1680  |
| Six1          | A_52_P586679 | NM_009189          | sine oculis-related homeobox 1 homolog             | 1.552 |       | 0.32985 | 4483 A  | 1.058  | 19.02 | 0.21643 | 5135  |
| Pclo          | A_52_P141641 | AB083477           | piccolo (presynaptic cytomatrix protein)           | 1.551 | 28.61 | 0.32081 | 4391 P  | 1.209  | 5.75  | 0.1388  | 3816  |
| Aaas          | A_52_P242199 | AK051635           | achalasia, adrenocortical insufficiency, alacrimia | 1.548 | 49.93 | 0.51754 | 9832 M  | 1.055  | 22.1  | 0.34062 | 6775  |
| Pik3c3        | A_52_P287683 | NM_181414          | phosphoinositide-3-kinase, class 3                 | 1.547 | 13.61 | 0.19693 | 1893 P  | 1.037  | 36.07 | 0.75681 | 10836 |
| Fgf14         | A_52_P1011   | NM_010201          | fibroblast growth factor 14                        | 1.546 | 20.94 | 0.259   | 2980 P  | 1.243  | 3.82  | 0.08197 | 2703  |
| Zfx1b         | A_52_P596008 | NM_015753          | zinc finger E-box binding homeobox 2               | 1.546 | 31.88 | 0.35438 | 5230 P  | 1.013  | 40.63 | 0.75469 | 10822 |
| Nrk           | A_51_P461005 | NM_013724          | Nik related kinase                                 | 1.545 | 61.79 | 0.21493 | 1849 M  | 1.067  | 22.1  | 0.40439 | 7561  |
| Zfp644        | A_51_P118822 | AK044814           | zinc finger protein 644                            | 1.542 | 57.76 | 0.429   | 6757 M  | 1.127  | 5.75  | 0.0408  | 1552  |
| Vav3          | A_52_P613596 | NM_020505          | vav 3 oncogene                                     | 1.54  | 18.5  | 0.22777 | 2317 P  | 1.127  | 6.98  | 0.05934 | 2130  |
| Atf5          | A_51_P269216 | NM_030693          | activating transcription factor 5                  | 1.539 | 23.47 | 0.33423 | 3957 M  | -1.046 | 43.75 | 0.4904  | 8440  |
| Prps2         | A_52_P32864  | NM_026662          | phosphoribosyl pyrophosphate synthetase            | 1.539 | 13.61 | 0.19014 | 1809 P  | -1.083 | 33.49 | 0.35146 | 6895  |
| D12Erd551e    | A_52_P683432 | ENSMUST00000070837 | DNA segment, Chr 12, ERATO Doi 551, exons          | 1.538 | 10.84 | 0.1716  | 1524 P  | 1.144  | 4.63  | 0.03391 | 1312  |
| Nrip1         | A_52_P413584 | AK078829           | nuclear receptor interacting protein 1             | 1.538 | 4.65  | 0.10711 | 817 P   | 1.466  | 0.24  | 0.00957 | 345   |

|               |               |                    |                                                                               |       |       |         |         |        |       |         |       |
|---------------|---------------|--------------------|-------------------------------------------------------------------------------|-------|-------|---------|---------|--------|-------|---------|-------|
| Ly86          | A_51_P465350  | NM_010745          | lymphocyte antigen 86                                                         | 1.537 | 45.92 | 0.49841 | 9567 P  | 1.039  | 30.75 | 0.54878 | 9010  |
| Gng3          | A_51_P391291  | NM_010316          | guanine nucleotide binding protein (G protein-coupled receptor class B group) | 1.535 | 61.79 | 0.68148 | 17501 P | -1.138 | 11.33 | 0.17475 | 4467  |
| Sema3a        | A_52_P679511  | AK053115           | sema domain, immunoglobulin domain (class 3a)                                 | 1.534 | 38.68 | 0.37749 | 4190 M  | 1.166  | 11.33 | 0.33055 | 6676  |
| Gcg           | A_51_P406253  | NM_008100          | glucagon                                                                      | 1.533 | 75.14 | 0.82865 | 19307 M | 1.541  | 0.24  | 0.00627 | 155   |
| Tuba1         | A_51_P169745  | NM_011653          | tubulin, alpha 1A                                                             | 1.533 | 10.33 | 0.22589 | 2074 M  | -1.035 | 47.92 | 0.75525 | 10826 |
| Slc4a3        | A_51_P321743  | AK161240           | solute carrier family 4 (anion exchanger), member 3                           | 1.532 | 53.87 | 0.59813 | 13364 P | 1.075  | 13.58 | 0.14616 | 3964  |
| Eprs          | A_52_P653684  | NM_029735          | glutamyl-prolyl-tRNA synthetase                                               | 1.529 | 28.61 | 0.31409 | 4226 P  | 1.181  | 3.46  | 0.02801 | 1129  |
| Rab12         | A_51_P296027  | NM_024448          | RAB12, member RAS oncogene family                                             | 1.529 | 10.33 | 0.15403 | 1288 P  | 1.355  | 0.24  | 0.00584 | 67    |
| Arhgap24      | A_51_P199725  | NM_146161          | Rho GTPase activating protein 24                                              | 1.528 | 10.33 | 0.15273 | 1277 P  | 1.024  | 36.07 | 0.61123 | 9540  |
| Fntb          | A_52_P235241  | NM_145927          | farnesyltransferase, CAAX box, beta                                           | 1.528 | 8.15  | 0.14112 | 1130 P  | -1.027 | 46.3  | 0.53618 | 8904  |
| Stmn2         | A_51_P164998  | NM_025285          | stathmin-like 2                                                               | 1.527 | 61.79 | 0.69977 | 18368 P | -1.117 | 5.75  | 0.06262 | 2217  |
| Centg2        | A_52_P947926  | AK083235           | centaurin, gamma 2                                                            | 1.526 | 16.01 | 0.21119 | 2082 P  | 1.229  | 3.01  | 0.03511 | 1347  |
| C530008M17Rik | A_51_P395206  | AK016430           | RIKEN cDNA C530008M17 gene                                                    | 1.524 | 45.92 | 0.33775 | 4008 M  | 1.03   | 36.07 | 0.72121 | 10505 |
| Mare          | A_51_P169783  | AK086378           | alpha globin regulatory element containing protein                            | 1.524 | 25.79 | 0.29726 | 3750 P  | -1.119 | 6.98  | 0.06612 | 2324  |
| Pcolce        | A_51_P371942  | NM_008788          | procollagen C-endopeptidase enhancer protein                                  | 1.523 | 23.47 | 0.259   | 2971 P  | -1.22  | 1.1   | 0.01985 | 847   |
| Col5a1        | A_51_P414637  | NM_015734          | procollagen, type V, alpha 1                                                  | 1.522 | 31.88 | 0.37281 | 5685 P  | 1.03   | 36.07 | 0.71352 | 10434 |
| Mdk           | A_51_P225665  | NM_010784          | midkine                                                                       | 1.521 | 10.33 | 0.15704 | 1311 P  | -1.137 | 3.82  | 0.05135 | 1885  |
| 1810008A18Rik | A_52_P665335  | NM_133998          | RIKEN cDNA 1810008A18 gene                                                    | 1.52  | 25.79 | 0.2912  | 3646 P  | 1.017  | 40.63 | 0.80618 | 11237 |
| Sh3bgrl3      | A_51_P344752  | NM_080559          | SH3 domain binding glutamic acid-rich protein                                 | 1.52  | 31.88 | 0.37123 | 5646 P  | 1.053  | 30.75 | 0.63197 | 9737  |
| Maf           | A_51_P379230  | NM_001025577       | avian musculoaponeurotic fibrosarcoma (avian sarcoma 1) protein               | 1.519 | 23.47 | 0.261   | 3003 P  | 1.1    | 9.71  | 0.08254 | 2713  |
| Nsmaf         | A_52_P674053  | NM_010945          | neutral sphingomyelinase (N-SMase) activator                                  | 1.518 | 28.61 | 0.31382 | 4222 P  | 1.113  | 6.98  | 0.05411 | 1979  |
| Titf1         | A_52_P216427  | NM_009385          | thyroid transcription factor 1                                                | 1.517 | 10.33 | 0.50704 | 7230 A  | 1.06   | 22.1  | 0.29086 | 6216  |
| Wtap          | A_52_P425790  | NM_175394          | Wilms' tumour 1-associating protein                                           | 1.517 | 12.21 | 0.1859  | 1731 P  | 1.228  | 5.75  | 0.13742 | 3798  |
| Tro           | A_52_P72831   | NM_019548          | trophinin                                                                     | 1.515 | 49.93 | 0.5494  | 11400 P | -1.105 | 25.31 | 0.31283 | 6489  |
| Arhgap6       | A_52_P561746  | NM_009707          | Rho GTPase activating protein 6                                               | 1.514 | 12.21 | 0.26436 | 2593 M  | 1.146  | 4.63  | 0.03906 | 1473  |
| Rasl12        | A_51_P105927  | NM_001033158       | RAS-like, family 12                                                           | 1.513 | 38.68 | 0.42411 | 7170 P  | 1.12   | 8.32  | 0.08432 | 2758  |
| Mpp1          | A_51_P124568  | NM_008621          | membrane protein, palmitoylated                                               | 1.512 | 7.45  | 0.13275 | 1052 P  | 1.167  | 8.32  | 0.14368 | 3918  |
| Col8a1        | A_52_P282058  | NM_007739          | procollagen, type VIII, alpha 1                                               | 1.511 | 65.79 | 0.70237 | 18525 P | 1.022  | 36.07 | 0.58835 | 9323  |
| Elp4          | A_52_P297050  | NM_023876          | elongation protein 4 homolog (S. cerevisiae)                                  | 1.511 | 6.91  | 0.12934 | 1019 P  | -1.156 | 5.75  | 0.1064  | 3211  |
| Pja1          | A_52_P141123  | NM_008853          | praja1, RING-H2 motif containing                                              | 1.511 | 20.94 | 0.23863 | 2520 P  | -1.3   | 1.18  | 0.04706 | 1759  |
| Rcn1          | A_51_P305437  | NM_009037          | reticulocalbin 1                                                              | 1.509 | 10.84 | 0.26363 | 2581 M  | 1.208  | 3.82  | 0.05367 | 1970  |
| Zfhx4         | A_52_P81413   | AK084213           | zinc finger homeodomain 4                                                     | 1.508 | 42.28 | 0.52829 | 9337 M  | 1.064  | 16.2  | 0.20719 | 5010  |
| Ass1          | A_51_P338713  | M31690             | argininosuccinate synthetase 1                                                | 1.507 | 49.93 | 0.52487 | 10532 P | 1.041  | 25.31 | 0.35256 | 6910  |
| Ptprd         | A_52_P605266  | NM_011211          | protein tyrosine phosphatase, receptor type 11                                | 1.507 | 18.5  | 0.22992 | 2346 P  | 1.077  | 16.2  | 0.22995 | 5348  |
| Rbpms         | A_51_P350332  | NM_019733          | RNA binding protein gene with multiple splice variants                        | 1.507 | 10.33 | 0.16239 | 1374 P  | 1.167  | 3.82  | 0.03602 | 1395  |
| Commd9        | A_51_P232705  | NM_029635          | COMM domain containing 9                                                      | 1.506 | 10.33 | 0.16388 | 1417 P  | -1.117 | 8.32  | 0.08895 | 2869  |
| Epm2aip1      | A_52_P37522   | NM_175266          | EPM2A (laforin) interacting protein 1                                         | 1.506 | 49.93 | 0.5505  | 11449 P | -1.097 | 38.4  | 0.50432 | 8623  |
| Serpine2      | A_51_P268094  | NM_009255          | serine (or cysteine) peptidase inhibitor, clade 2, member 2                   | 1.505 | 20.94 | 0.24811 | 2756 P  | -1.04  | 45.05 | 0.55068 | 9035  |
| Aldoa         | A_51_P216905  | NM_007438          | aldolase 1, A isoform                                                         | 1.504 | 35.45 | 0.4384  | 6278 M  | -1.174 | 3.01  | 0.05733 | 2071  |
| Grb10         | A_52_P115787  | NM_010345          | growth factor receptor bound protein 10                                       | 1.504 | 28.61 | 0.37925 | 4916 M  | 1.373  | 0.24  | 0.00591 | 111   |
| Cdkal1        | A_52_P335259  | NM_144536          | CDK5 regulatory subunit associated protein 1                                  | 1.503 | 20.94 | 0.32751 | 3789 M  | -1.014 | 49.48 | 0.75336 | 10810 |
| Fgfr2         | A_51_P432403  | NM_010207          | fibroblast growth factor receptor 2                                           | 1.503 | 28.61 | 0.53362 | 7347 A  | 1.091  | 13.58 | 0.22894 | 5343  |
| Paccin1       | A_52_P531693  | NM_178365          | protein kinase C and casein kinase substrate                                  | 1.502 | 28.61 | 0.32361 | 4460 P  | 1.028  | 33.49 | 0.53923 | 8934  |
| 0610038F07Rik | A_52_P209973  | AK083578           | RIKEN cDNA 0610038F07 gene                                                    | 1.501 | 45.92 | 0.49696 | 9514 P  | -1.001 | 49.48 | 0.97829 | 12826 |
| BC023829      | A_52_P1128182 | ENSMUST00000101506 | cDNA sequence BC023829                                                        | 1.501 | 12.21 | 0.1825  | 1673 P  | 1.145  | 5.75  | 0.05496 | 2006  |
| C1r           | A_51_P384318  | NM_023143          | complement component 1, r subcomponent                                        | 1.501 | 35.45 | 0.37646 | 5780 P  | 1.048  | 28.13 | 0.47441 | 8258  |
| Ttyh3         | A_52_P196105  | NM_175274          | tweety homolog 3 (Drosophila)                                                 | 1.5   | 25.79 | 0.28103 | 3462 P  | 1.204  | 3.01  | 0.03267 | 1283  |
| Tpk1          | A_52_P156540  | NM_013861          | thiamine pyrophosphokinase                                                    | 1.499 | 25.79 | 0.29955 | 3852 P  | -1.102 | 11.33 | 0.11028 | 3278  |
| Zfp503        | A_51_P126626  | NM_145459          | zinc finger protein 503                                                       | 1.497 | 12.21 | 0.17622 | 1585 P  | 1.141  | 8.32  | 0.11384 | 3358  |
| Fgd4          | A_52_P164236  | AK042588           | FYVE, RhoGEF and PH domain containing protein                                 | 1.496 | 6.91  | 0.13335 | 1059 P  | -1.024 | 49.22 | 0.77661 | 10965 |
| Prnp          | A_51_P483280  | NM_011170          | prion protein                                                                 | 1.495 | 7.45  | 0.15519 | 1266 P  | 1.11   | 9.71  | 0.11364 | 3347  |
| Ptn           | A_52_P10793   | NM_008973          | pleiotrophin                                                                  | 1.495 | 10.33 | 0.1626  | 1378 P  | 1.568  | 1.32  | 0.05346 | 1968  |
| Them2         | A_51_P502422  | NM_025790          | thioesterase superfamily member 2                                             | 1.495 | 20.94 | 0.24343 | 2637 P  | -1.035 | 44.4  | 0.43631 | 7898  |

|               |               |                    |                                              |       |       |         |         |        |       |         |       |
|---------------|---------------|--------------------|----------------------------------------------|-------|-------|---------|---------|--------|-------|---------|-------|
| Gabrb3        | A_52_P532006  | NM_008071          | gamma-aminobutyric acid (GABA-A) rece        | 1.494 | 25.79 | 0.29853 | 3795 P  | -1.082 | 38.4  | 0.47423 | 8243  |
| Sox17         | A_52_P365096  | NM_011441          | SRY-box containing gene 17                   | 1.493 |       | 0.80833 | 20030 A | 1.08   | 11.33 | 0.11944 | 3488  |
| Rpl21         | A_52_P653937  | NM_019647          | ribosomal protein L21                        | 1.492 | 13.61 | 0.19861 | 1938 P  | -1.12  | 13.58 | 0.17138 | 4402  |
| Mbp           | A_51_P349205  | NM_010777          | myelin basic protein                         | 1.491 | 25.79 | 0.2984  | 3790 P  | 1.28   | 3.46  | 0.07211 | 2440  |
| Adamts6       | A_52_P604149  | AK030315           | a disintegrin-like and metallopeptidase (m   | 1.49  | 31.88 | 0.34137 | 4951 P  | -1.212 | 0.66  | 0.01059 | 409   |
| Lrp4          | A_52_P635078  | NM_172668          | low density lipoprotein receptor-related p   | 1.49  | 57.76 | 0.61855 | 14338 P | 1.019  | 40.63 | 0.77306 | 10944 |
| Pcsk1n        | A_52_P459657  | AK076137           | proprotein convertase subtilisin/kexin typ   | 1.49  | 42.28 | 0.45116 | 7948 P  | 1.072  | 13.58 | 0.13909 | 3831  |
| Shprh         | A_52_P209748  | AK037266           | SNF2 histone linker PHD RING helicase        | 1.49  | 20.94 | 0.24333 | 2622 P  | 1.003  | 42.43 | 0.97949 | 12837 |
| 6530401C20Rik | A_51_P114634  | NM_173405          | RIKEN cDNA 6530401C20 gene                   | 1.489 | 25.79 | 0.30153 | 3904 P  | -1.276 | 0.56  | 0.01398 | 586   |
| Gmfb          | A_52_P492176  | NM_022023          | glia maturation factor, beta                 | 1.489 | 38.68 | 0.41502 | 6898 P  | -1.393 | 0.51  | 0.01802 | 768   |
| Mtap2         | A_52_P1068259 | AK048375           | microtubule-associated protein 2             | 1.489 | 49.93 | 0.55565 | 11604 P | 1.15   | 6.98  | 0.09767 | 3056  |
| Tm6sf1        | A_52_P237948  | NM_145375          | transmembrane 6 superfamily member 1         | 1.489 | 12.21 | 0.1821  | 1653 P  | 1.035  | 30.75 | 0.46036 | 8102  |
| Glp1r         | A_51_P275077  | NM_021332          | glucagon-like peptide 1 receptor             | 1.488 | 20.94 | 0.25155 | 2818 P  | 1.061  | 19.02 | 0.23172 | 5377  |
| Sdccag1       | A_52_P561170  | AK041450           | serologically defined colon cancer antigen   | 1.488 | 20.94 | 0.2826  | 2984 M  | 1.068  | 19.02 | 0.33564 | 6741  |
| 2310022K01Rik | A_51_P124008  | AK009476           | RIKEN cDNA 2310022K01 gene                   | 1.487 | 31.88 | 0.34672 | 5046 P  | 1.197  | 5.75  | 0.11298 | 3338  |
| Myt1l         | A_52_P639028  | AK049967           | myelin transcription factor 1-like           | 1.487 | 25.79 | 0.28089 | 3460 P  | 1.008  | 42.43 | 0.90281 | 12121 |
| Ctss          | A_51_P423981  | NM_021281          | cathepsin S                                  | 1.486 | 25.79 | 0.29875 | 3816 P  | 1.051  | 33.49 | 0.68926 | 10234 |
| Colec12       | A_52_P527625  | NM_130449          | collectin sub-family member 12               | 1.485 | 28.61 | 0.3245  | 4493 P  | 1.359  | 1.32  | 0.02536 | 1045  |
| Fem1a         | A_52_P225592  | AK005979           | feminization 1 homolog a (C. elegans)        | 1.485 | 25.79 | 0.24428 | 2575 M  | -1.042 | 42.43 | 0.34537 | 6825  |
| Serpinc1      | A_52_P409746  | NM_080844          | serine (or cysteine) peptidase inhibitor, cl | 1.483 | 31.88 | 0.36607 | 5517 P  | 1.012  | 42.43 | 0.83453 | 11489 |
| Eln           | A_52_P609972  | NM_007925          | elastin                                      | 1.482 | 28.61 | 0.32851 | 4628 P  | 1.035  | 42.43 | 0.89691 | 12028 |
| Spats2        | A_52_P231453  | NM_139140          | spermatogenesis associated, serine-rich 2    | 1.482 | 8.15  | 0.15116 | 1253 P  | 1.03   | 36.07 | 0.62314 | 9651  |
| Gdf15         | A_52_P532982  | NM_011819          | growth differentiation factor 15             | 1.481 | 12.21 | 0.18106 | 1637 P  | -1.009 | 49.48 | 0.84369 | 11550 |
| Opa1          | A_52_P153645  | AK053861           | optic atrophy 1 homolog (human)              | 1.481 | 12.21 | 0.2794  | 2927 M  | 1.122  | 5.75  | 0.04735 | 1774  |
| Ngfr          | A_52_P236448  | NM_033217          | nerve growth factor receptor (TNFR super     | 1.478 | 65.79 | 0.70132 | 18447 P | 1.263  | 6.98  | 0.20651 | 4995  |
| Mnt           | A_52_P477431  | NM_010813          | max binding protein                          | 1.477 | 28.61 | 0.32851 | 4626 P  | 1.037  | 30.75 | 0.52956 | 8828  |
| Clec14a       | A_52_P566665  | NM_025809          | C-type lectin domain family 14, member a     | 1.476 | 35.45 | 0.37674 | 5810 P  | -1.01  | 49.48 | 0.82227 | 11390 |
| Exosc8        | A_51_P500806  | AK047257           | exosome component 8                          | 1.476 |       | 0.61745 | 7865 A  | -1.093 | 16.2  | 0.12533 | 3610  |
| Pmp22         | A_51_P258529  | NM_008885          | peripheral myelin protein                    | 1.476 | 20.94 | 0.24458 | 2689 P  | 1.081  | 25.31 | 0.53909 | 8932  |
| Hsd3b7        | A_51_P435911  | NM_133943          | hydroxy-delta-5-steroid dehydrogenase, 3     | 1.474 | 16.01 | 0.208   | 2035 P  | 1.213  | 3.82  | 0.07272 | 2463  |
| Snap91        | A_51_P311199  | NM_013669          | synaptosomal-associated protein 91           | 1.471 | 31.88 | 0.3333  | 4753 P  | -1.061 | 38.4  | 0.35146 | 6896  |
| Abcc9         | A_51_P328850  | NM_021041          | ATP-binding cassette, sub-family C (CFTR/    | 1.469 | 38.68 | 0.42256 | 7127 P  | 1.076  | 22.1  | 0.41314 | 7656  |
| Bambi         | A_51_P248819  | NM_026505          | BMP and activin membrane-bound inhibi        | 1.469 | 18.5  | 0.23102 | 2395 P  | 1.025  | 36.07 | 0.59225 | 9356  |
| Gpx3          | A_51_P292008  | NM_008161          | glutathione peroxidase 3                     | 1.469 | 31.88 | 0.41931 | 5804 M  | 1.516  | 0.24  | 0.00897 | 325   |
| Zwint         | A_51_P163378  | ENSMUST00000020081 | ZW10 interactor                              | 1.469 | 13.61 | 0.2912  | 3063 M  | 1.225  | 4.63  | 0.08702 | 2820  |
| Rtn3          | A_52_P218009  | AK053372           | reticulon 3                                  | 1.468 | 10.33 | 0.16317 | 1403 P  | 1.187  | 3.01  | 0.0225  | 960   |
| Ttc21b        | A_51_P221176  | AK010712           | tetratricopeptide repeat domain 21B          | 1.468 |       | 0.30248 | 3213 A  | 1.06   | 19.02 | 0.25294 | 5695  |
| Creb3l4       | A_51_P497882  | NM_030080          | cAMP responsive element binding protein      | 1.466 | 61.79 | 0.6784  | 17373 P | 1.079  | 16.2  | 0.24977 | 5636  |
| Apoa2         | A_51_P128973  | NM_013474          | apolipoprotein A-II                          | 1.465 | 53.87 | 0.59193 | 13030 P | -1.053 | 38.4  | 0.27714 | 6056  |
| Cda           | A_52_P469502  | NM_028176          | cytidine deaminase                           | 1.465 | 45.92 | 0.49339 | 9374 P  | -1.042 | 40.63 | 0.32279 | 6593  |
| D630045J12Rik | A_51_P363214  | XM_974678          | RIKEN cDNA D630045J12 gene                   | 1.465 | 10.33 | 0.17066 | 1502 P  | 1.075  | 16.2  | 0.21909 | 5192  |
| Rab22a        | A_51_P369106  | NM_024436          | RAB22A, member RAS oncogene family           | 1.464 | 28.61 | 0.31761 | 4310 P  | -1.063 | 33.49 | 0.26039 | 5817  |
| Scly          | A_51_P133369  | NM_016717          | selenocysteine lyase                         | 1.464 | 38.68 | 0.40754 | 6658 P  | 1.218  | 5.75  | 0.11617 | 3400  |
| 2410016F19Rik | A_52_P627793  | NM_026113          | RIKEN cDNA 2410016F19 gene                   | 1.462 | 28.61 | 0.32561 | 4518 P  | -1.128 | 3.82  | 0.04333 | 1624  |
| 4921533L14Rik | A_51_P402480  | AK173166           | RIKEN cDNA 4921533L14 gene                   | 1.462 | 25.79 | 0.28682 | 3540 P  | 1.054  | 30.75 | 0.66173 | 9986  |
| Atp5f1        | A_52_P631514  | AK081249           | ATP synthase, H+ transporting, mitochon      | 1.462 | 45.92 | 0.48921 | 9214 P  | 1.015  | 42.43 | 0.80391 | 11208 |
| Brp44l        | A_52_P595687  | NM_018819          | brain protein 44-like                        | 1.462 | 10.33 | 0.1677  | 1466 P  | 1.096  | 11.33 | 0.11452 | 3375  |
| Myo1d         | A_52_P211737  | NM_177390          | myosin ID                                    | 1.462 | 53.87 | 0.59251 | 13045 P | -1.184 | 1.18  | 0.02085 | 890   |
| Txn14b        | A_51_P286327  | NM_175646          | thioredoxin-like 4B                          | 1.461 | 9.39  | 0.16251 | 1376 P  | 1.035  | 30.75 | 0.43834 | 7905  |
| 0610037D15Rik | A_51_P321405  | NM_026714          | RIKEN cDNA 0610037D15 gene                   | 1.46  | 35.45 | 0.37183 | 5657 P  | -1.079 | 33.49 | 0.37093 | 7183  |
| Aco1          | A_52_P299115  | NM_007386          | aconitase 1                                  | 1.46  | 20.94 | 0.24913 | 2775 P  | 1.117  | 8.32  | 0.07158 | 2426  |
| Egfr          | A_52_P5855    | AK049452           | epidermal growth factor receptor             | 1.46  | 10.33 | 0.26547 | 2639 M  | 1.105  | 9.71  | 0.0911  | 2924  |
| Sst           | A_51_P262489  | NM_009215          | somatostatin                                 | 1.459 | 65.79 | 0.74533 | 15928 M | 1.109  | 16.2  | 0.35439 | 6946  |

|               |               |                    |                                               |       |       |         |         |        |       |         |       |
|---------------|---------------|--------------------|-----------------------------------------------|-------|-------|---------|---------|--------|-------|---------|-------|
| Wdr33         | A_52_P438682  | BC064745           | WD repeat domain 33                           | 1.459 | 20.94 | 0.23776 | 2494 P  | -1.053 | 42.43 | 0.43315 | 7877  |
| 5730601F06Rik | A_52_P722599  | XM_977869          | RIKEN cDNA 5730601F06 gene                    | 1.458 | 31.88 | 0.3531  | 5186 P  | -1.064 | 40.63 | 0.41314 | 7657  |
| Arhgef18      | A_51_P400490  | AK041423           | rho/rac guanine nucleotide exchange factor    | 1.458 |       | 0.75317 | 9315 A  | 1.158  | 5.75  | 0.07263 | 2456  |
| Foxp4         | A_52_P307628  | NM_028767          | forkhead box P4                               | 1.458 | 38.68 | 0.42594 | 7236 P  | -1.057 | 36.07 | 0.28628 | 6179  |
| Slc37a4       | A_51_P385598  | NM_008063          | solute carrier family 37 (glucose-6-phospho)  | 1.458 | 10.84 | 0.17808 | 1610 P  | 1.118  | 9.71  | 0.1095  | 3252  |
| AW549877      | A_52_P102413  | NM_145930          | expressed sequence AW549877                   | 1.457 | 20.94 | 0.24026 | 2548 P  | 1.261  | 3.82  | 0.0814  | 2688  |
| Enah          | A_52_P282000  | AK020248           | enabled homolog (Drosophila)                  | 1.457 | 35.45 | 0.37686 | 5816 P  | 1.229  | 3.82  | 0.06513 | 2286  |
| Pgm5          | A_51_P451052  | NM_175013          | phosphoglucomutase 5                          | 1.457 | 61.79 | 0.66276 | 16699 P | 1.025  | 33.49 | 0.55128 | 9047  |
| Il1b          | A_51_P212782  | NM_008361          | interleukin 1 beta                            | 1.456 | 35.45 | 0.36307 | 5464 P  | 1.29   | 5.75  | 0.17839 | 4546  |
| Ociad2        | A_51_P338886  | NM_026950          | OClA domain containing 2                      | 1.456 | 18.5  | 0.23063 | 2367 P  | 1.108  | 8.32  | 0.07192 | 2432  |
| Psd           | A_51_P251205  | NM_028627          | pleckstrin and Sec7 domain containing         | 1.456 | 45.92 | 0.51629 | 8276 M  | -1.386 | 0.51  | 0.00584 | 28    |
| 9430079B08Rik | A_52_P625975  | AK035049           | RIKEN cDNA 9430079B08 gene                    | 1.455 | 10.84 | 0.18127 | 1643 P  | 1.009  | 42.43 | 0.90103 | 12105 |
| Fzd1          | A_52_P597634  | NM_021457          | frizzled homolog 1 (Drosophila)               | 1.455 | 16.01 | 0.21494 | 2120 P  | 1.071  | 16.2  | 0.20515 | 4975  |
| Uhmk1         | A_52_P614133  | AK028977           | U2AF homology motif (UHM) kinase 1            | 1.455 | 28.61 | 0.32081 | 4390 P  | 1.011  | 42.43 | 0.83151 | 11476 |
| Dpysl5        | A_51_P130719  | NM_023047          | dihydropyrimidinase-like 5                    | 1.452 | 42.28 | 0.46928 | 8160 M  | 1.016  | 42.43 | 0.83907 | 11518 |
| 0610016J10Rik | A_52_P94347   | AK033228           | mediator of cell motility 1                   | 1.451 | 53.87 | 0.43241 | 7147 M  | 1.105  | 8.32  | 0.06523 | 2297  |
| Fstl1         | A_51_P215106  | NM_008047          | folliculin-like 1                             | 1.451 | 28.61 | 0.30934 | 4147 P  | 1.008  | 42.43 | 0.86776 | 11740 |
| Kcnn2         | A_51_P309854  | NM_080465          | potassium intermediate/small conductance      | 1.451 | 23.47 | 0.26004 | 2997 P  | 1.095  | 22.1  | 0.52549 | 8803  |
| Hint3         | A_51_P290819  | NM_025798          | histidine triad nucleotide binding protein    | 1.449 | 13.61 | 0.19306 | 1852 P  | -1.007 | 49.48 | 0.89284 | 11989 |
| Rtn4          | A_52_P379337  | NM_194054          | reticulum 4                                   | 1.449 | 20.94 | 0.24841 | 2764 P  | 1.241  | 2.53  | 0.03311 | 1294  |
| BC019943      | A_51_P300960  | NM_144927          | cDNA sequence BC019943                        | 1.448 | 16.01 | 0.20511 | 2013 P  | 1.037  | 30.75 | 0.51414 | 8715  |
| Hoxb2         | A_51_P257789  | AK036636           | homeo box B2                                  | 1.448 | 35.45 | 0.38302 | 5994 P  | 1.045  | 25.31 | 0.30884 | 6426  |
| Pask          | A_51_P223709  | NM_080850          | PAS domain containing serine/threonine        | 1.448 | 23.47 | 0.27116 | 3173 P  | -1.024 | 48.39 | 0.704   | 10347 |
| Ndubf4        | A_51_P434269  | NM_026610          | NADH dehydrogenase (ubiquinone) 1 beta        | 1.447 | 31.88 | 0.33757 | 4282 M  | 1.036  | 30.75 | 0.53168 | 8855  |
| Tbpl1         | A_51_P387690  | AK028621           | TATA box binding protein-like 1               | 1.446 | 45.92 | 0.49546 | 9452 P  | 1.182  | 4.63  | 0.06742 | 2348  |
| Prim2         | A_52_P1115939 | AK047274           |                                               | 1.444 |       | 0.57069 | 9393 A  | 1.007  | 42.43 | 0.94617 | 12554 |
| Rabgap1l      | A_52_P506529  | NM_001038621       | RAB GTPase activating protein 1-like          | 1.442 | 23.47 | 0.27514 | 3314 P  | 1.05   | 22.1  | 0.26529 | 5877  |
| Golph3        | A_52_P244162  | BC031445           | golgi phosphoprotein 3                        | 1.441 | 35.45 | 0.36552 | 5509 P  | 1      | 49.48 | 0.99571 | 13015 |
| Il12b         | A_51_P385812  | NM_008352          | interleukin 12b                               | 1.441 | 49.93 | 0.52633 | 9250 M  | -1.183 | 2.04  | 0.03933 | 1492  |
| E2f3          | A_52_P583458  | BC059262           | E2F transcription factor 3                    | 1.44  | 25.79 | 0.28104 | 3466 P  | -1.106 | 4.63  | 0.05224 | 1930  |
| Gpld1         | A_51_P402583  | NM_008156          | glycosylphosphatidylinositol specific phospho | 1.44  | 18.5  | 0.22953 | 2330 P  | 1.062  | 25.31 | 0.48291 | 8359  |
| Prkcn         | A_52_P94495   | AK050059           | protein kinase C, nu                          | 1.439 |       | 0.31447 | 3475 A  | 1.065  | 19.02 | 0.23133 | 5368  |
| Mrpl15        | A_52_P190506  | AK017820           |                                               | 1.438 | 49.93 | 0.51432 | 10098 P | 1.115  | 9.71  | 0.13892 | 3818  |
| Cacna1h       | A_52_P588378  | AB041801           | calcium channel, voltage-dependent, T type    | 1.436 | 53.87 | 0.45481 | 5871 M  | -1.076 | 25.31 | 0.16629 | 4319  |
| Tyrobp        | A_51_P261517  | NM_011662          | TYRO protein tyrosine kinase binding protein  | 1.435 | 38.68 | 0.42094 | 7072 P  | -1.196 | 1.62  | 0.04061 | 1545  |
| Islr          | A_51_P140742  | NM_012043          | immunoglobulin superfamily containing leucine | 1.434 | 31.88 | 0.34722 | 5054 P  | 1.116  | 8.32  | 0.09218 | 2947  |
| Sema6d        | A_51_P415755  | AK052232           | sema domain, transmembrane domain (T          | 1.434 | 38.68 | 0.41089 | 6769 P  | 1.142  | 5.75  | 0.06227 | 2202  |
| Rhot1         | A_52_P655239  | AK043323           | ras homolog gene family, member T1            | 1.433 | 18.5  | 0.2301  | 2360 P  | 1.104  | 8.32  | 0.07994 | 2652  |
| Sepw1         | A_51_P474078  | NM_009156          | selenoprotein W, muscle 1                     | 1.433 | 28.61 | 0.39052 | 5124 M  | -1.003 | 49.48 | 0.9608  | 12670 |
| Zfp521        | A_51_P214985  | NM_145492          | zinc finger protein 521                       | 1.433 | 49.93 | 0.51764 | 10227 P | -1.002 | 49.48 | 0.97673 | 12812 |
| Impa1         | A_52_P13537   | NM_018864          | inositol (myo)-1(or 4)-monophosphatase        | 1.431 | 16.01 | 0.30923 | 3447 M  | 1.182  | 6.98  | 0.14231 | 3890  |
| Mmp2          | A_51_P341736  | NM_008610          | matrix metalloproteinase 2                    | 1.431 | 35.45 | 0.37331 | 5699 P  | 1.003  | 42.43 | 0.96168 | 12680 |
| Nqo2          | A_52_P35581   | ENSMUST00000058978 | NAD(P)H dehydrogenase, quinone 2              | 1.431 | 28.61 | 0.31826 | 4335 P  | -1.179 | 3.82  | 0.10297 | 3171  |
| Pdlim2        | A_51_P472726  | NM_145978          | PDZ and LIM domain 2                          | 1.431 | 35.45 | 0.37952 | 5902 P  | 1.06   | 19.02 | 0.23219 | 5382  |
| Gbf1          | A_52_P421716  | AK041959           | golgi-specific brefeldin A-resistance factor  | 1.43  | 49.93 | 0.46206 | 7961 P  | 1.025  | 36.07 | 0.5692  | 9415  |
| Slc30a9       | A_52_P134914  | AK033990           | solute carrier family 30 (zinc transporter),  | 1.43  | 8.15  | 0.16423 | 1419 P  | 1.001  | 42.43 | 0.98357 | 12901 |
| Rasd2         | A_51_P394631  | XM_204287          | RASD family, member 2                         | 1.429 | 38.68 | 0.4265  | 7251 P  | -1.003 | 49.48 | 0.94118 | 12493 |
| Esd           | A_52_P611000  | NM_016903          | esterase D/formylglutathione hydrolase        | 1.427 | 45.92 | 0.48893 | 9202 P  | 1.019  | 40.63 | 0.76694 | 10915 |
| 0610007N19Rik | A_52_P670812  | AK002304           | RIKEN cDNA 0610007N19 gene                    | 1.426 | 31.88 | 0.33423 | 4763 P  | -1.021 | 48.7  | 0.67865 | 10127 |
| Il10rb        | A_51_P344507  | AK018347           | interleukin 10 receptor, beta                 | 1.426 |       | 0.61003 | 9300 A  | 1.062  | 25.31 | 0.46693 | 8177  |
| Nrxn3         | A_52_P39644   | NM_172544          | neurexin III                                  | 1.426 | 25.79 | 0.27555 | 3202 M  | 1.123  | 13.58 | 0.2935  | 6264  |
| Acaa2         | A_51_P125260  | NM_177470          | acetyl-Coenzyme A acyltransferase 2 (mito     | 1.425 | 45.92 | 0.48984 | 9237 P  | -1.199 | 0.75  | 0.01251 | 509   |
| Hsbp1         | A_52_P544555  | NM_024219          | heat shock factor binding protein 1           | 1.425 | 38.68 | 0.41119 | 6796 P  | 1.162  | 3.82  | 0.03605 | 1399  |



|               |               |           |                                              |       |       |         |         |        |       |         |       |
|---------------|---------------|-----------|----------------------------------------------|-------|-------|---------|---------|--------|-------|---------|-------|
| Lama2         | A_52_P652859  | NM_008481 | laminin, alpha 2                             | 1.424 | 49.93 | 0.50268 | 9753 P  | 1.124  | 8.32  | 0.08715 | 2823  |
| Prkar2b       | A_51_P221062  | NM_011158 | protein kinase, cAMP dependent regulato      | 1.422 | 20.94 | 0.28561 | 3414 P  | 1.388  | 0.24  | 0.00623 | 130   |
| Rab6          | A_51_P209873  | NM_024287 | RAB6, member RAS oncogene family             | 1.422 | 23.47 | 0.27264 | 3235 P  | 1.44   | 0.24  | 0.00638 | 176   |
| Sdpr          | A_51_P277336  | NM_138741 | serum deprivation response                   | 1.421 | 28.61 | 0.31826 | 4342 P  | -1.029 | 46.85 | 0.62301 | 9645  |
| 2410022L05Rik | A_51_P357422  | NM_025556 | RIKEN cDNA 2410022L05 gene                   | 1.42  | 10.84 | 0.1859  | 1722 P  | 1.062  | 33.49 | 0.73801 | 10663 |
| Ctgf          | A_51_P157042  | NM_010217 | connective tissue growth factor              | 1.42  | 35.45 | 0.4813  | 8240 P  | -1.027 | 48.39 | 0.74343 | 10735 |
| Perp          | A_51_P317941  | NM_022032 | PERP, TP53 apoptosis effector                | 1.42  | 45.92 | 0.49127 | 9268 P  | 1.05   | 25.31 | 0.39393 | 7450  |
| 5730437N04Rik | A_51_P411389  | NM_027457 | RIKEN cDNA 5730437N04 gene                   | 1.419 | 38.68 | 0.42074 | 7054 P  | -1.022 | 47.92 | 0.62058 | 9629  |
| Adrb3         | A_51_P179442  | AF193027  | adrenergic receptor, beta 3                  | 1.419 |       | 0.35185 | 4802 A  | 1.095  | 9.71  | 0.08605 | 2792  |
| Eif4ebp1      | A_51_P330428  | NM_007918 | eukaryotic translation initiation factor 4E  | 1.419 | 23.47 | 0.26479 | 3065 P  | 1.037  | 28.13 | 0.41015 | 7611  |
| Fdxr          | A_51_P461578  | NM_007997 | ferredoxin reductase                         | 1.419 | 35.45 | 0.38472 | 6025 P  | -1.166 | 1.18  | 0.01679 | 724   |
| Dsp           | A_51_P101460  | AK077574  | desmoplakin                                  | 1.418 | 23.47 | 0.26547 | 3071 P  | 1.548  | 0.3   | 0.01444 | 610   |
| Rph3a         | A_52_P211949  | NM_011286 | rabphilin 3A                                 | 1.418 | 16.01 | 0.4374  | 5467 M  | -1.111 | 9.71  | 0.08874 | 2861  |
| 2410129H14Rik | A_52_P644972  | NM_175245 | RIKEN cDNA 2410129H14 gene                   | 1.417 | 57.76 | 0.59334 | 13079 P | 1.196  | 3.82  | 0.06038 | 2159  |
| Gtf2h2        | A_52_P291509  | BC016231  | general transcription factor II H, polypept  | 1.417 | 20.94 | 0.24498 | 2707 P  | 1.01   | 42.43 | 0.48879 | 11443 |
| 2610528K11Rik | A_51_P364391  | NM_175184 | RIKEN cDNA 2610528K11 gene                   | 1.416 | 28.61 | 0.31768 | 4320 P  | 1.023  | 38.4  | 0.64811 | 9866  |
| 8430419K02Rik | A_51_P212012  | BC050140  | RIKEN cDNA 8430419K02 gene                   | 1.416 |       | 0.31599 | 3937 A  | -1.173 | 1.58  | 0.02536 | 1052  |
| Cbx5          | A_52_P544760  | NM_007626 | chromobox homolog 5 (Drosophila HP1a)        | 1.416 | 31.88 | 0.33775 | 4885 P  | 1.16   | 8.32  | 0.15188 | 4062  |
| Dock8         | A_51_P331886  | AK038316  | dedicator of cytokinesis 8                   | 1.416 | 25.79 | 0.26547 | 2987 M  | -1.003 | 49.48 | 0.9532  | 12607 |
| Rpl22         | A_52_P391718  | NM_009079 | ribosomal protein L22                        | 1.416 | 13.61 | 0.20532 | 2017 P  | 1.152  | 11.33 | 0.30021 | 6320  |
| Usp11         | A_51_P315673  | NM_145628 | ubiquitin specific peptidase 11              | 1.416 | 16.01 | 0.21984 | 2201 P  | 1.303  | 1.62  | 0.02494 | 1033  |
| Crsp6         | A_51_P429951  | NM_144933 | cofactor required for Sp1 transcriptional a  | 1.415 | 23.47 | 0.29034 | 3094 M  | -1.056 | 42.43 | 0.43364 | 7884  |
| Mpv17l        | A_51_P352738  | NM_033564 | Mpv17 transgene, kidney disease mutant       | 1.415 | 28.61 | 0.31256 | 4208 P  | -1.05  | 40.63 | 0.34362 | 6803  |
| Fbn1          | A_51_P467224  | NM_007993 | fibrillin 1                                  | 1.414 | 49.93 | 0.5298  | 10741 P | 1.055  | 25.31 | 0.4147  | 7673  |
| Mcm4          | A_52_P231545  | AK083618  | minichromosome maintenance deficient         | 1.414 |       | 0.50108 | 6572 A  | 1.024  | 36.07 | 0.64644 | 9859  |
| Apoc3         | A_52_P574306  | NM_023114 | apolipoprotein C-III                         | 1.412 | 61.79 | 0.64601 | 15933 P | 1.181  | 3.82  | 0.04159 | 1572  |
| Cox6c         | A_51_P343323  | NM_053071 | cytochrome c oxidase, subunit VIc            | 1.412 | 12.21 | 0.19102 | 1819 P  | 1.02   | 38.4  | 0.68432 | 10185 |
| Foxn2         | A_52_P431139  | NM_180974 | forkhead box N2                              | 1.412 |       | 0.49749 | 6489 A  | 1.144  | 5.75  | 0.05529 | 2014  |
| Pigk          | A_51_P197175  | NM_178016 | phosphatidylinositol glycan anchor biosyn    | 1.412 | 49.93 | 0.49841 | 9594 P  | 1.01   | 42.43 | 0.90099 | 12101 |
| Slc39a10      | A_51_P223498  | NM_172653 | solute carrier family 39 (zinc transporter), | 1.412 | 12.21 | 0.19672 | 1887 P  | -1.071 | 42.43 | 0.51228 | 8696  |
| Xrcc2         | A_52_P510694  | AK085093  | X-ray repair complementing defective rep     | 1.412 |       | 0.78047 | 9884 A  | -2.015 | 0     | 0.00584 | 68    |
| Utrn          | A_52_P504624  | AK020881  | utrophin                                     | 1.411 |       | 0.6625  | 8968 A  | 1.08   | 19.02 | 0.40651 | 7583  |
| 1300018I05Rik | A_51_P223177  | NM_028791 | RIKEN cDNA 1300018I05 gene                   | 1.409 | 35.45 | 0.37783 | 5874 P  | -1.028 | 47.43 | 0.65627 | 9940  |
| Acly          | A_51_P261718  | NM_134037 | ATP citrate lyase                            | 1.408 | 10.84 | 0.2154  | 2071 P  | 1.562  | 0.24  | 0.01141 | 443   |
| Mmd2          | A_51_P257885  | NM_175217 | monocyte to macrophage differentiation-      | 1.408 | 31.88 | 0.32851 | 4603 P  | 1.015  | 42.43 | 0.77883 | 10973 |
| Myl7          | A_51_P246345  | NM_022879 | myosin, light polypeptide 7, regulatory      | 1.408 | 49.93 | 0.53335 | 10825 P | 1.063  | 13.58 | 0.16598 | 4314  |
| Atcay         | A_51_P209697  | NM_178662 | ataxia, cerebellar, Cayman type homolog      | 1.407 | 42.28 | 0.44606 | 7835 P  | 1.074  | 19.02 | 0.30864 | 6424  |
| B430316J06Rik | A_52_P1027808 | AK046698  | RIKEN cDNA B430316J06 gene                   | 1.407 | 28.61 | 0.30999 | 4160 P  | -1.057 | 45.05 | 0.68459 | 10188 |
| Lmna          | A_52_P137765  | NM_019390 | lamin A                                      | 1.407 | 69.29 | 0.76648 | 22003 P | 1.157  | 8.32  | 0.1238  | 3576  |
| Npm1          | A_51_P467410  | NM_008722 | nucleophosmin 1                              | 1.407 | 23.47 | 0.35984 | 4520 M  | 1.155  | 9.71  | 0.17956 | 4567  |
| Serpinb12     | A_51_P518909  | NM_027971 | serine (or cysteine) peptidase inhibitor, cl | 1.407 |       | 0.54386 | 7563 A  | -1.256 | 0.51  | 0.00809 | 306   |
| Thbs2         | A_51_P461877  | NM_011581 | thrombospondin 2                             | 1.407 |       | 0.6654  | 9036 A  | -1.163 | 1.32  | 0.02087 | 893   |
| Fads1         | A_51_P358112  | NM_146094 | fatty acid desaturase 1                      | 1.406 | 31.88 | 0.33299 | 4738 P  | -1.009 | 49.48 | 0.88372 | 11903 |
| Tekt2         | A_51_P109933  | NM_011902 | tektin 2                                     | 1.405 | 84.52 | 0.52245 | 9133 P  | 1.019  | 40.63 | 0.71928 | 10485 |
| 0610010O12Rik | A_52_P227937  | BC028765  | RIKEN cDNA 0610010O12 gene                   | 1.404 | 31.88 | 0.33231 | 4706 P  | 1.207  | 3.82  | 0.05681 | 2053  |
| Cetn3         | A_51_P229105  | NM_007684 | centrin 3                                    | 1.403 | 42.28 | 0.45789 | 8133 P  | -1.12  | 6.98  | 0.07614 | 2558  |
| E030003F13Rik | A_52_P113672  | BB529627  | RIKEN cDNA E030003F13 gene                   | 1.403 | 38.68 | 0.39107 | 6202 P  | 1.113  | 9.71  | 0.10424 | 3190  |
| Snx5          | A_51_P134844  | NM_024225 | sorting nexin 5                              | 1.403 | 23.47 | 0.27361 | 3281 P  | 1.166  | 3.82  | 0.03166 | 1245  |
| 3222402P14Rik | A_51_P270960  | BC031532  | RIKEN cDNA 3222402P14 gene                   | 1.402 | 25.79 | 0.28718 | 3556 P  | 1.403  | 0.24  | 0.00731 | 247   |
| Gnptg         | A_51_P491017  | AK078230  | N-acetylglucosamine-1-phosphotransfera       | 1.402 | 25.79 | 0.29583 | 3713 P  | 1.078  | 13.58 | 0.15508 | 4134  |
| Ndrgr2        | A_51_P176352  | NM_013864 | N-myc downstream regulated gene 2            | 1.402 | 57.76 | 0.61456 | 14141 P | 1.081  | 11.33 | 0.12856 | 3667  |
| Plcb1         | A_52_P18262   | BC058710  | phospholipase C, beta 1                      | 1.402 | 25.79 | 0.27669 | 3346 P  | 1.245  | 1.17  | 0.00965 | 349   |
| Plscr4        | A_52_P671794  | NM_178711 | phospholipid scramblase 4                    | 1.402 | 45.92 | 0.4813  | 8980 P  | -1.118 | 11.33 | 0.1445  | 3932  |

|               |               |              |                                                                        |       |       |         |         |        |       |         |       |
|---------------|---------------|--------------|------------------------------------------------------------------------|-------|-------|---------|---------|--------|-------|---------|-------|
| Phgdh         | A_51_P408729  | NM_016966    | 3-phosphoglycerate dehydrogenase                                       | 1.401 | 13.61 | 0.20804 | 2039 P  | -1.018 | 49.48 | 0.78083 | 10999 |
| 1110031B06Rik | A_52_P231079  | NM_144521    | RIKEN cDNA 1110031B06 gene                                             | 1.4   | 25.79 | 0.29119 | 3644 P  | 1.034  | 30.75 | 0.44499 | 7960  |
| Baz2a         | A_52_P191135  | AK035400     | bromodomain adjacent to zinc finger domain 2                           | 1.4   | 28.61 | 0.32122 | 4409 P  | 1.084  | 25.31 | 0.5677  | 9183  |
| Cyp3a11       | A_51_P355301  | NM_007818    | cytochrome P450, family 3, subfamily a, polypeptide 11                 | 1.4   | 75.14 | 0.84186 | 27211 P | 1.022  | 38.4  | 0.73869 | 10673 |
| Rtn1          | A_52_P424959  | NM_153457    | reticulum 1                                                            | 1.4   | 53.87 | 0.57306 | 12138 P | 1.073  | 19.02 | 0.35084 | 6885  |
| Hoxb9         | A_52_P973575  | NM_008270    | homeo box B9                                                           | 1.399 | 28.61 | 0.29875 | 3808 P  | 1.017  | 42.43 | 0.85845 | 11667 |
| Unc5c         | A_52_P380301  | NM_009472    | unc-5 homolog C (C. elegans)                                           | 1.399 | 35.45 | 0.37449 | 5726 P  | 1.193  | 4.63  | 0.06275 | 2223  |
| Hebp2         | A_51_P159612  | NM_019487    | heme binding protein 2                                                 | 1.398 | 61.79 | 0.65765 | 16468 P | -1.031 | 49.22 | 0.8213  | 11375 |
| Myh10         | A_52_P680681  | NM_175260    | myosin, heavy polypeptide 10, non-muscle                               | 1.398 | 28.61 | 0.32311 | 4442 P  | 1.681  | 0     | 0.00584 | 9     |
| Fbxo21        | A_52_P184145  | NM_145564    | F-box protein 21                                                       | 1.396 | 23.47 | 0.27194 | 3212 P  | -1.276 | 0.51  | 0.01023 | 385   |
| Rhob          | A_52_P89567   | NM_007483    | ras homolog gene family, member B                                      | 1.396 | 31.88 | 0.34185 | 4961 P  | 1.14   | 11.33 | 0.29228 | 6240  |
| 2900011O08Rik | A_51_P264656  | NM_144518    | RIKEN cDNA 2900011O08 gene                                             | 1.395 | 75.14 | 0.81009 | 24700 P | 1.041  | 28.13 | 0.42548 | 7783  |
| Ifit3         | A_52_P663686  | AK077243     | similar to interferon-induced protein with tetratricopeptide repeats 3 | 1.395 | 53.87 | 0.58129 | 12619 P | 1.008  | 42.43 | 0.88348 | 11898 |
| Tbxas1        | A_51_P448664  | NM_011539    | thromboxane A synthase 1, platelet                                     | 1.395 | 23.47 | 0.26814 | 3119 P  | 1.01   | 42.43 | 0.81997 | 11358 |
| A630018P17Rik | A_51_P162564  | NM_001007577 | RIKEN cDNA A630018P17 gene                                             | 1.394 | 53.87 | 0.55785 | 11672 P | 1.099  | 16.2  | 0.31551 | 6531  |
| Col6a1        | A_51_P474496  | NM_009933    | procollagen, type VI, alpha 1                                          | 1.394 | 35.45 | 0.35722 | 5320 P  | 1.006  | 42.43 | 0.89053 | 11967 |
| Edn3          | A_52_P20753   | NM_007903    | endothelin 3                                                           | 1.394 | 49.93 | 0.51279 | 10050 P | 1.048  | 30.75 | 0.59423 | 9379  |
| Pdk4          | A_51_P350453  | NM_013743    | pyruvate dehydrogenase kinase, isoenzyme 4                             | 1.394 | 53.87 | 0.60815 | 10948 M | -1.091 | 25.31 | 0.24747 | 5609  |
| Rab3b         | A_52_P339959  | NM_023537    | RAB3B, member RAS oncogene family                                      | 1.394 | 53.87 | 0.54536 | 11214 P | 1.135  | 8.32  | 0.09166 | 2935  |
| Cnot4         | A_52_P795551  | AK079480     | cellular note 4                                                        | 1.393 |       | 0.59916 | 9020 A  | -1.069 | 25.31 | 0.16463 | 4289  |
| Park7         | A_51_P229852  | NM_020569    | Parkinson disease (autosomal recessive, early-onset) 7                 | 1.393 | 12.21 | 0.27794 | 2994 M  | -1.011 | 49.48 | 0.87471 | 11811 |
| Ppara         | A_51_P348334  | NM_011144    | peroxisome proliferator activated receptor alpha                       | 1.393 |       | 0.61088 | 9333 A  | -1.027 | 45.68 | 0.52732 | 8817  |
| Pcsk1         | A_52_P164524  | NM_013628    | proprotein convertase subtilisin/kexin type 1                          | 1.392 | 10.33 | 0.19103 | 1822 P  | 1.103  | 11.33 | 0.1615  | 4245  |
| Psmc2         | A_51_P108701  | NM_011188    | proteasome (prosome, macropain) 26S subunit type 2                     | 1.392 | 23.47 | 0.26119 | 3011 P  | 1.166  | 3.82  | 0.03916 | 1486  |
| Rprm          | A_52_P627967  | NM_023396    | reprimin 1, TP53 dependent G2 arrest mediator                          | 1.392 | 35.45 | 0.37154 | 5654 P  | -1.162 | 1.58  | 0.02249 | 950   |
| Aldh7a1       | A_51_P470414  | NM_138600    | aldehyde dehydrogenase family 7, member 1                              | 1.391 | 38.68 | 0.40754 | 6657 P  | -1.193 | 1.58  | 0.02906 | 1171  |
| Pabpc1        | A_52_P204023  | AK005009     | poly A binding protein, cytoplasmic 1                                  | 1.391 | 28.61 | 0.31692 | 4290 P  | 1.074  | 19.02 | 0.34767 | 6845  |
| 2610030H06Rik | A_52_P224373  | BC028317     | RIKEN cDNA 2610030H06 gene                                             | 1.39  | 20.94 | 0.25357 | 2880 P  | -1.019 | 49.22 | 0.71961 | 10495 |
| Mrpl49        | A_52_P485433  | NM_026246    | mitochondrial ribosomal protein L49                                    | 1.39  | 28.61 | 0.30876 | 4126 P  | -1.01  | 49.48 | 0.81205 | 11297 |
| Neo1          | A_52_P269003  | NM_008684    | neogenin                                                               | 1.39  | 12.21 | 0.20104 | 1960 P  | 1.242  | 1.62  | 0.01565 | 668   |
| Il6           | A_51_P217218  | NM_031168    | interleukin 6                                                          | 1.389 | 72.2  | 0.80326 | 24270 P | 1.142  | 19.02 | 0.53987 | 8942  |
| Rps28         | A_51_P335671  | CA467389     | ribosomal protein S28                                                  | 1.389 | 18.5  | 0.33753 | 4051 M  | -1.036 | 45.05 | 0.53126 | 8846  |
| Ctsl          | A_51_P253547  | NM_009984    | cathepsin L                                                            | 1.388 | 31.88 | 0.34941 | 5107 P  | 1.111  | 9.71  | 0.11009 | 3270  |
| 5730420B22Rik | A_51_P411264  | NM_172597    | RIKEN cDNA 5730420B22 gene                                             | 1.387 | 20.94 | 0.25495 | 2916 P  | 1      | 42.43 | 0.99997 | 13054 |
| Ndufa4        | A_52_P552832  | NM_010886    | NADH dehydrogenase (ubiquinone) 1 alpha subunit                        | 1.387 | 38.68 | 0.41052 | 6758 P  | 1.213  | 3.46  | 0.04581 | 1715  |
| Pbx3          | A_52_P406028  | AK086310     | pre B-cell leukemia transcription factor 3                             | 1.387 |       | 0.51629 | 6912 A  | 1.117  | 6.98  | 0.05908 | 2108  |
| Pdcd6ip       | A_52_P188975  | NM_011052    | programmed cell death 6 interacting protein                            | 1.387 | 16.01 | 0.22227 | 2239 P  | 1.232  | 2.04  | 0.01985 | 846   |
| Foxa3         | A_52_P64707   | NM_008260    | forkhead box A3                                                        | 1.386 | 31.88 | 0.3356  | 4790 P  | 1.097  | 11.33 | 0.11899 | 3467  |
| Gli3          | A_51_P171288  | AK048009     | GLI-Kruppel family member GLI3                                         | 1.386 | 53.87 | 0.56612 | 11900 P | 1.105  | 8.32  | 0.07279 | 2474  |
| Rapgef1       | A_52_P203322  | NM_001039087 | Rap guanine nucleotide exchange factor (p115)                          | 1.386 | 65.79 | 0.49339 | 7788 M  | 1.087  | 9.71  | 0.09238 | 2954  |
| Sema5a        | A_52_P409076  | NM_009154    | sema domain, seven thrombospondin repeats                              | 1.386 | 38.68 | 0.39931 | 6501 P  | -1.073 | 40.63 | 0.45787 | 8076  |
| Kdelc2        | A_51_P501656  | NM_212445    | KDEL (Lys-Asp-Glu-Leu) containing 2                                    | 1.385 | 18.5  | 0.23742 | 2489 P  | 1.208  | 5.75  | 0.10699 | 3218  |
| Tuba6         | A_52_P503809  | NM_009448    | tubulin, alpha 1B                                                      | 1.385 | 25.79 | 0.29757 | 3757 P  | 1.053  | 28.13 | 0.51724 | 8734  |
| Hip1r         | A_51_P440460  | NM_145070    | huntingtin interacting protein 1 related                               | 1.384 | 12.21 | 0.20607 | 2022 P  | 1.023  | 36.07 | 0.61616 | 9592  |
| Tcp1          | A_52_P4271    | AK150666     | t-complex protein 1                                                    | 1.384 | 18.5  | 0.23595 | 2458 P  | 1.08   | 13.58 | 0.173   | 4425  |
| 1100001I22Rik | A_51_P243288  | NM_001005859 | ribosomal protein L34                                                  | 1.383 | 31.88 | 0.41848 | 5769 M  | -1.005 | 49.48 | 0.93057 | 12393 |
| Ccni          | A_52_P663349  | AK047232     | cyclin I                                                               | 1.383 | 79.26 | 0.37387 | 4749 M  | 1.152  | 5.75  | 0.07233 | 2448  |
| Fzd4          | A_51_P361220  | NM_008055    | frizzled homolog 4 (Drosophila)                                        | 1.383 | 53.87 | 0.55884 | 11698 P | -1.015 | 49.48 | 0.90792 | 12178 |
| Wasl          | A_52_P96782   | NM_028459    | Wiskott-Aldrich syndrome-like (human)                                  | 1.383 | 61.79 | 0.66117 | 16608 P | 1.271  | 3.01  | 0.06348 | 2247  |
| 3526401B18Rik | A_52_P1042732 | AK014386     | RIKEN cDNA 3526401B18 gene                                             | 1.382 | 65.79 | 0.68923 | 17883 P | -1.017 | 49.39 | 0.71279 | 10424 |
| Dhrs4         | A_51_P352381  | NM_030686    | dehydrogenase/reductase (SDR family) member 4                          | 1.382 | 42.28 | 0.44544 | 7802 P  | 1.064  | 25.31 | 0.49613 | 8530  |
| Gnai3         | A_51_P237695  | NM_010306    | guanine nucleotide binding protein, alpha 3                            | 1.382 | 23.47 | 0.29265 | 3548 P  | 1.227  | 3.01  | 0.04231 | 1592  |
| Vps35         | A_52_P235108  | NM_022997    | vacuolar protein sorting 35                                            | 1.382 | 38.68 | 0.39016 | 6179 P  | 1.053  | 30.75 | 0.6778  | 10118 |



|               |              |                    |                                            |       |       |         |         |        |       |         |       |
|---------------|--------------|--------------------|--------------------------------------------|-------|-------|---------|---------|--------|-------|---------|-------|
| Asgr2         | A_51_P484842 | NM_007493          | asialoglycoprotein receptor 2              | 1.381 | 45.92 | 0.45371 | 6681 M  | -1.112 | 5.75  | 0.0596  | 2137  |
| Hdc           | A_51_P254656 | NM_008230          | histidine decarboxylase                    | 1.381 | 53.87 | 0.57311 | 12147 P | 1.006  | 42.43 | 0.94631 | 10814 |
| Map3k5        | A_52_P656714 | NM_008580          | mitogen activated protein kinase kinase k  | 1.381 | 35.45 | 0.35734 | 5347 P  | 1.153  | 9.71  | 0.2268  | 5310  |
| Ahnak         | A_51_P365344 | NM_009643          | AHNAK nucleoprotein (desmoyokin)           | 1.38  | 31.88 | 0.33154 | 4700 P  | 1.017  | 40.63 | 0.7248  | 10521 |
| C330018D20Rik | A_52_P241725 | AK021208           | RIKEN cDNA C330018D20 gene                 | 1.38  | 31.88 | 0.32995 | 4667 P  | 1.133  | 5.75  | 0.04464 | 1663  |
| Xab1          | A_51_P234462 | NM_133756          | XPA binding protein 1                      | 1.379 | 28.61 | 0.32293 | 4437 P  | -1.073 | 22.1  | 0.14398 | 3921  |
| Acp1          | A_52_P432037 | NM_021330          | acid phosphatase 1, soluble                | 1.378 | 42.28 | 0.42411 | 7181 P  | 1.077  | 16.2  | 0.19813 | 4869  |
| Sgce          | A_52_P27864  | NM_011360          | sarcoglycan, epsilon                       | 1.378 | 38.68 | 0.40981 | 6728 P  | 1.117  | 9.71  | 0.15392 | 4113  |
| 1700020C11Rik | A_51_P175699 | NM_026443          | RIKEN cDNA 1700020C11 gene                 | 1.377 | 20.94 | 0.25808 | 2965 P  | 1.016  | 40.63 | 0.78944 | 11083 |
| Bcar1         | A_51_P375227 | NM_009954          | breast cancer anti-estrogen resistance 1   | 1.377 | 25.79 | 0.28009 | 3422 P  | 1.05   | 22.1  | 0.29717 | 6294  |
| Itpr1         | A_51_P269663 | NM_010585          | inositol 1,4,5-triphosphate receptor 1     | 1.377 | 31.88 | 0.42422 | 5966 M  | 1.086  | 13.58 | 0.17186 | 4405  |
| Apbb1         | A_51_P344249 | NM_009685          | amyloid beta (A4) precursor protein-bind   | 1.376 | 16.01 | 0.22462 | 2262 P  | 1.086  | 11.33 | 0.11364 | 3349  |
| Bbx           | A_51_P388691 | NM_027444          | bobby sox homolog (Drosophila)             | 1.376 | 31.88 | 0.33274 | 4733 P  | 1.048  | 33.49 | 0.71415 | 10438 |
| Mapk8         | A_51_P357182 | NM_016700          | mitogen activated protein kinase 8         | 1.376 | 53.87 | 0.57786 | 12410 P | 1.018  | 40.63 | 0.81493 | 11325 |
| Rab6b         | A_51_P276418 | NM_173781          | RAB6B, member RAS oncogene family          | 1.376 | 12.21 | 0.20804 | 2036 P  | -1.018 | 49.39 | 0.72185 | 10509 |
| Slc26a3       | A_52_P31381  | NM_021353          | solute carrier family 26, member 3         | 1.376 | 77.44 | 0.83547 | 22938 M | 1.032  | 30.75 | 0.45693 | 8069  |
| Zswim6        | A_52_P663005 | AK037945           | zinc finger, SWIM domain containing 6      | 1.376 | 28.61 | 0.3128  | 4209 P  | -1.039 | 43.75 | 0.39542 | 7466  |
| 2610301B20Rik | A_51_P425768 | NM_026005          | RIKEN cDNA 2610301B20 gene                 | 1.373 | 10.84 | 0.2048  | 2000 P  | 1.013  | 42.43 | 0.78065 | 10991 |
| Adamts1       | A_52_P213932 | NM_009621          | a disintegrin-like and metallopeptidase (m | 1.373 | 57.76 | 0.61718 | 14261 P | 1.151  | 16.2  | 0.47883 | 8297  |
| Fbxl17        | A_52_P268279 | XM_925135          | F-box and leucine-rich repeat protein 17   | 1.373 | 20.94 | 0.35717 | 4441 M  | 1.048  | 28.13 | 0.41344 | 7661  |
| Mmp16         | A_51_P195775 | NM_019724          | matrix metallopeptidase 16                 | 1.373 | 20.94 | 0.24428 | 2660 P  | 1.057  | 19.02 | 0.24312 | 5551  |
| Rnaset2       | A_51_P310100 | AK029149           | ribonuclease T2B                           | 1.373 | 31.88 | 0.34829 | 5065 P  | 1.053  | 25.31 | 0.43136 | 7846  |
| Hdgfrp3       | A_52_P545066 | NM_013886          | hepatoma-derived growth factor, related    | 1.372 | 25.79 | 0.29672 | 3743 P  | -1.011 | 49.48 | 0.82262 | 11383 |
| Lgmn          | A_51_P110576 | NM_011175          | legumain                                   | 1.372 | 12.21 | 0.21423 | 2108 P  | 1.303  | 2.53  | 0.04603 | 1729  |
| Cyp4v3        | A_52_P302345 | NM_133969          | cytochrome P450, family 4, subfamily v, p  | 1.371 | 20.94 | 0.25385 | 2895 P  | 1.364  | 1.17  | 0.02177 | 919   |
| Ing3          | A_52_P154880 | NM_023626          | inhibitor of growth family, member 3       | 1.371 | 31.88 | 0.33676 | 4826 P  | 1.113  | 9.71  | 0.1255  | 3615  |
| Bphl          | A_51_P283876 | NM_026512          | biphenyl hydrolase-like (serine hydrolase, | 1.37  | 18.5  | 0.3228  | 3902 M  | 1.26   | 1.17  | 0.00965 | 350   |
| Mast1         | A_51_P196113 | NM_019945          | microtubule associated serine/threonine    | 1.37  | 61.79 | 0.63452 | 15441 P | 1.093  | 13.58 | 0.17698 | 4516  |
| Ndn           | A_52_P451644 | NM_010882          | necdin                                     | 1.37  | 49.93 | 0.51541 | 10132 P | 1.218  | 2.53  | 0.02825 | 1144  |
| Pfkfb1        | A_51_P359586 | NM_008824          | 6-phosphofructo-2-kinase/fructose-2,6-b    | 1.37  | 25.79 | 0.28357 | 3499 P  | 1.07   | 16.2  | 0.16689 | 4327  |
| Pign          | A_51_P221274 | NM_013784          | phosphatidylinositol glycan anchor biosyr  | 1.37  | 53.87 | 0.53563 | 10907 P | 1.1    | 11.33 | 0.16485 | 4293  |
| Stard4        | A_52_P384574 | NM_133774          | StAR-related lipid transfer (START) domain | 1.369 | 20.94 | 0.259   | 2972 P  | 1.121  | 11.33 | 0.1985  | 4873  |
| Plek          | A_51_P238357 | NM_019549          | pleckstrin                                 | 1.368 | 53.87 | 0.55993 | 11751 P | 1.228  | 3.82  | 0.0814  | 2689  |
| Rars          | A_52_P288614 | NM_025936          | arginyl-tRNA synthetase                    | 1.368 | 61.79 | 0.67716 | 17337 P | -1.075 | 28.13 | 0.2124  | 5083  |
| Asxl1         | A_52_P549405 | NM_001039939       | additional sex combs like 1 (Drosophila)   | 1.367 | 45.92 | 0.46785 | 8466 P  | 1.065  | 19.02 | 0.26891 | 5932  |
| Mtch1         | A_52_P126162 | NM_019880          | mitochondrial carrier homolog 1 (C. elega  | 1.367 | 57.76 | 0.62843 | 11534 M | 1.02   | 38.4  | 0.68632 | 10208 |
| Obfc1         | A_52_P340692 | NM_175360          | oligonucleotide/oligosaccharide-binding f  | 1.367 | 31.88 | 0.3333  | 4747 P  | 1.097  | 9.71  | 0.10041 | 3112  |
| Slc11a1       | A_51_P186476 | NM_013612          | solute carrier family 11 (proton-coupled c | 1.367 | 42.28 | 0.44218 | 7717 P  | 1.058  | 22.1  | 0.30041 | 6324  |
| D13Wsu177e    | A_51_P474158 | NM_178605          | DNA segment, Chr 13, Wayne State Unive     | 1.366 | 23.47 | 0.27555 | 3330 P  | 1.028  | 36.07 | 0.67849 | 10125 |
| No14          | A_52_P167317 | NM_199024          | nucleolar protein 4                        | 1.366 | 20.94 | 0.2527  | 2846 P  | 1.311  | 1.17  | 0.01278 | 541   |
| Rorc          | A_51_P282930 | NM_011281          | RAR-related orphan receptor gamma          | 1.365 | 45.92 | 0.46179 | 8265 P  | 1.118  | 19.02 | 0.47441 | 8251  |
| Bmpr2         | A_51_P492648 | AK140220           | bone morphogenic protein receptor, type    | 1.364 | 31.88 | 0.32642 | 4551 P  | 1.077  | 19.02 | 0.32816 | 6651  |
| Chrd11        | A_52_P674808 | ENSMUST00000074660 | chordin-like 1                             | 1.364 | 75.14 | 0.83638 | 26840 P | 1.015  | 42.43 | 0.83421 | 11487 |
| Flrt2         | A_52_P615362 | BC067058           | fibronectin leucine rich transmembrane p   | 1.364 | 69.29 | 0.73504 | 20451 P | 1.087  | 16.2  | 0.23558 | 5425  |
| Nelf          | A_51_P169886 | NM_001039386       | nasal embryonic LHRH factor                | 1.364 | 20.94 | 0.24522 | 2712 P  | 1.096  | 9.71  | 0.2511  | 5229  |
| Pdgfd         | A_52_P636948 | AK141551           | platelet-derived growth factor, D polypep  | 1.364 | 53.87 | 0.57305 | 12136 P | 1.043  | 28.13 | 0.39069 | 7402  |
| Rassf6        | A_51_P491916 | NM_028478          | Ras association (RalGDS/AF-6) domain far   | 1.364 | 53.87 | 0.53484 | 10885 P | 1.135  | 3.82  | 0.03143 | 1239  |
| 2610024B07Rik | A_51_P473633 | AK035191           | RIKEN cDNA 2610024B07 gene                 | 1.363 | 49.93 | 0.50253 | 9747 P  | 1.214  | 3.46  | 0.04227 | 1590  |
| Usp18         | A_51_P164219 | NM_011909          | ubiquitin specific peptidase 18            | 1.363 | 31.88 | 0.34447 | 4989 P  | 1.22   | 5.75  | 0.11669 | 3414  |
| Mll3          | A_52_P448569 | XM_001002522       | myeloid/lymphoid or mixed-lineage leuke    | 1.361 | 31.88 | 0.34663 | 5040 P  | 1.048  | 25.31 | 0.33009 | 6663  |
| Ppp1r7        | A_52_P630502 | NM_023200          | protein phosphatase 1, regulatory (inhibi  | 1.361 | 35.45 | 0.35168 | 5158 P  | 1.087  | 11.33 | 0.12962 | 3681  |
| Rbm28         | A_51_P437787 | NM_026650          | RNA binding motif protein 28               | 1.361 | 28.61 | 0.32302 | 4439 P  | -1.139 | 4.63  | 0.06215 | 2197  |
| Cspg2         | A_52_P251703 | D28599             | versican                                   | 1.36  | 53.87 | 0.54946 | 11423 P | -1.031 | 47.43 | 0.69606 | 10284 |

|               |              |              |                                                |       |       |         |         |        |       |         |       |
|---------------|--------------|--------------|------------------------------------------------|-------|-------|---------|---------|--------|-------|---------|-------|
| Narg1         | A_52_P191341 | AK078042     | NMDA receptor-regulated gene 1                 | 1.36  | 38.68 | 0.40388 | 6578 P  | 1.02   | 38.4  | 0.66474 | 10002 |
| Trim37        | A_52_P252127 | NM_197987    | tripartite motif protein 37                    | 1.36  | 20.94 | 0.25244 | 2833 P  | 1.067  | 16.2  | 0.16269 | 4268  |
| Apex1         | A_51_P473576 | NM_009687    | apurinic/apyrimidinic endonuclease 1           | 1.359 | 18.5  | 0.24033 | 2550 P  | -1.143 | 1.62  | 0.02547 | 1057  |
| Mlf1          | A_51_P205106 | NM_010801    | myeloid leukemia factor 1                      | 1.359 | 53.87 | 0.55338 | 11542 P | -1.016 | 49.47 | 0.72103 | 10503 |
| Ttc7b         | A_51_P136699 | XM_127105    | tetratricopeptide repeat domain 7B             | 1.359 | 31.88 | 0.3472  | 5053 P  | 1.197  | 3.46  | 0.04397 | 1645  |
| Arhgef17      | A_52_P119301 | XM_133692    | Rho guanine nucleotide exchange factor (       | 1.358 | 31.88 | 0.33775 | 4882 P  | 1.052  | 22.1  | 0.31555 | 6532  |
| Jak1          | A_52_P106463 | NM_146145    | Janus kinase 1                                 | 1.358 | 38.68 | 0.39052 | 6184 P  | 1.259  | 2.53  | 0.04276 | 1605  |
| Slc1a2        | A_51_P477875 | NM_011393    | solute carrier family 1 (glial high affinity g | 1.358 | 72.2  | 0.80189 | 24158 P | 1.141  | 6.98  | 0.07515 | 2539  |
| Upf3a         | A_52_P263386 | AK033239     | UPF3 regulator of nonsense transcripts ho      | 1.358 | 61.79 | 0.51785 | 9845 M  | -1.017 | 49.48 | 0.73985 | 10684 |
| Ap1g1         | A_51_P197965 | AK037086     | adaptor protein complex AP-1, gamma 1 s        | 1.357 | 49.93 | 0.4763  | 8472 M  | 1.153  | 5.75  | 0.06361 | 2249  |
| 2610020C11Rik | A_52_P211037 | NM_028130    | RIKEN cDNA 2610020C11 gene                     | 1.356 | 25.79 | 0.28744 | 3562 P  | -1.29  | 0.51  | 0.00627 | 165   |
| Msh2          | A_52_P159095 | AK051960     | mutS homolog 2 (E. coli)                       | 1.356 | 61.79 | 0.58783 | 12305 M | 1.033  | 36.07 | 0.65314 | 9900  |
| Creb3         | A_52_P231714 | NM_013497    | cAMP responsive element binding protein        | 1.354 | 53.87 | 0.52805 | 10662 P | 1.036  | 30.75 | 0.43307 | 7871  |
| Gas1          | A_51_P157083 | NM_008086    | growth arrest specific 1                       | 1.354 | 23.47 | 0.27137 | 3192 P  | 1.027  | 33.49 | 0.551   | 9040  |
| Mas1          | A_51_P152623 | NM_008552    | MAS1 oncogene                                  | 1.354 | 72.2  | 0.73506 | 19219 P | -1.037 | 46.3  | 0.63048 | 9723  |
| Sc4mol        | A_51_P209372 | NM_025436    | sterol-C4-methyl oxidase-like                  | 1.354 | 18.5  | 0.27911 | 3139 P  | -1.07  | 47.43 | 0.82428 | 11404 |
| BC053994      | A_52_P556390 | BC096528     | RIKEN cDNA A230067G21 gene                     | 1.353 | 42.28 | 0.38549 | 5824 M  | -1.282 | 0.51  | 0.00901 | 327   |
| Gabarapl1     | A_52_P633410 | NM_020590    | gamma-aminobutyric acid (GABA(A)) rece         | 1.353 | 28.61 | 0.41521 | 5707 M  | 1.205  | 2.53  | 0.01962 | 836   |
| Lpp           | A_52_P260856 | AK050035     | LIM domain containing preferred transloc       | 1.352 | 18.5  | 0.24348 | 2643 P  | 1.254  | 2.53  | 0.03097 | 1221  |
| Ppp3ca        | A_52_P513099 | AK036998     |                                                | 1.352 | 38.68 | 0.39414 | 6277 P  | 1.277  | 1.17  | 0.01132 | 440   |
| Spag9         | A_51_P312896 | AK030165     | sperm associated antigen 9                     | 1.352 | 49.93 | 0.49059 | 9248 P  | 1.519  | 0.3   | 0.01279 | 555   |
| Vim           | A_52_P287532 | AK033175     | vimentin                                       | 1.352 |       | 0.33488 | 4411 A  | -1.246 | 3.46  | 0.14558 | 3955  |
| 1110033M05Rik | A_52_P185797 | AK037713     | RIKEN cDNA 1110033M05 gene                     | 1.351 | 65.79 | 0.69235 | 18047 P | 1.071  | 16.2  | 0.21191 | 5072  |
| Ccng1         | A_52_P612803 | NM_009831    | cyclin G1                                      | 1.351 | 25.79 | 0.40383 | 5446 M  | 1.096  | 9.71  | 0.10799 | 3233  |
| Gfm2          | A_52_P378937 | AK052633     | G elongation factor, mitochondrial 2           | 1.351 | 28.61 | 0.30828 | 4120 P  | -1.092 | 28.13 | 0.31512 | 6527  |
| Hbb-b1        | A_52_P213909 | NM_008220    | hemoglobin, beta adult major chain             | 1.351 | 65.79 | 0.68445 | 17635 P | 1.123  | 25.31 | 0.6291  | 9707  |
| Phf2011       | A_52_P286605 | BC052212     | PHD finger protein 20-like 1                   | 1.351 | 10.84 | 0.21677 | 2165 P  | 1.081  | 13.58 | 0.13407 | 3745  |
| Slc1a4        | A_52_P273098 | NM_018861    | solute carrier family 1 (glutamate/neutral     | 1.351 | 31.88 | 0.34409 | 4982 P  | 1.136  | 11.33 | 0.21612 | 5131  |
| Trpm4         | A_52_P303100 | NM_175130    | transient receptor potential cation chann      | 1.351 | 25.79 | 0.28362 | 3504 P  | -1.008 | 49.48 | 0.87183 | 11780 |
| 1700093K21Rik | A_51_P326555 | AK007052     | RIKEN cDNA 1700093K21 gene                     | 1.35  | 49.93 | 0.43418 | 7195 M  | 1.006  | 42.43 | 0.91054 | 12195 |
| Igf2bp1       | A_52_P620742 | AK085396     | insulin-like growth factor 2 mRNA binding      | 1.35  |       | 0.66845 | 9743 A  | -1.303 | 0.75  | 0.02905 | 1170  |
| Blvra         | A_51_P363103 | NM_026678    | biliverdin reductase A                         | 1.349 | 28.61 | 0.31744 | 4303 P  | -1.033 | 46.85 | 0.64576 | 9855  |
| Ubl3          | A_52_P487246 | NM_011908    | ubiquitin-like 3                               | 1.349 | 18.5  | 0.32165 | 3882 M  | 1.227  | 1.58  | 0.01141 | 448   |
| Nsg1          | A_51_P358755 | NM_010942    | neuron specific gene family member 1           | 1.348 | 35.45 | 0.37282 | 5689 P  | -1.095 | 28.13 | 0.2983  | 6300  |
| Cask          | A_51_P167232 | NM_009806    | calcium/calmodulin-dependent serine pro        | 1.347 | 35.45 | 0.35125 | 5149 P  | -1.006 | 49.48 | 0.91966 | 12271 |
| D730040F13Rik | A_51_P455429 | NM_175518    | RIKEN cDNA D730040F13 gene                     | 1.347 |       | 0.63941 | 10080 A | 1.11   | 9.71  | 0.08996 | 2896  |
| Mrps27        | A_52_P615312 | NM_173757    | mitochondrial ribosomal protein S27            | 1.347 | 20.94 | 0.26372 | 3056 P  | -1.047 | 42.43 | 0.36542 | 7105  |
| Reg3g         | A_51_P354126 | NM_011260    | regenerating islet-derived 3 gamma             | 1.346 | 77.44 | 0.84731 | 27579 P | -1.031 | 45.68 | 0.50535 | 8635  |
| Fbxw8         | A_52_P216539 | NM_172721    | F-box and WD-40 domain protein 8               | 1.345 | 31.88 | 0.34602 | 5031 P  | 1.067  | 16.2  | 0.2074  | 5014  |
| LOC380687     | A_52_P479958 | NM_001001978 | predicted gene, EG622339                       | 1.345 | 12.21 | 0.2268  | 2310 P  | 1.035  | 36.07 | 0.74374 | 10741 |
| Mre11a        | A_51_P446678 | NM_018736    | meiotic recombination 11 homolog A (S. c       | 1.344 | 53.87 | 0.56738 | 11958 P | -1.028 | 47.43 | 0.64455 | 9838  |
| 9630050M13Rik | A_51_P231587 | XM_194000    | RIKEN cDNA 9630050M13 gene                     | 1.343 | 28.61 | 0.30828 | 4119 P  | 1.279  | 1.32  | 0.01469 | 627   |
| Creb5         | A_52_P137529 | AK051306     | cAMP responsive element binding protein        | 1.343 | 79.26 | 0.84604 | 19615 M | -1.02  | 47.92 | 0.63506 | 9762  |
| Dab2          | A_51_P157994 | NM_001037905 | disabled homolog 2 (Drosophila)                | 1.343 | 25.79 | 0.28122 | 3471 P  | -1.064 | 38.4  | 0.38356 | 7321  |
| Npepl1        | A_52_P435670 | NM_213733    | aminopeptidase-like 1                          | 1.343 | 23.47 | 0.27555 | 3328 P  | -1.001 | 49.48 | 0.98171 | 12872 |
| Pank1         | A_51_P123320 | AK019493     | pantothenate kinase 1                          | 1.343 | 45.92 | 0.38011 | 5460 M  | 1.107  | 8.32  | 0.05927 | 2123  |
| Supt3h        | A_51_P510663 | NM_178652    | suppressor of Ty 3 homolog (S. cerevisiae      | 1.343 | 31.88 | 0.32642 | 4543 P  | -1.183 | 3.46  | 0.07728 | 2584  |
| Pam           | A_52_P494289 | AK053025     | peptidylglycine alpha-amidating monooxy        | 1.342 | 53.87 | 0.54946 | 11420 P | 1.101  | 9.71  | 0.08013 | 2659  |
| Tuba4         | A_52_P676271 | NM_009447    | tubulin, alpha 4A                              | 1.342 | 42.28 | 0.41613 | 6923 P  | 1.146  | 6.98  | 0.09998 | 3104  |
| Igf1          | A_52_P306327 | AK050118     | insulin-like growth factor 1                   | 1.341 | 72.2  | 0.77139 | 22285 M | 1.138  | 8.32  | 0.13213 | 3714  |
| Numb1         | A_51_P158355 | U96441       | numb-like                                      | 1.341 | 31.88 | 0.3333  | 4748 P  | 1.07   | 19.02 | 0.25674 | 5761  |
| Trim35        | A_52_P383913 | AK020775     | tripartite motif-containing 35                 | 1.341 | 35.45 | 0.35412 | 5222 P  | 1.078  | 13.58 | 0.15587 | 4148  |
| C030010B13Rik | A_51_P482279 | AK030794     |                                                | 1.34  | 61.79 | 0.64119 | 15739 P | -1.105 | 13.58 | 0.14548 | 3952  |

|               |              |                    |                                                                             |       |       |         |         |        |       |         |       |
|---------------|--------------|--------------------|-----------------------------------------------------------------------------|-------|-------|---------|---------|--------|-------|---------|-------|
| Gstt1         | A_51_P179664 | NM_008185          | glutathione S-transferase, theta 1                                          | 1.34  | 35.45 | 0.37749 | 5869 P  | -1.115 | 19.02 | 0.23951 | 5476  |
| Sh3d19        | A_52_P273169 | XM_994427          | SH3 domain protein D19                                                      | 1.34  | 18.5  | 0.25063 | 2792 P  | 1.084  | 11.33 | 0.11933 | 3474  |
| A430106J12Rik | A_52_P578876 | AK051140           | RIKEN cDNA A430106J12 gene                                                  | 1.338 | 65.79 | 0.67635 | 17324 P | 1.097  | 13.58 | 0.1973  | 4858  |
| Egfl7         | A_52_P15122  | NM_178444          | EGF-like domain 7                                                           | 1.338 | 38.68 | 0.38297 | 5975 P  | -1.081 | 22.1  | 0.1523  | 4072  |
| Ensa          | A_52_P222021 | NM_019561          | endosulfine alpha                                                           | 1.338 | 42.28 | 0.44291 | 7748 P  | 1.166  | 3.82  | 0.03267 | 1284  |
| Msra          | A_51_P299243 | NM_026322          | methionine sulfoxide reductase A                                            | 1.338 | 42.28 | 0.43444 | 7484 P  | 1.123  | 11.33 | 0.26073 | 5829  |
| Tgfb1i1       | A_51_P366344 | NM_009365          | transforming growth factor beta 1 inducible                                 | 1.338 | 25.79 | 0.29949 | 3842 P  | 1.009  | 42.43 | 0.88455 | 11922 |
| Rdh13         | A_52_P269334 | AK089458           | retinol dehydrogenase 13 (all-trans and 9-cis)                              | 1.337 | 42.28 | 0.42844 | 7306 P  | -1.041 | 45.05 | 0.60121 | 9463  |
| Smarca2       | A_52_P388829 | NM_011416          | SWI/SNF related, matrix associated, actin dependent                         | 1.337 | 49.93 | 0.51595 | 10164 P | 1.109  | 9.71  | 0.11933 | 3476  |
| Uchl3         | A_52_P537050 | NM_016723          | ubiquitin carboxyl-terminal esterase L3 (ubiquitin                          | 1.337 | 42.28 | 0.4222  | 7114 P  | -1.157 | 2.04  | 0.03443 | 1323  |
| Ccr1          | A_52_P616356 | NM_009912          | chemokine (C-C motif) receptor 1                                            | 1.336 |       | 0.72464 | 10525 A | -1.289 | 0.51  | 0.0067  | 209   |
| Ndufa7        | A_52_P347591 | NM_023202          | NADH dehydrogenase (ubiquinone) 1 alpha subunit                             | 1.336 | 28.61 | 0.41554 | 5714 M  | 1.038  | 33.49 | 0.61383 | 9565  |
| Adamts20      | A_52_P242480 | AK090358           | a disintegrin-like and metallopeptidase (with thrombospondin type 1 motifs) | 1.335 | 75.14 | 0.82805 | 25893 P | -1.05  | 40.63 | 0.34054 | 6774  |
| Cdc25b        | A_51_P474431 | NM_023117          | cell division cycle 25 homolog B (S. pombe)                                 | 1.335 | 38.68 | 0.40075 | 6530 P  | -1.067 | 36.07 | 0.3246  | 6613  |
| Tle6          | A_51_P368591 | NM_053254          | transducin-like enhancer of split 6, homolog 1                              | 1.335 | 57.76 | 0.60024 | 13445 P | 1.028  | 33.49 | 0.55885 | 9095  |
| Uba52         | A_52_P475889 | NM_019883          | ubiquitin A-52 residue ribosomal protein                                    | 1.335 | 38.68 | 0.35096 | 4775 P  | 1.042  | 30.75 | 0.50539 | 8639  |
| Cpeb1         | A_52_P462296 | NM_007755          | cytoplasmic polyadenylation element binding protein 1                       | 1.334 | 18.5  | 0.37908 | 4914 M  | 1.204  | 8.32  | 0.20058 | 4912  |
| Slc4a1        | A_51_P196972 | NM_011403          | solute carrier family 4 (anion exchanger), member 1                         | 1.334 | 42.28 | 0.44218 | 7719 P  | -1.181 | 1.58  | 0.02885 | 1161  |
| Lztf1l        | A_52_P215597 | NM_033322          | leucine zipper transcription factor-like 1                                  | 1.333 | 31.88 | 0.33008 | 4675 P  | -1.048 | 43.15 | 0.44979 | 7991  |
| Mab21l2       | A_51_P327206 | NM_011839          | mab-21-like 2 (C. elegans)                                                  | 1.333 | 25.79 | 0.28279 | 3375 P  | 1.047  | 30.75 | 0.5337  | 8875  |
| Thoc1         | A_52_P243025 | NM_153552          | THO complex 1                                                               | 1.333 | 53.87 | 0.5923  | 11710 P | 1.11   | 13.58 | 0.27226 | 5987  |
| 2700049A03Rik | A_51_P196226 | BC043104           | RIKEN cDNA 2700049A03 gene                                                  | 1.332 | 20.94 | 0.25894 | 2968 P  | 1.052  | 22.1  | 0.32409 | 6601  |
| 9130404D08Rik | A_52_P38456  | AK081612           | RIKEN cDNA 9130404D08 gene                                                  | 1.332 | 61.79 | 0.50238 | 8070 M  | 1.103  | 9.71  | 0.11501 | 3378  |
| Tardbp        | A_52_P299292 | NM_001008546       | TAR DNA binding protein                                                     | 1.332 | 25.79 | 0.28781 | 3576 P  | 1.107  | 11.33 | 0.18638 | 4677  |
| Aebp1         | A_51_P336770 | NM_009636          | AE binding protein 1                                                        | 1.331 | 49.93 | 0.51764 | 10241 P | -1.073 | 28.13 | 0.1894  | 4712  |
| Ccnc          | A_52_P456674 | NM_016746          | cyclin C                                                                    | 1.331 | 38.68 | 0.38285 | 5973 P  | -1.041 | 44.4  | 0.53045 | 8836  |
| Ireb2         | A_52_P680908 | NM_022655          | iron responsive element binding protein 2                                   | 1.331 | 49.93 | 0.49949 | 9639 P  | -1.003 | 49.48 | 0.96931 | 12739 |
| Pcmt1         | A_51_P225853 | NM_008786          | protein-L-isoaspartate (D-aspartate) O-methyltransferase                    | 1.331 | 28.61 | 0.30389 | 3980 P  | 1.097  | 13.58 | 0.19009 | 4720  |
| Serpinf2      | A_51_P174176 | NM_008878          | serine (or cysteine) peptidase inhibitor, clade S, member 2                 | 1.331 | 69.29 | 0.63638 | 14442 M | 1.084  | 13.58 | 0.14276 | 3901  |
| Sh3bgrl       | A_52_P426513 | NM_019989          | SH3-binding domain glutamic acid-rich protein                               | 1.331 | 25.79 | 0.41455 | 5691 M  | 1.11   | 11.33 | 0.15029 | 4041  |
| Ubl5          | A_52_P188134 | NM_025401          | ubiquitin-like 5                                                            | 1.331 | 53.87 | 0.52245 | 10430 P | -1.095 | 16.2  | 0.12613 | 3633  |
| Spna1         | A_51_P501069 | NM_011465          | spectrin alpha 1                                                            | 1.33  |       | 0.82935 | 11001 A | -1.035 | 45.68 | 0.54537 | 8987  |
| Thbs1         | A_52_P337086 | NM_011580          | thrombospondin 1                                                            | 1.33  | 57.76 | 0.59941 | 13419 P | -1.02  | 49.48 | 0.82791 | 11439 |
| AV249152      | A_51_P235853 | NM_145425          | expressed sequence AV249152                                                 | 1.329 | 53.87 | 0.54741 | 11307 P | 1.049  | 25.31 | 0.317   | 6551  |
| BC003965      | A_51_P357838 | XM_128528          | cDNA sequence BC003965                                                      | 1.329 | 49.93 | 0.49694 | 9505 P  | 1.048  | 30.75 | 0.55707 | 9080  |
| Gnai2         | A_51_P432484 | NM_008138          | guanine nucleotide binding protein, alpha 2                                 | 1.329 | 25.79 | 0.29965 | 3854 P  | 1.073  | 13.58 | 0.16225 | 4262  |
| 9630020C08Rik | A_52_P623511 | AK080592           | neuron navigator 3                                                          | 1.328 | 72.2  | 0.78154 | 22833 P | 1.019  | 38.4  | 0.67768 | 10116 |
| Cpa3          | A_51_P214127 | NM_007753          | carboxypeptidase A3, mast cell                                              | 1.327 |       | 0.60428 | 9158 A  | -1.061 | 33.49 | 0.2463  | 5594  |
| Pycr1         | A_51_P503896 | ENSMUST00000026133 | pyrroline-5-carboxylate reductase 1                                         | 1.327 | 23.47 | 0.28012 | 3427 P  | -1.127 | 5.75  | 0.07515 | 2538  |
| Cry1          | A_51_P302204 | NM_007771          | cryptochrome 1 (photolyase-like)                                            | 1.326 | 12.21 | 0.24026 | 2549 P  | 1.079  | 22.1  | 0.44389 | 7954  |
| Eps15         | A_52_P360595 | BC048783           | epidermal growth factor receptor pathway substrate 2                        | 1.326 | 28.61 | 0.30439 | 4009 P  | 1.202  | 5.75  | 0.12486 | 3600  |
| Exo1          | A_51_P239984 | NM_012012          | exonuclease 1                                                               | 1.326 | 57.76 | 0.51941 | 9451 M  | -1.045 | 40.63 | 0.31472 | 6520  |
| Ghitm         | A_52_P246749 | NM_078478          | growth hormone inducible transmembrane protein                              | 1.326 | 25.79 | 0.41752 | 5749 M  | 1.206  | 4.63  | 0.08867 | 2858  |
| Hdgf          | A_52_P339791 | NM_008231          | hepatoma-derived growth factor                                              | 1.326 | 35.45 | 0.35793 | 5373 P  | 1.172  | 5.75  | 0.08145 | 2693  |
| Cdkn1a        | A_51_P363947 | NM_007669          | cyclin-dependent kinase inhibitor 1A (P21)                                  | 1.325 | 53.87 | 0.5437  | 11150 P | 1.291  | 3.01  | 0.06486 | 2279  |
| Usp15         | A_52_P124812 | AK122301           | ubiquitin specific peptidase 15                                             | 1.325 | 31.88 | 0.34305 | 4977 P  | 1.04   | 28.13 | 0.39135 | 7413  |
| Chm           | A_52_P236373 | NM_018818          | choroideremia                                                               | 1.324 | 25.79 | 0.29265 | 3547 M  | 1.069  | 22.1  | 0.43143 | 7851  |
| Dusp9         | A_52_P648601 | NM_029352          | dual specificity phosphatase 9                                              | 1.324 | 65.79 | 0.53635 | 9058 M  | 1.099  | 9.71  | 0.08313 | 2730  |
| Rab11fip5     | A_52_P529360 | NM_001003955       | RAB11 family interacting protein 5 (class I)                                | 1.324 | 53.87 | 0.55674 | 11643 P | -1.028 | 47.43 | 0.67517 | 10100 |
| Rassf2        | A_51_P355802 | NM_175445          | Ras association (RalGDS/AF-6) domain family 2                               | 1.324 |       | 0.73574 | 10804 A | 1.014  | 42.43 | 0.86564 | 11726 |
| Klf4          | A_51_P213544 | NM_010637          | Kruppel-like factor 4 (gut)                                                 | 1.323 | 65.79 | 0.72438 | 15130 M | 1.042  | 28.13 | 0.46213 | 8128  |
| Npc2          | A_51_P347961 | NM_023409          | Niemann Pick type C2                                                        | 1.323 | 45.92 | 0.47077 | 8572 P  | 1.001  | 42.43 | 0.99758 | 13034 |
| Ralgds        | A_51_P509518 | NM_009058          | ral guanine nucleotide dissociation stimulator                              | 1.323 | 57.76 | 0.58585 | 12819 P | -1.022 | 49.47 | 0.78401 | 11043 |

|               |               |                    |                                             |       |       |         |         |        |       |         |       |
|---------------|---------------|--------------------|---------------------------------------------|-------|-------|---------|---------|--------|-------|---------|-------|
| Rnaseh2a      | A_51_P424128  | ENSMUST00000065049 | ribonuclease H2, large subunit              | 1.323 | 28.61 | 0.32456 | 4498 P  | -1.008 | 49.48 | 0.87157 | 11776 |
| Rragd         | A_52_P490032  | NM_027491          | Ras-related GTP binding D                   | 1.323 | 42.28 | 0.41313 | 6856 P  | 1.075  | 16.2  | 0.18947 | 4714  |
| 4933439F18Rik | A_51_P511745  | NM_025757          | RIKEN cDNA 4933439F18 gene                  | 1.322 | 35.45 | 0.35929 | 5386 P  | 1.018  | 40.63 | 0.80166 | 11195 |
| Atox1         | A_51_P346153  | NM_009720          | ATX1 (antioxidant protein 1) homolog 1 (y   | 1.322 | 38.68 | 0.40199 | 6549 P  | 1.07   | 19.02 | 0.32686 | 6638  |
| Bspry         | A_51_P421559  | NM_138653          | B-box and SPRY domain containing            | 1.322 | 42.28 | 0.41069 | 6762 P  | 1.061  | 19.02 | 0.28685 | 6184  |
| Hc            | A_51_P155323  | NM_010406          | hemolytic complement                        | 1.322 | 45.92 | 0.47609 | 8839 P  | -1.067 | 38.4  | 0.38568 | 7344  |
| Lhx1          | A_51_P452119  | NM_008498          | LIM homeobox protein 1                      | 1.322 | 38.68 | 0.40939 | 6712 P  | 1.065  | 19.02 | 0.28883 | 6199  |
| Phb           | A_51_P165934  | NM_008831          | prohibitin                                  | 1.322 | 31.88 | 0.3333  | 4754 P  | 1.051  | 22.1  | 0.27579 | 6037  |
| Smurf1        | A_51_P181227  | NM_001038627       | SMAD specific E3 ubiquitin protein ligase   | 1.322 | 53.87 | 0.52271 | 10440 P | -1.039 | 44.4  | 0.49496 | 8510  |
| Tmem38b       | A_51_P181865  | NM_028053          | transmembrane protein 38B                   | 1.321 | 42.28 | 0.4272  | 7278 P  | -1.133 | 4.63  | 0.05657 | 2045  |
| Derl2         | A_52_P84275   | NM_033562          | Der1-like domain family, member 2           | 1.32  | 25.79 | 0.41761 | 5752 M  | 1.097  | 16.2  | 0.30529 | 6386  |
| Tom1l2        | A_51_P202162  | NM_001039093       | target of myb1-like 2 (chicken)             | 1.32  | 61.79 | 0.62089 | 13684 M | 1.109  | 9.71  | 0.11024 | 3273  |
| Wnt6          | A_51_P482571  | M89800             | wingless-related MMTV integration site 6    | 1.32  | 38.68 | 0.39458 | 6349 P  | -1.118 | 16.2  | 0.18985 | 4719  |
| Epb4.1l1      | A_52_P270490  | NM_001003815       | erythrocyte protein band 4.1-like 1         | 1.319 | 35.45 | 0.36697 | 5541 P  | 1.105  | 8.32  | 0.06237 | 2205  |
| Gnb1          | A_52_P304858  | NM_008142          | guanine nucleotide binding protein, beta    | 1.319 | 38.68 | 0.47485 | 7212 M  | 1.056  | 16.2  | 0.1986  | 4878  |
| Mesdc2        | A_52_P574974  | NM_023403          | mesoderm development candidate 2            | 1.319 | 61.79 | 0.65843 | 16505 P | 1      | 42.43 | 0.99732 | 13032 |
| Sdcbp         | A_51_P249494  | NM_016807          | syndecan binding protein                    | 1.319 | 38.68 | 0.48742 | 7507 M  | 1.325  | 3.46  | 0.11387 | 3364  |
| Acs1          | A_52_P597618  | NM_007981          | acyl-CoA synthetase long-chain family me    | 1.318 | 12.21 | 0.24458 | 2702 P  | 1.015  | 42.43 | 0.81045 | 11284 |
| Cad           | A_52_P16102   | NM_023525          | carbamoyl-phosphate synthetase 2, aspar     | 1.318 | 53.87 | 0.53335 | 10835 P | -1.075 | 28.13 | 0.19855 | 4877  |
| Mgst1         | A_52_P549827  | NM_019946          | microsomal glutathione S-transferase 1      | 1.318 | 79.26 | 0.88759 | 30115 P | 1.05   | 28.13 | 0.4417  | 7933  |
| Stag1         | A_52_P673971  | NM_009282          | stromal antigen 1                           | 1.318 | 53.87 | 0.52633 | 10573 P | 1.059  | 22.1  | 0.32601 | 6629  |
| Chfr          | A_52_P327971  | NM_172717          | checkpoint with forkhead and ring finger    | 1.317 | 61.79 | 0.65288 | 16242 P | 1.015  | 42.43 | 0.84226 | 11537 |
| H3f3b         | A_52_P217875  | NM_008211          | H3 histone, family 3B                       | 1.317 | 35.45 | 0.36757 | 5574 P  | 1.067  | 28.13 | 0.59219 | 9353  |
| Ldb2          | A_51_P388517  | NM_001077398       | LIM domain binding 2                        | 1.317 | 61.79 | 0.62328 | 14604 P | -1.024 | 49.48 | 0.82099 | 11369 |
| Zfp609        | A_52_P455352  | NM_172536          | zinc finger protein 609                     | 1.317 | 53.87 | 0.50395 | 9427 M  | 1.004  | 42.43 | 0.93833 | 12464 |
| Centd2        | A_51_P437247  | NM_001040111       | centaurin, delta 2                          | 1.316 | 35.45 | 0.36115 | 5425 P  | -1.003 | 49.48 | 0.94576 | 12549 |
| Kcnj8         | A_51_P312795  | NM_008428          | potassium inwardly-rectifying channel, su   | 1.316 | 69.29 | 0.71645 | 19310 P | 1.022  | 38.4  | 0.63996 | 9811  |
| Ndufab1       | A_51_P208801  | NM_028177          | NADH dehydrogenase (ubiquinone) 1, alp      | 1.316 | 53.87 | 0.55244 | 11506 P | 1.157  | 4.63  | 0.04865 | 1812  |
| Nr4a1         | A_51_P239654  | NM_010444          | nuclear receptor subfamily 4, group A, me   | 1.316 | 84.52 | 0.81285 | 23502 P | 1.229  | 8.32  | 0.21716 | 5156  |
| Sod1          | A_51_P367381  | NM_011434          | superoxide dismutase 1, soluble             | 1.316 | 57.76 | 0.63575 | 11759 M | 1.108  | 16.2  | 0.31601 | 6534  |
| BC004004      | A_52_P448466  | NM_030561          | cDNA sequence BC004004                      | 1.315 | 42.28 | 0.43451 | 7488 P  | -1.15  | 9.71  | 0.18379 | 4636  |
| Tceb2         | A_52_P1182012 | NM_026305          | transcription elongation factor B (SII), po | 1.315 | 38.68 | 0.40143 | 6538 P  | -1.002 | 49.48 | 0.98019 | 12848 |
| Tgfb2         | A_51_P317640  | NM_009367          | transforming growth factor, beta 2          | 1.315 | 38.68 | 0.39453 | 6328 P  | 1.079  | 13.58 | 0.18656 | 4679  |
| 2210010L05Rik | A_52_P388163  | NM_178081          | RIKEN cDNA 2210010L05 gene                  | 1.314 | 42.28 | 0.41119 | 6792 P  | 1.245  | 2.53  | 0.03528 | 1360  |
| 5730596K20Rik | A_52_P594927  | NM_146091          | RIKEN cDNA 5730596K20 gene                  | 1.314 | 38.68 | 0.39765 | 6454 P  | 1.053  | 30.75 | 0.5743  | 9222  |
| Gpr4          | A_51_P295806  | NM_175668          | G protein-coupled receptor 4                | 1.314 | 79.26 | 0.80717 | 23116 P | 1.035  | 30.75 | 0.4643  | 8154  |
| Fkbp10        | A_51_P216965  | NM_010221          | FK506 binding protein 10                    | 1.313 | 35.45 | 0.36627 | 5524 P  | 1.009  | 42.43 | 0.84595 | 11573 |
| Mocs3         | A_51_P146813  | XM_130596          | molybdenum cofactor synthesis 3             | 1.313 | 13.61 | 0.25143 | 2812 P  | 1.036  | 30.75 | 0.47083 | 8208  |
| Ogt           | A_52_P658241  | BC037194           | O-linked N-acetylglucosamine (GlcNAc) tr    | 1.313 | 25.79 | 0.30634 | 4060 P  | -1.083 | 19.02 | 0.12967 | 3684  |
| Rab8b         | A_51_P3366836 | NM_173413          | RAB8B, member RAS oncogene family           | 1.313 | 57.76 | 0.60906 | 13891 P | 1.018  | 40.63 | 0.78383 | 11040 |
| Timm9         | A_51_P421804  | NM_013896          | translocase of inner mitochondrial memb     | 1.313 | 38.68 | 0.39447 | 6308 P  | 1.022  | 40.63 | 0.77399 | 10953 |
| Bhlhb9        | A_51_P323081  | NM_198161          | basic helix-loop-helix domain containing,   | 1.312 | 25.79 | 0.30389 | 3979 P  | 1.035  | 28.13 | 0.40686 | 7587  |
| Ndufa3        | A_52_P69702   | NM_025348          | NADH dehydrogenase (ubiquinone) 1 alp       | 1.312 | 31.88 | 0.34902 | 5090 P  | -1.049 | 42.43 | 0.35417 | 6940  |
| Rpl5          | A_51_P183732  | NM_016980          | ribosomal protein L5                        | 1.312 | 53.87 | 0.5953  | 10577 M | 1.176  | 2.53  | 0.01861 | 789   |
| Timm10        | A_51_P348624  | NM_013899          | translocase of inner mitochondrial memb     | 1.312 | 38.68 | 0.39458 | 6348 P  | 1.103  | 13.58 | 0.2134  | 5090  |
| Usp19         | A_51_P136845  | NM_027804          | ubiquitin specific peptidase 19             | 1.312 | 35.45 | 0.37749 | 5867 P  | -1.228 | 0.75  | 0.01384 | 583   |
| Rpl30         | A_51_P268914  | NM_009083          | ribosomal protein L30                       | 1.311 | 31.88 | 0.44734 | 6517 M  | -1.043 | 46.3  | 0.71375 | 10436 |
| Ubp1          | A_51_P480062  | NM_023305          | ubiquitin-associated protein 1              | 1.311 | 35.45 | 0.35535 | 5251 P  | -1.021 | 48.7  | 0.70508 | 10361 |
| Wsb1          | A_51_P271370  | NM_001042565       | WD repeat and SOCS box-containing 1         | 1.311 | 57.76 | 0.57363 | 12182 P | -1.031 | 46.85 | 0.6291  | 9705  |
| Ylpm1         | A_52_P615158  | AK054220           | YLP motif containing 1                      | 1.311 | 35.45 | 0.35717 | 5310 P  | 1.205  | 3.82  | 0.06577 | 2308  |
| Aven          | A_52_P547730  | AK034962           | apoptosis, caspase activation inhibitor     | 1.31  | 61.79 | 0.65776 | 16485 P | -1.039 | 43.75 | 0.40349 | 7548  |
| Btf3          | A_51_P482600  | AK006780           | basic transcription factor 3                | 1.31  | 57.76 | 0.59336 | 13102 P | 1.169  | 8.32  | 0.15095 | 4053  |
| Clock         | A_52_P334677  | NM_007715          | circadian locomotor output cycles kaput     | 1.31  | 31.88 | 0.34833 | 5070 P  | 1.084  | 22.1  | 0.42915 | 7819  |

|               |              |              |                                             |       |       |         |         |        |       |         |       |
|---------------|--------------|--------------|---------------------------------------------|-------|-------|---------|---------|--------|-------|---------|-------|
| Hccs          | A_52_P241797 | AK028608     | holocytochrome c synthetase                 | 1.31  | 42.28 | 0.43862 | 7593 P  | 1.04   | 28.13 | 0.41573 | 7687  |
| Tead1         | A_51_P422603 | NM_009346    | TEA domain family member 1                  | 1.31  | 61.79 | 0.6422  | 15810 P | 1.125  | 6.98  | 0.05044 | 1864  |
| Vamp2         | A_52_P240905 | NM_009497    | vesicle-associated membrane protein 2       | 1.31  | 42.28 | 0.43701 | 7541 P  | 1.05   | 25.31 | 0.41711 | 7709  |
| Cdc42se2      | A_51_P340013 | NM_178626    | CDC42 small effector 2                      | 1.309 | 35.45 | 0.3596  | 5392 P  | 1.092  | 8.32  | 0.07384 | 2504  |
| Lgi4          | A_51_P217386 | NM_144556    | leucine-rich repeat LGI family, member 4    | 1.309 | 53.87 | 0.53335 | 10844 P | -1.067 | 28.13 | 0.19116 | 4751  |
| Mag1          | A_52_P44205  | NM_001029850 | membrane associated guanylate kinase, v     | 1.309 | 65.79 | 0.70123 | 18444 P | -1.017 | 49.48 | 0.7401  | 10687 |
| Ndr3          | A_51_P346722 | NM_013865    | N-myc downstream regulated gene 3           | 1.309 | 12.21 | 0.2527  | 2835 P  | 1.175  | 3.82  | 0.04595 | 1723  |
| Prep          | A_52_P90124  | NM_011156    | prolyl endopeptidase                        | 1.309 | 42.28 | 0.42082 | 7061 P  | 1.108  | 6.98  | 0.05211 | 1916  |
| Setbp1        | A_52_P230167 | NM_053099    | SET binding protein 1                       | 1.309 | 53.87 | 0.519   | 10315 P | 1.056  | 19.02 | 0.24053 | 5499  |
| Coro2b        | A_52_P538995 | NM_175484    | coronin, actin binding protein, 2B          | 1.308 | 53.87 | 0.54744 | 11315 P | -1.069 | 36.07 | 0.36669 | 7122  |
| Creml         | A_52_P460957 | NM_013498    | cAMP responsive element modulator           | 1.308 | 72.2  | 0.77774 | 22634 P | 1.379  | 2.53  | 0.08551 | 2786  |
| Efnb2         | A_51_P380970 | NM_010111    | ephrin B2                                   | 1.308 | 57.76 | 0.59361 | 13130 P | 1.037  | 30.75 | 0.46191 | 8122  |
| Fn1           | A_51_P100856 | NM_010233    | fibronectin 1                               | 1.308 |       | 0.47461 | 6857 A  | -1.066 | 36.07 | 0.35082 | 6881  |
| Ablim1        | A_52_P489778 | AK154082     | actin-binding LIM protein 1                 | 1.307 | 49.93 | 0.49841 | 9588 M  | 1.141  | 6.98  | 0.09557 | 3008  |
| Atp5g2        | A_52_P287002 | NM_026468    | ATP synthase, H+ transporting, mitochond    | 1.307 | 20.94 | 0.41119 | 5610 M  | -1.042 | 44.4  | 0.51164 | 8684  |
| Cmya5         | A_51_P493016 | AJ511265     | cardiomyopathy associated 5                 | 1.307 | 45.92 | 0.39529 | 6139 M  | -1.022 | 49    | 0.72705 | 10534 |
| Nfe2l1        | A_51_P491720 | NM_008686    | nuclear factor, erythroid derived 2,-like 1 | 1.307 | 42.28 | 0.50441 | 8003 M  | 1.259  | 1.62  | 0.01586 | 685   |
| Uaca          | A_51_P437336 | NM_028283    | uveal autoantigen with coiled-coil domain   | 1.307 | 49.93 | 0.49105 | 9257 P  | -1.087 | 13.58 | 0.10452 | 3197  |
| Ntf3          | A_52_P525161 | NM_008742    | neurotrophin 3                              | 1.306 | 57.76 | 0.5707  | 12084 P | 1.121  | 11.33 | 0.23872 | 5465  |
| Tgfb1         | A_52_P4538   | NM_009370    | transforming growth factor, beta receptor   | 1.306 | 31.88 | 0.41653 | 6102 M  | 1.09   | 13.58 | 0.15679 | 4163  |
| 1110029E03Rik | A_51_P385010 | NM_172866    | RIKEN cDNA 1110029E03 gene                  | 1.305 | 42.28 | 0.37527 | 5527 M  | 1.031  | 33.49 | 0.52116 | 8761  |
| Blvrb         | A_51_P460844 | NM_144923    | biliverdin reductase B (flavin reductase (N | 1.305 | 42.28 | 0.43796 | 7562 P  | -1.016 | 49.48 | 0.7657  | 10899 |
| Hdac11        | A_51_P213334 | NM_144919    | histone deacetylase 11                      | 1.304 | 31.88 | 0.33133 | 4692 P  | -1.002 | 49.48 | 0.96667 | 12718 |
| Map2k6        | A_52_P395242 | AK086722     | mitogen activated protein kinase kinase 6   | 1.304 | 53.87 | 0.43943 | 7333 P  | 1.115  | 16.2  | 0.35815 | 6987  |
| Ywhaz         | A_52_P644465 | AK050511     | tyrosine 3-monooxygenase/tryptophan 5       | 1.304 | 45.92 | 0.47135 | 8619 P  | 1.222  | 3.82  | 0.06486 | 2275  |
| Zyx           | A_51_P473252 | NM_011777    | zyxin                                       | 1.304 | 53.87 | 0.52866 | 10698 P | -1.074 | 28.13 | 0.19142 | 4757  |
| Atp1b3        | A_52_P572950 | NM_007502    | ATPase, Na+/K+ transporting, beta 3 poly    | 1.303 | 18.5  | 0.2678  | 1110 P  | 1.115  | 11.33 | 0.2196  | 5201  |
| Fhl5          | A_51_P465843 | NM_021318    | four and a half LIM domains 5               | 1.303 |       | 0.75532 | 11336 A | 1.101  | 9.71  | 0.09454 | 2991  |
| Rpl17         | A_52_P123268 | NM_001002239 | ribosomal protein L17                       | 1.303 | 42.28 | 0.50298 | 7967 M  | 1.14   | 9.71  | 0.17836 | 4545  |
| 2610024E20Rik | A_52_P666824 | NM_146084    | RIKEN cDNA 2610024E20 gene                  | 1.302 | 38.68 | 0.39279 | 6239 P  | 1.173  | 3.82  | 0.04505 | 1671  |
| Epha3         | A_52_P276955 | NM_010140    | Eph receptor A3                             | 1.302 | 42.28 | 0.40939 | 6709 P  | 1.094  | 13.58 | 0.21503 | 5123  |
| Ftl1          | A_52_P501733 | NM_010240    | ferritin light chain 1                      | 1.302 | 49.93 | 0.56327 | 9556 M  | -1.18  | 1.62  | 0.03516 | 1353  |
| Slc11a2       | A_51_P388737 | NM_008732    | solute carrier family 11 (proton-coupled c  | 1.302 | 42.28 | 0.42597 | 7239 P  | 1.061  | 19.02 | 0.22274 | 5252  |
| Apln          | A_51_P209327 | NM_013912    | apelin                                      | 1.301 | 57.76 | 0.58584 | 12817 P | 1.002  | 42.43 | 0.98171 | 12869 |
| St8sia4       | A_51_P236267 | NM_009183    | ST8 alpha-N-acetyl-neuraminide alpha-2,     | 1.301 | 65.79 | 0.66333 | 16722 P | 1.032  | 33.49 | 0.60143 | 9465  |
| Vps29         | A_52_P456071 | NM_019780    | vacuolar protein sorting 29 (S. pombe)      | 1.301 | 49.93 | 0.49715 | 9518 P  | -1.062 | 42.43 | 0.49735 | 8552  |
| 2610036L11Rik | A_52_P609024 | AK141272     | RIKEN cDNA 2610036L11 gene                  | 1.3   | 23.47 | 0.29354 | 3686 P  | 1.127  | 6.98  | 0.05375 | 1972  |
| 2810410C14Rik | A_52_P18775  | NM_175471    | RIKEN cDNA 2810410C14 gene                  | 1.3   | 38.68 | 0.38487 | 6039 P  | -1.243 | 0.56  | 0.01004 | 379   |
| Calm2         | A_52_P402305 | NM_007589    | calmodulin 2                                | 1.3   | 38.68 | 0.50041 | 7874 M  | 1.284  | 3.01  | 0.07093 | 2415  |
| Huwe1         | A_52_P617552 | AK031374     | HECT, UBA and WWE domain containing 3       | 1.3   | 35.45 | 0.36107 | 5419 P  | 1.1    | 9.71  | 0.1166  | 3412  |
| Dcxr          | A_52_P98100  | AK161732     | dicarbonyl L-xylulose reductase             | 1.299 | 45.92 | 0.423   | 6228 M  | -1.005 | 49.48 | 0.92231 | 12285 |
| Gli2          | A_52_P357829 | XM_136212    | GLI-Kruppel family member GLI2              | 1.299 |       | 0.49841 | 7470 A  | -1.06  | 38.4  | 0.32562 | 6620  |
| Mgat1         | A_52_P90337  | NM_010794    | mannoside acetylglucosaminyltransferase     | 1.299 | 61.79 | 0.636   | 15532 M | 1.086  | 28.13 | 0.65026 | 9885  |
| Rab36         | A_52_P247057 | NM_029781    | RAB36, member RAS oncogene family           | 1.299 | 57.76 | 0.59721 | 12719 P | 1.03   | 33.49 | 0.5498  | 9018  |
| Rps19         | A_52_P129131 | AK031403     | ribosomal protein S19                       | 1.299 |       | 0.8462  | 11439 A | -1.014 | 49.48 | 0.83739 | 11509 |
| Slit3         | A_51_P301809 | NM_011412    | slit homolog 3 (Drosophila)                 | 1.299 | 65.79 | 0.66121 | 16623 P | 1.008  | 42.43 | 0.91405 | 12210 |
| 1700020O03Rik | A_52_P303595 | NM_027405    | RIKEN cDNA 1700020O03 gene                  | 1.298 | 25.79 | 0.29894 | 3827 P  | -1.065 | 40.63 | 0.41683 | 7705  |
| 2310021P13Rik | A_51_P402805 | AK029263     | RIKEN cDNA 2310021P13 gene                  | 1.298 | 49.93 | 0.5101  | 9945 P  | -1.003 | 49.48 | 0.93769 | 12455 |
| Ankrd24       | A_52_P351758 | AK019475     | ankyrin repeat domain 24                    | 1.298 | 53.87 | 0.52694 | 10604 P | 1.106  | 11.33 | 0.14642 | 3972  |
| Elf4          | A_51_P448856 | NM_019680    | E74-like factor 4 (ets domain transcrip     | 1.298 | 38.68 | 0.39458 | 6339 M  | 1.137  | 5.75  | 0.04155 | 1571  |
| Jagn1         | A_51_P150608 | NM_026365    | jagunal homolog 1 (Drosophila)              | 1.298 | 23.47 | 0.29098 | 3637 P  | 1.119  | 8.32  | 0.10123 | 3130  |
| Pex13         | A_52_P322555 | NM_023651    | peroxisomal biogenesis factor 13            | 1.298 | 42.28 | 0.43073 | 7385 P  | -1.024 | 48.39 | 0.66718 | 10022 |
| Rnf24         | A_51_P339356 | NM_178607    | ring finger protein 24                      | 1.298 | 53.87 | 0.40489 | 6387 P  | 1.097  | 11.33 | 0.1233  | 3567  |



|               |              |              |                                             |       |       |         |         |        |       |         |       |
|---------------|--------------|--------------|---------------------------------------------|-------|-------|---------|---------|--------|-------|---------|-------|
| Rpl27a        | A_51_P132459 | NM_011975    | ribosomal protein L27a                      | 1.298 | 45.92 | 0.45858 | 8159 P  | 1.074  | 19.02 | 0.29008 | 6211  |
| Wdr55         | A_51_P381743 | NM_026464    | WD repeat domain 55                         | 1.298 | 23.47 | 0.2894  | 3612 P  | -1.227 | 0.75  | 0.03963 | 1337  |
| Anxa5         | A_51_P426754 | NM_009673    | annexin A5                                  | 1.297 | 35.45 | 0.44185 | 7413 P  | 1.404  | 0.75  | 0.01469 | 628   |
| Arid5b        | A_52_P660812 | BC082312     |                                             | 1.297 | 38.68 | 0.39458 | 6347 P  | 1.01   | 42.43 | 0.8769  | 11826 |
| C1galt1c1     | A_52_P382376 | AK161729     | C1GALT1-specific chaperone 1                | 1.297 | 65.79 | 0.5115  | 9167 M  | 1.016  | 42.43 | 0.8965  | 12026 |
| Plod2         | A_51_P396570 | NM_011961    | procollagen lysine, 2-oxoglutarate 5-dioxy  | 1.296 | 35.45 | 0.37747 | 5844 P  | 1.112  | 9.71  | 0.12728 | 3650  |
| 2610036D13Rik | A_52_P24382  | NM_029282    | RIKEN cDNA 2610036D13 gene                  | 1.295 | 28.61 | 0.32338 | 4456 P  | 1.092  | 8.32  | 0.07325 | 2482  |
| 4930534B04Rik | A_51_P355258 | NM_181815    | RIKEN cDNA 4930534B04 gene                  | 1.295 | 61.79 | 0.61819 | 14299 P | 1.032  | 30.75 | 0.47083 | 8211  |
| Atp1f1        | A_52_P276412 | AK011886     | ATPase inhibitory factor 1                  | 1.295 | 53.87 | 0.52599 | 10558 P | 1.007  | 42.43 | 0.90099 | 12096 |
| Oxct1         | A_52_P430058 | NM_024188    | 3-oxoacid CoA transferase 1                 | 1.295 | 45.92 | 0.44572 | 7816 P  | 1.108  | 9.71  | 0.12199 | 3545  |
| Ppt2          | A_52_P238816 | NM_019441    | palmitoyl-protein thioesterase 2            | 1.295 | 35.45 | 0.3596  | 5391 P  | 1.112  | 8.32  | 0.07152 | 2423  |
| Tarsl1        | A_52_P392591 | NM_027931    | threonyl-tRNA synthetase 2, mitochondri     | 1.295 | 53.87 | 0.53797 | 10974 P | 1.017  | 40.63 | 0.73205 | 10592 |
| Api5          | A_52_P644903 | AK078801     | apoptosis inhibitor 5                       | 1.294 | 65.79 | 0.69097 | 17960 P | 1.139  | 6.98  | 0.09226 | 2951  |
| Ctsd          | A_51_P384629 | NM_009983    | cathepsin D                                 | 1.294 | 45.92 | 0.4705  | 7861 P  | -1.071 | 33.49 | 0.26935 | 5946  |
| Adora1        | A_52_P172272 | NM_001008533 | adenosine A1 receptor                       | 1.293 | 45.92 | 0.45812 | 8142 P  | -1.349 | 0.51  | 0.00584 | 54    |
| BC005537      | A_52_P561394 | AK051292     | cDNA sequence BC005537                      | 1.293 | 45.92 | 0.45467 | 8040 P  | 1.215  | 3.01  | 0.02835 | 1152  |
| Blm           | A_51_P314418 | NM_007550    | Bloom syndrome homolog (human)              | 1.293 | 53.87 | 0.51911 | 10317 P | 1.006  | 42.43 | 0.91088 | 12197 |
| Cxcl2         | A_51_P217463 | NM_009140    | chemokine (C-X-C motif) ligand 2            | 1.293 | 81.02 | 0.89894 | 30907 P | -1.087 | 36.07 | 0.42186 | 7747  |
| Gabarap       | A_51_P295312 | NM_019749    | gamma-aminobutyric acid receptor assoc      | 1.293 | 45.92 | 0.53391 | 8816 M  | 1.117  | 11.33 | 0.21111 | 5056  |
| Pknox1        | A_52_P431894 | NM_016670    | Pbx/knotted 1 homeobox                      | 1.293 | 31.88 | 0.34379 | 4980 P  | -1.01  | 49.48 | 0.91764 | 12244 |
| Vat1          | A_52_P79639  | NM_012037    | vesicle amine transport protein 1 homolo    | 1.293 | 49.93 | 0.48536 | 9083 P  | 1.113  | 9.71  | 0.11104 | 3295  |
| 8030451K01Rik | A_52_P320202 | AK220477     | RIKEN cDNA 8030451K01 gene                  | 1.292 | 38.68 | 0.39534 | 6399 P  | -1.027 | 46.85 | 0.59776 | 9432  |
| Mrg1          | A_52_P277641 | NM_010825    | myeloid ecotropic viral integration site-re | 1.292 | 20.94 | 0.29057 | 3635 P  | 1.622  | 0.24  | 0.00661 | 193   |
| Nr2f1         | A_52_P275700 | NM_010151    | nuclear receptor subfamily 2, group F, me   | 1.292 | 57.76 | 0.55863 | 11684 P | 1.125  | 8.32  | 0.1018  | 3140  |
| Prkra         | A_51_P345836 | NM_011871    | protein kinase, interferon inducible doubl  | 1.292 | 18.5  | 0.27843 | 3403 P  | -1.129 | 6.98  | 0.08461 | 2778  |
| Anxa1         | A_51_P283590 | NM_010730    | annexin A1                                  | 1.291 | 79.26 | 0.89437 | 30616 P | 1.006  | 42.43 | 0.9352  | 12435 |
| Ccb12         | A_51_P392577 | NM_173763    | cysteine conjugate-beta lyase 2             | 1.291 | 77.44 | 0.83703 | 26876 P | 1.053  | 25.31 | 0.45011 | 7993  |
| D1Erttd161e   | A_52_P110646 | NM_026187    | DNA segment, Chr 1, ERATO Doi 161, expi     | 1.291 | 42.28 | 0.41016 | 6741 P  | 1.104  | 8.32  | 0.06487 | 2280  |
| Pafah1b2      | A_51_P461844 | NM_008775    | platelet-activating factor acetylhydrolase, | 1.291 | 53.87 | 0.53699 | 10940 P | 1.127  | 9.71  | 0.12852 | 3664  |
| D3Erttd300e   | A_51_P362771 | NM_019995    | DNA segment, Chr 3, ERATO Doi 300, expi     | 1.29  | 53.87 | 0.51659 | 10200 P | -1.045 | 40.63 | 0.31099 | 6471  |
| E130308A19Rik | A_51_P109541 | NM_001015681 | RIKEN cDNA E130308A19 gene                  | 1.29  | 25.79 | 0.30372 | 3951 P  | 1.084  | 13.58 | 0.20476 | 4961  |
| ldh3g         | A_51_P136729 | NM_008323    | isocitrate dehydrogenase 3 (NAD+), gamn     | 1.29  | 38.68 | 0.49177 | 7610 M  | -1.022 | 48.39 | 0.66366 | 9994  |
| Jam2          | A_52_P374846 | NM_023844    | junction adhesion molecule 2                | 1.29  | 49.93 | 0.48372 | 9034 P  | -1.013 | 49.48 | 0.83992 | 11528 |
| Prdx6         | A_52_P388359 | NM_007453    | peroxiredoxin 6                             | 1.29  | 49.93 | 0.49961 | 9245 P  | 1.021  | 38.4  | 0.70707 | 10384 |
| Sgpp1         | A_52_P42221  | NM_030750    | sphingosine-1-phosphate phosphatase 1       | 1.29  | 23.47 | 0.29875 | 3801 P  | 1.207  | 5.75  | 0.11855 | 3450  |
| Smarca1       | A_51_P461404 | NM_053123    | SWI/SNF related, matrix associated, actin   | 1.29  | 53.87 | 0.52791 | 10655 P | 1.206  | 3.46  | 0.04256 | 1601  |
| Synj2         | A_52_P188172 | NM_011523    | synaptojanin 2                              | 1.29  | 20.94 | 0.28615 | 3534 P  | 1.012  | 42.43 | 0.88003 | 11859 |
| Bmf           | A_52_P78830  | NM_138313    | Bcl2 modifying factor                       | 1.289 |       | 0.76761 | 11654 A | 1.091  | 13.58 | 0.16853 | 4360  |
| Evi2b         | A_52_P508999 | NM_146023    | ecotropic viral integration site 2b         | 1.289 |       | 0.69651 | 11694 A | -1.002 | 49.48 | 0.97107 | 12755 |
| 2010315L10Rik | A_52_P181235 | NM_025917    | RIKEN cDNA 2010315L10 gene                  | 1.288 | 53.87 | 0.55338 | 11543 P | 1.048  | 33.49 | 0.66531 | 10004 |
| Celsr1        | A_51_P440743 | NM_009886    | cadherin EGF LAG seven-pass G-type rece     | 1.288 | 72.2  | 0.75317 | 21297 P | -1.061 | 36.07 | 0.29307 | 6257  |
| Cyca          | A_51_P261671 | NM_007808    | cytochrome c, somatic                       | 1.288 | 45.92 | 0.44972 | 7905 P  | 1.075  | 19.02 | 0.28401 | 6138  |
| Rwdd2         | A_52_P554436 | NM_027100    | RWD domain containing 2                     | 1.288 | 45.92 | 0.45944 | 8193 P  | -1.011 | 49.48 | 0.81977 | 11354 |
| C920006C10Rik | A_52_P298593 | AK052176     | RIKEN cDNA C920006C10 gene                  | 1.287 | 49.93 | 0.47485 | 8790 P  | 1.087  | 11.33 | 0.13454 | 3753  |
| Golt1b        | A_52_P37665  | NM_025872    | golgi transport 1 homolog B (S. cerevisiae  | 1.287 | 42.28 | 0.43224 | 7407 P  | 1.022  | 42.43 | 0.85845 | 11668 |
| Ptpn21        | A_52_P329825 | NM_011877    | protein tyrosine phosphatase, non-recept    | 1.287 | 23.47 | 0.29829 | 3784 P  | 1.167  | 3.82  | 0.03362 | 1307  |
| Ttc3          | A_51_P137947 | NM_009441    | tetratricopeptide repeat domain 3           | 1.287 | 38.68 | 0.39694 | 6172 P  | 1.067  | 25.31 | 0.45153 | 8006  |
| 5330401P04Rik | A_52_P51854  | NM_172654    | RIKEN cDNA 5330401P04 gene                  | 1.286 | 57.76 | 0.57565 | 12295 P | -1.055 | 38.4  | 0.2923  | 6242  |
| Arhgap12      | A_51_P214837 | NM_001039692 | RHO GTPase activating protein 12            | 1.286 | 49.93 | 0.49273 | 9359 P  | 1.127  | 6.98  | 0.06279 | 2227  |
| B930042K01Rik | A_52_P113345 | AK040303     | RIKEN cDNA B930042K01 gene                  | 1.286 | 77.44 | 0.8594  | 28196 P | -1.013 | 49.48 | 0.77614 | 10960 |
| Bub3          | A_52_P110040 | NM_009774    | budding uninhibited by benzimidazoles 3     | 1.286 | 20.94 | 0.28891 | 3606 P  | 1.013  | 42.43 | 0.79824 | 11165 |
| Cobl          | A_52_P451485 | NM_172496    | cordons-bleu                                | 1.286 | 49.93 | 0.4977  | 9544 P  | 1.01   | 42.43 | 0.80954 | 11274 |
| Ctsb          | A_51_P465148 | NM_007798    | cathepsin B                                 | 1.286 | 53.87 | 0.60426 | 10833 M | 1.143  | 5.75  | 0.05931 | 2128  |

|               |              |                    |                                             |       |       |         |         |        |       |         |       |
|---------------|--------------|--------------------|---------------------------------------------|-------|-------|---------|---------|--------|-------|---------|-------|
| Dbp           | A_51_P180492 | NM_016974          | D site albumin promoter binding protein     | 1.286 | 77.44 | 0.83451 | 26581 P | -1.067 | 33.49 | 0.27701 | 6053  |
| Mthfs         | A_51_P338197 | AK081946           | 5, 10-methenyltetrahydrofolate synthetas    | 1.286 | 57.76 | 0.58539 | 12791 P | -1.197 | 1.18  | 0.01749 | 747   |
| Rpl7          | A_51_P496480 | NM_011291          | ribosomal protein L7                        | 1.286 | 42.28 | 0.42074 | 7050 P  | 1.084  | 16.2  | 0.26507 | 5873  |
| Ncor1         | A_51_P457744 | AK038502           | nuclear receptor co-repressor 1             | 1.285 | 23.47 | 0.29819 | 3775 P  | -1.2   | 1.18  | 0.01947 | 822   |
| Rpl10         | A_51_P495895 | NM_052835          | ribosomal protein 10                        | 1.285 | 23.47 | 0.43969 | 6314 M  | 1.081  | 19.02 | 0.31065 | 6457  |
| BC054438      | A_51_P397446 | AK038244           | cDNA sequence BC054438                      | 1.284 | 42.28 | 0.42805 | 7294 P  | 1.081  | 25.31 | 0.52202 | 8770  |
| Commd8        | A_52_P112721 | NM_178599          | COMM domain containing 8                    | 1.284 | 53.87 | 0.54468 | 11188 P | -1.149 | 4.63  | 0.07628 | 2562  |
| Ppp1r9a       | A_52_P159490 | NM_181595          | protein phosphatase 1, regulatory (inhibit  | 1.284 | 42.28 | 0.42199 | 7103 P  | 1.07   | 16.2  | 0.23272 | 5390  |
| Cugbp2        | A_51_P182471 | NM_010160          | CUG triplet repeat, RNA binding protein 2   | 1.283 | 42.28 | 0.52633 | 8578 M  | 1.042  | 28.13 | 0.45234 | 8021  |
| Tnfrsf1a      | A_52_P192426 | NM_011609          | tumor necrosis factor receptor superfami    | 1.283 | 61.79 | 0.62451 | 14675 P | 1.133  | 8.32  | 0.08819 | 2850  |
| Pde1a         | A_51_P327016 | NM_016744          | phosphodiesterase 1A, calmodulin-deper      | 1.282 | 42.28 | 0.41931 | 7003 P  | 1.023  | 38.4  | 0.69683 | 10290 |
| Pemt          | A_51_P193093 | NM_008819          | phosphatidylethanolamine N-methyltrans      | 1.281 | 45.92 | 0.4714  | 8628 P  | -1.022 | 49.22 | 0.75804 | 10853 |
| Spin          | A_51_P195135 | NM_011462          | spindlin 1                                  | 1.281 | 31.88 | 0.47364 | 7156 M  | 1.11   | 9.71  | 0.11077 | 3284  |
| Lmo2          | A_51_P223686 | NM_008505          | LIM domain only 2                           | 1.28  | 57.76 | 0.5773  | 12372 P | 1.067  | 16.2  | 0.16315 | 4274  |
| Mthfd2        | A_52_P184149 | NM_008638          | methylenetetrahydrofolate dehydrogenas      | 1.28  | 53.87 | 0.51595 | 10165 P | -1.073 | 28.13 | 0.21652 | 5144  |
| Sumo1         | A_52_P236354 | AK020140           |                                             | 1.28  |       | 0.76231 | 17567 A | 1.084  | 28.13 | 0.66863 | 10031 |
| Hrsp12        | A_52_P59681  | NM_008287          | heat-responsive protein 12                  | 1.279 | 53.87 | 0.51764 | 10231 P | 1.102  | 11.33 | 0.16591 | 4308  |
| Mdm4          | A_52_P174937 | NM_008575          | transformed mouse 3T3 cell double minu      | 1.279 | 57.76 | 0.59334 | 13093 P | 1.097  | 19.02 | 0.39909 | 7506  |
| Ncald         | A_52_P673722 | NM_134094          | neurocalcin delta                           | 1.279 | 49.93 | 0.48167 | 9000 P  | 1.193  | 6.98  | 0.13679 | 3785  |
| Nrp1          | A_52_P174942 | AK040447           | neuropilin 1                                | 1.279 | 77.44 | 0.63941 | 13656 M | 1.178  | 5.75  | 0.10129 | 3132  |
| Sema4a        | A_51_P195066 | NM_013658          | sema domain, immunoglobulin domain (I       | 1.279 | 25.79 | 0.31599 | 4269 P  | 1.091  | 11.33 | 0.13908 | 3828  |
| Ubl4          | A_52_P637730 | NM_145405          | ubiquitin-like 4                            | 1.279 | 45.92 | 0.47123 | 8611 P  | -1.082 | 19.02 | 0.12604 | 3630  |
| Wif1          | A_51_P484526 | NM_011915          | Wnt inhibitory factor 1                     | 1.279 | 72.2  | 0.58616 | 12228 M | 1.045  | 25.31 | 0.36472 | 7087  |
| Hook1         | A_52_P13897  | NM_030014          | hook homolog 1 (Drosophila)                 | 1.278 | 49.93 | 0.4726  | 8673 P  | 1.111  | 8.32  | 0.08211 | 2708  |
| Psat1         | A_51_P317427 | NM_177420          | phosphoserine aminotransferase 1            | 1.278 | 75.14 | 0.79387 | 23755 P | 1.193  | 8.32  | 0.22782 | 5330  |
| Syn1          | A_51_P420684 | NM_013680          | synapsin I                                  | 1.278 | 57.76 | 0.59334 | 13096 P | -1.337 | 0.51  | 0.00731 | 251   |
| Gns           | A_52_P408476 | NM_029364          | glucosamine (N-acetyl)-6-sulfatase          | 1.277 | 42.28 | 0.41841 | 6979 P  | 1.141  | 8.32  | 0.12865 | 3673  |
| Tex10         | A_52_P221696 | AK132870           | testis expressed gene 10                    | 1.277 | 45.92 | 0.4705  | 8552 P  | -1.083 | 19.02 | 0.12552 | 3619  |
| Tor3a         | A_52_P52357  | BC052851           | torsin family 3, member A                   | 1.276 | 38.68 | 0.38867 | 6151 P  | -1.001 | 49.48 | 0.97856 | 12829 |
| 2900064A13Rik | A_51_P204286 | AK033552           | RIKEN cDNA 2900064A13 gene                  | 1.275 | 35.45 | 0.37114 | 5644 P  | 1.032  | 36.07 | 0.70826 | 10391 |
| Entpd6        | A_51_P379399 | NM_172117          | ectonucleoside triphosphate diphosphoh      | 1.275 | 42.28 | 0.42411 | 7186 P  | 1.124  | 11.33 | 0.19966 | 4897  |
| Gls           | A_51_P488024 | AK031899           | glutaminase                                 | 1.275 | 28.61 | 0.33299 | 4741 P  | 1.215  | 3.82  | 0.07233 | 2449  |
| Pogk          | A_52_P476690 | NM_175170          | pogo transposable element with KRAB do      | 1.275 | 31.88 | 0.34854 | 5075 P  | -1.038 | 44.4  | 0.47798 | 8286  |
| Zfp566        | A_51_P437478 | NM_152814          | zinc finger protein 566                     | 1.275 | 38.68 | 0.38958 | 6169 P  | -1.057 | 38.4  | 0.32773 | 6646  |
| BC026657      | A_51_P304002 | AK020491           | enhancer trap locus 4                       | 1.274 | 61.79 | 0.65199 | 16172 P | 1.042  | 28.13 | 0.37996 | 7279  |
| Crp           | A_51_P105554 | NM_007768          | C-reactive protein, pentraxin-related       | 1.274 | 57.76 | 0.49334 | 9005 P  | 1.147  | 8.32  | 0.15301 | 4088  |
| Hcn3          | A_52_P655508 | ENSMUST00000029686 | hyperpolarization-activated, cyclic nucleo  | 1.274 | 45.92 | 0.45434 | 8031 P  | -1.081 | 25.31 | 0.20732 | 5011  |
| Rps15a        | A_52_P577019 | NM_170669          | ribosomal protein S15a                      | 1.274 | 45.92 | 0.55478 | 9363 M  | -1.022 | 49.48 | 0.82999 | 11450 |
| Tfpi          | A_51_P383210 | AF016313           | tissue factor pathway inhibitor             | 1.274 |       | 0.67422 | 12680 A | 1.109  | 13.58 | 0.25347 | 5708  |
| Araf          | A_52_P673489 | AK133797           | v-raf murine sarcoma 3611 viral oncogene    | 1.273 | 49.93 | 0.47299 | 8711 P  | 1.218  | 2.53  | 0.02327 | 979   |
| Cln8          | A_52_P541134 | NM_012000          | ceroid-lipofuscinosis, neuronal 8           | 1.273 | 38.68 | 0.39526 | 6375 P  | 1.11   | 9.71  | 0.09869 | 3079  |
| Dhcr24        | A_51_P482711 | NM_053272          | 24-dehydrocholesterol reductase             | 1.273 | 72.2  | 0.76477 | 21899 P | -1.12  | 8.32  | 0.08456 | 2776  |
| Prdm5         | A_51_P347448 | NM_027547          | PR domain containing 5                      | 1.273 | 57.76 | 0.58248 | 12646 P | -1.003 | 49.48 | 0.94037 | 12481 |
| Ptpn11        | A_52_P641185 | NM_011202          | protein tyrosine phosphatase, non-recept    | 1.273 | 28.61 | 0.32974 | 4664 P  | 1.035  | 30.75 | 0.50929 | 8668  |
| Camk2d        | A_52_P428745 | NM_001025439       | calcium/calmodulin-dependent protein ki     | 1.272 | 31.88 | 0.34833 | 5071 P  | -1.006 | 49.48 | 0.90494 | 12144 |
| Wdr1          | A_51_P184773 | NM_011715          | WD repeat domain 1                          | 1.272 | 77.44 | 0.8411  | 20133 M | 1.262  | 1.58  | 0.01485 | 637   |
| Mpp2          | A_51_P462978 | NM_016695          | membrane protein, palmitoylated 2 (MAC      | 1.271 | 61.79 | 0.60765 | 13810 P | -1.002 | 49.48 | 0.97747 | 12816 |
| Adamts18      | A_52_P488683 | AK035797           | a disintegrin-like and metallopeptidase (n  | 1.27  | 38.68 | 0.3999  | 6514 P  | 1.008  | 42.43 | 0.92002 | 12274 |
| Ak1           | A_51_P452876 | NM_021515          | adenylate kinase 1                          | 1.27  | 38.68 | 0.39483 | 6369 P  | 1.149  | 9.71  | 0.17362 | 4438  |
| AW124694      | A_51_P319551 | AK149180           | kinesin family member 3A                    | 1.27  | 38.68 | 0.38777 | 6118 P  | 1.245  | 4.63  | 0.12625 | 3640  |
| Crsp3         | A_52_P596054 | AK028545           | cofactor required for Sp1 transcriptional a | 1.27  | 31.88 | 0.34944 | 5109 P  | 1.013  | 42.43 | 0.7994  | 11173 |
| Grik1         | A_51_P282609 | NM_146072          | glutamate receptor, ionotropic, kainate 1   | 1.27  |       | 0.64363 | 10236 A | 1.039  | 25.31 | 0.35632 | 6968  |
| Stxbp5        | A_52_P234695 | XM_896388          | syntaxin binding protein 5 (tomosyn)        | 1.27  | 20.94 | 0.30377 | 3962 P  | 1.001  | 42.43 | 0.97941 | 12834 |



|               |              |              |                                                     |       |       |         |         |        |       |         |       |
|---------------|--------------|--------------|-----------------------------------------------------|-------|-------|---------|---------|--------|-------|---------|-------|
| Tal1          | A_51_P255853 | NM_011527    | T-cell acute lymphocytic leukemia 1                 | 1.27  | 57.76 | 0.58746 | 12888 P | 1      | 49.48 | 0.99892 | 13057 |
| Zfp423        | A_51_P328439 | NM_033327    | zinc finger protein 423                             | 1.27  | 57.76 | 0.60731 | 13060 P | -1.048 | 42.43 | 0.36458 | 7082  |
| Acy1          | A_51_P166288 | NM_025371    | aminoacylase 1                                      | 1.269 | 49.93 | 0.49512 | 9443 P  | 1.001  | 42.43 | 0.9932  | 13004 |
| Eya4          | A_52_P295933 | AK045060     | eyes absent 4 homolog (Drosophila)                  | 1.269 | 69.29 | 0.62328 | 13778 P | 1.095  | 9.71  | 0.08213 | 2709  |
| Fbxo25        | A_51_P324551 | NM_025785    | F-box protein 25                                    | 1.269 | 45.92 | 0.45291 | 8000 P  | 1.091  | 11.33 | 0.12116 | 3513  |
| Itn2b         | A_52_P99411  | NM_008410    | integral membrane protein 2B                        | 1.269 | 31.88 | 0.48647 | 7479 M  | 1.152  | 5.75  | 0.05211 | 1917  |
| Khdrbs2       | A_51_P223724 | NM_133235    | KH domain containing, RNA binding, signal           | 1.269 | 65.79 | 0.6915  | 18009 P | -1.309 | 0.92  | 0.03814 | 1443  |
| Mthfd1        | A_52_P282279 | NM_138745    | methylenetetrahydrofolate dehydrogenase             | 1.269 | 35.45 | 0.37749 | 5865 P  | 1.2    | 4.63  | 0.08606 | 2795  |
| Prnpip1       | A_52_P616591 | NM_080469    | prion protein interacting protein 1                 | 1.269 | 38.68 | 0.38483 | 6031 P  | -1.006 | 49.48 | 0.96755 | 12724 |
| Tomm70a       | A_51_P520660 | NM_138599    | translocase of outer mitochondrial membrane         | 1.269 | 31.88 | 0.35734 | 5345 P  | 1.042  | 25.31 | 0.3307  | 6682  |
| Ero1l         | A_51_P481693 | NM_015774    | ERO1-like (S. cerevisiae)                           | 1.268 | 49.93 | 0.50238 | 9727 P  | 1.198  | 3.82  | 0.05148 | 1894  |
| Hoxa2         | A_51_P501803 | NM_010451    | homeo box A2                                        | 1.268 | 75.14 | 0.81907 | 25366 P | 1.106  | 9.71  | 0.11412 | 3369  |
| Adra2c        | A_52_P428345 | NM_007418    | adrenergic receptor, alpha 2c                       | 1.267 | 79.26 | 0.81115 | 23421 M | 1.101  | 6.98  | 0.05742 | 2077  |
| As3mt         | A_51_P282227 | NM_020577    | arsenic (+3 oxidation state) methyltransferase      | 1.267 | 42.28 | 0.42204 | 7105 P  | -1.001 | 49.48 | 0.98123 | 12857 |
| Jmjd1a        | A_52_P133965 | NM_001038695 | jumonji domain containing 1A                        | 1.267 | 31.88 | 0.35723 | 5334 P  | 1.076  | 25.31 | 0.498   | 8557  |
| B230112C05Rik | A_52_P488623 | XM_619141    | RIKEN cDNA B230112C05 gene                          | 1.266 | 35.45 | 0.36532 | 5503 P  | 1.09   | 11.33 | 0.11329 | 3343  |
| Pfdn5         | A_52_P208604 | NM_027044    | prefoldin 5                                         | 1.266 | 49.93 | 0.51637 | 8858 M  | -1.055 | 44.4  | 0.62786 | 9701  |
| AW060207      | A_51_P378558 | NM_144911    | expressed sequence AW060207                         | 1.265 | 35.45 | 0.37749 | 5850 P  | -1.113 | 8.32  | 0.07782 | 2596  |
| Cops2         | A_52_P259087 | NM_009939    | COP9 (constitutive photomorphogenic) homolog        | 1.265 | 45.92 | 0.45956 | 8203 P  | 1.04   | 30.75 | 0.54902 | 9012  |
| Eif3s5        | A_51_P516452 | NM_025344    | eukaryotic translation initiation factor 3, subunit | 1.265 | 42.28 | 0.41219 | 6827 P  | -1.067 | 36.07 | 0.33104 | 6686  |
| Fyn           | A_51_P177667 | NM_008054    | Fyn proto-oncogene                                  | 1.265 | 49.93 | 0.48078 | 8967 P  | 1.001  | 42.43 | 0.98392 | 12908 |
| Rps3          | A_51_P318642 | NM_012052    | ribosomal protein S3                                | 1.265 | 38.68 | 0.5132  | 8201 M  | 1.149  | 11.33 | 0.2964  | 6286  |
| Eif4b         | A_52_P390114 | NM_145625    | eukaryotic translation initiation factor 4B         | 1.264 | 53.87 | 0.54252 | 11093 P | 1.149  | 8.32  | 0.11515 | 3384  |
| Mast2         | A_52_P261151 | AK086418     | microtubule associated serine/threonine kinase      | 1.264 | 69.29 | 0.73001 | 17395 M | -1.036 | 45.68 | 0.59197 | 9352  |
| Mphosph10     | A_52_P463578 | NM_026483    | M-phase phosphoprotein 10 (U3 small nuclear         | 1.264 | 23.47 | 0.31651 | 4279 P  | -1.002 | 49.48 | 0.9753  | 12790 |
| Prdx5         | A_51_P174591 | NM_012021    | peroxiredoxin 5                                     | 1.264 | 45.92 | 0.43972 | 7635 P  | -1.227 | 1.1   | 0.01999 | 851   |
| Zfp91         | A_52_P301243 | AK040976     | zinc finger protein 91                              | 1.264 | 28.61 | 0.33591 | 4805 P  | 1.003  | 42.43 | 0.96856 | 12729 |
| O610037L13Rik | A_52_P613953 | NM_028754    | RIKEN cDNA O610037L13 gene                          | 1.263 | 49.93 | 0.47157 | 8633 P  | 1.09   | 13.58 | 0.16182 | 4257  |
| 2310061C15Rik | A_51_P140368 | NM_026844    | RIKEN cDNA 2310061C15 gene                          | 1.263 | 61.79 | 0.61828 | 14311 P | -1.025 | 47.43 | 0.62359 | 9653  |
| Anapc1        | A_52_P384594 | AK090134     | anaphase promoting complex subunit 1                | 1.263 | 53.87 | 0.53827 | 11000 P | 1.124  | 6.98  | 0.05733 | 2072  |
| Arl6ip1       | A_51_P301964 | NM_019419    | ADP-ribosylation factor-like 6 interacting protein  | 1.263 | 45.92 | 0.45812 | 8141 P  | 1.073  | 16.2  | 0.23272 | 5393  |
| Bckdha        | A_51_P466148 | NM_007533    | branched chain ketoacid dehydrogenase E1            | 1.263 | 23.47 | 0.31825 | 4330 P  | -1.219 | 0.66  | 0.01045 | 399   |
| Cited2        | A_51_P478548 | U86445       | Cbp/p300-interacting transactivator, with           | 1.263 | 69.29 | 0.73204 | 20348 P | -1.042 | 43.75 | 0.42795 | 7800  |
| Map1lc3b      | A_51_P126177 | NM_026160    | microtubule-associated protein 1 light chain        | 1.263 | 28.61 | 0.4082  | 6177 P  | 1.054  | 28.13 | 0.51175 | 8685  |
| Mt1           | A_52_P423810 | AK154954     | metallothionein 1                                   | 1.263 | 49.93 | 0.48724 | 9166 P  | -1.081 | 19.02 | 0.1217  | 3540  |
| Cd2bp2        | A_52_P530958 | NM_027353    | CD2 antigen (cytoplasmic tail) binding protein      | 1.262 | 28.61 | 0.33262 | 4817 P  | 1.07   | 22.1  | 0.36826 | 7140  |
| Hist1h2be     | A_51_P235426 | NM_178194    | histone cluster 1, H2be                             | 1.262 | 49.93 | 0.49127 | 9276 P  | 1.267  | 9.71  | 0.36478 | 7091  |
| Mgea5         | A_52_P504786 | NM_023799    | meningioma expressed antigen 5 (hyaluronate         | 1.262 | 42.28 | 0.43312 | 7445 P  | -1.016 | 49.48 | 0.72735 | 10541 |
| Pcca          | A_51_P484254 | NM_144844    | propionyl-Coenzyme A carboxylase, alpha subunit     | 1.262 | 49.93 | 0.49929 | 9636 P  | 1.011  | 42.43 | 0.84609 | 11575 |
| 4930413O22Rik | A_51_P428595 | AK032310     | centrosome and spindle pole associated protein      | 1.261 | 65.79 | 0.66674 | 16888 P | 1.228  | 5.75  | 0.14879 | 4023  |
| Irx3          | A_51_P518757 | NM_008393    | Iroquois related homeobox 3 (Drosophila)            | 1.261 | 61.79 | 0.61855 | 14364 P | 1.025  | 33.49 | 0.55676 | 9079  |
| Itpr2         | A_51_P468269 | AB012393     | inositol 1,4,5-triphosphate receptor 2              | 1.261 |       | 0.65565 | 10566 A | -1.045 | 43.75 | 0.4574  | 8072  |
| Vrk1          | A_52_P555672 | NM_001029844 | vaccinia related kinase 1                           | 1.261 | 69.29 | 0.7015  | 18467 P | -1.134 | 4.63  | 0.05574 | 2023  |
| Nfic          | A_52_P551496 | NM_026756    | nuclear factor I/C                                  | 1.26  | 57.76 | 0.56391 | 11840 P | 1.053  | 22.1  | 0.28082 | 6099  |
| Rnf20         | A_52_P411401 | AK087860     | ring finger protein 20                              | 1.26  | 49.93 | 0.47299 | 8712 M  | 1.061  | 19.02 | 0.2404  | 5495  |
| Rps7          | A_51_P127545 | NM_011300    | ribosomal protein S7                                | 1.26  | 45.92 | 0.54774 | 9162 M  | 1.04   | 30.75 | 0.53978 | 8939  |
| Brms1l        | A_52_P377703 | NM_001037756 | breast cancer metastasis-suppressor 1-like          | 1.259 | 38.68 | 0.40405 | 6595 P  | 1.051  | 22.1  | 0.26315 | 5856  |
| Akt1          | A_51_P237553 | NM_009652    | thymoma viral proto-oncogene 1                      | 1.258 | 65.79 | 0.68448 | 17640 P | 1.093  | 11.33 | 0.14718 | 3985  |
| Akt3          | A_52_P130835 | NM_011785    | thymoma viral proto-oncogene 3                      | 1.258 | 35.45 | 0.37749 | 5863 P  | 1.18   | 8.32  | 0.20543 | 4979  |
| Bgn           | A_52_P162486 | NM_007542    | biglycan                                            | 1.258 | 57.76 | 0.57961 | 12473 P | -1.05  | 38.4  | 0.27939 | 6085  |
| Eif3s8        | A_52_P455089 | XM_993422    | eukaryotic translation initiation factor 3, subunit | 1.258 | 45.92 | 0.43868 | 7597 P  | -1.122 | 9.71  | 0.12611 | 3631  |
| Lad1          | A_51_P116932 | NM_133664    | ladinin                                             | 1.258 | 75.14 | 0.80746 | 24552 P | -1.038 | 45.05 | 0.5031  | 8610  |
| Nrxn1         | A_52_P362651 | AK037724     | neurexin I                                          | 1.258 | 61.79 | 0.60279 | 13572 P | -1.117 | 8.32  | 0.07903 | 2631  |

|               |              |              |                                              |       |       |         |         |        |       |         |       |
|---------------|--------------|--------------|----------------------------------------------|-------|-------|---------|---------|--------|-------|---------|-------|
| Rtn4rl1       | A_52_P94401  | NM_177708    | reticulum 4 receptor-like 1                  | 1.258 | 31.88 | 0.35661 | 5270 P  | -1.015 | 49.48 | 0.74228 | 10704 |
| Trub2         | A_52_P427064 | NM_145520    | TruB pseudouridine (psi) synthase homolog    | 1.258 | 53.87 | 0.51076 | 9980 P  | -1.003 | 49.48 | 0.94253 | 12505 |
| Cct4          | A_52_P236176 | AK011873     | chaperonin subunit 4 (delta)                 | 1.257 | 53.87 | 0.5359  | 10912 P | 1.496  | 0.24  | 0.00584 | 80    |
| Fbxw2         | A_52_P643001 | BC003834     | F-box and WD-40 domain protein 2             | 1.257 | 35.45 | 0.36771 | 5582 P  | 1.046  | 25.31 | 0.3774  | 7246  |
| Fgfr1op2      | A_52_P493620 | NM_026218    | FGFR1 oncogene partner 2                     | 1.257 | 31.88 | 0.3584  | 5383 P  | 1.176  | 3.82  | 0.04112 | 1558  |
| Gcap14        | A_52_P102798 | NM_027045    | granule cell antiserum positive 14           | 1.257 | 45.92 | 0.44218 | 7711 P  | 1.052  | 30.75 | 0.6066  | 9499  |
| Gpx4          | A_51_P462448 | NM_001037741 | glutathione peroxidase 4                     | 1.257 | 42.28 | 0.43626 | 7519 P  | 1.037  | 28.13 | 0.37227 | 7200  |
| Ipo11         | A_52_P499934 | NM_029665    | importin 11                                  | 1.257 | 25.79 | 0.33064 | 4680 P  | 1.063  | 22.1  | 0.36031 | 7026  |
| Nfe2l2        | A_52_P523835 | AK029360     | nuclear factor, erythroid derived 2, like 2  | 1.257 | 38.68 | 0.39447 | 6311 P  | -1.022 | 49.39 | 0.78625 | 11057 |
| Plscr2        | A_51_P251022 | NM_008880    | phospholipid scramblase 2                    | 1.257 | 61.79 | 0.60024 | 13457 P | 1.108  | 13.58 | 0.30536 | 6387  |
| 9130213B05Rik | A_51_P114577 | AK161172     | RIKEN cDNA 9130213B05 gene                   | 1.256 | 61.79 | 0.6071  | 13765 P | 1.032  | 40.63 | 0.84317 | 11545 |
| Adrbk1        | A_51_P460302 | NM_130863    | adrenergic receptor kinase, beta 1           | 1.256 | 57.76 | 0.54927 | 11393 P | -1.05  | 40.63 | 0.35281 | 6920  |
| D19Bwg1357e   | A_52_P276343 | NM_177474    | DNA segment, Chr 19, Brigham & Women         | 1.256 | 42.28 | 0.42411 | 7178 P  | 1.03   | 33.49 | 0.50427 | 8622  |
| Gna13         | A_52_P185343 | AK011851     | guanine nucleotide binding protein, alpha    | 1.256 | 53.87 | 0.5298  | 10740 P | 1.114  | 11.33 | 0.2123  | 5080  |
| Klhl5         | A_51_P395405 | BC057606     | kelch-like 5 (Drosophila)                    | 1.256 | 69.29 | 0.71151 | 19044 P | 1.035  | 30.75 | 0.50013 | 8580  |
| Nab1          | A_52_P318438 | NM_008667    | Ngfi-A binding protein 1                     | 1.256 | 38.68 | 0.38848 | 6148 P  | 1.044  | 30.75 | 0.60513 | 9493  |
| Sema3e        | A_51_P483438 | NM_011348    | sema domain, immunoglobulin domain (I)       | 1.256 | 38.68 | 0.40631 | 6642 P  | 1.094  | 11.33 | 0.12232 | 3549  |
| Snx27         | A_52_P19329  | AK147452     | sorting nexin family member 27               | 1.255 | 57.76 | 0.6422  | 12482 M | -1.201 | 0.75  | 0.01251 | 528   |
| Tcf21         | A_51_P459944 | NM_011545    | transcription factor 21                      | 1.255 | 53.87 | 0.53279 | 10818 P | 1.056  | 22.1  | 0.29288 | 6250  |
| 5330417C22Rik | A_51_P182131 | NM_001033304 | RIKEN cDNA 5330417C22 gene                   | 1.254 | 45.92 | 0.46836 | 8478 P  | 1.366  | 1.1   | 0.01492 | 641   |
| Kctd5         | A_52_P61758  | NM_027008    | potassium channel tetramerisation doma       | 1.254 | 72.2  | 0.74464 | 20827 P | 1.014  | 42.43 | 0.85811 | 11655 |
| Pygl          | A_51_P452779 | NM_133198    | liver glycogen phosphorylase                 | 1.254 | 57.76 | 0.5773  | 12373 P | -1.116 | 22.1  | 0.2892  | 6202  |
| Rabggtb       | A_51_P314763 | NM_011231    | RAB geranylgeranyl transferase, b subunit    | 1.254 | 69.29 | 0.70847 | 18863 P | 1.143  | 6.98  | 0.08963 | 2885  |
| Serpinb6a     | A_51_P191375 | NM_009254    | serine (or cysteine) peptidase inhibitor, cl | 1.254 | 65.79 | 0.66394 | 16790 P | 1.187  | 6.98  | 0.15575 | 4144  |
| Sugt1         | A_52_P414718 | NM_026474    | SGT1, suppressor of G2 allele of SKP1 (S.    | 1.254 | 42.28 | 0.43495 | 7505 P  | 1.071  | 25.31 | 0.48497 | 8383  |
| Txn15         | A_51_P349878 | NM_026559    | thioredoxin-like 5                           | 1.254 | 31.88 | 0.35713 | 5293 P  | -1.008 | 49.48 | 0.94283 | 12507 |
| Xpo1          | A_52_P89259  | AK052007     | exportin 1, CRM1 homolog (yeast)             | 1.254 | 61.79 | 0.64671 | 15952 P | 1.067  | 16.2  | 0.1791  | 4555  |
| 2010208K18Rik | A_51_P329879 | NM_028095    | RIKEN cDNA 2010208K18 gene                   | 1.253 | 61.79 | 0.63638 | 15547 P | 1.193  | 3.82  | 0.04407 | 1648  |
| Ednrb         | A_51_P262964 | NM_007904    | endothelin receptor type B                   | 1.253 | 31.88 | 0.36016 | 5401 P  | 1.047  | 33.49 | 0.67916 | 10134 |
| Lrrc3b        | A_51_P362089 | NM_146052    | leucine rich repeat containing 3B            | 1.253 | 69.29 | 0.71091 | 19013 P | 1.04   | 28.13 | 0.4147  | 7675  |
| Rpl35a        | A_51_P509107 | NM_021338    | ribosomal protein L35a                       | 1.253 | 57.76 | 0.6422  | 11971 M | -1.016 | 49.48 | 0.89507 | 12010 |
| Tpcn1         | A_52_P476560 | NM_145853    | two pore channel 1                           | 1.253 | 65.79 | 0.68819 | 17844 P | -1.115 | 8.32  | 0.08418 | 2753  |
| Uxs1          | A_51_P501550 | NM_026430    | UDP-glucuronate decarboxylase 1              | 1.253 | 45.92 | 0.44523 | 7797 P  | -1.067 | 40.63 | 0.44094 | 7929  |
| Atrx          | A_51_P413366 | NM_009530    | alpha thalassemia/mental retardation syn     | 1.252 | 57.76 | 0.56738 | 11947 P | 1.196  | 3.82  | 0.06328 | 2240  |
| Dll1          | A_51_P306017 | NM_007865    | delta-like 1 (Drosophila)                    | 1.252 | 53.87 | 0.52764 | 10626 P | 1.082  | 11.33 | 0.11376 | 3356  |
| Eif4e3        | A_52_P287338 | NM_025829    | eukaryotic translation initiation factor 4E  | 1.252 | 65.79 | 0.64966 | 16079 P | 1.122  | 5.75  | 0.04556 | 1709  |
| F2rl2         | A_51_P261164 | NM_010170    | coagulation factor II (thrombin) receptor-   | 1.252 |       | 0.59676 | 12708 A | -1.013 | 49.48 | 0.86853 | 11748 |
| Hgfac         | A_51_P101545 | NM_019447    | hepatocyte growth factor activator           | 1.252 | 49.93 | 0.49841 | 9595 P  | 1.023  | 38.4  | 0.74033 | 10690 |
| Mrpl13        | A_51_P428715 | NM_026759    | mitochondrial ribosomal protein L13          | 1.252 | 35.45 | 0.38302 | 5989 P  | 1.04   | 33.49 | 0.59745 | 9427  |
| Spg21         | A_52_P219966 | NM_138584    | spastic paraplegia 21 homolog (human)        | 1.252 | 35.45 | 0.38011 | 5928 P  | 1.208  | 3.01  | 0.03553 | 1376  |
| Tnfrsf12a     | A_51_P131408 | NM_013749    | tumor necrosis factor receptor superfam      | 1.252 | 69.29 | 0.70335 | 18585 P | -1.234 | 1.1   | 0.02229 | 941   |
| AA536717      | A_52_P242445 | NM_001024512 | expressed sequence AA536717                  | 1.251 | 42.28 | 0.41801 | 6963 P  | 1.1    | 16.2  | 0.30973 | 6440  |
| Akr1b3        | A_52_P346706 | NM_009658    | aldo-keto reductase family 1, member B3      | 1.251 | 61.79 | 0.62845 | 14928 P | 1.046  | 25.31 | 0.32695 | 6640  |
| Eef1g         | A_51_P401471 | AK011951     | eukaryotic translation elongation factor 1   | 1.251 | 65.79 | 0.67257 | 17199 P | -1.013 | 49.48 | 0.79325 | 11123 |
| Hspa12b       | A_51_P130332 | NM_028306    | heat shock protein 12B                       | 1.251 | 53.87 | 0.52683 | 10590 P | -1.023 | 48.39 | 0.6878  | 10217 |
| Psmc6         | A_51_P509941 | BC043044     | proteasome (prosome, macropain) 26S su       | 1.251 | 31.88 | 0.3571  | 5289 P  | 1.077  | 16.2  | 0.26904 | 5935  |
| Rasgrp3       | A_52_P198435 | NM_207246    | RAS, guanyl releasing protein 3              | 1.251 | 53.87 | 0.54024 | 11038 P | 1.118  | 6.98  | 0.05634 | 2038  |
| Ube2l6        | A_52_P214740 | NM_019949    | ubiquitin-conjugating enzyme E2L 6           | 1.251 | 45.92 | 0.466   | 8413 P  | 1.002  | 42.43 | 0.97353 | 12771 |
| 3300001M20Rik | A_52_P525837 | NM_175113    | RIKEN cDNA 3300001M20 gene                   | 1.25  | 31.88 | 0.36381 | 5473 P  | -1.008 | 49.48 | 0.85207 | 11615 |
| Cd2ap         | A_51_P229076 | NM_009847    | CD2-associated protein                       | 1.25  | 53.87 | 0.50783 | 9898 P  | 1.129  | 13.58 | 0.28196 | 6116  |
| Dap           | A_52_P576442 | NM_146057    | death-associated protein                     | 1.25  | 49.93 | 0.57665 | 9920 M  | 1.197  | 6.98  | 0.14384 | 3919  |
| Ndufs6        | A_52_P685828 | NM_010888    | NADH dehydrogenase (ubiquinone) Fe-S p       | 1.25  | 42.28 | 0.4196  | 7013 P  | -1.063 | 33.49 | 0.24609 | 5590  |
| Nos3          | A_51_P139651 | NM_008713    | nitric oxide synthase 3, endothelial cell    | 1.25  | 53.87 | 0.51279 | 10058 P | 1.073  | 30.75 | 0.67432 | 10090 |

|               |              |                    |                                              |       |       |         |         |        |       |         |       |
|---------------|--------------|--------------------|----------------------------------------------|-------|-------|---------|---------|--------|-------|---------|-------|
| Pet112l       | A_51_P397375 | NM_144896          | PET112-like (yeast)                          | 1.25  | 57.76 | 0.57961 | 12458 P | -1.148 | 5.75  | 0.10386 | 3185  |
| Smpd1         | A_51_P429209 | NM_011421          | sphingomyelin phosphodiesterase 1, acid      | 1.25  | 61.79 | 0.64119 | 15736 P | -1.016 | 49.48 | 0.83037 | 11457 |
| Abca5         | A_51_P284646 | NM_147219          | ATP-binding cassette, sub-family A (ABC1)    | 1.249 | 53.87 | 0.5295  | 10718 P | 1.1    | 9.71  | 0.1171  | 3421  |
| Bre           | A_51_P197365 | NM_181279          | brain and reproductive organ-expressed p     | 1.249 | 23.47 | 0.33533 | 4782 P  | -1.141 | 8.32  | 0.12284 | 3559  |
| Efemp2        | A_51_P160544 | NM_021474          | epidermal growth factor-containing fibuli    | 1.249 | 45.92 | 0.46442 | 8365 P  | 1.006  | 42.43 | 0.90449 | 12141 |
| Garnl1        | A_52_P39372  | BC010340           | GTPase activating RANGAP domain-like 1       | 1.249 | 72.2  | 0.74659 | 20913 P | 1.031  | 33.49 | 0.55467 | 9058  |
| Gcat          | A_51_P159402 | NM_013847          | glycine C-acetyltransferase (2-amino-3-ke    | 1.249 | 57.76 | 0.57174 | 12109 P | -1.036 | 46.3  | 0.60908 | 9514  |
| Rab20         | A_51_P417854 | NM_011227          | RAB20, member RAS oncogene family            | 1.249 | 61.79 | 0.63533 | 15490 P | 1.027  | 33.49 | 0.56634 | 9174  |
| Skp1a         | A_52_P10458  | NM_011543          | S-phase kinase-associated protein 1A         | 1.249 | 45.92 | 0.45115 | 7945 P  | 1.168  | 3.01  | 0.01925 | 805   |
| 2310008H04Rik | A_51_P428226 | NM_146068          | RIKEN cDNA 2310008H04 gene                   | 1.248 | 35.45 | 0.39187 | 6214 P  | 1.157  | 6.98  | 0.12116 | 3524  |
| 2810423E13Rik | A_52_P623352 | AK084485           | major facilitator superfamily domain cont    | 1.248 | 31.88 | 0.37009 | 5623 P  | -1.01  | 49.48 | 0.88251 | 11886 |
| Pax7          | A_51_P295131 | NM_011039          | paired box gene 7                            | 1.248 | 69.29 | 0.64119 | 14711 M | 1.029  | 33.49 | 0.50787 | 8659  |
| Hba-a1        | A_52_P208681 | M10466             | hemoglobin alpha, adult chain 2              | 1.247 | 75.14 | 0.82282 | 25603 P | 1.235  | 8.32  | 0.25768 | 5776  |
| Plrg1         | A_51_P436796 | NM_016784          | pleiotropic regulator 1, PRL1 homolog (Ar    | 1.247 | 53.87 | 0.50433 | 9847 P  | -1.223 | 0.75  | 0.01384 | 584   |
| Rpl4          | A_52_P376829 | NM_024212          | ribosomal protein L4                         | 1.247 | 57.76 | 0.6416  | 11936 M | 1.061  | 19.02 | 0.2199  | 5205  |
| Wwp2          | A_51_P386358 | NM_025830          | WW domain containing E3 ubiquitin prot       | 1.247 | 49.93 | 0.47485 | 8793 P  | 1.098  | 9.71  | 0.10429 | 3191  |
| Herc3         | A_51_P249313 | NM_028705          | hect domain and RLD 3                        | 1.246 | 35.45 | 0.43852 | 7316 P  | 1.178  | 6.98  | 0.11364 | 3348  |
| Lmo6          | A_52_P1048   | AK079845           | LIM domain only 6                            | 1.246 | 82.34 | 0.82596 | 22309 M | -1.286 | 0.56  | 0.01529 | 651   |
| Timp1         | A_51_P512384 | NM_001044384       | tissue inhibitor of metalloproteinase 1      | 1.246 | 53.87 | 0.5101  | 9943 P  | -1.056 | 33.49 | 0.21868 | 5183  |
| Unc5a         | A_52_P541095 | NM_153131          | unc-5 homolog A (C. elegans)                 | 1.246 | 72.2  | 0.76922 | 22164 P | -1.035 | 44.4  | 0.46108 | 8119  |
| 2410012H22Rik | A_51_P236829 | ENSMUST00000072916 | RIKEN cDNA 2410012H22 gene                   | 1.245 | 53.87 | 0.5306  | 10758 P | 1.132  | 5.75  | 0.04205 | 1584  |
| Akt2          | A_51_P408044 | NM_007434          | thymoma viral proto-oncogene 2               | 1.245 | 57.76 | 0.56738 | 11957 P | 1.066  | 19.02 | 0.28968 | 6206  |
| D330001F17Rik | A_51_P249385 | AK090131           | RIKEN cDNA D330001F17 gene                   | 1.245 | 61.79 | 0.62723 | 14803 P | 1.059  | 19.02 | 0.26009 | 5809  |
| D5Ertd593e    | A_52_P645855 | NM_175096          | DNA segment, Chr 5, ERATO Doi 593, exp       | 1.245 | 69.29 | 0.70545 | 18694 P | 1.061  | 19.02 | 0.2226  | 5249  |
| Ybx2          | A_51_P455488 | NM_016875          | Y box protein 2                              | 1.245 | 61.79 | 0.60052 | 13481 P | -1.123 | 19.02 | 0.24053 | 5498  |
| Zdhhc17       | A_51_P348672 | NM_172554          | zinc finger, DHHC domain containing 17       | 1.245 | 57.76 | 0.55103 | 11469 P | 1.094  | 13.58 | 0.18728 | 4687  |
| Zfp291        | A_51_P393161 | AK173175           | zinc finger protein 291                      | 1.245 | 45.92 | 0.46016 | 8219 P  | 1.078  | 19.02 | 0.29192 | 6230  |
| Cutl1         | A_52_P442676 | NM_198602          | cut-like 1 (Drosophila)                      | 1.244 | 69.29 | 0.71449 | 19198 P | 1.103  | 11.33 | 0.19192 | 4764  |
| Igbp1         | A_51_P222092 | NM_008784          | immunoglobulin (CD79A) binding protein       | 1.244 | 69.29 | 0.72827 | 20129 P | 1.137  | 9.71  | 0.18147 | 4600  |
| Raf1          | A_52_P412600 | NM_029780          | v-raf-leukemia viral oncogene 1              | 1.244 | 49.93 | 0.48895 | 9204 P  | 1.149  | 4.63  | 0.0421  | 1588  |
| AA986860      | A_51_P340829 | NM_177604          | expressed sequence AA986860                  | 1.243 | 75.14 | 0.80691 | 24510 P | -1.146 | 2.53  | 0.03502 | 1343  |
| AU040320      | A_51_P351351 | AK053479           | expressed sequence AU040320                  | 1.243 | 38.68 | 0.4     | 6522 P  | -1.067 | 28.13 | 0.18589 | 4666  |
| Fasn          | A_51_P321126 | NM_007988          | fatty acid synthase                          | 1.243 | 69.29 | 0.70381 | 18608 P | -1.031 | 46.3  | 0.59891 | 9440  |
| Galnt11       | A_52_P129706 | AK079811           | UDP-N-acetyl-alpha-D-galactosamine:pol       | 1.243 | 69.29 | 0.72951 | 20197 P | 1.02   | 38.4  | 0.72016 | 10498 |
| Trap1         | A_51_P402435 | NM_026508          | TNF receptor-associated protein 1            | 1.243 | 57.76 | 0.58539 | 12799 P | 1      | 49.48 | 0.99613 | 13017 |
| Centd3        | A_52_P195018 | NM_139206          | centaurin, delta 3                           | 1.242 | 49.93 | 0.49059 | 9244 P  | -1.041 | 43.75 | 0.42186 | 7748  |
| Gsk3b         | A_52_P641629 | NM_019827          | glycogen synthase kinase 3 beta              | 1.242 | 45.92 | 0.44589 | 7828 P  | 1.148  | 5.75  | 0.06335 | 2242  |
| Hmgb3         | A_51_P138548 | NM_008253          | high mobility group box 3                    | 1.242 | 49.93 | 0.47599 | 8826 P  | 1.421  | 0.24  | 0.00584 | 63    |
| Kif2a         | A_52_P150327 | NM_008442          | kinesin family member 2A                     | 1.242 | 38.68 | 0.39615 | 6407 M  | -1.024 | 47.43 | 0.61032 | 9530  |
| Plekha1       | A_52_P215469 | NM_133942          | pleckstrin homology domain containing, f     | 1.242 | 38.68 | 0.40388 | 6581 P  | 1.215  | 2.53  | 0.02518 | 1037  |
| Rnf4          | A_52_P349540 | AK037465           | ring finger protein 4                        | 1.242 | 53.87 | 0.51294 | 10063 P | 1.198  | 5.75  | 0.12614 | 3635  |
| 1300018J18Rik | A_51_P340947 | NM_027905          | RIKEN cDNA 1300018J18 gene                   | 1.241 | 69.29 | 0.73204 | 20349 P | 1.091  | 9.71  | 0.09879 | 3084  |
| Brd8          | A_52_P676492 | NM_030147          | bromodomain containing 8                     | 1.241 | 75.14 | 0.79356 | 23718 P | 1.056  | 28.13 | 0.54935 | 9016  |
| Chchd5        | A_52_P324694 | NM_025395          | coiled-coil-helix-coiled-coil-helix domain c | 1.241 | 25.79 | 0.35096 | 5133 P  | -1.016 | 49.48 | 0.79225 | 11118 |
| Fasl          | A_52_P77106  | NM_010177          | Fas ligand (TNF superfamily, member 6)       | 1.241 | 65.79 | 0.58218 | 9801 A  | -1.13  | 4.63  | 0.05863 | 2095  |
| Mrpl47        | A_52_P595537 | BC029173           | mitochondrial ribosomal protein L47          | 1.241 | 65.79 | 0.68647 | 17762 P | 1.008  | 42.43 | 0.88251 | 11890 |
| Nipbl         | A_51_P299681 | AK016861           | Nipped-B homolog (Drosophila)                | 1.241 | 69.29 | 0.69938 | 18348 P | 1.149  | 9.71  | 0.22821 | 5333  |
| Snap23        | A_52_P155778 | NM_009222          | synaptosomal-associated protein 23           | 1.241 | 38.68 | 0.40316 | 6566 P  | 1.17   | 8.32  | 0.14813 | 4010  |
| Ttc8          | A_51_P507899 | NM_029553          | tetratricopeptide repeat domain 8            | 1.241 | 35.45 | 0.39278 | 6237 P  | 1.282  | 1.58  | 0.01786 | 763   |
| Vps41         | A_51_P412338 | NM_172120          | vacuolar protein sorting 41 (yeast)          | 1.241 | 38.68 | 0.41235 | 6835 P  | 1.05   | 22.1  | 0.27425 | 6018  |
| 2410016O06Rik | A_51_P350395 | AK078791           | RIKEN cDNA 2410016O06 gene                   | 1.24  | 69.29 | 0.71259 | 15658 M | 1.085  | 13.58 | 0.16984 | 4380  |
| Cdc40         | A_52_P657240 | AK004569           | cell division cycle 40 homolog (yeast)       | 1.24  | 45.92 | 0.4683  | 8474 P  | 1.042  | 33.49 | 0.70554 | 10366 |
| D5Wsu178e     | A_52_P630563 | NM_027652          | DNA segment, Chr 5, Wayne State Univer       | 1.24  | 61.79 | 0.60754 | 13791 P | -1.069 | 25.31 | 0.15676 | 4161  |

|               |              |              |                                                 |       |       |         |         |        |       |         |       |
|---------------|--------------|--------------|-------------------------------------------------|-------|-------|---------|---------|--------|-------|---------|-------|
| Elac2         | A_52_P649236 | BC023134     | elaC homolog 2 (E. coli)                        | 1.24  | 49.93 | 0.49861 | 9623 P  | 1.038  | 30.75 | 0.53147 | 8854  |
| Fkbp7         | A_51_P415607 | NM_010222    | FK506 binding protein 7                         | 1.24  | 45.92 | 0.44386 | 7770 P  | -1.042 | 46.85 | 0.71595 | 10450 |
| Kng1          | A_52_P151983 | NM_023125    | kininogen 1                                     | 1.24  |       | 0.7596  | 11964 A | 1.094  | 19.02 | 0.46769 | 8185  |
| Myo1b         | A_52_P355934 | NM_010863    | myosin IB                                       | 1.24  | 42.28 | 0.43241 | 7432 P  | 1.177  | 4.63  | 0.053   | 1953  |
| Pard3         | A_52_P633612 | NM_001013580 | par-3 (partitioning defective 3) homolog        | 1.24  | 65.79 | 0.665   | 16811 P | 1.029  | 36.07 | 0.61452 | 9569  |
| Pipox         | A_51_P337195 | NM_008952    | pipecolic acid oxidase                          | 1.24  | 75.14 | 0.81625 | 25168 P | 1.04   | 28.13 | 0.42866 | 7811  |
| Plg           | A_52_P662013 | NM_008877    | plasminogen                                     | 1.24  |       | 0.66137 | 13199 A | 1.132  | 5.75  | 0.04735 | 1769  |
| Tcf1          | A_51_P302626 | NM_009327    | transcription factor 1                          | 1.24  | 65.79 | 0.66929 | 16995 P | 1.005  | 42.43 | 0.94108 | 12489 |
| Tsn           | A_52_P415351 | NM_011650    | translin                                        | 1.24  | 28.61 | 0.35837 | 5380 P  | 1.193  | 3.82  | 0.04712 | 1764  |
| 5730403B10Rik | A_52_P683178 | NM_025670    | RIKEN cDNA 5730403B10 gene                      | 1.239 | 53.87 | 0.52412 | 10484 P | 1.06   | 22.1  | 0.36525 | 7097  |
| 3110001D03Rik | A_51_P212183 | NM_025849    | RIKEN cDNA 3110001D03 gene                      | 1.238 | 28.61 | 0.36593 | 5515 P  | -1.012 | 49.48 | 0.86373 | 11716 |
| Cyfp1         | A_51_P403005 | NM_011370    | cytoplasmic FMR1 interacting protein 1          | 1.238 | 31.88 | 0.3765  | 5802 P  | 1.118  | 9.71  | 0.15833 | 4190  |
| Nlgn1         | A_52_P497105 | AK083116     | neuroligin 1                                    | 1.238 | 69.29 | 0.60907 | 13178 M | 1.1    | 9.71  | 0.10562 | 3205  |
| Rab13         | A_51_P387473 | NM_026677    | RAB13, member RAS oncogene family               | 1.238 | 61.79 | 0.59364 | 13136 P | 1.067  | 19.02 | 0.29693 | 6290  |
| Trp53inp1     | A_52_P503387 | NM_021897    | transformation related protein 53 inducible     | 1.238 | 57.76 | 0.57665 | 12331 P | -1.146 | 5.75  | 0.08637 | 2812  |
| 2010003O02Rik | A_51_P119588 | AK008077     | RIKEN cDNA 2010003O02 gene                      | 1.237 | 35.45 | 0.44053 | 7048 P  | -1.023 | 47.43 | 0.60143 | 9466  |
| Dusp3         | A_51_P461748 | NM_028207    | dual specificity phosphatase 3 (vaccinia virus) | 1.237 | 65.79 | 0.68577 | 17717 P | -1.112 | 8.32  | 0.07865 | 2617  |
| Lxn           | A_51_P487813 | NM_016753    | latexin                                         | 1.237 | 65.79 | 0.6531  | 16265 P | 1.102  | 9.71  | 0.08446 | 2766  |
| Tbca          | A_51_P489966 | NM_009321    | tubulin cofactor a                              | 1.237 | 38.68 | 0.54007 | 8947 M  | 1.076  | 25.31 | 0.54469 | 8981  |
| Usp33         | A_52_P234004 | AK047530     | ubiquitin specific peptidase 33                 | 1.237 | 61.79 | 0.61718 | 14263 P | -1.035 | 43.75 | 0.4127  | 7650  |
| Hsd17b7       | A_52_P566605 | NM_010476    | hydroxysteroid (17-beta) dehydrogenase          | 1.236 | 35.45 | 0.38285 | 5971 P  | -1.105 | 13.58 | 0.14548 | 3954  |
| Rpl37         | A_52_P150675 | NM_026069    | ribosomal protein L37                           | 1.236 | 42.28 | 0.54946 | 9217 M  | 1.054  | 30.75 | 0.59387 | 9374  |
| Arhgap5       | A_52_P617762 | AK039081     | Rho GTPase activating protein 5                 | 1.235 | 53.87 | 0.53228 | 10795 P | 1.049  | 33.49 | 0.70373 | 10346 |
| Gtpbp1        | A_51_P256510 | NM_013818    | GTP binding protein 1                           | 1.235 | 49.93 | 0.47599 | 8458 M  | -1.013 | 49.48 | 0.85811 | 11661 |
| Pdcd5         | A_51_P178435 | NM_019746    | programmed cell death 5                         | 1.235 | 53.87 | 0.53849 | 11010 P | -1.039 | 45.68 | 0.62761 | 9693  |
| Smoc1         | A_51_P443403 | NM_022316    | SPARC related modular calcium binding 1         | 1.235 | 38.68 | 0.39887 | 6483 P  | -1.062 | 28.13 | 0.17475 | 4469  |
| Usp30         | A_51_P161413 | AK162153     | ubiquitin specific peptidase 30                 | 1.235 | 72.2  | 0.74324 | 20749 P | 1.091  | 9.71  | 0.09238 | 2953  |
| Vdac3         | A_51_P137971 | NM_011696    | voltage-dependent anion channel 3               | 1.235 | 49.93 | 0.49955 | 9642 P  | 1.043  | 30.75 | 0.59497 | 9392  |
| Axl           | A_52_P311787 | NM_009465    | AXL receptor tyrosine kinase                    | 1.234 | 57.76 | 0.54815 | 11346 P | 1.04   | 33.49 | 0.64644 | 9856  |
| Maoa          | A_51_P125355 | NM_173740    | monoamine oxidase A                             | 1.234 | 61.79 | 0.60476 | 13672 P | -1.022 | 49    | 0.73205 | 10590 |
| Ndufa9        | A_51_P280492 | NM_025358    | NADH dehydrogenase (ubiquinone) 1 alpha         | 1.234 | 65.79 | 0.69989 | 13937 M | 1.17   | 8.32  | 0.20155 | 4930  |
| Pfn2          | A_52_P359061 | NM_019410    | profilin 2                                      | 1.234 | 42.28 | 0.42844 | 7305 P  | 1.126  | 11.33 | 0.24091 | 5505  |
| Rpl7a         | A_52_P548790 | NM_013721    | ribosomal protein L7a                           | 1.234 | 35.45 | 0.53469 | 8835 M  | 1.152  | 8.32  | 0.1687  | 4363  |
| Atp6v1h       | A_52_P112888 | NM_133826    | ATPase, H+ transporting, lysosomal V1 subunit   | 1.233 | 57.76 | 0.55296 | 11532 P | 1.087  | 16.2  | 0.28533 | 6149  |
| Lactb2        | A_51_P379373 | NM_145381    | lactamase, beta 2                               | 1.233 | 61.79 | 0.61718 | 14255 P | -1.139 | 4.63  | 0.07277 | 2468  |
| Sec61b        | A_52_P93886  | NM_024171    | Sec61 beta subunit                              | 1.233 | 53.87 | 0.61824 | 11220 M | 1.057  | 28.13 | 0.54173 | 8960  |
| Zbed3         | A_52_P27371  | AK138671     |                                                 | 1.233 | 82.34 | 0.87103 | 27353 M | -1.159 | 1.62  | 0.02609 | 1077  |
| AI314180      | A_52_P652459 | AK038775     | expressed sequence AI314180                     | 1.232 | 45.92 | 0.45706 | 8106 P  | -1.089 | 19.02 | 0.1534  | 4100  |
| Ctsh          | A_52_P51078  | NM_007801    | cathepsin H                                     | 1.232 | 57.76 | 0.58439 | 12741 P | 1.012  | 42.43 | 0.80555 | 11225 |
| Gja7          | A_52_P285041 | NM_008122    | gap junction membrane channel protein alpha     | 1.232 | 61.79 | 0.60436 | 13650 P | -1.005 | 49.48 | 0.95439 | 12621 |
| Gnb4          | A_52_P640474 | NM_013531    | guanine nucleotide binding protein, beta 4      | 1.232 | 57.76 | 0.56738 | 11950 P | 1.197  | 5.75  | 0.11684 | 3416  |
| Gpr124        | A_51_P282523 | NM_054044    | G protein-coupled receptor 124                  | 1.232 | 38.68 | 0.42003 | 7021 P  | 1.19   | 3.82  | 0.05071 | 1874  |
| Paics         | A_52_P449768 | NM_025939    | phosphoribosylaminoimidazole carboxylase        | 1.232 | 57.76 | 0.57969 | 12479 P | 1.053  | 22.1  | 0.3306  | 6679  |
| Phf8          | A_51_P117369 | NM_177201    | PHD finger protein 8                            | 1.232 |       | 0.72548 | 12598 A | 1.09   | 9.71  | 0.09269 | 2957  |
| Wdfy3         | A_52_P409778 | NM_172882    | WD repeat and FYVE domain containing 3          | 1.232 | 65.79 | 0.6531  | 16262 M | 1.064  | 22.1  | 0.35695 | 6979  |
| Zdhhc6        | A_51_P416439 | NM_001033573 | zinc finger, DHHC domain containing 6           | 1.232 | 57.76 | 0.5748  | 12232 P | 1.049  | 19.02 | 0.25261 | 5689  |
| Plcd1         | A_51_P239766 | NM_019676    | phospholipase C, delta 1                        | 1.231 | 57.76 | 0.58305 | 12699 P | 1.142  | 3.82  | 0.03066 | 1212  |
| Dctn2         | A_51_P435333 | NM_027151    | dynactin 2                                      | 1.23  | 35.45 | 0.39347 | 6263 P  | -1.108 | 9.71  | 0.09181 | 2940  |
| Gck           | A_51_P106294 | NM_010292    | glucokinase                                     | 1.23  | 53.87 | 0.52912 | 10702 P | 1.069  | 13.58 | 0.1475  | 3992  |
| Got1          | A_51_P370700 | NM_010324    | glutamate oxaloacetate transaminase 1, soluble  | 1.23  | 49.93 | 0.49479 | 9420 P  | 1.106  | 13.58 | 0.21473 | 5109  |
| Smarce1       | A_52_P37517  | AK017922     | SWI/SNF related, matrix associated, actin       | 1.23  | 72.2  | 0.7617  | 21721 P | 1.137  | 5.75  | 0.05066 | 1871  |
| 2410003P15Rik | A_52_P660765 | AK028574     | RIKEN cDNA 2410003P15 gene                      | 1.229 | 69.29 | 0.68819 | 16989 M | 1.086  | 13.58 | 0.14842 | 4019  |
| 5730472N09Rik | A_51_P146432 | NM_175392    | RIKEN cDNA 5730472N09 gene                      | 1.229 | 38.68 | 0.41157 | 6814 P  | -1.241 | 0.75  | 0.0148  | 632   |

|               |               |                    |                                              |       |       |         |         |        |       |         |       |
|---------------|---------------|--------------------|----------------------------------------------|-------|-------|---------|---------|--------|-------|---------|-------|
| Map2k7        | A_52_P70381   | AK028772           | mitogen activated protein kinase kinase 7    | 1.229 | 77.44 | 0.83461 | 26641 P | 1.117  | 11.33 | 0.17748 | 4521  |
| Rfxdc1        | A_51_P151848  | NM_177306          | regulatory factor X domain containing 1      | 1.229 | 49.93 | 0.48647 | 9128 P  | 1.101  | 16.2  | 0.33619 | 6744  |
| Adpgk         | A_51_P266143  | NM_028121          | ADP-dependent glucokinase                    | 1.228 | 45.92 | 0.45073 | 7926 P  | 1.262  | 2.04  | 0.02475 | 1025  |
| E030018N11Rik | A_52_P110541  | NM_001033380       | RIKEN cDNA E030018N11 gene                   | 1.228 | 42.28 | 0.42396 | 7161 P  | -1.079 | 22.1  | 0.15941 | 4207  |
| Rnf12         | A_52_P104761  | NM_011276          | ring finger protein 12                       | 1.228 | 57.76 | 0.54327 | 11122 P | 1.047  | 25.31 | 0.36912 | 7154  |
| Rpl23a        | A_51_P127516  | NM_207523          | ribosomal protein L23a                       | 1.228 | 38.68 | 0.5481  | 9168 M  | 1.031  | 33.49 | 0.55635 | 9077  |
| Tbx3          | A_52_P183368  | NM_011535          | T-box 3                                      | 1.228 | 69.29 | 0.69847 | 18302 P | -1.069 | 30.75 | 0.22666 | 5302  |
| Ube2n         | A_52_P387803  | NM_080560          | ubiquitin-conjugating enzyme E2N             | 1.228 | 49.93 | 0.4726  | 8693 P  | 1.197  | 2.53  | 0.02191 | 926   |
| Zfp143        | A_52_P496173  | NM_009281          | zinc finger protein 143                      | 1.228 | 72.2  | 0.7414  | 20666 P | 1.042  | 28.13 | 0.41816 | 7716  |
| D230040A04Rik | A_52_P545914  | AK039302           | RIKEN cDNA D230040A04 gene                   | 1.227 | 53.87 | 0.51941 | 10322 P | 1.061  | 25.31 | 0.47083 | 8206  |
| Dym           | A_52_P896     | AK080149           | dymeclin                                     | 1.227 |       | 0.894   | 12459 A | 1.019  | 38.4  | 0.71017 | 10401 |
| Lgals1        | A_51_P465281  | NM_008495          | lectin, galactose binding, soluble 1         | 1.227 | 69.29 | 0.73013 | 20278 P | 1.025  | 36.07 | 0.6241  | 9658  |
| 4631424J17Rik | A_52_P1124217 | AV338080           |                                              | 1.226 | 61.79 | 0.59903 | 13387 P | 1.187  | 5.75  | 0.09023 | 2900  |
| Btg2          | A_52_P35217   | NM_007570          | B-cell translocation gene 2, anti-proliferat | 1.226 | 72.2  | 0.7477  | 20968 P | -1.065 | 36.07 | 0.3392  | 6767  |
| Epb4.1l2      | A_52_P335201  | NM_013511          | erythrocyte protein band 4.1-like 2          | 1.226 | 49.93 | 0.47364 | 8748 P  | 1.123  | 11.33 | 0.22103 | 5219  |
| Rpl13         | A_52_P668076  | NM_016738          | ribosomal protein L13                        | 1.226 | 69.29 | 0.75846 | 16404 M | -1.072 | 33.49 | 0.32064 | 6573  |
| Rps16         | A_51_P416995  | NM_013647          | ribosomal protein S16                        | 1.226 | 45.92 | 0.58248 | 10138 M | 1.046  | 25.31 | 0.3853  | 7342  |
| Ube2v2        | A_52_P118390  | NM_023585          | ubiquitin-conjugating enzyme E2 variant 2    | 1.226 | 35.45 | 0.39529 | 6383 P  | 1.013  | 42.43 | 0.80001 | 11176 |
| 2610029G23Rik | A_52_P272936  | NM_026312          | RIKEN cDNA 2610029G23 gene                   | 1.225 | 72.2  | 0.76648 | 22009 P | 1.017  | 42.43 | 0.82868 | 11441 |
| Chchd7        | A_52_P788229  | AK145105           | coiled-coil-helix-coiled-coil-helix domain c | 1.225 | 35.45 | 0.40584 | 6631 P  | -1.05  | 42.43 | 0.37996 | 7275  |
| Csad          | A_51_P268529  | ENSMUST00000023805 | cysteine sulfinic acid decarboxylase         | 1.225 | 53.87 | 0.50712 | 9889 P  | -1.003 | 49.48 | 0.95533 | 12625 |
| Dscr1         | A_52_P617327  | NM_019466          | Down syndrome critical region homolog 1      | 1.225 | 61.79 | 0.59581 | 13278 P | 1.001  | 42.43 | 0.98495 | 12932 |
| Myst2         | A_51_P202699  | AK078483           | MYST histone acetyltransferase 2             | 1.225 | 83.36 | 0.90191 | 29187 M | -1.104 | 11.33 | 0.10402 | 3186  |
| Pleckhb2      | A_51_P356705  | NM_145516          | pleckstrin homology domain containing, f     | 1.225 | 49.93 | 0.47555 | 8811 P  | -1.086 | 25.31 | 0.24091 | 5504  |
| Rb1cc1        | A_51_P332100  | NM_009826          | RB1-inducible coiled-coil 1                  | 1.225 | 57.76 | 0.568   | 11982 P | 1.001  | 42.43 | 0.97618 | 12808 |
| Rpl10a        | A_52_P407086  | NM_011287          | ribosomal protein L10A                       | 1.225 | 49.93 | 0.59565 | 10587 M | 1.15   | 9.71  | 0.21179 | 5068  |
| Trrap         | A_52_P304469  | AK147241           | transformation/transcription domain-ass      | 1.225 | 49.93 | 0.47627 | 8842 P  | -1.344 | 0.51  | 0.00627 | 158   |
| 1810035L17Rik | A_51_P367040  | NM_026958          | RIKEN cDNA 1810035L17 gene                   | 1.224 | 31.88 | 0.3921  | 6222 P  | 1.046  | 30.75 | 0.61752 | 9607  |
| 9130227C08Rik | A_52_P124320  | AK122247           | RIKEN cDNA 9130227C08Rik gene                | 1.224 | 49.93 | 0.49899 | 9626 P  | -1.082 | 22.1  | 0.17785 | 4531  |
| C530043G21Rik | A_52_P388001  | AK034081           | RIKEN cDNA C530043G21 gene                   | 1.224 | 69.29 | 0.72253 | 19816 P | 1.085  | 13.58 | 0.15824 | 4185  |
| Capzb         | A_52_P428784  | AK007209           | capping protein (actin filament) muscle Z    | 1.224 |       | 0.70802 | 15859 A | -1.1   | 11.33 | 0.08963 | 2884  |
| Serpina11     | A_52_P423296  | NM_199314          | serine (or cysteine) peptidase inhibitor, cl | 1.224 |       | 0.47476 | 8037 A  | 1.028  | 33.49 | 0.54705 | 8997  |
| Sestd1        | A_52_P408237  | AK044401           | SEC14 and spectrin domains 1                 | 1.224 | 31.88 | 0.3921  | 6220 P  | 1.167  | 6.98  | 0.12962 | 3682  |
| Smo           | A_51_P258766  | NM_176996          | smoothened homolog (Drosophila)              | 1.224 | 28.61 | 0.37646 | 5796 P  | 1.131  | 5.75  | 0.05026 | 1859  |
| Stard3nl      | A_51_P172688  | NM_024270          | STARD3 N-terminal like                       | 1.224 | 45.92 | 0.47093 | 8599 P  | -1.16  | 1.62  | 0.02735 | 1111  |
| Vcl           | A_52_P190973  | NM_009502          | vinculin                                     | 1.224 | 42.28 | 0.42411 | 7182 P  | 1.185  | 3.82  | 0.05166 | 1900  |
| Vti1b         | A_51_P438692  | NM_016800          | vesicle transport through interaction with   | 1.224 | 31.88 | 0.46319 | 7659 P  | 1.042  | 30.75 | 0.51573 | 8725  |
| Arhgef2       | A_51_P502701  | NM_008487          | rho/rac guanine nucleotide exchange fact     | 1.223 | 53.87 | 0.52419 | 10500 P | 1.151  | 6.98  | 0.10199 | 3155  |
| Nap1l1        | A_51_P506787  | NM_015781          | nucleosome assembly protein 1-like 1         | 1.223 | 45.92 | 0.58125 | 10096 M | 1.295  | 3.01  | 0.07233 | 2447  |
| Rps27a        | A_51_P128945  | NM_001033865       | ribosomal protein S27a                       | 1.223 | 72.2  | 0.76568 | 16687 M | -1.052 | 38.4  | 0.27522 | 6029  |
| Serpinc9b     | A_51_P406780  | NM_011452          | serine (or cysteine) peptidase inhibitor, cl | 1.223 | 75.14 | 0.80444 | 24393 M | -1.096 | 16.2  | 0.13742 | 3795  |
| Sgk           | A_51_P118237  | NM_011361          | serum/glucocorticoid regulated kinase        | 1.223 | 38.68 | 0.55089 | 9253 M  | 1.03   | 38.4  | 0.80093 | 11187 |
| Smarcad1      | A_52_P45551   | NM_007958          | SWI/SNF-related, matrix-associated actin     | 1.223 | 53.87 | 0.53807 | 10993 P | 1.132  | 9.71  | 0.14826 | 4011  |
| 1700081L11Rik | A_51_P281164  | XM_001000446       | RIKEN cDNA 1700081L11 gene                   | 1.222 |       | 0.89757 | 12559 A | -1.084 | 19.02 | 0.12598 | 3627  |
| 1810020G14Rik | A_52_P70027   | BC100533           | RIKEN cDNA 1810020G14 gene                   | 1.222 | 53.87 | 0.51548 | 10145 P | -1.087 | 38.4  | 0.50017 | 8581  |
| Frg1          | A_51_P267544  | NM_013522          | FSHD region gene 1                           | 1.222 | 38.68 | 0.42405 | 7167 P  | 1.046  | 30.75 | 0.54284 | 8968  |
| Nhp2l1        | A_52_P2081    | U95114             | NHP2 non-histone chromosome protein 2        | 1.222 | 42.28 | 0.43972 | 7630 P  | 1.075  | 25.31 | 0.49069 | 8447  |
| Zfp608        | A_52_P598224  | NM_175751          | zinc finger protein 608                      | 1.222 | 61.79 | 0.62968 | 15043 P | 1.165  | 11.33 | 0.34462 | 6818  |
| Mtf2          | A_51_P264995  | S78454             | metal response element binding transcrip     | 1.221 | 49.93 | 0.5012  | 9685 P  | 1.07   | 16.2  | 0.17078 | 4396  |
| Nufip1        | A_52_P643784  | NM_013745          | nuclear fragile X mental retardation prote   | 1.221 | 57.76 | 0.54188 | 11082 P | 1.011  | 42.43 | 0.91857 | 12252 |
| 8430427H17Rik | A_51_P475853  | AK029844           | RIKEN cDNA 8430427H17 gene                   | 1.22  |       | 0.89849 | 12590 A | -1.146 | 2.53  | 0.03104 | 1228  |
| Armc6         | A_52_P287328  | NM_133972          | armadillo repeat containing 6                | 1.22  | 38.68 | 0.58532 | 10588 M | 1.106  | 8.32  | 0.05919 | 2117  |
| Bapx1         | A_52_P90603   | U87957             | bagpipe homeobox gene 1 homolog (Dro         | 1.22  |       | 0.78351 | 12635 A | -1.082 | 19.02 | 0.14341 | 3911  |



|               |              |              |                                             |       |       |         |         |        |       |         |       |
|---------------|--------------|--------------|---------------------------------------------|-------|-------|---------|---------|--------|-------|---------|-------|
| Dhrs1         | A_51_P293901 | NM_026819    | dehydrogenase/reductase (SDR family) m      | 1.22  | 57.76 | 0.56182 | 11792 P | 1.004  | 42.43 | 0.93901 | 12469 |
| Nrf1          | A_52_P376269 | NM_010938    | nuclear respiratory factor 1                | 1.22  | 61.79 | 0.60503 | 13687 P | 1.015  | 40.63 | 0.76406 | 10886 |
| Pdk1          | A_52_P277654 | AK165090     | pyruvate dehydrogenase kinase, isoenzym     | 1.22  | 38.68 | 0.41119 | 6787 P  | 1.107  | 13.58 | 0.30561 | 6388  |
| Psmb5         | A_51_P269728 | NM_011186    | proteasome (prosome, macropain) subun       | 1.22  | 61.79 | 0.62738 | 14826 P | -1.072 | 33.49 | 0.27258 | 5991  |
| Top1          | A_52_P218132 | AK083930     | topoisomerase (DNA) I                       | 1.22  | 61.79 | 0.58491 | 12771 P | 1.169  | 4.63  | 0.0481  | 1799  |
| Bhlhb3        | A_51_P451176 | NM_024469    | basic helix-loop-helix domain containing,   | 1.219 | 57.76 | 0.55993 | 11750 P | -1.017 | 49.48 | 0.82519 | 11418 |
| Hoxa4         | A_52_P443588 | NM_008265    | homeo box A4                                | 1.219 | 61.79 | 0.63332 | 15382 P | 1.005  | 42.43 | 0.93769 | 12451 |
| Htatip2       | A_51_P228883 | NM_016865    | HIV-1 tat interactive protein 2, homolog (  | 1.219 | 75.14 | 0.80564 | 24451 P | -1.149 | 3.01  | 0.03953 | 1503  |
| Mmp11         | A_51_P293087 | NM_008606    | matrix metalloproteinase 11                 | 1.219 | 61.79 | 0.59991 | 13433 P | 1.034  | 30.75 | 0.43044 | 7830  |
| Mrrf          | A_52_P169295 | NM_026422    | mitochondrial ribosome recycling factor     | 1.219 | 57.76 | 0.57439 | 12212 P | -1.026 | 48.39 | 0.73259 | 10607 |
| Wee1          | A_52_P160078 | NM_009516    | wee 1 homolog (S. pombe)                    | 1.219 | 57.76 | 0.57861 | 12422 P | -1.043 | 43.75 | 0.46898 | 8192  |
| Atp6v1e1      | A_52_P303388 | NM_007510    | VATPase, H+ transporting, lysosomal V1 s    | 1.218 | 61.79 | 0.62828 | 14903 P | -1.006 | 49.48 | 0.96587 | 12710 |
| Limk2         | A_52_P393755 | NM_010718    | LIM motif-containing protein kinase 2       | 1.218 | 61.79 | 0.62092 | 14508 P | -1.04  | 45.05 | 0.53169 | 8861  |
| Pkd2l2        | A_52_P210909 | NM_016927    | polycystic kidney disease 2-like 2          | 1.218 | 65.79 | 0.65262 | 16233 P | 1.113  | 6.98  | 0.05512 | 2013  |
| Rps3a         | A_51_P292357 | NM_016959    | ribosomal protein S3a                       | 1.218 | 45.92 | 0.58491 | 10235 M | -1.295 | 0.51  | 0.0122  | 490   |
| Asna1         | A_51_P469531 | NM_019652    | arsA (bacterial) arsenite transporter, ATP- | 1.217 | 75.14 | 0.79241 | 23626 P | -1.041 | 43.15 | 0.36929 | 7158  |
| Cct2          | A_52_P369232 | NM_007636    | chaperonin subunit 2 (beta)                 | 1.217 | 65.79 | 0.67305 | 17219 P | 1.16   | 3.82  | 0.03601 | 1391  |
| Mrps5         | A_52_P333241 | AK047438     | mitochondrial ribosomal protein S5          | 1.217 | 49.93 | 0.48762 | 9172 P  | -1.071 | 22.1  | 0.14194 | 3887  |
| Stx8          | A_51_P356308 | NM_018768    | syntaxin 8                                  | 1.217 | 38.68 | 0.42029 | 7028 P  | 1.096  | 13.58 | 0.1811  | 4595  |
| Ubr1          | A_52_P636629 | AK037771     | ubiquitin protein ligase E3 component n-r   | 1.217 | 61.79 | 0.59447 | 13220 P | 1.205  | 2.04  | 0.01427 | 600   |
| Cwf19l1       | A_51_P212679 | XM_901651    | CWF19-like 1, cell cycle control (S. pombe  | 1.216 | 65.79 | 0.64906 | 16057 P | 1.022  | 38.4  | 0.71364 | 10435 |
| Ddx1          | A_52_P424563 | NM_134040    | DEAD (Asp-Glu-Ala-Asp) box polypeptide      | 1.216 | 45.92 | 0.45467 | 8048 P  | 1.161  | 9.71  | 0.24061 | 5500  |
| Entpd5        | A_51_P480046 | NM_001026214 | ectonucleoside triphosphate diphosphoh      | 1.216 | 75.14 | 0.79529 | 23840 P | 1.128  | 8.32  | 0.09648 | 3025  |
| Gpd2          | A_52_P373938 | AK079336     | glycerol phosphate dehydrogenase 2, mit     | 1.216 | 57.76 | 0.55666 | 11636 P | -1.089 | 13.58 | 0.10916 | 3245  |
| Mrps22        | A_51_P362903 | NM_025485    | mitochondrial ribosomal protein S22         | 1.216 | 45.92 | 0.45072 | 7924 P  | -1.045 | 44.4  | 0.55068 | 9034  |
| Pcnx          | A_52_P102223 | NM_018814    | pecanex homolog (Drosophila)                | 1.216 | 53.87 | 0.52825 | 10667 P | 1.149  | 3.82  | 0.03137 | 1236  |
| Rab1          | A_52_P631081 | NM_008996    | RAB1, member RAS oncogene family            | 1.216 | 53.87 | 0.71858 | 16221 M | 1.238  | 3.82  | 0.07219 | 2443  |
| Slc25a4       | A_51_P108334 | NM_007450    | solute carrier family 25 (mitochondrial ca  | 1.216 | 45.92 | 0.51785 | 8908 M  | -1.034 | 46.85 | 0.6775  | 10111 |
| 5730427N09Rik | A_51_P284166 | NM_021552    | RIKEN cDNA 5730427N09 gene                  | 1.215 | 31.88 | 0.39458 | 6352 P  | 1.017  | 40.63 | 0.71611 | 10459 |
| Alb1          | A_51_P160713 | NM_009654    | albumin 1                                   | 1.215 | 65.79 | 0.65402 | 16307 P | -1.303 | 0.51  | 0.00645 | 179   |
| Cnot6l        | A_52_P436464 | NM_144910    | CCR4-NOT transcription complex, subunit     | 1.215 | 57.76 | 0.58305 | 12689 P | 1.046  | 30.75 | 0.59474 | 9385  |
| Fuca2         | A_52_P441949 | NM_025799    | fucosidase, alpha-L- 2, plasma              | 1.215 | 75.14 | 0.78251 | 22904 P | -1.474 | 0     | 0.00584 | 18    |
| Gpc6          | A_52_P224829 | NM_001079844 | glypican 6                                  | 1.215 | 28.61 | 0.52719 | 9280 M  | 1.075  | 13.58 | 0.14533 | 3949  |
| Laptm4b       | A_52_P470316 | NM_033521    | lysosomal-associated protein transmemb      | 1.215 | 42.28 | 0.43663 | 7535 P  | -1.045 | 44.4  | 0.55907 | 9099  |
| 2400001E08Rik | A_51_P338674 | NM_025605    | RIKEN cDNA 2400001E08 gene                  | 1.214 | 45.92 | 0.46206 | 8286 P  | 1.084  | 11.33 | 0.12278 | 3558  |
| Anapc5        | A_52_P143847 | NM_021505    | anaphase-promoting complex subunit 5        | 1.214 | 53.87 | 0.55251 | 10523 P | 1.012  | 42.43 | 0.9012  | 12106 |
| Rpl19         | A_51_P415162 | NM_009078    | ribosomal protein L19                       | 1.214 | 57.76 | 0.6354  | 11743 M | 1.03   | 30.75 | 0.482   | 8338  |
| Rps25         | A_51_P274768 | NM_024266    | ribosomal protein S25                       | 1.214 | 77.44 | 0.84202 | 20184 M | 1.035  | 38.4  | 0.76979 | 10929 |
| Sdha          | A_51_P410823 | NM_023281    | succinate dehydrogenase complex, subun      | 1.214 | 31.88 | 0.39711 | 6439 P  | 1.119  | 8.32  | 0.0996  | 3097  |
| Ubc           | A_52_P238556 | NM_019639    | ubiquitin C                                 | 1.214 | 57.76 | 0.64373 | 12022 M | 1.089  | 11.33 | 0.14341 | 3910  |
| Cfl2          | A_51_P302149 | NM_007688    | cofilin 2, muscle                           | 1.213 | 45.92 | 0.45858 | 8165 P  | 1.443  | 2.04  | 0.07534 | 2541  |
| ErbB2ip       | A_51_P148512 | AK079640     | ErbB2 interacting protein                   | 1.213 | 69.29 | 0.70795 | 18825 P | 1.028  | 33.49 | 0.56587 | 9169  |
| Erp29         | A_51_P133670 | NM_026129    | endoplasmic reticulum protein 29            | 1.213 | 57.76 | 0.57363 | 12168 P | 1.073  | 16.2  | 0.20543 | 4980  |
| Psenen        | A_51_P374268 | NM_025498    | presenilin enhancer 2 homolog (C. elegan    | 1.213 | 38.68 | 0.56935 | 9721 M  | -1.021 | 49.22 | 0.75078 | 10795 |
| Senp2         | A_52_P101972 | AK009212     | SUMO/sentrin specific peptidase 2           | 1.213 | 57.76 | 0.54987 | 11431 P | -1.233 | 0.75  | 0.0148  | 633   |
| Wwp1          | A_52_P165455 | NM_177327    | WW domain containing E3 ubiquitin prot      | 1.213 | 65.79 | 0.64012 | 15679 P | -1.079 | 33.49 | 0.36413 | 7074  |
| 2010305A19Rik | A_52_P504342 | NM_027250    | RIKEN cDNA 2010305A19 gene                  | 1.212 | 57.76 | 0.55882 | 11691 P | 1.064  | 19.02 | 0.24091 | 5510  |
| E430025E21Rik | A_52_P685310 | NM_153548    | RIKEN cDNA E430025E21 gene                  | 1.212 | 53.87 | 0.53141 | 10781 P | 1.012  | 42.43 | 0.86005 | 11681 |
| Flt1          | A_52_P650151 | AK084177     | FMS-like tyrosine kinase 1                  | 1.212 | 45.92 | 0.46016 | 8221 P  | -1.005 | 49.48 | 0.92932 | 12381 |
| Pop5          | A_51_P490198 | NM_026398    | processing of precursor 5, ribonuclease P   | 1.212 | 49.93 | 0.48917 | 9208 P  | -1.153 | 3.01  | 0.04588 | 1721  |
| Qk            | A_51_P434670 | NM_021881    | quaking                                     | 1.212 | 61.79 | 0.60765 | 13814 P | 1.1    | 9.71  | 0.08012 | 2657  |
| Rap1a         | A_51_P228632 | NM_145541    | RAS-related protein-1a                      | 1.212 | 57.76 | 0.56213 | 11797 P | 1.103  | 9.71  | 0.11206 | 3317  |
| Rps11         | A_52_P169005 | AK002987     | ribosomal protein S11                       | 1.212 | 38.68 | 0.56811 | 9689 M  | 1.037  | 33.49 | 0.59766 | 9429  |

|               |               |              |                                                                      |       |       |         |         |        |       |         |       |
|---------------|---------------|--------------|----------------------------------------------------------------------|-------|-------|---------|---------|--------|-------|---------|-------|
| St6gal2       | A_52_P519924  | AK129462     | beta galactoside alpha 2,6 sialyltransferase                         | 1.212 | 65.79 | 0.59503 | 11974 M | -1.223 | 0.51  | 0.00921 | 332   |
| Dnajc8        | A_51_P264478  | NM_172400    | Dnaj (Hsp40) homolog, subfamily C, member 8                          | 1.211 | 38.68 | 0.42094 | 7087 P  | 1.063  | 19.02 | 0.28592 | 6166  |
| Fbxo7         | A_51_P188135  | NM_153195    | F-box protein 7                                                      | 1.211 | 53.87 | 0.51255 | 10037 P | 1.088  | 11.33 | 0.11754 | 3429  |
| Hnrpul1       | A_52_P243307  | NM_144922    | heterogeneous nuclear ribonucleoprotein U                            | 1.211 | 72.2  | 0.77314 | 22407 P | 1.17   | 2.53  | 0.01663 | 714   |
| Mbd1          | A_52_P131423  | AK007371     | methyl-CpG binding domain protein 1                                  | 1.211 | 65.79 | 0.67305 | 17224 M | 1.07   | 19.02 | 0.24589 | 5582  |
| Snn           | A_52_P295067  | NM_009223    | stannin                                                              | 1.211 | 61.79 | 0.6189  | 14396 P | 1.022  | 36.07 | 0.59423 | 9380  |
| Adra1a        | A_52_P424778  | NM_013461    | adrenergic receptor, alpha 1a                                        | 1.21  | 65.79 | 0.67859 | 17385 P | -1.077 | 25.31 | 0.16736 | 4335  |
| Rps24         | A_52_P100002  | AK135247     | ribosomal protein S24                                                | 1.21  | 65.79 | 0.65952 | 16563 P | 1.001  | 42.43 | 0.98055 | 12850 |
| Rps9          | A_51_P436928  | NM_029767    | ribosomal protein S9                                                 | 1.21  | 53.87 | 0.62794 | 11517 M | 1.091  | 16.2  | 0.28604 | 6171  |
| 1700080G18Rik | A_51_P154840  | XM_001000195 | RIKEN cDNA 1700080G18 gene                                           | 1.209 | 75.14 | 0.7912  | 23541 P | 1.017  | 40.63 | 0.70826 | 10393 |
| Aatf          | A_52_P37658   | NM_019816    | apoptosis antagonizing transcription factor 1                        | 1.209 | 57.76 | 0.56706 | 11932 P | 1.077  | 13.58 | 0.134   | 3742  |
| Chchd3        | A_52_P598478  | AK145337     | coiled-coil-helix-coiled-coil-helix domain containing protein 3      | 1.209 | 75.14 | 0.77768 | 22630 P | -1.072 | 22.1  | 0.14735 | 3988  |
| Gtpbp4        | A_52_P670725  | NM_027000    | GTP binding protein 4                                                | 1.209 | 61.79 | 0.62329 | 14605 P | 1.127  | 16.2  | 0.40049 | 7522  |
| Idh1          | A_51_P132978  | NM_010497    | isocitrate dehydrogenase 1 (NADP+), soluble                          | 1.209 | 75.14 | 0.78974 | 23414 P | 1.149  | 11.33 | 0.27354 | 6005  |
| Snx15         | A_52_P462106  | AK165527     | snx15                                                                | 1.209 | 61.79 | 0.59402 | 13174 P | 1.095  | 19.02 | 0.37526 | 7224  |
| Xpo6          | A_52_P1091624 | AK088433     | exportin 6                                                           | 1.209 |       | 0.71703 | 14218 A | 1.131  | 8.32  | 0.12354 | 3569  |
| Adipor2       | A_51_P257151  | AK046591     | adiponectin receptor 2                                               | 1.208 | 61.79 | 0.61882 | 14386 P | 1.093  | 13.58 | 0.1687  | 4364  |
| Arl6          | A_51_P146576  | NM_019665    | ADP-ribosylation factor-like 6                                       | 1.208 | 61.79 | 0.59116 | 13016 P | 1.028  | 40.63 | 0.87198 | 11785 |
| Arsa          | A_51_P310649  | NM_009713    | arylsulfatase A                                                      | 1.208 | 72.2  | 0.76216 | 21756 P | 1.074  | 19.02 | 0.72823 | 6066  |
| Cbx3          | A_52_P397231  | AK017958     | chromobox homolog 3 (Drosophila HP1 group)                           | 1.208 | 83.95 | 0.78136 | 20060 M | 1.081  | 19.02 | 0.34462 | 6817  |
| Cox7a2        | A_52_P37894   | NM_009945    | cytochrome c oxidase, subunit VIIa 2                                 | 1.208 | 75.14 | 0.80515 | 18219 M | 1.075  | 22.1  | 0.39637 | 7485  |
| Dgcr6         | A_51_P118712  | NM_010047    | DiGeorge syndrome critical region gene 6                             | 1.208 | 53.87 | 0.52791 | 10654 P | 1.116  | 9.71  | 0.10184 | 3145  |
| Efh2          | A_52_P429308  | NM_025994    | EF hand domain containing 2                                          | 1.208 | 61.79 | 0.60643 | 13749 P | -1.04  | 43.75 | 0.40275 | 7546  |
| Exosc2        | A_51_P195023  | NM_144886    | exosome component 2                                                  | 1.208 | 53.87 | 0.5181  | 10271 P | -1.247 | 0.51  | 0.00731 | 248   |
| Igf2bp3       | A_51_P302336  | NM_023670    | insulin-like growth factor 2 mRNA binding protein 3                  | 1.208 | 69.29 | 0.6901  | 17928 P | 1.329  | 0.24  | 0.00584 | 102   |
| Pcsk5         | A_52_P544043  | BC013068     | proprotein convertase subtilisin/kexin type 5                        | 1.208 | 65.79 | 0.63638 | 15558 P | -1.327 | 0.51  | 0.00654 | 192   |
| Ppargc1b      | A_51_P294891  | NM_133249    | peroxisome proliferative activated receptor gamma coactivator 1 beta | 1.208 | 53.87 | 0.50704 | 9888 P  | 1.037  | 28.13 | 0.40407 | 7559  |
| Rps20         | A_52_P5210    | NM_026147    | ribosomal protein S20                                                | 1.208 | 57.76 | 0.64276 | 11989 M | 1.006  | 42.43 | 0.96431 | 12698 |
| Atp6v1b2      | A_51_P190845  | NM_007509    | ATPase, H+ transporting, lysosomal V1 subunit b2                     | 1.207 | 49.93 | 0.49788 | 9551 P  | 1.201  | 2.04  | 0.01651 | 708   |
| Dnaja1        | A_51_P303346  | NM_008298    | Dnaj (Hsp40) homolog, subfamily A, member 1                          | 1.207 | 65.79 | 0.65972 | 16576 P | -1.302 | 0.66  | 0.02044 | 879   |
| Fgfr3         | A_51_P322906  | NM_008010    | fibroblast growth factor receptor 3                                  | 1.207 | 49.93 | 0.50315 | 9805 P  | 1.1    | 19.02 | 0.45346 | 8032  |
| Lims2         | A_51_P151862  | NM_144862    | LIM and senescent cell antigen like domain containing protein 2      | 1.207 | 61.79 | 0.61973 | 14440 P | -1.01  | 49.48 | 0.83625 | 11498 |
| Myct1         | A_52_P13389   | NM_026793    | myc target 1                                                         | 1.207 | 35.45 | 0.41496 | 6893 P  | -1.037 | 46.3  | 0.63636 | 9775  |
| Txndc9        | A_52_P345777  | NM_172054    | thioredoxin domain containing 9                                      | 1.207 | 53.87 | 0.52825 | 10671 P | -1.106 | 19.02 | 0.22137 | 5228  |
| Bap1          | A_52_P680311  | NM_027088    | Bra1 associated protein 1                                            | 1.206 | 81.02 | 0.89165 | 28451 M | 1.131  | 6.98  | 0.05481 | 1999  |
| Lepr          | A_52_P247900  | U42467       | leptin receptor                                                      | 1.206 | 53.87 | 0.53797 | 10985 P | -1.172 | 3.01  | 0.05718 | 2067  |
| Ptgs1         | A_51_P279100  | NM_008969    | prostaglandin-endoperoxide synthase 1                                | 1.206 | 69.29 | 0.69665 | 18223 P | 1.01   | 42.43 | 0.89809 | 12043 |
| Rdh14         | A_52_P169198  | AK014097     | retinol dehydrogenase 14 (all-trans and 9-cis)                       | 1.206 | 45.92 | 0.4726  | 8685 P  | 1.183  | 3.46  | 0.03605 | 1398  |
| Rit1          | A_52_P515370  | AK168254     | Ras-like without CAAX 1                                              | 1.206 | 45.92 | 0.4726  | 8671 P  | 1.134  | 5.75  | 0.05188 | 1907  |
| Sfn5          | A_51_P234864  | NM_178639    | sideroflexin 5                                                       | 1.206 | 61.79 | 0.63034 | 15141 P | -1.045 | 42.43 | 0.33697 | 6750  |
| Ucp2          | A_52_P499675  | NM_011671    | uncoupling protein 2 (mitochondrial, proton carrier)                 | 1.206 |       | 0.81904 | 13829 A | 1.174  | 4.63  | 0.06242 | 2208  |
| Cdc215        | A_52_P585621  | AK173265     | cell division cycle 2-like 5 (cholinesterase-related)                | 1.205 | 69.29 | 0.71151 | 19046 P | 1.029  | 33.49 | 0.53852 | 8922  |
| Es1           | A_52_P342860  | NM_007954    | esterase 1                                                           | 1.205 | 83.36 | 0.92749 | 31144 M | 1.133  | 6.98  | 0.05661 | 2046  |
| Isl2          | A_51_P334335  | NM_027397    | insulin related protein 2 (islet 2)                                  | 1.205 | 82.34 | 0.92253 | 33235 M | -1.077 | 22.1  | 0.13908 | 3829  |
| Mrps14        | A_51_P293612  | NM_025474    | mitochondrial ribosomal protein S14                                  | 1.205 | 53.87 | 0.5233  | 10462 P | 1.045  | 33.49 | 0.64368 | 9823  |
| Phip          | A_51_P375431  | XM_358384    | pleckstrin homology domain interacting protein 1                     | 1.205 | 65.79 | 0.65572 | 16363 P | 1.037  | 33.49 | 0.66052 | 9978  |
| Scpep1        | A_51_P118417  | NM_029023    | serine carboxypeptidase 1                                            | 1.205 | 72.2  | 0.77015 | 22198 P | -1.1   | 13.58 | 0.12083 | 3505  |
| Ypel5         | A_51_P311694  | NM_027166    | yippe-like 5 (Drosophila)                                            | 1.205 | 49.93 | 0.48921 | 9212 P  | 1.127  | 8.32  | 0.11241 | 3321  |
| 2900010J23Rik | A_51_P444401  | AK039840     | RIKEN cDNA 2900010J23 gene                                           | 1.204 | 72.2  | 0.72951 | 20196 P | 1.204  | 3.01  | 0.02825 | 1148  |
| Adcy7         | A_51_P441622  | NM_007406    | adenylate cyclase 7                                                  | 1.204 | 69.29 | 0.71674 | 19330 P | -1.033 | 45.68 | 0.53576 | 8893  |
| Cdk5rap3      | A_52_P151949  | NM_030248    | CDK5 regulatory subunit associated protein 3                         | 1.204 | 65.79 | 0.65596 | 16389 P | 1.056  | 25.31 | 0.47406 | 8236  |
| Echdc3        | A_51_P475378  | NM_024208    | enoyl Coenzyme A hydratase domain containing protein 3               | 1.204 | 69.29 | 0.696   | 18182 P | 1.035  | 30.75 | 0.42883 | 7812  |
| Eng           | A_51_P268563  | NM_007932    | endoglin                                                             | 1.204 | 65.79 | 0.6375  | 15595 P | 1.085  | 11.33 | 0.13126 | 3692  |



|               |              |              |                                                                             |       |       |         |         |        |       |         |       |
|---------------|--------------|--------------|-----------------------------------------------------------------------------|-------|-------|---------|---------|--------|-------|---------|-------|
| Hibch         | A_51_P178735 | NM_146108    | 3-hydroxyisobutyryl-Coenzyme A hydrolase                                    | 1.204 | 35.45 | 0.41934 | 7007 P  | 1.023  | 38.4  | 0.71821 | 10472 |
| Rragc         | A_52_P202725 | NM_017475    | Ras-related GTP binding C                                                   | 1.204 | 49.93 | 0.49841 | 9605 P  | 1.186  | 2.53  | 0.01896 | 798   |
| Wnt8a         | A_51_P240811 | NM_009290    | wingless-related MMTV integration site 8                                    | 1.204 |       | 0.90781 | 12842 A | 1.068  | 13.58 | 0.14235 | 3892  |
| Atp6v1f       | A_51_P310539 | NM_025381    | ATPase, H+ transporting, lysosomal V1 subunit                               | 1.203 | 65.79 | 0.56811 | 10967 P | -1.091 | 30.75 | 0.33009 | 6662  |
| Pafah1b1      | A_52_P181038 | AK147309     | platelet-activating factor acetylhydrolase, cytosolic                       | 1.203 | 57.76 | 0.56736 | 11943 P | 1.027  | 38.4  | 0.72735 | 10542 |
| Rpl24         | A_52_P405893 | NM_024218    | ribosomal protein L24                                                       | 1.203 | 65.79 | 0.71034 | 14380 M | -1.193 | 3.01  | 0.06822 | 2369  |
| Col15a1       | A_51_P159792 | NM_009928    | procollagen, type XV                                                        | 1.202 | 72.2  | 0.72815 | 20127 P | 1.035  | 30.75 | 0.49613 | 8527  |
| Cops5         | A_52_P240090 | AK133073     | COP9 (constitutive photomorphogenic) homolog                                | 1.202 | 65.79 | 0.65861 | 16527 P | 1.008  | 42.43 | 0.88007 | 11861 |
| Mvp           | A_52_P46085  | NM_080638    | major vault protein                                                         | 1.202 | 61.79 | 0.61067 | 13985 P | 1.257  | 2.04  | 0.02358 | 988   |
| Ndrg1         | A_51_P405606 | NM_010884    | N-myc downstream regulated gene 1                                           | 1.202 | 61.79 | 0.60523 | 13699 P | 1.202  | 2.04  | 0.01366 | 576   |
| Ndubf2        | A_51_P361184 | NM_026612    | NADH dehydrogenase (ubiquinone) 1 beta subunit                              | 1.202 | 49.93 | 0.61474 | 11108 M | -1.078 | 22.1  | 0.15998 | 4215  |
| Prrg2         | A_52_P329917 | NM_022999    | proline-rich Gla (G-carboxyglutamic acid) domain                            | 1.202 | 65.79 | 0.63405 | 15406 P | -1.035 | 45.05 | 0.50219 | 8604  |
| Rora          | A_52_P652950 | AK087905     | RAR-related orphan receptor alpha                                           | 1.202 | 65.79 | 0.65148 | 16134 P | -1.046 | 43.15 | 0.38617 | 7349  |
| Snx2          | A_51_P347177 | NM_026386    | sorting nexin 2                                                             | 1.202 | 61.79 | 0.60922 | 13903 P | -1.029 | 46.85 | 0.58692 | 9313  |
| Ttc1          | A_52_P451041 | NM_133795    | tetratricopeptide repeat domain 1                                           | 1.202 | 72.2  | 0.75517 | 21408 P | 1.101  | 9.71  | 0.08544 | 2781  |
| 1600012F09Rik | A_51_P309618 | NM_025904    | RIKEN cDNA 1600012F09 gene                                                  | 1.201 | 53.87 | 0.5246  | 10524 P | -1.099 | 11.33 | 0.09869 | 3077  |
| Cast          | A_52_P638903 | AK037098     | calpastatin                                                                 | 1.201 | 45.92 | 0.46466 | 8373 P  | 1.056  | 28.13 | 0.52089 | 8760  |
| Fmo1          | A_52_P408245 | AK034946     | flavin containing monooxygenase 1                                           | 1.201 | 61.79 | 0.60052 | 13475 P | 1.1    | 9.71  | 0.08551 | 2785  |
| Gata6         | A_52_P176245 | NM_010258    | GATA binding protein 6                                                      | 1.201 | 75.14 | 0.78158 | 22839 P | -1.166 | 1.62  | 0.0271  | 1102  |
| Gdf6          | A_52_P28960  | NM_013526    | growth differentiation factor 6                                             | 1.201 |       | 0.64627 | 11736 A | 1.128  | 11.33 | 0.21849 | 5175  |
| Mga           | A_52_P474871 | NM_013720    | MAX gene associated                                                         | 1.201 | 61.79 | 0.58294 | 12665 P | 1.13   | 6.98  | 0.0795  | 2647  |
| Ncam1         | A_52_P684037 | NM_010875    | neural cell adhesion molecule 1                                             | 1.201 | 49.93 | 0.49385 | 9400 P  | 1.058  | 22.1  | 0.31071 | 6461  |
| Prdx3         | A_51_P100828 | NM_007452    | peroxiredoxin 3                                                             | 1.201 | 57.76 | 0.57322 | 12150 P | 1.037  | 30.75 | 0.46758 | 8183  |
| Abcd4         | A_51_P138760 | NM_008992    | ATP-binding cassette, sub-family D (ALD), member 4                          | 1.2   | 69.29 | 0.6835  | 17573 P | 1.017  | 38.4  | 0.68976 | 10238 |
| Ap2b1         | A_51_P213641 | NM_001035854 | adaptor-related protein complex 2, beta 1 subunit                           | 1.2   | 65.79 | 0.65228 | 16194 P | 1.099  | 8.32  | 0.07034 | 2406  |
| Atp6v1g1      | A_51_P140171 | NM_024173    | ATPase, H+ transporting, lysosomal V1 subunit                               | 1.2   | 75.14 | 0.81786 | 18815 M | 1.069  | 28.13 | 0.55992 | 9109  |
| Atrn1         | A_52_P584293 | NM_181415    | attractin like 1                                                            | 1.2   | 69.29 | 0.68802 | 17825 P | 1.149  | 3.46  | 0.0243  | 1003  |
| D130062J10Rik | A_52_P723436 | AK051660     | RIKEN cDNA D130062J10 gene                                                  | 1.2   | 65.79 | 0.65687 | 16422 M | 1      | 42.43 | 0.99655 | 13021 |
| H2afz         | A_52_P468268 | NM_016750    | H2A histone family, member Z                                                | 1.2   | 61.79 | 0.60369 | 13614 P | 1.075  | 28.13 | 0.63491 | 9761  |
| Hmgcs2        | A_51_P116039 | NM_008256    | 3-hydroxy-3-methylglutaryl-Coenzyme A synthase                              | 1.2   |       | 0.773   | 16670 A | -1.196 | 5.75  | 0.1534  | 4099  |
| Hoxa1         | A_51_P351975 | NM_010449    | homeo box A1                                                                | 1.2   | 81.02 | 0.83461 | 24849 M | 1.065  | 22.1  | 0.31613 | 6541  |
| Neu1          | A_52_P58524  | NM_010893    | neuraminidase 1                                                             | 1.2   | 53.87 | 0.52764 | 10622 P | 1.099  | 22.1  | 0.49376 | 8483  |
| Ppp1r16b      | A_52_P449974 | NM_153089    | protein phosphatase 1, regulatory (inhibitor)                               | 1.2   | 49.93 | 0.53102 | 9849 M  | 1.051  | 25.31 | 0.40049 | 7521  |
| Rpl35         | A_51_P132715 | NM_025592    | ribosomal protein L35                                                       | 1.2   | 49.93 | 0.61247 | 11068 M | -1.064 | 43.75 | 0.59225 | 9357  |
| Zfp341        | A_51_P330701 | NM_199304    | zinc finger protein 341                                                     | 1.2   | 61.79 | 0.60765 | 13809 P | -1.006 | 49.48 | 0.9357  | 12444 |
| 5830417I10Rik | A_51_P443443 | AY040842     | RIKEN cDNA 5830417I10 gene                                                  | 1.199 | 65.79 | 0.65195 | 16167 P | 1.078  | 11.33 | 0.12116 | 3522  |
| 6530403A03Rik | A_52_P169028 | NM_026382    | RIKEN cDNA 6530403A03 gene                                                  | 1.199 | 72.2  | 0.74552 | 20871 P | 1.127  | 19.02 | 0.47613 | 8273  |
| Kctd2         | A_51_P272448 | NM_183285    | potassium channel tetramerisation domain                                    | 1.199 | 45.92 | 0.46682 | 8434 P  | 1.161  | 3.82  | 0.03558 | 1381  |
| Psmd10        | A_51_P225123 | NM_016883    | proteasome (prosome, macropain) 26S subunit                                 | 1.199 | 72.2  | 0.76438 | 21886 P | -1.022 | 48.7  | 0.72187 | 10510 |
| Syne1         | A_51_P305777 | NM_153399    | synaptic nuclear envelope 1                                                 | 1.199 | 65.79 | 0.6532  | 16281 P | -1.077 | 25.31 | 0.16343 | 4276  |
| Atp5o         | A_51_P365521 | NM_138597    | ATP synthase, H+ transporting, mitochondrial                                | 1.198 | 49.93 | 0.62794 | 11511 M | 1.09   | 11.33 | 0.11006 | 3268  |
| Prelp         | A_52_P486260 | NM_054077    | proline arginine-rich end leucine-rich repeat                               | 1.198 | 72.2  | 0.76368 | 21867 P | 1.038  | 28.13 | 0.39045 | 7397  |
| Zfp180        | A_52_P224818 | NM_001045486 | zinc finger protein 180                                                     | 1.198 |       | 0.91029 | 12919 A | 1.042  | 30.75 | 0.47882 | 8296  |
| Dot1l         | A_52_P207728 | NM_199322    | DOT1-like, histone H3 methyltransferase 1                                   | 1.197 | 69.29 | 0.68762 | 17805 P | -1.133 | 4.63  | 0.05927 | 2125  |
| E230022H04Rik | A_51_P168172 | AK030009     | AMME chromosomal region gene 1-like                                         | 1.197 | 82.34 | 0.84679 | 25695 P | 1.197  | 4.63  | 0.08375 | 2748  |
| Eef1a1        | A_51_P118765 | NM_010106    | eukaryotic translation elongation factor 1A                                 | 1.197 | 75.14 | 0.82024 | 18929 M | 1.166  | 4.63  | 0.0453  | 1700  |
| Efha1         | A_51_P441782 | NM_028643    | EF hand domain family A1                                                    | 1.197 | 45.92 | 0.4726  | 8689 P  | 1.253  | 3.01  | 0.04276 | 1609  |
| Ilk           | A_51_P138651 | NM_010562    | integrin linked kinase                                                      | 1.197 | 53.87 | 0.51739 | 10210 P | 1.092  | 11.33 | 0.12271 | 3555  |
| Nme3          | A_51_P395111 | NM_019730    | expressed in non-metastatic cells 3                                         | 1.197 | 45.92 | 0.47599 | 8821 P  | 1.059  | 19.02 | 0.21716 | 5155  |
| Rab32         | A_51_P293688 | NM_026405    | RAB32, member RAS oncogene family                                           | 1.197 | 77.44 | 0.83348 | 26369 P | 1.092  | 19.02 | 0.40749 | 7591  |
| Tbx19         | A_52_P95930  | NM_032005    | T-box 19                                                                    | 1.197 | 45.92 | 0.48392 | 9049 M  | 1.048  | 28.13 | 0.51414 | 8714  |
| Adamts10      | A_52_P671784 | NM_172619    | a disintegrin-like and metallopeptidase (with thrombospondin type 1 motifs) | 1.196 | 57.76 | 0.57504 | 11740 M | 1.092  | 9.71  | 0.08026 | 2667  |
| Lbp           | A_51_P454008 | NM_008489    | lipopolysaccharide binding protein                                          | 1.196 | 65.79 | 0.65853 | 16521 P | 1.047  | 25.31 | 0.38785 | 7372  |

|               |               |              |                                             |       |       |         |         |        |       |         |       |
|---------------|---------------|--------------|---------------------------------------------|-------|-------|---------|---------|--------|-------|---------|-------|
| Mki67ip       | A_51_P250647  | NM_026472    | Mki67 (FHA domain) interacting nucleolar    | 1.196 | 57.76 | 0.54744 | 11319 P | 1.061  | 28.13 | 0.55557 | 9072  |
| Psmc4         | A_52_P10254   | NM_011874    | proteasome (prosome, macropain) 26S su      | 1.196 | 42.28 | 0.45748 | 8122 P  | -1.113 | 19.02 | 0.21374 | 5093  |
| Rab11fip4     | A_52_P40832   | AK147344     | RAB11 family interacting protein 4 (class I | 1.196 | 61.79 | 0.60906 | 13897 P | 1.227  | 3.46  | 0.05543 | 2017  |
| Rps15         | A_51_P195997  | NM_009091    | ribosomal protein S15                       | 1.196 | 53.87 | 0.63042 | 11603 M | 1.033  | 38.4  | 0.79018 | 11094 |
| Ahr           | A_51_P449133  | NM_013464    | aryl-hydrocarbon receptor                   | 1.195 | 57.76 | 0.54463 | 11184 P | -1.068 | 28.13 | 0.19731 | 4860  |
| Commd10       | A_51_P362209  | NM_178377    | COMM domain containing 10                   | 1.195 | 57.76 | 0.55303 | 11535 P | -1.035 | 46.3  | 0.6291  | 9704  |
| Lrpap1        | A_52_P583973  | NM_013587    | low density lipoprotein receptor-related p  | 1.195 | 61.79 | 0.59402 | 13172 P | 1.079  | 19.02 | 0.3314  | 6693  |
| Osbp12        | A_51_P173212  | NM_144500    | oxysterol binding protein-like 2            | 1.195 | 53.87 | 0.52692 | 10602 P | 1.154  | 5.75  | 0.05734 | 2073  |
| Pad12         | A_51_P280117  | NM_008812    | peptidyl arginine deiminase, type II        | 1.195 | 81.02 | 0.88793 | 30136 P | 1.172  | 9.71  | 0.27088 | 5968  |
| Pcdh18        | A_52_P555789  | NM_130448    | protocadherin 18                            | 1.195 | 65.79 | 0.74437 | 16833 M | -1.016 | 49.48 | 0.7315  | 10587 |
| 1810047C23Rik | A_52_P282302  | AK046862     | RIKEN cDNA 1810047C23 gene                  | 1.194 | 61.79 | 0.62217 | 14543 P | 1.02   | 38.4  | 0.70719 | 10385 |
| Arhgap10      | A_52_P51564   | NM_030113    | Rho GTPase activating protein 10            | 1.194 | 81.02 | 0.70294 | 13063 M | -1.117 | 25.31 | 0.35264 | 6911  |
| Chrac1        | A_52_P106537  | NM_053068    | chromatin accessibility complex 1           | 1.194 | 57.76 | 0.58129 | 12613 P | -1.006 | 49.48 | 0.89318 | 11994 |
| Edem1         | A_52_P86417   | NM_138677    | ER degradation enhancer, mannosidase a      | 1.194 | 61.79 | 0.59596 | 13290 P | 1.022  | 36.07 | 0.60895 | 9513  |
| Mfsd1         | A_51_P500550  | NM_025813    | major facilitator superfamily domain cont   | 1.194 | 49.93 | 0.51039 | 9952 P  | -1.112 | 8.32  | 0.08606 | 2797  |
| Nme1          | A_51_P253904  | NM_008704    | expressed in non-metastatic cells 1, prote  | 1.194 | 61.79 | 0.6022  | 13541 P | -1.028 | 46.85 | 0.62229 | 9638  |
| Otub1         | A_51_P443393  | NM_134150    | OTU domain, ubiquitin aldehyde binding      | 1.194 | 69.29 | 0.75317 | 16210 M | -1.019 | 49.22 | 0.73074 | 10578 |
| Rpl6          | A_52_P23041   | NM_011290    | ribosomal protein L6                        | 1.194 | 49.93 | 0.62014 | 11311 M | -1.105 | 28.13 | 0.34767 | 6846  |
| Rps29         | A_52_P158090  | NM_009093    | ribosomal protein S29                       | 1.194 | 42.28 | 0.60024 | 10726 M | 1.01   | 42.43 | 0.87739 | 11835 |
| Chrnbl        | A_51_P475342  | NM_009601    | cholinergic receptor, nicotinic, beta polyp | 1.193 | 69.29 | 0.68505 | 17668 P | 1.097  | 16.2  | 0.2807  | 6098  |
| Cpeb4         | A_52_P595824  | NM_026252    | cytoplasmic polyadenylation element bin     | 1.193 | 75.14 | 0.80281 | 24238 P | 1.144  | 8.32  | 0.13823 | 3805  |
| Flywch1       | A_51_P373589  | AK034869     | FLYWCH-type zinc finger 1                   | 1.193 | 61.79 | 0.58305 | 12697 P | 1.063  | 19.02 | 0.2573  | 5768  |
| Gosr2         | A_51_P270939  | NM_019650    | golgi SNAP receptor complex member 2        | 1.193 | 72.2  | 0.7421  | 20700 P | 1.121  | 8.32  | 0.08867 | 2859  |
| Psm14         | A_52_P652212  | NM_021526    | proteasome (prosome, macropain) 26S su      | 1.193 | 61.79 | 0.61213 | 14078 P | -1.097 | 13.58 | 0.11815 | 3440  |
| Sfrs14        | A_51_P147714  | NM_172755    | splicing factor, arginine/serine-rich 14    | 1.193 | 53.87 | 0.52284 | 10444 P | -1.067 | 36.07 | 0.35214 | 6907  |
| Slc31a1       | A_52_P563655  | NM_175090    | solute carrier family 31, member 1          | 1.193 | 49.93 | 0.6061  | 12350 P | 1.102  | 16.2  | 0.35396 | 6936  |
| Zfp236        | A_51_P417321  | AK156842     | zinc finger protein 236                     | 1.193 | 69.29 | 0.72057 | 19572 P | 1.216  | 6.98  | 0.1683  | 4349  |
| 2610301G19Rik | A_52_P288495  | BC021475     | RIKEN cDNA 2610301G19 gene                  | 1.192 | 69.29 | 0.6888  | 17020 M | -1.096 | 8.32  | 0.06763 | 2355  |
| Gdf2          | A_51_P245156  | NM_019506    | growth differentiation factor 2             | 1.192 |       | 0.75984 | 13751 A | 1.056  | 19.02 | 0.24886 | 5629  |
| Metap2        | A_51_P345046  | NM_019648    | methionine aminopeptidase 2                 | 1.192 | 57.76 | 0.57399 | 12192 P | 1.109  | 11.33 | 0.1894  | 4713  |
| Pnpo          | A_51_P246754  | NM_134021    | pyridoxine 5'-phosphate oxidase             | 1.192 | 75.14 | 0.78656 | 23167 P | 1.429  | 0.24  | 0.00637 | 173   |
| Gclm          | A_51_P320089  | NM_008129    | glutamate-cysteine ligase , modifier subu   | 1.191 | 61.79 | 0.62297 | 14582 P | 1.205  | 2.53  | 0.01889 | 793   |
| Gnl3          | A_51_P377376  | NM_178846    | guanine nucleotide binding protein-like 3   | 1.191 | 65.79 | 0.63497 | 15476 P | 1.134  | 11.33 | 0.21645 | 5142  |
| Hspe1         | A_51_P436368  | NM_008303    | heat shock protein 1 (chaperonin 10)        | 1.191 | 65.79 | 0.66118 | 16619 P | 1.23   | 3.01  | 0.0353  | 1365  |
| Macf1         | A_51_P115315  | AK089453     | microtubule-actin crosslinking factor 1     | 1.191 | 53.87 | 0.52753 | 10619 P | 1.058  | 25.31 | 0.47428 | 8244  |
| Nol8          | A_52_P442722  | BC058699     | nucleolar protein 8                         | 1.191 | 75.14 | 0.77139 | 22328 P | -1.017 | 49.48 | 0.9007  | 12086 |
| Pthr1         | A_51_P327874  | NM_011199    | parathyroid hormone receptor 1              | 1.191 | 77.44 | 0.8447  | 27369 P | 1.096  | 9.71  | 0.09438 | 2985  |
| Rian          | A_52_P102630  | AB063319     | RNA imprinted and accumulated in nucle      | 1.191 | 69.29 | 0.6965  | 18198 P | 1.731  | 0     | 0.00584 | 5     |
| Rkhd2         | A_52_P264161  | NM_001039214 | ring finger and KH domain containing 2      | 1.191 | 75.14 | 0.65853 | 13078 M | 1.077  | 22.1  | 0.41301 | 7654  |
| Smarcd1       | A_51_P101765  | NM_031842    | SWI/SNF related, matrix associated, actin   | 1.191 | 61.79 | 0.59446 | 13216 P | 1.183  | 9.71  | 0.27536 | 6030  |
| Tgfb3         | A_51_P124748  | NM_009368    | transforming growth factor, beta 3          | 1.191 | 72.2  | 0.72387 | 19966 P | 1.047  | 25.31 | 0.36346 | 7068  |
| 2310008H09Rik | A_51_P301207  | NM_023197    | RIKEN cDNA 2310008H09 gene                  | 1.19  | 61.79 | 0.62272 | 14565 P | -1.18  | 1.18  | 0.01696 | 734   |
| Ces6          | A_51_P443339  | NM_133960    | carboxylesterase 6                          | 1.19  | 69.29 | 0.71858 | 19431 P | 1.064  | 19.02 | 0.24023 | 5489  |
| Id2           | A_52_P240542  | NM_010496    | inhibitor of DNA binding 2                  | 1.19  | 69.29 | 0.7075  | 18803 P | 1.394  | 2.53  | 0.07422 | 2510  |
| Nola1         | A_51_P274992  | NM_026578    | nucleolar protein family A, member 1 (H/    | 1.19  | 42.28 | 0.46509 | 8389 P  | -1.058 | 40.63 | 0.41248 | 7639  |
| Sra1          | A_51_P226053  | NM_025291    | steroid receptor RNA activator 1            | 1.19  | 53.87 | 0.5136  | 10079 P | 1.04   | 30.75 | 0.53785 | 8918  |
| Stk39         | A_51_P183940  | NM_016866    | serine/threonine kinase 39, STE20/SPS1 f    | 1.19  | 57.76 | 0.55186 | 11490 P | -1.134 | 4.63  | 0.0621  | 2196  |
| Tac2          | A_51_P415087  | NM_009312    | tachykinin 2                                | 1.19  | 75.14 | 0.78992 | 23430 P | -1.344 | 0.51  | 0.00623 | 135   |
| Wac           | A_52_P1084604 | AK079535     | WW domain containing adaptor with coil      | 1.19  | 61.79 | 0.61645 | 14204 P | -1.018 | 49.48 | 0.83907 | 11517 |
| 0610007C21Rik | A_51_P256759  | NM_027855    | RIKEN cDNA 0610007C21 gene                  | 1.189 | 57.76 | 0.67069 | 12906 M | 1.095  | 13.58 | 0.25195 | 5678  |
| AF397014      | A_51_P397200  | NM_138654    | RIKEN cDNA 5033411D12 gene                  | 1.189 | 72.2  | 0.74163 | 20679 P | -1.033 | 45.68 | 0.57761 | 9244  |
| Bnc1          | A_52_P676819  | NM_007562    | basonuclin 1                                | 1.189 |       | 0.91525 | 13040 A | -1.051 | 38.4  | 0.27767 | 6060  |
| Commd2        | A_51_P237775  | NM_175095    | COMM domain containing 2                    | 1.189 | 77.44 | 0.82727 | 25859 P | -1.301 | 0.51  | 0.00627 | 162   |

|               |              |              |                                            |       |       |         |         |        |       |         |       |
|---------------|--------------|--------------|--------------------------------------------|-------|-------|---------|---------|--------|-------|---------|-------|
| Pik3r2        | A_51_P417725 | NM_008841    | phosphatidylinositol 3-kinase, regulatory  | 1.189 | 42.28 | 0.46559 | 8396 P  | 1.12   | 5.75  | 0.04385 | 1638  |
| Prkrir        | A_52_P405193 | NM_028410    | protein-kinase, interferon-inducible doub  | 1.189 | 61.79 | 0.60436 | 13651 P | 1.078  | 13.58 | 0.16594 | 4310  |
| Sfrs12        | A_52_P569594 | AK081447     | splicing factor, arginine/serine-rich 12   | 1.189 | 57.76 | 0.55993 | 11752 P | 1.106  | 22.1  | 0.57318 | 9212  |
| Zfp367        | A_51_P431996 | NM_175494    | zinc finger protein 367                    | 1.189 | 61.79 | 0.58531 | 12779 P | -1.08  | 22.1  | 0.14714 | 3983  |
| 2610101N10Rik | A_52_P294174 | NM_026476    | RIKEN cDNA 2610101N10 gene                 | 1.188 | 53.87 | 0.52245 | 10431 P | 1.097  | 11.33 | 0.14488 | 3946  |
| 5830415L20Rik | A_51_P438028 | AK020011     | RIKEN cDNA 5830415L20 gene                 | 1.188 | 69.29 | 0.69841 | 18292 P | 1.03   | 33.49 | 0.51573 | 8730  |
| Cd14          | A_51_P172853 | NM_009841    | CD14 antigen                               | 1.188 | 65.79 | 0.67032 | 17064 P | -1.43  | 0.51  | 0.01278 | 549   |
| Foxo3a        | A_52_P373852 | AK079567     | forkhead box O3a                           | 1.188 | 69.29 | 0.68995 | 17077 P | 1.023  | 36.07 | 0.62628 | 9682  |
| Rpe           | A_52_P867286 | AK039429     |                                            | 1.188 | 75.14 | 0.7874  | 23216 P | 1.116  | 11.33 | 0.22391 | 5267  |
| Vcam1         | A_51_P210956 | NM_011693    | vascular cell adhesion molecule 1          | 1.188 | 77.44 | 0.8344  | 26481 P | 1.042  | 38.4  | 0.81731 | 11341 |
| 2010007H12Rik | A_51_P103865 | NM_027242    | RIKEN cDNA 2010007H12 gene                 | 1.187 | 69.29 | 0.7094  | 18908 P | -1.389 | 0.51  | 0.00584 | 39    |
| Acbd3         | A_52_P58006  | NM_133225    | acyl-Coenzyme A binding domain contain     | 1.187 | 65.79 | 0.6562  | 16398 P | 1.168  | 2.53  | 0.01782 | 762   |
| Der1l         | A_51_P217236 | NM_024207    | Der1-like domain family, member 1          | 1.187 | 57.76 | 0.54934 | 11398 P | 1.173  | 3.82  | 0.04247 | 1597  |
| Dpysl2        | A_51_P468899 | NM_009955    | dihydropyrimidinase-like 2                 | 1.187 | 72.2  | 0.73083 | 20313 P | 1.022  | 42.43 | 0.86753 | 11734 |
| Gabra1        | A_52_P377537 | NM_010250    | gamma-aminobutyric acid (GABA-A) rece      | 1.187 | 61.79 | 0.61522 | 14171 P | -1.111 | 5.75  | 0.05502 | 2010  |
| Pdk3          | A_52_P99622  | NM_145630    | pyruvate dehydrogenase kinase, isoenzym    | 1.187 | 42.28 | 0.46785 | 8468 P  | 1.017  | 38.4  | 0.69374 | 10271 |
| Tnfrsf1b      | A_52_P228621 | NM_011610    | tumor necrosis factor receptor superfami   | 1.187 |       | 0.73182 | 19076 A | 1.058  | 22.1  | 0.3489  | 6857  |
| Btd           | A_51_P196158 | NM_025295    | biotinidase                                | 1.186 | 65.79 | 0.65158 | 16140 P | 1.022  | 38.4  | 0.71097 | 10410 |
| Cdkn2c        | A_51_P513720 | U19596       | cyclin-dependent kinase inhibitor 2C (p18  | 1.186 | 61.79 | 0.6062  | 13737 P | -1.146 | 5.75  | 0.08819 | 2849  |
| Plce1         | A_52_P415335 | AK122521     | phospholipase C, epsilon 1                 | 1.186 | 75.14 | 0.79472 | 23806 P | 1.14   | 8.32  | 0.12601 | 3628  |
| Prkag2        | A_51_P460869 | NM_145401    | protein kinase, AMP-activated, gamma 2     | 1.186 | 61.79 | 0.67999 | 13200 M | 1.3    | 2.04  | 0.04067 | 1546  |
| Txndc11       | A_52_P150988 | NM_029582    | thioredoxin domain containing 11           | 1.186 | 49.93 | 0.49923 | 9635 P  | -1.226 | 0.75  | 0.01444 | 611   |
| Zfpm2         | A_52_P255261 | AK033131     | zinc finger protein, multitype 2           | 1.186 | 65.79 | 0.67018 | 17046 P | 1.067  | 19.02 | 0.25689 | 5764  |
| Acaca         | A_51_P439426 | NM_133360    | acetyl-Coenzyme A carboxylase alpha        | 1.185 | 38.68 | 0.59971 | 11709 M | -1.383 | 0.51  | 0.00584 | 83    |
| Apex2         | A_52_P417148 | NM_029943    | apurinic/aprimidinic endonuclease 2        | 1.185 | 57.76 | 0.55389 | 11559 P | 1.022  | 40.63 | 0.79669 | 11147 |
| D12Erd553e    | A_51_P253883 | NM_029758    | DNA segment, Chr 12, ERATO Doi 553, exp    | 1.185 | 81.02 | 0.91066 | 32004 P | 1.11   | 9.71  | 0.1238  | 3575  |
| Ercb5         | A_51_P368332 | NM_011729    | excision repair cross-complementing rode   | 1.185 | 61.79 | 0.60523 | 13701 P | 1.006  | 42.43 | 0.9227  | 12301 |
| Pcbp4         | A_51_P194377 | NM_021567    | poly(rC) binding protein 4                 | 1.185 | 49.93 | 0.49756 | 9535 P  | 1.057  | 25.31 | 0.3976  | 7496  |
| 2210015D19Rik | A_52_P588917 | XM_900750    | RIKEN cDNA 2210015D19 gene                 | 1.184 | 77.44 | 0.82154 | 25478 P | 1.037  | 28.13 | 0.41607 | 7699  |
| Arhgef7       | A_52_P26357  | AK129064     | Rho guanine nucleotide exchange factor (   | 1.184 | 79.26 | 0.86001 | 28227 P | -1.006 | 49.48 | 0.93351 | 12418 |
| Bxdc1         | A_51_P375187 | NM_001042556 | brix domain containing 1                   | 1.184 | 61.79 | 0.60436 | 13655 P | -1.05  | 42.43 | 0.36039 | 7027  |
| Hat1          | A_51_P369636 | NM_026115    | histone aminotransferase 1                 | 1.184 | 77.44 | 0.81539 | 25119 P | 1.015  | 42.43 | 0.78145 | 11005 |
| Hck           | A_51_P499918 | NM_010407    | hemopoietic cell kinase                    | 1.184 | 81.02 | 0.89437 | 30615 P | 1.004  | 42.43 | 0.93817 | 12463 |
| Rufy1         | A_51_P163694 | NM_172557    | RUN and FYVE domain containing 1           | 1.184 | 61.79 | 0.58783 | 12900 P | 1.059  | 25.31 | 0.47848 | 8289  |
| Cdkn1c        | A_51_P339540 | NM_009876    | cyclin-dependent kinase inhibitor 1C (P57  | 1.183 | 72.2  | 0.76244 | 21779 P | -1.14  | 3.01  | 0.03602 | 1394  |
| Etv3          | A_51_P148227 | NM_012051    | ets variant gene 3                         | 1.183 | 57.76 | 0.79935 | 17270 M | 1.162  | 5.75  | 0.0807  | 2674  |
| Fars1b        | A_51_P353360 | NM_011811    | phenylalanyl-tRNA synthetase, beta subu    | 1.183 | 72.2  | 0.75861 | 21540 P | 1.056  | 22.1  | 0.31305 | 6494  |
| Hoxc5         | A_52_P283656 | NM_175730    | homeo box C5                               | 1.183 |       | 0.91818 | 13156 A | -1.068 | 36.07 | 0.3533  | 6928  |
| Mrpl46        | A_51_P335916 | NM_023331    | mitochondrial ribosomal protein L46        | 1.183 | 72.2  | 0.7513  | 21143 P | -1.016 | 49.48 | 0.735   | 10627 |
| Ndufb9        | A_51_P177552 | NM_023172    | NADH dehydrogenase (ubiquinone) 1 bet      | 1.183 | 49.93 | 0.49576 | 9470 P  | 1.073  | 13.58 | 0.14909 | 4031  |
| Psmc4         | A_52_P12869  | AB029144     | proteasome (prosome, macropain) 26S su     | 1.183 | 77.44 | 0.81287 | 24894 P | 1.073  | 13.58 | 0.15931 | 4200  |
| Umps          | A_52_P197627 | NM_009471    | uridine monophosphate synthetase           | 1.183 | 49.93 | 0.51432 | 10100 P | 1.015  | 42.43 | 0.84094 | 11532 |
| 2810028N01Rik | A_52_P29646  | NM_028315    | DIS3 mitotic control homolog (S. cerevisia | 1.182 | 72.2  | 0.72231 | 19782 P | -1.146 | 6.98  | 0.10954 | 3253  |
| Abcb7         | A_52_P360650 | XM_907304    | ATP-binding cassette, sub-family B (MDR/   | 1.182 | 53.87 | 0.542   | 11083 P | 1.107  | 13.58 | 0.285   | 6146  |
| Dctn4         | A_52_P201627 | NM_026302    | dynactin 4                                 | 1.182 | 65.79 | 0.72346 | 15070 M | -1.153 | 3.01  | 0.04002 | 1530  |
| Fbxl19        | A_52_P364386 | NM_172748    | F-box and leucine-rich repeat protein 19   | 1.182 | 69.29 | 0.69049 | 17937 P | -1.079 | 28.13 | 0.23887 | 5469  |
| Golph3l       | A_52_P820985 | NM_146133    | golgi phosphoprotein 3-like                | 1.182 | 61.79 | 0.60765 | 13799 P | 1.094  | 22.1  | 0.52431 | 8791  |
| Ier2          | A_51_P481325 | NM_010499    | immediate early response 2                 | 1.182 | 77.44 | 0.81447 | 25021 P | 1.196  | 13.58 | 0.39897 | 7502  |
| Rp18a         | A_51_P446229 | NM_029751    | Ribosomal protein L18A                     | 1.182 | 49.93 | 0.6417  | 11938 M | 1.031  | 38.4  | 0.75153 | 10801 |
| St13          | A_52_P484550 | NM_133726    | suppression of tumorigenicity 13           | 1.182 | 69.29 | 0.69575 | 18174 P | 1.075  | 25.31 | 0.56462 | 9158  |
| Uros          | A_51_P257832 | NM_009479    | uroporphyrinogen III synthase              | 1.182 | 75.14 | 0.80419 | 24363 P | 1.064  | 22.1  | 0.38628 | 7352  |
| Atp6v0b       | A_51_P404236 | NM_033617    | ATPase, H+ transporting, lysosomal V0 su   | 1.181 | 75.14 | 0.79846 | 24011 P | -1.075 | 38.4  | 0.40976 | 7607  |
| D7Erd715e     | A_52_P145433 | AK035508     | DNA segment, Chr 7, ERATO Doi 715, exp     | 1.181 | 65.79 | 0.64978 | 16090 P | 1.023  | 36.07 | 0.63129 | 9728  |

|               |              |              |                                              |       |       |         |         |        |       |         |       |
|---------------|--------------|--------------|----------------------------------------------|-------|-------|---------|---------|--------|-------|---------|-------|
| Mlh1          | A_51_P180724 | NM_026810    | mutL homolog 1 (E. coli)                     | 1.181 | 45.92 | 0.49273 | 9356 P  | -1.236 | 0.66  | 0.01141 | 450   |
| Pdhx          | A_51_P149946 | NM_175094    | pyruvate dehydrogenase complex, compo        | 1.181 | 75.14 | 0.80313 | 24263 P | -1.097 | 6.98  | 0.06513 | 2285  |
| Peo1          | A_51_P261585 | NM_153796    | progressive external ophthalmoplegia 1 (f    | 1.181 | 42.28 | 0.50829 | 9516 M  | -1.194 | 1.62  | 0.03969 | 1518  |
| Pgea1         | A_51_P470311 | NM_028634    | PKD2 interactor, golgi and endoplasmic re    | 1.181 | 53.87 | 0.53797 | 10982 P | -1.051 | 36.07 | 0.26039 | 5823  |
| Ppil2         | A_51_P473456 | NM_144954    | peptidylprolyl isomerase (cyclophilin)-like  | 1.181 | 45.92 | 0.49214 | 9340 P  | 1.005  | 42.43 | 0.938   | 12461 |
| Tgfb3         | A_51_P255899 | NM_011578    | transforming growth factor, beta receptor    | 1.181 | 65.79 | 0.64679 | 15956 P | 1.063  | 25.31 | 0.4864  | 8400  |
| Tmem45a       | A_51_P288876 | NM_019631    | transmembrane protein 45a                    | 1.181 | 83.36 | 0.9524  | 35756 P | 1.112  | 13.58 | 0.3004  | 6323  |
| 1500035H01Rik | A_52_P217796 | NM_023831    | RIKEN cDNA 1500035H01 gene                   | 1.18  | 61.79 | 0.59937 | 13415 P | -1.019 | 49    | 0.69325 | 10270 |
| Cited4        | A_52_P426768 | NM_019563    | Cbp/p300-interacting transactivator, with    | 1.18  | 77.44 | 0.84631 | 27507 P | 1.022  | 36.07 | 0.615   | 9576  |
| D10Jhu81e     | A_51_P118320 | NM_138601    | DNA segment, Chr 10, Johns Hopkins Uni       | 1.18  | 65.79 | 0.6703  | 17061 P | -1.14  | 5.75  | 0.09076 | 2910  |
| Fkbp5         | A_52_P481493 | NM_010220    | FK506 binding protein 5                      | 1.18  | 65.79 | 0.62794 | 14870 P | 1.045  | 30.75 | 0.54978 | 9017  |
| Rnf34         | A_51_P509211 | NM_030564    | ring finger protein 34                       | 1.18  | 53.87 | 0.5229  | 10453 P | 1.056  | 28.13 | 0.52201 | 8768  |
| Sfxn1         | A_51_P431576 | AK044490     | sideroflexin 1                               | 1.18  | 65.79 | 0.64492 | 15908 P | -1.015 | 49.48 | 0.81975 | 11353 |
| Txn2          | A_51_P207310 | U85089       | thioredoxin 2                                | 1.18  | 57.76 | 0.62558 | 12262 M | -1.084 | 43.75 | 0.16545 | 3948  |
| Ugdh          | A_51_P137953 | NM_009466    | UDP-glucose dehydrogenase                    | 1.18  | 57.76 | 0.57477 | 12231 P | 1.064  | 19.02 | 0.26315 | 5853  |
| Wdr31         | A_51_P432724 | NM_023597    | WD repeat domain 31                          | 1.18  | 65.79 | 0.65776 | 16481 P | -1.03  | 46.85 | 0.64368 | 9825  |
| 1500011J06Rik | A_51_P327418 | NM_025438    | arginine/serine-rich coiled-coil 2           | 1.179 | 65.79 | 0.65715 | 16452 P | 1.048  | 25.31 | 0.33208 | 6703  |
| Ddx46         | A_52_P106739 | NM_145975    | DEAD (Asp-Glu-Ala-Asp) box polypeptide       | 1.179 | 53.87 | 0.52487 | 10530 P | 1.071  | 13.58 | 0.15736 | 4171  |
| Gli1          | A_51_P518548 | NM_010296    | GLI-Kruppel family member GLI1               | 1.179 | 83.95 | 0.75902 | 18691 M | 1.061  | 22.1  | 0.29244 | 6244  |
| Pou2f1        | A_51_P361492 | NM_198934    | POU domain, class 2, transcription factor    | 1.179 | 53.87 | 0.53631 | 10920 P | 1.091  | 11.33 | 0.109   | 3242  |
| Rpl29         | A_52_P217069 | NM_009082    | ribosomal protein L29                        | 1.179 | 49.93 | 0.5664  | 10893 P | 1.009  | 42.43 | 0.86044 | 11684 |
| Usp3          | A_51_P330630 | NM_144937    | ubiquitin specific peptidase 3               | 1.179 | 65.79 | 0.62794 | 14857 P | 1.048  | 28.13 | 0.46898 | 8195  |
| 1110038D17Rik | A_52_P225822 | AK036914     | RIKEN cDNA 1110038D17 gene                   | 1.178 | 65.79 | 0.63237 | 15350 P | 1.081  | 11.33 | 0.12036 | 3502  |
| Asah1         | A_51_P509098 | NM_019734    | N-acylsphingosine amidohydrolase 1           | 1.178 | 45.92 | 0.49852 | 9610 P  | 1.021  | 40.63 | 0.74287 | 10716 |
| Cds2          | A_52_P253915 | NM_138651    | CDP-diacylglycerol synthase (phosphatida     | 1.178 | 65.79 | 0.65256 | 16211 P | 1.013  | 42.43 | 0.91558 | 12222 |
| Galnt1        | A_51_P209518 | NM_013814    | UDP-N-acetyl-alpha-D-galactosamine:pol       | 1.178 | 69.29 | 0.68577 | 17724 P | -1.001 | 49.48 | 0.99567 | 13016 |
| Ldhd          | A_52_P161454 | NM_027570    | lactate dehydrogenase D                      | 1.178 | 65.79 | 0.65625 | 16399 P | -1.01  | 49.48 | 0.86781 | 11741 |
| Med6          | A_51_P332359 | NM_027213    | mediator of RNA polymerase II transcripti    | 1.178 | 65.79 | 0.66359 | 16750 P | 1.078  | 16.2  | 0.25121 | 5665  |
| Mnab          | A_52_P274486 | AK051094     | ring finger and CCCH-type zinc finger dom    | 1.178 | 72.2  | 0.7366  | 20502 P | 1.064  | 25.31 | 0.45651 | 8062  |
| Rpl38         | A_51_P227332 | NM_001048057 | ribosomal protein L38                        | 1.178 | 77.44 | 0.84547 | 20324 M | 1.055  | 30.75 | 0.63014 | 9717  |
| Rps10         | A_51_P169156 | NM_025963    | ribosomal protein S10                        | 1.178 | 61.79 | 0.70241 | 14066 M | 1.097  | 16.2  | 0.31883 | 6562  |
| Slc30a1       | A_51_P300572 | NM_009579    | solute carrier family 30 (zinc transporter), | 1.178 | 49.93 | 0.5101  | 9933 P  | 1.241  | 2.53  | 0.03473 | 1330  |
| Slc3a2        | A_51_P472901 | NM_008577    | solute carrier family 3 (activators of dibas | 1.178 | 72.2  | 0.78777 | 17467 M | 1.166  | 6.98  | 0.11019 | 3271  |
| Vkorc1        | A_51_P395555 | NM_178600    | vitamin K epoxide reductase complex, sut     | 1.178 | 65.79 | 0.78425 | 20538 P | 1.148  | 4.63  | 0.04586 | 1718  |
| Ccnl1         | A_51_P351481 | NM_019937    | cyclin L1                                    | 1.177 | 75.14 | 0.7761  | 22533 P | 1.015  | 42.43 | 0.79037 | 11095 |
| Cdc21l        | A_52_P365803 | BC052920     | cell division cycle 2-like 1                 | 1.177 | 72.2  | 0.7437  | 20759 P | -1.019 | 49.39 | 0.73014 | 10574 |
| E2f6          | A_52_P349216 | AK035116     | E2F transcription factor 6                   | 1.177 | 72.2  | 0.72005 | 19538 P | 1.166  | 6.98  | 0.10973 | 3261  |
| Gc            | A_51_P349961 | NM_008096    | group specific component                     | 1.177 | 77.44 | 0.84032 | 27116 P | -1.216 | 1.18  | 0.0297  | 1184  |
| Glo1          | A_51_P480982 | NM_025374    | glyoxalase 1                                 | 1.177 | 53.87 | 0.65848 | 12480 M | 1.046  | 30.75 | 0.51573 | 8726  |
| Hprt1         | A_51_P239673 | NM_013556    | hypoxanthine guanine phosphoribosyl tra      | 1.177 | 69.29 | 0.74664 | 15964 M | 1.275  | 3.46  | 0.08194 | 2701  |
| Mrpl23        | A_51_P193130 | NM_011288    | mitochondrial ribosomal protein L23          | 1.177 | 49.93 | 0.51764 | 10237 P | -1.052 | 40.63 | 0.31681 | 6546  |
| Rpl26         | A_51_P363515 | NM_009080    | ribosomal protein L26                        | 1.177 | 57.76 | 0.67557 | 13046 M | -1.015 | 49.48 | 0.78383 | 11041 |
| Slc27a3       | A_51_P133252 | NM_011988    | solute carrier family 27 (fatty acid transp  | 1.177 | 61.79 | 0.58459 | 12747 P | 1.033  | 30.75 | 0.47591 | 8269  |
| Srxp2         | A_51_P425047 | NM_026838    | sushi-repeat-containing protein, X-linked    | 1.177 | 61.79 | 0.62327 | 14600 P | -1.093 | 11.33 | 0.09324 | 2968  |
| Stx12         | A_51_P252363 | NM_133887    | syntaxin 12                                  | 1.177 | 53.87 | 0.54443 | 11177 P | -1.058 | 38.4  | 0.32115 | 6576  |
| Stx4a         | A_51_P495492 | NM_009294    | syntaxin 4A (placental)                      | 1.177 | 57.76 | 0.57043 | 12069 P | 1.003  | 42.43 | 0.96107 | 12676 |
| Zfr           | A_52_P213318 | NM_011767    | zinc finger RNA binding protein              | 1.177 | 61.79 | 0.62384 | 14630 P | 1.114  | 8.32  | 0.06417 | 2259  |
| Cdc25c        | A_51_P279575 | NM_009860    | cell division cycle 25 homolog C (S. pomb    | 1.176 | 79.26 | 0.87403 | 29184 P | 1.055  | 22.1  | 0.27929 | 6082  |
| Hace1         | A_51_P512947 | NM_172473    | HECT domain and ankyrin repeat containi      | 1.176 | 57.76 | 0.56085 | 11772 P | -1.259 | 0.51  | 0.00977 | 355   |
| Rab25         | A_52_P149577 | NM_016899    | RAB25, member RAS oncogene family            | 1.176 | 65.79 | 0.6531  | 16267 P | -1.085 | 28.13 | 0.26317 | 5858  |
| Rai14         | A_52_P385229 | NM_030690    | retinoic acid induced 14                     | 1.176 | 69.29 | 0.68708 | 17781 P | 1.077  | 19.02 | 0.36136 | 7032  |
| Sc5d          | A_52_P67637  | AK080673     | sterol-C5-desaturase (fungal ERG3, delta-    | 1.176 | 57.76 | 0.58264 | 12659 P | 1.032  | 33.49 | 0.59555 | 9405  |
| Timm50        | A_52_P682990 | NM_025616    | translocase of inner mitochondrial memb      | 1.176 | 65.79 | 0.65378 | 16299 P | 1.12   | 8.32  | 0.08461 | 2777  |

|               |              |              |                                                                      |       |       |         |         |        |       |         |       |
|---------------|--------------|--------------|----------------------------------------------------------------------|-------|-------|---------|---------|--------|-------|---------|-------|
| Vps28         | A_52_P143121 | NM_025842    | vacuolar protein sorting 28 (yeast)                                  | 1.176 | 57.76 | 0.54911 | 11390 P | 1.05   | 25.31 | 0.32279 | 6594  |
| Aga           | A_51_P119544 | NM_001005847 | aspartylglucosaminidase                                              | 1.175 | 69.29 | 0.70517 | 18681 P | 1.125  | 6.98  | 0.06256 | 2211  |
| Akap13        | A_52_P414750 | XM_133543    | A kinase (PKA) anchor protein 13                                     | 1.175 | 61.79 | 0.70266 | 15125 M | 1.008  | 42.43 | 0.90206 | 12110 |
| Dusp16        | A_51_P242634 | AF345951     | dual specificity phosphatase 16                                      | 1.175 | 61.79 | 0.59355 | 13116 P | -1.01  | 49.48 | 0.82285 | 11392 |
| Eif5b         | A_51_P479659 | NM_198303    | eukaryotic translation initiation factor 5B                          | 1.175 | 75.14 | 0.807   | 24523 P | -1.063 | 33.49 | 0.2718  | 5978  |
| Ets1          | A_52_P258291 | NM_011808    | E26 avian leukemia oncogene 1, 5' domain                             | 1.175 | 81.02 | 0.91011 | 31953 P | -1.013 | 49.48 | 0.7827  | 11017 |
| Pdk2          | A_51_P426276 | NM_133667    | pyruvate dehydrogenase kinase, isoenzyme 2                           | 1.175 | 65.79 | 0.66265 | 16694 P | -1.275 | 0.51  | 0.00756 | 282   |
| Rps8          | A_52_P284672 | NM_009098    | ribosomal protein S8                                                 | 1.175 | 69.29 | 0.70849 | 18864 P | -1.142 | 8.32  | 0.12664 | 3643  |
| Tagln2        | A_52_P35240  | NM_178598    | transgelin 2                                                         | 1.175 | 53.87 | 0.54602 | 11248 P | -1.002 | 49.48 | 0.97376 | 12775 |
| B4galt1       | A_51_P155257 | NM_022305    | UDP-Gal:betaGlcNAc beta 1,4- galactosyltransferase 1                 | 1.174 | 61.79 | 0.60459 | 13665 P | 1.112  | 11.33 | 0.19654 | 4846  |
| D1Bwg1363e    | A_51_P153904 | NM_001001566 | DNA segment, Chr 1, Brigham & Women's Hospital                       | 1.174 | 75.14 | 0.77263 | 22378 P | 1.034  | 33.49 | 0.61332 | 9554  |
| Ddx41         | A_51_P345927 | NM_134059    | DEAD (Asp-Glu-Ala-Asp) box polypeptide family 1 member 41            | 1.174 | 57.76 | 0.57942 | 12445 P | -1.292 | 0.51  | 0.00623 | 133   |
| Lrp2          | A_51_P322000 | XM_130308    | low density lipoprotein receptor-related protein 2                   | 1.174 |       | 0.81096 | 18175 A | 1.066  | 13.58 | 0.1549  | 4126  |
| Meox2         | A_51_P383001 | NM_008584    | mesenchyme homeobox 2                                                | 1.174 | 75.14 | 0.80251 | 24193 P | 1.044  | 36.07 | 0.74695 | 10765 |
| Ncbp2         | A_52_P83321  | NM_026554    | nuclear cap binding protein subunit 2                                | 1.174 | 69.29 | 0.70898 | 18893 P | -1.049 | 40.63 | 0.31325 | 6495  |
| Nfatc3        | A_52_P333419 | NM_010901    | nuclear factor of activated T-cells, cytoplasmic 3                   | 1.174 | 57.76 | 0.5801  | 12504 P | 1.105  | 9.71  | 0.09218 | 2948  |
| Rbms3         | A_51_P497451 | NM_178660    | RNA binding motif, single stranded interaction domain containing 3   | 1.174 | 75.14 | 0.79372 | 23737 P | 1.218  | 2.04  | 0.01643 | 700   |
| 4930402H24Rik | A_51_P293575 | AK089462     | RIKEN cDNA 4930402H24 gene                                           | 1.173 | 57.76 | 0.57556 | 12272 P | 1.061  | 19.02 | 0.27129 | 5974  |
| Adm           | A_51_P265571 | NM_009627    | adrenomedullin                                                       | 1.173 | 69.29 | 0.69373 | 18102 P | 1.103  | 16.2  | 0.3233  | 6596  |
| Atp5j         | A_51_P100866 | NM_016755    | ATP synthase, H+ transporting, mitochondrial F1F0 complex, c subunit | 1.173 | 57.76 | 0.57971 | 12484 P | 1.031  | 33.49 | 0.53586 | 8898  |
| C3            | A_52_P133594 | NM_009778    | complement component 3                                               | 1.173 | 77.44 | 0.66333 | 14868 M | -1.118 | 8.32  | 0.0808  | 2679  |
| F8            | A_51_P289239 | NM_007977    | coagulation factor VIII                                              | 1.173 | 69.29 | 0.7097  | 18928 P | -1.346 | 0.51  | 0.00627 | 147   |
| Hdhd2         | A_52_P450675 | NM_001039201 | haloacid dehalogenase-like hydrolase domain containing 2             | 1.173 | 69.29 | 0.67216 | 17158 P | -1.025 | 48.39 | 0.69861 | 10304 |
| Hp1bp3        | A_52_P224778 | NM_010470    | heterochromatin protein 1, binding protein 3                         | 1.173 | 75.14 | 0.77732 | 22591 P | 1.197  | 4.63  | 0.07882 | 2624  |
| Igsf3         | A_51_P231482 | AK019524     | immunoglobulin superfamily, member 3                                 | 1.173 | 77.44 | 0.82443 | 25674 P | 1.003  | 42.43 | 0.93754 | 12447 |
| Msr1          | A_52_P127130 | NM_031195    | macrophage scavenger receptor 1                                      | 1.173 | 42.28 | 0.63286 | 12907 M | 1.005  | 42.43 | 0.91107 | 12200 |
| Ppih          | A_51_P300759 | NM_028677    | peptidyl prolyl isomerase H                                          | 1.173 | 61.79 | 0.61855 | 14347 P | 1.131  | 8.32  | 0.12167 | 3535  |
| Psmc5         | A_52_P657435 | NM_008950    | protease (prosome, macropain) 26S subunit 5                          | 1.173 | 53.87 | 0.5295  | 10714 P | -1.025 | 47.43 | 0.61206 | 9546  |
| Rpl36a        | A_52_P197926 | NM_019865    | ribosomal protein L36a                                               | 1.173 | 65.79 | 0.71944 | 14765 M | 1.022  | 40.63 | 0.84549 | 11567 |
| Sqstm1        | A_51_P119077 | NM_011018    | sequestosome 1                                                       | 1.173 | 49.93 | 0.65368 | 12324 M | 1.174  | 3.46  | 0.03174 | 1247  |
| Zfp289        | A_52_P466993 | NM_023854    | zinc finger protein 289                                              | 1.173 | 49.93 | 0.51792 | 10262 P | -1.179 | 1.18  | 0.01962 | 833   |
| 1700021K19Rik | A_52_P263490 | NM_172615    | RIKEN cDNA 1700021K19 gene                                           | 1.172 |       | 0.73378 | 15121 A | -1.252 | 0.51  | 0.00744 | 268   |
| E330036119Rik | A_51_P122582 | NM_144915    | diacylglycerol lipase, beta                                          | 1.172 | 77.44 | 0.82952 | 26013 P | -1.035 | 45.68 | 0.54088 | 8952  |
| Ephb4         | A_52_P542612 | NM_010144    | Eph receptor B4                                                      | 1.172 | 75.14 | 0.78047 | 22798 P | 1.045  | 33.49 | 0.66858 | 10030 |
| Mpp5          | A_52_P402881 | BC075698     | membrane protein, palmitoylated 5 (MPP5)                             | 1.172 | 61.79 | 0.61973 | 14433 P | -1.008 | 49.48 | 0.90099 | 12098 |
| Pax4          | A_51_P514224 | NM_011038    | paired box gene 4                                                    | 1.172 | 65.79 | 0.58969 | 11766 M | -1.237 | 1.32  | 0.04507 | 1693  |
| Prdm2         | A_51_P176998 | XM_898822    | PR domain containing 2, with ZNF domain                              | 1.172 | 72.2  | 0.58725 | 12279 M | -1.191 | 2.04  | 0.04712 | 1763  |
| Prkag1        | A_52_P273546 | NM_016781    | protein kinase, AMP-activated, gamma 1 non-catalytic subunit         | 1.172 | 53.87 | 0.53038 | 10752 P | 1.006  | 42.43 | 0.93923 | 12473 |
| Rpl13a        | A_51_P235311 | NM_009438    | ribosomal protein L13a                                               | 1.172 | 69.29 | 0.76604 | 16705 M | 1.016  | 42.43 | 0.89628 | 12016 |
| Shoc2         | A_51_P185941 | NM_019658    | soc-2 (suppressor of clear) homolog (C. elegans)                     | 1.172 | 61.79 | 0.60322 | 13600 P | -1.021 | 49.47 | 0.77211 | 10943 |
| Ube2m         | A_52_P665386 | NM_145578    | ubiquitin-conjugating enzyme E2M (UBC2)                              | 1.172 | 42.28 | 0.49188 | 9318 P  | 1.091  | 11.33 | 0.1534  | 4096  |
| Wasf1         | A_51_P322801 | NM_031877    | WASP family 1                                                        | 1.172 | 72.2  | 0.75318 | 21301 P | -1.113 | 6.98  | 0.06647 | 2333  |
| 2010012C16Rik | A_51_P187018 | NM_025564    | RIKEN cDNA 2010012C16 gene                                           | 1.171 | 61.79 | 0.62672 | 14774 P | 1.006  | 42.43 | 0.92381 | 12332 |
| 5230400G24Rik | A_51_P287931 | NM_029409    | RIKEN cDNA 5230400G24 gene                                           | 1.171 | 57.76 | 0.68445 | 13350 M | -1.049 | 44.4  | 0.59881 | 9436  |
| Abi3          | A_51_P185906 | NM_025659    | ABI gene family, member 3                                            | 1.171 | 81.02 | 0.8844  | 29956 P | 1.056  | 22.1  | 0.31065 | 6456  |
| Cdadc1        | A_52_P327791 | AK032600     | cytidine and dCMP deaminase domain containing 1                      | 1.171 | 69.29 | 0.68154 | 17503 P | 1.007  | 42.43 | 0.89442 | 12005 |
| Mef2a         | A_52_P290579 | NM_001033713 | myocyte enhancer factor 2A                                           | 1.171 | 53.87 | 0.5467  | 11290 P | 1.011  | 42.43 | 0.81576 | 11333 |
| Mib1          | A_52_P437884 | BC083072     | mindbomb homolog 1 (Drosophila)                                      | 1.171 | 42.28 | 0.56539 | 10868 P | 1.203  | 3.46  | 0.03904 | 1469  |
| Mtrr          | A_52_P58318  | NM_172480    | 5-methyltetrahydrofolate-homocysteine methyltransferase              | 1.171 | 61.79 | 0.61962 | 14425 P | -1.039 | 43.75 | 0.40359 | 7553  |
| Myliip        | A_52_P248343 | NM_153789    | myosin regulatory light chain interacting protein 1                  | 1.171 | 75.14 | 0.64538 | 13978 M | -1.008 | 49.48 | 0.89551 | 12014 |
| Nid2          | A_51_P315666 | NM_008695    | nidogen 2                                                            | 1.171 | 72.2  | 0.73378 | 20408 P | 1.127  | 6.98  | 0.0659  | 2316  |
| Ptges2        | A_51_P349008 | NM_133783    | prostaglandin E synthase 2                                           | 1.171 | 65.79 | 0.63447 | 15433 P | -1.044 | 38.4  | 0.29799 | 6299  |
| Rbpsuh        | A_52_P100028 | NM_009035    | recombination signal binding protein for immunoglobulin              | 1.171 | 53.87 | 0.53797 | 10978 P | 1.125  | 8.32  | 0.11024 | 3272  |



|               |              |                    |                                               |       |       |         |         |        |       |         |       |
|---------------|--------------|--------------------|-----------------------------------------------|-------|-------|---------|---------|--------|-------|---------|-------|
| Rps6          | A_51_P344734 | NM_009096          | ribosomal protein S6                          | 1.171 | 61.79 | 0.70381 | 14131 M | 1.165  | 9.71  | 0.2199  | 5206  |
| Rps6kb2       | A_52_P277335 | AK090093           | ribosomal protein S6 kinase, polypeptide      | 1.171 | 72.2  | 0.71858 | 19436 P | 1.091  | 9.71  | 0.08296 | 2727  |
| Sidt2         | A_51_P269303 | AK081177           | SID1 transmembrane family, member 2           | 1.171 | 72.2  | 0.72946 | 20191 P | 1.018  | 38.4  | 0.67517 | 10097 |
| Wbp5          | A_51_P139848 | NM_011712          | WW domain binding protein 5                   | 1.171 | 65.79 | 0.71641 | 14646 M | 1.124  | 16.2  | 0.45518 | 8050  |
| Zfp395        | A_52_P654080 | NM_199029          | zinc finger protein 395                       | 1.171 | 83.95 | 0.70327 | 16258 M | 1.037  | 33.49 | 0.66434 | 9999  |
| 1600020E01Rik | A_52_P617171 | BC029726           | RIKEN cDNA 1600020E01 gene                    | 1.17  | 75.14 | 0.77853 | 22679 P | -1.129 | 3.01  | 0.03532 | 1369  |
| Ercc4         | A_51_P210082 | NM_015769          | excision repair cross-complementing rodent    | 1.17  | 75.14 | 0.77895 | 22702 P | -1.009 | 49.48 | 0.87155 | 11772 |
| Fubp1         | A_52_P438578 | NM_057172          | far upstream element (FUSE) binding protein   | 1.17  | 65.79 | 0.65578 | 16381 P | 1.184  | 4.63  | 0.05995 | 2153  |
| Lin7c         | A_52_P124279 | NM_011699          | lin-7 homolog C (C. elegans)                  | 1.17  | 53.87 | 0.54626 | 11262 P | 1      | 49.48 | 0.99863 | 13044 |
| Lsm1          | A_51_P206655 | NM_026032          | LSM1 homolog, U6 small nuclear RNA associ     | 1.17  | 65.79 | 0.62845 | 14925 P | 1.103  | 11.33 | 0.16599 | 4317  |
| Orc4l         | A_52_P376535 | NM_011958          | origin recognition complex, subunit 4-like    | 1.17  | 75.14 | 0.7931  | 23694 P | -1.174 | 2.04  | 0.04067 | 1550  |
| Pdgfb         | A_51_P175262 | NM_011057          | platelet derived growth factor, B polypeptide | 1.17  | 49.93 | 0.51164 | 9998 P  | -1.038 | 45.68 | 0.59635 | 9411  |
| Pfkfb3        | A_52_P362917 | NM_133232          | 6-phosphofructo-2-kinase/fructose-2,6-bisph   | 1.17  |       | 0.79485 | 15507 A | 1.037  | 33.49 | 0.59709 | 9417  |
| Pklr          | A_51_P176042 | NM_013631          | pyruvate kinase liver and red blood cell iso  | 1.17  | 65.79 | 0.62738 | 14822 P | 1.077  | 16.2  | 0.22252 | 5246  |
| Rpl37a        | A_51_P441263 | NM_009084          | ribosomal protein L37a                        | 1.17  | 65.79 | 0.73334 | 15608 M | -1.113 | 19.02 | 0.22274 | 5254  |
| Eef2          | A_52_P605455 | NM_007907          | eukaryotic translation elongation factor 2    | 1.169 | 61.79 | 0.59916 | 13397 P | 1.305  | 2.53  | 0.05139 | 1887  |
| Glipr1        | A_51_P371051 | NM_028608          | GLI pathogenesis-related 1 (glioma)           | 1.169 | 65.79 | 0.65034 | 16106 P | 1.057  | 25.31 | 0.37242 | 7202  |
| Nfrkb         | A_52_P43456  | AK036381           | nuclear factor related to kappa B binding pr  | 1.169 | 75.14 | 0.79255 | 23645 P | 1.012  | 42.43 | 0.93323 | 12411 |
| Sertad2       | A_52_P238242 | NM_021372          | SERTA domain containing 2                     | 1.169 | 57.76 | 0.55923 | 11721 P | 1.08   | 16.2  | 0.21788 | 5167  |
| Tmem4         | A_51_P342082 | NM_019953          | transmembrane protein 4                       | 1.169 | 65.79 | 0.66359 | 16755 P | 1.013  | 42.43 | 0.85958 | 11675 |
| 0610007P06Rik | A_51_P251717 | NM_026304          | lethal, Chr 7, Rinchik 6                      | 1.168 | 72.2  | 0.7163  | 19297 P | 1.194  | 4.63  | 0.08013 | 2661  |
| Cdk5          | A_51_P157895 | NM_007668          | cyclin-dependent kinase 5                     | 1.168 | 61.79 | 0.60024 | 13452 P | -1.143 | 2.04  | 0.02732 | 1108  |
| Creb1         | A_52_P517730 | NM_009952          | cAMP responsive element binding protein 1     | 1.168 | 61.79 | 0.61645 | 14206 P | 1.057  | 16.2  | 0.20101 | 4916  |
| Dad1          | A_51_P189905 | ENSMUST00000022781 | defender against cell death 1                 | 1.168 | 61.79 | 0.70918 | 14321 M | 1.068  | 30.75 | 0.73134 | 10582 |
| Dnm2          | A_52_P271614 | NM_001039520       | dynamin 2                                     | 1.168 | 57.76 | 0.57556 | 12277 P | 1.142  | 9.71  | 0.16704 | 4330  |
| Extl3         | A_51_P208321 | NM_018788          | exostoses (multiple)-like 3                   | 1.168 | 61.79 | 0.60906 | 13889 P | -1.039 | 44.4  | 0.47929 | 8304  |
| Gata2         | A_51_P516625 | NM_008090          | GATA binding protein 2                        | 1.168 | 57.76 | 0.57768 | 12392 P | 1.01   | 42.43 | 0.88912 | 11953 |
| Il28ra        | A_52_P621588 | NM_174851          | interleukin 28 receptor alpha                 | 1.168 | 61.79 | 0.61195 | 14065 P | -1.01  | 49.48 | 0.93769 | 12453 |
| Pld2          | A_51_P357759 | NM_008876          | phospholipase D2                              | 1.168 | 69.29 | 0.68129 | 17484 P | -1.102 | 16.2  | 0.14805 | 4004  |
| Txnl2         | A_51_P157634 | NM_023140          | thioredoxin-like 2                            | 1.168 | 65.79 | 0.63846 | 15634 P | 1.003  | 42.43 | 0.93762 | 12449 |
| Blzf1         | A_51_P378009 | NM_025505          | basic leucine zipper nuclear factor 1         | 1.167 | 49.93 | 0.51629 | 10175 P | -1.061 | 36.07 | 0.28666 | 6182  |
| Hbld2         | A_52_P167189 | NM_026921          | iron-sulfur cluster assembly 1 homolog (S     | 1.167 | 61.79 | 0.70887 | 14300 M | 1.127  | 5.75  | 0.03933 | 1493  |
| Htatsf1       | A_51_P347452 | NM_028242          | HIV TAT specific factor 1                     | 1.167 | 72.2  | 0.7334  | 20404 P | -1.012 | 49.48 | 0.78435 | 11046 |
| Il1a          | A_52_P100926 | NM_010554          | interleukin 1 alpha                           | 1.167 | 79.26 | 0.85577 | 28024 P | 1.17   | 3.01  | 0.02042 | 874   |
| Rorb          | A_52_P74320  | NM_001043354       | RAR-related orphan receptor beta              | 1.167 |       | 0.82089 | 16423 A | -1.051 | 38.4  | 0.29296 | 6254  |
| Stxbp2        | A_51_P134070 | NM_011503          | syntaxin binding protein 2                    | 1.167 | 69.29 | 0.69282 | 18060 P | -1.103 | 19.02 | 0.21142 | 5060  |
| Zfp85-rs1     | A_52_P560116 | U29505             | zinc finger protein 85, related sequence 1    | 1.167 | 57.76 | 0.58473 | 12755 P | 1.049  | 28.13 | 0.42002 | 7730  |
| Agl           | A_51_P334444 | XM_131166          | amylo-1,6-glucosidase, 4-alpha-glucanotr      | 1.166 | 61.79 | 0.60024 | 13444 P | 1.1    | 16.2  | 0.38104 | 7284  |
| Arvcf         | A_51_P164539 | NM_033474          | armadillo repeat gene deleted in velo-card    | 1.166 | 69.29 | 0.70795 | 18823 P | 1.065  | 19.02 | 0.22046 | 5216  |
| Cml1          | A_51_P235604 | NM_023160          | camello-like 1                                | 1.166 | 65.79 | 0.64133 | 15758 P | -1.045 | 44.4  | 0.52699 | 8816  |
| Gpc3          | A_52_P23225  | NM_016697          | glypican 3                                    | 1.166 | 77.44 | 0.83252 | 26289 P | 1.113  | 19.02 | 0.48617 | 8395  |
| Il2           | A_51_P114222 | NM_008366          | interleukin 2                                 | 1.166 |       | 0.84744 | 15083 A | 1.125  | 9.71  | 0.16458 | 4288  |
| Nhlrc2        | A_52_P571661 | NM_025811          | NHL repeat containing 2                       | 1.166 | 57.76 | 0.58125 | 12581 P | 1.093  | 13.58 | 0.22108 | 5220  |
| Ppm1f         | A_51_P224564 | NM_176833          | protein phosphatase 1F (PP2C domain con       | 1.166 | 57.76 | 0.58125 | 12592 P | 1.05   | 28.13 | 0.46306 | 8140  |
| Sec23ip       | A_51_P283639 | NM_001029982       | Sec23 interacting protein                     | 1.166 | 75.14 | 0.77781 | 22654 P | 1.017  | 42.43 | 0.83579 | 11494 |
| Spcs1         | A_51_P149775 | NM_026911          | signal peptidase complex subunit 1 homo       | 1.166 | 72.2  | 0.78224 | 17282 M | 1.321  | 1.32  | 0.01781 | 761   |
| Zbtb20        | A_52_P657844 | AK038731           | zinc finger and BTB domain containing 20      | 1.166 | 65.79 | 0.62876 | 14956 P | 1.045  | 25.31 | 0.34641 | 6831  |
| Cetn2         | A_52_P482825 | NM_019405          | centrin 2                                     | 1.165 | 65.79 | 0.63509 | 15483 P | 1.073  | 25.31 | 0.51391 | 8709  |
| H2-Kef6       | A_51_P344407 | NM_013543          | H2-K region expressed gene 6                  | 1.165 | 69.29 | 0.68295 | 17539 P | 1.144  | 8.32  | 0.11205 | 3316  |
| Idh3a         | A_51_P268559 | NM_029573          | isocitrate dehydrogenase 3 (NAD+) alpha       | 1.165 | 61.79 | 0.61831 | 14313 P | 1.131  | 5.75  | 0.04349 | 1632  |
| Irak1         | A_51_P106743 | NM_008363          | interleukin-1 receptor-associated kinase 1    | 1.165 | 61.79 | 0.60384 | 13626 P | 1.313  | 3.46  | 0.09408 | 2982  |
| Mef2c         | A_51_P135802 | NM_025282          | myocyte enhancer factor 2C                    | 1.165 | 57.76 | 0.56348 | 11822 P | 1.075  | 13.58 | 0.16853 | 4361  |
| Mtif2         | A_52_P201446 | NM_133767          | mitochondrial translational initiation fact   | 1.165 | 65.79 | 0.65628 | 16406 P | 1.061  | 22.1  | 0.37996 | 7276  |

|               |              |              |                                           |       |       |         |         |        |       |         |       |
|---------------|--------------|--------------|-------------------------------------------|-------|-------|---------|---------|--------|-------|---------|-------|
| Osgep         | A_51_P310548 | NM_133676    | O-sialoglycoprotein endopeptidase         | 1.165 | 65.79 | 0.66508 | 16826 P | 1.073  | 16.2  | 0.24091 | 5503  |
| Pgrmc1        | A_51_P144581 | NM_016783    | progesterone receptor membrane compo      | 1.165 | 42.28 | 0.50277 | 9774 P  | 1.171  | 5.75  | 0.07811 | 2609  |
| Rps27         | A_51_P511199 | NM_027015    | ribosomal protein S27                     | 1.165 | 45.92 | 0.66359 | 12671 M | 1.109  | 8.32  | 0.06516 | 2293  |
| Sybl1         | A_51_P364421 | NM_011515    | synaptobrevin like 1                      | 1.165 | 53.87 | 0.67248 | 12979 M | -1.045 | 46.3  | 0.70466 | 10352 |
| Taf5          | A_51_P263220 | NM_177342    | TAF5 RNA polymerase II, TATA box binding  | 1.165 | 61.79 | 0.60354 | 13605 P | 1.094  | 9.71  | 0.0963  | 3022  |
| Ube2b         | A_52_P564625 | AK161008     | ubiquitin-conjugating enzyme E2B, RAD6    | 1.165 | 57.76 | 0.58074 | 12523 P | 1.087  | 19.02 | 0.36302 | 7060  |
| Ubx1          | A_51_P391926 | NM_024432    | UBX domain containing 1                   | 1.165 | 53.87 | 0.54927 | 11392 P | -1.275 | 0.51  | 0.00804 | 298   |
| 1110059E24Rik | A_51_P490348 | NM_025423    | RIKEN cDNA 1110059E24 gene                | 1.164 | 49.93 | 0.5246  | 10526 P | -1.089 | 16.2  | 0.1189  | 3462  |
| Cyc1          | A_51_P295610 | NM_025567    | cytochrome c-1                            | 1.164 | 61.79 | 0.59361 | 13126 P | -1.167 | 1.32  | 0.02003 | 855   |
| E130112L23Rik | A_51_P435731 | NM_198249    | RIKEN cDNA E130112L23 gene                | 1.164 | 38.68 | 0.66508 | 13361 M | -1.309 | 0.51  | 0.00619 | 129   |
| Fbxl3         | A_52_P451600 | NM_015822    | F-box and leucine-rich repeat protein 3   | 1.164 | 53.87 | 0.5494  | 11401 P | 1.126  | 8.32  | 0.08375 | 2744  |
| Lctl          | A_51_P336070 | NM_145835    | lactase-like                              | 1.164 | 69.29 | 0.84589 | 21813 M | 1.215  | 1.62  | 0.01291 | 559   |
| Myl9          | A_51_P308298 | BC055439     | myosin, light polypeptide 9, regulatory   | 1.164 | 77.44 | 0.80638 | 24472 P | -1.039 | 45.68 | 0.60313 | 9472  |
| Ncl           | A_52_P429650 | NM_010880    | nucleolin                                 | 1.164 | 57.76 | 0.57081 | 12087 P | 1.075  | 19.02 | 0.36008 | 7019  |
| Papss1        | A_51_P196127 | NM_011863    | 3'-phosphoadenosine 5'-phosphosulfate s   | 1.164 | 57.76 | 0.58125 | 12572 P | 1.173  | 2.53  | 0.0173  | 742   |
| Pon2          | A_51_P280928 | NM_183308    | paraoxonase 2                             | 1.164 | 57.76 | 0.5808  | 12540 P | -1.18  | 4.63  | 0.12227 | 3547  |
| Ppp1r10       | A_52_P258507 | AK004266     | protein phosphatase 1, regulatory subuni  | 1.164 | 57.76 | 0.56283 | 11810 P | 1.03   | 33.49 | 0.58612 | 9305  |
| Ptbp1         | A_52_P234619 | NM_001077363 | polypyrimidine tract binding protein 1    | 1.164 | 65.79 | 0.66333 | 16713 P | 1.138  | 6.98  | 0.06611 | 2323  |
| Rps5          | A_51_P174335 | NM_009095    | ribosomal protein S5                      | 1.164 | 72.2  | 0.79305 | 17721 M | 1.18   | 8.32  | 0.19298 | 4794  |
| Strbp         | A_52_P121525 | NM_009261    | spermatid perinuclear RNA binding prote   | 1.164 | 72.2  | 0.75437 | 21366 P | -1.025 | 47.92 | 0.67257 | 10076 |
| Txndc10       | A_51_P507324 | NM_198295    | thioredoxin domain containing 10          | 1.164 | 61.79 | 0.62401 | 14654 P | 1.001  | 42.43 | 0.99    | 12986 |
| 2810430M08Rik | A_51_P186053 | NM_026041    | ribosomal RNA processing 15 homolog (S    | 1.163 | 61.79 | 0.60961 | 13921 P | 1.097  | 13.58 | 0.25033 | 5648  |
| Acad8         | A_51_P244052 | NM_025862    | acyl-Coenzyme A dehydrogenase family, r   | 1.163 | 65.79 | 0.65713 | 16448 P | 1.02   | 38.4  | 0.67006 | 10044 |
| BC002199      | A_51_P318497 | NM_145964    | cDNA sequence BC002199                    | 1.163 | 53.87 | 0.54821 | 11347 P | 1.194  | 3.01  | 0.02469 | 1020  |
| Bclaf1        | A_52_P18897  | NM_001025393 | BCL2-associated transcription factor 1    | 1.163 | 72.2  | 0.71212 | 19070 P | 1.048  | 30.75 | 0.59726 | 9420  |
| D030022P06Rik | A_52_P419632 | AK154145     | RIKEN cDNA D030022P06 gene                | 1.163 | 75.14 | 0.77107 | 22256 P | -1.032 | 46.85 | 0.67797 | 10122 |
| H13           | A_52_P341161 | BC056977     | histocompatibility 13                     | 1.163 | 69.29 | 0.69849 | 18304 P | 1.071  | 16.2  | 0.22666 | 5303  |
| Mphosph6      | A_51_P453010 | NM_026758    | M phase phosphoprotein 6                  | 1.163 | 72.2  | 0.75269 | 21250 P | 1.184  | 3.82  | 0.04181 | 1578  |
| Pcaf          | A_52_P87955  | NM_020005    | p300/CBP-associated factor                | 1.163 | 61.79 | 0.59402 | 13168 P | 1.013  | 42.43 | 0.7827  | 11019 |
| Ubap2         | A_51_P286411 | NM_026872    | ubiquitin-associated protein 2            | 1.163 | 69.29 | 0.7004  | 18396 P | 1.066  | 19.02 | 0.31065 | 6455  |
| Cox6a1        | A_51_P311540 | NM_007748    | cytochrome c oxidase, subunit VI a, polyp | 1.162 | 53.87 | 0.68383 | 13327 M | -1.068 | 40.63 | 0.47325 | 8230  |
| Racgap1       | A_51_P243750 | NM_012025    | Rac GTPase-activating protein 1           | 1.162 | 61.79 | 0.61013 | 13950 P | 1.072  | 22.1  | 0.37093 | 7182  |
| Usp34         | A_52_P172453 | AK033182     | ubiquitin specific peptidase 34           | 1.162 | 57.76 | 0.57165 | 12103 P | -1.025 | 48.7  | 0.71908 | 10475 |
| Wdr18         | A_51_P317115 | NM_175450    | WD repeat domain 18                       | 1.162 | 61.79 | 0.59305 | 13061 P | -1.087 | 22.1  | 0.19196 | 4771  |
| Acyp1         | A_51_P145735 | NM_025421    | acylphosphatase 1, erythrocyte (common    | 1.161 | 75.14 | 0.78002 | 22744 P | 1.078  | 16.2  | 0.26935 | 5945  |
| Dnajc14       | A_52_P95921  | NM_028873    | Dnaj (Hsp40) homolog, subfamily C, mem    | 1.161 | 69.29 | 0.71034 | 18966 P | 1.099  | 11.33 | 0.15644 | 4153  |
| Gmps          | A_52_P489531 | AK136966     | guanine monphosphate synthetase           | 1.161 | 65.79 | 0.63638 | 15544 P | 1.089  | 9.71  | 0.09771 | 3060  |
| Jarid1a       | A_51_P249689 | AK043170     | jumonji, AT rich interactive domain 1A (R | 1.161 | 72.2  | 0.73001 | 20238 M | -1.099 | 28.13 | 0.29943 | 6306  |
| Limk1         | A_51_P484030 | NM_010717    | LIM-domain containing, protein kinase     | 1.161 | 65.79 | 0.62914 | 15000 P | 1.044  | 30.75 | 0.52026 | 8758  |
| Nr2f2         | A_52_P155713 | AK012573     | nuclear receptor subfamily 2, group F, me | 1.161 | 77.44 | 0.8198  | 25402 P | 1.133  | 13.58 | 0.30779 | 6414  |
| Psm13         | A_52_P50512  | NM_011875    | proteasome (prosome, macropain) 26S su    | 1.161 | 72.2  | 0.7491  | 21035 P | -1.159 | 11.33 | 0.22287 | 5256  |
| Stard3        | A_51_P154973 | NM_021547    | START domain containing 3                 | 1.161 | 72.2  | 0.74715 | 20943 P | -1.254 | 0.56  | 0.01077 | 417   |
| Top2b         | A_52_P183062 | AK052306     | topoisomerase (DNA) II beta               | 1.161 |       | 0.88993 | 16111 A | 1.106  | 9.71  | 0.09505 | 2999  |
| Zfp26         | A_52_P566487 | XM_977451    | zinc finger protein 26                    | 1.161 | 45.92 | 0.58909 | 11746 P | -1.013 | 49.48 | 0.86948 | 11756 |
| 4632413K17Rik | A_51_P382331 | AK014574     | amplified in osteosarcoma                 | 1.16  |       | 0.65262 | 14290 A | 1.098  | 9.71  | 0.11145 | 3308  |
| 4930482L21Rik | A_52_P617272 | AK015611     | RIKEN cDNA 4930482L21 gene                | 1.16  | 65.79 | 0.65572 | 16364 P | 1.074  | 13.58 | 0.16092 | 4229  |
| 9130221D24Rik | A_52_P146403 | NM_029953    | RIKEN cDNA 9130221D24 gene                | 1.16  | 77.44 | 0.83662 | 26863 M | -1.105 | 9.71  | 0.09132 | 2929  |
| Acvr1b        | A_51_P402391 | NM_007395    | activin A receptor, type 1B               | 1.16  |       | 0.7174  | 14233 A | 1.14   | 11.33 | 0.28147 | 6106  |
| Alg2          | A_51_P123060 | NM_019998    | asparagine-linked glycosylation 2 homolo  | 1.16  | 69.29 | 0.7652  | 16676 M | 1.401  | 1.17  | 0.01933 | 813   |
| Atbf1         | A_52_P574618 | NM_007496    | AT motif binding factor 1                 | 1.16  | 69.29 | 0.67252 | 17197 P | 1.058  | 19.02 | 0.25284 | 5693  |
| Gpi1          | A_51_P426886 | NM_008155    | glucose phosphate isomerase 1             | 1.16  | 61.79 | 0.7073  | 14238 M | 1.172  | 2.53  | 0.01625 | 696   |
| Jtb           | A_52_P603976 | NM_206924    | jumping translocation breakpoint          | 1.16  | 65.79 | 0.73827 | 15727 M | -1.055 | 44.4  | 0.62307 | 9648  |
| Mafg          | A_52_P240754 | NM_010756    | v-maf musculoaponeurotic fibrosarcoma     | 1.16  | 72.2  | 0.74163 | 20675 P | 1.135  | 11.33 | 0.24553 | 5575  |



|               |              |              |                                             |       |       |         |         |        |       |         |       |
|---------------|--------------|--------------|---------------------------------------------|-------|-------|---------|---------|--------|-------|---------|-------|
| P4ha1         | A_51_P458067 | NM_011030    | procollagen-proline, 2-oxoglutarate 4-dio   | 1.16  | 72.2  | 0.72493 | 20010 P | 1.002  | 42.43 | 0.97517 | 12787 |
| Zfp9          | A_52_P315910 | AB010325     | zinc finger protein 9                       | 1.16  | 61.79 | 0.59548 | 13262 P | 1.001  | 42.43 | 0.9814  | 12860 |
| 2410004L22Rik | A_51_P249544 | NM_029621    | RIKEN cDNA 2410004L22 gene                  | 1.159 | 75.14 | 0.79711 | 23933 P | 1.061  | 19.02 | 0.2754  | 6031  |
| Adcy4         | A_51_P229911 | NM_080435    | adenylate cyclase 4                         | 1.159 | 77.44 | 0.82276 | 25590 P | -1.015 | 49.48 | 0.8006  | 11179 |
| D5ErtD135e    | A_51_P231364 | AK088165     | DNA segment, Chr 5, ERATO Doi 135, exp      | 1.159 | 42.28 | 0.51932 | 10319 P | -1.078 | 25.31 | 0.1683  | 4356  |
| Gpiap1        | A_52_P127459 | AK133891     | cell cycle associated protein 1             | 1.159 | 65.79 | 0.64935 | 16074 P | 1.044  | 28.13 | 0.44677 | 7978  |
| Mrpl52        | A_52_P315111 | NM_026851    | mitochondrial ribosomal protein L52         | 1.159 | 61.79 | 0.6241  | 14660 P | -1.065 | 25.31 | 0.15736 | 4170  |
| Pxn           | A_52_P317416 | AK084243     | paxillin                                    | 1.159 |       | 0.93084 | 13513 A | -1.035 | 45.05 | 0.52813 | 8821  |
| Senp7         | A_52_P88722  | NM_025483    | SUMO1/sentrin specific peptidase 7          | 1.159 | 65.79 | 0.65802 | 16497 P | 1.058  | 19.02 | 0.25617 | 5746  |
| Spata5        | A_51_P192429 | NM_021343    | spermatogenesis associated 5                | 1.159 | 49.93 | 0.54172 | 11067 P | 1.038  | 28.13 | 0.37715 | 7243  |
| Spon1         | A_51_P151902 | NM_145584    | spondin 1, (f-spondin) extracellular matrix | 1.159 | 75.14 | 0.7629  | 21810 P | 1.038  | 28.13 | 0.39055 | 7401  |
| 2610204L23Rik | A_52_P214416 | AK162160     | RIKEN cDNA 2610204L23 gene                  | 1.158 | 65.79 | 0.65776 | 16486 P | 1.123  | 13.58 | 0.34767 | 6844  |
| Apcs          | A_51_P354165 | NM_011318    | serum amyloid P-component                   | 1.158 | 61.79 | 0.61855 | 14355 P | -1.028 | 47.92 | 0.70508 | 10363 |
| Atp6v0e       | A_51_P336874 | NM_025272    | ATPase, H+ transporting, lysosomal VO su    | 1.158 | 72.2  | 0.77427 | 17010 M | 1.042  | 36.07 | 0.74823 | 10775 |
| AU040829      | A_51_P254019 | AK053220     | expressed sequence AU040829                 | 1.158 |       | 0.81213 | 16064 A | 1.125  | 5.75  | 0.04689 | 1746  |
| Cse1l         | A_52_P470518 | NM_023565    | chromosome segregation 1-like (S. cerevisi  | 1.158 | 77.44 | 0.82564 | 25727 P | -1.106 | 13.58 | 0.1217  | 3538  |
| Plekjh1       | A_51_P196509 | NM_023900    | pleckstrin homology domain containing, f    | 1.158 | 57.76 | 0.57363 | 12179 P | 1.054  | 25.31 | 0.43881 | 7912  |
| Rpl11         | A_51_P394524 | NM_025919    | ribosomal protein L11                       | 1.158 | 69.29 | 0.77288 | 16962 M | 1.204  | 2.53  | 0.02026 | 866   |
| Seh1l         | A_52_P352967 | BC027244     | SEH1-like (S. cerevisiae)                   | 1.158 | 77.44 | 0.83513 | 26707 P | 1.104  | 13.58 | 0.24813 | 5619  |
| Slc25a25      | A_51_P193176 | NM_146118    | solute carrier family 25 (mitochondrial ca  | 1.158 | 77.44 | 0.83461 | 26667 P | 1.001  | 42.43 | 0.98717 | 12950 |
| Slc6a9        | A_51_P351872 | NM_008135    | solute carrier family 6 (neurotransmitter t | 1.158 | 75.14 | 0.76651 | 22013 P | -1.037 | 48.7  | 0.80857 | 11273 |
| Snrpd2        | A_51_P475279 | NM_026943    | small nuclear ribonucleoprotein D2          | 1.158 | 75.14 | 0.76918 | 22161 P | 1.067  | 19.02 | 0.27879 | 6072  |
| 1110059P08Rik | A_52_P73374  | AK085518     | Vps20-associated 1 homolog (S. cerevisia    | 1.157 | 61.79 | 0.60208 | 13529 P | 1.078  | 16.2  | 0.24886 | 5630  |
| Adprh         | A_52_P289022 | AF244347     | ADP-ribosylarginine hydrolase               | 1.157 | 75.14 | 0.79472 | 23801 P | 1.076  | 19.02 | 0.27646 | 6050  |
| AI314976      | A_52_P505584 | NM_207219    | expressed sequence AI314976                 | 1.157 | 72.2  | 0.74637 | 20902 P | 1.128  | 6.98  | 0.0689  | 2374  |
| Arl1          | A_51_P195393 | NM_025859    | ADP-ribosylation factor-like 1              | 1.157 | 57.76 | 0.64752 | 13050 M | 1.075  | 22.1  | 0.44278 | 7944  |
| C330007P06Rik | A_52_P137086 | AK021190     | RIKEN cDNA C330007P06 gene                  | 1.157 | 72.2  | 0.74317 | 20728 P | -1.038 | 45.05 | 0.53126 | 8844  |
| D12ErtD647e   | A_52_P86693  | NM_026790    | DNA segment, Chr 12, ERATO Doi 647, exp     | 1.157 | 69.29 | 0.67764 | 17358 P | 1.026  | 40.63 | 0.85305 | 11618 |
| Lilrb4        | A_51_P241457 | NM_013532    | leukocyte immunoglobulin-like receptor, s   | 1.157 | 65.79 | 0.65991 | 16585 P | 1.011  | 42.43 | 0.82428 | 11402 |
| Lztr1         | A_52_P75985  | NM_025808    | leucine-zipper-like transcriptional regulat | 1.157 | 53.87 | 0.56567 | 11890 P | 1.177  | 3.46  | 0.02595 | 1075  |
| Prkce         | A_51_P352782 | AK017901     | protein kinase C, epsilon                   | 1.157 | 72.2  | 0.79485 | 17808 M | 1.067  | 13.58 | 0.1484  | 4018  |
| Pscd4         | A_51_P231398 | NM_028195    | pleckstrin homology, Sec7 and coiled/coil   | 1.157 | 77.44 | 0.83461 | 26630 P | -1.032 | 45.05 | 0.47319 | 8228  |
| Tmepai        | A_51_P449777 | NM_022995    | transmembrane, prostate androgen induc      | 1.157 | 77.44 | 0.81643 | 25177 M | 1.23   | 6.98  | 0.18739 | 4690  |
| Tusc2         | A_52_P123354 | NM_019742    | tumor suppressor candidate 2                | 1.157 | 65.79 | 0.65628 | 16403 P | -1.051 | 42.43 | 0.36472 | 7088  |
| Capza2        | A_51_P496845 | NM_007604    | capping protein (actin filament) muscle Z-  | 1.156 | 72.2  | 0.73001 | 20250 P | 1.111  | 11.33 | 0.19502 | 4815  |
| Mfn2          | A_51_P266774 | NM_133201    | mitofusin 2                                 | 1.156 | 75.14 | 0.79372 | 23735 P | 1.099  | 16.2  | 0.38172 | 7303  |
| Mrpl36        | A_51_P450123 | NM_053163    | mitochondrial ribosomal protein L36         | 1.156 | 61.79 | 0.61717 | 14244 P | -1.218 | 0.75  | 0.012   | 484   |
| Msl31         | A_51_P332481 | NM_010832    | male-specific lethal-3 homolog 1 (Drosop    | 1.156 | 61.79 | 0.59629 | 13312 P | 1.075  | 19.02 | 0.32475 | 6616  |
| Rin3          | A_51_P111562 | NM_177620    | Ras and Rab interactor 3                    | 1.156 | 53.87 | 0.5658  | 11892 P | -1.162 | 1.58  | 0.02361 | 991   |
| Rnf149        | A_52_P128283 | NM_001033135 | ring finger protein 149                     | 1.156 | 57.76 | 0.58539 | 12804 P | 1.162  | 3.46  | 0.02469 | 1019  |
| Rpl9          | A_51_P301734 | NM_011292    | ribosomal protein L9                        | 1.156 | 53.87 | 0.69103 | 13601 M | 1.048  | 30.75 | 0.57494 | 9227  |
| Slc20a1       | A_51_P408631 | NM_015747    | solute carrier family 20, member 1          | 1.156 | 77.44 | 0.82861 | 25929 P | 1.04   | 30.75 | 0.49834 | 8566  |
| 1700034H14Rik | A_51_P395842 | NM_025969    | RIKEN cDNA 1700034H14 gene                  | 1.155 | 77.44 | 0.81371 | 24956 P | 1.046  | 28.13 | 0.4813  | 8322  |
| Fancl         | A_51_P127934 | NM_025923    | Fanconi anemia, complementation group       | 1.155 | 65.79 | 0.66519 | 16836 P | 1.059  | 22.1  | 0.31065 | 6458  |
| Mkrn1         | A_52_P642207 | NM_018810    | makorin, ring finger protein, 1             | 1.155 | 49.93 | 0.54443 | 11173 P | -1.017 | 49.48 | 0.74205 | 10702 |
| 1300017J02Rik | A_51_P249274 | NM_027918    | RIKEN cDNA 1300017J02 gene                  | 1.154 | 57.76 | 0.57971 | 12496 P | -1.11  | 9.71  | 0.10282 | 3167  |
| Amotl1        | A_51_P210708 | XM_976419    | angiominin-like 1                           | 1.154 | 75.14 | 0.79115 | 23514 P | -1.004 | 49.48 | 0.95631 | 12632 |
| Ccs           | A_51_P193536 | NM_016892    | copper chaperone for superoxide dismuta     | 1.154 | 69.29 | 0.69665 | 18208 P | -1.012 | 49.48 | 0.79418 | 11129 |
| Eef1a2        | A_51_P485862 | NM_007906    | eukaryotic translation elongation factor 1  | 1.154 | 75.14 | 0.67482 | 16457 M | 1.068  | 16.2  | 0.17956 | 4566  |
| Mapk8ip3      | A_51_P264388 | NM_013931    | mitogen-activated protein kinase 8 intera   | 1.154 | 69.29 | 0.70795 | 18839 P | 1.056  | 22.1  | 0.31851 | 6560  |
| MbtD1         | A_51_P360963 | NM_134012    | mbt domain containing 1                     | 1.154 | 57.76 | 0.57961 | 12470 P | 1.053  | 25.31 | 0.35881 | 6992  |
| Rac3          | A_51_P455946 | NM_133223    | RAS-related C3 botulinum substrate 3        | 1.154 | 61.79 | 0.60024 | 13456 P | 1.073  | 13.58 | 0.16545 | 4303  |
| Trpc2         | A_52_P34381  | NM_011644    | transient receptor potential cation chann   | 1.154 | 69.29 | 0.70666 | 17794 P | 1.135  | 5.75  | 0.05313 | 1961  |

|               |              |              |                                              |       |       |         |         |        |       |         |       |
|---------------|--------------|--------------|----------------------------------------------|-------|-------|---------|---------|--------|-------|---------|-------|
| Abhd10        | A_52_P259530 | NM_172511    | abhydrolase domain containing 10             | 1.153 | 69.29 | 0.68339 | 17571 P | 1.127  | 9.71  | 0.17517 | 4483  |
| Hpca          | A_52_P287246 | NM_010471    | hippocalcin                                  | 1.153 |       | 0.81874 | 16353 A | 1.031  | 33.49 | 0.51445 | 8716  |
| Mrps15        | A_51_P333099 | NM_025544    | mitochondrial ribosomal protein S15          | 1.153 | 69.29 | 0.69529 | 18162 P | 1.009  | 42.43 | 0.88436 | 11910 |
| Slc29a1       | A_51_P289836 | NM_022880    | solute carrier family 29 (nucleoside transp  | 1.153 | 65.79 | 0.63878 | 15649 P | 1.065  | 16.2  | 0.18159 | 4606  |
| St3gal2       | A_52_P408530 | NM_178048    | ST3 beta-galactoside alpha-2,3-sialyltrans   | 1.153 | 69.29 | 0.67154 | 17114 P | -1.12  | 4.63  | 0.05188 | 1905  |
| 2310047H23Rik | A_52_P465964 | AK046071     | RIKEN cDNA 2310047H23 gene                   | 1.152 |       | 0.82089 | 16425 A | -1.094 | 36.07 | 0.44517 | 7963  |
| 3110003A17Rik | A_51_P214679 | BC098509     | RIKEN cDNA 3110003A17 gene                   | 1.152 | 49.93 | 0.54934 | 11395 P | 1.12   | 11.33 | 0.23607 | 5435  |
| Ctps          | A_51_P251357 | NM_016748    | cytidine 5'-triphosphate synthase            | 1.152 | 65.79 | 0.74041 | 15787 M | 1.02   | 38.4  | 0.6554  | 9922  |
| E130103117Rik | A_52_P674196 | NM_181316    | Bardet-Biedl syndrome 9                      | 1.152 | 72.2  | 0.71027 | 18958 P | 1.079  | 11.33 | 0.12478 | 3597  |
| Ganab         | A_52_P594215 | NM_008060    | alpha glucosidase 2 alpha neutral subunit    | 1.152 | 65.79 | 0.65943 | 16557 P | 1.149  | 4.63  | 0.03814 | 1442  |
| Gnl3l         | A_52_P101416 | NM_198110    | guanine nucleotide binding protein-like 3    | 1.152 | 57.76 | 0.64388 | 14935 P | -1.044 | 43.75 | 0.48306 | 8362  |
| Mitf          | A_52_P100140 | NM_008601    | microphthalmia-associated transcription      | 1.152 | 77.44 | 0.80242 | 24170 M | -1.274 | 2.04  | 0.09627 | 3020  |
| Tyms          | A_52_P292651 | NM_021288    | thymidylate synthase                         | 1.152 | 69.29 | 0.70619 | 18716 P | -1.068 | 25.31 | 0.15043 | 4043  |
| 2410003K15Rik | A_52_P343853 | AK031878     | RIKEN cDNA 2410003K15 gene                   | 1.151 | 77.44 | 0.72064 | 18446 P | 1.047  | 30.75 | 0.60313 | 9475  |
| 6230416J20Rik | A_51_P288026 | NM_173400    | RIKEN cDNA 6230416J20 gene                   | 1.151 | 65.79 | 0.65402 | 16313 P | -1.111 | 9.71  | 0.0911  | 2923  |
| Gcsh          | A_52_P390625 | NM_026572    | glycine cleavage system protein H (amino     | 1.151 | 72.2  | 0.74353 | 20757 P | 1.179  | 3.46  | 0.02935 | 1178  |
| Mbd2          | A_51_P256337 | AF072244     | methyl-CpG binding domain protein 2          | 1.151 | 65.79 | 0.64638 | 15940 P | 1.141  | 5.75  | 0.05867 | 2097  |
| Mcm10         | A_51_P212682 | NM_027290    | minichromosome maintenance deficient         | 1.151 | 65.79 | 0.69547 | 17297 M | -1.086 | 28.13 | 0.27701 | 6055  |
| Tbc1d15       | A_52_P120904 | NM_025706    | TBC1 domain family, member 15                | 1.151 | 65.79 | 0.63827 | 15632 P | 1.064  | 22.1  | 0.37451 | 7217  |
| Tfb2m         | A_52_P69325  | NM_008249    | transcription factor B2, mitochondrial       | 1.151 | 69.29 | 0.69465 | 18145 P | 1.082  | 13.58 | 0.16225 | 4261  |
| Yme1l1        | A_52_P575874 | AK163649     | YME1-like 1 (S. cerevisiae)                  | 1.151 | 69.29 | 0.70134 | 18456 P | 1.091  | 16.2  | 0.31396 | 6512  |
| 4932416N17Rik | A_52_P558609 | NM_177562    | RIKEN cDNA 4932416N17 gene                   | 1.15  | 75.14 | 0.77632 | 22546 P | -1.241 | 0.66  | 0.01176 | 471   |
| Acadm         | A_51_P319879 | NM_007382    | acyl-Coenzyme A dehydrogenase, medium        | 1.15  | 61.79 | 0.61519 | 14168 P | 1.201  | 11.33 | 0.37093 | 7184  |
| Dck           | A_52_P602719 | NM_007832    | deoxycytidine kinase                         | 1.15  | 79.26 | 0.86863 | 28804 P | 1.801  | 0     | 0.00584 | 8     |
| Efna5         | A_51_P218009 | NM_010109    | ephrin A5                                    | 1.15  | 75.14 | 0.81815 | 23883 M | 1.081  | 13.58 | 0.1951  | 4819  |
| Fau           | A_51_P178761 | NM_007990    | Finkel-Biskis-Reilly murine sarcoma virus    | 1.15  | 61.79 | 0.73575 | 15664 M | 1.03   | 36.07 | 0.65794 | 9954  |
| Rbms1         | A_52_P189038 | AK161102     | RNA binding motif, single stranded intera    | 1.15  | 69.29 | 0.68448 | 17649 P | 1.006  | 42.43 | 0.94037 | 12483 |
| Spock2        | A_52_P221756 | NM_052994    | sparc/osteonectin, cwcv and kazal-like do    | 1.15  | 77.44 | 0.80292 | 24246 P | -1.01  | 49.48 | 0.93149 | 12401 |
| Stam          | A_51_P242663 | NM_011484    | signal transducing adaptor molecule (SH3     | 1.15  | 65.79 | 0.66728 | 16911 P | 1.235  | 2.53  | 0.03237 | 1268  |
| Tmem33        | A_51_P400527 | NM_028975    | transmembrane protein 33                     | 1.15  | 65.79 | 0.65628 | 16402 P | 1.038  | 33.49 | 0.5827  | 9285  |
| Trim27        | A_52_P601446 | AK049314     | tripartite motif protein 27                  | 1.15  | 79.26 | 0.86518 | 27008 M | 1.044  | 28.13 | 0.4855  | 8390  |
| Uqcr          | A_51_P300143 | NM_025650    | ubiquinol-cytochrome c reductase (6.4kD      | 1.15  | 65.79 | 0.63553 | 15505 P | 1.033  | 33.49 | 0.53762 | 8916  |
| 9430040K09Rik | A_52_P86165  | AK020461     | RIKEN cDNA 9430040K09 gene                   | 1.149 | 65.79 | 0.64292 | 15848 P | -1.287 | 0.51  | 0.00619 | 122   |
| Cd28          | A_52_P162967 | NM_007642    | CD28 antigen                                 | 1.149 |       | 0.82443 | 16564 A | -1.147 | 16.2  | 0.28314 | 6120  |
| Cdc91l1       | A_52_P222709 | NM_001004721 | CDC91 cell division cycle 91-like 1 (S. cere | 1.149 | 69.29 | 0.66861 | 16974 P | 1.048  | 30.75 | 0.58282 | 9290  |
| Crispld1      | A_51_P249749 | NM_031402    | cysteine-rich secretory protein LCCL dom     | 1.149 | 81.02 | 0.9061  | 31516 P | 1.019  | 38.4  | 0.70459 | 10351 |
| Dhfr          | A_51_P461444 | L26316       | dihydrofolate reductase                      | 1.149 | 69.29 | 0.67216 | 17156 P | 1.048  | 22.1  | 0.26972 | 5949  |
| Fkbp4         | A_51_P185175 | NM_010219    | FK506 binding protein 4                      | 1.149 | 65.79 | 0.63295 | 15373 P | 1.287  | 6.98  | 0.22527 | 5276  |
| Kifap3        | A_52_P363301 | NM_010629    | kinesin-associated protein 3                 | 1.149 | 75.14 | 0.77995 | 22735 P | -1.057 | 40.63 | 0.36238 | 7053  |
| Nipa2         | A_51_P197354 | NM_023647    | non imprinted in Prader-Willi/Angelman s     | 1.149 | 69.29 | 0.6857  | 17691 P | -1.181 | 1.18  | 0.02042 | 876   |
| Pea15         | A_51_P411253 | NM_011063    | phosphoprotein enriched in astrocytes 15     | 1.149 | 75.14 | 0.7554  | 21430 P | 1.056  | 28.13 | 0.49697 | 8541  |
| Peg10         | A_52_P377723 | NM_001040611 | paternally expressed 10                      | 1.149 | 81.02 | 0.8984  | 30853 P | 1.203  | 2.53  | 0.01679 | 725   |
| St3gal3       | A_52_P155692 | NM_009176    | ST3 beta-galactoside alpha-2,3-sialyltrans   | 1.149 | 65.79 | 0.64844 | 16032 P | -1.011 | 49.48 | 0.92414 | 12335 |
| Aldh2         | A_52_P13109  | AK163452     | aldehyde dehydrogenase 2, mitochondrial      | 1.148 | 75.14 | 0.77957 | 22724 P | 1.046  | 25.31 | 0.3105  | 6452  |
| Gfra1         | A_52_P311022 | NM_010279    | glial cell line derived neurotrophic factor  | 1.148 | 81.02 | 0.89461 | 30633 P | 1.053  | 22.1  | 0.31972 | 6565  |
| Grcc10        | A_51_P320114 | NM_013535    | gene rich cluster, C10 gene                  | 1.148 | 61.79 | 0.72733 | 15356 M | -1.093 | 16.2  | 0.13414 | 3751  |
| Mrps26        | A_52_P542958 | NM_207207    | mitochondrial ribosomal protein S26          | 1.148 | 77.44 | 0.83423 | 26448 P | -1.196 | 0.75  | 0.01294 | 563   |
| Slc41a1       | A_51_P393726 | NM_173865    | solute carrier family 41, member 1           | 1.148 | 72.2  | 0.74379 | 20761 P | 1.037  | 30.75 | 0.52265 | 8776  |
| Ank1          | A_51_P269375 | NM_031158    | ankyrin 1, erythroid                         | 1.147 | 83.36 | 0.90814 | 29696 M | -1.469 | 0.51  | 0.00584 | 51    |
| Arl3          | A_51_P107265 | NM_019718    | ADP-ribosylation factor-like 3               | 1.147 | 61.79 | 0.62413 | 14662 P | -1.056 | 36.07 | 0.2801  | 6095  |
| Cct3          | A_52_P685666 | NM_009836    | chaperonin subunit 3 (gamma)                 | 1.147 | 79.26 | 0.84866 | 27658 P | -1.02  | 49.48 | 0.78083 | 11001 |
| Cdgap         | A_52_P400999 | NM_020260    | Cdc42 GTPase-activating protein              | 1.147 | 72.2  | 0.7216  | 19724 P | 1.057  | 22.1  | 0.29373 | 6266  |
| Cul2          | A_52_P483544 | NM_029402    | cullin 2                                     | 1.147 | 61.79 | 0.61522 | 14174 P | 1.004  | 42.43 | 0.94174 | 12498 |

|               |               |                   |                                             |       |       |         |         |        |       |         |       |
|---------------|---------------|-------------------|---------------------------------------------|-------|-------|---------|---------|--------|-------|---------|-------|
| D19Ertd386e   | A_52_P486482  | NM_177464         | DNA segment, Chr 19, ERATO Doi 386, ex      | 1.147 | 61.79 | 0.62449 | 14672 P | 1.077  | 16.2  | 0.25423 | 5727  |
| Ehd2          | A_52_P340595  | NM_153068         | EH-domain containing 2                      | 1.147 | 49.93 | 0.80622 | 17525 M | 1.054  | 28.13 | 0.53051 | 8837  |
| Imp4          | A_51_P322465  | NM_178601         | IMP4, U3 small nucleolar ribonucleoprote    | 1.147 | 57.76 | 0.58727 | 12882 P | 1.022  | 38.4  | 0.68236 | 10156 |
| Sypl          | A_51_P129299  | NM_013635         | synaptophysin-like protein                  | 1.147 | 69.29 | 0.66951 | 17002 P | 1.174  | 6.98  | 0.1097  | 3258  |
| Zkscan1       | A_52_P322364  | NM_133906         | zinc finger with KRAB and SCAN domains      | 1.147 | 65.79 | 0.72069 | 18454 P | -1.067 | 25.31 | 0.16548 | 4305  |
| 2610005L07Rik | A_52_P7105    | NM_001033456      | RIKEN cDNA 6820431F20 gene                  | 1.146 | 49.93 | 0.56391 | 11837 P | 1.093  | 13.58 | 0.19606 | 4838  |
| 2700085E05Rik | A_51_P154196  | NM_026029         | glyoxalase domain containing 4              | 1.146 | 75.14 | 0.77055 | 22221 P | -1.052 | 40.63 | 0.36387 | 7070  |
| Adcy2         | A_51_P337523  | NM_153534         | adenylate cyclase 2                         | 1.146 | 82.34 | 0.90089 | 29085 M | 1.081  | 11.33 | 0.12364 | 3570  |
| Anp32b        | A_51_P388432  | NM_130889         | acidic nuclear phosphoprotein 32 family,    | 1.146 | 65.79 | 0.64388 | 15893 P | 1.09   | 22.1  | 0.49451 | 8496  |
| Ap3b2         | A_51_P486681  | NM_021492         | adaptor-related protein complex 3, beta 2   | 1.146 | 75.14 | 0.76834 | 22137 P | 1.148  | 9.71  | 0.21777 | 5166  |
| Bcl7c         | A_52_P368262  | AK038789          | B-cell CLL/lymphoma 7C                      | 1.146 | 75.14 | 0.76552 | 21942 P | 1      | 42.43 | 0.99729 | 13033 |
| Lrrn3         | A_52_P146719  | NM_010733         | leucine rich repeat protein 3, neuronal     | 1.146 | 77.44 | 0.82767 | 25869 P | 1.079  | 11.33 | 0.11878 | 3458  |
| Pld3          | A_52_P614336  | NM_011116         | phospholipase D family, member 3            | 1.146 | 65.79 | 0.66067 | 16594 P | 1.001  | 42.43 | 0.98171 | 12864 |
| Ppia          | A_52_P265542  | NM_008907         | peptidylprolyl isomerase A                  | 1.146 | 72.2  | 0.79875 | 17951 M | 1.059  | 28.13 | 0.52026 | 8755  |
| Rps13         | A_51_P327469  | NM_026533         | ribosomal protein S13                       | 1.146 | 53.87 | 0.71537 | 14599 M | 1.123  | 9.71  | 0.13386 | 3738  |
| 6230427J02Rik | A_51_P248857  | NM_026597         | RIKEN cDNA 6230427J02 gene                  | 1.145 | 75.14 | 0.71948 | 17344 M | 1.005  | 42.43 | 0.94592 | 12551 |
| Anks1         | A_51_P141932  | NM_181413         | ankyrin repeat and SAM domain containi      | 1.145 | 77.44 | 0.82821 | 25900 P | -1.231 | 0.75  | 0.01444 | 608   |
| Eif4a1        | A_51_P113527  | NM_144958         | eukaryotic translation initiation factor 4A | 1.145 | 77.44 | 0.83401 | 19634 M | 1.022  | 40.63 | 0.82285 | 11394 |
| Epor          | A_51_P435339  | NM_010149         | erythropoietin receptor                     | 1.145 | 75.14 | 0.68383 | 16789 M | 1.143  | 5.75  | 0.05435 | 1985  |
| Fkbp3         | A_52_P531175  | NM_013902         | FK506 binding protein 3                     | 1.145 | 61.79 | 0.62794 | 14847 P | -1.125 | 5.75  | 0.0694  | 2383  |
| Gpr135        | A_52_P275678  | NM_181752         | G protein-coupled receptor 135              | 1.145 | 72.2  | 0.75046 | 21097 P | 1.072  | 16.2  | 0.19727 | 4855  |
| Hoxb1         | A_51_P485014  | NM_008266         | homeo box B1                                | 1.145 |       | 0.93951 | 13728 A | 1.056  | 19.02 | 0.24127 | 5517  |
| Hspb7         | A_51_P346445  | NM_013868         | heat shock protein family, member 7 (car    | 1.145 | 49.93 | 0.58738 | 12289 M | 1.148  | 5.75  | 0.07034 | 2404  |
| Irf6          | A_52_P47598   | AK087631          | interferon regulatory factor 6              | 1.145 | 72.2  | 0.72951 | 20208 M | 1.067  | 13.58 | 0.16181 | 4250  |
| Mtch2         | A_51_P135394  | NM_019758         | mitochondrial carrier homolog 2 (C. eleg    | 1.145 | 75.14 | 0.77781 | 22647 P | 1.127  | 9.71  | 0.13456 | 3754  |
| Nedd1         | A_51_P315634  | NM_008682         | neural precursor cell expressed, developr   | 1.145 | 72.2  | 0.74301 | 20717 P | -1.052 | 43.75 | 0.51006 | 8674  |
| Phr1          | A_51_P498670  | AK079289          | pam, highwire, rpm 1                        | 1.145 | 65.79 | 0.65228 | 16181 P | 1.054  | 28.13 | 0.4907  | 8449  |
| Recc1         | A_51_P406638  | NM_011258         | replication factor C (activator 1) 1        | 1.145 | 57.76 | 0.59026 | 12971 P | -1.046 | 40.63 | 0.31668 | 6545  |
| Sdf4          | A_51_P213706  | NM_011341         | stromal cell derived factor 4               | 1.145 | 75.14 | 0.79    | 23458 P | -1.009 | 49.48 | 0.9157  | 12223 |
| Trim2         | A_51_P196596  | NM_030706         | tripartite motif protein 2                  | 1.145 | 49.93 | 0.56391 | 11835 P | 1.124  | 6.98  | 0.05052 | 1867  |
| Ywhab         | A_52_P112958  | NM_018753         | tyrosine 3-monooxygenase/tryptophan 5-      | 1.145 | 57.76 | 0.59453 | 13223 P | 1.237  | 1.32  | 0.00985 | 369   |
| 0910001L09Rik | A_52_P316405  | ENSMUST0000062067 | RIKEN cDNA 0910001L09 gene                  | 1.144 | 72.2  | 0.72707 | 20057 P | 1.058  | 19.02 | 0.24401 | 5565  |
| 2010107E04Rik | A_51_P128287  | NM_027360         | RIKEN cDNA 2010107E04 gene                  | 1.144 | 61.79 | 0.73835 | 15735 M | 1.12   | 13.58 | 0.33379 | 6724  |
| Bcs1l         | A_52_P104782  | NM_025784         | BCS1-like (yeast)                           | 1.144 | 69.29 | 0.70386 | 18624 P | 1.065  | 16.2  | 0.18469 | 4648  |
| Cul5          | A_52_P268378  | NM_027807         | cullin 5                                    | 1.144 | 65.79 | 0.66247 | 16688 P | -1.065 | 40.63 | 0.43397 | 7888  |
| F8a           | A_51_P459679  | NM_007978         | factor 8-associated gene A                  | 1.144 | 72.2  | 0.73591 | 20487 P | 1.064  | 16.2  | 0.20602 | 4985  |
| Fen1          | A_52_P502684  | NM_007999         | flap structure specific endonuclease 1      | 1.144 | 72.2  | 0.72464 | 19984 P | -1.15  | 4.63  | 0.07528 | 2540  |
| Fmo5          | A_52_P1147453 | AK137645          | flavin containing monooxygenase 5           | 1.144 |       | 0.88794 | 16392 A | 1.106  | 13.58 | 0.21864 | 5181  |
| Git2          | A_52_P467588  | NM_019834         | G protein-coupled receptor kinase-intera    | 1.144 | 77.44 | 0.81227 | 24835 P | -1.07  | 40.63 | 0.44425 | 7957  |
| Hbb-y         | A_51_P350058  | NM_008221         | hemoglobin Y, beta-like embryonic chain     | 1.144 | 82.34 | 0.85442 | 26217 M | 1.053  | 19.02 | 0.24252 | 5533  |
| Kpna2         | A_51_P474643  | NM_010655         | karyopherin (importin) alpha 2              | 1.144 | 72.2  | 0.73067 | 20300 P | -1.084 | 25.31 | 0.18959 | 4715  |
| Napg          | A_51_P170008  | NM_028017         | N-ethylmaleimide sensitive fusion protei    | 1.144 | 53.87 | 0.57953 | 12451 P | 1.132  | 8.32  | 0.08963 | 2882  |
| Pbef1         | A_51_P387235  | NM_021524         | pre-B-cell colony-enhancing factor 1        | 1.144 | 75.14 | 0.78665 | 23176 P | -1.017 | 49.48 | 0.92783 | 12370 |
| Psmb1         | A_51_P367162  | NM_011185         | proteasome (prosome, macropain) subun       | 1.144 | 72.2  | 0.73717 | 20528 P | 1.022  | 38.4  | 0.7132  | 10430 |
| Rpa2          | A_51_P234308  | NM_011284         | replication protein A2                      | 1.144 | 69.29 | 0.69975 | 18367 P | 1.12   | 8.32  | 0.07728 | 2582  |
| Rps12         | A_51_P349435  | NM_011295         | ribosomal protein S12                       | 1.144 | 82.34 | 0.92744 | 23954 M | 1.03   | 40.63 | 0.82212 | 11381 |
| Tcf12         | A_52_P20048   | M97635            | transcription factor 12                     | 1.144 | 61.79 | 0.62638 | 14747 P | -1.134 | 3.01  | 0.03757 | 1432  |
| Tpi1          | A_51_P433824  | NM_009415         | triosephosphate isomerase 1                 | 1.144 | 69.29 | 0.67248 | 17182 P | 1.027  | 36.07 | 0.67763 | 10113 |
| Trappc2       | A_51_P102631  | NM_025432         | trafficking protein particle complex 2      | 1.144 | 72.2  | 0.71976 | 19499 P | 1.03   | 38.4  | 0.75753 | 10847 |
| Fbxl5         | A_52_P39533   | NM_178729         | F-box and leucine-rich repeat protein 5     | 1.143 | 79.26 | 0.8375  | 26894 P | 1.027  | 38.4  | 0.77854 | 10972 |
| Matr3         | A_51_P156348  | NM_010771         | matrin 3                                    | 1.143 | 69.29 | 0.70255 | 18543 P | 1.12   | 13.58 | 0.31369 | 6502  |
| Mthfr         | A_52_P413947  | NM_010840         | 5,10-methylenetetrahydrofolate reductas     | 1.143 | 65.79 | 0.64819 | 16014 P | 1.056  | 22.1  | 0.29093 | 6218  |
| Pigx          | A_51_P399217  | NM_024464         | phosphatidylinositol glycan anchor biosyr   | 1.143 | 75.14 | 0.77512 | 22508 P | -1.126 | 5.75  | 0.07277 | 2470  |

|               |               |              |                                              |       |       |         |         |        |       |         |       |
|---------------|---------------|--------------|----------------------------------------------|-------|-------|---------|---------|--------|-------|---------|-------|
| Pkp2          | A_51_P225427  | NM_026163    | plakophilin 2                                | 1.143 | 57.76 | 0.60291 | 13584 P | -1.146 | 1.62  | 0.02493 | 1030  |
| Prkar1a       | A_51_P294095  | NM_021880    | protein kinase, cAMP dependent regulato      | 1.143 | 77.44 | 0.84088 | 20113 M | 1.546  | 0.24  | 0.01141 | 457   |
| Rps23         | A_51_P376165  | NM_024175    | ribosomal protein S23                        | 1.143 | 79.26 | 0.8594  | 20786 M | 1.126  | 9.71  | 0.14327 | 3907  |
| 4933437K13Rik | A_51_P328150  | NM_028964    | RIKEN cDNA 4933437K13 gene                   | 1.142 | 69.29 | 0.70407 | 16747 M | 1.025  | 33.49 | 0.55241 | 9049  |
| 6430527G18Rik | A_51_P244577  | NM_145836    | RIKEN cDNA 6430527G18 gene                   | 1.142 | 72.2  | 0.74725 | 20952 P | 1.339  | 1.62  | 0.03681 | 1406  |
| 6820401H01Rik | A_52_P641414  | AK039998     | RIKEN cDNA 6820401H01 gene                   | 1.142 | 61.79 | 0.62003 | 14457 P | -1.135 | 8.32  | 0.11939 | 3480  |
| Calm3         | A_51_P384499  | NM_007590    | calmodulin 3                                 | 1.142 | 65.79 | 0.64092 | 15722 P | 1.149  | 6.98  | 0.0993  | 3092  |
| Hand2         | A_51_P147850  | NM_010402    | heart and neural crest derivatives express   | 1.142 | 79.26 | 0.85062 | 27757 P | 1.238  | 2.53  | 0.0291  | 1173  |
| Kptn          | A_52_P308477  | NM_133727    | kaptin                                       | 1.142 | 75.14 | 0.78499 | 23077 P | -1.022 | 48.39 | 0.6878  | 10219 |
| Pex16         | A_51_P395164  | NM_145122    | peroxisome biogenesis factor 16              | 1.142 | 75.14 | 0.79222 | 23609 P | -1.261 | 0.51  | 0.00901 | 329   |
| Sulf2         | A_51_P133229  | NM_028072    | sulfatase 2                                  | 1.142 | 53.87 | 0.57553 | 12268 P | 1.045  | 25.31 | 0.35396 | 6937  |
| Tex9          | A_52_P112864  | NM_009359    | testis expressed gene 9                      | 1.142 | 81.02 | 0.88598 | 30022 P | 1.019  | 40.63 | 0.72866 | 10560 |
| Tfg           | A_52_P510336  | AK039139     | Trk-fused gene                               | 1.142 | 72.2  | 0.79306 | 22265 M | 1.099  | 9.71  | 0.0808  | 2681  |
| Wdr45l        | A_52_P680436  | NM_025793    | Wdr45 like                                   | 1.142 | 75.14 | 0.77322 | 22420 P | 1.029  | 38.4  | 0.73014 | 10571 |
| 1110006O17Rik | A_52_P1026777 | NM_001033141 | RIKEN cDNA 1110006O17 gene                   | 1.141 | 79.26 | 0.85143 | 27839 P | 1.102  | 8.32  | 0.06486 | 2277  |
| Commd4        | A_51_P353592  | NM_025417    | COMM domain containing 4                     | 1.141 | 72.2  | 0.71034 | 18972 P | -1.021 | 47.92 | 0.62272 | 9643  |
| Cox5b         | A_51_P141123  | NM_009942    | cytochrome c oxidase, subunit Vb             | 1.141 | 53.87 | 0.72238 | 14984 M | -1.113 | 5.75  | 0.05912 | 2113  |
| Gng11         | A_51_P136355  | NM_025331    | guanine nucleotide binding protein (G pro    | 1.141 | 79.26 | 0.87021 | 28907 P | 1.092  | 25.31 | 0.56159 | 9127  |
| Gpkow         | A_51_P314584  | NM_173747    | G patch domain and KOW motifs                | 1.141 | 57.76 | 0.59813 | 13363 P | 1.009  | 42.43 | 0.87131 | 11768 |
| Rps26         | A_51_P302675  | NM_013765    | ribosomal protein S26                        | 1.141 | 72.2  | 0.78777 | 17468 M | -1.022 | 47.92 | 0.63614 | 9774  |
| 2700078E11Rik | A_52_P345618  | NM_030197    | RIKEN cDNA 2700078E11 gene                   | 1.14  | 65.79 | 0.63878 | 15648 P | 1.146  | 11.33 | 0.25544 | 5736  |
| Apoc2         | A_51_P334979  | NM_009695    | apolipoprotein C-II                          | 1.14  | 84.22 | 0.96504 | 36991 P | -1.097 | 13.58 | 0.10716 | 3223  |
| Emilin3       | A_52_P45616   | NM_182840    | elastin microfibril interfacier 3            | 1.14  |       | 0.88566 | 16329 A | -1.202 | 1.1   | 0.01553 | 664   |
| Gphn          | A_52_P551594  | NM_172952    | gephyrin                                     | 1.14  | 75.14 | 0.75532 | 21421 P | -1.321 | 0.51  | 0.00584 | 84    |
| Gtf2e1        | A_51_P236324  | NM_028812    | general transcription factor II E, polypepti | 1.14  | 69.29 | 0.6933  | 18071 P | 1.09   | 19.02 | 0.35004 | 6875  |
| Pspc1         | A_51_P330133  | NM_025682    | paraspeckle protein 1                        | 1.14  | 72.2  | 0.73378 | 20409 P | 1.092  | 11.33 | 0.11265 | 3327  |
| Tead4         | A_51_P179041  | D87966       | TEA domain family member 4                   | 1.14  | 79.26 | 0.83591 | 26816 M | 1.088  | 11.33 | 0.11876 | 3457  |
| Trim47        | A_51_P437176  | NM_172570    | tripartite motif protein 47                  | 1.14  | 82.34 | 0.9118  | 32141 P | 1.009  | 42.43 | 0.8792  | 11853 |
| Vps24         | A_52_P493394  | NM_025783    | vacuolar protein sorting 24 (yeast)          | 1.14  | 79.26 | 0.83789 | 26946 P | -1.073 | 28.13 | 0.21645 | 5138  |
| 2010003J03Rik | A_51_P474688  | NM_027236    | RIKEN cDNA 2010003J03 gene                   | 1.139 | 72.2  | 0.72548 | 20016 P | -1.006 | 49.48 | 0.92728 | 12368 |
| Cic           | A_52_P69351   | BC035474     | capicua homolog (Drosophila)                 | 1.139 | 69.29 | 0.69991 | 18381 P | -1.075 | 30.75 | 0.2565  | 5756  |
| Dtnbp1        | A_51_P234288  | AK030248     |                                              | 1.139 |       | 0.88336 | 16259 A | 1.038  | 25.31 | 0.36206 | 7047  |
| Ruvbl1        | A_51_P465772  | NM_019685    | RuvB-like protein 1                          | 1.139 | 65.79 | 0.63919 | 15660 P | 1.001  | 42.43 | 0.99328 | 13007 |
| Srpk2         | A_52_P587924  | NM_009274    | serine/arginine-rich protein specific kinas  | 1.139 | 61.79 | 0.61819 | 14295 P | 1.001  | 42.43 | 0.9918  | 12993 |
| Tfdp2         | A_52_P676469  | NM_178667    | transcription factor Dp 2                    | 1.139 | 75.14 | 0.76244 | 21792 P | 1.245  | 3.46  | 0.05809 | 2087  |
| Txndc1        | A_52_P499082  | NM_028339    | thioredoxin domain containing 1              | 1.139 | 77.44 | 0.81163 | 24808 P | 1.138  | 11.33 | 0.30334 | 6358  |
| 1810029B16Rik | A_51_P306839  | NM_025465    | RIKEN cDNA 1810029B16 gene                   | 1.138 | 81.02 | 0.90199 | 31185 P | 1.025  | 36.07 | 0.63764 | 9786  |
| 6720458F09Rik | A_51_P325152  | NM_177374    | RIKEN cDNA 6720458F09 gene                   | 1.138 | 77.44 | 0.80778 | 24565 P | 1.001  | 42.43 | 0.98072 | 12852 |
| Aplp2         | A_52_P559770  | NM_009691    | amyloid beta (A4) precursor-like protein 2   | 1.138 | 69.29 | 0.67959 | 17429 P | 1.632  | 3.82  | 0.20899 | 5031  |
| BC016423      | A_52_P544540  | AK220437     | cDNA sequence BC016423                       | 1.138 | 57.76 | 0.60436 | 13646 P | -1.087 | 11.33 | 0.08637 | 2809  |
| Bmp2k         | A_51_P337944  | NM_080708    | BMP2 inducible kinase                        | 1.138 | 61.79 | 0.61137 | 14014 P | 1.031  | 30.75 | 0.46737 | 8179  |
| Cox6b1        | A_51_P448032  | NM_025628    | cytochrome c oxidase, subunit VIb polype     | 1.138 | 72.2  | 0.80216 | 18062 M | -1.013 | 49.48 | 0.87035 | 11761 |
| Cst3          | A_51_P332201  | NM_009976    | cystatin C                                   | 1.138 | 81.02 | 0.89905 | 22422 M | 1.188  | 6.98  | 0.15788 | 4177  |
| Npy           | A_51_P454873  | NM_023456    | neuropeptide Y                               | 1.138 | 82.34 | 0.93529 | 34208 P | -1.066 | 44.4  | 0.65421 | 9910  |
| Sfrs5         | A_52_P50090   | NM_001079695 | splicing factor, arginine/serine-rich 5 (SRp | 1.138 | 81.02 | 0.894   | 22186 M | 1.166  | 16.2  | 0.46231 | 8134  |
| Slc4a4        | A_51_P273800  | NM_018760    | solute carrier family 4 (anion exchanger),   | 1.138 | 72.2  | 0.73663 | 20506 P | 1.161  | 9.71  | 0.2416  | 5525  |
| 2810452K22Rik | A_51_P204793  | NM_026048    | RIKEN cDNA 2810452K22 gene                   | 1.137 | 61.79 | 0.61261 | 14101 P | 1.055  | 22.1  | 0.3303  | 6671  |
| Cab39l        | A_52_P264905  | NM_026908    | calcium binding protein 39-like              | 1.137 | 61.79 | 0.62488 | 14678 P | 1.193  | 3.01  | 0.02183 | 920   |
| Cuedc2        | A_51_P403334  | NM_024192    | CUE domain containing 2                      | 1.137 | 75.14 | 0.77768 | 22612 P | 1.118  | 8.32  | 0.08176 | 2697  |
| Gtf2a1        | A_52_P274315  | NM_175335    | general transcription factor II A, 1         | 1.137 | 77.44 | 0.82602 | 25749 P | -1.056 | 30.75 | 0.21224 | 5079  |
| Hint2         | A_51_P278887  | NM_026871    | histidine triad nucleotide binding protein   | 1.137 | 57.76 | 0.60961 | 13926 P | -1.141 | 6.98  | 0.09869 | 3076  |
| Ipo7          | A_52_P239403  | NM_181517    | importin 7                                   | 1.137 | 65.79 | 0.6419  | 15784 P | 1.049  | 36.07 | 0.78783 | 11071 |
| Itpa          | A_52_P455404  | NM_025922    | inosine triphosphatase (nucleoside tripho    | 1.137 | 61.79 | 0.6297  | 15046 P | 1.365  | 0.75  | 0.0122  | 491   |

|               |              |                    |                                               |       |       |         |         |        |       |         |       |
|---------------|--------------|--------------------|-----------------------------------------------|-------|-------|---------|---------|--------|-------|---------|-------|
| Tkt           | A_51_P394515 | NM_009388          | transketolase                                 | 1.137 | 75.14 | 0.79424 | 23766 P | 1.032  | 30.75 | 0.46051 | 8106  |
| Tmed7         | A_51_P269997 | XM_128959          | transmembrane emp24 protein transport         | 1.137 | 61.79 | 0.63528 | 15489 P | 1.119  | 8.32  | 0.1018  | 3143  |
| Utp14a        | A_52_P543040 | NM_028276          | UTP14, U3 small nucleolar ribonucleopro       | 1.137 | 77.44 | 0.82824 | 25912 P | 1.04   | 28.13 | 0.36826 | 7138  |
| 2210418O10Rik | A_52_P195535 | BC048160           | RIKEN cDNA 2210418O10 gene                    | 1.136 | 72.2  | 0.71537 | 19243 P | 1.066  | 16.2  | 0.18469 | 4649  |
| 3110003A22Rik | A_52_P588022 | NM_026534          | RIKEN cDNA 3110003A22 gene                    | 1.136 | 65.79 | 0.64227 | 15818 P | -1.202 | 1.32  | 0.02967 | 1183  |
| 6330577E15Rik | A_51_P437188 | NM_026377          | RIKEN cDNA 6330577E15 gene                    | 1.136 | 61.79 | 0.62279 | 14570 P | 1.069  | 16.2  | 0.22657 | 5299  |
| Ankrd17       | A_52_P499395 | AK031350           | ankyrin repeat domain 17                      | 1.136 | 75.14 | 0.7596  | 21605 M | 1.022  | 38.4  | 0.71595 | 10452 |
| C230008H04Rik | A_52_P21400  | NM_176970          | mitogen activated protein kinase 10           | 1.136 | 75.14 | 0.78804 | 23267 P | 1.07   | 19.02 | 0.34362 | 6804  |
| Chchd1        | A_52_P48670  | NM_025366          | coiled-coil-helix-coiled-coil-helix domain c  | 1.136 | 72.2  | 0.74403 | 20782 P | 1.067  | 28.13 | 0.57905 | 9253  |
| Eif3s6        | A_52_P375037 | NM_008388          | eukaryotic translation initiation factor 3, s | 1.136 | 79.26 | 0.8473  | 27574 P | 1.085  | 22.1  | 0.48203 | 8340  |
| Fnbp1         | A_52_P105840 | NM_001038700       | formin binding protein 1                      | 1.136 | 75.14 | 0.77214 | 22353 P | 1.087  | 13.58 | 0.16893 | 4368  |
| Lamp1         | A_51_P150648 | NM_010684          | lysosomal-associated membrane protein         | 1.136 | 77.44 | 0.85187 | 20572 M | 1.146  | 5.75  | 0.06615 | 2326  |
| Ppp1r11       | A_51_P105320 | NM_029632          | protein phosphatase 1, regulatory (inhibit    | 1.136 | 72.2  | 0.73708 | 20523 P | 1.113  | 16.2  | 0.34969 | 6869  |
| Rdh10         | A_52_P59318  | NM_133832          | retinol dehydrogenase 10 (all-trans)          | 1.136 | 65.79 | 0.66554 | 16862 P | 1.153  | 4.63  | 0.03864 | 1461  |
| Sfrs1         | A_52_P525674 | NM_173374          | splicing factor, arginine/serine-rich 1 (ASF  | 1.136 | 82.34 | 0.91249 | 32265 P | 1.1    | 13.58 | 0.20046 | 4910  |
| Slc25a5       | A_51_P475446 | NM_007451          | solute carrier family 25 (mitochondrial ca    | 1.136 | 77.44 | 0.84158 | 20155 M | 1.134  | 8.32  | 0.1004  | 3107  |
| Spbc24        | A_51_P214209 | NM_026282          | SPC24, NDC80 kinetochore complex comp         | 1.136 | 79.26 | 0.84248 | 27240 P | 1.079  | 16.2  | 0.20501 | 4967  |
| Tcf15         | A_52_P299713 | NM_178254          | transcription factor-like 5 (basic helix-loop | 1.136 |       | 0.94386 | 13874 A | 1.027  | 36.07 | 0.60762 | 9505  |
| Znrf2         | A_52_P556586 | NM_199143          | zinc and ring finger 2                        | 1.136 | 69.29 | 0.69144 | 17994 P | -1.008 | 49.48 | 0.9219  | 12282 |
| Apon          | A_51_P100625 | NM_133996          | apolipoprotein N                              | 1.135 | 69.29 | 0.85117 | 23987 M | -1.015 | 49.48 | 0.73807 | 10665 |
| Ches1         | A_51_P172344 | NM_183186          | checkpoint suppressor 1                       | 1.135 | 72.2  | 0.72464 | 20000 P | 1.206  | 3.82  | 0.06967 | 2389  |
| Cybb          | A_52_P444628 | NM_007807          | cytochrome b-245, beta polypeptide            | 1.135 | 75.14 | 0.77894 | 22700 P | 1.052  | 22.1  | 0.32686 | 6637  |
| Naca          | A_51_P310030 | NM_013608          | nascent polypeptide-associated complex        | 1.135 | 72.2  | 0.78992 | 17557 M | -1.071 | 40.63 | 0.46523 | 8161  |
| Slc12a2       | A_51_P275527 | NM_009194          | solute carrier family 12, member 2            | 1.135 | 57.76 | 0.60428 | 13640 P | 1.183  | 3.46  | 0.03242 | 1273  |
| 4933407H18Rik | A_52_P217329 | AK016722           | RIKEN cDNA 4933407H18 gene                    | 1.134 | 75.14 | 0.75532 | 21420 P | 1.042  | 36.07 | 0.78177 | 11008 |
| Akr1a4        | A_51_P327295 | NM_021473          | aldo-keto reductase family 1, member A4       | 1.134 | 72.2  | 0.71367 | 19142 P | 1.065  | 19.02 | 0.27335 | 6002  |
| Fkbp14        | A_52_P396239 | NM_153573          | FK506 binding protein 14                      | 1.134 | 75.14 | 0.76647 | 22002 P | 1.162  | 5.75  | 0.0781  | 2608  |
| Gbas          | A_51_P228276 | NM_008095          | glioblastoma amplified sequence               | 1.134 | 77.44 | 0.83448 | 19679 M | 1.24   | 3.46  | 0.06396 | 2255  |
| Rps17         | A_51_P482473 | NM_009092          | ribosomal protein S17                         | 1.134 | 72.2  | 0.80671 | 18265 M | 1.033  | 36.07 | 0.74306 | 10727 |
| Snrpd1        | A_51_P193254 | NM_009226          | small nuclear ribonucleoprotein D1            | 1.134 | 75.14 | 0.78876 | 23368 P | 1.035  | 33.49 | 0.61301 | 9549  |
| Sox18         | A_51_P472274 | NM_009236          | SRY-box containing gene 18                    | 1.134 | 61.79 | 0.62081 | 14499 P | 1.013  | 42.43 | 0.79549 | 11142 |
| Tdrd3         | A_52_P124440 | AK078326           |                                               | 1.134 | 57.76 | 0.6079  | 13837 P | -1.18  | 1.32  | 0.02092 | 894   |
| Gart          | A_51_P360773 | AK028982           | phosphoribosylglycinamide formyltransfe       | 1.133 |       | 0.89165 | 16522 A | 1.073  | 11.33 | 0.12151 | 3532  |
| Gem           | A_51_P318192 | NM_010276          | GTP binding protein (gene overexpressed       | 1.133 | 83.36 | 0.93874 | 34481 P | 1.216  | 5.75  | 0.11384 | 3357  |
| Rplp1         | A_51_P219603 | NM_018853          | ribosomal protein, large, P1                  | 1.133 | 65.79 | 0.76648 | 16720 M | 1.011  | 42.43 | 0.92356 | 12330 |
| Rps14         | A_51_P361638 | NM_020600          | ribosomal protein S14                         | 1.133 | 77.44 | 0.85039 | 20513 M | 1.054  | 28.13 | 0.55846 | 9088  |
| Tcea1         | A_52_P493079 | M18209             | transcription elongation factor A (SII) 1     | 1.133 | 65.79 | 0.6532  | 16278 P | 1.041  | 36.07 | 0.73795 | 10660 |
| Uqcrh         | A_51_P431852 | NM_025641          | ubiquinol-cytochrome c reductase hinge p      | 1.133 | 57.76 | 0.74533 | 15930 M | 1.004  | 42.43 | 0.9611  | 12677 |
| Zcchc14       | A_51_P496057 | NM_080855          | zinc finger, CCHC domain containing 14        | 1.133 | 61.79 | 0.63395 | 15394 P | -1.081 | 25.31 | 0.21716 | 5157  |
| Zfyve20       | A_52_P293169 | AK053285           | zinc finger, FYVE domain containing 20        | 1.133 | 81.02 | 0.88647 | 30053 P | 1.057  | 22.1  | 0.36195 | 7043  |
| 1810058I24Rik | A_52_P477649 | AK158055           | RIKEN cDNA 1810058I24 gene                    | 1.132 | 72.2  | 0.72438 | 19970 P | 1.068  | 22.1  | 0.41258 | 7640  |
| 2810410L24Rik | A_52_P74524  | NM_175239          | RIKEN cDNA 2810410L24 gene                    | 1.132 | 77.44 | 0.83277 | 26310 P | 1.032  | 33.49 | 0.60971 | 9522  |
| Fbxl14        | A_52_P608542 | NM_133940          | F-box and leucine-rich repeat protein 14      | 1.132 | 69.29 | 0.69774 | 18262 P | 1.164  | 3.82  | 0.03483 | 1334  |
| Myst1         | A_51_P103757 | NM_026370          | MYST histone acetyltransferase 1              | 1.132 | 77.44 | 0.8176  | 25256 P | -1.063 | 43.15 | 0.53576 | 8894  |
| Nomo1         | A_51_P105520 | NM_153057          | nodal modulator 1                             | 1.132 | 81.02 | 0.80341 | 22872 P | -1.003 | 49.48 | 0.96863 | 12730 |
| Ppef2         | A_52_P413394 | NM_011148          | protein phosphatase, EF hand calcium-bir      | 1.132 | 82.34 | 0.91093 | 32031 P | -1.001 | 49.48 | 0.97561 | 12798 |
| Ppig          | A_51_P471798 | AK045812           | peptidyl-prolyl isomerase G (cyclophilin G    | 1.132 | 61.79 | 0.62385 | 14645 P | 1.158  | 9.71  | 0.21329 | 5088  |
| Taok1         | A_51_P350806 | BC019960           | TAO kinase 1                                  | 1.132 | 65.79 | 0.66542 | 16857 P | 1.144  | 3.82  | 0.03237 | 1271  |
| Zc3hc1        | A_51_P174005 | NM_172735          | zinc finger, C3HC type 1                      | 1.132 | 72.2  | 0.74437 | 20799 P | -1.053 | 38.4  | 0.30021 | 6321  |
| AI597468      | A_51_P344758 | ENSMUST00000075658 | expressed sequence AI597468                   | 1.131 | 72.2  | 0.74437 | 20790 P | 1.168  | 5.75  | 0.06884 | 2372  |
| Decr1         | A_51_P208555 | NM_026172          | 2,4-dienoyl CoA reductase 1, mitochondr       | 1.131 | 77.44 | 0.81247 | 24850 P | -1.02  | 49.39 | 0.73903 | 10682 |
| Fech          | A_51_P266763 | NM_007998          | ferrochelatase                                | 1.131 | 69.29 | 0.69196 | 18031 P | 1.131  | 4.63  | 0.0354  | 1372  |
| Fign1         | A_52_P148553 | NM_021891          | fidgetin-like 1                               | 1.131 | 79.26 | 0.83371 | 26380 P | -1.049 | 42.43 | 0.40356 | 7549  |



|               |              |                    |                                               |       |       |         |         |        |       |         |       |
|---------------|--------------|--------------------|-----------------------------------------------|-------|-------|---------|---------|--------|-------|---------|-------|
| Map4k4        | A_52_P584302 | NM_008696          | mitogen-activated protein kinase kinase k     | 1.131 | 75.14 | 0.7912  | 23537 P | 1.013  | 42.43 | 0.7967  | 11148 |
| Ndufv2        | A_51_P261470 | NM_028388          | NADH dehydrogenase (ubiquinone) flavo         | 1.131 | 72.2  | 0.71369 | 19163 P | -1.017 | 49.48 | 0.74228 | 10705 |
| Nkd2          | A_51_P345549 | NM_028186          | naked cuticle 2 homolog (Drosophila)          | 1.131 | 69.29 | 0.70278 | 17597 M | 1.042  | 30.75 | 0.48356 | 8367  |
| Poldip2       | A_52_P163928 | NM_026389          | polymerase (DNA-directed), delta interac      | 1.131 | 69.29 | 0.69909 | 18332 P | 1.118  | 6.98  | 0.05486 | 2001  |
| Rab11a        | A_52_P444162 | NM_017382          | RAB11a, member RAS oncogene family            | 1.131 | 69.29 | 0.67859 | 17382 P | 1.022  | 38.4  | 0.68458 | 10187 |
| Z310046O06Rik | A_52_P475062 | BY709465           | RIKEN cDNA Z310046O06 gene                    | 1.13  | 75.14 | 0.77487 | 22496 P | 1.086  | 16.2  | 0.2268  | 5308  |
| Arpp19        | A_51_P134413 | NM_021548          | cAMP-regulated phosphoprotein 19              | 1.13  | 72.2  | 0.72464 | 20002 P | 1.075  | 13.58 | 0.15788 | 4178  |
| Ddx50         | A_52_P242888 | BC071265           | DEAD (Asp-Glu-Ala-Asp) box polypeptide        | 1.13  | 75.14 | 0.76328 | 21851 P | 1.074  | 19.02 | 0.33195 | 6702  |
| Dtx3          | A_52_P495453 | NM_030714          | deltex 3 homolog (Drosophila)                 | 1.13  | 79.26 | 0.8672  | 28671 P | -1.16  | 3.01  | 0.05213 | 1923  |
| Eif3s12       | A_51_P341025 | NM_028659          | eukaryotic translation initiation factor 3, s | 1.13  | 79.26 | 0.84604 | 27488 P | -1.036 | 45.68 | 0.55036 | 9027  |
| H2-Ke2        | A_51_P368855 | NM_010385          | H2-K region expressed gene 2                  | 1.13  | 75.14 | 0.76035 | 21650 P | -1.132 | 4.63  | 0.05435 | 1986  |
| Rdbp          | A_52_P110270 | NM_001045864       | RD RNA-binding protein                        | 1.13  | 77.44 | 0.81533 | 25111 P | 1.117  | 6.98  | 0.05285 | 1943  |
| Rpl12         | A_51_P356023 | NM_009076          | ribosomal protein L12                         | 1.13  | 75.14 | 0.81447 | 18652 M | 1.117  | 11.33 | 0.20651 | 4997  |
| Rpl3          | A_51_P519024 | NM_013762          | ribosomal protein L3                          | 1.13  | 75.14 | 0.89431 | 24498 M | -1.095 | 22.1  | 0.1945  | 4809  |
| Rps2          | A_52_P277592 | NM_008503          | ribosomal protein S2                          | 1.13  | 77.44 | 0.83461 | 19788 M | 1.123  | 11.33 | 0.18052 | 4582  |
| Scmh1         | A_52_P499851 | AK083889           | sex comb on midleg homolog 1                  | 1.13  |       | 0.87051 | 18341 A | 1.058  | 25.31 | 0.46912 | 8197  |
| Serpine1      | A_52_P207173 | AK040662           | serine (or cysteine) peptidase inhibitor, cl  | 1.13  | 79.26 | 0.86697 | 28660 P | -1.082 | 22.1  | 0.15194 | 4065  |
| Setdb1        | A_52_P31717  | AF546078           | SET domain, bifurcated 1                      | 1.13  | 49.93 | 0.74904 | 17001 M | -1.016 | 49.48 | 0.7639  | 10884 |
| Trappc3       | A_51_P432930 | NM_013718          | trafficking protein particle complex 3        | 1.13  | 77.44 | 0.80108 | 24131 P | 1.054  | 22.1  | 0.2702  | 5961  |
| Whrn          | A_51_P303620 | NM_001008791       | whirlin                                       | 1.13  | 79.26 | 0.88759 | 28205 P | -1.012 | 49.48 | 0.85722 | 11649 |
| Zfp62         | A_52_P336133 | ENSMUST00000061757 | zinc finger protein 62                        | 1.13  | 72.2  | 0.72092 | 19636 P | -1.027 | 46.85 | 0.62077 | 9630  |
| Commd3        | A_51_P413785 | NM_147778          | COMM domain containing 3                      | 1.129 | 72.2  | 0.72376 | 19955 P | -1.041 | 45.05 | 0.58282 | 9289  |
| Cxcl12        | A_52_P685021 | NM_021704          | chemokine (C-X-C motif) ligand 12             | 1.129 | 65.79 | 0.65228 | 16189 P | 1.162  | 13.58 | 0.39044 | 7396  |
| D15Wsu75e     | A_51_P187612 | NM_134095          | DNA segment, Chr 15, Wayne State Unive        | 1.129 | 77.44 | 0.81068 | 24742 P | 1.01   | 42.43 | 0.86875 | 11749 |
| Denr          | A_51_P499776 | NM_026603          | density-regulated protein                     | 1.129 | 65.79 | 0.65947 | 16560 P | 1.032  | 33.49 | 0.61518 | 9580  |
| Dpm1          | A_51_P397834 | NM_010072          | dolichol-phosphate (beta-D) mannosyltra       | 1.129 | 77.44 | 0.82666 | 25793 P | 1.048  | 25.31 | 0.36194 | 7040  |
| Mylk          | A_51_P272407 | AK044527           | myosin, light polypeptide kinase              | 1.129 |       | 0.94822 | 13983 A | 1.006  | 42.43 | 0.96091 | 12673 |
| Phgdh1        | A_51_P353856 | NM_026861          | phosphoglycerate dehydrogenase like 1         | 1.129 | 65.79 | 0.65628 | 16408 P | 1.029  | 33.49 | 0.51338 | 8703  |
| Tomm20        | A_52_P310930 | NM_024214          | translocase of outer mitochondrial memt       | 1.129 | 69.29 | 0.70294 | 18561 P | 1.132  | 6.98  | 0.0637  | 2250  |
| Tsnax         | A_51_P236397 | NM_016909          | translin-associated factor X                  | 1.129 | 69.29 | 0.68225 | 17519 P | 1.176  | 3.01  | 0.02356 | 986   |
| Acsl5         | A_52_P593037 | NM_027976          | acyl-CoA synthetase long-chain family me      | 1.128 | 81.02 | 0.8816  | 29745 P | -1.044 | 45.05 | 0.59219 | 9354  |
| Atp5g3        | A_51_P294849 | NM_175015          | ATP synthase, H+ transporting, mitochon       | 1.128 | 69.29 | 0.79214 | 17671 M | 1.202  | 3.01  | 0.02522 | 1041  |
| Bysl          | A_51_P447946 | NM_016859          | bystin-like                                   | 1.128 | 72.2  | 0.71658 | 19312 P | 1.14   | 4.63  | 0.04205 | 1587  |
| E4f1          | A_51_P463348 | NM_007893          | E4F transcription factor 1                    | 1.128 | 81.02 | 0.87678 | 29370 P | -1.015 | 49.48 | 0.80843 | 11269 |
| Fyttd1        | A_52_P651078 | NM_027226          | forty-two-three domain containing 1           | 1.128 | 65.79 | 0.668   | 16941 P | 1.115  | 6.98  | 0.05545 | 2020  |
| Ostf1         | A_51_P277345 | NM_017375          | osteoclast stimulating factor 1               | 1.128 | 72.2  | 0.72625 | 20035 P | 1.182  | 3.01  | 0.0254  | 1054  |
| Resp18        | A_51_P178083 | NM_009049          | regulated endocrine-specific protein 18       | 1.128 | 77.44 | 0.83938 | 20073 M | -1.048 | 43.75 | 0.47441 | 8252  |
| Rsl1d1        | A_52_P362277 | NM_025546          | ribosomal L1 domain containing 1              | 1.128 | 79.26 | 0.8484  | 27635 P | -1.075 | 33.49 | 0.31175 | 6477  |
| Ttf2          | A_52_P634157 | AK078759           | transcription termination factor, RNA poly    | 1.128 | 82.34 | 0.8952  | 28701 M | 1.005  | 42.43 | 0.93445 | 12426 |
| 1110003E01Rik | A_52_P451123 | AK044403           | RIKEN cDNA 1110003E01 gene                    | 1.127 | 57.76 | 0.62828 | 14901 P | 1.197  | 2.04  | 0.01285 | 557   |
| 2410001C21Rik | A_52_P264368 | NM_025542          | RIKEN cDNA 2410001C21 gene                    | 1.127 | 69.29 | 0.68798 | 17816 P | 1.008  | 42.43 | 0.89086 | 11976 |
| Acat2         | A_51_P139748 | NM_009338          | acetyl-Coenzyme A acetyltransferase 2         | 1.127 | 61.79 | 0.78559 | 20592 P | -1.006 | 49.48 | 0.96755 | 12725 |
| Dmap1         | A_52_P472120 | NM_023178          | DNA methyltransferase 1-associated prot       | 1.127 | 77.44 | 0.79725 | 23957 P | 1.028  | 38.4  | 0.76771 | 10920 |
| Hoxa13        | A_52_P71789  | NM_008264          | homeo box A13                                 | 1.127 |       | 0.80462 | 17915 A | 1.073  | 16.2  | 0.17373 | 4441  |
| Igh-VJ558     | A_51_P270661 | AF029748           | immunoglobulin heavy chain (J558 family       | 1.127 | 65.79 | 0.66804 | 16946 P | -1.11  | 11.33 | 0.11709 | 3420  |
| Mfi2          | A_51_P324351 | NM_013900          | antigen p97 (melanoma associated) ident       | 1.127 | 75.14 | 0.78723 | 23201 M | 1.007  | 42.43 | 0.89842 | 12050 |
| Rpl31         | A_51_P452820 | NM_053257          | ribosomal protein L31                         | 1.127 | 65.79 | 0.65748 | 16459 P | 1.024  | 40.63 | 0.8064  | 11246 |
| Rps18         | A_51_P287677 | NM_011296          | ribosomal protein S18                         | 1.127 | 75.14 | 0.82666 | 19206 M | -1.17  | 3.82  | 0.08759 | 2829  |
| Sec23a        | A_52_P72839  | NM_009147          | SEC23A (S. cerevisiae)                        | 1.127 | 69.29 | 0.69665 | 18233 P | -1.039 | 43.75 | 0.65811 | 9208  |
| Wdr7          | A_52_P323305 | AK154451           | WD repeat domain 7                            | 1.127 | 61.79 | 0.63669 | 15567 P | -1.106 | 8.32  | 0.07263 | 2457  |
| Zadh2         | A_51_P137388 | NM_146090          | zinc binding alcohol dehydrogenase, dom       | 1.127 | 77.44 | 0.80959 | 24676 P | -1.188 | 1.32  | 0.0235  | 983   |
| Agpat1        | A_51_P322612 | NM_018862          | 1-acylglycerol-3-phosphate O-acyltransfe      | 1.126 | 81.02 | 0.90199 | 31182 P | -1.064 | 30.75 | 0.19377 | 4800  |
| Clec11a       | A_51_P359800 | NM_009131          | C-type lectin domain family 11, member        | 1.126 | 77.44 | 0.81904 | 25363 P | -1.008 | 49.48 | 0.90281 | 12122 |

|               |               |                    |                                                     |       |       |         |         |        |       |         |       |
|---------------|---------------|--------------------|-----------------------------------------------------|-------|-------|---------|---------|--------|-------|---------|-------|
| Cnot3         | A_52_P487127  | NM_146176          | CCR4-NOT transcription complex, subunit             | 1.126 | 77.44 | 0.81447 | 25029 P | 1.193  | 1.62  | 0.01227 | 498   |
| Cpt1a         | A_52_P219753  | NM_013495          | carnitine palmitoyltransferase 1a, liver            | 1.126 | 75.14 | 0.7874  | 23215 P | 1.16   | 8.32  | 0.15044 | 4045  |
| Cyp4a10       | A_52_P6588    | NM_010011          | cytochrome P450, family 4, subfamily a, p           | 1.126 | 61.79 | 0.63542 | 15491 M | -1.022 | 48.39 | 0.6778  | 10117 |
| Hrg           | A_51_P506309  | NM_053176          | histidine-rich glycoprotein                         | 1.126 | 61.79 | 0.65262 | 15539 M | 1.077  | 13.58 | 0.12855 | 3666  |
| Mtpn          | A_52_P385139  | NM_008098          | myotrophin                                          | 1.126 | 69.29 | 0.69758 | 18252 P | 1.23   | 1.32  | 0.00977 | 360   |
| Rad511        | A_52_P81571   | NM_009014          | RAD51-like 1 ( <i>S. cerevisiae</i> )               | 1.126 | 77.44 | 0.81753 | 23839 P | -1.301 | 0.51  | 0.00627 | 161   |
| Rpl23         | A_52_P651894  | NM_022891          | ribosomal protein L23                               | 1.126 | 65.79 | 0.77458 | 17022 M | 1.035  | 36.07 | 0.68236 | 10158 |
| Ssr1          | A_52_P274028  | AK078039           | signal sequence receptor, alpha                     | 1.126 | 72.2  | 0.72464 | 19979 P | 1.146  | 8.32  | 0.15514 | 4138  |
| Angptl3       | A_52_P209884  | AK040679           | angiopoietin-like 3                                 | 1.125 | 69.29 | 0.69665 | 18209 P | 1.003  | 42.43 | 0.96018 | 12659 |
| Bat2d         | A_52_P566337  | AK021383           | BAT2 domain containing 1                            | 1.125 | 75.14 | 0.7818  | 22850 P | -1.127 | 13.58 | 0.18566 | 4662  |
| Brca2         | A_51_P451106  | NM_009765          | breast cancer 2                                     | 1.125 | 61.79 | 0.63801 | 15612 P | 1.099  | 11.33 | 0.15194 | 4064  |
| Espl1         | A_52_P658437  | NM_001014976       | extra spindle poles-like 1 ( <i>S. cerevisiae</i> ) | 1.125 |       | 0.70666 | 16842 A | -1.158 | 3.46  | 0.05415 | 1980  |
| Fut11         | A_52_P641341  | NM_028428          | fucosyltransferase 11                               | 1.125 | 75.14 | 0.76244 | 21770 P | 1.042  | 28.13 | 0.37397 | 7215  |
| Gabpa         | A_52_P126238  | NM_008065          | GA repeat binding protein, alpha                    | 1.125 | 65.79 | 0.67268 | 17201 P | 1.094  | 16.2  | 0.26612 | 5893  |
| Garnl4        | A_52_P39756   | NM_001015046       | GTPase activating RANGAP domain-like 4              | 1.125 | 75.14 | 0.78559 | 23100 P | 1.184  | 5.75  | 0.08046 | 2671  |
| Gmeb1         | A_51_P520066  | NM_020273          | glucocorticoid modulatory element binding           | 1.125 | 61.79 | 0.64034 | 15691 P | -1.048 | 44.4  | 0.57598 | 9234  |
| Hps3          | A_51_P496934  | NM_080634          | Hermansky-Pudlak syndrome 3 homolog                 | 1.125 | 69.29 | 0.70217 | 18513 P | 1.057  | 28.13 | 0.56342 | 9143  |
| Inpp5a        | A_51_P364014  | NM_183144          | inositol polyphosphate-5-phosphatase A              | 1.125 | 69.29 | 0.70666 | 18759 P | 1.184  | 2.53  | 0.01567 | 671   |
| Ilgam         | A_52_P669155  | AK170324           | integrin alpha M                                    | 1.125 | 83.36 | 0.84299 | 25429 P | -1.061 | 40.63 | 0.42726 | 7790  |
| Mgl2          | A_52_P414065  | NM_145137          | macrophage galactose N-acetyl-galactosa             | 1.125 | 79.26 | 0.85249 | 27893 P | 1.138  | 9.71  | 0.17461 | 4458  |
| Mms19l        | A_52_P214936  | AK029840           | MMS19 ( <i>MET18 S. cerevisiae</i> )-like           | 1.125 |       | 0.7629  | 17975 A | 1.03   | 33.49 | 0.5296  | 8829  |
| Morf4l1       | A_52_P418724  | NM_001039147       | mortality factor 4 like 1                           | 1.125 | 77.44 | 0.80292 | 24243 P | 1.167  | 3.01  | 0.02043 | 877   |
| Nutf2         | A_52_P668715  | NM_026532          | nuclear transport factor 2                          | 1.125 | 75.14 | 0.75205 | 21181 P | 1.119  | 6.98  | 0.06143 | 2179  |
| Parn          | A_52_P25567   | NM_028761          | poly(A)-specific ribonuclease (deadenylat           | 1.125 | 81.02 | 0.894   | 30582 P | 1.077  | 19.02 | 0.30377 | 6362  |
| Prkcbp1       | A_51_P506015  | NM_027230          | protein kinase C binding protein 1                  | 1.125 | 69.29 | 0.69196 | 18030 P | 1.068  | 16.2  | 0.18589 | 4665  |
| Rab34         | A_52_P177454  | AK045474           | RAB34, member of RAS oncogene family                | 1.125 | 79.26 | 0.94373 | 24419 M | 1.068  | 16.2  | 0.20059 | 4913  |
| Tgfb1         | A_51_P390715  | NM_011577          | transforming growth factor, beta 1                  | 1.125 | 82.34 | 0.82288 | 24155 M | 1.174  | 3.82  | 0.04071 | 1551  |
| 3632451O06Rik | A_51_P465147  | NM_026142          | RIKEN cDNA 3632451O06 gene                          | 1.124 | 77.44 | 0.82885 | 25961 P | -1.085 | 28.13 | 0.28304 | 6119  |
| Cdc26         | A_52_P1180267 | AK028893           | cell division cycle 26                              | 1.124 |       | 0.87686 | 29387 A | 1.113  | 6.98  | 0.04963 | 1832  |
| D6Wsu176e     | A_51_P277416  | NM_138587          | DNA segment, Chr 6, Wayne State Univer              | 1.124 | 65.79 | 0.67567 | 17298 P | 1.008  | 42.43 | 0.90263 | 12118 |
| Pabpc4        | A_52_P393396  | NM_148917          | poly A binding protein, cytoplasmic 4               | 1.124 | 79.26 | 0.83591 | 26819 P | 1.055  | 22.1  | 0.28542 | 6156  |
| Polr2g        | A_51_P367843  | NM_026329          | polymerase (RNA) II (DNA directed) polyp            | 1.124 | 77.44 | 0.79241 | 23623 P | 1.137  | 11.33 | 0.21655 | 5149  |
| Rad23b        | A_52_P600625  | AK142280           | RAD23b homolog ( <i>S. cerevisiae</i> )             | 1.124 | 72.2  | 0.71359 | 19133 P | 1.02   | 38.4  | 0.71128 | 10415 |
| Ywhaq         | A_52_P215249  | AK037746           | tyrosine 3-monooxygenase/tryptophan 5               | 1.124 | 72.2  | 0.72137 | 19682 P | 1.149  | 4.63  | 0.04772 | 1784  |
| 1500005P14Rik | A_52_P108845  | XM_133283          | CAP-GLY domain containing linker protein            | 1.123 | 79.26 | 0.85109 | 27803 P | 1.138  | 4.63  | 0.03519 | 1358  |
| Dlat          | A_51_P265106  | NM_145614          | dihydroliipoamide S-acetyltransferase (E2           | 1.123 | 77.44 | 0.82962 | 26021 P | 1.18   | 4.63  | 0.05591 | 2027  |
| Hspd1         | A_52_P1172972 | NM_010477          | heat shock protein 1 (chaperonin)                   | 1.123 | 77.44 | 0.79266 | 23655 P | -1.039 | 43.15 | 0.37348 | 7208  |
| Lrrc17        | A_51_P301930  | BC030317           | leucine rich repeat containing 17                   | 1.123 | 72.2  | 0.74784 | 20976 P | -1.222 | 0.56  | 0.00989 | 374   |
| Mrpl30        | A_51_P440904  | NM_027098          | mitochondrial ribosomal protein L30                 | 1.123 | 79.26 | 0.84263 | 27248 P | -1.1   | 22.1  | 0.21893 | 5190  |
| Ndfip1        | A_51_P304879  | ENSMUST00000025293 | Nedd4 family interacting protein 1                  | 1.123 | 72.2  | 0.80447 | 18197 M | 1.202  | 2.53  | 0.02085 | 889   |
| Notch1        | A_51_P508510  | Z11886             | Notch gene homolog 1 ( <i>Drosophila</i> )          | 1.123 | 82.34 | 0.84642 | 22135 M | 1.225  | 4.63  | 0.09765 | 3052  |
| Prkar2a       | A_51_P217295  | NM_008924          | protein kinase, cAMP dependent regulato             | 1.123 | 82.34 | 0.80951 | 20062 M | 1.149  | 5.75  | 0.04955 | 1830  |
| Psme4         | A_52_P111438  | NM_134013          | proteasome (prosome, macropain) activa              | 1.123 | 79.26 | 0.84099 | 27158 P | -1.116 | 19.02 | 0.234   | 5411  |
| Smoc2         | A_51_P213045  | NM_022315          | SPARC related modular calcium binding 2             | 1.123 | 69.29 | 0.68577 | 17723 P | 1.119  | 8.32  | 0.07062 | 2413  |
| Ube2d3        | A_51_P259064  | AK020443           | ubiquitin-conjugating enzyme E2D 3 (UBC             | 1.123 | 57.76 | 0.76732 | 16761 M | 1.191  | 5.75  | 0.08627 | 2806  |
| Uqcrc2        | A_51_P128648  | NM_025899          | ubiquinol cytochrome c reductase core pr            | 1.123 | 61.79 | 0.72788 | 17704 P | -1.084 | 30.75 | 0.31396 | 6509  |
| 2810030E01Rik | A_52_P455643  | NM_028317          | RIKEN cDNA 2810030E01 gene                          | 1.122 | 81.02 | 0.8698  | 28863 P | 1.035  | 36.07 | 0.69546 | 10282 |
| Fusip1        | A_52_P372843  | AK161097           | FUS interacting protein (serine-arginine ri         | 1.122 | 65.79 | 0.66728 | 16909 P | 1.051  | 22.1  | 0.2897  | 6208  |
| Il2ra1        | A_52_P184362  | NM_178257          | interleukin 22 receptor, alpha 1                    | 1.122 |       | 0.80918 | 18106 A | -1.267 | 0.51  | 0.0108  | 420   |
| Leprotl1      | A_52_P496655  | NM_026609          | leptin receptor overlapping transcript-like         | 1.122 | 72.2  | 0.7185  | 19418 P | 1.01   | 42.43 | 0.94491 | 12530 |
| Manbal        | A_51_P440107  | NM_026968          | mannosidase, beta A, lysosomal-like                 | 1.122 | 75.14 | 0.76313 | 21844 P | 1.056  | 22.1  | 0.27115 | 5970  |
| Mbnl3         | A_52_P411264  | NM_134163          | muscleblind-like 3 ( <i>Drosophila</i> )            | 1.122 |       | 0.95176 | 14090 A | 1.188  | 4.63  | 0.06459 | 2271  |
| Nagk          | A_51_P206518  | NM_019542          | N-acetylglucosamine kinase                          | 1.122 | 75.14 | 0.75744 | 21499 P | 1.062  | 16.2  | 0.17898 | 4553  |

|               |              |                   |                                               |       |       |         |         |        |       |         |       |
|---------------|--------------|-------------------|-----------------------------------------------|-------|-------|---------|---------|--------|-------|---------|-------|
| Prpf39        | A_51_P250358 | NM_177806         | PRP39 pre-mRNA processing factor 39 ho        | 1.122 | 53.87 | 0.62876 | 14965 P | -1.279 | 0.51  | 0.00627 | 157   |
| Rpl7l1        | A_52_P343343 | NM_025433         | ribosomal protein L7-like 1                   | 1.122 | 72.2  | 0.73827 | 20566 P | 1.025  | 33.49 | 0.53859 | 8925  |
| Sftpb         | A_51_P269134 | NM_147779         | surfactant associated protein B               | 1.122 | 72.2  | 0.72788 | 17713 M | 1.046  | 25.31 | 0.38299 | 7316  |
| Tbcc          | A_51_P388801 | NM_178385         | tubulin-specific chaperone c                  | 1.122 | 81.02 | 0.8952  | 30662 P | 1.157  | 3.82  | 0.03282 | 1287  |
| Tcf2          | A_51_P484311 | NM_009330         | transcription factor 2                        | 1.122 | 61.79 | 0.64073 | 15709 P | 1.179  | 2.53  | 0.01834 | 781   |
| Timm17a       | A_51_P167843 | NM_011590         | translocase of inner mitochondrial memb       | 1.122 | 61.79 | 0.64743 | 15968 P | -1.022 | 48.39 | 0.64822 | 9869  |
| Zfp469        | A_51_P224962 | NM_178242         | zinc finger protein 469                       | 1.122 | 82.34 | 0.93084 | 33903 P | 1.039  | 28.13 | 0.41686 | 7708  |
| 5730410119Rik | A_51_P242076 | NM_025666         | RIKEN cDNA 5730410119 gene                    | 1.121 | 72.2  | 0.71763 | 19375 P | 1.035  | 36.07 | 0.67797 | 10121 |
| Taf1a         | A_52_P618511 | NM_021466         | TATA box binding protein (Tbp)-associat       | 1.121 | 75.14 | 0.75006 | 21077 P | 1.035  | 30.75 | 0.43635 | 7900  |
| Tpm1          | A_51_P325173 | AK077713          | tropomyosin 1, alpha                          | 1.121 | 81.02 | 0.88057 | 29694 P | 1.199  | 8.32  | 0.24471 | 5572  |
| 5330431N19Rik | A_51_P369294 | NM_172639         | RIKEN cDNA 5330431N19 gene                    | 1.12  | 79.26 | 0.86362 | 28413 P | 1.083  | 13.58 | 0.17007 | 4384  |
| Ankib1        | A_52_P155302 | NM_001003909      | ankyrin repeat and IBR domain containi        | 1.12  | 77.44 | 0.7912  | 23536 P | 1.2    | 8.32  | 0.18704 | 4684  |
| Bag1          | A_51_P224505 | NM_009736         | Bcl2-associated athanogene 1                  | 1.12  | 69.29 | 0.68776 | 17810 P | 1.089  | 11.33 | 0.11932 | 3473  |
| Basp1         | A_52_P26794  | NM_027395         | brain abundant, membrane attached sign        | 1.12  | 77.44 | 0.80242 | 24178 P | 1.091  | 25.17 | 0.55602 | 9075  |
| Dek           | A_52_P477709 | NM_025900         | DEK oncogene (DNA binding)                    | 1.12  | 65.79 | 0.67211 | 17140 P | 1.042  | 25.31 | 0.31613 | 6542  |
| Eif2s3x       | A_51_P256154 | NM_012010         | eukaryotic translation initiation factor 2, s | 1.12  | 75.14 | 0.82109 | 18957 M | 1.089  | 22.1  | 0.53135 | 8853  |
| Emb           | A_51_P382849 | NM_010330         | embigin                                       | 1.12  | 75.14 | 0.83273 | 19531 M | 1.022  | 36.07 | 0.59408 | 9376  |
| Hmgn1         | A_51_P134408 | AK080436          | high mobility group nucleosomal binding       | 1.12  | 82.34 | 0.91547 | 32631 P | 1.077  | 19.02 | 0.30574 | 6392  |
| Pi4k2a        | A_51_P345470 | NM_145501         | phosphatidylinositol 4-kinase type 2 alph     | 1.12  | 79.26 | 0.83609 | 26824 P | 1.142  | 6.98  | 0.064   | 2256  |
| Rbm19         | A_51_P144512 | NM_028762         | RNA binding motif protein 19                  | 1.12  | 81.02 | 0.86821 | 28758 P | -1.276 | 0.51  | 0.00869 | 318   |
| Serpina6      | A_51_P133562 | NM_007618         | serine (or cysteine) peptidase inhibitor, cl  | 1.12  | 75.14 | 0.78158 | 22844 P | -1.043 | 43.75 | 0.42124 | 7741  |
| Srpx          | A_51_P316871 | NM_016911         | sushi-repeat-containing protein               | 1.12  | 75.14 | 0.78251 | 20471 A | 1.014  | 42.43 | 0.83146 | 11474 |
| Taf10         | A_52_P263589 | ENSMUST0000054556 |                                               | 1.12  | 77.44 | 0.79643 | 23902 P | -1.078 | 30.75 | 0.25651 | 5759  |
| 2610510H03Rik | A_52_P656867 | NM_026620         | RIKEN cDNA 2610510H03 gene                    | 1.119 | 61.79 | 0.66133 | 16635 P | -1.026 | 46.85 | 0.58281 | 9287  |
| 3110031B13Rik | A_52_P203981 | NM_026075         | RIKEN cDNA 3110031B13 gene                    | 1.119 | 61.79 | 0.64836 | 16023 P | 1.048  | 30.75 | 0.59239 | 9358  |
| A730011L01Rik | A_52_P19662  | NM_177394         | RIKEN cDNA A730011L01 gene                    | 1.119 | 65.79 | 0.67248 | 17187 P | -1.076 | 40.63 | 0.51199 | 8690  |
| Aldh16a1      | A_51_P407311 | NM_145954         | aldehyde dehydrogenase 16 family, mem         | 1.119 | 75.14 | 0.75944 | 21592 P | -1.017 | 49.48 | 0.74857 | 10777 |
| Kpnb1         | A_52_P275627 | NM_008379         | karyopherin (importin) beta 1                 | 1.119 | 69.29 | 0.69196 | 18033 P | 1.176  | 5.75  | 0.09758 | 3051  |
| Lsm7          | A_51_P200044 | NM_025349         | LSM7 homolog, U6 small nuclear RNA ass        | 1.119 | 69.29 | 0.69975 | 18363 P | -1.078 | 22.1  | 0.13943 | 3839  |
| M6pr          | A_51_P439170 | NM_010749         | mannose-6-phosphate receptor, cation de       | 1.119 | 75.14 | 0.75932 | 21561 P | 1.112  | 11.33 | 0.22996 | 5350  |
| Me3           | A_51_P396000 | NM_181407         | malic enzyme 3, NADP(+)-dependent, mit        | 1.119 | 75.14 | 0.90463 | 16940 A | -1.084 | 22.1  | 0.15965 | 4210  |
| Punc          | A_51_P436559 | AK012957          | putative neuronal cell adhesion molecule      | 1.119 | 81.02 | 0.84655 | 25682 M | 1.062  | 16.2  | 0.19793 | 4866  |
| Snx19         | A_52_P337478 | NM_028874         | sorting nexin 19                              | 1.119 | 69.29 | 0.70887 | 18877 P | 1.163  | 3.46  | 0.02221 | 939   |
| Atp5h         | A_51_P264186 | NM_027862         | ATP synthase, H+ transporting, mitochon       | 1.118 | 79.26 | 0.87051 | 21233 M | -1.015 | 49.48 | 0.882   | 11879 |
| Capns1        | A_51_P399538 | NM_009795         | calpain, small subunit 1                      | 1.118 | 65.79 | 0.68027 | 17450 P | 1.139  | 6.98  | 0.08145 | 2692  |
| Clk1          | A_51_P193573 | NM_001042634      | CDC-like kinase 1                             | 1.118 | 77.44 | 0.85901 | 20762 M | 1.098  | 22.1  | 0.53498 | 8888  |
| Eef1b2        | A_51_P412595 | NM_018796         | eukaryotic translation elongation factor 1    | 1.118 | 82.34 | 0.91949 | 23587 M | 1.087  | 19.02 | 0.3661  | 7116  |
| Gpx1          | A_52_P684378 | NM_008160         | glutathione peroxidase 1                      | 1.118 | 72.2  | 0.81427 | 18632 M | 1.22   | 3.01  | 0.03601 | 1392  |
| Hs2st1        | A_52_P564132 | NM_011828         | heparan sulfate 2-O-sulfotransferase 1        | 1.118 | 69.29 | 0.69709 | 18244 P | 1.053  | 25.31 | 0.37912 | 7271  |
| Irf3          | A_52_P609770 | AK050570          | interferon regulatory factor 3                | 1.118 | 81.02 | 0.86758 | 28716 P | -1.02  | 48.39 | 0.64644 | 9857  |
| Nras          | A_52_P649296 | NM_010937         | neuroblastoma ras oncogene                    | 1.118 | 77.44 | 0.79241 | 23621 P | 1.087  | 9.71  | 0.09648 | 3026  |
| Odz3          | A_52_P206429 | NM_011857         | odd Oz/ten-m homolog 3 (Drosophila)           | 1.118 | 69.29 | 0.79372 | 20655 P | 2.444  | 0     | 0.00584 | 86    |
| Rbbp5         | A_51_P516850 | NM_172517         | retinoblastoma binding protein 5              | 1.118 | 77.44 | 0.82935 | 25997 P | 1.048  | 28.13 | 0.49593 | 8522  |
| Rbm3          | A_51_P262340 | BC106176          | RNA binding motif protein 3                   | 1.118 | 82.34 | 0.92551 | 23882 M | 1.056  | 22.1  | 0.27939 | 6089  |
| Sfrs7         | A_52_P649685 | NM_146083         | splicing factor, arginine/serine-rich 7       | 1.118 | 75.14 | 0.82885 | 19317 M | -1.104 | 42.43 | 0.6184  | 9614  |
| Srebf2        | A_52_P302001 | NM_033218         | sterol regulatory element binding factor 2    | 1.118 | 75.14 | 0.87152 | 18397 A | -1.056 | 43.75 | 0.53923 | 8933  |
| Tceal8        | A_51_P135379 | NM_025703         | transcription elongation factor A (SII)-like  | 1.118 | 79.26 | 0.84642 | 27530 P | 1.062  | 25.31 | 0.41879 | 7720  |
| 1810013L24Rik | A_52_P316437 | ENSMUST0000023150 | RIKEN cDNA 1810013L24 gene                    | 1.117 | 79.26 | 0.83817 | 26968 P | 1.012  | 42.43 | 0.80555 | 11226 |
| 2010100O12Rik | A_51_P199148 | NM_025946         | RIKEN cDNA 2010100O12 gene                    | 1.117 | 75.14 | 0.76732 | 22045 P | -1.058 | 43.15 | 0.51123 | 8680  |
| Esrra         | A_52_P198949 | AK046588          | estrogen related receptor, alpha              | 1.117 | 77.44 | 0.81287 | 24890 P | 1.008  | 42.43 | 0.90375 | 12124 |
| Gtf3c2        | A_51_P354102 | NM_027901         | general transcription factor IIC, polypept    | 1.117 | 72.2  | 0.74473 | 20840 P | 1.149  | 13.58 | 0.37208 | 7197  |
| Ppp1r12a      | A_52_P437363 | NM_027892         | protein phosphatase 1, regulatory (inhibit    | 1.117 | 72.2  | 0.7198  | 19512 P | 1.16   | 4.63  | 0.04544 | 1704  |
| Qscn6l1       | A_52_P138895 | NM_153559         | quiescin Q6-like 1                            | 1.117 | 79.26 | 0.83883 | 27044 P | 1.126  | 4.63  | 0.03484 | 1335  |

|               |               |                    |                                                               |       |       |         |         |        |       |         |       |
|---------------|---------------|--------------------|---------------------------------------------------------------|-------|-------|---------|---------|--------|-------|---------|-------|
| Rab1b         | A_51_P344950  | NM_029576          | RAB1B, member RAS oncogene family                             | 1.117 | 77.44 | 0.82266 | 25584 P | 1.015  | 40.63 | 0.73517 | 10634 |
| Tob1          | A_51_P293339  | NM_009427          | transducer of ErbB-2.1                                        | 1.117 | 77.44 | 0.7912  | 23546 P | 1.037  | 30.75 | 0.48221 | 8342  |
| 120001118Rik  | A_51_P455776  | NM_026177          | RIKEN cDNA 120001118 gene                                     | 1.116 | 77.44 | 0.79306 | 23688 P | 1.032  | 30.75 | 0.46306 | 8141  |
| Coro1c        | A_52_P634856  | NM_011779          | coronin, actin binding protein 1C                             | 1.116 | 77.44 | 0.79365 | 23721 P | -1.116 | 16.2  | 0.1871  | 4686  |
| Dpp3          | A_52_P266435  | AK039975           | dipeptidylpeptidase 3                                         | 1.116 | 83.95 | 0.91932 | 30566 M | -1.073 | 25.31 | 0.15232 | 4073  |
| Ngly1         | A_51_P419111  | NM_021504          | N-glycanase 1                                                 | 1.116 | 77.44 | 0.81753 | 25249 P | 1.14   | 5.75  | 0.05211 | 1919  |
| Rrad          | A_51_P240253  | NM_019662          | Ras-related associated with diabetes                          | 1.116 | 69.29 | 0.71133 | 19033 P | 1.183  | 4.63  | 0.07192 | 2430  |
| Stag2         | A_51_P126540  | NM_001077712       | stromal antigen 2                                             | 1.116 | 77.44 | 0.81125 | 24796 P | 1.074  | 13.58 | 0.1683  | 4352  |
| Tial1         | A_51_P441942  | NM_009383          | Tia1 cytotoxic granule-associated RNA binding protein         | 1.116 | 79.26 | 0.88103 | 21615 M | 1.129  | 19.02 | 0.52251 | 8772  |
| Uck2          | A_52_P135392  | BC004016           | uridine-cytidine kinase 2                                     | 1.116 | 79.26 | 0.84604 | 27484 P | 1.131  | 6.98  | 0.05741 | 2076  |
| 2810008M24Rik | A_51_P409761  | NM_001048250       | RIKEN cDNA 2810008M24 gene                                    | 1.115 | 77.44 | 0.79285 | 23677 P | -1.117 | 13.58 | 0.15611 | 4149  |
| 6720401G13Rik | A_52_P223508  | AK081581           | RIKEN cDNA 6720401G13 gene                                    | 1.115 | 82.34 | 0.91605 | 32696 P | -1.3   | 3.01  | 0.15274 | 4081  |
| Ap1b1         | A_51_P138348  | NM_007454          | adaptor protein complex AP-1, beta 1 subunit                  | 1.115 | 77.44 | 0.81591 | 25148 P | -1.081 | 19.02 | 0.13882 | 3817  |
| C330006K01Rik | A_51_P118779  | NM_172725          | RIKEN cDNA C330006K01 gene                                    | 1.115 | 79.26 | 0.85807 | 28129 P | -1.041 | 44.4  | 0.47852 | 8293  |
| Dcbl2         | A_52_P56955   | NM_028523          | discoidin, CUB and LCLL domain containing protein             | 1.115 | 69.29 | 0.69991 | 18379 P | -1.022 | 47.43 | 0.60743 | 9504  |
| Ddx21         | A_52_P424037  | NM_019553          | DEAD (Asp-Glu-Ala-Asp) box polypeptide                        | 1.115 | 81.02 | 0.90266 | 31221 P | -1.003 | 49.48 | 0.9761  | 12803 |
| Gys1          | A_52_P228932  | NM_030678          | glycogen synthase 1, muscle                                   | 1.115 | 77.44 | 0.76648 | 20890 M | 1.042  | 28.13 | 0.38739 | 7366  |
| Hist1h1c      | A_51_P516133  | NM_015786          | histone cluster 1, H1c                                        | 1.115 | 77.44 | 0.84821 | 20429 M | 1.193  | 13.58 | 0.39596 | 7471  |
| Igfbp4        | A_52_P257502  | NM_010517          | insulin-like growth factor binding protein 4                  | 1.115 | 77.44 | 0.82688 | 25840 P | 1.003  | 42.43 | 0.96945 | 12741 |
| Mrps24        | A_52_P507310  | NM_026080          | mitochondrial ribosomal protein S24                           | 1.115 | 75.14 | 0.75595 | 21449 P | 1.12   | 9.71  | 0.11657 | 3410  |
| Rfxap         | A_52_P441044  | AK087489           | regulatory factor X-associated protein                        | 1.115 | 72.2  | 0.74123 | 20663 P | 1.11   | 11.33 | 0.14894 | 4028  |
| Strn          | A_51_P252061  | NM_011500          | striatin, calmodulin binding protein                          | 1.115 | 65.79 | 0.81287 | 21582 M | 1.015  | 42.43 | 0.80265 | 11199 |
| Aspscr1       | A_51_P121652  | NM_026877          | alveolar soft part sarcoma chromosome region 1                | 1.114 | 69.29 | 0.70048 | 18405 P | 1.037  | 30.75 | 0.47441 | 8248  |
| Crtap         | A_51_P201721  | NM_019922          | cartilage associated protein                                  | 1.114 | 75.14 | 0.75699 | 21480 P | -1.067 | 36.07 | 0.3338  | 6725  |
| Efnb3         | A_52_P495565  | NM_007911          | ephrin B3                                                     | 1.114 | 79.26 | 0.83788 | 26928 P | -1.225 | 0.75  | 0.01279 | 553   |
| Emp3          | A_51_P446510  | NM_010129          | epithelial membrane protein 3                                 | 1.114 | 75.14 | 0.78956 | 23402 P | -1.081 | 13.58 | 0.09833 | 3072  |
| Fbxo11        | A_51_P479802  | ENSMUST00000005504 | F-box protein 11                                              | 1.114 | 77.44 | 0.79875 | 24028 P | 1.192  | 3.82  | 0.04966 | 1839  |
| Kctd9         | A_51_P454638  | NM_134073          | potassium channel tetramerisation domain containing protein 9 | 1.114 | 69.29 | 0.7132  | 19113 P | 1.127  | 8.32  | 0.08823 | 2854  |
| Ptprf         | A_52_P148883  | NM_011213          | protein tyrosine phosphatase, receptor type 1                 | 1.114 | 79.26 | 0.85117 | 27819 P | 1.149  | 8.32  | 0.16153 | 4246  |
| Pvr12         | A_51_P475858  | NM_008990          | poliovirus receptor-related 2                                 | 1.114 | 75.14 | 0.77047 | 22217 P | 1.108  | 9.71  | 0.11939 | 3482  |
| Slc35a5       | A_52_P51198   | NM_028756          | solute carrier family 35, member A5                           | 1.114 | 75.14 | 0.75588 | 21447 P | -1.006 | 49.48 | 0.90871 | 12181 |
| Synj2bp       | A_52_P662001  | NM_025292          | synaptotagmin 2 binding protein                               | 1.114 | 72.2  | 0.735   | 20445 P | 1.02   | 38.4  | 0.65376 | 9908  |
| Trip12        | A_52_P1068111 | AK041991           | thyroid hormone receptor interactor 12                        | 1.114 | 83.36 | 0.93339 | 34105 P | 1.11   | 8.32  | 0.05981 | 2145  |
| 1200004M23Rik | A_51_P472659  | NM_026169          | RIKEN cDNA 1200004M23 gene                                    | 1.113 | 72.2  | 0.73771 | 20549 P | 1.096  | 9.71  | 0.08544 | 2782  |
| 1810019J16Rik | A_51_P142258  | NM_133707          | RIKEN cDNA 1810019J16 gene                                    | 1.113 | 81.02 | 0.89183 | 30401 P | -1.103 | 16.2  | 0.15879 | 4193  |
| AL033314      | A_52_P467140  | NM_019776          | staphylococcal nuclease and tudor domain containing protein   | 1.113 | 65.79 | 0.68802 | 17829 P | 1.184  | 6.98  | 0.15944 | 4208  |
| Dnajc3        | A_52_P329875  | NM_008929          | Dnaj (Hsp40) homolog, subfamily C, member 3                   | 1.113 | 75.14 | 0.77259 | 22374 P | -1.119 | 25.31 | 0.35602 | 6966  |
| Fbxo18        | A_51_P472323  | NM_015792          | F-box protein 18                                              | 1.113 | 75.14 | 0.77678 | 22563 P | 1.064  | 19.02 | 0.24236 | 5530  |
| Gsc           | A_51_P370717  | NM_010351          | goosecoid                                                     | 1.113 |       | 0.92907 | 17584 A | 1.101  | 8.32  | 0.06694 | 2341  |
| Klhl2         | A_51_P398164  | NM_178633          | kelch-like 2, Mayven (Drosophila)                             | 1.113 | 61.79 | 0.74784 | 18565 P | 1.067  | 22.1  | 0.35017 | 6876  |
| Rab18         | A_52_P180210  | AK034242           | RAB18, member RAS oncogene family                             | 1.113 | 81.02 | 0.8782  | 29492 P | 1.042  | 30.75 | 0.49241 | 8472  |
| Sox10         | A_52_P192625  | BC023356           | SRY-box containing gene 10                                    | 1.113 | 81.02 | 0.83252 | 24669 M | 1.063  | 19.02 | 0.23793 | 5459  |
| Ard1          | A_51_P195324  | NM_019870          | N-acetyltransferase ARD1 homolog (S. cerevisiae)              | 1.112 | 81.02 | 0.87616 | 29341 P | 1.068  | 16.2  | 0.17637 | 4507  |
| BC017643      | A_51_P457130  | NM_144832          | cDNA sequence BC017643                                        | 1.112 | 72.2  | 0.73228 | 20364 P | -1.185 | 1.58  | 0.02629 | 1082  |
| Ciz1          | A_52_P280344  | NM_028412          | CDKN1A interacting zinc finger protein 1                      | 1.112 | 72.2  | 0.72221 | 19764 P | -1.039 | 45.05 | 0.57371 | 9218  |
| Creg1         | A_51_P111762  | NM_011804          | cellular repressor of E1A-stimulated gene 1                   | 1.112 | 77.44 | 0.81378 | 24964 P | -1.198 | 2.04  | 0.05188 | 1908  |
| Cul7          | A_51_P293753  | NM_025611          | cullin 7                                                      | 1.112 | 77.44 | 0.82149 | 25476 P | -1.074 | 30.75 | 0.25546 | 5285  |
| Mapk1         | A_51_P481788  | NM_011949          | mitogen activated protein kinase 1                            | 1.112 | 72.2  | 0.73504 | 20450 P | 1.107  | 9.71  | 0.09576 | 3010  |
| Mybl2         | A_51_P351144  | NM_008652          | myeloblastosis oncogene-like 2                                | 1.112 | 72.2  | 0.74028 | 20638 P | 1.091  | 9.71  | 0.0895  | 2879  |
| Psm1          | A_51_P469578  | NM_011965          | proteasome (prosome, macropain) subunit type 1, alpha         | 1.112 | 75.14 | 0.76881 | 22150 P | -1.095 | 13.58 | 0.11028 | 3276  |
| Rab2b         | A_51_P446132  | NM_172601          | RAB2B, member RAS oncogene family                             | 1.112 | 77.44 | 0.81818 | 25309 P | -1.167 | 1.58  | 0.02543 | 1055  |
| Senp6         | A_51_P293989  | NM_146003          | SUMO/sentrin specific peptidase 6                             | 1.112 | 77.44 | 0.80132 | 24144 P | 1.057  | 19.02 | 0.25188 | 5677  |
| Tarbp2        | A_51_P111583  | NM_009319          | TAR (HIV) RNA binding protein 2                               | 1.112 | 77.44 | 0.80216 | 24164 P | 1.234  | 6.98  | 0.17381 | 4447  |

|               |              |              |                                             |       |       |         |         |        |       |         |       |
|---------------|--------------|--------------|---------------------------------------------|-------|-------|---------|---------|--------|-------|---------|-------|
| 6620401M08Rik | A_52_P244312 | AK158571     | RIKEN cDNA 6620401M08 gene                  | 1.111 | 79.26 | 0.85452 | 27989 P | -1.166 | 13.58 | 0.27879 | 6075  |
| Arbp          | A_51_P134602 | NM_007475    | acidic ribosomal phosphoprotein P0          | 1.111 | 75.14 | 0.82983 | 19377 M | 1.1    | 9.71  | 0.0911  | 2922  |
| Cfdp1         | A_51_P446978 | NM_011801    | craniofacial development protein 1          | 1.111 | 75.14 | 0.78472 | 23040 P | -1.014 | 49.48 | 0.79418 | 11130 |
| Itch          | A_52_P209852 | XM_902526    | itchy, E3 ubiquitin protein ligase          | 1.111 | 81.02 | 0.83817 | 25140 P | 1.21   | 3.82  | 0.05472 | 1998  |
| Tommm40       | A_52_P495318 | NM_016871    | translocase of outer mitochondrial mem      | 1.111 | 75.14 | 0.75282 | 21257 P | -1.031 | 46.85 | 0.61343 | 9560  |
| Trnt1         | A_52_P456629 | NM_027296    | tRNA nucleotidyl transferase, CCA-adding    | 1.111 | 72.2  | 0.7491  | 21046 P | 1.001  | 42.43 | 0.98432 | 12912 |
| Vamp3         | A_51_P252212 | NM_009498    | vesicle-associated membrane protein 3       | 1.111 | 75.14 | 0.75861 | 21538 P | 1.061  | 25.31 | 0.44926 | 7987  |
| Wdr34         | A_51_P438461 | NM_001008498 | WD repeat domain 34                         | 1.111 | 69.29 | 0.70113 | 18442 P | -1.04  | 45.68 | 0.64526 | 9848  |
| Wdr6          | A_51_P118650 | NM_031392    | WD repeat domain 6                          | 1.111 | 81.02 | 0.878   | 29481 P | 1.254  | 3.82  | 0.08255 | 2719  |
| 5730455P16Rik | A_51_P169564 | NM_027472    | RIKEN cDNA 5730455P16 gene                  | 1.11  | 72.2  | 0.74313 | 20723 P | 1.206  | 11.33 | 0.35276 | 6919  |
| 9430016H08Rik | A_51_P224468 | BC071241     | RIKEN cDNA 9430016H08 gene                  | 1.11  | 75.14 | 0.7744  | 22477 P | 1.037  | 30.75 | 0.48541 | 8388  |
| Abhd6         | A_52_P496497 | NM_025341    | abhydrolase domain containing 6             | 1.11  | 81.02 | 0.86821 | 28760 P | 1.07   | 22.1  | 0.41151 | 7625  |
| Atp6v0c       | A_52_P601240 | NM_009729    | ATPase, H+ transporting, lysosomal V0 su    | 1.11  | 75.14 | 0.76648 | 22004 P | 1.159  | 3.46  | 0.02567 | 1059  |
| Bet1          | A_51_P432449 | NM_009748    | blocked early in transport 1 homolog (S. c  | 1.11  | 75.14 | 0.78804 | 23266 P | -1.146 | 8.32  | 0.13222 | 3719  |
| Cct5          | A_51_P144783 | NM_007637    | chaperonin subunit 5 (epsilon)              | 1.11  | 83.95 | 0.85237 | 22451 M | 1.011  | 42.43 | 0.86296 | 11702 |
| D13Wsu50e     | A_51_P219433 | NM_138596    | mediator of RNA polymerase II transcripti   | 1.11  | 77.44 | 0.81296 | 24905 P | 1.006  | 42.43 | 0.971   | 12752 |
| Dnpep         | A_51_P128096 | NM_016878    | aspartyl aminopeptidase                     | 1.11  | 77.44 | 0.81247 | 24844 P | -1.072 | 30.75 | 0.23    | 5354  |
| Gylt1b        | A_52_P201992 | AK081797     | glycosyltransferase-like 1B                 | 1.11  | 75.14 | 0.77416 | 22462 P | -1.177 | 1.32  | 0.02005 | 858   |
| Mrps21        | A_51_P509012 | NM_078479    | mitochondrial ribosomal protein S21         | 1.11  | 75.14 | 0.77599 | 22524 P | 1.113  | 6.98  | 0.05346 | 1967  |
| Nicn1         | A_52_P94845  | NM_025449    | nicolin 1                                   | 1.11  | 75.14 | 0.78472 | 23048 P | 1.046  | 30.75 | 0.63274 | 9745  |
| Scfd1         | A_52_P140299 | AK049361     | sec1 family domain containing 1             | 1.11  | 72.2  | 0.72853 | 20143 P | -1.078 | 30.75 | 0.25649 | 5753  |
| Sdhc          | A_52_P875481 | AK031343     |                                             | 1.11  | 72.2  | 0.75092 | 21136 P | 1.05   | 30.75 | 0.5823  | 9275  |
| Tia1          | A_51_P225889 | NM_011585    | cytotoxic granule-associated RNA binding    | 1.11  | 82.34 | 0.90463 | 31403 P | -1.069 | 30.75 | 0.22129 | 5224  |
| Btbd7         | A_51_P330658 | AK122522     | BTB (POZ) domain containing 7               | 1.109 | 82.34 | 0.9186  | 32888 P | 1.084  | 11.33 | 0.09861 | 3074  |
| Itk           | A_52_P50623  | AK037554     | IL2-inducible T-cell kinase                 | 1.109 | 75.14 | 0.77402 | 22457 P | -1.086 | 25.31 | 0.2332  | 5403  |
| Lass4         | A_51_P296528 | NM_026058    | longevity assurance homolog 4 (S. cerevis   | 1.109 | 77.44 | 0.79696 | 23921 P | -1.037 | 46.3  | 0.65501 | 9916  |
| Sbno1         | A_51_P123805 | XM_355637    | sno, strawberry notch homolog 1 (Drosop     | 1.109 | 72.2  | 0.73047 | 20289 P | 1.113  | 8.32  | 0.06967 | 2388  |
| Ttc5          | A_51_P166325 | BC092074     | tetratricopeptide repeat domain 5           | 1.109 | 72.2  | 0.7471  | 20931 P | -1.228 | 0.56  | 0.01049 | 402   |
| Tubb5         | A_52_P163796 | NM_011655    | tubulin, beta 5                             | 1.109 | 79.26 | 0.8299  | 26056 P | 1.143  | 4.63  | 0.03417 | 1317  |
| Cct6a         | A_52_P363718 | NM_009838    | chaperonin subunit 6a (zeta)                | 1.108 | 81.02 | 0.86893 | 28828 P | 1.13   | 9.71  | 0.16314 | 4273  |
| Dlg5          | A_51_P430817 | AK147699     | discs, large homolog 5 (Drosophila)         | 1.108 | 72.2  | 0.75252 | 21232 P | 1.218  | 6.98  | 0.15718 | 4167  |
| Eefsec        | A_51_P340402 | NM_023060    | eukaryotic elongation factor, selenocyste   | 1.108 | 81.02 | 0.87627 | 29358 P | 1.021  | 38.4  | 0.64449 | 9832  |
| Exosc10       | A_51_P391825 | NM_016699    | exosome component 10                        | 1.108 | 77.44 | 0.82443 | 25668 P | -1.141 | 2.53  | 0.0311  | 1229  |
| Gng12         | A_51_P415688 | NM_025278    | guanine nucleotide binding protein (G pro   | 1.108 | 75.14 | 0.77047 | 22216 P | 1.349  | 2.53  | 0.06194 | 2189  |
| Mxd3          | A_52_P190647 | NM_016662    | Max dimerization protein 3                  | 1.108 | 61.79 | 0.67959 | 17433 P | -1.117 | 11.33 | 0.11939 | 3485  |
| Nfe2l3        | A_52_P423222 | NM_010903    | nuclear factor, erythroid derived 2, like 3 | 1.108 | 77.44 | 0.79709 | 23931 P | 1.108  | 13.58 | 0.22756 | 5324  |
| Nup35         | A_51_P259230 | NM_027091    | nucleoporin 35                              | 1.108 | 77.44 | 0.80609 | 24469 P | 1.133  | 6.98  | 0.07614 | 2559  |
| Rnf7          | A_52_P43111  | NM_011279    | ring finger protein 7                       | 1.108 | 72.2  | 0.74535 | 20863 P | 1.112  | 9.71  | 0.12367 | 3571  |
| Zfp655        | A_52_P257665 | NM_028298    | zinc finger protein 655                     | 1.108 | 72.2  | 0.72841 | 20140 P | -1.076 | 22.1  | 0.1549  | 4127  |
| 6430514L14Rik | A_51_P221510 | NM_029784    | RIKEN cDNA 6430514L14 gene                  | 1.107 | 79.26 | 0.83751 | 26898 P | 1.05   | 22.1  | 0.30281 | 6350  |
| B930006L02Rik | A_52_P285674 | NM_178764    | RIKEN cDNA B930006L02 gene                  | 1.107 | 72.2  | 0.72788 | 20100 P | 1.094  | 16.2  | 0.32199 | 6586  |
| Cox7b         | A_51_P160664 | NM_025379    | cytochrome c oxidase subunit VIIb           | 1.107 | 79.26 | 0.88647 | 21849 M | 1.241  | 4.63  | 0.10068 | 3119  |
| D14Abb1e      | A_52_P182749 | XM_897688    | DNA segment, Chr 14, Abbott 1 expressed     | 1.107 | 77.44 | 0.81746 | 25242 P | 1.097  | 16.2  | 0.33668 | 6747  |
| Foxd3         | A_51_P286423 | NM_010425    | forkhead box D3                             | 1.107 | 77.44 | 0.79    | 23455 P | 1.008  | 42.43 | 0.88416 | 11906 |
| Lgals8        | A_51_P316981 | NM_018886    | lectin, galactose binding, soluble 8        | 1.107 | 77.44 | 0.82214 | 25538 P | 1.03   | 36.07 | 0.67113 | 10061 |
| Rap2b         | A_52_P368384 | NM_028712    | RAP2B, member of RAS oncogene family        | 1.107 | 82.34 | 0.90463 | 31409 P | 1.056  | 22.1  | 0.27384 | 6007  |
| Spnb2         | A_52_P492856 | NM_175836    | spectrin beta 2                             | 1.107 | 69.29 | 0.71296 | 19100 P | 1.12   | 13.58 | 0.28592 | 6167  |
| Tfam          | A_52_P351785 | NM_009360    | transcription factor A, mitochondrial       | 1.107 | 77.44 | 0.8176  | 25257 P | 1.01   | 42.43 | 0.86219 | 11697 |
| Zbed4         | A_51_P199832 | NM_181412    | zinc finger, BED domain containing 4        | 1.107 | 81.02 | 0.90137 | 31065 M | 1.142  | 6.98  | 0.08375 | 2749  |
| 6720468P15Rik | A_52_P667066 | AK078497     | RIKEN cDNA 6720468P15 gene                  | 1.106 | 72.2  | 0.73001 | 20240 P | -1.178 | 1.1   | 0.01529 | 649   |
| Clcn1         | A_52_P516878 | NM_013491    | chloride channel 1                          | 1.106 | 72.2  | 0.76762 | 19762 M | 1.127  | 9.71  | 0.18151 | 4603  |
| Gata4         | A_51_P492355 | NM_008092    | GATA binding protein 4                      | 1.106 | 72.2  | 0.75    | 21069 P | 1.052  | 28.13 | 0.55083 | 9038  |
| Gnl2          | A_51_P161362 | NM_145552    | guanine nucleotide binding protein-like 2   | 1.106 | 79.26 | 0.83872 | 27016 P | -1.003 | 49.48 | 0.97107 | 12756 |



|               |              |              |                                               |       |       |         |         |        |       |         |       |
|---------------|--------------|--------------|-----------------------------------------------|-------|-------|---------|---------|--------|-------|---------|-------|
| Mrps18b       | A_52_P207964 | NM_025878    | mitochondrial ribosomal protein S18B          | 1.106 | 81.02 | 0.90183 | 31137 P | 1.09   | 11.33 | 0.12993 | 3685  |
| Mylc2b        | A_52_P222888 | NM_023402    | myosin light chain, regulatory B              | 1.106 | 81.02 | 0.89568 | 22257 M | 1.207  | 2.53  | 0.02523 | 1043  |
| Rdx           | A_52_P571684 | NM_009041    | radixin                                       | 1.106 | 77.44 | 0.80275 | 24220 P | 1.136  | 9.71  | 0.20644 | 4989  |
| Rnf11         | A_51_P268117 | NM_013876    | ring finger protein 11                        | 1.106 | 72.2  | 0.75205 | 21179 P | 1.11   | 8.32  | 0.07279 | 2473  |
| Tgfb2         | A_52_P3811   | AK090393     | transforming growth factor, beta receptor     | 1.106 |       | 0.9189  | 17454 A | -1.054 | 38.4  | 0.29214 | 6238  |
| Tob2          | A_52_P43100  | AK013833     | transducer of ERBB2, 2                        | 1.106 | 77.44 | 0.78594 | 20605 M | 1.05   | 25.31 | 0.3283  | 6653  |
| 4931406C07Rik | A_51_P445683 | NM_133732    | RIKEN cDNA 4931406C07 gene                    | 1.105 | 77.44 | 0.80415 | 24352 P | 1.097  | 8.32  | 0.07277 | 2465  |
| Adh5          | A_51_P404275 | NM_007410    | alcohol dehydrogenase 5 (class III), chi po   | 1.105 | 69.29 | 0.72698 | 20043 P | 1.048  | 22.1  | 0.27    | 5951  |
| Cbx1          | A_51_P495012 | NM_007622    | chromobox homolog 1 (Drosophila HP1 b         | 1.105 | 77.44 | 0.79655 | 23908 P | 1.062  | 19.02 | 0.21209 | 5074  |
| Cox7c         | A_52_P136153 | NM_007749    | cytochrome c oxidase, subunit VIIC            | 1.105 | 75.14 | 0.78613 | 23136 P | 1.064  | 22.1  | 0.33368 | 6721  |
| D2Wsu81e      | A_51_P281663 | NM_172660    | DNA segment, Chr 2, Wayne State Univer        | 1.105 | 75.14 | 0.7888  | 23375 P | 1.016  | 42.43 | 0.86316 | 11707 |
| Dscr2         | A_51_P421950 | NM_019537    | Down syndrome critical region homolog 2       | 1.105 | 75.14 | 0.76183 | 21742 P | 1.061  | 25.31 | 0.4138  | 7664  |
| Dusp1         | A_51_P430900 | NM_013642    | dual specificity phosphatase 1                | 1.105 | 82.34 | 0.91591 | 23382 M | 1.061  | 22.1  | 0.3102  | 6450  |
| Isl1          | A_52_P337246 | NM_021459    | ISL1 transcription factor, LIM/homeodom       | 1.105 | 77.44 | 0.86471 | 20972 M | 1.161  | 4.63  | 0.04045 | 1541  |
| Ppm1d         | A_51_P131526 | NM_016910    | protein phosphatase 1D magnesium-depe         | 1.105 | 82.34 | 0.92269 | 33251 P | -1.013 | 49.48 | 0.77933 | 10983 |
| Sap18         | A_51_P386031 | NM_009119    | Sin3-associated polypeptide 18                | 1.105 | 77.44 | 0.82556 | 25723 P | -1.043 | 44.4  | 0.48701 | 8408  |
| Sdhb          | A_51_P234853 | NM_023374    | succinate dehydrogenase complex, subun        | 1.105 | 81.02 | 0.86117 | 28304 P | -1.262 | 0.56  | 0.01141 | 445   |
| Wap           | A_51_P407705 | NM_011709    | whey acidic protein                           | 1.105 |       | 0.8977  | 19526 A | 1.088  | 11.33 | 0.10965 | 3257  |
| 0610008C08Rik | A_51_P265685 | NM_026673    | RIKEN cDNA 0610008C08 gene                    | 1.104 | 72.2  | 0.75435 | 21346 P | 1.131  | 16.2  | 0.33175 | 7415  |
| 1810022K09Rik | A_52_P5394   | BC045157     | RIKEN cDNA 1810022K09 gene                    | 1.104 | 79.26 | 0.87393 | 21352 M | 1.078  | 16.2  | 0.2404  | 5494  |
| Arnt2         | A_52_P260696 | NM_007488    | aryl hydrocarbon receptor nuclear trans       | 1.104 | 82.34 | 0.91363 | 32392 P | 1.057  | 22.1  | 0.29516 | 6275  |
| Hdgfrp2       | A_51_P400773 | NM_008233    | hepatoma-derived growth factor, related       | 1.104 | 79.26 | 0.83302 | 26334 P | 1.049  | 22.1  | 0.28546 | 6157  |
| Hrbl          | A_51_P496074 | NM_178162    | HIV-1 Rev binding protein-like                | 1.104 | 72.2  | 0.73986 | 20615 P | -1.015 | 49.48 | 0.72759 | 10547 |
| Ky            | A_51_P334190 | AJ293727     | kyphoscoliosis peptidase                      | 1.104 | 83.36 | 0.85918 | 22449 M | 1.073  | 16.2  | 0.20269 | 4939  |
| Psmb7         | A_51_P468329 | NM_011187    | proteasome (prosome, macropain) subun         | 1.104 | 77.44 | 0.85913 | 20769 M | 1.139  | 9.71  | 0.17942 | 4559  |
| Pycl1         | A_51_P482844 | AK004291     | pyrroline-5-carboxylate reductase-like        | 1.104 | 79.26 | 0.84478 | 27380 P | 1.027  | 33.49 | 0.53861 | 8927  |
| Sh3glb1       | A_52_P218100 | AK086477     | SH3-domain GRB2-like B1 (endophilin)          | 1.104 | 81.02 | 0.89072 | 30281 P | 1.129  | 6.98  | 0.07509 | 2536  |
| Slc39a6       | A_51_P259214 | NM_139143    | solute carrier family 39 (metal ion transp    | 1.104 | 75.14 | 0.78103 | 22813 P | 1.023  | 38.4  | 0.72706 | 10536 |
| St6galnac4    | A_52_P449104 | NM_011373    | ST6 (alpha-N-acetyl-neuraminyl-2,3-beta-      | 1.104 | 82.34 | 0.90374 | 31367 P | 1.1    | 11.33 | 0.12491 | 3603  |
| Crsp2         | A_51_P281134 | AB019028     | cofactor required for Sp1 transcriptional a   | 1.103 | 81.02 | 0.87393 | 29170 P | -1.017 | 49.48 | 0.78354 | 11038 |
| D10Ertd641e   | A_52_P550684 | AK037565     | DNA segment, Chr 10, ERATO Doi 641, ex        | 1.103 | 79.26 | 0.83273 | 26307 P | 1.025  | 38.4  | 0.7248  | 10520 |
| Eif2s1        | A_51_P448340 | NM_026114    | eukaryotic translation initiation factor 2, s | 1.103 | 79.26 | 0.83342 | 26362 P | 1.125  | 5.75  | 0.04706 | 1760  |
| Fgd1          | A_52_P428521 | NM_008001    | FYVE, RhoGEF and PH domain containing         | 1.103 | 77.44 | 0.81874 | 25341 P | -1.187 | 1.62  | 0.03502 | 1346  |
| Ivns1abp      | A_52_P584058 | NM_001039511 | influenza virus NS1A binding protein          | 1.103 | 79.26 | 0.83547 | 26792 P | 1.224  | 2.04  | 0.01529 | 652   |
| Pccb          | A_51_P418259 | NM_025835    | propionyl Coenzyme A carboxylase, beta        | 1.103 | 81.02 | 0.86555 | 28544 P | 1.073  | 22.1  | 0.38497 | 7337  |
| Rhoa          | A_52_P110965 | NM_016802    | ras homolog gene family, member A             | 1.103 | 75.14 | 0.78996 | 23449 P | 1.199  | 2.04  | 0.01584 | 682   |
| Rpl39         | A_51_P139244 | NM_026055    | ribosomal protein L39                         | 1.103 | 81.02 | 0.90183 | 22536 M | 1.056  | 22.1  | 0.34749 | 6842  |
| Uhrf2         | A_52_P531514 | AK031036     | ubiquitin-like, containing PHD and RING f     | 1.103 | 81.02 | 0.8661  | 28570 P | 1.137  | 8.32  | 0.12441 | 3586  |
| Wars2         | A_52_P641477 | NM_027462    | tryptophanyl tRNA synthetase 2 (mitocho       | 1.103 | 79.26 | 0.83789 | 26944 P | 1.017  | 42.43 | 0.8974  | 12035 |
| 0710008K08Rik | A_51_P453167 | NM_026995    | RIKEN cDNA 0710008K08 gene                    | 1.102 | 75.14 | 0.76655 | 22023 P | 1.092  | 11.33 | 0.15103 | 4055  |
| 2410127E16Rik | A_52_P104581 | NM_029741    | RIKEN cDNA 2410127E16 gene                    | 1.102 | 81.02 | 0.89796 | 30805 P | 1.074  | 13.58 | 0.13256 | 3721  |
| Anapc11       | A_52_P238019 | NM_001038230 | anaphase promoting complex subunit 11         | 1.102 | 65.79 | 0.71449 | 19204 P | -1.013 | 49.48 | 0.82646 | 11425 |
| Asns          | A_51_P125745 | NM_012055    | asparagine synthetase                         | 1.102 | 79.26 | 0.88491 | 21799 M | 1.035  | 33.49 | 0.54989 | 9022  |
| Dvl1          | A_52_P234958 | NM_010091    | dishevelled, dsh homolog 1 (Drosophila)       | 1.102 | 82.34 | 0.91033 | 31989 P | -1.043 | 44.4  | 0.49099 | 8451  |
| Ext2          | A_51_P221801 | NM_010163    | exostosins (multiple) 2                       | 1.102 | 79.26 | 0.83927 | 27060 P | 1.133  | 5.75  | 0.05211 | 1920  |
| Hadhb         | A_51_P217990 | NM_145558    | hydroxyacyl-Coenzyme A dehydrogenase,         | 1.102 | 77.44 | 0.82494 | 25694 P | -1.04  | 45.05 | 0.55846 | 9089  |
| Mrpl51        | A_52_P24160  | NM_025595    | mitochondrial ribosomal protein L51           | 1.102 | 77.44 | 0.79823 | 23999 P | 1.003  | 42.43 | 0.94873 | 12568 |
| Nup62         | A_51_P190277 | NM_053074    | nucleoporin 62                                | 1.102 | 69.29 | 0.71937 | 19471 P | 1.14   | 3.82  | 0.02789 | 1120  |
| Pbxip1        | A_51_P146850 | NM_146131    | pre-B-cell leukemia transcription factor in   | 1.102 | 81.02 | 0.86173 | 28336 P | 1.075  | 13.58 | 0.15225 | 4068  |
| Pcbp2         | A_52_P635718 | NM_011042    | poly(rC) binding protein 2                    | 1.102 | 75.14 | 0.76844 | 22140 P | 1.149  | 5.75  | 0.05908 | 2110  |
| Pelo          | A_51_P175555 | NM_134058    | pelota homolog (Drosophila)                   | 1.102 | 77.44 | 0.81406 | 24985 P | 1.048  | 25.31 | 0.3303  | 6670  |
| Sqle          | A_51_P450487 | NM_009270    | squalene epoxidase                            | 1.102 | 72.2  | 0.75215 | 21185 P | 1.009  | 42.43 | 0.8679  | 11743 |
| Tnpo3         | A_52_P100042 | AK045143     | transportin 3                                 | 1.102 | 75.14 | 0.7763  | 22543 P | 1.112  | 9.71  | 0.11996 | 3492  |

|               |              |              |                                           |       |       |         |         |        |       |         |       |
|---------------|--------------|--------------|-------------------------------------------|-------|-------|---------|---------|--------|-------|---------|-------|
| Ttc14         | A_51_P101719 | NM_025978    | tetratricopeptide repeat domain 14        | 1.102 | 81.02 | 0.86033 | 28239 P | -1.032 | 46.3  | 0.62104 | 9633  |
| Tusc4         | A_52_P59457  | NM_018879    | tumor suppressor candidate 4              | 1.102 | 82.34 | 0.90848 | 31699 P | -1.182 | 2.04  | 0.04486 | 1668  |
| Wwox          | A_52_P406141 | AK083096     | WW domain-containing oxidoreductase       | 1.102 | 77.44 | 0.79111 | 23501 P | 1.059  | 19.02 | 0.23591 | 5429  |
| Ankrd32       | A_52_P328128 | AK086347     | ankyrin repeat domain 32                  | 1.101 | 82.34 | 0.909   | 31788 P | 1.05   | 22.1  | 0.26773 | 5909  |
| D19Wsu162e    | A_51_P496598 | NM_146099    | DNA segment, Chr 19, Wayne State Unive    | 1.101 | 79.26 | 0.85903 | 28164 P | 1.002  | 42.43 | 0.97003 | 12744 |
| Gnb5          | A_51_P185259 | NM_010313    | guanine nucleotide binding protein, beta  | 1.101 | 72.2  | 0.75724 | 21493 P | -1.254 | 0.66  | 0.01227 | 499   |
| Hip1          | A_52_P11174  | AK147269     | huntingtin interacting protein 1          | 1.101 | 77.44 | 0.7912  | 23540 P | -1.107 | 16.2  | 0.1601  | 4216  |
| Hnrpc         | A_52_P596080 | AK088678     | heterogeneous nuclear ribonucleoprotein   | 1.101 | 77.44 | 0.86773 | 21120 M | 1.129  | 4.63  | 0.03839 | 1459  |
| Ier3ip1       | A_52_P445324 | NM_025409    | immediate early response 3 interacting p  | 1.101 | 72.2  | 0.74032 | 20641 P | -1.001 | 49.48 | 0.99345 | 13008 |
| Mastl         | A_52_P996341 | BC086483     | microtubule associated serine/threonine   | 1.101 | 81.02 | 0.88507 | 29980 P | 1.042  | 30.75 | 0.55007 | 9025  |
| Mrpl38        | A_52_P262997 | AK013126     | mitochondrial ribosomal protein L38       | 1.101 | 82.34 | 0.90137 | 31066 P | 1.102  | 11.33 | 0.14582 | 3959  |
| Pecam1        | A_52_P349070 | AK031380     | platelet/endothelial cell adhesion molecu | 1.101 |       | 0.89894 | 19611 A | -1.031 | 49    | 0.81997 | 11357 |
| Psmc1         | A_51_P104960 | NM_008947    | protease (prosome, macropain) 26S subu    | 1.101 | 77.44 | 0.7912  | 23547 P | -1.148 | 2.04  | 0.03012 | 1200  |
| Snai1         | A_51_P165087 | NM_011427    | snail homolog 1 (Drosophila)              | 1.101 | 82.34 | 0.90596 | 31512 P | -1.151 | 3.46  | 0.04748 | 1780  |
| Tnf           | A_51_P385099 | NM_013693    | tumor necrosis factor                     | 1.101 | 79.26 | 0.82788 | 25879 P | 1.042  | 28.13 | 0.3949  | 7458  |
| Ube2e3        | A_52_P174962 | AK043446     | ubiquitin-conjugating enzyme E2E 3, UBC   | 1.101 | 82.34 | 0.9153  | 32614 M | 1.008  | 42.43 | 0.89646 | 12024 |
| Vax2          | A_51_P310348 | NM_011912    | ventral anterior homeobox containing ge   | 1.101 |       | 0.92079 | 17531 A | 1.045  | 22.1  | 0.29288 | 6251  |
| 1700020114Rik | A_52_P500741 | AK147270     | RIKEN cDNA 1700020114 gene                | 1.1   | 82.34 | 0.9036  | 31340 P | -1.103 | 6.98  | 0.06573 | 2301  |
| 4930455F23Rik | A_51_P190437 | NM_029115    | RIKEN cDNA 4930455F23 gene                | 1.1   | 75.14 | 0.77139 | 22334 P | -1.01  | 49.48 | 0.9007  | 12080 |
| 6330416L07Rik | A_51_P233308 | NM_176962    | RIKEN cDNA 6330416L07 gene                | 1.1   | 75.14 | 0.76814 | 22112 P | -1.136 | 3.46  | 0.04529 | 1698  |
| Cobl1         | A_52_P631356 | NM_177025    | Cobl-like 1                               | 1.1   | 77.44 | 0.82083 | 25437 P | -1.337 | 1.32  | 0.09017 | 2898  |
| Hmgb1         | A_52_P323044 | NM_010439    | high mobility group box 1                 | 1.1   | 77.44 | 0.79372 | 23729 P | -1.033 | 49.22 | 0.83907 | 11522 |
| Mafb          | A_52_P495869 | NM_010658    | v-maf musculoaponeurotic fibrosarcoma     | 1.1   | 83.36 | 0.94613 | 24702 M | 1.357  | 1.32  | 0.02177 | 918   |
| Myh3          | A_51_P167668 | XM_354614    | myosin, heavy polypeptide 3, skeletal mu  | 1.1   |       | 0.90299 | 19969 A | 1.054  | 25.31 | 0.39103 | 7411  |
| Notch3        | A_51_P220162 | NM_008716    | Notch gene homolog 3 (Drosophila)         | 1.1   | 81.02 | 0.87476 | 29234 P | 1.056  | 28.13 | 0.49031 | 8432  |
| Smarcc1       | A_51_P502184 | NM_009211    | SWI/SNF related, matrix associated, actin | 1.1   | 77.44 | 0.80132 | 24146 P | -1.06  | 33.49 | 0.21827 | 5172  |
| St6galnac2    | A_52_P577819 | AK136381     | ST6 (alpha-N-acetylneuraminyl-2,3-beta-   | 1.1   |       | 0.89438 | 22033 A | -1.224 | 0.75  | 0.01427 | 598   |
| Ccpg1         | A_52_P668146 | NM_028181    | cell cycle progression 1                  | 1.099 | 79.26 | 0.83233 | 26238 P | 1.103  | 11.33 | 0.17381 | 4444  |
| Crbn          | A_52_P424871 | NM_175357    | cereblon                                  | 1.099 | 82.34 | 0.90075 | 31025 P | 1.063  | 19.02 | 0.28832 | 6190  |
| D030051N19Rik | A_51_P141180 | AK083596     | RIKEN cDNA D030051N19 gene                | 1.099 | 77.44 | 0.81316 | 24927 P | 1.06   | 19.02 | 0.21806 | 5168  |
| Mat2b         | A_52_P288811 | NM_134017    | methionine adenosyltransferase II, beta   | 1.099 | 75.14 | 0.7912  | 23522 P | 1.232  | 3.46  | 0.04965 | 1838  |
| Mrpl17        | A_52_P273929 | NM_025301    | mitochondrial ribosomal protein L17       | 1.099 | 69.29 | 0.73865 | 20578 P | -1.011 | 49.48 | 0.81635 | 11339 |
| Mrps31        | A_51_P319732 | NM_020560    | mitochondrial ribosomal protein S31       | 1.099 | 79.26 | 0.83788 | 26934 P | -1.04  | 43.15 | 0.37494 | 7223  |
| Nnp1          | A_51_P452352 | NM_010925    | ribosomal RNA processing 1 homolog (S.    | 1.099 | 69.29 | 0.72464 | 19999 P | 1.103  | 8.32  | 0.0745  | 2519  |
| Nup160        | A_52_P157037 | NM_021512    | nucleoporin 160                           | 1.099 | 77.44 | 0.90714 | 27382 M | -1.098 | 9.71  | 0.07782 | 2597  |
| Rab2          | A_52_P303928 | NM_021518    | RAB2, member RAS oncogene family          | 1.099 | 72.2  | 0.83461 | 19770 M | 1.073  | 16.2  | 0.22576 | 5283  |
| Rhoq          | A_51_P338317 | NM_145491    | ras homolog gene family, member Q         | 1.099 | 77.44 | 0.80592 | 24465 P | 1.106  | 9.71  | 0.12486 | 3602  |
| Tpp2          | A_52_P488720 | AK040859     | tripeptidyl peptidase II                  | 1.099 | 81.02 | 0.86033 | 28251 P | 1.108  | 13.58 | 0.25735 | 5770  |
| Zfp69         | A_52_P478550 | NM_001005788 | zinc finger protein 69                    | 1.099 | 79.26 | 0.83448 | 26506 P | 1.07   | 13.58 | 0.13908 | 3830  |
| 1700017B05Rik | A_51_P268131 | AK029230     | RIKEN cDNA 1700017B05 gene                | 1.098 | 83.36 | 0.92982 | 23767 M | -1.296 | 0.51  | 0.00805 | 300   |
| A130038J17Rik | A_52_P225856 | AK038150     | RIKEN cDNA A130038J17 gene                | 1.098 | 82.34 | 0.91371 | 32411 P | 1.268  | 1.58  | 0.0155  | 661   |
| Crkl          | A_51_P350843 | NM_007764    | v-crk sarcoma virus CT10 oncogene homc    | 1.098 | 77.44 | 0.80717 | 24530 P | 1.052  | 22.1  | 0.25361 | 5711  |
| Hmga2         | A_51_P288315 | NM_010441    | high mobility group AT-hook 2             | 1.098 | 81.02 | 0.86431 | 28462 P | 1.151  | 4.63  | 0.04375 | 1635  |
| Klhl12        | A_51_P311091 | NM_153128    | kelch-like 12 (Drosophila)                | 1.098 | 75.14 | 0.78992 | 23434 P | -1.094 | 16.2  | 0.14183 | 3881  |
| Lmo7          | A_52_P299446 | XM_895740    | LIM domain only 7                         | 1.098 | 72.2  | 0.74032 | 20645 P | -1.05  | 40.63 | 0.35133 | 6892  |
| Pik3r1        | A_51_P511236 | NM_001077495 | phosphatidylinositol 3-kinase, regulatory | 1.098 | 79.26 | 0.85638 | 28066 P | 1.073  | 22.1  | 0.40819 | 7595  |
| Shmt1         | A_52_P673499 | NM_009171    | serine hydroxymethyltransferase 1 (solub  | 1.098 |       | 0.94205 | 18045 A | 1.06   | 16.2  | 0.19509 | 4817  |
| Tomm7         | A_52_P206547 | NM_025394    | translocase of outer mitochondrial memt   | 1.098 | 77.44 | 0.81815 | 25307 P | -1.012 | 49.48 | 0.84183 | 11536 |
| Aprt          | A_52_P594768 | NM_009698    | adenine phosphoribosyl transferase        | 1.097 | 75.14 | 0.78051 | 22805 P | -1.193 | 0.75  | 0.01232 | 500   |
| Atp5a1        | A_52_P674489 | NM_007505    | ATP synthase, H+ transporting, mitochon   | 1.097 | 75.14 | 0.84953 | 20485 M | 1.285  | 1.17  | 0.01266 | 534   |
| Fyco1         | A_51_P158216 | NM_148925    | FYVE and coiled-coil domain containing 1  | 1.097 | 77.44 | 0.82024 | 25424 P | -1.04  | 43.75 | 0.41446 | 7669  |
| Insig2        | A_52_P113250 | NM_178082    | insulin induced gene 2                    | 1.097 | 81.02 | 0.87393 | 29161 P | 1.18   | 9.71  | 0.22538 | 5278  |
| Kars          | A_51_P154222 | NM_053092    | lysyl-tRNA synthetase                     | 1.097 | 79.26 | 0.83817 | 26958 P | 1.045  | 25.31 | 0.3817  | 7298  |

|               |              |              |                                             |       |       |         |         |        |       |         |       |
|---------------|--------------|--------------|---------------------------------------------|-------|-------|---------|---------|--------|-------|---------|-------|
| Lyar          | A_51_P452189 | NM_025281    | Ly1 antibody reactive clone                 | 1.097 | 81.02 | 0.8925  | 30447 P | 1.076  | 16.2  | 0.19049 | 4742  |
| Maz           | A_52_P673304 | NM_010772    | MYC-associated zinc finger protein (purin   | 1.097 | 69.29 | 0.72992 | 20224 M | -1.072 | 33.49 | 0.28324 | 6122  |
| Ndufs4        | A_51_P388696 | NM_010887    | NADH dehydrogenase (ubiquinone) Fe-S        | 1.097 | 79.26 | 0.8368  | 26871 P | 1.102  | 16.2  | 0.31073 | 6464  |
| Srp14         | A_51_P111544 | NM_009273    | signal recognition particle 14              | 1.097 | 77.44 | 0.85639 | 20703 M | 1.267  | 1.32  | 0.01222 | 496   |
| Sult1d1       | A_51_P481721 | NM_016771    | sulfotransferase family 1D, member 1        | 1.097 | 82.34 | 0.90935 | 31821 P | -1.045 | 49.48 | 0.88787 | 11938 |
| 1810026B05Rik | A_52_P67463  | AK140938     | RIKEN cDNA 1810026B05 gene                  | 1.096 | 79.26 | 0.84587 | 27462 P | 1.081  | 11.33 | 0.13274 | 3726  |
| 2310076G13Rik | A_51_P429111 | AK010199     | RIKEN cDNA 2310076G13 gene                  | 1.096 | 79.26 | 0.83527 | 26720 P | -1.123 | 6.98  | 0.07777 | 2595  |
| A930008G19Rik | A_51_P374190 | NM_212473    | RIKEN cDNA A930008G19 gene                  | 1.096 | 81.02 | 0.87022 | 28914 P | 1      | 49.48 | 0.99742 | 13030 |
| Apc           | A_52_P675171 | NM_007462    | adenomatosis polyposis coli                 | 1.096 | 72.2  | 0.75683 | 21475 P | 1.069  | 22.1  | 0.37567 | 7229  |
| Atp10a        | A_51_P320022 | NM_009728    | ATPase, class V, type 10A                   | 1.096 | 82.34 | 0.90362 | 31358 M | -1.048 | 42.43 | 0.38401 | 7328  |
| Auh           | A_52_P4095   | AK169661     | AU RNA binding protein/enoyl-coenzyme       | 1.096 | 79.26 | 0.85443 | 27969 P | 1.108  | 6.98  | 0.05213 | 1922  |
| AW146242      | A_51_P338040 | NM_146168    | expressed sequence AW146242                 | 1.096 | 77.44 | 0.80833 | 24608 P | 1.071  | 16.2  | 0.24262 | 5536  |
| Deb1          | A_51_P119715 | NM_026794    | differentially expressed in B16F10 1        | 1.096 | 77.44 | 0.86843 | 21140 M | 1.064  | 22.1  | 0.37323 | 7203  |
| Ebna1bp2      | A_51_P455027 | NM_026932    | EBNA1 binding protein 2                     | 1.096 | 79.26 | 0.84917 | 27686 P | 1.006  | 42.43 | 0.91764 | 12245 |
| Etfp          | A_51_P131084 | NM_145615    | electron transferring flavoprotein, alpha p | 1.096 | 79.26 | 0.84642 | 27523 P | 1.136  | 5.75  | 0.04976 | 1848  |
| Fabp5         | A_51_P387764 | X70100       | fatty acid binding protein 5, epidermal     | 1.096 | 79.26 | 0.83499 | 26697 P | -1.107 | 9.71  | 0.09513 | 3001  |
| Mpst          | A_51_P200529 | NM_138670    | mercaptopyruvate sulfurtransferase          | 1.096 | 81.02 | 0.89022 | 30259 P | 1.01   | 42.43 | 0.83907 | 11520 |
| Ndufa2        | A_51_P384946 | NM_010885    | NADH dehydrogenase (ubiquinone) 1 alpl      | 1.096 | 69.29 | 0.83603 | 19908 M | -1.066 | 42.43 | 0.52537 | 8802  |
| Pja2          | A_52_P420712 | NM_001025309 | pja2, RING-H2 motif containing              | 1.096 | 72.2  | 0.84158 | 20157 M | 1.11   | 9.71  | 0.14105 | 3867  |
| Plxnb2        | A_52_P311068 | BC031202     | plexin B2                                   | 1.096 | 81.02 | 0.86064 | 28263 P | 1.07   | 16.2  | 0.18233 | 4614  |
| Psme2         | A_52_P305289 | NM_011190    | proteasome (prosome, macropain) 28 sul      | 1.096 | 77.44 | 0.79266 | 23652 P | -1.06  | 42.43 | 0.47523 | 8263  |
| Rev3l         | A_51_P271665 | NM_011264    | REV3-like, catalytic subunit of DNA polym   | 1.096 | 81.02 | 0.86086 | 28273 P | 1.029  | 36.07 | 0.68165 | 10150 |
| Rpl36         | A_51_P361875 | NM_018730    | ribosomal protein L36                       | 1.096 | 69.29 | 0.83369 | 19587 M | -1.071 | 40.63 | 0.46054 | 8107  |
| Srp9          | A_52_P321791 | AK003606     | signal recognition particle 9               | 1.096 | 79.26 | 0.85201 | 27869 P | 1.043  | 30.75 | 0.61461 | 9571  |
| Tcf19         | A_51_P505172 | NM_025674    | transcription factor 19                     | 1.096 | 82.34 | 0.91999 | 33032 P | -1.048 | 43.15 | 0.43307 | 7873  |
| 1700041B20Rik | A_51_P263407 | AK028913     | RIKEN cDNA 1700041B20 gene                  | 1.095 | 83.95 | 0.95478 | 35862 P | 1.036  | 30.75 | 0.4643  | 8153  |
| Acdb6         | A_51_P208919 | NM_028250    | acyl-Coenzyme A binding domain contain      | 1.095 | 75.14 | 0.77768 | 22613 P | -1.139 | 4.63  | 0.06647 | 2332  |
| B230219D22Rik | A_52_P75384  | NM_181278    | RIKEN cDNA B230219D22 gene                  | 1.095 | 77.44 | 0.82254 | 25558 P | 1.077  | 13.58 | 0.14569 | 3957  |
| Bcas2         | A_52_P180408 | NM_026602    | breast carcinoma amplified sequence 2       | 1.095 | 81.02 | 0.89861 | 22380 M | 1.103  | 8.32  | 0.06445 | 2262  |
| Bmpr1b        | A_52_P586944 | NM_007560    | bone morphogenetic protein receptor, ty     | 1.095 | 83.36 | 0.94291 | 34802 P | 1.001  | 42.43 | 0.97829 | 12824 |
| Eral1         | A_52_P464096 | AK018664     | Era (G-protein)-like 1 (E. coli)            | 1.095 | 77.44 | 0.8135  | 24945 P | -1.042 | 45.05 | 0.58699 | 9318  |
| Gdpd5         | A_51_P468464 | NM_201352    | glycerophosphodiester phosphodiesteras      | 1.095 | 82.34 | 0.91144 | 32102 P | -1.101 | 28.13 | 0.33845 | 6763  |
| Jmjd2b        | A_51_P410286 | NM_172132    | jumonji domain containing 2B                | 1.095 | 81.02 | 0.89162 | 30356 P | -1.079 | 25.31 | 0.16913 | 4375  |
| Mct1          | A_51_P385749 | NM_026902    | malignant T cell amplified sequence 1       | 1.095 | 77.44 | 0.86047 | 20826 M | 1.091  | 16.2  | 0.27036 | 5962  |
| Psmb2         | A_51_P404084 | NM_011970    | proteasome (prosome, macropain) subun       | 1.095 | 82.34 | 0.91231 | 32219 P | -1.147 | 5.75  | 0.10651 | 3212  |
| Scamp3        | A_51_P482639 | NM_011886    | secretory carrier membrane protein 3        | 1.095 | 79.26 | 0.82999 | 26062 P | -1.01  | 49.48 | 0.89991 | 12066 |
| Snrpe         | A_51_P363634 | NM_009227    | small nuclear ribonucleoprotein E           | 1.095 | 69.29 | 0.74454 | 20821 P | 1.021  | 38.4  | 0.68383 | 10182 |
| Wrrn          | A_52_P478236 | NM_011721    | Werner syndrome homolog (human)             | 1.095 | 79.26 | 0.8356  | 26808 P | 1.044  | 25.31 | 0.33182 | 6701  |
| Ywhae         | A_52_P171715 | NM_009536    | tyrosine 3-monooxygenase/tryptophan 5       | 1.095 | 81.02 | 0.90708 | 22792 M | 1.222  | 1.58  | 0.01057 | 404   |
| 2310047O13Rik | A_51_P429472 | NM_024185    | RIKEN cDNA 2310047O13 gene                  | 1.094 | 77.44 | 0.80336 | 24276 P | -1.124 | 6.98  | 0.08015 | 2664  |
| 3110050N22Rik | A_51_P266546 | NM_173181    | RIKEN cDNA 3110050N22 gene                  | 1.094 | 75.14 | 0.82983 | 21231 M | -1.035 | 46.85 | 0.65776 | 9952  |
| Aldh9a1       | A_51_P106211 | NM_019993    | aldehyde dehydrogenase 9, subfamily A1      | 1.094 | 75.14 | 0.77858 | 22689 P | 1.006  | 42.43 | 0.90768 | 12167 |
| Arpc3         | A_51_P129767 | NM_019824    | actin related protein 2/3 complex, subuni   | 1.094 | 82.34 | 0.89905 | 30925 P | 1.049  | 19.02 | 0.25385 | 5715  |
| Gkap1         | A_51_P459320 | NM_019832    | G kinase anchoring protein 1                | 1.094 | 79.26 | 0.83233 | 26240 P | -1.039 | 43.15 | 0.37794 | 7254  |
| Gna12         | A_52_P647906 | XM_986527    | guanine nucleotide binding protein, alpha   | 1.094 | 81.02 | 0.89437 | 30623 P | 1.071  | 22.1  | 0.38615 | 7348  |
| Hmgcl         | A_51_P308961 | NM_008254    | 3-hydroxy-3-methylglutaryl-Coenzyme A l     | 1.094 | 72.2  | 0.76247 | 21803 P | 1.08   | 19.02 | 0.32595 | 6627  |
| Sfrs11        | A_51_P149818 | NM_026989    | splicing factor, arginine/serine-rich 11    | 1.094 | 82.34 | 0.9087  | 31723 P | 1.162  | 3.01  | 0.01963 | 839   |
| Slmap         | A_52_P679966 | NM_032008    | sarcolemma associated protein               | 1.094 | 75.14 | 0.78304 | 22941 P | 1.041  | 30.75 | 0.4984  | 8567  |
| Suz12         | A_52_P302203 | NM_199196    | suppressor of zeste 12 homolog (Drosoph     | 1.094 | 77.44 | 0.81696 | 25221 P | -1.083 | 28.13 | 0.25393 | 5720  |
| Ubx2          | A_52_P170610 | NM_026390    | UBX domain containing 2                     | 1.094 | 81.02 | 0.86668 | 28630 P | 1.126  | 5.75  | 0.04695 | 1751  |
| Xrn2          | A_52_P404403 | NM_011917    | 5'-3' exoribonuclease 2                     | 1.094 | 81.02 | 0.86882 | 28813 P | 1.034  | 33.49 | 0.55297 | 9052  |
| A830073O21Rik | A_51_P500726 | AK080460     | RIKEN cDNA A830073O21 gene                  | 1.093 | 83.36 | 0.93538 | 34246 P | 1.056  | 22.1  | 0.27356 | 6006  |
| Crry          | A_52_P295129 | AK017702     | complement receptor related protein         | 1.093 | 81.02 | 0.83461 | 24876 M | 1.195  | 2.53  | 0.02152 | 905   |

|               |              |              |                                              |       |       |         |         |        |       |         |       |
|---------------|--------------|--------------|----------------------------------------------|-------|-------|---------|---------|--------|-------|---------|-------|
| Prkcb1        | A_52_P51355  | NM_008855    | protein kinase C, beta 1                     | 1.093 | 69.29 | 0.82344 | 22551 P | 1.176  | 6.98  | 0.11081 | 3288  |
| Psmb4         | A_51_P155522 | NM_008945    | proteasome (prosome, macropain) subunit      | 1.093 | 72.2  | 0.84642 | 20376 M | 1.195  | 3.01  | 0.02628 | 1080  |
| Rala          | A_52_P672740 | NM_019491    | v-ral simian leukemia viral oncogene hom     | 1.093 | 72.2  | 0.76707 | 22034 P | 1.115  | 8.32  | 0.08606 | 2796  |
| Ube2e1        | A_51_P390775 | NM_009455    | ubiquitin-conjugating enzyme E2E 1, UBC      | 1.093 | 72.2  | 0.75297 | 21278 P | 1.113  | 11.33 | 0.15274 | 4084  |
| Usp6nl        | A_51_P442719 | NM_181399    | USP6 N-terminal like                         | 1.093 | 79.26 | 0.82709 | 25853 P | -1.061 | 33.49 | 0.25261 | 5690  |
| Wt1           | A_52_P673458 | NM_144783    | Wilms tumor homolog                          | 1.093 |       | 0.96504 | 14469 A | 1.061  | 16.2  | 0.18027 | 4578  |
| 1500012F01Rik | A_52_P598309 | AK005231     | RIKEN cDNA 1500012F01 gene                   | 1.092 | 77.44 | 0.92376 | 30876 P | -1.045 | 43.15 | 0.3932  | 7439  |
| Cryz1         | A_51_P413193 | NM_133679    | crystallin, zeta (quinone reductase)-like 1  | 1.092 | 77.44 | 0.82228 | 25549 P | 1.175  | 5.75  | 0.09306 | 2966  |
| Ddx27         | A_51_P138772 | AK134274     | DEAD (Asp-Glu-Ala-Asp) box polypeptide       | 1.092 | 77.44 | 0.7964  | 23899 P | -1.017 | 49.48 | 0.76533 | 10896 |
| Dusp7         | A_52_P173197 | NM_153459    | dual specificity phosphatase 7               | 1.092 | 77.44 | 0.79717 | 23950 P | 1.146  | 4.63  | 0.04498 | 1670  |
| Fth1          | A_52_P49601  | NM_010239    | ferritin heavy chain 1                       | 1.092 | 79.26 | 0.88417 | 21755 M | 1.131  | 5.75  | 0.04641 | 1737  |
| Lrpprc        | A_52_P366116 | NM_028233    | leucine-rich PPR-motif containing            | 1.092 | 77.44 | 0.80691 | 24514 P | -1.12  | 4.63  | 0.05039 | 1863  |
| Ndubf5        | A_51_P201904 | NM_025316    | NADH dehydrogenase (ubiquinone) 1 bet        | 1.092 | 79.26 | 0.84505 | 27404 P | 1.073  | 16.2  | 0.25309 | 5699  |
| Neurog3       | A_51_P175784 | NM_009719    | neurogenin 3                                 | 1.092 | 75.14 | 0.78014 | 22761 P | 1.001  | 42.43 | 0.98518 | 12934 |
| Psmd5         | A_51_P455671 | NM_080554    | proteasome (prosome, macropain) 26S su       | 1.092 | 79.26 | 0.84365 | 27299 P | 1.039  | 28.13 | 0.36726 | 7131  |
| Sepp1         | A_51_P470328 | NM_001042614 | selenoprotein P, plasma, 1                   | 1.092 | 83.36 | 0.9386  | 24412 M | 1.388  | 1.58  | 0.03553 | 1378  |
| Stim2         | A_51_P260008 | AK142275     | stromal interaction molecule 2               | 1.092 | 79.26 | 0.83635 | 26829 P | 1.117  | 11.33 | 0.19986 | 4902  |
| Tbrg4         | A_52_P612993 | AK144813     | transforming growth factor beta regulato     | 1.092 | 82.34 | 0.92057 | 33085 P | -1.072 | 30.75 | 0.26157 | 5839  |
| Cabin1        | A_52_P93422  | NM_172549    | calcineurin binding protein 1                | 1.091 | 79.26 | 0.83077 | 26090 M | 1.162  | 4.63  | 0.04205 | 1586  |
| Csnk1g2       | A_51_P297311 | NM_134002    | casein kinase 1, gamma 2                     | 1.091 | 82.34 | 0.90895 | 31776 P | -1.045 | 43.15 | 0.4138  | 7667  |
| Ecm1          | A_52_P154347 | NM_007899    | extracellular matrix protein 1               | 1.091 | 81.02 | 0.88421 | 29925 P | 1.072  | 13.58 | 0.13222 | 3718  |
| F830028O17Rik | A_52_P1067   | AK089821     | RIKEN cDNA F830028O17 gene                   | 1.091 | 81.02 | 0.86322 | 28380 P | -1.059 | 40.63 | 0.36333 | 7065  |
| Glt25d1       | A_52_P346581 | NM_146211    | glycosyltransferase 25 domain containing     | 1.091 | 79.26 | 0.83652 | 26854 P | -1.254 | 0.56  | 0.01062 | 412   |
| Gtf3c4        | A_52_P73214  | NM_172977    | general transcription factor IIIC, polypept  | 1.091 | 82.34 | 0.90015 | 31002 P | 1.079  | 19.02 | 0.29943 | 6307  |
| Ltbp3         | A_52_P652936 | NM_008520    | latent transforming growth factor beta bi    | 1.091 | 77.44 | 0.78753 | 21910 M | 1.083  | 9.71  | 0.09627 | 3019  |
| Nol5          | A_51_P496751 | NM_018868    | nucleolar protein 5                          | 1.091 | 81.02 | 0.89303 | 30507 P | -1.101 | 16.2  | 0.16711 | 4333  |
| Ran           | A_52_P344910 | NM_009391    | RAN, member RAS oncogene family              | 1.091 | 77.44 | 0.8659  | 21012 M | 1.135  | 8.32  | 0.09908 | 3090  |
| Slc30a5       | A_52_P65165  | AK051654     | solute carrier family 30 (zinc transporter), | 1.091 | 81.02 | 0.8711  | 28980 P | 1.131  | 8.32  | 0.11874 | 3456  |
| 1500010J02Rik | A_52_P375918 | AK030876     | RIKEN cDNA 1500010J02 gene                   | 1.09  |       | 0.93315 | 17939 A | -1.102 | 19.02 | 0.1945  | 4810  |
| 4930504E06Rik | A_52_P76899  | NM_133858    | RIKEN cDNA 4930504E06 gene                   | 1.09  | 81.02 | 0.87776 | 29463 M | -1.003 | 49.48 | 0.95081 | 12594 |
| AI585793      | A_52_P424197 | AK033788     | expressed sequence AI585793                  | 1.09  | 72.2  | 0.76328 | 21852 P | 1.042  | 30.75 | 0.52026 | 8754  |
| Dmtf1         | A_51_P405882 | NM_011806    | cyclin D binding myb-like transcription fac  | 1.09  | 79.26 | 0.83384 | 26393 P | -1.015 | 49.48 | 0.82721 | 11430 |
| Ltbp1         | A_52_P189946 | NM_019919    | latent transforming growth factor beta bi    | 1.09  | 79.26 | 0.85581 | 28034 P | 1.024  | 38.4  | 0.76582 | 10901 |
| Mrps11        | A_52_P582394 | NM_026498    | mitochondrial ribosomal protein S11          | 1.09  | 81.02 | 0.88204 | 29793 P | -1.04  | 44.4  | 0.46054 | 8112  |
| Samhd1        | A_52_P136316 | AK128954     | SAM domain and HD domain, 1                  | 1.09  | 79.26 | 0.86155 | 26833 M | 1.07   | 16.2  | 0.17232 | 4411  |
| 2810410M20Rik | A_51_P185103 | NM_024428    | RIKEN cDNA 2810410M20 gene                   | 1.089 | 79.26 | 0.83817 | 26998 P | 1.064  | 16.2  | 0.19264 | 4787  |
| C1s           | A_51_P208793 | NM_144938    | complement component 1, s subcompon          | 1.089 | 81.02 | 0.89123 | 30306 P | -1.073 | 36.07 | 0.37192 | 7190  |
| Criz1         | A_52_P429289 | NM_023054    | charged amino acid rich leucine zipper 1     | 1.089 | 75.14 | 0.78828 | 23301 P | 1.017  | 40.63 | 0.76095 | 10863 |
| Mapk7         | A_51_P359017 | NM_011841    | mitogen activated protein kinase 7           | 1.089 | 82.34 | 0.91612 | 32703 P | -1.001 | 49.48 | 0.9828  | 12884 |
| Mvd           | A_51_P355943 | NM_138656    | mevalonate (diphospho) decarboxylase         | 1.089 | 77.44 | 0.82288 | 25614 P | 1.044  | 25.31 | 0.37128 | 7187  |
| Ugp2          | A_52_P42242  | NM_139297    | UDP-glucose pyrophosphorylase 2              | 1.089 | 81.02 | 0.8711  | 28973 P | 1.223  | 3.46  | 0.04586 | 1719  |
| Abcb10        | A_52_P571431 | AK011569     | ATP-binding cassette, sub-family B (MDR/     | 1.088 | 82.34 | 0.83938 | 25240 M | -1.107 | 19.02 | 0.20159 | 4931  |
| Dnaja2        | A_52_P510706 | NM_019794    | Dnaj (Hsp40) homolog, subfamily A, mem       | 1.088 | 77.44 | 0.80242 | 24179 P | 1.142  | 8.32  | 0.12137 | 3530  |
| Dnm1          | A_52_P66333  | NM_152816    | dynamin 1-like                               | 1.088 | 82.34 | 0.91836 | 32868 P | -1.122 | 3.82  | 0.04696 | 1752  |
| Fts           | A_52_P174313 | NM_010241    | thymoma viral proto-oncogene 1 interact      | 1.088 | 81.02 | 0.8666  | 28621 P | 1.11   | 8.32  | 0.07774 | 2592  |
| Mpi1          | A_51_P393897 | NM_025837    | mannose phosphate isomerase 1                | 1.088 | 81.02 | 0.87354 | 29142 P | 1.019  | 38.4  | 0.64455 | 9840  |
| Pgm2          | A_51_P368074 | NM_028132    | phosphoglucomutase 2                         | 1.088 | 75.14 | 0.79483 | 23816 P | 1.062  | 19.02 | 0.25081 | 5655  |
| Ptpre         | A_52_P235319 | NM_011212    | protein tyrosine phosphatase, receptor ty    | 1.088 | 82.34 | 0.92533 | 33475 P | -1.247 | 0.66  | 0.01267 | 535   |
| Qdpr          | A_51_P506513 | NM_024236    | quinoid dihydropteridine reductase           | 1.088 | 77.44 | 0.80689 | 24504 P | 1.352  | 9.71  | 0.41258 | 7641  |
| Rpl8          | A_51_P165046 | NM_012053    | ribosomal protein L8                         | 1.088 | 72.2  | 0.85396 | 20637 M | 1.001  | 42.43 | 0.98171 | 12873 |
| Sema6c        | A_51_P324251 | NM_011351    | sema domain, transmembrane domain (T         | 1.088 | 75.14 | 0.78613 | 23137 P | -1.151 | 1.32  | 0.02161 | 909   |
| Set           | A_52_P212293 | AK054400     | SET translocation                            | 1.088 |       | 0.93488 | 17986 A | 1.075  | 22.1  | 0.48529 | 8387  |
| Slc23a2       | A_52_P286520 | NM_018824    | solute carrier family 23 (nucleobase trans   | 1.088 | 75.14 | 0.79241 | 23617 P | 1.205  | 3.01  | 0.03116 | 1232  |

|               |              |              |                                             |       |       |         |         |        |       |         |       |
|---------------|--------------|--------------|---------------------------------------------|-------|-------|---------|---------|--------|-------|---------|-------|
| Trim39        | A_52_P601497 | AK053591     | tripartite motif protein 39                 | 1.088 | 79.26 | 0.8299  | 26058 P | -1.235 | 1.18  | 0.02586 | 1064  |
| 2310016C08Rik | A_52_P321150 | NM_023516    | RIKEN cDNA 2310016C08 gene                  | 1.087 | 82.34 | 0.9098  | 31928 P | -1.138 | 8.32  | 0.12097 | 3509  |
| 5430437P03Rik | A_52_P575078 | NM_026636    | RIKEN cDNA 5430437P03 gene                  | 1.087 | 75.14 | 0.7912  | 23543 P | -1.05  | 40.63 | 0.32282 | 6595  |
| BC056474      | A_51_P307062 | NM_001001493 | cDNA sequence BC056474                      | 1.087 | 75.14 | 0.79021 | 23469 P | 1.065  | 19.02 | 0.26484 | 5872  |
| C030011O14Rik | A_51_P339524 | NM_174868    | RIKEN cDNA C030011O14 gene                  | 1.087 | 75.14 | 0.78992 | 23432 P | 1.069  | 19.02 | 0.34167 | 6789  |
| Cbx2          | A_51_P300245 | NM_007623    | chromobox homolog 2 (Drosophila Pc cl       | 1.087 | 77.44 | 0.81096 | 23405 M | -1.313 | 0.51  | 0.01227 | 435   |
| Cdk2          | A_52_P651298 | NM_016756    | cyclin-dependent kinase 2                   | 1.087 |       | 0.93771 | 18078 A | -1.196 | 1.18  | 0.02243 | 947   |
| Hoxa3         | A_52_P447935 | NM_010452    | homeo box A3                                | 1.087 | 82.34 | 0.83334 | 23092 M | 1.035  | 30.75 | 0.42434 | 7772  |
| Myadm         | A_52_P645589 | AK159160     | myeloid-associated differentiation marke    | 1.087 | 79.26 | 0.84158 | 27189 P | -1.218 | 1.1   | 0.01893 | 795   |
| Nubp1         | A_51_P123077 | NM_011955    | nucleotide binding protein 1                | 1.087 | 79.26 | 0.83461 | 26612 P | 1.019  | 40.63 | 0.78537 | 11051 |
| Pax5          | A_51_P122855 | NM_008782    | paired box gene 5                           | 1.087 | 72.2  | 0.82118 | 22411 M | -1.037 | 45.68 | 0.57127 | 9204  |
| Pck2          | A_52_P21659  | NM_028994    | phosphoenolpyruvate carboxykinase 2 (m      | 1.087 | 79.26 | 0.83558 | 26804 P | 1.081  | 13.58 | 0.13943 | 3838  |
| Plk2          | A_51_P290576 | NM_152804    | polo-like kinase 2 (Drosophila)             | 1.087 | 79.26 | 0.8447  | 27367 P | 1.256  | 1.1   | 0.00755 | 275   |
| Pmpcb         | A_51_P151038 | NM_028431    | peptidase (mitochondrial processing) bet    | 1.087 | 81.02 | 0.87727 | 29415 P | -1.208 | 0.75  | 0.01189 | 473   |
| Rnf167        | A_51_P364328 | AK075579     | ring finger protein 167                     | 1.087 | 79.26 | 0.83045 | 26078 P | 1.095  | 9.71  | 0.10343 | 3178  |
| Stx18         | A_51_P147964 | NM_026959    | syntaxin 18                                 | 1.087 | 75.14 | 0.79138 | 23552 P | -1.125 | 2.53  | 0.03417 | 1315  |
| Cyp21a1       | A_52_P594116 | NM_009995    | cytochrome P450, family 21, subfamily a,    | 1.086 | 75.14 | 0.81271 | 21916 M | -1.033 | 45.05 | 0.49722 | 8547  |
| Dhx33         | A_52_P286342 | NM_178367    | DEAH (Asp-Glu-Ala-His) box polypeptide 3    | 1.086 | 81.02 | 0.89351 | 30543 P | 1.131  | 9.71  | 0.19672 | 4848  |
| Eif4a2        | A_52_P344376 | NM_013506    | eukaryotic translation initiation factor 4A | 1.086 | 82.34 | 0.91805 | 32804 P | 1.025  | 36.07 | 0.59305 | 9366  |
| Sod2          | A_51_P172573 | NM_013671    | superoxide dismutase 2, mitochondrial       | 1.086 | 75.14 | 0.78021 | 22775 P | 1.013  | 42.43 | 0.85137 | 11601 |
| Abca3         | A_51_P427317 | NM_013855    | ATP-binding cassette, sub-family A (ABC1)   | 1.085 | 65.79 | 0.80911 | 21745 M | 1.002  | 42.43 | 0.96261 | 12687 |
| Anxa6         | A_51_P231979 | NM_013472    | annexin A6                                  | 1.085 | 79.26 | 0.85201 | 27863 P | 1.131  | 5.75  | 0.04067 | 1549  |
| Cdc42         | A_52_P259214 | L78075       | cell division cycle 42 homolog (S. cerevisi | 1.085 | 81.02 | 0.87616 | 29340 P | 1.046  | 30.75 | 0.62666 | 9687  |
| Ddx24         | A_51_P277389 | NM_020494    | DEAD (Asp-Glu-Ala-Asp) box polypeptide      | 1.085 | 79.26 | 0.83883 | 27029 P | 1.021  | 40.63 | 0.81451 | 11323 |
| Fabp4         | A_52_P564544 | NM_024406    | fatty acid binding protein 4, adipocyte     | 1.085 | 82.34 | 0.89818 | 30823 P | -1.094 | 40.63 | 0.59149 | 9341  |
| Map1lc3a      | A_51_P464981 | NM_025735    | microtubule-associated protein 1 light ch   | 1.085 | 81.02 | 0.89029 | 30261 P | 1.032  | 33.49 | 0.54783 | 9005  |
| Mc3r          | A_51_P467278 | NM_008561    | melanocortin 3 receptor                     | 1.085 | 77.44 | 0.83448 | 23198 M | -1.255 | 2.53  | 0.10735 | 3225  |
| PsmA4         | A_52_P81468  | NM_011966    | proteasome (prosome, macropain) subun       | 1.085 | 82.34 | 0.90138 | 31083 P | 1.123  | 8.32  | 0.07873 | 2620  |
| Vdac2         | A_51_P162253 | NM_011695    | voltage-dependent anion channel 2           | 1.085 | 81.02 | 0.89812 | 22352 M | 1.235  | 1.32  | 0.00979 | 365   |
| Zfp64         | A_52_P626780 | BC004695     | zinc finger protein 64                      | 1.085 | 77.44 | 0.81316 | 24933 P | -1.223 | 0.51  | 0.00875 | 319   |
| 1300012G16Rik | A_52_P370311 | NM_023625    | RIKEN cDNA 1300012G16 gene                  | 1.084 | 83.36 | 0.93906 | 34503 P | -1.356 | 0.51  | 0.00591 | 109   |
| Adam10        | A_51_P406115 | NM_007399    | a disintegrin and metallopeptidase domai    | 1.084 | 77.44 | 0.81904 | 25358 P | 1.108  | 11.33 | 0.19231 | 4781  |
| Atp5j2        | A_51_P224216 | NM_020582    | ATP synthase, H+ transporting, mitochon     | 1.084 | 77.44 | 0.8711  | 21254 M | 1.006  | 42.43 | 0.90021 | 12075 |
| Chd4          | A_52_P298043 | NM_145979    | chromodomain helicase DNA binding pro       | 1.084 | 79.26 | 0.85201 | 27871 P | 1.201  | 2.04  | 0.01485 | 638   |
| Chordc1       | A_52_P637199 | NM_025844    | cysteine and histidine-rich domain (CHOR    | 1.084 | 82.34 | 0.89913 | 30930 P | -1.012 | 49.48 | 0.94037 | 12484 |
| Ddx18         | A_51_P235291 | NM_025860    | DEAD (Asp-Glu-Ala-Asp) box polypeptide      | 1.084 | 81.02 | 0.86362 | 28437 P | 1.01   | 42.43 | 0.90417 | 12135 |
| Dnajc2        | A_52_P533198 | NM_009584    | Dnaj (Hsp40) homolog, subfamily C, mem      | 1.084 | 81.02 | 0.88204 | 29796 P | -1.073 | 30.75 | 0.26817 | 5918  |
| Dock7         | A_51_P141110 | NM_026082    | dedicator of cytokinesis 7                  | 1.084 | 81.02 | 0.88339 | 29869 P | 1.259  | 1.62  | 0.01974 | 840   |
| Hnf4a         | A_52_P69656  | NM_008261    | hepatic nuclear factor 4, alpha             | 1.084 |       | 0.91937 | 20654 A | 1.184  | 6.98  | 0.14014 | 3857  |
| PsmA2         | A_51_P415945 | NM_008944    | proteasome (prosome, macropain) subun       | 1.084 | 81.02 | 0.89008 | 30251 P | 1.081  | 13.58 | 0.16704 | 4331  |
| Sparc         | A_52_P101852 | NM_009242    | secreted acidic cysteine rich glycoprotein  | 1.084 | 81.02 | 0.88993 | 30242 P | 1.359  | 2.04  | 0.04945 | 1828  |
| 4933434E20Rik | A_52_P467128 | NM_027500    | RIKEN cDNA 4933434E20 gene                  | 1.083 | 77.44 | 0.82564 | 25730 P | 1.11   | 16.2  | 0.33018 | 6665  |
| Baz1b         | A_51_P463828 | NM_011714    | bromodomain adjacent to zinc finger dom     | 1.083 | 81.02 | 0.85727 | 28093 P | 1.185  | 3.01  | 0.02439 | 1004  |
| Chuk          | A_51_P223475 | NM_007700    | conserved helix-loop-helix ubiquitous kin   | 1.083 | 77.44 | 0.8256  | 25724 P | 1.084  | 13.58 | 0.15353 | 4103  |
| D4Erttd22e    | A_51_P503696 | NM_001025608 | DNA segment, Chr 4, ERATO Doi 22, expre     | 1.083 | 82.34 | 0.915   | 32488 P | -1.032 | 45.68 | 0.54024 | 8949  |
| Fbxw9         | A_51_P155556 | BC002276     | F-box and WD-40 domain protein 9            | 1.083 | 81.02 | 0.88181 | 29776 P | 1.202  | 2.53  | 0.02195 | 932   |
| lkbkap        | A_51_P114878 | NM_026079    | inhibitor of kappa light polypeptide enh    | 1.083 | 77.44 | 0.82196 | 25488 P | 1.22   | 3.82  | 0.06242 | 2207  |
| Mbnl1         | A_52_P228437 | AK088871     | muscleblind-like 1 (Drosophila)             | 1.083 | 81.02 | 0.85689 | 28090 P | 1.069  | 25.31 | 0.51223 | 8694  |
| Nubp2         | A_51_P490171 | NM_011956    | nucleotide binding protein 2                | 1.083 | 81.02 | 0.86052 | 28257 P | -1.099 | 8.32  | 0.07062 | 2412  |
| Ptp4a2        | A_52_P585448 | NM_008974    | protein tyrosine phosphatase 4a2            | 1.083 | 79.26 | 0.85451 | 27976 P | 1.035  | 36.07 | 0.73073 | 10577 |
| Sgta          | A_51_P346104 | NM_024499    | small glutamine-rich tetratricopeptide re   | 1.083 | 82.34 | 0.89647 | 30732 P | -1.191 | 1.18  | 0.01663 | 718   |
| Snap25        | A_52_P286421 | NM_011428    | synaptosomal-associated protein 25          | 1.083 | 82.34 | 0.92017 | 23614 M | 1.247  | 3.82  | 0.0971  | 3040  |
| Usp14         | A_52_P276248 | NM_021522    | ubiquitin specific peptidase 14             | 1.083 | 81.02 | 0.86423 | 28457 P | 1.193  | 3.82  | 0.05026 | 1858  |



|               |               |              |                                               |       |       |         |         |        |       |         |       |
|---------------|---------------|--------------|-----------------------------------------------|-------|-------|---------|---------|--------|-------|---------|-------|
| 3110002H16Rik | A_52_P112931  | NM_029623    | RIKEN cDNA 3110002H16 gene                    | 1.082 | 82.34 | 0.90549 | 31475 P | 1.172  | 4.63  | 0.05574 | 2022  |
| 8430419L09Rik | A_52_P116628  | BC079676     | RIKEN cDNA 8430419L09 gene                    | 1.082 | 81.02 | 0.87291 | 29113 P | -1.497 | 0     | 0.00584 | 11    |
| Als2          | A_51_P180061  | NM_028717    | amyotrophic lateral sclerosis 2 (juvenile)    | 1.082 | 81.02 | 0.84434 | 23873 M | 1.175  | 3.82  | 0.03882 | 1462  |
| Aspn          | A_51_P142813  | NM_025711    | asporin                                       | 1.082 | 81.02 | 0.87464 | 29213 P | 1.021  | 38.4  | 0.69959 | 10314 |
| Bri3          | A_51_P126643  | NM_018772    | brain protein I3                              | 1.082 | 82.34 | 0.8965  | 30737 P | -1.324 | 0.51  | 0.00627 | 140   |
| Cdca8         | A_52_P463220  | AK031571     | cell division cycle associated 8              | 1.082 | 82.34 | 0.89289 | 28533 M | 1.12   | 8.32  | 0.0794  | 2641  |
| Eea1          | A_51_P224617  | NM_001001932 | early endosome antigen 1                      | 1.082 | 81.02 | 0.87933 | 29624 P | 1.002  | 42.43 | 0.98357 | 12895 |
| Gbe1          | A_51_P273684  | NM_028803    | glucan (1,4-alpha-), branching enzyme 1       | 1.082 | 72.2  | 0.89158 | 24337 M | 1.145  | 3.82  | 0.02595 | 1069  |
| Heyl          | A_52_P337259  | NM_013905    | hairly/enhancer-of-split related with YRPV    | 1.082 | 81.02 | 0.83384 | 24753 M | 1.04   | 30.75 | 0.46638 | 8171  |
| Hmbs          | A_51_P155361  | NM_013551    | hydroxymethylbilane synthase                  | 1.082 | 84.22 | 0.85614 | 26324 P | 1.043  | 33.49 | 0.634   | 9756  |
| Immt          | A_51_P485556  | NM_029673    | inner membrane protein, mitochondrial         | 1.082 | 72.2  | 0.78867 | 23339 P | 1.07   | 25.31 | 0.46231 | 8136  |
| Mars2         | A_51_P396385  | NM_175439    | methionine-tRNA synthetase 2 (mitochondr      | 1.082 | 81.02 | 0.86362 | 28438 P | -1.091 | 11.33 | 0.09402 | 2981  |
| Usmg5         | A_51_P181365  | NM_023211    | upregulated during skeletal muscle growth     | 1.082 | 72.2  | 0.78638 | 23153 P | -1.023 | 47.92 | 0.63446 | 9758  |
| 2610033H07Rik | A_51_P246705  | NM_029278    | nucleolar protein 14                          | 1.081 | 82.34 | 0.91173 | 32132 P | 1.069  | 13.58 | 0.15566 | 4142  |
| Ap1m1         | A_51_P190805  | NM_007456    | adaptor-related protein complex AP-1, mi      | 1.081 | 83.36 | 0.93538 | 34232 P | 1.069  | 16.2  | 0.21835 | 5174  |
| Atp5c1        | A_51_P378087  | NM_020615    | ATP synthase, H+ transporting, mitochondr     | 1.081 | 72.2  | 0.84973 | 22297 M | 1.106  | 13.58 | 0.23923 | 5472  |
| Cebpa         | A_52_P168567  | NM_007678    | CCAAT/enhancer binding protein (C/EBP),       | 1.081 | 84.22 | 0.96215 | 36657 P | 1.039  | 28.13 | 0.43876 | 7910  |
| Csnk2b        | A_51_P373379  | NM_009975    | casein kinase 2, beta polypeptide             | 1.081 | 82.34 | 0.91547 | 32636 P | 1.067  | 19.02 | 0.27939 | 6086  |
| Ech1          | A_51_P421846  | NM_016772    | enoyl coenzyme A hydratase 1, peroxisom       | 1.081 | 81.02 | 0.88647 | 30056 P | 1.056  | 22.1  | 0.35022 | 6877  |
| Eif2s2        | A_52_P107354  | NM_026030    | eukaryotic translation initiation factor 2, s | 1.081 | 82.34 | 0.90996 | 31938 P | -1.056 | 45.68 | 0.69683 | 10292 |
| Gabpb1        | A_52_P331701  | NM_207669    | GA repeat binding protein, beta 1             | 1.081 | 72.2  | 0.78777 | 23248 P | 1.084  | 13.58 | 0.21375 | 5094  |
| Lgi2          | A_52_P446364  | AK122570     | leucine-rich repeat LGI family, member 2      | 1.081 | 82.34 | 0.91013 | 31973 P | 1.027  | 33.49 | 0.5401  | 8947  |
| Lpxn          | A_51_P419147  | NM_134152    | leupaxin                                      | 1.081 | 84.22 | 0.96604 | 37125 P | 1.077  | 19.02 | 0.35337 | 6930  |
| Ndufv1        | A_51_P364339  | NM_133666    | NADH dehydrogenase (ubiquinone) flavop        | 1.081 | 79.26 | 0.85089 | 27773 P | 1.035  | 30.75 | 0.47895 | 8299  |
| Pex19         | A_51_P427177  | NM_023041    | peroxisome biogenesis factor 19               | 1.081 | 77.44 | 0.81427 | 25000 P | 1.084  | 11.33 | 0.13417 | 3752  |
| Prkcc         | A_51_P290290  | NM_011102    | protein kinase C, gamma                       | 1.081 | 79.26 | 0.83927 | 27064 P | 1.063  | 22.1  | 0.30678 | 6400  |
| Smarcd3       | A_51_P423880  | NM_025891    | SWI/SNF related, matrix associated, actin     | 1.081 | 79.26 | 0.83534 | 26730 P | 1.035  | 36.07 | 0.73541 | 10639 |
| Tbc1d8        | A_51_P448005  | NM_018775    | TBC1 domain family, member 8                  | 1.081 | 79.26 | 0.83817 | 26991 P | -1.197 | 1.1   | 0.01654 | 709   |
| Tbx6          | A_51_P105991  | NM_011538    | T-box 6                                       | 1.081 | 81.02 | 0.8711  | 28993 P | -1.002 | 49.48 | 0.9753  | 12789 |
| Unc13b        | A_52_P1005171 | AK161056     | unc-13 homolog B (C. elegans)                 | 1.081 | 81.02 | 0.88461 | 29969 P | 1.002  | 42.43 | 0.96667 | 12716 |
| Wisp1         | A_51_P220343  | NM_018865    | WNT1 inducible signaling pathway protein      | 1.081 | 79.26 | 0.83388 | 26423 P | -1.038 | 43.75 | 0.41184 | 7631  |
| Acadvl        | A_51_P518340  | NM_017366    | acyl-Coenzyme A dehydrogenase, very lo        | 1.08  | 69.29 | 0.7874  | 23222 P | 1.05   | 22.1  | 0.31396 | 6510  |
| Atp6v1d       | A_51_P393598  | NM_023721    | ATPase, H+ transporting, lysosomal V1 su      | 1.08  | 81.02 | 0.90781 | 22829 M | 1.197  | 5.75  | 0.12525 | 3608  |
| Dhcr7         | A_51_P290986  | NM_007856    | 7-dehydrocholesterol reductase                | 1.08  | 82.34 | 0.89818 | 30822 P | -1.021 | 49.48 | 0.90809 | 12179 |
| Dhx29         | A_52_P250278  | NM_172594    | DEAH (Asp-Glu-Ala-His) box polypeptide 2      | 1.08  | 82.34 | 0.91243 | 32233 P | -1.087 | 22.1  | 0.18331 | 4633  |
| Gnat2         | A_51_P359411  | NM_008141    | guanine nucleotide binding protein, alpha     | 1.08  | 82.34 | 0.90914 | 31804 P | 1.122  | 6.98  | 0.05167 | 1902  |
| Meis1         | A_52_P670612  | NM_010789    | myeloid ecotropic viral integration site 1    | 1.08  | 77.44 | 0.80959 | 24675 P | 1.149  | 11.33 | 0.24826 | 5621  |
| Phf21a        | A_52_P505357  | AK089411     | PHD finger protein 21A                        | 1.08  |       | 0.94102 | 29571 A | 1.074  | 16.2  | 0.23039 | 5357  |
| Reck          | A_51_P271887  | NM_016678    | reversion-inducing-cysteine-rich protein v    | 1.08  | 82.34 | 0.90095 | 31049 P | -1.287 | 0.51  | 0.00627 | 150   |
| Rgs5          | A_51_P354934  | AK028765     | regulator of G-protein signaling 5            | 1.08  | 81.02 | 0.86744 | 28698 P | 1.081  | 13.58 | 0.17145 | 4403  |
| Tpr           | A_51_P221802  | NM_133780    | translocated promoter region                  | 1.08  | 81.02 | 0.86511 | 28523 P | -1.056 | 33.49 | 0.23223 | 5383  |
| 1200009I06Rik | A_51_P204486  | NM_028807    | RIKEN cDNA 1200009I06 gene                    | 1.079 | 84.22 | 0.9617  | 36613 P | -1.015 | 49.48 | 0.84594 | 11569 |
| Cdc34         | A_52_P661496  | XM_982476    | cell division cycle 34 homolog (S. cerevisi   | 1.079 | 81.02 | 0.8816  | 27910 M | 1.095  | 13.58 | 0.19532 | 4824  |
| Cyp4a14       | A_51_P238576  | NM_007822    | cytochrome P450, family 4, subfamily a, p     | 1.079 | 82.34 | 0.90152 | 31102 P | 1.143  | 5.75  | 0.06192 | 2187  |
| Fgf6          | A_52_P155536  | NM_010204    | fibroblast growth factor 6                    | 1.079 | 83.36 | 0.8666  | 27100 M | 1.126  | 5.75  | 0.03957 | 1506  |
| Fkh18         | A_51_P296249  | NM_010226    | forkhead-like 18 (Drosophila)                 | 1.079 | 77.44 | 0.82996 | 26060 P | 1.003  | 42.43 | 0.96107 | 12674 |
| Git1          | A_52_P165059  | NM_001004144 | G protein-coupled receptor kinase-interac     | 1.079 | 81.02 | 0.8659  | 28561 P | -1.026 | 46.3  | 0.53961 | 8935  |
| Lman2         | A_52_P112651  | NM_025828    | lectin, mannose-binding 2                     | 1.079 | 79.26 | 0.8356  | 26807 P | -1.134 | 6.98  | 0.09995 | 3103  |
| Net1          | A_52_P421499  | AK020636     | neuroepithelial cell transforming gene 1      | 1.079 | 82.34 | 0.82983 | 24522 P | -1.003 | 49.48 | 0.97829 | 12827 |
| Phox2b        | A_51_P494491  | NM_008888    | paired-like homeobox 2b                       | 1.079 | 83.95 | 0.95727 | 36105 P | 1.061  | 25.31 | 0.4022  | 7537  |
| Pitpnc1       | A_52_P1028214 | AK171340     | phosphatidylinositol transfer protein, cyto   | 1.079 | 82.34 | 0.90781 | 27435 M | 1.012  | 42.43 | 0.84131 | 11534 |
| Polr2e        | A_52_P973604  | BC045521     | polymerase (RNA) II (DNA directed) polyp      | 1.079 | 81.02 | 0.87382 | 29150 P | 1.061  | 16.2  | 0.20332 | 4943  |
| Prdx2         | A_52_P893440  | NM_011563    | peroxiredoxin 2                               | 1.079 | 82.34 | 0.91866 | 32929 P | -1.12  | 9.71  | 0.10985 | 3262  |

|               |              |              |                                                  |       |       |         |         |        |       |         |       |
|---------------|--------------|--------------|--------------------------------------------------|-------|-------|---------|---------|--------|-------|---------|-------|
| 1110007L15Rik | A_52_P488200 | NM_026269    | RIKEN cDNA 1110007L15 gene                       | 1.078 | 82.34 | 0.92451 | 33419 P | 1.024  | 38.4  | 0.77123 | 10936 |
| AU016693      | A_52_P152240 | NM_178686    | coiled-coil domain containing 100                | 1.078 | 79.26 | 0.84699 | 27553 P | 1.015  | 40.63 | 0.73869 | 10671 |
| D8ErtD354e    | A_51_P467751 | NM_029884    | heparan-alpha-glucosaminide N-acetyltra          | 1.078 | 82.34 | 0.89827 | 30838 P | -1.212 | 0.92  | 0.0153  | 654   |
| Dpp8          | A_52_P481202 | NM_028906    | dipeptidylpeptidase 8                            | 1.078 | 81.02 | 0.86086 | 28270 P | 1.05   | 25.31 | 0.38497 | 7338  |
| Nup37         | A_51_P351009 | NM_028334    | nucleoporin 37                                   | 1.078 | 82.34 | 0.8968  | 30765 P | 1.067  | 19.02 | 0.26029 | 5814  |
| Sipa12        | A_52_P26318  | BC072593     | signal-induced proliferation-associated 1        | 1.078 | 81.02 | 0.86175 | 28340 P | 1.035  | 30.75 | 0.50083 | 8588  |
| Sp100         | A_51_P255016 | XM_976918    | nuclear antigen Sp100                            | 1.078 | 81.02 | 0.82885 | 24456 M | -1.061 | 30.75 | 0.2043  | 4956  |
| Supt16h       | A_51_P280532 | NM_033618    | suppressor of Ty 16 homolog (S. cerevisia        | 1.078 | 77.44 | 0.81482 | 25067 P | -1.04  | 45.05 | 0.57286 | 9209  |
| Thrb          | A_52_P265108 | NM_009380    | thyroid hormone receptor beta                    | 1.078 | 81.02 | 0.90137 | 29118 P | 1.022  | 36.07 | 0.6048  | 9488  |
| 4930533K18Rik | A_52_P305841 | AK017042     | RIKEN cDNA 4930533K18 gene                       | 1.077 |       | 0.9138  | 20589 A | 1.161  | 8.32  | 0.15167 | 4060  |
| 5430411K18Rik | A_52_P630571 | XM_973419    | RIKEN cDNA 5430411K18 gene                       | 1.077 | 81.02 | 0.86856 | 28790 P | 1.074  | 16.2  | 0.18898 | 4708  |
| Copa          | A_52_P272519 | NM_009938    | coatomer protein complex subunit alpha           | 1.077 | 81.02 | 0.88869 | 30175 P | 1.252  | 3.01  | 0.04563 | 1712  |
| Gabarapl2     | A_52_P2015   | NM_026693    | gamma-aminobutyric acid (GABA-A) rece            | 1.077 | 81.02 | 0.88592 | 30016 P | 1.355  | 1.62  | 0.0338  | 1308  |
| Mod1          | A_51_P186601 | M29546       | malic enzyme, supernatant                        | 1.077 | 81.02 | 0.8754  | 29311 P | 1.065  | 19.02 | 0.23298 | 5397  |
| Pex1          | A_52_P682456 | AK082305     | peroxisome biogenesis factor 1                   | 1.077 | 81.02 | 0.89192 | 30408 P | -1.059 | 36.07 | 0.29561 | 6280  |
| Rhoj          | A_52_P592466 | NM_023275    | ras homolog gene family, member J                | 1.077 | 82.34 | 0.90804 | 31663 P | 1.112  | 8.32  | 0.06488 | 2281  |
| Skiv2l2       | A_51_P476711 | NM_028151    | superkiller viralicidic activity 2-like 2 (S. ce | 1.077 | 77.44 | 0.81686 | 25213 P | -1.045 | 43.75 | 0.46161 | 8121  |
| Tbce          | A_51_P351137 | NM_178337    | tubulin-specific chaperone e                     | 1.077 | 82.34 | 0.90474 | 31417 P | 1.1    | 11.33 | 0.12036 | 3501  |
| Tpd52         | A_52_P151853 | NM_001025262 | tumor protein D52                                | 1.077 | 83.36 | 0.93304 | 34038 P | 1.368  | 0.24  | 0.00619 | 119   |
| Atp13a2       | A_51_P507942 | NM_029097    | ATPase type 13A2                                 | 1.076 | 83.36 | 0.92446 | 33400 P | -1.02  | 48.7  | 0.68852 | 10224 |
| Casp3         | A_51_P382618 | U49929       | caspase 3                                        | 1.076 | 82.34 | 0.90137 | 31074 P | -1.038 | 47.43 | 0.74234 | 10706 |
| D10ErtD438e   | A_52_P266909 | XM_992169    |                                                  | 1.076 | 79.26 | 0.83817 | 26990 P | -1.117 | 9.71  | 0.10441 | 3194  |
| lkbkb         | A_52_P64364  | NM_010546    | inhibitor of kappaB kinase beta                  | 1.076 | 81.02 | 0.87678 | 29372 P | 1.073  | 16.2  | 0.17362 | 4437  |
| Lrrk1         | A_52_P212686 | NM_146191    | leucine-rich repeat kinase 1                     | 1.076 | 83.36 | 0.91949 | 30573 M | -1.078 | 25.31 | 0.19852 | 4875  |
| Nfx1          | A_51_P376765 | NM_023739    | nuclear transcription factor, X-box binding      | 1.076 | 82.34 | 0.90474 | 31419 P | 1.07   | 25.31 | 0.49593 | 8517  |
| P4ha2         | A_52_P663413 | NM_011031    | procollagen-proline, 2-oxoglutarate 4-dio        | 1.076 | 81.02 | 0.88376 | 29892 P | 1.026  | 33.49 | 0.55596 | 9074  |
| Pole4         | A_51_P465043 | NM_025882    | polymerase (DNA-directed), epsilon 4 (p1         | 1.076 | 81.02 | 0.86523 | 28534 P | -1.224 | 1.18  | 0.02331 | 980   |
| Vps13d        | A_52_P963388 | AK035276     | vacuolar protein sorting 13 D (yeast)            | 1.076 | 79.26 | 0.93538 | 24054 M | 1.029  | 33.49 | 0.51806 | 8748  |
| Wtip          | A_52_P481686 | NM_207212    | WT1-interacting protein                          | 1.076 | 79.26 | 0.83288 | 26319 P | 1.033  | 30.75 | 0.44065 | 7927  |
| 1810034K20Rik | A_51_P102652 | NM_023397    | RIKEN cDNA 1810034K20 gene                       | 1.075 | 81.02 | 0.87673 | 29368 P | -1.098 | 11.33 | 0.09709 | 3038  |
| Cab39         | A_51_P230934 | NM_133781    | calcium binding protein 39                       | 1.075 | 79.26 | 0.85443 | 27970 P | 1.05   | 28.13 | 0.47441 | 8247  |
| Carm1         | A_52_P119883 | NM_021531    | coactivator-associated arginine methyltra        | 1.075 | 79.26 | 0.84505 | 25557 P | 1.022  | 38.4  | 0.66683 | 10018 |
| D15ErtD621e   | A_52_P100506 | NM_145959    | DNA segment, Chr 15, ERATO Doi 621, exp          | 1.075 | 75.14 | 0.81473 | 25051 P | 1.078  | 16.2  | 0.23633 | 5442  |
| Edg5          | A_51_P499871 | NM_010333    | endothelial differentiation, sphingolipid C      | 1.075 |       | 0.94912 | 18401 A | 1.008  | 42.43 | 0.85207 | 11613 |
| Gpr126        | A_52_P414645 | NM_001002268 | G protein-coupled receptor 126                   | 1.075 | 84.4  | 0.97049 | 37480 P | 1.05   | 28.13 | 0.44509 | 7962  |
| Mmaa          | A_51_P270364 | NM_133823    | methylmalonic aciduria (cobalamin defici         | 1.075 | 79.26 | 0.83967 | 27102 P | 1.006  | 42.43 | 0.92631 | 12360 |
| Nfatc4        | A_52_P342159 | NM_023699    | nuclear factor of activated T-cells, cytopla     | 1.075 | 83.95 | 0.95723 | 36104 P | -1.085 | 22.1  | 0.17545 | 4488  |
| Nup188        | A_51_P421041 | U89435       | nucleoporin 188                                  | 1.075 |       | 0.90522 | 22560 A | -1.074 | 19.02 | 0.1233  | 3565  |
| Oaz2          | A_52_P90289  | NM_010952    | ornithine decarboxylase antizyme 2               | 1.075 | 79.26 | 0.83448 | 26513 P | -1.013 | 49.48 | 0.77199 | 10939 |
| Pkd2          | A_52_P234729 | NM_008861    | polycystic kidney disease 2                      | 1.075 | 82.34 | 0.9349  | 24258 M | -1.046 | 42.43 | 0.37807 | 7256  |
| Rnf44         | A_52_P536000 | AK129290     | ring finger protein 44                           | 1.075 | 77.44 | 0.83198 | 26199 P | -1.385 | 0.51  | 0.00584 | 69    |
| Suclg1        | A_51_P491227 | NM_019879    | succinate-CoA ligase, GDP-forming, alpha         | 1.075 | 81.02 | 0.8711  | 28996 P | 1.139  | 5.75  | 0.05307 | 1957  |
| Trim44        | A_52_P468821 | NM_020267    | tripartite motif-containing 44                   | 1.075 | 81.02 | 0.8701  | 28891 P | 1.116  | 6.98  | 0.05288 | 1945  |
| Txndc5        | A_52_P535561 | NM_145367    | thioredoxin domain containing 5                  | 1.075 | 79.26 | 0.84326 | 27288 P | 1.017  | 38.4  | 0.70466 | 10354 |
| 1700006J14Rik | A_51_P422223 | NM_177313    | RIKEN cDNA 1700006J14 gene                       | 1.074 | 75.14 | 0.81013 | 24703 P | 1.027  | 33.49 | 0.54758 | 9003  |
| 3110045G13Rik | A_51_P409583 | AK042308     | RIKEN cDNA 3110045G13 gene                       | 1.074 |       | 0.9493  | 18412 A | -1.022 | 48.39 | 0.68076 | 10139 |
| Atp1b1        | A_51_P151484 | NM_009721    | ATPase, Na+/K+ transporting, beta 1 poly         | 1.074 | 77.44 | 0.82688 | 25843 P | 1.297  | 0.66  | 0.00662 | 194   |
| Dab2ip        | A_52_P622471 | NM_001001602 | disabled homolog 2 (Drosophila) interacti        | 1.074 | 81.02 | 0.85901 | 28162 P | -1.039 | 45.05 | 0.53168 | 8856  |
| Dgkq          | A_51_P329869 | NM_199011    | diacylglycerol kinase, theta                     | 1.074 | 82.34 | 0.9045  | 31390 P | 1.013  | 42.43 | 0.88079 | 11867 |
| Eif5          | A_52_P336080 | AK051980     | eukaryotic translation initiation factor 5       | 1.074 | 82.34 | 0.8952  | 30667 P | 1.153  | 3.46  | 0.02405 | 1001  |
| Hbp1          | A_52_P39247  | NM_153198    | high mobility group box transcription fact       | 1.074 | 79.26 | 0.85257 | 27909 P | -1.049 | 42.43 | 0.3622  | 7052  |
| Hist2h3c1     | A_51_P359462 | NM_178216    | histone cluster 2, H3c1                          | 1.074 | 82.34 | 0.95092 | 30208 P | 1.186  | 3.82  | 0.03829 | 1455  |
| Nvl           | A_51_P232954 | NM_026171    | nuclear VCP-like                                 | 1.074 | 83.36 | 0.92982 | 33741 P | 1.087  | 11.33 | 0.11002 | 3264  |

|               |               |              |                                                 |       |       |         |         |        |       |         |       |
|---------------|---------------|--------------|-------------------------------------------------|-------|-------|---------|---------|--------|-------|---------|-------|
| Rab11b        | A_52_P160257  | NM_008997    | RAB11B, member RAS oncogene family              | 1.074 | 79.26 | 0.83817 | 26978 P | 1.183  | 4.63  | 0.05681 | 2054  |
| Rab40b        | A_51_P211471  | NM_139147    | Rab40b, member RAS oncogene family              | 1.074 | 83.36 | 0.89672 | 28805 M | 1.03   | 36.07 | 0.63989 | 9810  |
| Rer1          | A_51_P512002  | NM_026395    | RER1 retention in endoplasmic reticulum         | 1.074 | 82.34 | 0.91789 | 23461 M | -1.022 | 47.92 | 0.63181 | 9734  |
| Ube3a         | A_52_P625244  | NM_011668    | ubiquitin protein ligase E3A                    | 1.074 | 75.14 | 0.81287 | 24899 P | -1.037 | 44.4  | 0.44362 | 7952  |
| Zfp319        | A_52_P195327  | AK148655     | zinc finger protein 319                         | 1.074 | 79.26 | 0.85693 | 28091 M | 1.027  | 36.07 | 0.61035 | 9532  |
| 1110002E23Rik | A_52_P533825  | NM_025365    | RIKEN cDNA 1110002E23 gene                      | 1.073 | 77.44 | 0.83448 | 26519 P | 1.077  | 16.2  | 0.19046 | 4738  |
| 5730469M10Rik | A_51_P394354  | NM_027464    | RIKEN cDNA 5730469M10 gene                      | 1.073 | 81.02 | 0.89241 | 30439 P | 1.066  | 25.31 | 0.47428 | 8246  |
| BC017133      | A_52_P529013  | NM_146169    | poly(A) binding protein interacting protein     | 1.073 | 81.02 | 0.89059 | 30273 P | 1.118  | 11.33 | 0.22719 | 5317  |
| Cox8a         | A_52_P528726  | NM_007750    | cytochrome c oxidase, subunit VIIIa             | 1.073 | 79.26 | 0.90199 | 22555 M | 1.153  | 4.63  | 0.03601 | 1388  |
| Fgfr4         | A_51_P408100  | NM_008011    | fibroblast growth factor receptor 4             | 1.073 | 83.36 | 0.9372  | 34353 P | -1.17  | 1.32  | 0.02114 | 899   |
| Ranbp5        | A_52_P235569  | NM_023579    | RAN binding protein 5                           | 1.073 | 81.02 | 0.86681 | 28657 P | -1.001 | 49.48 | 0.98495 | 12917 |
| Rbm8a         | A_52_P355014  | NM_025875    | RNA binding motif protein 8a                    | 1.073 | 82.34 | 0.92283 | 33277 P | -1.091 | 22.1  | 0.19597 | 4836  |
| Sds           | A_51_P249335  | NM_145565    | serine dehydratase                              | 1.073 | 81.02 | 0.84995 | 24188 M | 1.116  | 8.32  | 0.07384 | 2506  |
| Tnfrsf13b     | A_51_P106269  | NM_021349    | tumor necrosis factor receptor superfamily      | 1.073 | 81.02 | 0.86489 | 26993 M | 1.03   | 36.07 | 0.64368 | 9826  |
| Tnpo1         | A_52_P420308  | BC058670     | transportin 1                                   | 1.073 | 81.02 | 0.90847 | 22864 M | 1.056  | 22.1  | 0.31099 | 6472  |
| 2700046G09Rik | A_52_P324656  | AK035700     | RIKEN cDNA 2700046G09 gene                      | 1.072 | 77.44 | 0.8236  | 25643 P | -1.112 | 8.32  | 0.07436 | 2513  |
| Abi1          | A_52_P157274  | NM_001077190 | abl-interactor 1                                | 1.072 | 81.02 | 0.86362 | 28432 P | 1.124  | 8.32  | 0.10705 | 3220  |
| Alms1         | A_52_P568651  | NM_145223    | Alstrom syndrome 1 homolog (human)              | 1.072 | 83.36 | 0.93319 | 34083 P | 1.123  | 6.98  | 0.06254 | 2210  |
| Cdc27         | A_52_P376841  | XM_903097    | cell division cycle 27 homolog (S. cerevisiae)  | 1.072 | 79.26 | 0.9036  | 22652 M | 1.122  | 9.71  | 0.17232 | 4409  |
| Fmo3          | A_51_P269404  | NM_008030    | flavin containing monooxygenase 3               | 1.072 |       | 0.96101 | 18705 A | 1.041  | 25.31 | 0.34982 | 6872  |
| Klk6          | A_51_P258570  | NM_011177    | kallikrein related-peptidase 6                  | 1.072 |       | 0.9584  | 18717 A | -1.376 | 0.66  | 0.0322  | 1265  |
| Rnf168        | A_52_P425706  | NM_027355    | ring finger protein 168                         | 1.072 | 82.34 | 0.9065  | 31548 P | 1.121  | 8.32  | 0.10712 | 3222  |
| Sart3         | A_51_P212023  | NM_016926    | squamous cell carcinoma antigen recognized      | 1.072 | 83.95 | 0.95916 | 36312 P | 1.088  | 11.33 | 0.10757 | 3228  |
| Spata7        | A_52_P134680  | AK045704     | spermatogenesis associated 7                    | 1.072 | 83.36 | 0.93764 | 34394 P | 1.222  | 1.62  | 0.01251 | 505   |
| Trerf1        | A_52_P457967  | NM_172622    | transcriptional regulating factor 1             | 1.072 | 81.02 | 0.87202 | 29083 P | 1.02   | 40.63 | 0.76223 | 10876 |
| 2510003E04Rik | A_51_P296975  | AK035659     | RIKEN cDNA 2510003E04 gene                      | 1.071 | 82.34 | 0.91805 | 32801 P | 1.092  | 11.33 | 0.10258 | 3162  |
| Gria3         | A_52_P68221   | NM_016886    | glutamate receptor, ionotropic, AMPA3 (alpha)   | 1.071 | 83.36 | 0.93874 | 34473 P | 1.017  | 40.63 | 0.76026 | 10861 |
| Hemgn         | A_52_P311276  | NM_053149    | hemogen                                         | 1.071 | 84.22 | 0.96415 | 36814 P | 1.085  | 13.58 | 0.15833 | 4188  |
| Ilf3          | A_52_P508355  | NM_010561    | interleukin enhancer binding factor 3           | 1.071 | 82.34 | 0.89331 | 30518 P | 1.042  | 30.75 | 0.49593 | 8518  |
| Jag1          | A_52_P634090  | NM_013822    | jagged 1                                        | 1.071 | 82.34 | 0.91325 | 32372 P | 1.16   | 11.33 | 0.28508 | 6147  |
| Psmc7         | A_52_P676913  | NM_010817    | proteasome (prosome, macropain) 26S subunit     | 1.071 | 82.34 | 0.91426 | 32442 P | 1.134  | 6.98  | 0.05982 | 2148  |
| Serpinh1      | A_51_P287069  | NM_009825    | serine (or cysteine) peptidase inhibitor, cl    | 1.071 | 79.26 | 0.8698  | 27287 P | 1.186  | 4.63  | 0.06763 | 2353  |
| Sox9          | A_51_P451606  | NM_011448    | SRY-box containing gene 9                       | 1.071 | 81.02 | 0.86105 | 28300 P | 1.091  | 13.58 | 0.15575 | 4143  |
| 2700008B19Rik | A_52_P1077588 | XM_902919    | RIKEN cDNA 2700008B19 gene                      | 1.07  | 83.36 | 0.94226 | 34728 P | 1.05   | 28.13 | 0.50027 | 8584  |
| Adamts9       | A_51_P479390  | AK007436     | a disintegrin-like and metallopeptidase (mem    | 1.07  | 83.36 | 0.92526 | 33465 P | -1.131 | 4.63  | 0.05972 | 2141  |
| Ankrd28       | A_52_P37890   | AK088541     | ankyrin repeat domain 28                        | 1.07  | 81.02 | 0.87504 | 29257 P | 1.134  | 8.32  | 0.1097  | 3259  |
| Ash2l         | A_52_P571591  | NM_011791    | ash2 (absent, small, or homeotic)-like (Dros    | 1.07  | 82.34 | 0.89818 | 30819 P | 1.069  | 16.2  | 0.17482 | 4475  |
| Ddit4         | A_51_P245796  | NM_029083    | DNA-damage-inducible transcript 4               | 1.07  | 81.02 | 0.90804 | 22846 M | -1.202 | 1.1   | 0.01778 | 753   |
| Dtymk         | A_51_P405766  | NM_023136    | deoxythymidylate kinase                         | 1.07  | 81.02 | 0.87933 | 29623 P | 1.054  | 22.1  | 0.26817 | 5916  |
| E130306D19Rik | A_52_P143671  | NM_001013377 | RIKEN cDNA E130306D19 gene                      | 1.07  |       | 0.95454 | 18577 A | 1.02   | 40.63 | 0.73795 | 10662 |
| Gtf2f1        | A_51_P193669  | NM_133801    | general transcription factor IIf, polypeptide   | 1.07  | 75.14 | 0.82593 | 25742 P | 1.016  | 40.63 | 0.72187 | 10511 |
| Hspa4         | A_52_P617817  | NM_008300    | heat shock protein 4                            | 1.07  | 82.34 | 0.894   | 30583 P | 1.091  | 19.02 | 0.42425 | 7768  |
| Mcpt6         | A_52_P254155  | NM_010781    | mast cell protease 6                            | 1.07  | 79.26 | 0.84917 | 27702 M | -1.063 | 28.13 | 0.19059 | 4744  |
| Mfap2         | A_51_P227502  | NM_008546    | microfibrillar-associated protein 2             | 1.07  | 83.36 | 0.93855 | 34441 P | -1.061 | 40.63 | 0.37785 | 7253  |
| Mt2           | A_51_P246317  | NM_008630    | metallothionein 2                               | 1.07  | 83.36 | 0.94951 | 24838 M | 1.048  | 30.75 | 0.59505 | 9396  |
| Odz2          | A_52_P47660   | NM_011856    | odd Oz/ten-m homolog 2 (Drosophila)             | 1.07  | 82.34 | 0.91097 | 32045 P | 1.006  | 42.43 | 0.95177 | 12601 |
| Pip5k1b       | A_51_P441979  | NM_008847    | phosphatidylinositol-4-phosphate 5-kinase       | 1.07  | 82.34 | 0.91011 | 31968 P | 1.121  | 9.71  | 0.16079 | 4226  |
| Snopc4        | A_51_P349036  | NM_172339    | small nuclear RNA activating complex, poly      | 1.07  | 83.95 | 0.95282 | 35788 P | 1.053  | 22.1  | 0.25544 | 5735  |
| Tgm2          | A_51_P182796  | NM_009373    | transglutaminase 2, C polypeptide               | 1.07  | 81.02 | 0.8682  | 28754 P | 1.102  | 16.2  | 0.30765 | 6409  |
| Vapa          | A_51_P361788  | NM_013933    | vesicle-associated membrane protein, associated | 1.07  | 83.36 | 0.93916 | 24439 M | 1.045  | 25.31 | 0.3817  | 7300  |
| Vps54         | A_52_P258501  | AK084305     | vacuolar protein sorting 54 (yeast)             | 1.07  | 82.34 | 0.90295 | 31251 P | 1.022  | 38.4  | 0.74374 | 10742 |
| 1110001J03Rik | A_51_P406077  | NM_025363    | RIKEN cDNA 1110001J03 gene                      | 1.069 | 83.36 | 0.9349  | 34189 P | 1.172  | 3.82  | 0.04432 | 1653  |
| 2310066E14Rik | A_51_P310447  | BC079880     | RIKEN cDNA 2310066E14 gene                      | 1.069 | 82.34 | 0.92201 | 33201 P | 1.215  | 1.32  | 0.00977 | 358   |

|               |              |              |                                              |       |       |         |         |        |       |         |       |
|---------------|--------------|--------------|----------------------------------------------|-------|-------|---------|---------|--------|-------|---------|-------|
| 3230401D17Rik | A_51_P451808 | NM_025699    | RIKEN cDNA 3230401D17 gene                   | 1.069 | 77.44 | 0.83461 | 26600 P | 1.019  | 42.43 | 0.87731 | 11832 |
| AI553587      | A_52_P657759 | NM_178909    | expressed sequence AI553587                  | 1.069 | 82.34 | 0.9185  | 32879 P | 1.094  | 13.58 | 0.17534 | 4487  |
| Bmp4          | A_51_P383741 | NM_007554    | bone morphogenetic protein 4                 | 1.069 | 81.02 | 0.87362 | 29149 P | 1.035  | 33.49 | 0.62917 | 9709  |
| DOH4S114      | A_52_P507790 | AK051015     | DNA segment, human D4S114                    | 1.069 | 82.34 | 0.90966 | 31912 P | 1.041  | 28.13 | 0.41635 | 7702  |
| Flnc          | A_51_P349844 | BC060276     | filamin C, gamma (actin binding protein 2)   | 1.069 | 75.14 | 0.85639 | 24513 M | -1.014 | 49.48 | 0.83937 | 11526 |
| Fmn1          | A_51_P349912 | NM_010230    | formin 1                                     | 1.069 | 77.44 | 0.87681 | 27661 M | -1.046 | 38.4  | 0.281   | 6100  |
| Hras1         | A_51_P357664 | NM_008284    | Harvey rat sarcoma virus oncogene 1          | 1.069 | 81.02 | 0.87296 | 29116 P | 1.004  | 42.43 | 0.93433 | 12422 |
| Loh11cr2a     | A_51_P502661 | NM_172767    | loss of heterozygosity, 11, chromosomal r    | 1.069 | 81.02 | 0.8711  | 28966 P | 1.097  | 9.71  | 0.09218 | 2949  |
| Ndubf7        | A_51_P519276 | NM_025843    | NADH dehydrogenase (ubiquinone) 1 bet        | 1.069 | 81.02 | 0.88529 | 29985 P | 1.027  | 38.4  | 0.72705 | 10535 |
| Palm          | A_52_P325444 | NM_023128    | paralemmin                                   | 1.069 | 82.34 | 0.91866 | 32922 P | 1.044  | 28.13 | 0.45026 | 7994  |
| Pkn3          | A_52_P96040  | NM_153805    | protein kinase N3                            | 1.069 | 81.02 | 0.88957 | 30226 M | -1.042 | 42.43 | 0.33926 | 6768  |
| Rab28         | A_51_P198045 | AK012286     | RAB28, member RAS oncogene family            | 1.069 | 82.34 | 0.89932 | 30951 P | -1.02  | 49.22 | 0.72823 | 10550 |
| Trappc6b      | A_51_P432354 | NM_030057    | trafficking protein particle complex 6B      | 1.069 | 81.02 | 0.8782  | 29500 P | 1.048  | 22.1  | 0.2837  | 6127  |
| O610013E23Rik | A_51_P148494 | NM_029788    | RIKEN cDNA O610013E23 gene                   | 1.068 | 81.02 | 0.8925  | 30448 P | 1.081  | 13.58 | 0.15653 | 4154  |
| Arid1b        | A_52_P289256 | XM_139711    | AT rich interactive domain 1B (Swi1 like)    | 1.068 | 83.36 | 0.93688 | 34317 P | 1.207  | 3.01  | 0.03143 | 1240  |
| Atp5b         | A_52_P328078 | NM_016774    | ATP synthase, H+ transporting mitochond      | 1.068 | 79.26 | 0.84266 | 27250 P | -1.06  | 42.43 | 0.45184 | 8012  |
| B130050I23Rik | A_51_P436861 | AK009699     | RIKEN cDNA B130050I23 gene                   | 1.068 | 81.02 | 0.86944 | 28854 P | 1.089  | 13.58 | 0.21629 | 5132  |
| Bat3          | A_52_P130185 | NM_057171    | HLA-B-associated transcript 3                | 1.068 | 77.44 | 0.83815 | 26956 P | 1.131  | 6.98  | 0.06159 | 2183  |
| D17Wsu104e    | A_51_P123920 | NM_080837    | DNA segment, Chr 17, Wayne State Unive       | 1.068 | 82.34 | 0.89822 | 30828 P | -1.094 | 30.75 | 0.34242 | 6794  |
| Mthfd1l       | A_52_P167278 | NM_172308    | methylenetetrahydrofolate dehydrogenas       | 1.068 | 79.26 | 0.89905 | 28960 P | 1.276  | 2.04  | 0.03085 | 1216  |
| Nckap1        | A_51_P114606 | NM_016965    | NCK-associated protein 1                     | 1.068 | 81.02 | 0.87616 | 29342 P | 1.112  | 9.71  | 0.12552 | 3616  |
| Ppp1r12c      | A_51_P208410 | AK144691     | protein phosphatase 1, regulatory (inhibit   | 1.068 | 82.34 | 0.90431 | 31382 P | -1.073 | 36.07 | 0.34952 | 6864  |
| Psm3          | A_51_P391542 | NM_011184    | proteasome (prosome, macropain) subun        | 1.068 | 82.34 | 0.91645 | 32706 P | 1.009  | 42.43 | 0.91162 | 12227 |
| Ptplb         | A_51_P377489 | AF169286     | protein tyrosine phosphatase-like (proline   | 1.068 | 82.34 | 0.90191 | 31157 P | -1.208 | 0.75  | 0.01141 | 462   |
| Rpl15         | A_52_P12346  | NM_025586    | ribosomal protein L15                        | 1.068 | 77.44 | 0.90152 | 22519 M | 1.016  | 42.43 | 0.83699 | 11507 |
| Slc2a4        | A_51_P217498 | NM_009204    | solute carrier family 2 (facilitated glucose | 1.068 | 82.34 | 0.89679 | 30763 P | 1.061  | 16.2  | 0.19792 | 4865  |
| Smox          | A_52_P430194 | AK087437     | spermine oxidase                             | 1.068 | 84.22 | 0.9617  | 36617 P | -1.112 | 11.33 | 0.1152  | 3385  |
| Usp47         | A_51_P357368 | NM_133758    | ubiquitin specific peptidase 47              | 1.068 | 81.02 | 0.86471 | 28494 P | 1.087  | 11.33 | 0.11939 | 3478  |
| Anapc10       | A_52_P495471 | NM_026904    | anaphase promoting complex subunit 10        | 1.067 | 81.02 | 0.86758 | 28721 M | -1.171 | 1.62  | 0.03004 | 1196  |
| Anxa2         | A_51_P165342 | NM_007585    | annexin A2                                   | 1.067 | 84.52 | 0.97889 | 38415 P | 1.117  | 11.33 | 0.24087 | 5502  |
| Cyp51         | A_52_P636752 | NM_020010    | cytochrome P450, family 51                   | 1.067 | 82.34 | 0.91861 | 32915 P | -1.171 | 11.33 | 0.25112 | 5663  |
| Ebf1          | A_51_P188054 | NM_007897    | early B-cell factor 1                        | 1.067 | 82.34 | 0.91525 | 32564 P | 1.095  | 16.2  | 0.35426 | 6945  |
| Hmox2         | A_52_P477819 | NM_010443    | heme oxygenase (decycling) 2                 | 1.067 | 82.34 | 0.90095 | 31055 P | -1.128 | 9.71  | 0.1399  | 3845  |
| Jph2          | A_52_P142143 | AK157145     | junctophilin 2                               | 1.067 | 82.34 | 0.89658 | 30757 M | 1.158  | 4.63  | 0.04799 | 1793  |
| Pde8b         | A_52_P185579 | AK034510     | phosphodiesterase 8B                         | 1.067 | 84.56 | 0.93314 | 31533 M | 1.048  | 22.1  | 0.26885 | 5931  |
| Ppp3cb        | A_52_P457382 | AK135203     | protein phosphatase 3, catalytic subunit,    | 1.067 | 81.02 | 0.87536 | 29288 P | 1.016  | 40.63 | 0.77595 | 10955 |
| Prpf4         | A_51_P193852 | NM_027297    | PRP4 pre-mRNA processing factor 4 hom        | 1.067 | 77.44 | 0.83487 | 26688 P | 1.138  | 8.32  | 0.09339 | 2975  |
| Rbmxrt        | A_51_P447714 | NM_009033    | RNA binding motif protein, X chromosom       | 1.067 | 81.02 | 0.87048 | 28930 P | 1.075  | 16.2  | 0.19537 | 4828  |
| Susd2         | A_52_P488666 | NM_027890    | sushi domain containing 2                    | 1.067 | 82.34 | 0.91251 | 32276 P | 1.302  | 9.71  | 0.36194 | 7041  |
| Tnfrsf19      | A_52_P7593   | BC030062     | tumor necrosis factor receptor superfam      | 1.067 | 81.02 | 0.95822 | 18704 A | 1.047  | 28.13 | 0.411   | 7617  |
| Uchl5         | A_51_P122238 | NM_019562    | ubiquitin carboxyl-terminal esterase L5      | 1.067 | 82.34 | 0.91005 | 31941 P | 1.194  | 3.82  | 0.05457 | 1995  |
| A430005L14Rik | A_51_P221535 | NM_175287    | RIKEN cDNA A430005L14 gene                   | 1.066 | 83.36 | 0.92998 | 33785 P | -1.003 | 49.48 | 0.94555 | 12534 |
| Arf6          | A_52_P93969  | NM_007481    | ADP-ribosylation factor 6                    | 1.066 | 81.02 | 0.86387 | 28447 P | 1.07   | 19.02 | 0.26008 | 5808  |
| Atrn          | A_52_P406419 | NM_009730    | attractin                                    | 1.066 | 83.36 | 0.93319 | 34084 P | 1.149  | 4.63  | 0.04467 | 1664  |
| Btbd14b       | A_52_P938109 | NM_025788    | BTB (POZ) domain containing 14B              | 1.066 | 84.56 | 0.89472 | 26901 M | 1.048  | 25.31 | 0.33154 | 6695  |
| Cdc37         | A_51_P425749 | NM_016742    | cell division cycle 37 homolog (S. cerevisi  | 1.066 | 81.02 | 0.88647 | 30054 P | -1.224 | 2.53  | 0.08911 | 2871  |
| Cdx1          | A_51_P318999 | NM_009880    | caudal type homeo box 1                      | 1.066 | 82.34 | 0.95728 | 18671 A | -1.08  | 13.58 | 0.10236 | 3159  |
| Cstf2         | A_51_P119460 | NM_133196    | cleavage stimulation factor, 3' pre-RNA su   | 1.066 | 82.34 | 0.89921 | 30942 P | 1.243  | 2.53  | 0.03104 | 1225  |
| Gclc          | A_51_P365019 | NM_010295    | glutamate-cysteine ligase, catalytic subun   | 1.066 | 77.44 | 0.84365 | 27323 P | -1.018 | 49.48 | 0.74374 | 10744 |
| Gmn           | A_51_P166155 | NM_020567    | geminin                                      | 1.066 | 82.34 | 0.89294 | 30491 P | -1.04  | 44.4  | 0.45877 | 8089  |
| Hspa8         | A_51_P170371 | NM_031165    | heat shock protein 8                         | 1.066 | 83.36 | 0.94607 | 24696 M | 1.086  | 13.58 | 0.19897 | 4883  |
| Kcnq1         | A_52_P618494 | AK142427     |                                              | 1.066 | 81.02 | 0.88901 | 30195 M | 1.04   | 36.07 | 0.73205 | 10595 |
| Mtus1         | A_52_P202895 | NM_001005863 | mitochondrial tumor suppressor 1             | 1.066 | 82.34 | 0.91836 | 32866 P | 1.047  | 30.75 | 0.54405 | 8977  |

|               |              |                   |                                                                               |       |       |         |         |        |       |         |       |
|---------------|--------------|-------------------|-------------------------------------------------------------------------------|-------|-------|---------|---------|--------|-------|---------|-------|
| Nsf1c         | A_51_P237766 | NM_198326         | NSFL1 (p97) cofactor (p47)                                                    | 1.066 | 81.02 | 0.88234 | 29819 P | 1.014  | 40.63 | 0.75566 | 10830 |
| PrkcsH        | A_51_P520690 | NM_008925         | protein kinase C substrate 80K-H                                              | 1.066 | 83.95 | 0.95304 | 35793 P | 1.02   | 40.63 | 0.75804 | 10854 |
| Psmc3         | A_51_P280971 | NM_008948         | proteasome (prosome, macropain) 26S subunit 1                                 | 1.066 | 83.36 | 0.93985 | 34556 P | 1.003  | 42.43 | 0.95029 | 12590 |
| Statip1       | A_51_P465871 | NM_021448         | elongation protein 2 homolog (S. cerevisiae)                                  | 1.066 | 83.36 | 0.9252  | 33457 P | 1.167  | 4.63  | 0.05026 | 1860  |
| Wdr43         | A_52_P8174   | AK152321          | WD repeat domain 43                                                           | 1.066 | 82.34 | 0.92084 | 33125 P | -1.017 | 49.48 | 0.8033  | 11200 |
| Zfp445        | A_52_P375016 | NM_173364         | zinc finger protein 445                                                       | 1.066 | 82.34 | 0.90935 | 31831 P | 1.213  | 4.63  | 0.07904 | 2632  |
| Anp32a        | A_51_P399071 | NM_009672         | acidic (leucine-rich) nuclear phosphoprotein 32                               | 1.065 | 77.44 | 0.84186 | 27216 P | 1.016  | 42.43 | 0.84626 | 11577 |
| Ascl1         | A_51_P437327 | NM_008553         | achaete-scute complex homolog-like 1 (Drosophila)                             | 1.065 | 83.95 | 0.88295 | 27983 P | 1.066  | 16.2  | 0.21503 | 5124  |
| Cxhc5         | A_51_P234788 | NM_133687         | CXHC finger 5                                                                 | 1.065 | 82.34 | 0.90352 | 31324 P | 1.073  | 16.2  | 0.18151 | 4605  |
| Gng5          | A_52_P678261 | NM_010318         | guanine nucleotide binding protein (G protein-coupled receptor class B group) | 1.065 | 82.34 | 0.91813 | 32841 P | 1.025  | 36.07 | 0.6184  | 9615  |
| Ndufs7        | A_51_P364671 | NM_029272         | NADH dehydrogenase (ubiquinone) Fe-S center protein 7                         | 1.065 | 83.95 | 0.94621 | 35096 P | -1.128 | 4.63  | 0.06279 | 2225  |
| Pcbd1         | A_51_P139320 | NM_025273         | pterin 4 alpha carbinolamine dehydratase                                      | 1.065 | 79.26 | 0.87767 | 25626 P | 1.047  | 25.31 | 0.32054 | 6572  |
| Pik3cd        | A_51_P142320 | U86587            | phosphatidylinositol 3-kinase catalytic domain 3                              | 1.065 | 83.36 | 0.88099 | 27880 M | 1.045  | 28.13 | 0.49171 | 8465  |
| Stk25         | A_51_P170326 | AK005289          | serine/threonine kinase 25 (yeast)                                            | 1.065 | 82.34 | 0.91141 | 32093 P | 1      | 49.48 | 0.99773 | 13031 |
| Tbc1d22a      | A_51_P416397 | NM_145476         | TBC1 domain family, member 22a                                                | 1.065 | 83.36 | 0.93874 | 34488 P | 1.006  | 42.43 | 0.91857 | 12254 |
| 6030443O07Rik | A_52_P465714 | AK031688          | RIKEN cDNA 6030443O07 gene                                                    | 1.064 | 83.95 | 0.94728 | 35194 P | 1.145  | 9.71  | 0.18469 | 4650  |
| Bnip3l        | A_52_P13612  | NM_009761         | BCL2/adenovirus E1B interacting protein 3                                     | 1.064 | 81.02 | 0.88679 | 30075 P | 1.139  | 9.71  | 0.19142 | 4758  |
| Ctla2a        | A_51_P180747 | NM_007796         | cytotoxic T lymphocyte-associated protein 2                                   | 1.064 | 82.34 | 0.91949 | 32986 P | 1.074  | 19.02 | 0.30682 | 6402  |
| Ftsj1         | A_51_P426559 | NM_133991         | FtsJ homolog 1 (E. coli)                                                      | 1.064 | 82.34 | 0.91983 | 33019 P | -1.017 | 49.47 | 0.71961 | 10496 |
| Gdap10        | A_51_P267587 | BC052902          | ganglioside-induced differentiation-associated protein 10                     | 1.064 | 79.26 | 0.85622 | 28056 P | 1.123  | 8.32  | 0.08632 | 2807  |
| Lphn1         | A_51_P427264 | NM_181039         | latrophilin 1                                                                 | 1.064 | 83.95 | 0.9493  | 35376 P | 1.138  | 13.58 | 0.38962 | 7393  |
| Mgmt          | A_52_P325621 | ENSMUST0000081510 | O-6-methylguanine-DNA methyltransferase                                       | 1.064 | 82.34 | 0.90924 | 31815 P | 1.1    | 8.32  | 0.06274 | 2222  |
| Mrps25        | A_51_P121325 | NM_025578         | mitochondrial ribosomal protein S25                                           | 1.064 | 81.02 | 0.87501 | 29256 P | -1.064 | 28.13 | 0.188   | 4696  |
| Rab40c        | A_52_P1638   | NM_139154         | Rab40c, member RAS oncogene family                                            | 1.064 | 81.02 | 0.8711  | 27355 M | -1.023 | 47.43 | 0.59587 | 9407  |
| Stab1         | A_52_P380399 | NM_138672         | stabilin 1                                                                    | 1.064 | 79.26 | 0.87454 | 25451 M | -1.041 | 43.15 | 0.40008 | 7511  |
| Ubtf          | A_52_P281879 | NM_011551         | upstream binding transcription factor, RNA polymerase II                      | 1.064 | 84.56 | 0.94241 | 27391 M | 1.04   | 33.49 | 0.59085 | 9337  |
| 2310039E09Rik | A_51_P378029 | NM_026509         | RIKEN cDNA 2310039E09 gene                                                    | 1.063 | 82.34 | 0.91577 | 25570 M | -1.029 | 45.68 | 0.52201 | 8766  |
| 2810407C02Rik | A_52_P445969 | NM_001040396      | RIKEN cDNA 2810407C02 gene                                                    | 1.063 | 81.02 | 0.88204 | 29794 P | 1.014  | 42.43 | 0.88161 | 11874 |
| Bri3bp        | A_52_P561236 | NM_029752         | Bri3 binding protein                                                          | 1.063 | 83.36 | 0.94748 | 29957 M | 1.003  | 42.43 | 0.9604  | 12664 |
| Gltscr2       | A_52_P405265 | NM_133831         | glioma tumor suppressor candidate region 2                                    | 1.063 | 81.02 | 0.86904 | 28844 P | -1.063 | 30.75 | 0.19241 | 4784  |
| Pbx1          | A_52_P543460 | NM_183355         | pre B-cell leukemia transcription factor 1                                    | 1.063 | 81.02 | 0.86821 | 28766 P | 1.017  | 42.43 | 0.89323 | 11995 |
| Rac1          | A_51_P513254 | NM_009007         | RAS-related C3 botulinum substrate 1                                          | 1.063 | 83.95 | 0.95341 | 25007 M | 1.229  | 1.62  | 0.01352 | 575   |
| Rps4x         | A_51_P267995 | NM_009094         | ribosomal protein S4, X-linked                                                | 1.063 | 83.36 | 0.94195 | 24538 M | 1.005  | 42.43 | 0.97683 | 12813 |
| Sephs1        | A_51_P214343 | NM_175400         | selenophosphate synthetase 1                                                  | 1.063 | 81.02 | 0.86821 | 28768 P | -1.079 | 22.1  | 0.14484 | 3943  |
| Sox21         | A_52_P406411 | NM_145464         | SRY-box containing gene 21                                                    | 1.063 | 81.02 | 0.89165 | 30373 P | -1.08  | 25.31 | 0.17971 | 4571  |
| Ss18          | A_52_P67964  | NM_009280         | synovial sarcoma translocation, Chromosome 18                                 | 1.063 | 83.36 | 0.88794 | 26246 P | 1.258  | 3.01  | 0.05047 | 1865  |
| Ttrap         | A_52_P56768  | NM_019551         | Traf and Tnf receptor associated protein 1                                    | 1.063 | 79.26 | 0.86435 | 28466 P | 1.111  | 6.98  | 0.05981 | 2143  |
| Ube2d2        | A_51_P426458 | NM_019912         | ubiquitin-conjugating enzyme E2D 2                                            | 1.063 | 82.34 | 0.91108 | 32069 P | 1.061  | 19.02 | 0.23395 | 5410  |
| 1300018I17Rik | A_51_P454234 | AK154409          | RIKEN cDNA 1300018I17 gene                                                    | 1.062 | 84.4  | 0.97013 | 37413 P | 1.123  | 9.71  | 0.12889 | 3677  |
| 2900073G15Rik | A_51_P150480 | NM_026064         | RIKEN cDNA 2900073G15 gene                                                    | 1.062 | 83.36 | 0.92665 | 33561 P | 1.247  | 11.33 | 0.41573 | 7689  |
| Heph          | A_52_P498219 | NM_181273         | hephaestin                                                                    | 1.062 | 84.52 | 0.97707 | 38204 P | -1.012 | 49.48 | 0.78638 | 11060 |
| Mdf1          | A_51_P368012 | NM_010783         | MyoD family inhibitor                                                         | 1.062 | 84.22 | 0.90183 | 29158 M | -1.162 | 3.01  | 0.04735 | 1768  |
| Nf2           | A_52_P124665 | AK161134          | neurofibromin 2                                                               | 1.062 |       | 0.95967 | 18767 A | 1.06   | 19.02 | 0.25181 | 5676  |
| PsmA5         | A_51_P257960 | NM_011967         | proteasome (prosome, macropain) subunit 5                                     | 1.062 | 83.36 | 0.93627 | 34294 P | 1.097  | 13.58 | 0.2114  | 5058  |
| Qrs1l         | A_51_P243930 | BC070459          | glutamyl-tRNA synthetase (glutamine-specific)                                 | 1.062 | 82.34 | 0.91994 | 33024 P | 1.007  | 42.43 | 0.91864 | 12260 |
| Rab5c         | A_51_P486479 | NM_024456         | RAB5C, member RAS oncogene family                                             | 1.062 | 79.26 | 0.86155 | 28330 P | 1.132  | 5.75  | 0.04256 | 1600  |
| Sirt3         | A_51_P477179 | NM_022433         | sirtuin 3 (silent mating type information regulation 2 homolog 3)             | 1.062 | 81.02 | 0.89219 | 30422 P | 1.045  | 30.75 | 0.57782 | 9246  |
| St3gal4       | A_52_P316474 | NM_009178         | ST3 beta-galactoside alpha-2,3-sialyltransferase 4                            | 1.062 | 84.22 | 0.96101 | 36485 P | 1.071  | 16.2  | 0.21488 | 5117  |
| Stc1          | A_51_P233334 | NM_009285         | stanniocalcin 1                                                               | 1.062 | 61.79 | 0.92263 | 26036 M | 1.015  | 40.63 | 0.7612  | 10868 |
| Zfp451        | A_52_P337471 | AK122541          | zinc finger protein 451                                                       | 1.062 | 81.02 | 0.87701 | 29393 P | 1.067  | 19.02 | 0.29693 | 6291  |
| Cct7          | A_51_P197259 | NM_007638         | chaperonin subunit 7 (eta)                                                    | 1.061 | 83.36 | 0.92998 | 33816 P | 1.085  | 22.1  | 0.49722 | 8546  |
| Coq3          | A_51_P378336 | NM_172687         | coenzyme Q3 homolog, methyltransferase                                        | 1.061 | 82.34 | 0.93087 | 29090 M | 1.053  | 19.02 | 0.38082 | 6751  |
| Pdlim7        | A_51_P506284 | NM_026131         | PDZ and LIM domain 7                                                          | 1.061 | 81.02 | 0.8698  | 28861 P | 1.018  | 40.63 | 0.71304 | 10427 |



|               |              |              |                                              |       |       |         |         |        |       |         |       |
|---------------|--------------|--------------|----------------------------------------------|-------|-------|---------|---------|--------|-------|---------|-------|
| Ppat          | A_51_P296905 | XM_896000    | phosphoribosyl pyrophosphate amidotran       | 1.061 | 83.36 | 0.93277 | 34011 P | -1.014 | 49.48 | 0.89907 | 12058 |
| Rabac1        | A_51_P374383 | NM_010261    | Rab acceptor 1 (prenylated)                  | 1.061 | 82.34 | 0.93688 | 24343 M | -1.075 | 38.4  | 0.42733 | 7794  |
| 2310061F22Rik | A_51_P133575 | NM_153775    | RIKEN cDNA 2310061F22 gene                   | 1.06  | 79.26 | 0.86492 | 28515 P | -1.075 | 25.31 | 0.19127 | 4754  |
| 5730406M06Rik | A_52_P80548  | XM_884719    | RIKEN cDNA 5730406M06 gene                   | 1.06  | 83.36 | 0.929   | 33696 P | -1.077 | 42.43 | 0.54441 | 8978  |
| 5730488B01Rik | A_51_P281878 | AK017710     | RIKEN cDNA 5730488B01 gene                   | 1.06  |       | 0.92602 | 23805 A | 1.048  | 25.31 | 0.31238 | 6483  |
| Asb16         | A_52_P326468 | NM_148953    | ankyrin repeat and SOCS box-containing 1     | 1.06  | 82.34 | 0.89165 | 26583 M | 1.078  | 25.31 | 0.52369 | 8784  |
| Calu          | A_52_P541157 | NM_007594    | calumenin                                    | 1.06  | 83.36 | 0.93488 | 34180 P | 1.12   | 8.32  | 0.08927 | 2874  |
| Ciapi1        | A_51_P492125 | NM_134141    | cytokine induced apoptosis inhibitor 1       | 1.06  | 82.34 | 0.90335 | 31283 P | 1.028  | 33.49 | 0.56677 | 9179  |
| Ece1          | A_51_P466423 | AK047359     | endothelin converting enzyme 1               | 1.06  | 83.36 | 0.9394  | 34520 P | 1.149  | 9.71  | 0.22657 | 5300  |
| Gle1l         | A_52_P476421 | AK145748     | GLE1 RNA export mediator-like (yeast         | 1.06  | 81.02 | 0.87975 | 29634 P | 1.1    | 16.2  | 0.28682 | 6183  |
| Mccc2         | A_51_P211880 | NM_030026    | methylcrotonoyl-Coenzyme A carboxylase       | 1.06  | 83.95 | 0.95176 | 35717 P | -1.145 | 3.46  | 0.04454 | 1659  |
| Plaa          | A_52_P373782 | NM_172695    | phospholipase A2, activating protein         | 1.06  | 79.26 | 0.86758 | 28705 P | 1.073  | 16.2  | 0.20419 | 4954  |
| Rpo1-2        | A_52_P271685 | AK052672     | RNA polymerase 1-2                           | 1.06  |       | 0.95139 | 27714 A | 1.142  | 6.98  | 0.08032 | 2669  |
| Smap1         | A_51_P249821 | AK006817     | stromal membrane-associated protein 1        | 1.06  | 81.02 | 0.89072 | 30284 P | 1.084  | 22.1  | 0.48248 | 8351  |
| Ube2i         | A_52_P269595 | BC037635     | ubiquitin-conjugating enzyme E2I             | 1.06  | 83.36 | 0.92159 | 33170 P | 1.201  | 5.75  | 0.12478 | 3594  |
| Xist          | A_51_P145453 | L04961       | inactive X specific transcripts              | 1.06  |       | 0.97952 | 14837 A | 1.09   | 11.33 | 0.10452 | 3196  |
| 1110032A13Rik | A_51_P155303 | NM_199197    | RIKEN cDNA 1110032A13 gene                   | 1.059 | 82.34 | 0.9036  | 31337 P | -1.296 | 0.51  | 0.01044 | 398   |
| Abcf2         | A_52_P445828 | NM_013853    | ATP-binding cassette, sub-family F (GCN2)    | 1.059 | 82.34 | 0.90781 | 31658 P | -1.013 | 49.48 | 0.79791 | 11156 |
| Arhgap4       | A_51_P339822 | NM_138630    | Rho GTPase activating protein 4              | 1.059 | 82.34 | 0.9186  | 32893 P | -1.07  | 33.49 | 0.28469 | 6142  |
| Col4a3bp      | A_52_P115638 | NM_023420    | procollagen, type IV, alpha 3 (Goodpastur    | 1.059 | 83.95 | 0.94296 | 34824 P | 1.166  | 6.98  | 0.09163 | 2932  |
| Ctbs          | A_51_P255082 | NM_028836    | chitinase, di-N-acetyl-                      | 1.059 | 81.02 | 0.88098 | 29710 P | 1.175  | 3.46  | 0.03017 | 1205  |
| Dld           | A_51_P184282 | U73445       | dihydroliipoamide dehydrogenase              | 1.059 | 82.34 | 0.91548 | 32649 P | 1.081  | 13.58 | 0.16821 | 4345  |
| Frap1         | A_51_P282179 | NM_020009    | FK506 binding protein 12-rapamycin asso      | 1.059 | 81.02 | 0.89368 | 30562 P | 1.038  | 28.13 | 0.37128 | 7186  |
| Glipr2        | A_51_P517843 | NM_027450    | GLI pathogenesis-related 2                   | 1.059 | 84.4  | 0.9704  | 37455 P | -1.154 | 3.46  | 0.05545 | 2019  |
| Ldb1          | A_51_P384756 | NM_010697    | LIM domain binding 1                         | 1.059 | 81.02 | 0.88412 | 29910 P | 1.046  | 25.31 | 0.32188 | 6583  |
| ORF63         | A_52_P404942 | NM_144854    | open reading frame 63                        | 1.059 |       | 0.98014 | 14845 A | -1.014 | 49.48 | 0.80625 | 11243 |
| Rims2         | A_51_P321847 | NM_053271    | regulating synaptic membrane exocytosis      | 1.059 | 82.34 | 0.92007 | 33036 P | 1.155  | 6.98  | 0.08255 | 2715  |
| Snrpd3        | A_51_P176681 | NM_026095    | small nuclear ribonucleoprotein D3           | 1.059 | 83.36 | 0.92665 | 33569 P | 1.039  | 30.75 | 0.48617 | 8397  |
| Sos1          | A_52_P341339 | NM_009231    | Son of sevenless homolog 1 (Drosophila)      | 1.059 | 81.02 | 0.89158 | 30345 P | 1.076  | 19.02 | 0.32824 | 6652  |
| Syng1         | A_51_P270733 | NM_009303    | synaptogyrin 1                               | 1.059 | 82.34 | 0.90299 | 31266 P | -1.05  | 43.15 | 0.45351 | 8034  |
| Tmem23        | A_51_P421958 | NM_144792    | sphingomyelin synthase 1                     | 1.059 | 81.02 | 0.87896 | 29553 P | 1.044  | 28.13 | 0.37813 | 7260  |
| Zcchc8        | A_52_P589112 | NM_027494    | zinc finger, CCHC domain containing 8        | 1.059 | 83.36 | 0.92127 | 33143 P | 1.039  | 28.13 | 0.38299 | 7317  |
| 4833442J19Rik | A_52_P263673 | NM_177101    | RIKEN cDNA 4833442J19 gene                   | 1.058 | 84.22 | 0.9617  | 36603 P | 1.01   | 42.43 | 0.85878 | 11674 |
| Adss          | A_51_P361099 | NM_007422    | adenylosuccinate synthetase, non muscle      | 1.058 | 83.36 | 0.93599 | 34271 P | 1.169  | 2.53  | 0.01753 | 750   |
| Akap8l        | A_51_P277524 | NM_017476    | A kinase (PKA) anchor protein 8-like         | 1.058 | 84.22 | 0.95973 | 36354 P | -1.015 | 49.48 | 0.77933 | 10982 |
| Arl6ip4       | A_51_P454666 | NM_144509    | ADP-ribosylation factor-like 6 interacting p | 1.058 | 81.02 | 0.89351 | 30547 P | 1.035  | 36.07 | 0.71571 | 10449 |
| Atp2c1        | A_52_P397722 | NM_175025    | ATPase, Ca++-sequestering                    | 1.058 | 81.02 | 0.8861  | 30034 P | 1.132  | 8.32  | 0.09617 | 3014  |
| Cat           | A_52_P679769 | NM_009804    | catalase                                     | 1.058 | 84.4  | 0.97483 | 37993 P | 1.113  | 8.32  | 0.07344 | 2495  |
| Cltc          | A_52_P67485  | AK049578     | clathrin, heavy polypeptide (Hc)             | 1.058 | 83.36 | 0.92283 | 33259 P | 1.213  | 2.53  | 0.02095 | 895   |
| D2Bwg1335e    | A_51_P406334 | NM_026828    | DNA segment, Chr 2, Brigham & Women's        | 1.058 | 82.34 | 0.90871 | 31751 P | -1.16  | 1.58  | 0.02245 | 948   |
| Dscr3         | A_51_P508191 | NM_007834    | Down syndrome critical region gene 3         | 1.058 | 83.36 | 0.931   | 33920 P | -1.165 | 2.04  | 0.03454 | 1324  |
| Paox          | A_51_P180617 | NM_153783    | polyamine oxidase (exo-N4-amino)             | 1.058 | 83.36 | 0.92279 | 33258 P | 1.108  | 9.71  | 0.1024  | 3161  |
| Rab38         | A_52_P21595  | NM_028238    | Rab38, member of RAS oncogene family         | 1.058 | 83.36 | 0.93345 | 34109 P | 1.02   | 38.4  | 0.71751 | 10467 |
| Scoc          | A_51_P466886 | NM_019708    | short coiled-coil protein                    | 1.058 | 82.34 | 0.90935 | 31822 P | 1.052  | 28.13 | 0.48143 | 8323  |
| Ube3b         | A_51_P205740 | NM_054093    | ubiquitin protein ligase E3B                 | 1.058 | 82.34 | 0.90911 | 31800 P | 1.06   | 16.2  | 0.19195 | 4767  |
| 1110005A23Rik | A_52_P789023 | NM_025364    | RIKEN cDNA 1110005A23 gene                   | 1.057 | 82.34 | 0.91252 | 32282 P | 1.197  | 3.46  | 0.04387 | 1642  |
| 5730405I09Rik | A_52_P512807 | XM_974899    | cyclin Y                                     | 1.057 | 79.26 | 0.8726  | 29106 P | -1.041 | 44.4  | 0.48701 | 8407  |
| BC038156      | A_52_P144286 | NM_177768    | cDNA sequence BC038156                       | 1.057 | 82.34 | 0.90781 | 31631 P | 1.107  | 9.71  | 0.08446 | 2767  |
| BC068171      | A_51_P469633 | NM_001030307 | dyskeratosis congenita 1, dyskerin homolo    | 1.057 | 82.34 | 0.89958 | 30964 P | 1.154  | 3.82  | 0.03496 | 1339  |
| Cdh3          | A_51_P433237 | NM_007665    | cadherin 3                                   | 1.057 | 83.95 | 0.90191 | 27286 M | 1.091  | 19.02 | 0.43314 | 7875  |
| Crb3          | A_51_P328089 | NM_177638    | crumbs homolog 3 (Drosophila)                | 1.057 | 83.36 | 0.92592 | 33528 P | -1.173 | 1.32  | 0.0225  | 957   |
| D10Bwg1379e   | A_52_P49042  | NM_001033258 | DNA segment, Chr 10, Brigham & Womer         | 1.057 | 83.36 | 0.92446 | 33408 P | -1.134 | 3.82  | 0.04561 | 1711  |
| Gnao1         | A_52_P205031 | M36778       | guanine nucleotide binding protein, alpha    | 1.057 | 82.34 | 0.88598 | 28122 M | 1.136  | 11.33 | 0.22295 | 5259  |

|               |              |           |                                           |       |       |         |         |        |       |         |       |
|---------------|--------------|-----------|-------------------------------------------|-------|-------|---------|---------|--------|-------|---------|-------|
| Nedd8         | A_51_P416869 | NM_008683 | neural precursor cell expressed, develop  | 1.057 | 82.34 | 0.90011 | 30998 P | 1.03   | 33.49 | 0.58673 | 9311  |
| Nrbf2         | A_52_P956153 | AK086152  | nuclear receptor binding factor 2         | 1.057 | 82.34 | 0.91371 | 32410 P | -1.011 | 49.48 | 0.86776 | 11739 |
| Pold4         | A_51_P455906 | NM_027196 | polymerase (DNA-directed), delta 4        | 1.057 | 83.36 | 0.92336 | 33342 P | -1.026 | 46.85 | 0.59305 | 9365  |
| Ppp4r1        | A_51_P163867 | NM_146081 | protein phosphatase 4, regulatory subuni  | 1.057 | 79.26 | 0.87149 | 29045 P | 1.087  | 13.58 | 0.16545 | 4304  |
| Snx3          | A_51_P427444 | NM_017472 | sorting nexin 3                           | 1.057 | 81.02 | 0.89035 | 30262 P | 1.227  | 2.53  | 0.03017 | 1206  |
| Xylt2         | A_52_P94811  | NM_145828 | xylosyltransferase II                     | 1.057 | 83.36 | 0.92072 | 33115 P | 1.061  | 19.02 | 0.21927 | 5195  |
| Zhx3          | A_52_P321325 | AK161741  | zinc fingers and homeoboxes 3             | 1.057 | 83.36 | 0.92988 | 33761 P | 1.132  | 9.71  | 0.15006 | 4038  |
| 2010209012Rik | A_51_P295389 | BC047275  | RIKEN cDNA 2010209012 gene                | 1.056 | 82.34 | 0.91821 | 32863 P | -1.003 | 49.48 | 0.95177 | 12602 |
| Cdv3          | A_51_P343556 | NM_175565 | carnitine deficiency-associated gene expr | 1.056 | 81.02 | 0.89337 | 30535 P | 1.081  | 13.58 | 0.14993 | 4037  |
| Epc1          | A_51_P452003 | NM_027497 | enhancer of polycomb homolog 1 (Droso)    | 1.056 | 81.02 | 0.88759 | 30112 P | 1.113  | 8.32  | 0.08015 | 2663  |
| Fgf1          | A_52_P538673 | NM_010197 | fibroblast growth factor 1                | 1.056 | 84.52 | 0.9191  | 25805 M | 1.04   | 33.49 | 0.65314 | 9903  |
| Gna11         | A_51_P498004 | NM_010301 | guanine nucleotide binding protein, alpha | 1.056 | 79.26 | 0.87526 | 29274 P | 1.061  | 22.1  | 0.30397 | 6367  |
| Gpsn2         | A_51_P278550 | NM_134118 | glycoprotein, synaptic 2                  | 1.056 | 82.34 | 0.91813 | 32839 P | 1.087  | 13.58 | 0.18565 | 4661  |
| Jarid2        | A_52_P370203 | NM_021878 | jumonji, AT rich interactive domain 2     | 1.056 | 83.95 | 0.95609 | 35980 P | -1.072 | 36.07 | 0.36333 | 7063  |
| Mapkapk2      | A_51_P118902 | NM_008551 | MAP kinase-activated protein kinase 2     | 1.056 | 83.95 | 0.94483 | 34975 P | 1.117  | 13.58 | 0.34283 | 6798  |
| Rabif         | A_51_P188237 | NM_145510 | RAB interacting factor                    | 1.056 | 83.36 | 0.9238  | 33371 P | 1.167  | 5.75  | 0.07882 | 2626  |
| Rock2         | A_51_P320444 | NM_009072 | Rho-associated coiled-coil containing pro | 1.056 | 82.34 | 0.91949 | 33005 P | -1.034 | 45.05 | 0.49155 | 8454  |
| Rraga         | A_51_P226417 | NM_178376 | Ras-related GTP binding A                 | 1.056 | 83.36 | 0.94449 | 24649 M | 1.023  | 40.63 | 0.7768  | 10967 |
| Sec61a2       | A_52_P652164 | NM_021305 | Sec61, alpha subunit 2 (S. cerevisiae)    | 1.056 | 82.34 | 0.9089  | 31767 P | 1.01   | 42.43 | 0.82054 | 11366 |
| Tcfe2a        | A_51_P394471 | NM_011548 | transcription factor E2a                  | 1.056 | 83.36 | 0.92346 | 33344 P | 1.123  | 8.32  | 0.08375 | 2742  |
| Ttc13         | A_51_P494622 | AK144842  | tetratricopeptide repeat domain 13        | 1.056 | 82.34 | 0.90726 | 31587 P | 1.132  | 9.71  | 0.16097 | 4235  |
| BC010304      | A_52_P415365 | AK172909  | cDNA sequence BC010304                    | 1.055 | 82.34 | 0.9118  | 32160 P | 1.113  | 9.71  | 0.15366 | 4110  |
| Cdc2a         | A_52_P339954 | NM_007659 | cell division cycle 2 homolog A (S. pombe | 1.055 |       | 0.98109 | 14883 A | -1.071 | 28.13 | 0.21458 | 5108  |
| Cebpb         | A_52_P605846 | NM_009883 | CCAAT/enhancer binding protein (C/EBP),   | 1.055 | 81.02 | 0.89958 | 27148 M | 1.106  | 13.58 | 0.23035 | 5356  |
| Fgfr1         | A_51_P109469 | NM_010206 | fibroblast growth factor receptor 1       | 1.055 | 82.34 | 0.90548 | 31474 P | 1.12   | 8.32  | 0.08145 | 2691  |
| Fosl2         | A_52_P484903 | NM_008037 | fos-like antigen 2                        | 1.055 | 84.56 | 0.98238 | 39040 P | 1.09   | 22.1  | 0.50927 | 8666  |
| Ltf           | A_51_P188141 | NM_008522 | lactotransferrin                          | 1.055 | 84.56 | 0.98278 | 39104 P | -1.035 | 45.05 | 0.52627 | 8809  |
| Msrb3         | A_52_P121491 | NM_177092 | methionine sulfoxide reductase B3         | 1.055 | 81.02 | 0.89235 | 30433 P | -1.017 | 49.48 | 0.74343 | 10736 |
| Snrpa         | A_51_P389978 | NM_015782 | small nuclear ribonucleoprotein polypept  | 1.055 | 83.36 | 0.94098 | 34642 P | -1.124 | 6.98  | 0.07463 | 2521  |
| Tgds          | A_51_P251402 | NM_029578 | TDP-glucose 4,6-dehydratase               | 1.055 | 81.02 | 0.89727 | 30780 P | 1.07   | 19.02 | 0.28158 | 6109  |
| Vbp1          | A_51_P475076 | NM_011692 | von Hippel-Lindau binding protein 1       | 1.055 | 83.36 | 0.94241 | 24562 M | 1.12   | 8.32  | 0.06712 | 2343  |
| 1600012H06Rik | A_52_P394385 | NM_026451 | RIKEN cDNA 1600012H06 gene                | 1.054 | 83.36 | 0.93314 | 34052 P | 1.115  | 5.75  | 0.04456 | 1661  |
| 6330442E10Rik | A_52_P220783 | NM_178745 | RIKEN cDNA 6330442E10 gene                | 1.054 | 83.36 | 0.96546 | 33948 P | 1.106  | 22.1  | 0.50543 | 8640  |
| Apoa1bp       | A_51_P109939 | NM_144897 | apolipoprotein A-I binding protein        | 1.054 | 82.34 | 0.90191 | 31156 P | -1.269 | 0.75  | 0.0184  | 782   |
| Dap3          | A_52_P292882 | AK032275  | death associated protein 3                | 1.054 | 83.36 | 0.93053 | 33879 P | 1.189  | 3.01  | 0.02147 | 903   |
| Fndc3a        | A_52_P995657 | AK037863  | fibronectin type III domain containing 3a | 1.054 | 83.36 | 0.93874 | 34479 P | 1.084  | 13.58 | 0.20699 | 5008  |
| Htf9c         | A_51_P387648 | NM_008307 | Hpall tiny fragments locus 9c             | 1.054 | 83.95 | 0.9516  | 35696 P | -1.277 | 0.51  | 0.00972 | 354   |
| Mug1          | A_51_P182631 | NM_008645 | murinoglobulin 1                          | 1.054 | 83.36 | 0.92427 | 33392 P | 1.14   | 5.75  | 0.04567 | 1714  |
| Pcyt1a        | A_52_P308881 | AK163685  | phosphate cytidyltransferase 1, choline,  | 1.054 | 81.02 | 0.88557 | 30008 P | 1.237  | 2.04  | 0.01723 | 741   |
| Pkp4          | A_51_P251245 | NM_026361 | plakophilin 4                             | 1.054 | 82.34 | 0.91041 | 31992 P | 1.071  | 30.75 | 0.66138 | 9981  |
| Rpo1-1        | A_51_P112557 | NM_009085 | RNA polymerase 1-1                        | 1.054 | 82.34 | 0.91891 | 32937 P | 1.005  | 42.43 | 0.91419 | 12211 |
| Rsu1          | A_51_P258671 | NM_009105 | Ras suppressor protein 1                  | 1.054 | 83.36 | 0.93739 | 34382 P | 1.261  | 1.62  | 0.0204  | 873   |
| Wnt8b         | A_51_P433887 | NM_011720 | wingless related MMTV integration site 8  | 1.054 | 79.26 | 0.8816  | 29744 P | -1.007 | 49.48 | 0.91088 | 12199 |
| Zfp647        | A_51_P469252 | NM_172817 | zinc finger protein 647                   | 1.054 | 82.34 | 0.91013 | 31972 P | -1.001 | 49.48 | 0.97561 | 12799 |
| Acadsb        | A_51_P435068 | NM_025826 | acyl-Coenzyme A dehydrogenase, short/b    | 1.053 | 83.36 | 0.92551 | 33503 P | -1.003 | 49.48 | 0.95687 | 12636 |
| BC021611      | A_51_P296090 | NM_144932 | cDNA sequence BC021611                    | 1.053 | 84.4  | 0.9731  | 37771 P | -1.019 | 49    | 0.70868 | 10398 |
| Calcr         | A_52_P554768 | NM_007588 | calcitonin receptor                       | 1.053 | 84.56 | 0.93986 | 32025 M | -1.049 | 40.63 | 0.33104 | 6688  |
| D830012I24Rik | A_52_P282448 | AK052864  | RIKEN cDNA D830012I24 gene                | 1.053 | 81.02 | 0.88895 | 30193 P | 1.074  | 16.2  | 0.18061 | 4588  |
| Fmnl2         | A_51_P222936 | AK080318  | formin-like 2                             | 1.053 | 75.14 | 0.9191  | 28333 P | 1.094  | 9.71  | 0.07882 | 2625  |
| Kcnd1         | A_51_P236053 | NM_008423 | potassium voltage-gated channel, Shal-re  | 1.053 | 81.02 | 0.89084 | 30290 P | -1.061 | 42.43 | 0.44623 | 7977  |
| Lrrc4b        | A_52_P467545 | NM_198250 | leucine rich repeat containing 4B         | 1.053 |       | 0.96703 | 19063 A | -1.218 | 0.75  | 0.01458 | 617   |
| Nr4a3         | A_51_P128397 | NM_015743 | nuclear receptor subfamily 4, group A, me | 1.053 |       | 0.98109 | 14896 A | -1.074 | 40.63 | 0.48342 | 8364  |
| Nt5c2         | A_52_P598930 | AK038326  | 5'-nucleotidase, cytosolic II             | 1.053 | 82.34 | 0.91171 | 32126 P | -1.091 | 22.1  | 0.20501 | 4968  |

|               |              |              |                                                     |       |       |         |         |        |       |         |       |
|---------------|--------------|--------------|-----------------------------------------------------|-------|-------|---------|---------|--------|-------|---------|-------|
| Nucb2         | A_51_P193336 | NM_016773    | nucleobindin 2                                      | 1.053 | 83.95 | 0.95466 | 35853 P | -1.056 | 38.4  | 0.33747 | 6754  |
| Prdm4         | A_52_P461722 | NM_181650    | PR domain containing 4                              | 1.053 | 83.36 | 0.92998 | 33812 P | 1.039  | 30.75 | 0.56342 | 9145  |
| Prkaca        | A_52_P138656 | NM_008854    | protein kinase, cAMP dependent, catalytic           | 1.053 | 83.36 | 0.94977 | 24842 M | 1.204  | 3.82  | 0.05213 | 1921  |
| Rasa1         | A_52_P252872 | AK042801     | RAS p21 protein activator 1                         | 1.053 | 82.34 | 0.91805 | 30432 M | 1.132  | 6.98  | 0.06612 | 2325  |
| Refbp2        | A_52_P171659 | AK047216     | RIKEN cDNA B930036N10 gene                          | 1.053 | 82.34 | 0.90924 | 31817 P | -1.027 | 46.3  | 0.53695 | 8909  |
| Slc25a3       | A_52_P486063 | AK028313     | solute carrier family 25 (mitochondrial carrier)    | 1.053 | 84.4  | 0.97186 | 37603 P | 1.12   | 13.58 | 0.34879 | 6854  |
| Smu1          | A_52_P461552 | NM_021535    | smu-1 suppressor of mec-8 and unc-52 homolog        | 1.053 | 83.36 | 0.93304 | 34037 P | -1.006 | 49.48 | 0.91966 | 12269 |
| Sp3           | A_51_P112662 | NM_001018042 | trans-acting transcription factor 3                 | 1.053 | 81.02 | 0.92949 | 24015 M | 1.109  | 8.32  | 0.08005 | 2655  |
| Tor1b         | A_52_P466788 | NM_133673    | torsin family 1, member B                           | 1.053 | 83.36 | 0.939   | 34501 P | 1.038  | 28.13 | 0.43111 | 7845  |
| Ufd1l         | A_51_P328963 | NM_011672    | ubiquitin fusion degradation 1 like                 | 1.053 | 81.02 | 0.89796 | 30804 P | -1.056 | 43.15 | 0.50748 | 8655  |
| Atp5g1        | A_51_P183292 | NM_007506    | ATP synthase, H+ transporting, mitochondrial        | 1.052 | 82.34 | 0.90362 | 31352 P | 1.025  | 40.63 | 0.78773 | 11068 |
| Cacna2d1      | A_52_P160543 | NM_009784    | calcium channel, voltage-dependent, alpha 2D        | 1.052 | 83.36 | 0.92608 | 33544 P | 1.23   | 2.53  | 0.02989 | 1192  |
| Cacng7        | A_51_P327675 | NM_133189    | calcium channel, voltage-dependent, gamma 7         | 1.052 |       | 0.93314 | 26888 A | 1.02   | 42.43 | 0.80574 | 10173 |
| Ep300         | A_51_P304029 | AK040384     | E1A binding protein p300                            | 1.052 |       | 0.968   | 34140 A | 1.117  | 11.33 | 0.17381 | 4442  |
| F12           | A_51_P184949 | NM_021489    | coagulation factor XII (Hageman factor)             | 1.052 |       | 0.94291 | 24485 A | 1.045  | 28.13 | 0.38962 | 7392  |
| Hdac10        | A_52_P577361 | NM_199198    | histone deacetylase 10                              | 1.052 | 84.22 | 0.96163 | 36534 P | -1.011 | 49.48 | 0.84549 | 11566 |
| Il1f6         | A_51_P504194 | NM_019450    | interleukin 1 family, member 6                      | 1.052 | 79.26 | 0.93031 | 26676 M | -1.043 | 45.05 | 0.58997 | 9334  |
| Pms2          | A_51_P234174 | NM_008886    | postmeiotic segregation increased 2 (S. cerevisiae) | 1.052 | 83.95 | 0.94702 | 35160 P | -1.057 | 30.75 | 0.2124  | 5082  |
| Rhoc          | A_51_P282508 | NM_007484    | ras homolog gene family, member C                   | 1.052 | 83.36 | 0.94502 | 24666 M | -1.044 | 42.43 | 0.33251 | 6707  |
| Riok1         | A_51_P498242 | NM_024242    | RIO kinase 1 (yeast)                                | 1.052 | 82.34 | 0.91614 | 32704 P | 1.047  | 25.31 | 0.34799 | 6850  |
| Rps6kb1       | A_52_P372321 | NM_028259    | ribosomal protein S6 kinase, polypeptide 1          | 1.052 |       | 0.93766 | 24275 A | 1.051  | 30.75 | 0.59157 | 9345  |
| Tex2          | A_52_P394539 | NM_198292    | testis expressed gene 2                             | 1.052 | 77.44 | 0.92645 | 28789 P | 1.149  | 13.58 | 0.38944 | 7391  |
| Tsg101        | A_52_P401824 | NM_021884    | tumor susceptibility gene 101                       | 1.052 | 82.34 | 0.90457 | 31397 P | 1.193  | 3.46  | 0.0353  | 1363  |
| 2310047M15Rik | A_52_P56394  | DV058987     | RIKEN cDNA 2310047M15 gene                          | 1.051 | 79.26 | 0.88855 | 30168 P | 1.081  | 13.58 | 0.19663 | 4847  |
| 5730509K17Rik | A_52_P249856 | NM_172274    | RIKEN cDNA 5730509K17 gene                          | 1.051 | 83.36 | 0.94006 | 34563 P | 1.09   | 11.33 | 0.13135 | 3696  |
| Bzw2          | A_51_P174681 | NM_025840    | basic leucine zipper and W2 domains 2               | 1.051 | 84.22 | 0.95609 | 36016 P | 1.007  | 42.43 | 0.90387 | 12129 |
| C530030K21Rik | A_52_P336345 | AK083002     | RIKEN cDNA C530030K21 gene                          | 1.051 | 84.22 | 0.95676 | 36061 P | 1.156  | 6.98  | 0.08929 | 2875  |
| Cnot1         | A_52_P22365  | BC058249     | CCR4-NOT transcription complex, subunit 1           | 1.051 | 83.95 | 0.94234 | 34759 P | 1.042  | 28.13 | 0.3817  | 7294  |
| E2f5          | A_51_P292906 | X86925       | E2F transcription factor 5                          | 1.051 | 82.34 | 0.91525 | 32595 P | 1.115  | 16.2  | 0.34861 | 6853  |
| Thsd1         | A_52_P22001  | AK049636     | thrombospondin, type I, domain 1                    | 1.051 | 84.4  | 0.96857 | 37339 M | -1.006 | 49.48 | 0.97752 | 12818 |
| Timp2         | A_52_P540219 | NM_011594    | tissue inhibitor of metalloproteinase 2             | 1.051 | 82.34 | 0.91076 | 32014 P | 1.187  | 9.71  | 0.25464 | 5731  |
| Tnfsf5ip1     | A_52_P403352 | NM_134138    | tumor necrosis factor superfamily, member 5         | 1.051 | 83.95 | 0.94764 | 35238 P | 1.197  | 3.01  | 0.02439 | 1010  |
| Casp7         | A_52_P260114 | NM_007611    | caspase 7                                           | 1.05  | 83.36 | 0.91805 | 30427 M | -1.068 | 28.13 | 0.19811 | 4868  |
| Ccdc12        | A_52_P386408 | NM_028312    | coiled-coil domain containing 12                    | 1.05  | 83.36 | 0.92255 | 33246 P | 1.073  | 13.58 | 0.15669 | 4160  |
| Coil          | A_51_P483839 | NM_016706    | coilin                                              | 1.05  | 81.02 | 0.89165 | 30383 P | 1.087  | 13.58 | 0.17971 | 4573  |
| E130016E03Rik | A_51_P190361 | AK078439     | RIKEN cDNA E130016E03 gene                          | 1.05  | 83.36 | 0.92948 | 33719 P | 1.043  | 25.31 | 0.32626 | 6632  |
| Hhip          | A_52_P249826 | NM_020259    | Hedgehog-interacting protein                        | 1.05  | 83.95 | 0.95213 | 35748 P | -1.049 | 38.4  | 0.2903  | 6213  |
| Mlstd2        | A_52_P112791 | AK012966     | male sterility domain containing 2                  | 1.05  | 81.02 | 0.9207  | 30680 P | -1.05  | 43.75 | 0.54441 | 8979  |
| Pnpt1         | A_51_P453343 | NM_027869    | polyribonucleotide nucleotidyltransferase 1         | 1.05  | 83.36 | 0.92744 | 33618 P | 1.241  | 2.04  | 0.02042 | 875   |
| Rpp14         | A_51_P167273 | NM_025938    | ribonuclease P 14 subunit (human)                   | 1.05  | 82.34 | 0.91141 | 32092 P | 1.055  | 28.13 | 0.57455 | 9224  |
| Ryk           | A_52_P544017 | NM_013649    | receptor-like tyrosine kinase                       | 1.05  | 83.36 | 0.93967 | 34546 P | 1.217  | 9.71  | 0.32279 | 6590  |
| Spag5         | A_52_P131891 | NM_017407    | sperm associated antigen 5                          | 1.05  | 83.36 | 0.94205 | 32195 M | 1.079  | 19.02 | 0.2939  | 6268  |
| Zfp629        | A_52_P172199 | NM_177226    | zinc finger protein 629                             | 1.05  | 83.36 | 0.9329  | 34013 P | -1.169 | 3.46  | 0.07031 | 2402  |
| Aadac         | A_51_P394115 | NM_023383    | arylacetamide deacetylase (esterase)                | 1.049 |       | 0.98366 | 29247 A | 1.193  | 3.46  | 0.03344 | 1303  |
| Abcc5         | A_52_P628117 | NM_176839    | ATP-binding cassette, sub-family C (CFTR/           | 1.049 | 84.22 | 0.96163 | 36577 P | 1.003  | 42.43 | 0.96083 | 12671 |
| Col4a2        | A_51_P491350 | NM_009932    | procollagen, type IV, alpha 2                       | 1.049 | 83.95 | 0.95123 | 35597 P | 1.04   | 33.49 | 0.66384 | 9996  |
| Crip2         | A_51_P314397 | NM_024223    | cysteine rich protein 2                             | 1.049 | 82.34 | 0.91949 | 33001 P | -1.064 | 30.75 | 0.22129 | 5226  |
| Dgkz          | A_51_P505156 | NM_138306    | diacylglycerol kinase zeta                          | 1.049 | 83.36 | 0.92784 | 33655 P | 1.008  | 42.43 | 0.86776 | 11737 |
| H2-Ab1        | A_52_P683598 | NM_207105    | histocompatibility 2, class II antigen A, beta      | 1.049 | 84.4  | 0.97197 | 37633 P | 1.036  | 40.63 | 0.85824 | 11665 |
| Ihh           | A_52_P403398 | AK090147     | Indian hedgehog                                     | 1.049 | 82.34 | 0.91716 | 32748 M | 1.064  | 19.02 | 0.2924  | 6243  |
| Loh12cr1      | A_51_P498947 | NM_026371    | loss of heterozygosity, 12, chromosomal region      | 1.049 | 82.34 | 0.909   | 31781 P | -1.113 | 19.02 | 0.22619 | 5288  |
| Numb          | A_51_P325071 | NM_010949    | numb gene homolog (Drosophila)                      | 1.049 | 82.34 | 0.90966 | 31876 P | -1.053 | 40.63 | 0.3354  | 6736  |
| Ppie          | A_51_P354433 | NM_019489    | peptidylprolyl isomerase E (cylophilin E)           | 1.049 | 84.22 | 0.95791 | 36169 P | 1.073  | 13.58 | 0.15413 | 4119  |

|               |              |                    |                                             |       |       |         |         |        |       |         |       |
|---------------|--------------|--------------------|---------------------------------------------|-------|-------|---------|---------|--------|-------|---------|-------|
| Scarb2        | A_51_P180362 | NM_007644          | scavenger receptor class B, member 2        | 1.049 | 83.36 | 0.92642 | 33553 P | -1.032 | 46.3  | 0.60696 | 9503  |
| Sh3bp4        | A_51_P322871 | NM_133816          | SH3-domain binding protein 4                | 1.049 | 83.36 | 0.93689 | 34322 P | 1.058  | 22.1  | 0.3689  | 7151  |
| Tcerg1        | A_51_P414481 | NM_001039474       | transcription elongation regulator 1 (CA1)  | 1.049 | 81.02 | 0.89757 | 30794 P | 1.083  | 22.1  | 0.48526 | 8385  |
| Th1l          | A_51_P126817 | NM_020580          | TH1-like homolog (Drosophila)               | 1.049 | 82.34 | 0.9118  | 32179 P | 1.081  | 13.58 | 0.13407 | 3746  |
| Timm23        | A_51_P511623 | NM_016897          | translocase of inner mitochondrial memb     | 1.049 | 83.36 | 0.93349 | 34112 P | -1.119 | 9.71  | 0.12177 | 3541  |
| Wdr32         | A_51_P252328 | NM_153167          | WD repeat domain 32                         | 1.049 | 82.34 | 0.9191  | 32950 P | -1.193 | 3.46  | 0.09978 | 3100  |
| Zfp160        | A_51_P369796 | NM_145483          | zinc finger protein 160                     | 1.049 | 82.34 | 0.9191  | 32963 P | -1.084 | 22.1  | 0.15283 | 4085  |
| 2210009G21Rik | A_51_P271828 | NM_028834          | RIKEN cDNA 2210009G21 gene                  | 1.048 | 83.36 | 0.93189 | 33971 P | 1.001  | 42.43 | 0.98826 | 12968 |
| Alad          | A_51_P512072 | NM_008525          | aminolevulinate, delta-, dehydratase        | 1.048 | 83.36 | 0.92998 | 33795 P | 1.017  | 40.63 | 0.73049 | 10576 |
| Alas2         | A_51_P327451 | NM_009653          | aminolevulinic acid synthase 2, erythroid   | 1.048 | 84.22 | 0.96489 | 36909 P | -1.192 | 1.18  | 0.02177 | 912   |
| BC013529      | A_51_P183469 | AK046650           | cDNA sequence BC013529                      | 1.048 | 79.26 | 0.96369 | 25378 M | 1.039  | 33.49 | 0.6704  | 10054 |
| Bmp6          | A_52_P468441 | NM_007556          | bone morphogenetic protein 6                | 1.048 | 83.95 | 0.94373 | 34892 M | 1.091  | 11.33 | 0.13456 | 3755  |
| Cog8          | A_51_P259750 | AK155400           | predicted gene, ENSMUSG0000074106           | 1.048 | 82.34 | 0.91097 | 32049 P | -1.026 | 46.3  | 0.53181 | 8863  |
| Fxyd7         | A_51_P379698 | NM_022007          | FXVD domain-containing ion transport reg    | 1.048 | 84.22 | 0.96166 | 36593 P | -1.064 | 36.07 | 0.32647 | 6634  |
| Hagh          | A_51_P127469 | NM_024284          | hydroxyacyl glutathione hydrolase           | 1.048 | 83.36 | 0.92283 | 33289 P | 1.009  | 42.43 | 0.8934  | 11996 |
| Ipo9          | A_51_P149983 | NM_153774          | importin 9                                  | 1.048 | 84.4  | 0.97197 | 37638 P | -1.326 | 0.51  | 0.00591 | 108   |
| Litaf         | A_51_P267239 | NM_019980          | LPS-induced TN factor                       | 1.048 | 83.36 | 0.93021 | 33840 P | 1.144  | 9.71  | 0.16808 | 4341  |
| Mgea6         | A_52_P471088 | NM_146034          | meningioma expressed antigen 6 (coiled-     | 1.048 | 83.36 | 0.93314 | 34065 P | 1.162  | 6.98  | 0.10264 | 3165  |
| Nbn           | A_52_P298548 | NM_013752          | nibrin                                      | 1.048 | 83.95 | 0.94291 | 34795 P | -1.035 | 45.05 | 0.49717 | 8543  |
| Psm8          | A_51_P149325 | NM_026545          | proteasome (prosome, macropain) 26S su      | 1.048 | 83.95 | 0.94728 | 35196 P | -1.037 | 45.05 | 0.49465 | 8500  |
| Rbp4          | A_51_P374752 | NM_011255          | retinol binding protein 4, plasma           | 1.048 | 82.34 | 0.96281 | 28298 M | 1.309  | 1.62  | 0.02536 | 1047  |
| Tacc1         | A_51_P331409 | NM_177089          | transforming, acidic coiled-coil containing | 1.048 | 82.34 | 0.91011 | 31952 M | 1.081  | 13.58 | 0.15685 | 4164  |
| Tgfa          | A_52_P555423 | NM_031199          | transforming growth factor alpha            | 1.048 | 82.34 | 0.94148 | 29723 M | 1.109  | 8.32  | 0.06492 | 2282  |
| Zfp191        | A_51_P188749 | AK088914           | zinc finger protein 191                     | 1.048 | 82.34 | 0.91219 | 32214 P | -1.017 | 49.48 | 0.81045 | 11285 |
| Als2cl        | A_51_P360678 | NM_146228          | ALS2 C-terminal like                        | 1.047 | 83.36 | 0.93144 | 29125 M | -1.077 | 30.75 | 0.26803 | 5913  |
| C130022K22Rik | A_52_P459552 | NM_172730          | RIKEN cDNA C130022K22 gene                  | 1.047 | 82.34 | 0.9087  | 31739 P | 1.006  | 42.43 | 0.92601 | 12356 |
| Clta          | A_51_P197321 | NM_016760          | clathrin, light polypeptide (Lca)           | 1.047 | 82.34 | 0.94373 | 24616 M | 1.117  | 9.71  | 0.11894 | 3465  |
| Csrp2bp       | A_51_P259358 | NM_181417          | cysteine and glycine-rich protein 2 bindin  | 1.047 | 83.95 | 0.94386 | 34930 P | -1.081 | 19.02 | 0.13147 | 3698  |
| Ctdsp2        | A_52_P432685 | NM_146012          | CTD (carboxy-terminal domain, RNA poly      | 1.047 | 84.22 | 0.96163 | 36569 P | 1.091  | 11.33 | 0.12581 | 3626  |
| Golga3        | A_52_P140497 | AK077389           | golgi autoantigen, golgin subfamily a, 3    | 1.047 | 82.34 | 0.92057 | 33097 P | -1.073 | 22.1  | 0.13338 | 3735  |
| Gpr125        | A_51_P462102 | BC052391           | G protein-coupled receptor 125              | 1.047 | 81.02 | 0.9065  | 31547 P | -1.199 | 0.92  | 0.01372 | 579   |
| Irs1          | A_52_P175242 | AK141842           | insulin receptor substrate 1                | 1.047 | 84.22 | 0.95592 | 35937 P | -1.096 | 19.02 | 0.16182 | 4258  |
| Mmp23         | A_51_P502132 | NM_011985          | matrix metalloproteinase 23                 | 1.047 | 82.34 | 0.91483 | 32470 P | -1.146 | 2.04  | 0.03019 | 1207  |
| Neurl         | A_52_P339011 | NM_021360          | neuralized-like homolog (Drosophila)        | 1.047 | 83.95 | 0.9529  | 35790 P | -1.005 | 49.48 | 0.91365 | 12208 |
| Nkiras1       | A_52_P52982  | NM_023526          | NFKB inhibitor interacting Ras-like protei  | 1.047 | 83.95 | 0.94234 | 34747 P | -1.134 | 3.46  | 0.04256 | 1599  |
| Nono          | A_51_P296292 | NM_023144          | non-POU-domain-containing, octamer bin      | 1.047 | 82.34 | 0.94226 | 24545 M | 1.067  | 19.02 | 0.25033 | 5649  |
| Rpl41         | A_52_P295201 | NM_018860          | ribosomal protein L41                       | 1.047 | 84.22 | 0.9639  | 25483 M | -1.141 | 6.98  | 0.1064  | 3209  |
| Slc9a3r2      | A_52_P241676 | NM_023449          | solute carrier family 9 (sodium/hydrogen    | 1.047 | 82.34 | 0.91249 | 32247 P | 1.008  | 42.43 | 0.91179 | 12203 |
| Tmcc1         | A_52_P674386 | AK087243           | transmembrane and coiled coil domains       | 1.047 | 84.22 | 0.95609 | 35954 P | 1.048  | 25.31 | 0.37334 | 7206  |
| Trim54        | A_51_P181175 | NM_021447          | tripartite motif-containing 54              | 1.047 | 84.56 | 0.92595 | 28771 M | 1.07   | 13.58 | 0.15879 | 4195  |
| 2700038N03Rik | A_51_P278034 | NM_027356          | RIKEN cDNA 2700038N03 gene                  | 1.046 | 83.95 | 0.94989 | 35425 P | 1.027  | 33.49 | 0.56904 | 9192  |
| 5630401D06Rik | A_51_P294113 | AK032988           | chromodomain helicase DNA binding pro       | 1.046 | 83.36 | 0.93804 | 34408 P | 1.03   | 38.4  | 0.76438 | 10889 |
| C330023M02Rik | A_51_P272563 | NM_172722          | RIKEN cDNA C330023M02 gene                  | 1.046 | 82.34 | 0.92057 | 33073 P | -1.01  | 49.48 | 0.84323 | 11546 |
| Cbr1          | A_52_P447375 | U31966             | carbonyl reductase 1                        | 1.046 | 82.34 | 0.9089  | 31763 P | -1.083 | 19.02 | 0.1217  | 3539  |
| Epha1         | A_51_P214269 | NM_023580          | Eph receptor A1                             | 1.046 | 83.95 | 0.94999 | 35432 P | 1.078  | 22.1  | 0.43136 | 7847  |
| Gtf2b         | A_51_P502054 | NM_145546          | general transcription factor IIB            | 1.046 | 84.22 | 0.96279 | 36706 P | -1.017 | 49.48 | 0.85969 | 11678 |
| Hnrpk         | A_52_P401423 | NM_025279          | heterogeneous nuclear ribonucleoprotein     | 1.046 | 83.36 | 0.93859 | 34446 P | 1.244  | 1.62  | 0.01643 | 702   |
| Map3k3        | A_51_P100565 | ENSMUST00000100328 | mitogen activated protein kinase kinase k   | 1.046 | 84.22 | 0.96208 | 36651 P | 1.1    | 11.33 | 0.1605  | 4224  |
| Ppp6c         | A_52_P204440 | AK046859           | protein phosphatase 6, catalytic subunit    | 1.046 | 84.22 | 0.93314 | 31541 P | -1.02  | 49.48 | 0.8701  | 11759 |
| Ptpra         | A_51_P382194 | NM_008980          | protein tyrosine phosphatase, receptor ty   | 1.046 | 83.95 | 0.94054 | 34609 P | 1.14   | 5.75  | 0.04595 | 1726  |
| 1200014M14Rik | A_52_P365226 | AK089013           | RIKEN cDNA 1200014M14 gene                  | 1.045 | 84.4  | 0.97329 | 37794 P | -1.143 | 3.01  | 0.03657 | 1404  |
| 2310047K21Rik | A_51_P445912 | AK009882           | RIKEN cDNA 2310047K21 gene                  | 1.045 | 84.22 | 0.95839 | 36235 P | 1.045  | 30.75 | 0.54146 | 8959  |
| 2810001G20Rik | A_52_P81630  | AK012631           | RIKEN cDNA 2810001G20 gene                  | 1.045 | 83.95 | 0.9493  | 35364 P | 1.037  | 33.49 | 0.60832 | 9508  |

|               |              |           |                                                                           |       |       |         |         |        |       |         |       |
|---------------|--------------|-----------|---------------------------------------------------------------------------|-------|-------|---------|---------|--------|-------|---------|-------|
| Anxa3         | A_51_P451032 | NM_013470 | annexin A3                                                                | 1.045 | 84.4  | 0.96743 | 37238 P | -1.037 | 43.75 | 0.40226 | 7539  |
| Cish          | A_51_P470715 | NM_009895 | cytokine inducible SH2-containing protein                                 | 1.045 | 84.52 | 0.97769 | 38266 P | 1.447  | 3.46  | 0.14235 | 3891  |
| Cul1          | A_51_P335509 | NM_012042 | cullin 1                                                                  | 1.045 | 82.34 | 0.91548 | 32648 P | -1.061 | 42.43 | 0.47675 | 8276  |
| Cul3          | A_51_P188655 | AF129738  | cullin 3                                                                  | 1.045 | 82.34 | 0.91986 | 33022 P | 1.209  | 2.04  | 0.01492 | 639   |
| Dhx35         | A_51_P185563 | NM_145742 | DEAH (Asp-Glu-Ala-His) box polypeptide 3                                  | 1.045 | 84.4  | 0.97167 | 37595 P | 1.084  | 13.58 | 0.18008 | 4577  |
| E330039K12Rik | A_51_P158189 | NM_172917 | RIKEN cDNA E330039K12 gene                                                | 1.045 |       | 0.95184 | 24882 A | -1.123 | 8.32  | 0.11077 | 3285  |
| Eif1ay        | A_51_P237514 | NM_025437 | eukaryotic translation initiation factor 1A                               | 1.045 | 83.95 | 0.94576 | 35047 P | 1.038  | 30.75 | 0.52163 | 8764  |
| Foxk1         | A_52_P471583 | NM_199068 | forkhead box K1                                                           | 1.045 | 82.34 | 0.92023 | 33050 P | 1.119  | 9.71  | 0.11657 | 3411  |
| Hes7          | A_52_P488908 | NM_033041 | hairy and enhancer of split 7 (Drosophila)                                | 1.045 | 83.36 | 0.92544 | 33487 M | 1.1    | 11.33 | 0.17399 | 4452  |
| Klhl9         | A_52_P567839 | NM_172871 | kelch-like 9 (Drosophila)                                                 | 1.045 | 83.36 | 0.93319 | 34079 P | 1.048  | 36.07 | 0.74866 | 10779 |
| Mdh2          | A_51_P384879 | NM_008617 | malate dehydrogenase 2, NAD (mitochondrial)                               | 1.045 | 82.34 | 0.92243 | 28527 P | 1.148  | 4.63  | 0.03941 | 1497  |
| Pfas          | A_52_P599624 | AK133932  | phosphoribosylformylglycinamide synthetase                                | 1.045 | 83.36 | 0.92427 | 33389 P | 1.033  | 36.07 | 0.71002 | 10399 |
| Prkcdbp       | A_51_P180974 | NM_028444 | protein kinase C, delta binding protein                                   | 1.045 | 83.95 | 0.94484 | 34993 P | -1.042 | 44.4  | 0.53168 | 8859  |
| Ptk2          | A_52_P359381 | NM_007982 | PTK2 protein tyrosine kinase 2                                            | 1.045 | 82.34 | 0.92158 | 33162 P | 1.098  | 9.71  | 0.097   | 3035  |
| Rap1b         | A_51_P476579 | XM_985042 | RAS related protein 1b                                                    | 1.045 | 83.95 | 0.95791 | 25219 M | 1.274  | 2.53  | 0.03761 | 1434  |
| Rpl32         | A_52_P573161 | NM_172086 | ribosomal protein L32                                                     | 1.045 | 84.22 | 0.96279 | 25450 M | -1.072 | 40.63 | 0.45852 | 8082  |
| Sh3bp5        | A_52_P305307 | NM_011894 | SH3-domain binding protein 5 (BTK-associated)                             | 1.045 | 84.22 | 0.96426 | 36823 P | 1.006  | 42.43 | 0.96012 | 12657 |
| Slc27a6       | A_51_P211616 | AK028699  | solute carrier family 27 (fatty acid transporters)                        | 1.045 |       | 0.98354 | 14988 A | 1.084  | 16.2  | 0.26246 | 5846  |
| Wbscr22       | A_51_P456590 | NM_025375 | Williams Beuren syndrome chromosome 11                                    | 1.045 | 83.36 | 0.92998 | 33775 P | 1.028  | 36.07 | 0.62852 | 9702  |
| Zfp532        | A_52_P342131 | NM_207255 | zinc finger protein 532                                                   | 1.045 | 83.36 | 0.92327 | 33314 P | 1.166  | 8.32  | 0.17262 | 4421  |
| Cdk7          | A_51_P193563 | NM_009874 | cyclin-dependent kinase 7 (homolog of Xenopus)                            | 1.044 | 83.95 | 0.94904 | 35326 P | 1.087  | 11.33 | 0.12    | 3494  |
| Dnajb12       | A_52_P92302  | AK089427  | Dnaj (Hsp40) homolog, subfamily B, member 12                              | 1.044 | 83.95 | 0.95466 | 35850 P | -1.304 | 0.51  | 0.00627 | 167   |
| Drg2          | A_51_P118742 | NM_021354 | developmentally regulated GTP binding protein                             | 1.044 | 81.02 | 0.9087  | 31744 P | -1.02  | 49.47 | 0.76438 | 10888 |
| Eml2          | A_51_P428013 | AK005562  | echinoderm microtubule associated protein 2                               | 1.044 | 81.02 | 0.95624 | 27971 M | -1.148 | 3.82  | 0.05775 | 2080  |
| Rap1gds1      | A_52_P199169 | AK052125  | RAP1, GTP-GDP dissociation stimulator 1                                   | 1.044 |       | 0.97483 | 19286 A | -1.039 | 46.3  | 0.65369 | 9907  |
| Smarcd2       | A_51_P184197 | NM_031878 | SWI/SNF related, matrix associated, actin dependent nuclear corepressor 2 | 1.044 | 83.36 | 0.95193 | 24962 M | 1.013  | 42.43 | 0.83652 | 11501 |
| Timeless      | A_52_P379531 | NM_011589 | timeless homolog (Drosophila)                                             | 1.044 | 82.34 | 0.96239 | 33171 M | 1.011  | 42.43 | 0.81133 | 11289 |
| Tln1          | A_51_P446865 | NM_011602 | talin 1                                                                   | 1.044 | 84.22 | 0.96504 | 36984 P | 1.028  | 33.49 | 0.53218 | 8866  |
| Ube3c         | A_52_P314201 | NM_133907 | ubiquitin protein ligase E3C                                              | 1.044 | 83.36 | 0.93135 | 33943 P | 1.075  | 19.02 | 0.32714 | 6643  |
| O610012G03Rik | A_51_P417279 | AK002600  | RIKEN cDNA O610012G03 gene                                                | 1.043 | 84.22 | 0.95609 | 35960 P | 1.053  | 22.1  | 0.28112 | 6103  |
| 2600009E05Rik | A_52_P84447  | NM_029832 | RIKEN cDNA 2600009E05 gene                                                | 1.043 | 83.95 | 0.95123 | 35586 P | -1.223 | 2.53  | 0.08211 | 2706  |
| 9330129D05Rik | A_51_P384113 | AK033963  | RIKEN cDNA 9330129D05 gene                                                | 1.043 | 84.4  | 0.96778 | 37272 P | -1.264 | 0.51  | 0.00731 | 250   |
| Cdo1          | A_51_P489452 | NM_033037 | cysteine dioxygenase 1, cytosolic                                         | 1.043 | 83.95 | 0.95055 | 35482 P | 1.153  | 6.98  | 0.08984 | 2893  |
| Centg3        | A_51_P410112 | NM_139153 | centaurin, gamma 3                                                        | 1.043 | 83.36 | 0.93862 | 34456 P | 1.061  | 22.1  | 0.32914 | 6657  |
| D2Ert435e     | A_52_P550491 | NM_153387 | DNA segment, Chr 2, ERATO Doi 435, expressed                              | 1.043 | 83.36 | 0.93702 | 34348 P | 1.14   | 6.98  | 0.08095 | 2684  |
| Dnajb1        | A_52_P171663 | NM_018808 | Dnaj (Hsp40) homolog, subfamily B, member 1                               | 1.043 | 84.56 | 0.98182 | 38974 P | 1.088  | 13.58 | 0.22647 | 5298  |
| Efnb1         | A_51_P388478 | NM_010110 | ephrin B1                                                                 | 1.043 | 82.34 | 0.91818 | 32854 P | 1.062  | 28.13 | 0.52549 | 8804  |
| Hibadh        | A_51_P165165 | NM_145567 | 3-hydroxyisobutyrate dehydrogenase                                        | 1.043 | 82.34 | 0.92017 | 33042 P | -1.193 | 1.18  | 0.0225  | 953   |
| Mpv17         | A_51_P150802 | NM_008622 | Mpv17 transgene, kidney disease mutant                                    | 1.043 | 83.36 | 0.93294 | 34022 P | 1.129  | 5.75  | 0.04588 | 1722  |
| Pitpnm2       | A_52_P548399 | NM_011256 | phosphatidylinositol transfer protein, membrane associated                | 1.043 |       | 0.97483 | 19295 A | 1.084  | 13.58 | 0.14193 | 3886  |
| Plod3         | A_51_P372172 | NM_011962 | procollagen-lysine, 2-oxoglutarate 5-dioxygenase                          | 1.043 | 83.36 | 0.92462 | 33424 P | -1.045 | 43.75 | 0.48278 | 8354  |
| Ppt1          | A_52_P473866 | AK153316  | palmitoyl-protein thioesterase 1                                          | 1.043 | 83.95 | 0.9416  | 34685 P | -1.012 | 49.48 | 0.77958 | 10985 |
| Pum2          | A_52_P138598 | AK141682  | pumilio 2 (Drosophila)                                                    | 1.043 | 83.36 | 0.92998 | 33778 P | 1.112  | 6.98  | 0.05389 | 1974  |
| Tef           | A_52_P485573 | NM_153484 | thyrotroph embryonic factor                                               | 1.043 | 84.22 | 0.96099 | 36478 P | -1.085 | 44.4  | 0.70134 | 10334 |
| U2af114       | A_51_P509140 | NM_170760 | U2 small nuclear RNA auxiliary factor 1-like                              | 1.043 | 84.22 | 0.96489 | 36908 P | 1.01   | 42.43 | 0.84595 | 11571 |
| Yes1          | A_52_P309068 | AK031316  | Yamaguchi sarcoma viral (v-yes) oncogene                                  | 1.043 | 84.56 | 0.94301 | 32323 M | 1.094  | 13.58 | 0.24023 | 5490  |
| Zfp101        | A_51_P184796 | NM_009542 | zinc finger protein 101                                                   | 1.043 | 84.22 | 0.96279 | 36705 P | -1.072 | 28.13 | 0.19532 | 4826  |
| 2700029M09Rik | A_51_P450518 | BC042740  | RIKEN cDNA 2700029M09 gene                                                | 1.042 | 83.36 | 0.92998 | 33800 P | 1.042  | 33.49 | 0.67189 | 10068 |
| Actr10        | A_51_P341324 | NM_019785 | ARP10 actin-related protein 10 homolog (Drosophila)                       | 1.042 | 82.34 | 0.9493  | 24822 M | -1.299 | 1.18  | 0.06339 | 2246  |
| Actr1a        | A_51_P509760 | NM_016860 | ARP1 actin-related protein 1 homolog A (Drosophila)                       | 1.042 | 83.36 | 0.93702 | 34346 P | 1.141  | 8.32  | 0.1097  | 3260  |
| Atp5k         | A_51_P301289 | NM_007507 | ATP synthase, H+ transporting, mitochondrial                              | 1.042 | 84.22 | 0.95676 | 36072 P | -1.045 | 45.68 | 0.64396 | 9830  |
| BC038286      | A_51_P174415 | NM_170755 | cDNA sequence BC038286                                                    | 1.042 | 84.22 | 0.95883 | 30671 P | 1.02   | 42.43 | 0.84229 | 11538 |
| Clcn7         | A_52_P105015 | NM_011930 | chloride channel 7                                                        | 1.042 | 84.22 | 0.95568 | 35903 P | -1.447 | 0     | 0.00584 | 23    |



|               |              |              |                                               |       |       |         |         |        |       |         |       |
|---------------|--------------|--------------|-----------------------------------------------|-------|-------|---------|---------|--------|-------|---------|-------|
| Dkk1          | A_52_P508391 | NM_010051    | dickkopf homolog 1 ( <i>Xenopus laevis</i> )  | 1.042 | 83.36 | 0.97791 | 28943 M | -1.022 | 48.39 | 0.66667 | 10014 |
| Eif3s10       | A_52_P524895 | NM_010123    | eukaryotic translation initiation factor 3, s | 1.042 | 82.34 | 0.91805 | 32832 P | 1.059  | 22.1  | 0.296   | 6283  |
| Omg           | A_51_P255832 | NM_019409    | oligodendrocyte myelin glycoprotein           | 1.042 | 84.4  | 0.97482 | 37922 P | -1.026 | 47.92 | 0.6878  | 10218 |
| Rhobtb3       | A_52_P413280 | NM_028493    | Rho-related BTB domain containing 3           | 1.042 | 83.36 | 0.93023 | 33846 P | 1.074  | 11.33 | 0.12441 | 3587  |
| Rpl36al       | A_51_P209444 | NM_025589    | ribosomal protein L36a-like                   | 1.042 | 84.22 | 0.96504 | 25556 M | -1.156 | 5.75  | 0.11265 | 3329  |
| Tlx1          | A_52_P58359  | NM_021901    | T-cell leukemia, homeobox 1                   | 1.042 | 83.36 | 0.9283  | 33679 P | -1.168 | 3.46  | 0.06913 | 2378  |
| 2410014A08Rik | A_52_P223571 | NM_175403    | RIKEN cDNA 2410014A08 gene                    | 1.041 | 82.34 | 0.92327 | 33324 P | 1.079  | 16.2  | 0.19954 | 4893  |
| 4933428G09Rik | A_51_P459340 | NM_025755    | RIKEN cDNA 4933428G09 gene                    | 1.041 | 83.36 | 0.93702 | 34347 P | 1.012  | 42.43 | 0.88231 | 11883 |
| Lancl1        | A_51_P142175 | NM_021295    | LanC (bacterial lantibiotic synthetase com    | 1.041 | 83.36 | 0.9348  | 34169 P | 1.008  | 42.43 | 0.88007 | 11860 |
| Pdcd10        | A_51_P496814 | NM_019745    | programmed cell death 10                      | 1.041 | 83.95 | 0.94904 | 35323 P | -1.044 | 43.75 | 0.47086 | 8214  |
| Pfdn1         | A_52_P456059 | NM_026027    | prefoldin 1                                   | 1.041 | 84.22 | 0.95871 | 36293 P | 1.041  | 30.75 | 0.56143 | 9125  |
| Thpo          | A_51_P385086 | NM_009379    | thrombopoietin                                | 1.041 | 83.95 | 0.94386 | 34908 P | -1.316 | 0.51  | 0.01458 | 616   |
| 0610031J06Rik | A_51_P437717 | NM_020003    | RIKEN cDNA 0610031J06 gene                    | 1.04  | 83.36 | 0.9348  | 34171 P | 1.037  | 30.75 | 0.45372 | 8035  |
| Arid5a        | A_52_P350512 | NM_145996    | AT rich interactive domain 5A (Mrf1 like)     | 1.04  | 84.52 | 0.97618 | 38103 M | 1.105  | 11.33 | 0.16577 | 4307  |
| Arl2          | A_52_P122696 | NM_019722    | ADP-ribosylation factor-like 2                | 1.04  | 84.4  | 0.96634 | 37134 P | 1.051  | 33.49 | 0.6808  | 10140 |
| Cables2       | A_51_P141610 | BC052789     | Cdk5 and Abl enzyme substrate 2               | 1.04  | 83.95 | 0.9526  | 35774 P | 1.094  | 16.2  | 0.25544 | 5734  |
| Crk           | A_52_P618807 | NM_133656    | v-crk sarcoma virus CT10 oncogene homoc       | 1.04  | 82.34 | 0.9256  | 33517 P | -1.029 | 47.43 | 0.64519 | 9845  |
| Dgcr2         | A_52_P392178 | AK042786     | DiGeorge syndrome critical region gene 2      | 1.04  | 84.4  | 0.96705 | 37210 P | 1.058  | 22.1  | 0.35507 | 6959  |
| Dnajc7        | A_51_P449956 | NM_019795    | Dnaj (Hsp40) homolog, subfamily C, mem        | 1.04  | 83.36 | 0.93855 | 34439 P | 1.069  | 16.2  | 0.21497 | 5120  |
| Fkbp9         | A_52_P37681  | NM_012056    | FK506 binding protein 9                       | 1.04  | 82.34 | 0.92546 | 33492 P | 1.223  | 2.53  | 0.0267  | 1090  |
| Nfyb          | A_52_P239707 | NM_010914    | nuclear transcription factor-Y beta           | 1.04  | 82.34 | 0.92175 | 33175 P | 1.031  | 36.07 | 0.68088 | 10142 |
| Notch4        | A_51_P195875 | NM_010929    | Notch gene homolog 4 ( <i>Drosophila</i> )    | 1.04  | 84.4  | 0.97112 | 37529 P | 1.099  | 11.33 | 0.13968 | 3841  |
| Nup50         | A_51_P411297 | NM_016714    | nucleoporin 50                                | 1.04  | 84.22 | 0.96101 | 36483 P | -1.028 | 47.43 | 0.65822 | 9956  |
| Rab14         | A_51_P269434 | NM_026697    | RAB14, member RAS oncogene family             | 1.04  | 83.95 | 0.94425 | 34949 P | 1.132  | 8.32  | 0.0904  | 2904  |
| Rps27l        | A_51_P246903 | NM_026467    | ribosomal protein S27-like                    | 1.04  | 82.34 | 0.94484 | 32492 P | -1.203 | 1.32  | 0.02905 | 1169  |
| Slc4a2        | A_51_P172542 | NM_009207    | solute carrier family 4 (anion exchanger),    | 1.04  | 83.95 | 0.94613 | 35077 P | 1.115  | 6.98  | 0.05307 | 1959  |
| Vps4a         | A_51_P383629 | NM_126165    | vacuolar protein sorting 4a (yeast)           | 1.04  | 82.34 | 0.92551 | 33506 P | -1.035 | 44.4  | 0.45312 | 8026  |
| 2210018M11Rik | A_52_P197261 | XM_897432    |                                               | 1.039 | 84.4  | 0.97371 | 37854 P | -1.03  | 45.05 | 0.49171 | 8461  |
| 2610205E22Rik | A_51_P176517 | NM_170592    | RIKEN cDNA 2610205E22 gene                    | 1.039 | 84.22 | 0.96276 | 36701 P | -1.166 | 3.82  | 0.0737  | 2502  |
| Atic          | A_51_P222436 | NM_026195    | 5-aminoimidazole-4-carboxamide ribonuc        | 1.039 | 83.36 | 0.93689 | 34328 P | 1.096  | 8.32  | 0.06925 | 2382  |
| Bad           | A_51_P419364 | NM_007522    | Bcl-associated death promoter                 | 1.039 | 84.22 | 0.96039 | 36433 P | -1.275 | 0.56  | 0.0141  | 592   |
| C230096C10Rik | A_52_P662216 | NM_146157    | RIKEN cDNA C230096C10 gene                    | 1.039 | 83.95 | 0.96271 | 25443 M | 1.088  | 11.33 | 0.1399  | 3850  |
| D8ErtD738e    | A_51_P391668 | NM_001007571 | DNA segment, Chr 8, ERATO Doi 738, exp        | 1.039 | 84.22 | 0.96096 | 36469 P | -1.044 | 45.05 | 0.58463 | 9296  |
| Elovf5        | A_52_P676944 | NM_134255    | ELOVL family member 5, elongation of lo       | 1.039 | 84.4  | 0.97538 | 25957 M | 1.09   | 9.71  | 0.09627 | 3016  |
| Foxd1         | A_51_P237783 | NM_008242    | forkhead box D1                               | 1.039 | 84.56 | 0.96558 | 33966 M | 1.068  | 13.58 | 0.15235 | 4075  |
| Hnrpd         | A_52_P466887 | NM_001077265 | heterogeneous nuclear ribonucleoprotein       | 1.039 | 83.95 | 0.94519 | 35038 P | 1.094  | 13.58 | 0.19654 | 4844  |
| Ndufc2        | A_51_P357459 | NM_024220    | NADH dehydrogenase (ubiquinone) 1, sub        | 1.039 | 82.34 | 0.9547  | 25050 M | 1.135  | 13.58 | 0.33933 | 6770  |
| Pqlc2         | A_51_P306892 | NM_145384    | PQ loop repeat containing 2                   | 1.039 | 82.34 | 0.92082 | 33124 P | -1.169 | 3.46  | 0.06956 | 2386  |
| Prdm15        | A_52_P262118 | AK144820     | PR domain containing 15                       | 1.039 | 84.22 | 0.9312  | 31416 P | -1.107 | 22.1  | 0.2573  | 5769  |
| Psmd2         | A_52_P163978 | NM_134101    | proteasome (prosome, macropain) 26S su        | 1.039 | 83.95 | 0.94329 | 34863 P | 1.104  | 8.32  | 0.07039 | 2408  |
| Smndc1        | A_51_P225179 | NM_172429    | survival motor neuron domain containing       | 1.039 | 84.22 | 0.96853 | 25702 M | 1.093  | 19.02 | 0.37685 | 7240  |
| Sympk         | A_51_P183275 | AK146894     | symplesin                                     | 1.039 | 84.4  | 0.96776 | 37250 P | 1.041  | 28.13 | 0.38751 | 7368  |
| Zfp259        | A_52_P282068 | NM_011752    | zinc finger protein 259                       | 1.039 | 83.95 | 0.95054 | 35481 P | 1.002  | 42.43 | 0.97618 | 12809 |
| Dhdds         | A_52_P27271  | NM_026144    | dehydrodolichyl diphosphate synthase          | 1.038 | 84.22 | 0.9639  | 36802 P | 1.004  | 42.43 | 0.93005 | 12388 |
| Dnajb6        | A_51_P117439 | NM_011847    | Dnaj (Hsp40) homolog, subfamily B, mem        | 1.038 | 83.95 | 0.94823 | 35287 P | 1.099  | 11.33 | 0.1508  | 4051  |
| Drg1          | A_51_P453948 | NM_007879    | developmentally regulated GTP binding p       | 1.038 | 83.95 | 0.95123 | 35589 P | 1.202  | 3.46  | 0.0403  | 1538  |
| Fgf2          | A_51_P399845 | NM_008006    | fibroblast growth factor 2                    | 1.038 | 84.56 | 0.95733 | 33333 M | 1.127  | 4.63  | 0.03714 | 1413  |
| Itn2c         | A_51_P267370 | NM_022417    | integral membrane protein 2C                  | 1.038 | 83.95 | 0.94234 | 34755 P | -1.073 | 25.31 | 0.1612  | 4239  |
| Pde4a         | A_52_P600760 | BC044786     | phosphodiesterase 4A, cAMP specific           | 1.038 | 84.22 | 0.98706 | 15063 A | -1.017 | 49.48 | 0.77661 | 10964 |
| Ppp2r5e       | A_51_P369478 | AK014554     | protein phosphatase 2, regulatory subuni      | 1.038 | 83.36 | 0.9362  | 34277 P | 1.067  | 22.1  | 0.35296 | 6922  |
| Rpl28         | A_51_P339103 | NM_009081    | ribosomal protein L28                         | 1.038 | 84.22 | 0.9689  | 25711 M | 1.025  | 38.4  | 0.7194  | 10490 |
| Sfrs8         | A_51_P199624 | NM_172276    | splicing factor, arginine/serine-rich 8       | 1.038 | 83.95 | 0.94326 | 34859 P | -1.058 | 38.4  | 0.35084 | 6886  |
| Tigd2         | A_51_P393078 | XM_144820    | tigger transposable element derived 2         | 1.038 | 83.95 | 0.94294 | 34814 P | -1.019 | 49.47 | 0.75231 | 10806 |

|               |              |              |                                               |       |       |         |         |        |       |         |       |
|---------------|--------------|--------------|-----------------------------------------------|-------|-------|---------|---------|--------|-------|---------|-------|
| Traf6         | A_52_P529306 | AK051130     | Tnf receptor-associated factor 6              | 1.038 |       | 0.96863 | 25667 A | 1.052  | 25.31 | 0.35244 | 6909  |
| Uvrag         | A_52_P153265 | AK020590     | UV radiation resistance associated gene       | 1.038 | 84.4  | 0.97217 | 37700 P | -1.075 | 33.49 | 0.33283 | 6713  |
| Wdr35         | A_51_P324442 | NM_172470    | WD repeat domain 35                           | 1.038 | 82.34 | 0.92852 | 33684 P | 1.06   | 25.31 | 0.40275 | 7543  |
| 5730407K14Rik | A_51_P323521 | NM_133924    | sorting nexin family member 21                | 1.037 | 84.22 | 0.95733 | 36121 P | -1.007 | 49.48 | 0.90263 | 12117 |
| A530089I17Rik | A_51_P405985 | NM_133999    | RIKEN cDNA A530089I17 gene                    | 1.037 | 84.22 | 0.95446 | 35844 P | -1.01  | 49.48 | 0.87739 | 11836 |
| Brcal         | A_52_P18267  | NM_009764    | breast cancer 1                               | 1.037 | 82.34 | 0.967   | 28458 M | 1.008  | 42.43 | 0.88251 | 11887 |
| Cd34          | A_51_P204740 | NM_133654    | CD34 antigen                                  | 1.037 | 84.52 | 0.97425 | 37884 P | -1.079 | 36.07 | 0.41288 | 7652  |
| Dnaja4        | A_51_P308549 | NM_021422    | Dnaj (Hsp40) homolog, subfamily A, mem        | 1.037 | 84.22 | 0.96303 | 36758 P | -1.007 | 49.48 | 0.90387 | 12130 |
| Eif2ak1       | A_52_P681727 | AK020887     | eukaryotic translation initiation factor 2 a  | 1.037 | 72.2  | 0.9617  | 28193 M | -1.033 | 46.85 | 0.65458 | 9915  |
| Eif3s6ip      | A_51_P173086 | NM_145139    | eukaryotic translation initiation factor 3, s | 1.037 | 83.95 | 0.9493  | 35360 P | -1.384 | 0.51  | 0.00627 | 145   |
| Letmd1        | A_51_P486512 | NM_134093    | LETM1 domain containing 1                     | 1.037 | 84.22 | 0.96487 | 25521 M | 1.026  | 40.63 | 0.83898 | 11514 |
| Psap          | A_52_P508089 | NM_011179    | prosaposin                                    | 1.037 | 84.22 | 0.96769 | 25666 M | 1.045  | 28.13 | 0.4115  | 7621  |
| Rufy2         | A_52_P174456 | NM_027425    | RUN and FYVE domain-containing 2              | 1.037 | 84.22 | 0.95444 | 35842 P | -1.073 | 36.07 | 0.37699 | 7242  |
| Sf3a1         | A_52_P569178 | AK030115     | splicing factor 3a, subunit 1                 | 1.037 | 84.22 | 0.96362 | 36785 P | 1.066  | 16.2  | 0.19537 | 4827  |
| Sufu          | A_52_P340811 | BC048168     | suppressor of fused homolog (Drosophila       | 1.037 | 84.4  | 0.97114 | 37536 P | -1.015 | 49.48 | 0.80996 | 11278 |
| Wnt5a         | A_51_P162272 | NM_009524    | wingless-related MMTV integration site 5      | 1.037 |       | 0.95176 | 27804 A | 1.044  | 25.31 | 0.33454 | 6732  |
| Wnt5b         | A_51_P137991 | NM_009525    | wingless-related MMTV integration site 5      | 1.037 | 82.34 | 0.92751 | 33639 P | -1.049 | 43.15 | 0.45669 | 8064  |
| 2510049I19Rik | A_52_P482124 | NM_026455    | RIKEN cDNA 2510049I19 gene                    | 1.036 | 83.36 | 0.95996 | 33525 P | 1.073  | 22.1  | 0.43177 | 7855  |
| Acp6          | A_51_P444335 | NM_019800    | acid phosphatase 6, lysophosphatidic          | 1.036 | 83.95 | 0.95045 | 35465 P | 1.153  | 5.75  | 0.05291 | 1951  |
| Adcyap1       | A_52_P425667 | NM_009625    | adenylate cyclase activating polypeptide      | 1.036 | 84.56 | 0.98771 | 39569 P | 1.131  | 22.1  | 0.56295 | 9133  |
| AU019823      | A_52_P106391 | NM_212449    | expressed sequence AU019823                   | 1.036 | 83.95 | 0.94706 | 35162 P | 1.171  | 9.71  | 0.20959 | 5038  |
| BC031181      | A_51_P107090 | NM_001001181 | cDNA sequence BC031181                        | 1.036 | 79.26 | 0.95799 | 30609 P | 1.202  | 3.46  | 0.04342 | 1627  |
| Bin1          | A_52_P384956 | NM_009668    | bridging integrator 1                         | 1.036 | 84.22 | 0.95676 | 36054 P | 1.048  | 22.1  | 0.28618 | 6173  |
| Casp6         | A_51_P215922 | NM_009811    | caspase 6                                     | 1.036 | 84.4  | 0.96492 | 36918 P | -1.045 | 46.3  | 0.69989 | 10316 |
| Eif4g2        | A_51_P347907 | NM_013507    | eukaryotic translation initiation factor 4, g | 1.036 | 82.34 | 0.93314 | 34049 P | 1.116  | 8.32  | 0.09166 | 2934  |
| Glxr2         | A_51_P483928 | NM_001038592 | glutaredoxin 2 (thioltransferase)             | 1.036 | 84.22 | 0.95823 | 36210 P | -1.261 | 0.51  | 0.0108  | 421   |
| Habp4         | A_52_P421249 | NM_019986    | hyaluronic acid binding protein 4             | 1.036 | 84.4  | 0.96421 | 36819 P | 1.058  | 22.1  | 0.35274 | 6918  |
| Incenp        | A_51_P264064 | NM_016692    | inner centromere protein                      | 1.036 | 84.56 | 0.97889 | 38405 P | 1.094  | 9.71  | 0.08211 | 2707  |
| Pou2f3        | A_51_P337156 | NM_011139    | POU domain, class 2, transcription factor     | 1.036 | 84.56 | 0.98109 | 31942 M | -1.08  | 28.13 | 0.25067 | 5653  |
| Prkch         | A_51_P355852 | NM_008856    | protein kinase C, eta                         | 1.036 | 84.4  | 0.96778 | 37265 P | -1.127 | 11.33 | 0.17257 | 4416  |
| Rbbp7         | A_51_P114385 | NM_009031    | retinoblastoma binding protein 7              | 1.036 | 84.22 | 0.95755 | 36148 P | 1.184  | 3.01  | 0.02177 | 913   |
| Slc35c2       | A_51_P158425 | NM_144893    | solute carrier family 35, member C2           | 1.036 | 83.95 | 0.95094 | 35550 P | -1.023 | 47.92 | 0.65987 | 9971  |
| Snrpg         | A_51_P200134 | NM_026506    | small nuclear ribonucleoprotein polypept      | 1.036 | 84.22 | 0.96696 | 25637 M | 1.015  | 42.43 | 0.79013 | 11092 |
| Tmod3         | A_52_P188782 | AK082971     | tropomodulin 3                                | 1.036 | 84.22 | 0.9584  | 36250 P | -1.148 | 8.32  | 0.14137 | 3870  |
| 1110001A07Rik | A_51_P237512 | NM_025377    | RIKEN cDNA 1110001A07 gene                    | 1.035 | 84.22 | 0.95768 | 36155 P | 1.091  | 13.58 | 0.17475 | 4466  |
| 2310035C23Rik | A_51_P231768 | NM_173187    | RIKEN cDNA 2310035C23 gene                    | 1.035 | 83.95 | 0.95254 | 35765 P | 1.099  | 11.33 | 0.16821 | 4347  |
| Armcx3        | A_52_P423380 | NM_027870    | armadillo repeat containing, X-linked 3       | 1.035 | 83.36 | 0.93859 | 34445 P | -1.157 | 8.32  | 0.15225 | 4070  |
| Bex2          | A_51_P237668 | NM_009749    | brain expressed X-linked 2                    | 1.035 | 83.95 | 0.96219 | 25430 M | -1.022 | 49.39 | 0.78303 | 11032 |
| Bmpr1a        | A_52_P17146  | NM_009758    | bone morphogenetic protein receptor, ty       | 1.035 | 84.22 | 0.95609 | 36004 P | 1.074  | 25.31 | 0.49251 | 8474  |
| C1qbp         | A_51_P466162 | NM_007573    | complement component 1, q subcompon           | 1.035 | 83.95 | 0.9493  | 35356 P | 1.094  | 11.33 | 0.11364 | 3350  |
| Cfl1          | A_52_P477720 | NM_007687    | cofilin 1, non-muscle                         | 1.035 | 84.52 | 0.97615 | 38089 P | 1.18   | 3.82  | 0.04181 | 1580  |
| Exosc6        | A_52_P195922 | NM_028274    | exosome component 6                           | 1.035 | 84.4  | 0.97154 | 37575 P | 1.022  | 40.63 | 0.80819 | 11264 |
| Fxyd1         | A_51_P287001 | NM_019503    | FXVD domain-containing ion transport reg      | 1.035 | 84.4  | 0.97007 | 37404 P | -1.14  | 3.82  | 0.05066 | 1873  |
| Gpbar1        | A_51_P175311 | NM_174985    | G protein-coupled bile acid receptor 1        | 1.035 | 83.36 | 0.94271 | 34771 P | -1.179 | 4.63  | 0.11254 | 3326  |
| Hnrpa0        | A_52_P625431 | AK019388     | heterogeneous nuclear ribonucleoprotein       | 1.035 | 84.56 | 0.95275 | 30318 M | 1.099  | 9.71  | 0.11104 | 3294  |
| Irak3         | A_52_P644273 | NM_028679    | interleukin-1 receptor-associated kinase 3    | 1.035 | 84.22 | 0.95637 | 36046 P | -1.074 | 30.75 | 0.28281 | 6117  |
| Katnal1       | A_52_P365528 | NM_153572    | katanin p60 subunit A-like 1                  | 1.035 | 83.95 | 0.94651 | 35115 P | -1.042 | 43.15 | 0.39354 | 7443  |
| Ldlr          | A_52_P427024 | NM_010700    | low density lipoprotein receptor              | 1.035 | 84.22 | 0.96837 | 25700 M | 1.025  | 42.43 | 0.87887 | 11849 |
| Pip5k3        | A_52_P166653 | NM_011086    | phosphatidylinositol-3-phosphate/phosph       | 1.035 | 77.44 | 0.95861 | 30648 P | 1.048  | 28.13 | 0.49834 | 8565  |
| Rhov          | A_51_P439584 | NM_145530    | ras homolog gene family, member V             | 1.035 | 83.95 | 0.95046 | 35476 P | 1.075  | 16.2  | 0.2199  | 5210  |
| Tmem9         | A_51_P359237 | NM_025439    | transmembrane protein 9                       | 1.035 | 84.4  | 0.9648  | 36854 P | -1.066 | 28.13 | 0.19463 | 4813  |
| Arid4b        | A_51_P341821 | AK080967     | AT rich interactive domain 4B (Rbp1 like)     | 1.034 | 84.4  | 0.96096 | 28125 M | 1.273  | 1.62  | 0.02358 | 989   |
| Atp6ap1       | A_51_P447988 | NM_018794    | ATPase, H+ transporting, lysosomal acces      | 1.034 | 83.95 | 0.95332 | 35798 P | 1.153  | 5.75  | 0.06513 | 2289  |

|               |              |              |                                                                      |       |       |         |         |        |       |         |       |
|---------------|--------------|--------------|----------------------------------------------------------------------|-------|-------|---------|---------|--------|-------|---------|-------|
| Cacng4        | A_51_P494875 | AJ272045     | calcium channel, voltage-dependent, gamma                            | 1.034 | 83.36 | 0.93874 | 34486 P | 1.111  | 8.32  | 0.07623 | 2560  |
| Dusp6         | A_51_P502614 | NM_026268    | dual specificity phosphatase 6                                       | 1.034 | 83.95 | 0.96421 | 25493 M | 1.202  | 3.82  | 0.06285 | 2230  |
| Flot2         | A_51_P228232 | NM_008028    | flotillin 2                                                          | 1.034 | 84.22 | 0.95569 | 35927 P | 1.16   | 11.33 | 0.3151  | 6524  |
| H2afy         | A_52_P179238 | BC006955     | H2A histone family, member Y                                         | 1.034 | 84.22 | 0.96163 | 36573 P | 1.056  | 25.31 | 0.3658  | 7109  |
| Kif3b         | A_51_P279050 | NM_008444    | kinesin family member 3B                                             | 1.034 | 84.22 | 0.95916 | 36311 P | -1.106 | 6.98  | 0.06516 | 2292  |
| Mpo           | A_51_P317460 | NM_010824    | myeloperoxidase                                                      | 1.034 | 83.95 | 0.9452  | 35041 P | 1.016  | 40.63 | 0.77949 | 10984 |
| Nol5a         | A_51_P187902 | NM_024193    | nucleolar protein 5A                                                 | 1.034 | 84.4  | 0.9703  | 37432 P | -1.352 | 0.51  | 0.00584 | 56    |
| Polg          | A_51_P468294 | NM_017462    | polymerase (DNA directed), gamma                                     | 1.034 | 83.95 | 0.94728 | 35176 P | 1.09   | 9.71  | 0.08772 | 2834  |
| Prdx1         | A_51_P353183 | NM_011034    | peroxiredoxin 1                                                      | 1.034 | 84.52 | 0.97808 | 38311 P | 1.04   | 33.49 | 0.63197 | 9738  |
| Stoml2        | A_51_P380685 | NM_023231    | stomatin (Epb7.2)-like 2                                             | 1.034 | 84.56 | 0.98036 | 38530 P | 1.086  | 9.71  | 0.09094 | 2920  |
| Tcn2          | A_51_P128491 | NM_015749    | transcobalamin 2                                                     | 1.034 | 84.22 | 0.95609 | 35958 P | 1.051  | 28.13 | 0.54667 | 8996  |
| Tox           | A_52_P258211 | AK051947     | thymocyte selection-associated HMG box                               | 1.034 | 83.95 | 0.97161 | 25713 M | -1.409 | 0.51  | 0.00584 | 98    |
| 2700078K21Rik | A_51_P156800 | NM_028308    | RIKEN cDNA 2700078K21 gene                                           | 1.033 | 84.4  | 0.97194 | 37610 P | 1.008  | 42.43 | 0.86042 | 11683 |
| 6530406A20Rik | A_51_P249516 | AK087211     | RIKEN cDNA 6530406A20 gene                                           | 1.033 | 84.4  | 0.97209 | 37679 P | 1.01   | 42.43 | 0.83055 | 11462 |
| Aldh4a1       | A_52_P123230 | NM_175438    | aldehyde dehydrogenase 4 family, member                              | 1.033 | 83.36 | 0.94301 | 34842 P | 1.081  | 19.02 | 0.35274 | 6912  |
| Cdkn2d        | A_51_P122356 | NM_009878    | cyclin-dependent kinase inhibitor 2D (p15)                           | 1.033 | 84.52 | 0.97634 | 38130 P | -1.01  | 49.48 | 0.8444  | 11559 |
| Lass5         | A_51_P481546 | NM_028015    | longevity assurance homolog 5 (S. cerevisiae)                        | 1.033 | 84.22 | 0.9552  | 35872 P | 1.065  | 22.1  | 0.34708 | 6839  |
| Nasp          | A_51_P281255 | NM_016777    | nuclear autoantigenic sperm protein (histone)                        | 1.033 | 83.95 | 0.94662 | 35126 P | 1.042  | 28.13 | 0.36779 | 7134  |
| Nfib          | A_51_P304412 | NM_008687    | nuclear factor I/B                                                   | 1.033 | 84.22 | 0.96281 | 36735 P | 1.035  | 30.75 | 0.45852 | 8085  |
| Osbpl6        | A_52_P359958 | NM_145525    | oxysterol binding protein-like 6                                     | 1.033 | 83.36 | 0.93965 | 34537 P | -1.063 | 36.07 | 0.32152 | 6580  |
| Polr3c        | A_52_P309008 | AK016716     | polymerase (RNA) III (DNA directed) polypeptide                      | 1.033 | 84.22 | 0.95569 | 35909 P | 1.057  | 25.31 | 0.41996 | 7729  |
| Rab19         | A_51_P414126 | NM_011226    | RAB19, member RAS oncogene family                                    | 1.033 | 84.4  | 0.96703 | 37199 P | 1.008  | 42.43 | 0.89842 | 12051 |
| Rab24         | A_51_P320401 | NM_009000    | RAB24, member RAS oncogene family                                    | 1.033 | 84.4  | 0.97138 | 37565 P | -1.025 | 48.39 | 0.70839 | 10394 |
| Zfp287        | A_51_P489702 | NM_133208    | zinc finger protein 287                                              | 1.033 | 84.52 | 0.98815 | 15122 A | 1.008  | 42.43 | 0.9162  | 12225 |
| 1110005A03Rik | A_51_P114591 | NM_028865    | RIKEN cDNA 1110005A03 gene                                           | 1.032 | 83.95 | 0.9493  | 35355 P | 1.112  | 8.32  | 0.06274 | 2220  |
| 4933407K13Rik | A_52_P287507 | AK036260     | RIKEN cDNA 4933407K13 gene                                           | 1.032 | 83.95 | 0.94748 | 35220 P | -1.035 | 43.75 | 0.41427 | 7668  |
| Arih1         | A_52_P239616 | AK083466     | ARIH1                                                                | 1.032 | 84.56 | 0.9834  | 39143 P | 1.12   | 5.75  | 0.04247 | 1595  |
| Bmp10         | A_51_P293830 | NM_009756    | bone morphogenetic protein 10                                        | 1.032 | 82.34 | 0.96421 | 28297 M | -1.039 | 44.4  | 0.47093 | 8215  |
| C730034F03Rik | A_52_P28955  | NM_176900    | RIKEN cDNA C730034F03 gene                                           | 1.032 | 84.56 | 0.98413 | 39197 P | -1.151 | 4.63  | 0.08432 | 2759  |
| CommD5        | A_51_P430485 | NM_025536    | COMM domain containing 5                                             | 1.032 | 83.95 | 0.94976 | 35419 P | -1.142 | 2.53  | 0.03097 | 1220  |
| Golgb1        | A_51_P387952 | AK015226     | golgi autoantigen, golgin subfamily b, member                        | 1.032 | 84.52 | 0.97255 | 37740 M | -1.113 | 11.33 | 0.1174  | 3427  |
| Hes2          | A_51_P303308 | NM_008236    | hairly and enhancer of split 2 (Drosophila)                          | 1.032 | 83.36 | 0.94335 | 34866 P | 1.107  | 6.98  | 0.05876 | 2099  |
| Msn           | A_51_P115197 | NM_010833    | moesin                                                               | 1.032 | 84.4  | 0.96778 | 37262 P | 1.037  | 33.49 | 0.59894 | 9441  |
| Slc22a8       | A_51_P127527 | NM_031194    | solute carrier family 22 (organic anion transporter)                 | 1.032 | 84.56 | 0.95861 | 30661 M | -1.026 | 46.3  | 0.53846 | 8921  |
| Stat6         | A_51_P452382 | NM_009284    | signal transducer and activator of transcription 6                   | 1.032 | 84.4  | 0.97024 | 37423 P | 1.056  | 19.02 | 0.22821 | 5332  |
| Tbx2          | A_52_P318532 | NM_009324    | T-box 2                                                              | 1.032 | 84.22 | 0.96163 | 36572 P | 1.001  | 42.43 | 0.97964 | 12840 |
| Tlk2          | A_52_P451888 | NM_011903    | tousled-like kinase 2 (Arabidopsis)                                  | 1.032 | 83.36 | 0.94603 | 35060 P | 1.129  | 4.63  | 0.03654 | 1403  |
| Tmeff1        | A_51_P222381 | NM_021436    | transmembrane protein with EGF-like and fibronectin type III repeats | 1.032 | 84.56 | 0.98789 | 39585 P | 1.025  | 36.07 | 0.6265  | 9686  |
| Alg3          | A_51_P155501 | NM_145939    | asparagine-linked glycosylation 3 homolog                            | 1.031 | 83.95 | 0.9493  | 35388 P | 1.063  | 22.1  | 0.36585 | 7111  |
| Ccnl2         | A_52_P625745 | AK048244     | cyclin L2                                                            | 1.031 | 84.52 | 0.97247 | 37739 P | 1.232  | 8.32  | 0.2522  | 5685  |
| D930017K21Rik | A_52_P163201 | XM_988017    | RIKEN cDNA D930017K21 gene                                           | 1.031 | 84.22 | 0.94883 | 32766 M | 1.11   | 9.71  | 0.13943 | 3837  |
| Ddx17         | A_52_P272693 | NM_199079    | DEAD (Asp-Glu-Ala-Asp) box polypeptide                               | 1.031 | 84.56 | 0.97883 | 38384 P | 1.131  | 13.58 | 0.31612 | 6539  |
| Dhrsx         | A_51_P102867 | NM_001033326 | dehydrogenase/reductase (SDR family) X                               | 1.031 | 83.95 | 0.94944 | 35398 P | -1.066 | 42.43 | 0.50522 | 8627  |
| Epb4.1        | A_52_P397313 | AK019923     | erythrocyte protein band 4.1                                         | 1.031 | 84.4  | 0.96857 | 37335 P | 1.07   | 16.2  | 0.22856 | 5337  |
| Hspb1         | A_52_P404533 | NM_013560    | heat shock protein 1                                                 | 1.031 | 84.52 | 0.97767 | 38246 P | -1.103 | 8.32  | 0.07486 | 2528  |
| Igsf10        | A_51_P155843 | XM_887155    | immunoglobulin superfamily, member 10                                | 1.031 | 84.22 | 0.96045 | 36436 P | 1.087  | 16.2  | 0.29193 | 6235  |
| Jag2          | A_51_P451338 | NM_010588    | jagged 2                                                             | 1.031 | 84.4  | 0.96369 | 36793 P | 1.102  | 9.71  | 0.08446 | 2770  |
| Lcp1          | A_51_P275302 | NM_008879    | lymphocyte cytosolic protein 1                                       | 1.031 | 84.56 | 0.97889 | 38409 P | -1.091 | 38.4  | 0.50239 | 8608  |
| Nt5c3         | A_52_P77837  | NM_026004    | 5'-nucleotidase, cytosolic III                                       | 1.031 | 84.22 | 0.95861 | 36283 P | 1.086  | 25.31 | 0.39055 | 6837  |
| Nup107        | A_52_P284814 | NM_134010    | nucleoporin 107                                                      | 1.031 | 84.4  | 0.96573 | 37064 P | 1.013  | 42.43 | 0.78278 | 11028 |
| Pik3ca        | A_52_P265002 | NM_008839    | phosphatidylinositol 3-kinase, catalytic, alpha                      | 1.031 | 84.4  | 0.9648  | 36852 P | 1.106  | 11.33 | 0.14256 | 3896  |
| Sema3d        | A_52_P649623 | NM_028882    | sema domain, immunoglobulin domain (class 3)                         | 1.031 | 84.4  | 0.9833  | 29235 A | 1.139  | 8.32  | 0.10129 | 3131  |
| 1810053B23Rik | A_52_P236288 | AK007854     | RIKEN cDNA 1810053B23 gene                                           | 1.03  | 84.4  | 0.97186 | 34313 M | 1.013  | 42.43 | 0.81548 | 11329 |

|               |               |              |                                              |       |       |         |         |        |       |         |       |
|---------------|---------------|--------------|----------------------------------------------|-------|-------|---------|---------|--------|-------|---------|-------|
| Acbcb6        | A_51_P161342  | NM_023732    | ATP-binding cassette, sub-family B (MDR/     | 1.03  | 84.56 | 0.97879 | 38375 P | -1.046 | 43.15 | 0.39811 | 7500  |
| Bach1         | A_52_P412465  | NM_007520    | BTB and CNC homology 1                       | 1.03  | 84.4  | 0.96489 | 36892 P | 1.103  | 11.33 | 0.13742 | 3800  |
| Bcl2          | A_52_P438280  | AK077913     | B-cell leukemia/lymphoma 2                   | 1.03  | 84.52 | 0.97699 | 38181 P | 1.001  | 42.43 | 0.98176 | 12875 |
| Cnih          | A_51_P399625  | NM_009919    | cornichon homolog (Drosophila)               | 1.03  | 84.22 | 0.96837 | 25699 M | 1.041  | 28.13 | 0.43844 | 7907  |
| Depdc5        | A_52_P425813  | NM_177786    | DEP domain containing 5                      | 1.03  | 83.36 | 0.96474 | 31003 M | 1.04   | 28.13 | 0.3643  | 7078  |
| Grin11a       | A_51_P183853  | NM_178602    | glutamate receptor, ionotropic, N-methyl     | 1.03  | 84.52 | 0.98036 | 26142 M | 1.17   | 6.98  | 0.10589 | 3207  |
| Leprot        | A_51_P394690  | NM_175036    | leptin receptor overlapping transcript       | 1.03  | 84.56 | 0.97926 | 38432 P | 1.061  | 19.02 | 0.25689 | 5763  |
| Pap           | A_51_P169671  | NM_011036    | pancreatitis-associated protein              | 1.03  | 79.26 | 0.9929  | 32507 P | -1.702 | 0.51  | 0.02745 | 1115  |
| Pdcd6         | A_51_P431903  | NM_011051    | programmed cell death 6                      | 1.03  | 84.4  | 0.96328 | 36772 P | -1.081 | 28.13 | 0.21983 | 5203  |
| Rgmb          | A_52_P620154  | AK028583     | RGM domain family, member B                  | 1.03  | 84.56 | 0.98905 | 39843 P | -1.122 | 16.2  | 0.19898 | 4884  |
| Ube2l3        | A_52_P284162  | NM_009456    | ubiquitin-conjugating enzyme E2L 3           | 1.03  | 84.4  | 0.97194 | 37608 P | 1.174  | 3.01  | 0.02196 | 933   |
| Uqcrb         | A_51_P472671  | NM_026219    | ubiquinol-cytochrome c reductase bindin      | 1.03  | 84.52 | 0.97577 | 38043 P | 1.091  | 11.33 | 0.11899 | 3468  |
| Wbp4          | A_51_P334604  | NM_018765    | WW domain binding protein 4                  | 1.03  | 84.4  | 0.96967 | 37390 P | 1.235  | 1.58  | 0.01123 | 431   |
| 2610019P18Rik | A_52_P161400  | NM_178612    | RIKEN cDNA 2610019P18 gene                   | 1.029 | 83.36 | 0.94783 | 35252 P | 1.049  | 19.02 | 0.25455 | 5730  |
| 4932417H02Rik | A_51_P131480  | AK016530     | RIKEN cDNA 4932417H02 gene                   | 1.029 | 84.22 | 0.98946 | 26528 M | 1.008  | 42.43 | 0.88033 | 11865 |
| AA987161      | A_51_P223737  | XM_981751    | expressed sequence AA987161                  | 1.029 | 84.4  | 0.96629 | 37132 P | 1.11   | 16.2  | 0.36615 | 7117  |
| Ide           | A_51_P299644  | NM_031156    | insulin degrading enzyme                     | 1.029 | 84.4  | 0.96549 | 37019 P | 1.05   | 25.31 | 0.36027 | 7021  |
| Ltbp4         | A_51_P403536  | NM_175641    | latent transforming growth factor beta bi    | 1.029 | 84.52 | 0.9731  | 37772 P | 1.065  | 22.1  | 0.41166 | 7628  |
| Mef2d         | A_52_P334052  | AK141270     | myocyte enhancer factor 2D                   | 1.029 | 84.4  | 0.97042 | 37461 P | 1.071  | 19.02 | 0.27641 | 6048  |
| Msc           | A_52_P594410  | NM_010827    | musculin                                     | 1.029 | 83.95 | 0.96279 | 30915 M | 1.002  | 42.43 | 0.97374 | 12773 |
| Ppic          | A_51_P161086  | NM_008908    | peptidylprolyl isomerase C                   | 1.029 | 84.56 | 0.98238 | 39037 P | 1.142  | 8.32  | 0.14174 | 3877  |
| Ptx3          | A_51_P374726  | NM_008987    | pentraxin related gene                       | 1.029 | 83.95 | 0.96257 | 30893 M | 1.099  | 8.32  | 0.07361 | 2500  |
| Rab17         | A_51_P382214  | NM_008998    | RAB17, member RAS oncogene family            | 1.029 | 75.14 | 0.96549 | 28378 M | 1.057  | 22.1  | 0.32196 | 6585  |
| Serpini1      | A_52_P220573  | NM_009250    | serine (or cysteine) peptidase inhibitor, cl | 1.029 | 84.4  | 0.96703 | 37194 P | 1.097  | 8.32  | 0.07034 | 2405  |
| Ssr3          | A_52_P357858  | NM_026155    | signal sequence receptor, gamma              | 1.029 | 84.4  | 0.97483 | 25937 M | 1.275  | 2.53  | 0.0487  | 1815  |
| Tbc1d7        | A_51_P425737  | NM_025935    | TBC1 domain family, member 7                 | 1.029 | 83.95 | 0.95102 | 35559 P | 1.094  | 9.71  | 0.10456 | 3198  |
| Vtn           | A_51_P109840  | NM_011707    | vitronectin                                  | 1.029 | 84.56 | 0.98482 | 39252 P | 1.048  | 22.1  | 0.28627 | 6178  |
| Zfp426        | A_51_P473240  | NM_146221    | zinc finger protein 426                      | 1.029 | 84.22 | 0.95967 | 36350 P | -1.248 | 3.01  | 0.11669 | 3415  |
| 2410104I19Rik | A_51_P177583  | NM_028364    | RIKEN cDNA 2410104I19 gene                   | 1.028 | 84.4  | 0.97197 | 37636 P | -1.054 | 42.43 | 0.3919  | 7418  |
| Anp32e        | A_52_P125350  | NM_023210    | acidic (leucine-rich) nuclear phosphoprot    | 1.028 | 84.22 | 0.95967 | 36346 P | 1.097  | 16.2  | 0.30072 | 6329  |
| Apeh          | A_51_P407977  | NM_146226    | acylpeptide hydrolase                        | 1.028 | 84.22 | 0.96244 | 36680 P | 1.033  | 33.49 | 0.55872 | 9093  |
| Cyb561d2      | A_51_P103509  | NM_019720    | cytochrome b-561 domain containing 2         | 1.028 | 84.22 | 0.95937 | 36326 P | 1.003  | 42.43 | 0.96288 | 12694 |
| D130095D21Rik | A_52_P1180575 | AK084110     | RIKEN cDNA D130095D21 gene                   | 1.028 | 84.4  | 0.9648  | 36857 M | -1.002 | 49.48 | 0.96621 | 12714 |
| Dnrtip1       | A_51_P500424  | NM_133763    | deoxynucleotidyltransferase, terminal, int   | 1.028 | 84.52 | 0.97449 | 37899 P | 1.025  | 38.4  | 0.69138 | 10248 |
| Dusp18        | A_52_P493795  | NM_173745    | dual specificity phosphatase 18              | 1.028 | 84.56 | 0.97883 | 38385 P | -1.067 | 36.07 | 0.31286 | 6491  |
| Fosb          | A_51_P138378  | NM_008036    | FBJ osteosarcoma oncogene B                  | 1.028 | 84.56 | 0.98663 | 26421 M | 1.138  | 9.71  | 0.15486 | 4125  |
| Ifng          | A_51_P220976  | NM_008337    | interferon gamma                             | 1.028 |       | 0.98503 | 19608 A | -1.275 | 0.66  | 0.01692 | 732   |
| Kcnd3         | A_51_P104290  | NM_019931    | potassium voltage-gated channel, Shal-re     | 1.028 | 82.34 | 0.97987 | 29031 M | 1.042  | 28.13 | 0.3631  | 7061  |
| Mtdh          | A_51_P195622  | AK035302     | Metadherin                                   | 1.028 | 83.95 | 0.95254 | 35768 P | 1.017  | 40.63 | 0.79807 | 11160 |
| Nfatc2        | A_52_P73436   | AK081853     | nuclear factor of activated T-cells, cytopla | 1.028 | 84.56 | 0.98123 | 38822 P | 1.052  | 19.02 | 0.25011 | 5641  |
| Nsd1          | A_52_P287576  | AK036308     |                                              | 1.028 | 84.22 | 0.96115 | 36496 P | 1.025  | 38.4  | 0.70529 | 10365 |
| Nxf1          | A_51_P356229  | NM_016813    | nuclear RNA export factor 1 homolog (S. c    | 1.028 | 84.56 | 0.97961 | 38486 P | -1.308 | 0.51  | 0.00977 | 356   |
| Psmc1         | A_52_P49727   | NM_027357    | proteasome (prosome, macropain) 26S su       | 1.028 | 84.4  | 0.96973 | 37392 P | 1.183  | 4.63  | 0.06153 | 2182  |
| Pxmp4         | A_52_P625683  | NM_021534    | peroxisomal membrane protein 4               | 1.028 | 84.56 | 0.98078 | 38597 P | -1.054 | 36.07 | 0.25967 | 5805  |
| Rab7          | A_51_P136883  | NM_009005    | RAB7, member RAS oncogene family             | 1.028 | 84.56 | 0.98078 | 26186 M | 1.193  | 6.98  | 0.14358 | 3915  |
| Sox2          | A_52_P307739  | NM_011443    | SRY-box containing gene 2                    | 1.028 | 81.02 | 0.9617  | 30845 M | 1.134  | 4.63  | 0.03749 | 1430  |
| Spag7         | A_51_P335583  | NM_172561    | sperm associated antigen 7                   | 1.028 | 84.22 | 0.95861 | 36279 P | -1.017 | 49.48 | 0.77026 | 10932 |
| Zfp36l2       | A_51_P406265  | NM_001001806 | zinc finger protein 36, C3H type-like 2      | 1.028 | 83.36 | 0.96495 | 33898 M | 1.181  | 3.82  | 0.03814 | 1449  |
| 2310065K24Rik | A_52_P128356  | NM_028221    | RIKEN cDNA 2310065K24 gene                   | 1.027 | 84.56 | 0.98078 | 38604 P | -1.164 | 2.04  | 0.03542 | 1373  |
| Aip           | A_51_P205737  | NM_016666    | aryl-hydrocarbon receptor-interacting pro    | 1.027 | 84.4  | 0.96415 | 36815 P | 1.043  | 25.31 | 0.34661 | 6832  |
| Crebbp        | A_51_P448224  | S66385       | CREB binding protein                         | 1.027 | 84.22 | 0.95967 | 36345 P | 1.024  | 40.63 | 0.80573 | 11230 |
| Ctso          | A_52_P317043  | NM_177662    | cathepsin O                                  | 1.027 | 84.56 | 0.97828 | 38331 P | -1.008 | 49.48 | 0.88304 | 11896 |
| Gab2          | A_51_P194613  | NM_010248    | growth factor receptor bound protein 2-a     | 1.027 |       | 0.9735  | 25858 A | 1.073  | 13.58 | 0.12865 | 3671  |

|               |              |              |                                            |       |       |         |         |        |       |         |       |
|---------------|--------------|--------------|--------------------------------------------|-------|-------|---------|---------|--------|-------|---------|-------|
| Itgb1         | A_51_P286527 | NM_010578    | integrin beta 1 (fibronectin receptor beta | 1.027 | 84.4  | 0.97197 | 37626 P | 1.048  | 33.49 | 0.67849 | 10123 |
| Itgb4         | A_52_P143287 | NM_001005608 | integrin beta 4                            | 1.027 | 84.56 | 0.98654 | 39390 P | 1.01   | 42.43 | 0.87093 | 11763 |
| Mapk8ip1      | A_52_P349477 | AK053819     | mitogen activated protein kinase 8 intera  | 1.027 | 82.34 | 0.97772 | 34689 P | -1.022 | 48.7  | 0.69895 | 10307 |
| Matn4         | A_51_P264934 | NM_013592    | matrilin 4                                 | 1.027 | 83.95 | 0.95478 | 35861 M | -1.137 | 3.01  | 0.03657 | 1405  |
| Mrpl10        | A_51_P384640 | NM_026154    | mitochondrial ribosomal protein L10        | 1.027 | 84.4  | 0.96487 | 36884 P | 1.029  | 33.49 | 0.49722 | 8545  |
| Mrpl2         | A_51_P517138 | NM_025302    | mitochondrial ribosomal protein L2         | 1.027 | 84.4  | 0.96549 | 37030 P | 1.056  | 25.31 | 0.38834 | 7379  |
| Nradd         | A_51_P405227 | NM_026012    | neurotrophin receptor associated death c   | 1.026 | 84.4  | 0.96696 | 37166 P | -1.059 | 33.49 | 0.24984 | 5637  |
| Nrarp         | A_51_P504354 | NM_025980    | Notch-regulated ankyrin repeat protein     | 1.026 | 84.52 | 0.97483 | 37990 P | -1.008 | 49.48 | 0.92381 | 12331 |
| Pon3          | A_51_P256665 | NM_173006    | paraoxonase 3                              | 1.026 | 84.52 | 0.97221 | 37728 P | 1.098  | 11.33 | 0.12728 | 3649  |
| Ptpn9         | A_52_P132407 | AK086096     | protein tyrosine phosphatase, non-recept   | 1.026 | 84.4  | 0.97038 | 37443 P | 1.216  | 1.62  | 0.01293 | 561   |
| Rab711        | A_51_P377004 | NM_144875    | RAB7, member RAS oncogene family-like      | 1.026 | 84.52 | 0.97199 | 37646 P | 1.093  | 11.33 | 0.11684 | 3417  |
| Sort1         | A_51_P517145 | NM_019972    | sortilin 1                                 | 1.026 | 84.4  | 0.9696  | 37376 P | -1.189 | 1.32  | 0.02536 | 1048  |
| Ube1x         | A_52_P616047 | NM_009457    | ubiquitin-activating enzyme E1, Chr X      | 1.026 | 84.22 | 0.9617  | 36619 P | 1.042  | 30.75 | 0.51573 | 8729  |
| 2310002F09Rik | A_52_P415836 | AK009091     | RIKEN cDNA 2310002F09 gene                 | 1.025 | 84.56 | 0.98238 | 32047 M | -1.042 | 44.4  | 0.52163 | 8763  |
| 2310007F21Rik | A_51_P268343 | NM_025857    | RIKEN cDNA 2310007F21 gene                 | 1.025 | 84.22 | 0.9617  | 36618 P | -1.019 | 49    | 0.70255 | 10340 |
| 2310036O22Rik | A_51_P286321 | NM_026760    | RIKEN cDNA 2310036O22 gene                 | 1.025 | 83.95 | 0.9583  | 36228 P | -1.008 | 49.48 | 0.872   | 11786 |
| B3galnt2      | A_51_P158120 | NM_178640    | UDP-GalNAc:betaGlcNAc beta 1,3-galacto     | 1.025 | 84.22 | 0.96163 | 36562 P | 1      | 49.48 | 0.99892 | 13052 |
| Cck           | A_52_P539124 | BC028487     | cholecystokinin                            | 1.025 | 84.22 | 0.96779 | 31242 M | 1.01   | 42.43 | 0.82952 | 11445 |
| Dirc2         | A_51_P416059 | NM_153550    | disrupted in renal carcinoma 2 (human)     | 1.025 | 84.4  | 0.96696 | 37167 M | 1.132  | 6.98  | 0.07266 | 2458  |
| Jund1         | A_51_P357744 | NM_010592    | Jun proto-oncogene related gene d1         | 1.025 | 84.56 | 0.98815 | 26488 M | -1.012 | 49.48 | 0.8733  | 11788 |
| Kcnk1         | A_52_P642488 | NM_008430    | potassium channel, subfamily K, member     | 1.025 | 84.52 | 0.97699 | 28928 M | 1.092  | 9.71  | 0.07717 | 2576  |
| Maff          | A_52_P608322 | NM_010755    | v-maf musculoaponeurotic fibrosarcoma      | 1.025 | 81.02 | 0.98951 | 32413 P | 1.088  | 11.33 | 0.11855 | 3452  |
| Mpdz          | A_51_P414948 | NM_010820    | multiple PDZ domain protein                | 1.025 | 84.56 | 0.97874 | 38365 P | 1.011  | 42.43 | 0.81601 | 11336 |
| Mrpl20        | A_51_P413698 | NM_025570    | mitochondrial ribosomal protein L20        | 1.025 | 84.52 | 0.97197 | 37628 P | -1.103 | 16.2  | 0.16248 | 4266  |
| Pdha1         | A_52_P581435 | NM_008810    | pyruvate dehydrogenase E1 alpha 1          | 1.025 | 84.52 | 0.97217 | 37703 P | -1.02  | 49    | 0.69292 | 10265 |
| Tax1bp1       | A_51_P403277 | NM_025816    | Tax1 (human T-cell leukemia virus type I)  | 1.025 | 84.56 | 0.98078 | 38637 P | 1.049  | 30.75 | 0.5827  | 9283  |
| Tpt1          | A_52_P667098 | NM_009429    | tumor protein, translationally-controlled  | 1.025 | 84.4  | 0.97577 | 25968 M | 1.155  | 6.98  | 0.11932 | 3472  |
| Usp8          | A_51_P382718 | NM_019729    | ubiquitin specific peptidase 8             | 1.025 | 84.4  | 0.97049 | 37496 P | 1.072  | 16.2  | 0.21734 | 5158  |
| Aebp2         | A_52_P23212  | NM_009637    | AE binding protein 2                       | 1.024 | 84.52 | 0.97618 | 38111 P | 1.051  | 22.1  | 0.28555 | 6158  |
| D030070L09Rik | A_51_P272206 | NM_172625    | RIKEN cDNA D030070L09 gene                 | 1.024 | 84.52 | 0.97492 | 38009 P | -1.048 | 40.63 | 0.29697 | 6292  |
| F7            | A_51_P484054 | NM_010172    | coagulation factor VII                     | 1.024 | 84.56 | 0.97452 | 31567 M | 1.035  | 30.75 | 0.44179 | 7934  |
| Jarid1b       | A_52_P584874 | NM_152895    | jumonji, AT rich interactive domain 1B (R  | 1.024 | 84.56 | 0.98413 | 39209 P | -1.221 | 0.56  | 0.00985 | 370   |
| Ndufb10       | A_51_P516615 | NM_026684    | NADH dehydrogenase (ubiquinone) 1 bet      | 1.024 | 84.22 | 0.96163 | 36529 P | 1.05   | 25.31 | 0.32455 | 6609  |
| Parp11        | A_51_P452227 | NM_181402    | poly (ADP-ribose) polymerase family, mer   | 1.024 | 84.22 | 0.9648  | 36872 P | 1.117  | 5.75  | 0.04581 | 1716  |
| Phyh          | A_51_P276063 | NM_010726    | phytanoyl-CoA hydroxylase                  | 1.024 | 84.52 | 0.97197 | 37630 P | -1.07  | 40.63 | 0.46285 | 8138  |
| Pitpnm1       | A_51_P103000 | NM_008851    | phosphatidylinositol membrane-associate    | 1.024 | 84.56 | 0.98187 | 38987 P | 1.059  | 19.02 | 0.20743 | 5018  |
| Tagln3        | A_52_P265938 | NM_019754    | transgelin 3                               | 1.024 | 84.56 | 0.97956 | 38468 P | 1.059  | 22.1  | 0.32455 | 6611  |
| Wdr36         | A_51_P140819 | BC069869     | WD repeat domain 36                        | 1.024 | 84.22 | 0.96489 | 36906 P | 1.054  | 25.31 | 0.43834 | 7906  |
| 2310061I04Rik | A_52_P180565 | BC100355     | RIKEN cDNA 2310061I04 gene                 | 1.023 | 84.4  | 0.97013 | 37415 P | -1.086 | 16.2  | 0.11192 | 3315  |
| Car3          | A_52_P639461 | AK075630     | carbonic anhydrase 3                       | 1.023 | 84.56 | 0.98064 | 38562 M | -1.385 | 2.04  | 0.16039 | 4222  |
| Clns1a        | A_51_P114854 | NM_023671    | chloride channel, nucleotide-sensitive, 1A | 1.023 | 84.52 | 0.9761  | 38087 P | 1.007  | 42.43 | 0.90748 | 12165 |
| D16Bwg1543e   | A_52_P399717 | AK149652     | DNA segment, Chr 16, Brigham & Womer       | 1.023 | 84.56 | 0.97748 | 38230 P | -1.279 | 0.51  | 0.00731 | 243   |
| Kcnc3         | A_52_P337326 | NM_008422    | potassium voltage gated channel, Shaw-r    | 1.023 | 84.22 | 0.96504 | 36994 P | -1.044 | 42.43 | 0.33795 | 6758  |
| Prepl         | A_52_P230793 | AK013363     | prolyl endopeptidase-like                  | 1.023 | 84.22 | 0.96495 | 36937 P | 1.053  | 19.02 | 0.23721 | 5450  |
| Rem1          | A_52_P674374 | NM_009047    | rad and gem related GTP binding protein    | 1.023 | 84.4  | 0.96634 | 37138 P | 1.068  | 13.58 | 0.14542 | 3950  |
| Usp12         | A_51_P467573 | NM_011669    | ubiquitin specific peptidase 12            | 1.023 | 84.4  | 0.96895 | 37352 P | 1.23   | 2.53  | 0.03158 | 1241  |
| 2010002N04Rik | A_51_P156857 | NM_134133    | RIKEN cDNA 2010002N04 gene                 | 1.022 | 84.52 | 0.97358 | 37841 P | 1.12   | 8.32  | 0.09446 | 2989  |
| 2610008E11Rik | A_52_P161087 | NM_001004362 | RIKEN cDNA 2610008E11 gene                 | 1.022 | 84.52 | 0.97483 | 37946 P | 1.078  | 19.02 | 0.30377 | 6361  |
| Add1          | A_51_P282404 | NM_013457    | adducin 1 (alpha)                          | 1.022 | 84.4  | 0.96696 | 37175 P | 1.13   | 9.71  | 0.1534  | 4095  |
| Atp7a         | A_51_P473179 | AK033254     | ATPase, Cu++ transporting, alpha polypep   | 1.022 | 84.22 | 0.96573 | 37065 P | 1.09   | 13.58 | 0.19142 | 4759  |
| Cd86          | A_51_P174723 | NM_019388    | CD86 antigen                               | 1.022 | 84.56 | 0.98946 | 39918 P | -1.056 | 40.63 | 0.36655 | 7120  |
| Cog4          | A_52_P54235  | AK040321     | component of oligomeric golgi complex 4    | 1.022 | 84.56 | 0.97949 | 29009 M | -1.02  | 49    | 0.70719 | 10386 |
| Nme2          | A_51_P517988 | NM_001077529 | expressed in non-metastatic cells 2, prote | 1.022 | 84.52 | 0.97958 | 26114 M | 1.078  | 19.02 | 0.35632 | 6972  |



|               |              |              |                                              |       |       |         |         |        |       |         |       |
|---------------|--------------|--------------|----------------------------------------------|-------|-------|---------|---------|--------|-------|---------|-------|
| Slc27a1       | A_51_P117477 | NM_011977    | solute carrier family 27 (fatty acid transp  | 1.022 | 84.56 | 0.98765 | 39533 P | -1.034 | 44.4  | 0.45191 | 8013  |
| Spg20         | A_51_P394269 | AK129171     | spastic paraplegia 20, spartin (Troyer syn   | 1.022 | 79.26 | 0.97889 | 31795 P | 1.223  | 1.62  | 0.01293 | 562   |
| Tpd52l1       | A_51_P482503 | NM_009413    | tumor protein D52-like 1                     | 1.022 | 84.56 | 0.97987 | 38496 P | 1.178  | 5.75  | 0.08441 | 2764  |
| Tubgcp6       | A_51_P444069 | AK052293     | tubulin, gamma complex associated prote      | 1.022 | 84.4  | 0.96762 | 37241 P | -1.073 | 25.31 | 0.16909 | 4370  |
| Zfp511        | A_51_P156263 | BC065404     | zinc finger protein 511                      | 1.022 | 84.56 | 0.97818 | 38328 P | -1.012 | 49.48 | 0.80819 | 11258 |
| 4921511H13Rik | A_52_P370453 | AK017495     | RIKEN cDNA 4921511H13 gene                   | 1.021 | 84.56 | 0.97767 | 38244 M | 1.069  | 11.33 | 0.31283 | 6034  |
| 4930422G04Rik | A_51_P294161 | BC030185     | RIKEN cDNA 4930422G04 gene                   | 1.021 | 84.56 | 0.98644 | 39362 P | -1.157 | 1.62  | 0.02439 | 1013  |
| BC057627      | A_52_P273161 | NM_198631    | cDNA sequence BC057627                       | 1.021 | 84.52 | 0.97577 | 38046 P | 1.106  | 16.2  | 0.37093 | 7181  |
| Btrc          | A_52_P98674  | NM_009771    | beta-transducin repeat containing protei     | 1.021 | 84.52 | 0.97218 | 37716 P | -1.007 | 49.48 | 0.94108 | 12491 |
| Cul4b         | A_51_P120948 | NM_028288    | cullin 4B                                    | 1.021 | 84.52 | 0.97345 | 37828 P | -1.005 | 49.48 | 0.9506  | 12591 |
| Eaf1          | A_51_P419959 | NM_028932    | ELL associated factor 1                      | 1.021 | 83.95 | 0.98173 | 35016 P | 1.337  | 1.17  | 0.01496 | 643   |
| Lsm5          | A_51_P336790 | NM_025520    | LSM5 homolog, U6 small nuclear RNA ass       | 1.021 | 84.56 | 0.98769 | 39539 P | -1.088 | 19.02 | 0.14582 | 3960  |
| Mllt3         | A_52_P530665 | NM_027326    | myeloid/lymphoid or mixed lineage-leuke      | 1.021 | 84.56 | 0.98109 | 38709 P | 1.067  | 25.31 | 0.47276 | 8223  |
| Nedd4         | A_51_P295022 | NM_010890    | neuronal precursor cell expressed, develo    | 1.021 | 83.36 | 0.97345 | 34436 P | 1.258  | 2.53  | 0.03188 | 1257  |
| Nr2c2         | A_51_P368265 | NM_011630    | nuclear receptor subfamily 2, group C, me    | 1.021 | 84.4  | 0.97143 | 37567 P | 1.091  | 16.2  | 0.25778 | 5783  |
| Pgam1         | A_51_P342669 | NM_023418    | phosphoglycerate mutase 1                    | 1.021 | 84.56 | 0.98413 | 26354 M | 1.018  | 40.63 | 0.78568 | 11053 |
| Ptprs         | A_52_P90747  | NM_011218    | protein tyrosine phosphatase, receptor ty    | 1.021 | 83.36 | 0.97435 | 34477 M | 1.11   | 8.32  | 0.0655  | 2299  |
| Rnf41         | A_52_P48398  | NM_026259    | ring finger protein 41                       | 1.021 | 84.52 | 0.9735  | 37836 P | 1.039  | 33.49 | 0.5912  | 9340  |
| Vamp8         | A_52_P279152 | NM_016794    | vesicle-associated membrane protein 8        | 1.021 | 84.56 | 0.98562 | 39331 P | 1.009  | 42.43 | 0.88504 | 11924 |
| Zfml          | A_52_P543391 | NM_008717    | zinc finger, matrin-like                     | 1.021 | 84.56 | 0.98064 | 38575 P | -1.177 | 2.53  | 0.04505 | 1672  |
| 1500003O03Rik | A_52_P608024 | NM_019769    | RIKEN cDNA 1500003O03 gene                   | 1.02  | 84.56 | 0.98109 | 38743 P | 1.141  | 6.98  | 0.08605 | 2793  |
| Adcy3         | A_51_P484671 | NM_138305    | adenylate cyclase 3                          | 1.02  | 84.4  | 0.96965 | 37385 M | 1.137  | 4.63  | 0.03224 | 1266  |
| B230308N11Rik | A_52_P67958  | AK083707     | RIKEN cDNA B230308N11 gene                   | 1.02  | 84.56 | 0.98946 | 39907 M | 1.073  | 22.1  | 0.37146 | 7188  |
| C730036D15Rik | A_51_P213515 | NM_145368    | RIKEN cDNA C730036D15 gene                   | 1.02  | 79.26 | 0.98815 | 32314 M | 1.01   | 42.43 | 0.83494 | 11493 |
| Csf2rb1       | A_52_P492939 | NM_007780    | colony stimulating factor 2 receptor, beta   | 1.02  |       | 0.98187 | 26259 A | 1.104  | 9.71  | 0.10198 | 3150  |
| Grik5         | A_51_P428754 | NM_008168    | glutamate receptor, ionotropic, kainate 5    | 1.02  | 84.56 | 0.98663 | 39413 P | 1.032  | 30.75 | 0.48401 | 8379  |
| Itga8         | A_52_P658911 | NM_001001309 | integrin alpha 8                             | 1.02  | 84.22 | 0.97699 | 31659 M | -1.018 | 49.48 | 0.80093 | 11185 |
| Map2k4        | A_51_P471440 | NM_009157    | mitogen activated protein kinase kinase 4    | 1.02  | 84.52 | 0.97483 | 37997 P | -1.033 | 45.05 | 0.48068 | 8313  |
| Papd4         | A_51_P325374 | NM_133905    | PAP associated domain containing 4           | 1.02  | 84.4  | 0.97275 | 37747 P | 1.155  | 3.01  | 0.02156 | 906   |
| Pbx2          | A_52_P339182 | NM_017463    | pre B-cell leukemia transcription factor 2   | 1.02  | 84.56 | 0.97889 | 38400 P | 1.088  | 9.71  | 0.08811 | 2846  |
| Psma7         | A_51_P233603 | NM_011969    | proteasome (prosome, macropain) subun        | 1.02  | 84.56 | 0.97801 | 38292 P | 1.02   | 40.63 | 0.8236  | 11397 |
| Tceb1         | A_51_P172872 | NM_026456    | transcription elongation factor B (SIII), po | 1.02  | 84.52 | 0.97286 | 37758 P | 1.02   | 38.4  | 0.69683 | 10287 |
| Trps1         | A_51_P513032 | AK078617     | trichorhinophalangeal syndrome I (human      | 1.02  | 84.56 | 0.98165 | 38927 P | 1.035  | 30.75 | 0.46431 | 8156  |
| Vgll1         | A_51_P214360 | NM_133251    | vestigial like 1 homolog (Drosophila)        | 1.02  | 84.56 | 0.98165 | 38934 P | 1.018  | 38.4  | 0.70082 | 10325 |
| A230051G13Rik | A_52_P608460 | NM_173785    | RIKEN cDNA A230051G13 gene                   | 1.019 | 84.52 | 0.97543 | 38030 P | -1.234 | 1.1   | 0.02119 | 900   |
| A630042L21Rik | A_52_P431965 | NM_134134    | RIKEN cDNA A630042L21 gene                   | 1.019 | 84.56 | 0.98815 | 39750 P | -1.077 | 22.1  | 0.15824 | 4183  |
| Bag3          | A_51_P371174 | NM_013863    | Bcl2-associated athanogene 3                 | 1.019 | 84.56 | 0.98078 | 38629 P | 1.085  | 11.33 | 0.11809 | 3439  |
| Capza1        | A_52_P401345 | NM_009797    | capping protein (actin filament) muscle Z    | 1.019 | 84.56 | 0.98214 | 39009 P | 1.099  | 9.71  | 0.07994 | 2654  |
| Cyp2d10       | A_52_P527775 | NM_010005    | cytochrome P450, family 2, subfamily d, p    | 1.019 | 84.4  | 0.97211 | 37693 P | -1.019 | 49    | 0.70575 | 10373 |
| D930036F22Rik | A_51_P430002 | NM_177171    | HEAT repeat containing 5A                    | 1.019 | 84.56 | 0.97874 | 38368 P | -1.019 | 48.39 | 0.65026 | 9884  |
| Elt1          | A_51_P480328 | NM_133222    | EGF, latrophilin seven transmembrane do      | 1.019 | 84.56 | 0.97862 | 38350 P | 1.056  | 30.75 | 0.5959  | 9410  |
| Eno1          | A_52_P349939 | NM_023119    | enolase 1, alpha non-neuron                  | 1.019 | 84.56 | 0.98815 | 39641 P | 1.02   | 40.63 | 0.74347 | 10737 |
| Med28         | A_52_P362245 | NM_025895    | mediator of RNA polymerase II transcripti    | 1.019 | 84.56 | 0.97769 | 38261 P | 1.09   | 11.33 | 0.12623 | 3637  |
| Ndst1         | A_51_P189142 | NM_008306    | N-deacetylase/N-sulfotransferase (hepar      | 1.019 | 84.4  | 0.97061 | 37500 P | 1.105  | 11.33 | 0.16286 | 4271  |
| Ndst2         | A_51_P377390 | NM_010811    | N-deacetylase/N-sulfotransferase (hepar      | 1.019 | 84.56 | 0.97879 | 38380 P | -1.245 | 0.51  | 0.00726 | 232   |
| Nek7          | A_51_P295442 | NM_021605    | NIMA (never in mitosis gene a)-related ex    | 1.019 | 84.56 | 0.98558 | 26388 M | 1.02   | 38.4  | 0.66052 | 9977  |
| Rbm18         | A_52_P59544  | AK036220     | RNA binding motif protein 18                 | 1.019 | 84.56 | 0.97949 | 38446 P | 1.171  | 3.01  | 0.02195 | 931   |
| Sirt2         | A_51_P110068 | NM_022432    | sirtuin 2 (silent mating type information r  | 1.019 | 84.52 | 0.97485 | 38002 P | -1.085 | 16.2  | 0.10964 | 3256  |
| Tnrc6c        | A_51_P321563 | AK147471     | trinucleotide repeat containing 6C           | 1.019 | 84.56 | 0.98147 | 38849 P | 1.012  | 42.43 | 0.88148 | 11873 |
| Ube2a         | A_52_P139093 | NM_019668    | ubiquitin-conjugating enzyme E2A, RAD6       | 1.019 | 84.52 | 0.97618 | 38106 P | 1.071  | 22.1  | 0.37588 | 7233  |
| 1810033M07Rik | A_51_P321290 | AK007800     | endoplasmic reticulum protein 27             | 1.018 |       | 0.98896 | 19740 A | -1.204 | 0.66  | 0.0108  | 423   |
| Arhgap23      | A_51_P310307 | AK016967     | RIKEN cDNA 4933428G20 gene                   | 1.018 | 84.4  | 0.97769 | 34679 M | -1.078 | 30.75 | 0.2897  | 6207  |
| Cdan1         | A_52_P219913 | AK157271     | congenital dyserythropoietic anemia, typ     | 1.018 | 84.56 | 0.98279 | 39112 P | -1.156 | 3.82  | 0.07277 | 2466  |

|               |              |              |                                            |       |       |         |         |        |       |         |       |
|---------------|--------------|--------------|--------------------------------------------|-------|-------|---------|---------|--------|-------|---------|-------|
| Dnajc13       | A_52_P250590 | XM_135146    | Dnaj (Hsp40) homolog, subfamily C, mem     | 1.018 | 84.56 | 0.98109 | 38793 P | 1.145  | 9.71  | 0.17475 | 4471  |
| Nup88         | A_51_P237945 | NM_172394    | nucleoporin 88                             | 1.018 | 84.56 | 0.98184 | 38980 P | 1.123  | 8.32  | 0.08652 | 2814  |
| Osbpl9        | A_52_P194763 | NM_173350    | oxysterol binding protein-like 9           | 1.018 | 84.56 | 0.98687 | 39447 P | -1.073 | 22.1  | 0.14328 | 3908  |
| Ranbp3        | A_51_P146250 | AK154201     | RAN binding protein 3                      | 1.018 | 84.56 | 0.98815 | 39727 P | 1.122  | 11.33 | 0.24299 | 5539  |
| Tap2          | A_52_P86176  | NM_011530    | transporter 2, ATP-binding cassette, sub-f | 1.018 | 84.52 | 0.97483 | 37979 P | 1.046  | 28.13 | 0.40974 | 7605  |
| Tes           | A_52_P74441  | NM_011570    | testis derived transcript                  | 1.018 | 84.56 | 0.98078 | 38594 P | 1.157  | 8.32  | 0.17685 | 4511  |
| Zmynd19       | A_51_P390387 | AK086718     | zinc finger, MYND domain containing 19     | 1.018 | 84.52 | 0.97679 | 38158 P | 1.078  | 13.58 | 0.1352  | 3765  |
| 1110014N23Rik | A_51_P340604 | AK003717     | RIKEN cDNA 1110014N23 gene                 | 1.017 | 84.56 | 0.99106 | 40197 P | -1.156 | 1.18  | 0.01985 | 848   |
| 4932442K08Rik | A_52_P537852 | NM_024203    | RIKEN cDNA 4932442K08 gene                 | 1.017 | 84.56 | 0.98437 | 39233 P | 1.048  | 25.31 | 0.3867  | 7359  |
| Actr2         | A_51_P303906 | NM_146243    | ARP2 actin-related protein 2 homolog (ye   | 1.017 | 84.56 | 0.98898 | 26535 M | 1.103  | 11.33 | 0.1258  | 3623  |
| Arcn1         | A_52_P593318 | AK031385     | archain 1                                  | 1.017 | 84.56 | 0.98202 | 39003 P | 1.032  | 33.49 | 0.59505 | 9395  |
| Atp11b        | A_51_P146505 | NM_029570    | ATPase, Class VI, type 11B                 | 1.017 | 84.56 | 0.98294 | 26330 M | 1.071  | 19.02 | 0.25165 | 5670  |
| Cdh15         | A_51_P481930 | NM_007662    | cadherin 15                                | 1.017 | 84.56 | 0.97618 | 34606 M | -1.055 | 43.15 | 0.50737 | 8654  |
| Col16a1       | A_52_P556933 | NM_028266    | procollagen, type XVI, alpha 1             | 1.017 | 84.56 | 0.98264 | 32099 M | -1.034 | 45.68 | 0.5823  | 9278  |
| Ebag9         | A_51_P420045 | NM_019480    | estrogen receptor-binding fragment-asso    | 1.017 | 84.52 | 0.97651 | 38148 P | -1.021 | 48.39 | 0.6503  | 9886  |
| Elavl1        | A_52_P118640 | NM_010485    | ELAV (embryonic lethal, abnormal vision,   | 1.017 | 84.56 | 0.97987 | 38497 P | 1.122  | 4.63  | 0.03732 | 1420  |
| Fbxo31        | A_51_P356283 | NM_133765    | F-box protein 31                           | 1.017 | 84.56 | 0.97883 | 38386 P | 1.093  | 11.33 | 0.11078 | 3287  |
| Fzd2          | A_51_P404077 | NM_020510    | frizzled homolog 2 (Drosophila)            | 1.017 | 83.95 | 0.98229 | 32040 M | 1.108  | 8.32  | 0.0795  | 2646  |
| Glt8d1        | A_51_P152155 | NM_029626    | glycosyltransferase 8 domain containing 1  | 1.017 | 84.56 | 0.97861 | 38345 P | 1.171  | 5.75  | 0.09593 | 3012  |
| Mrps34        | A_51_P443702 | NM_023260    | mitochondrial ribosomal protein S34        | 1.017 | 84.56 | 0.98238 | 39041 P | 1.043  | 25.31 | 0.35529 | 6960  |
| Nnt           | A_52_P395228 | NM_008710    | nicotinamide nucleotide transhydrogenas    | 1.017 | 84.56 | 0.99004 | 26590 M | 1.127  | 4.63  | 0.03502 | 1344  |
| Ppp5c         | A_51_P307243 | NM_011155    | protein phosphatase 5, catalytic subunit   | 1.017 | 84.56 | 0.9788  | 38382 P | 1.008  | 42.43 | 0.89972 | 12063 |
| Tubgcp3       | A_51_P201773 | NM_198031    | tubulin, gamma complex associated prote    | 1.017 | 84.52 | 0.97543 | 38027 P | -1.027 | 47.43 | 0.6544  | 9914  |
| B2m           | A_52_P105594 | AK086184     | beta-2 microglobulin                       | 1.016 | 84.56 | 0.9824  | 39052 P | -1.191 | 19.02 | 0.38732 | 7365  |
| BC023814      | A_51_P221739 | NM_153562    | cDNA sequence BC023814                     | 1.016 | 84.56 | 0.98789 | 26469 M | 1.1    | 13.58 | 0.26812 | 5915  |
| Got2          | A_51_P175871 | NM_010325    | glutamate oxaloacetate transaminase 2, r   | 1.016 | 84.56 | 0.98078 | 38625 P | 1.133  | 6.98  | 0.05867 | 2096  |
| Gsta3         | A_51_P503625 | NM_001077353 | glutathione S-transferase, alpha 3         | 1.016 | 84.56 | 0.99678 | 40948 P | -1.179 | 8.32  | 0.19688 | 4849  |
| Hnrpa1        | A_51_P400784 | NM_001039129 | heterogeneous nuclear ribonucleoprotein    | 1.016 | 84.56 | 0.98815 | 26475 M | 1.07   | 22.1  | 0.3878  | 7370  |
| Laptm4a       | A_52_P572284 | NM_008640    | lysosomal-associated protein transmemb     | 1.016 | 84.52 | 0.98229 | 26301 M | 1.188  | 5.75  | 0.09699 | 3031  |
| Mllt7         | A_51_P200875 | NM_018789    | myeloid/lymphoid or mixed lineage-leuke    | 1.016 | 84.56 | 0.98765 | 26417 M | 1.048  | 22.1  | 0.28573 | 6162  |
| Pa2g4         | A_52_P365896 | NM_011119    | proliferation-associated 2G4               | 1.016 | 84.56 | 0.98023 | 38522 P | 1.097  | 13.58 | 0.19014 | 4725  |
| Ppp1cc        | A_52_P540434 | NM_013636    | protein phosphatase 1, catalytic subunit,  | 1.016 | 84.56 | 0.97828 | 38333 P | 1.163  | 3.82  | 0.03847 | 1460  |
| Ralgps2       | A_51_P115817 | NM_023884    | Ral GEF with PH domain and SH3 binding     | 1.016 | 84.56 | 0.98231 | 39033 P | 1.053  | 22.1  | 0.28839 | 6194  |
| Rhobtb2       | A_52_P525287 | AK122354     | Rho-related BTB domain containing 2        | 1.016 | 84.56 | 0.99149 | 40275 M | 1.09   | 9.71  | 0.09804 | 3064  |
| Sec24b        | A_52_P191537 | XM_916502    | SEC24 related gene family, member B (S.    | 1.016 | 83.95 | 0.98654 | 32221 P | 1.09   | 13.58 | 0.21205 | 5073  |
| Tbc1d17       | A_52_P655084 | NM_001042655 | TBC1 domain family, member 17              | 1.016 | 84.56 | 0.98078 | 38606 P | 1.075  | 16.2  | 0.22977 | 5347  |
| 4632411B12Rik | A_51_P262943 | NM_172652    | RIKEN cDNA 4632411B12 gene                 | 1.015 | 84.56 | 0.98815 | 39752 P | 1.001  | 42.43 | 0.99312 | 13000 |
| 4833420G17Rik | A_51_P429572 | NM_026127    | RIKEN cDNA 4833420G17 gene                 | 1.015 | 84.52 | 0.97862 | 38349 P | 1.063  | 19.02 | 0.25181 | 5673  |
| Ap3s1         | A_51_P246962 | NM_009681    | adaptor-related protein complex 3, sigma   | 1.015 | 84.52 | 0.98436 | 26367 M | 1.131  | 9.71  | 0.16966 | 4379  |
| B230117O15Rik | A_51_P365044 | AK020978     | RIKEN cDNA B230117O15 gene                 | 1.015 | 84.56 | 0.98964 | 40029 M | 1.193  | 3.82  | 0.04898 | 1819  |
| Bat1a         | A_52_P635776 | NM_019693    | HLA-B-associated transcript 1A             | 1.015 | 84.56 | 0.98123 | 38829 P | 1.106  | 9.71  | 0.1233  | 3566  |
| Cyld          | A_51_P300001 | NM_173369    | cyliindromatosis (turban tumor syndrome    | 1.015 | 84.56 | 0.9795  | 38460 P | 1.103  | 9.71  | 0.11653 | 3407  |
| Dhx38         | A_51_P169588 | NM_178380    | DEAH (Asp-Glu-Ala-His) box polypeptide 3   | 1.015 |       | 0.98413 | 29258 A | -1.027 | 45.68 | 0.51083 | 8677  |
| Fadd          | A_51_P382925 | NM_010175    | Fas (TNFRSF6)-associated via death doma    | 1.015 | 84.56 | 0.98789 | 39612 P | 1.035  | 30.75 | 0.51461 | 8717  |
| Klk5          | A_52_P108579 | NM_026806    | kallikrein related-peptidase 5             | 1.015 |       | 0.99427 | 15248 A | -1.229 | 2.53  | 0.08819 | 2851  |
| Mmp14         | A_51_P216303 | NM_008608    | matrix metallopeptidase 14 (membrane-i     | 1.015 | 84.56 | 0.98256 | 39090 P | 1.027  | 36.07 | 0.58113 | 9264  |
| Slc38a4       | A_52_P12403  | NM_027052    | solute carrier family 38, member 4         | 1.015 | 84.56 | 0.98541 | 39310 P | -1.082 | 33.49 | 0.35983 | 7011  |
| Ssr4          | A_52_P546090 | NM_009279    | signal sequence receptor, delta            | 1.015 | 84.52 | 0.98352 | 26342 M | -1.166 | 4.63  | 0.0908  | 2913  |
| Wdtd1         | A_51_P395050 | NM_199306    | WD and tetratricopeptide repeats 1         | 1.015 |       | 0.98654 | 26395 A | 1.021  | 38.4  | 0.65684 | 9944  |
| B230339M05Rik | A_51_P247098 | XM_902776    | RIKEN cDNA B230339M05 gene                 | 1.014 | 84.56 | 0.98482 | 39261 M | 1.032  | 33.49 | 0.63223 | 9740  |
| Bax           | A_51_P254541 | NM_007527    | Bcl2-associated X protein                  | 1.014 | 84.56 | 0.98815 | 39711 P | 1.142  | 4.63  | 0.03574 | 1384  |
| BC013481      | A_51_P293489 | NM_139065    | cDNA sequence BC013481                     | 1.014 | 84.56 | 0.98815 | 39736 P | 1.258  | 4.63  | 0.11507 | 3382  |
| Ddef2         | A_51_P427080 | NM_001004364 | development and differentiation enhanci    | 1.014 | 84.56 | 0.98815 | 39726 P | -1.108 | 25.31 | 0.29873 | 6301  |

|               |              |              |                                              |       |       |         |         |        |       |         |       |
|---------------|--------------|--------------|----------------------------------------------|-------|-------|---------|---------|--------|-------|---------|-------|
| Gfm1          | A_52_P311185 | AK018125     | G elongation factor, mitochondrial 1         | 1.014 | 84.56 | 0.98137 | 38836 P | 1.131  | 5.75  | 0.04629 | 1733  |
| Gtf2i         | A_52_P442585 | NM_010365    | general transcription factor II I            | 1.014 | 84.56 | 0.98256 | 39087 P | 1.096  | 11.33 | 0.13338 | 3733  |
| Mcam          | A_52_P268206 | NM_023061    | melanoma cell adhesion molecule              | 1.014 | 84.56 | 0.98906 | 39859 P | 1.114  | 16.2  | 0.34927 | 6863  |
| Nup1          | A_52_P594532 | AK129134     | nucleoporin like 1                           | 1.014 | 84.56 | 0.98123 | 38824 P | -1.086 | 11.33 | 0.08915 | 2872  |
| Pex14         | A_51_P309534 | NM_019781    | peroxisomal biogenesis factor 14             | 1.014 | 84.56 | 0.99064 | 40126 P | 1.001  | 42.43 | 0.98717 | 12951 |
| Sox12         | A_51_P322450 | NM_011438    | SRY-box containing gene 12                   | 1.014 | 84.56 | 0.9862  | 39357 P | 1.134  | 6.98  | 0.06654 | 2335  |
| Zfp364        | A_52_P292232 | NM_026406    | zinc finger protein 364                      | 1.014 | 84.56 | 0.98815 | 39753 P | 1.117  | 16.2  | 0.34405 | 6811  |
| 1300003B13Rik | A_52_P149200 | NM_198003    | RIKEN cDNA 1300003B13 gene                   | 1.013 | 84.56 | 0.98654 | 39400 P | 1.005  | 42.43 | 0.93782 | 12458 |
| 4933434I06Rik | A_51_P131164 | BC099519     | RIKEN cDNA 4933434I06 gene                   | 1.013 | 84.56 | 0.99348 | 40531 P | 1.003  | 42.43 | 0.94191 | 12499 |
| Calm1         | A_52_P224104 | NM_009790    | calmodulin 1                                 | 1.013 | 84.56 | 0.9824  | 39062 P | 1.161  | 4.63  | 0.04674 | 1740  |
| Ccar1         | A_52_P188026 | BC051052     | cell division cycle and apoptosis regulator  | 1.013 | 84.56 | 0.98815 | 39676 P | -1.022 | 48.7  | 0.70857 | 10397 |
| Cd151         | A_51_P343252 | NM_009842    | CD151 antigen                                | 1.013 | 84.56 | 0.98815 | 39713 P | 1.053  | 25.31 | 0.36387 | 7069  |
| Celsr2        | A_51_P285027 | NM_017392    | cadherin EGF LAG seven-pass G-type rece      | 1.013 | 84.56 | 0.98109 | 38749 P | 1.023  | 38.4  | 0.66248 | 9991  |
| Cnnm2         | A_51_P281586 | NM_033569    | cyclin M2                                    | 1.013 | 84.56 | 0.98815 | 39689 P | -1.032 | 45.05 | 0.49031 | 8436  |
| Csnk1a1       | A_52_P339722 | NM_146087    | casein kinase 1, alpha 1                     | 1.013 | 84.56 | 0.98149 | 38876 P | 1.228  | 3.46  | 0.06135 | 2177  |
| Ftsj3         | A_51_P449935 | NM_025310    | FtsJ homolog 3 (E. coli)                     | 1.013 | 84.56 | 0.98818 | 39755 P | 1.039  | 30.75 | 0.53803 | 8919  |
| Plekhc1       | A_51_P135832 | NM_146054    | pleckstrin homology domain containing, f     | 1.013 | 84.56 | 0.98165 | 38938 P | 1.025  | 38.4  | 0.71936 | 10488 |
| Pom121        | A_51_P191393 | NM_148932    | nuclear pore membrane protein 121            | 1.013 | 84.56 | 0.98238 | 39039 M | -1.04  | 46.3  | 0.66021 | 9974  |
| Ppp19b        | A_51_P402484 | NM_172261    | protein phosphatase 1, regulatory subuni     | 1.013 | 84.56 | 0.98815 | 39675 P | 1.175  | 4.63  | 0.04963 | 1833  |
| Psmc11        | A_52_P370353 | NM_178616    | proteasome (prosome, macropain) 26S su       | 1.013 | 84.56 | 0.98149 | 38870 P | -1.171 | 1.58  | 0.02589 | 1065  |
| Rpl14         | A_51_P232858 | NM_025974    | ribosomal protein L14                        | 1.013 | 84.56 | 0.98815 | 39694 P | 1.168  | 8.32  | 0.19727 | 4854  |
| Tpm3          | A_52_P661033 | NM_022314    | tropomyosin 3, gamma                         | 1.013 | 84.56 | 0.99004 | 26588 M | 1.364  | 2.04  | 0.05481 | 2000  |
| Ube2g2        | A_51_P248441 | NM_019803    | ubiquitin-conjugating enzyme E2G 2           | 1.013 | 84.56 | 0.98815 | 39671 P | 1.065  | 16.2  | 0.18052 | 4583  |
| 1700037H04Rik | A_51_P221641 | NM_026091    | RIKEN cDNA 1700037H04 gene                   | 1.012 | 84.56 | 0.98968 | 40037 P | 1.05   | 22.1  | 0.26817 | 5921  |
| 2500002L14Rik | A_51_P143915 | NM_025607    | RIKEN cDNA 2500002L14 gene                   | 1.012 | 84.56 | 0.98363 | 39159 P | 1.057  | 19.02 | 0.21313 | 5085  |
| Apoa5         | A_51_P259930 | NM_080434    | apolipoprotein A-V                           | 1.012 | 84.56 | 0.98482 | 32165 M | -1.048 | 43.75 | 0.47905 | 8301  |
| Arfp2         | A_51_P326425 | NM_029802    | ADP-ribosylation factor interacting protei   | 1.012 | 84.56 | 0.98765 | 39157 P | -1.021 | 47.92 | 0.62122 | 9634  |
| Emd           | A_51_P216147 | NM_007927    | emerin                                       | 1.012 | 84.56 | 0.99094 | 26610 M | 1.014  | 42.43 | 0.79549 | 11141 |
| Polr2b        | A_51_P509881 | NM_153798    | polymerase (RNA) II (DNA directed) polyp     | 1.012 | 84.56 | 0.9862  | 39355 P | -1.008 | 49.48 | 0.87731 | 11834 |
| Rab13         | A_51_P120615 | NM_001042499 | RAB, member of RAS oncogene family-like      | 1.012 | 84.56 | 0.98697 | 39469 P | 1.079  | 19.02 | 0.36876 | 7146  |
| Supt6h        | A_51_P405693 | NM_009297    | suppressor of Ty 6 homolog (S. cerevisiae)   | 1.012 | 84.56 | 0.98946 | 26566 M | 1.144  | 8.32  | 0.13843 | 3807  |
| Ush1c         | A_52_P431843 | NM_153677    | Usher syndrome 1C homolog (human)            | 1.012 | 84.56 | 0.9888  | 39808 P | -1.036 | 46.3  | 0.6394  | 9804  |
| 2610204K14Rik | A_52_P330766 | NM_025997    | RIKEN cDNA 2610204K14 gene                   | 1.011 | 84.56 | 0.98951 | 26576 M | 1.122  | 9.71  | 0.15327 | 4092  |
| 9430028L06Rik | A_52_P375970 | BC075677     | RIKEN cDNA 9430028L06 gene                   | 1.011 | 84.56 | 0.99275 | 40419 P | 1.008  | 42.43 | 0.90778 | 12171 |
| Aldh1b1       | A_51_P510418 | NM_028270    | aldehyde dehydrogenase 1 family, membe       | 1.011 | 84.56 | 0.9929  | 40472 P | 1.04   | 33.49 | 0.65619 | 9939  |
| Arfgef2       | A_52_P290725 | XM_130646    | ADP-ribosylation factor guanine nucleotic    | 1.011 | 84.56 | 0.98716 | 39489 P | -1.153 | 6.98  | 0.11794 | 3436  |
| Copb2         | A_51_P243857 | NM_015827    | coatamer protein complex, subunit beta 2     | 1.011 | 84.56 | 0.98481 | 39250 P | 1.06   | 19.02 | 0.25769 | 5780  |
| Gfpt1         | A_51_P175841 | NM_013528    | glutamine fructose-6-phosphate transam       | 1.011 | 84.56 | 0.98706 | 39478 P | 1.058  | 25.31 | 0.48248 | 8348  |
| Gtppb5        | A_51_P486906 | NM_181424    | GTP binding protein 5                        | 1.011 | 84.56 | 0.98413 | 39184 P | 1.108  | 9.71  | 0.11254 | 3325  |
| Hadha         | A_52_P193029 | NM_178878    | hydroxyacyl-Coenzyme A dehydrogenase,        | 1.011 | 84.56 | 0.98541 | 39311 P | -1.229 | 0.92  | 0.01754 | 751   |
| Mobk1b        | A_51_P168524 | NM_145571    | MOB1, Mps One Binder kinase activator-l      | 1.011 | 84.56 | 0.98815 | 39714 P | -1.094 | 33.49 | 0.44001 | 7923  |
| Rad21         | A_52_P39237  | NM_009009    | RAD21 homolog (S. pombe)                     | 1.011 | 84.56 | 0.98951 | 40008 P | 1.013  | 42.43 | 0.83975 | 11527 |
| Rest          | A_51_P348456 | NM_011263    | RE1-silencing transcription factor           | 1.011 | 84.56 | 0.98946 | 35407 P | 1.103  | 13.58 | 0.26101 | 5836  |
| Rnf14         | A_51_P145533 | NM_020012    | ring finger protein 14                       | 1.011 | 84.56 | 0.98896 | 26532 M | 1.155  | 3.82  | 0.02675 | 1092  |
| Tnni1         | A_51_P435704 | NM_021467    | troponin I, skeletal, slow 1                 | 1.011 | 84.56 | 0.98558 | 35188 M | 1.103  | 11.33 | 0.17232 | 4408  |
| Ube2v1        | A_52_P484081 | NM_023230    | ubiquitin-conjugating enzyme E2 variant 1    | 1.011 | 84.56 | 0.98976 | 40044 P | -1.058 | 36.07 | 0.25196 | 5679  |
| 2310051F07Rik | A_51_P166107 | AK075904     | RIKEN cDNA 2310051F07 gene                   | 1.01  | 84.56 | 0.99148 | 40257 P | 1.123  | 8.32  | 0.07314 | 2479  |
| Dnajb10       | A_51_P439612 | NM_020266    | Dnaj (Hsp40) homolog, subfamily B, mem       | 1.01  | 84.56 | 0.98951 | 39958 P | -1.067 | 36.07 | 0.34897 | 6861  |
| Metap1        | A_51_P102503 | NM_175224    | methionyl aminopeptidase 1                   | 1.01  | 84.56 | 0.98815 | 39632 P | 1.032  | 33.49 | 0.60547 | 9494  |
| Paip1         | A_52_P212284 | NM_145457    | polyadenylate binding protein-interacting    | 1.01  | 84.56 | 0.99401 | 40565 P | 1.145  | 3.82  | 0.02692 | 1097  |
| Slc30a6       | A_51_P512157 | NM_144798    | solute carrier family 30 (zinc transporter), | 1.01  | 84.56 | 0.98895 | 39824 P | 1.067  | 19.02 | 0.2702  | 5960  |
| Stx5a         | A_52_P309973 | NM_019829    | syntaxin 5A                                  | 1.01  | 84.56 | 0.99192 | 40322 P | 1.123  | 9.71  | 0.11387 | 3360  |
| Usp52         | A_52_P113100 | AK034635     | ubiquitin specific peptidase 52              | 1.01  | 84.56 | 0.99427 | 40630 P | 1.046  | 28.13 | 0.48168 | 8326  |

|               |              |              |                                             |       |       |         |         |        |       |         |       |
|---------------|--------------|--------------|---------------------------------------------|-------|-------|---------|---------|--------|-------|---------|-------|
| 1500011H22Rik | A_51_P252784 | NM_026883    | RIKEN cDNA 1500011H22 gene                  | 1.009 | 84.56 | 0.98765 | 39532 P | 1.05   | 25.31 | 0.35908 | 6994  |
| 2810403A07Rik | A_52_P395290 | NM_028814    | RIKEN cDNA 2810403A07 gene                  | 1.009 | 84.56 | 0.98815 | 39684 P | 1.176  | 13.58 | 0.42726 | 7792  |
| 4432406C05Rik | A_51_P435027 | NM_025708    | transmembrane protein 186                   | 1.009 | 84.56 | 0.9883  | 39761 P | 1.142  | 6.98  | 0.07798 | 2607  |
| 5730449L18Rik | A_51_P184024 | NM_025677    | RIKEN cDNA 5730449L18 gene                  | 1.009 | 84.56 | 0.98687 | 39452 P | 1.032  | 33.49 | 0.50539 | 8636  |
| Daam2         | A_52_P390241 | NM_001008231 | dishevelled associated activator of morph   | 1.009 | 84.56 | 0.98964 | 40021 P | 1.084  | 13.58 | 0.15255 | 4077  |
| Emp1          | A_52_P120037 | NM_010128    | epithelial membrane protein 1               | 1.009 | 84.56 | 0.99395 | 40554 P | 1.079  | 11.33 | 0.10313 | 3175  |
| Erg           | A_52_P499821 | AK078113     | avian erythroblastosis virus E-26 (v-ets) o | 1.009 | 84.56 | 0.99151 | 40283 P | 1.03   | 30.75 | 0.48471 | 8382  |
| Glb1          | A_52_P659925 | NM_009752    | galactosidase, beta 1                       | 1.009 | 84.56 | 0.98951 | 40007 P | -1.025 | 47.92 | 0.64455 | 9841  |
| Hspb2         | A_51_P322138 | NM_024441    | heat shock protein 2                        | 1.009 | 84.56 | 0.98793 | 39621 P | -1.052 | 38.4  | 0.27516 | 6027  |
| Map2k5        | A_52_P279319 | NM_011840    | mitogen activated protein kinase kinase 5   | 1.009 | 84.56 | 0.99054 | 40109 P | 1.034  | 30.75 | 0.49233 | 8471  |
| Pax2          | A_51_P375526 | NM_011037    | paired box gene 2                           | 1.009 | 84.56 | 0.98895 | 39823 P | -1.043 | 42.43 | 0.33167 | 6698  |
| Ralb          | A_52_P253004 | NM_022327    | v-ral simian leukemia viral oncogene hom    | 1.009 | 84.56 | 0.99017 | 26594 M | -1.016 | 49.48 | 0.73988 | 10685 |
| Taf6l         | A_52_P231658 | NM_146092    | TAF6-like RNA polymerase II, p300/CBP-a     | 1.009 | 84.56 | 0.98951 | 39950 P | -1.101 | 11.33 | 0.10562 | 3204  |
| Thrap2        | A_52_P352024 | AK088795     | thyroid hormone receptor associated pro     | 1.009 | 84.56 | 0.99151 | 40282 P | 1.064  | 19.02 | 0.30472 | 6382  |
| Ube1c         | A_51_P341978 | NM_011666    | ubiquitin-activating enzyme E1C             | 1.009 | 84.56 | 0.98993 | 40047 P | 1.123  | 9.71  | 0.16167 | 4249  |
| 9130011J15Rik | A_51_P414529 | NM_172396    | RIKEN cDNA 9130011J15 gene                  | 1.008 | 84.56 | 0.99102 | 26617 M | -1.056 | 43.15 | 0.50004 | 8579  |
| Arfrp1        | A_52_P153497 | NM_029702    | ADP-ribosylation factor related protein 1   | 1.008 | 84.56 | 0.99148 | 40259 P | -1.067 | 38.4  | 0.37807 | 7255  |
| Crat          | A_51_P440807 | NM_007760    | carnitine acetyltransferase                 | 1.008 | 84.56 | 0.991   | 40167 P | -1.045 | 43.15 | 0.39163 | 7414  |
| Dnajc10       | A_52_P63336  | NM_024181    | Dnaj (Hsp40) homolog, subfamily C, mem      | 1.008 | 84.56 | 0.99288 | 40445 P | 1.173  | 5.75  | 0.08375 | 2747  |
| Dnajc9        | A_52_P446171 | NM_134081    | Dnaj (Hsp40) homolog, subfamily C, mem      | 1.008 | 84.56 | 0.99106 | 40188 P | -1.078 | 22.1  | 0.14687 | 3980  |
| Fxc1          | A_52_P464268 | NM_019502    | fractured callus expressed transcript 1     | 1.008 | 84.56 | 0.98789 | 39613 P | 1.166  | 4.63  | 0.05886 | 2100  |
| Ina           | A_52_P366860 | NM_146100    | internexin neuronal intermediate filamen    | 1.008 | 84.56 | 0.99054 | 40108 P | -1.064 | 33.49 | 0.24299 | 5540  |
| Lrrc1         | A_52_P189977 | NM_172528    | leucine rich repeat containing 1            | 1.008 | 84.56 | 0.9925  | 40359 P | 1.107  | 9.71  | 0.10534 | 3201  |
| Nr2f6         | A_51_P184353 | NM_010150    | nuclear receptor subfamily 2, group F, me   | 1.008 | 84.56 | 0.99192 | 26653 M | 1.215  | 2.53  | 0.01985 | 844   |
| Ppp2r2d       | A_51_P497061 | NM_026391    | protein phosphatase 2, regulatory subuni    | 1.008 | 84.56 | 0.98951 | 40002 P | -1.228 | 0.56  | 0.01017 | 382   |
| Rabgta        | A_51_P481832 | NM_019519    | Rab geranylgeranyl transferase, a subunit   | 1.008 | 84.56 | 0.99141 | 40208 P | 1.029  | 33.49 | 0.57198 | 9207  |
| Srp72         | A_51_P165770 | NM_025691    | signal recognition particle 72              | 1.008 | 84.56 | 0.99141 | 40217 P | 1.057  | 19.02 | 0.22218 | 5239  |
| St7l          | A_52_P198916 | NM_153091    | suppression of tumorigenicity 7-like        | 1.008 | 84.56 | 0.98951 | 39938 P | 1.003  | 42.43 | 0.96749 | 12722 |
| 1110002L01Rik | A_52_P60773  | AK035515     | RIKEN cDNA 1110002L01 gene                  | 1.007 | 84.56 | 0.99004 | 40065 P | 1.192  | 3.01  | 0.02803 | 1136  |
| 1110004F10Rik | A_51_P287030 | NM_019772    | RIKEN cDNA 1110004F10 gene                  | 1.007 | 84.56 | 0.99427 | 40608 P | 1.1    | 16.2  | 0.36141 | 7033  |
| Adk           | A_51_P130666 | NM_134079    | adenosine kinase                            | 1.007 | 84.56 | 0.99347 | 26685 M | 1.123  | 4.63  | 0.03904 | 1471  |
| Cdk9          | A_51_P190667 | NM_130860    | cyclin-dependent kinase 9 (CDC2-related     | 1.007 | 84.56 | 0.98951 | 39985 P | 1.048  | 25.31 | 0.37353 | 7212  |
| D5Ert585e     | A_51_P179953 | NM_027922    | DNA segment, Chr 5, ERATO Doi 585, exp      | 1.007 | 84.56 | 0.99148 | 40252 P | -1.179 | 1.62  | 0.03537 | 1370  |
| Eif4ebp2      | A_51_P135654 | NM_010124    | eukaryotic translation initiation factor 4E | 1.007 | 84.56 | 0.99106 | 40194 P | 1.018  | 40.63 | 0.74137 | 10697 |
| Gabpb2        | A_51_P455694 | NM_172512    | GA repeat binding protein, beta 2           | 1.007 | 83.95 | 0.99427 | 29535 M | -1.003 | 49.48 | 0.97713 | 12815 |
| Hba-x         | A_51_P204053 | NM_010405    | hemoglobin X, alpha-like embryonic chain    | 1.007 |       | 0.99405 | 23306 A | 1.075  | 16.2  | 0.26561 | 5888  |
| Hbs1l         | A_52_P530979 | BC085235     | Hbs1-like (S. cerevisiae)                   | 1.007 | 84.56 | 0.99214 | 40349 M | -1.009 | 49.48 | 0.93013 | 12389 |
| Hectd1        | A_52_P421728 | XM_974905    | HECT domain containing 1                    | 1.007 | 84.56 | 0.99138 | 40206 P | 1.166  | 6.98  | 0.09335 | 2973  |
| Invs          | A_52_P333117 | AK020257     | inversin                                    | 1.007 |       | 0.99532 | 19880 A | -1.044 | 43.75 | 0.47546 | 8265  |
| Mrpl44        | A_52_P668030 | AK156814     | mitochondrial ribosomal protein L44         | 1.007 | 84.56 | 0.99428 | 40684 P | 1.235  | 1.62  | 0.01603 | 691   |
| Scarf2        | A_51_P294402 | NM_153790    | scavenger receptor class F, member 2        | 1.007 | 84.56 | 0.98964 | 40033 P | 1.053  | 22.1  | 0.31989 | 6566  |
| Slc25a22      | A_51_P447329 | NM_026646    | solute carrier family 25 (mitochondrial ca  | 1.007 | 84.56 | 0.99155 | 40290 P | -1.026 | 47.92 | 0.68107 | 10147 |
| Slc9a1        | A_52_P466081 | NM_016981    | solute carrier family 9 (sodium/hydrogen    | 1.007 | 84.56 | 0.99532 | 40791 P | 1.027  | 33.49 | 0.56462 | 9159  |
| Tnrc5         | A_51_P498403 | NM_028065    | trinucleotide repeat containing 5           | 1.007 | 84.56 | 0.99146 | 40221 P | 1.027  | 33.49 | 0.52476 | 8794  |
| 5033414D02Rik | A_51_P351238 | NM_026362    | RIKEN cDNA 5033414D02 gene                  | 1.006 | 84.56 | 0.99275 | 40404 P | 1.067  | 16.2  | 0.20349 | 4948  |
| 5730470L24Rik | A_51_P145300 | AK012679     | RIKEN cDNA 5730470L24 gene                  | 1.006 | 84.56 | 0.99538 | 40810 P | -1.123 | 4.63  | 0.05148 | 1893  |
| BC053440      | A_51_P489086 | XM_134209    | cDNA sequence BC053440                      | 1.006 | 84.56 | 0.99192 | 40315 P | 1.185  | 8.32  | 0.21889 | 5186  |
| Cdh5          | A_51_P309056 | NM_009868    | cadherin 5                                  | 1.006 | 84.56 | 0.99532 | 40769 P | -1.025 | 48.7  | 0.74287 | 10717 |
| Cdk2ap1       | A_51_P411007 | NM_013812    | CDK2 (cyclin-dependent kinase 2)-associa    | 1.006 | 84.56 | 0.99268 | 40387 P | 1.061  | 19.02 | 0.27485 | 6024  |
| Cox5a         | A_51_P335900 | NM_007747    | cytochrome c oxidase, subunit Va            | 1.006 | 84.56 | 0.99147 | 40244 P | 1.002  | 42.43 | 0.98495 | 12925 |
| D10Bwg1364e   | A_51_P401717 | NM_145421    | DNA segment, Chr 10, Brigham & Womer        | 1.006 | 84.56 | 0.99146 | 40233 P | -1.161 | 4.63  | 0.09166 | 2933  |
| Iqgap1        | A_52_P630828 | NM_016721    | IQ motif containing GTPase activating pro   | 1.006 | 84.56 | 0.99389 | 40550 P | 1.312  | 1.32  | 0.01962 | 838   |
| Ly6e          | A_51_P148814 | NM_008529    | lymphocyte antigen 6 complex, locus E       | 1.006 | 84.56 | 0.99401 | 29530 M | 1.038  | 30.75 | 0.50642 | 8644  |

|               |               |              |                                             |       |       |         |         |        |       |         |       |
|---------------|---------------|--------------|---------------------------------------------|-------|-------|---------|---------|--------|-------|---------|-------|
| Oncut2        | A_52_P1164839 | NM_194268    | one cut domain, family member 2             | 1.006 | 84.56 | 0.99427 | 40605 P | -1.194 | 5.75  | 0.16545 | 4300  |
| Prpf31        | A_51_P340704  | NM_027328    | PRP31 pre-mRNA processing factor 31 ho      | 1.006 | 84.56 | 0.99286 | 40434 P | 1.065  | 16.2  | 0.19032 | 4732  |
| Snx26         | A_52_P524761  | NM_178252    | sorting nexin 26                            | 1.006 | 84.56 | 0.99106 | 40183 M | -1.331 | 0.51  | 0.00645 | 180   |
| Ssb           | A_51_P119055  | NM_009278    | Sjogren syndrome antigen B                  | 1.006 | 84.56 | 0.99192 | 40337 P | 1.093  | 13.58 | 0.17626 | 4503  |
| Timp3         | A_51_P463765  | NM_011595    | tissue inhibitor of metalloproteinase 3     | 1.006 | 84.56 | 0.99612 | 26735 M | -1.078 | 25.31 | 0.19126 | 4752  |
| Trip6         | A_51_P121058  | NM_011639    | thyroid hormone receptor interactor 6       | 1.006 | 84.56 | 0.99395 | 40553 P | 1.049  | 22.1  | 0.28597 | 6170  |
| U2af1         | A_51_P364786  | NM_024187    | U2 small nuclear ribonucleoprotein auxili   | 1.006 | 84.56 | 0.99401 | 40561 P | 1.06   | 19.02 | 0.25587 | 5741  |
| Znrf1         | A_52_P312116  | AK078819     | zinc and ring finger 1                      | 1.006 | 84.56 | 0.99427 | 40618 P | -1.098 | 13.58 | 0.11208 | 3320  |
| BC030336      | A_52_P655948  | AK148546     | cDNA sequence BC030336                      | 1.005 | 84.56 | 0.99155 | 40295 P | 1.029  | 36.07 | 0.60929 | 9518  |
| Lrsam1        | A_52_P112139  | NM_199302    | leucine rich repeat and sterile alpha moti  | 1.005 | 84.56 | 0.99466 | 40723 P | 1.013  | 42.43 | 0.7879  | 11072 |
| Lsm6          | A_52_P422755  | NM_030145    | LSM6 homolog, U6 small nuclear RNA ass      | 1.005 | 84.56 | 0.99275 | 40414 P | 1.035  | 36.07 | 0.72886 | 10563 |
| Nap14         | A_52_P634822  | NM_008672    | nucleosome assembly protein 1-like 4        | 1.005 | 84.56 | 0.99428 | 40660 P | 1.049  | 25.31 | 0.36196 | 7045  |
| Ncoa1         | A_51_P502888  | NM_010881    | nuclear receptor coactivator 1              | 1.005 | 84.56 | 0.99268 | 40384 P | 1.032  | 33.49 | 0.57623 | 9238  |
| Npc1          | A_52_P410979  | AK170880     | Niemann Pick type C1                        | 1.005 | 75.14 | 0.99614 | 26732 M | 1.063  | 22.1  | 0.31612 | 6537  |
| Pros1         | A_51_P393426  | NM_011173    | protein S (alpha)                           | 1.005 | 84.56 | 0.99401 | 40576 P | 1.099  | 22.1  | 0.52827 | 8823  |
| Pttg1ip       | A_51_P173100  | NM_145925    | pituitary tumor-transforming 1 interactin   | 1.005 | 84.56 | 0.99427 | 40646 P | 1.036  | 28.13 | 0.41501 | 7681  |
| Rhot2         | A_52_P535346  | NM_145999    | ras homolog gene family, member T2          | 1.005 | 84.56 | 0.99457 | 40715 P | -1.402 | 0     | 0.00584 | 24    |
| Surb7         | A_51_P396708  | NM_025315    | SRB7 (suppressor of RNA polymerase B) h     | 1.005 | 84.56 | 0.99678 | 40953 P | 1.029  | 33.49 | 0.52263 | 8773  |
| Yars          | A_51_P248674  | NM_134151    | tyrosyl-tRNA synthetase                     | 1.005 | 84.56 | 0.99288 | 40443 P | 1.011  | 42.43 | 0.80573 | 11228 |
| 4933404O12Rik | A_51_P257122  | AK016656     | RIKEN cDNA 4933404O12 gene                  | 1.004 | 75.14 | 0.99532 | 29547 M | 1.029  | 33.49 | 0.56159 | 9128  |
| Adck2         | A_52_P222967  | NM_178873    | aarF domain containing kinase 2             | 1.004 | 84.56 | 0.99635 | 40919 P | 1.186  | 5.75  | 0.08313 | 2731  |
| Fdft1         | A_51_P485946  | NM_010191    | farnesyl diphosphate farnesyl transferase   | 1.004 | 84.56 | 0.99554 | 40821 P | -1.117 | 28.13 | 0.38669 | 7355  |
| Gsn           | A_51_P241465  | NM_146120    | gelsolin                                    | 1.004 | 84.56 | 0.99532 | 40766 P | 1.142  | 9.71  | 0.22646 | 5296  |
| Lcn2          | A_51_P510156  | NM_008491    | lipocalin 2                                 | 1.004 | 84.56 | 0.99748 | 41024 P | -1.087 | 28.13 | 0.27428 | 6019  |
| Ppm1a         | A_51_P335303  | NM_008910    | protein phosphatase 1A, magnesium dep       | 1.004 | 84.56 | 0.99614 | 40896 P | 1.128  | 8.32  | 0.09477 | 2995  |
| Ptchd1        | A_51_P375771  | XM_142262    | patched domain containing 1                 | 1.004 | 84.56 | 0.99686 | 40986 P | 1.038  | 36.07 | 0.75256 | 10808 |
| Rab9          | A_52_P214678  | NM_019773    | RAB9, member RAS oncogene family            | 1.004 | 84.56 | 0.99608 | 40882 P | -1.025 | 48.7  | 0.72866 | 10558 |
| Retn          | A_52_P55972   | NM_022984    | resistin                                    | 1.004 |       | 0.99836 | 15316 A | 1.075  | 16.2  | 0.22643 | 5294  |
| Sh2d3c        | A_51_P464761  | NM_013781    | SH2 domain containing 3C                    | 1.004 | 84.56 | 0.99686 | 40971 P | 1.051  | 22.1  | 0.27618 | 6047  |
| Tmc6          | A_52_P119972  | NM_181321    | transmembrane channel-like gene family      | 1.004 | 79.26 | 0.99614 | 29560 M | 1.008  | 42.43 | 0.91419 | 12212 |
| Tmem19        | A_51_P392090  | NM_133683    | transmembrane protein 19                    | 1.004 | 84.56 | 0.99348 | 40532 P | 1.041  | 28.13 | 0.43181 | 7856  |
| Usp42         | A_51_P199057  | NM_029749    | ubiquitin specific peptidase 42             | 1.004 | 84.56 | 0.99614 | 40899 P | 1.025  | 38.4  | 0.72417 | 10517 |
| Arf3          | A_51_P200068  | NM_007478    | ADP-ribosylation factor 3                   | 1.003 | 84.56 | 0.99705 | 26754 M | 1.116  | 8.32  | 0.08291 | 2723  |
| C78339        | A_51_P155550  | AK090371     | expressed sequence C78339                   | 1.003 | 84.56 | 0.99428 | 40688 P | 1.117  | 8.32  | 0.0711  | 2416  |
| C79407        | A_51_P294346  | AK035117     | expressed sequence C79407                   | 1.003 | 84.56 | 0.99648 | 40935 P | -1.063 | 40.63 | 0.41596 | 7695  |
| Cln3          | A_52_P130982  | BC047120     | ceroid lipofuscinosis, neuronal 3, juvenile | 1.003 | 84.56 | 0.99532 | 40802 P | 1.152  | 4.63  | 0.04968 | 1842  |
| Espn          | A_52_P469345  | NM_207687    | espin                                       | 1.003 | 84.56 | 0.99606 | 40873 P | 1.02   | 38.4  | 0.70731 | 10387 |
| Foxd4         | A_51_P443584  | NM_008022    | forkhead box D4                             | 1.003 |       | 0.99864 | 15323 A | 1.035  | 28.13 | 0.41191 | 7635  |
| Irs3          | A_51_P174158  | NM_010571    | insulin receptor substrate 3                | 1.003 |       | 0.99686 | 26747 A | -1.027 | 48.39 | 0.74264 | 10712 |
| Lypla1        | A_52_P8227    | NM_008866    | lysophospholipase 1                         | 1.003 | 84.56 | 0.99614 | 40887 P | 1.13   | 6.98  | 0.06328 | 2239  |
| Nfkb2         | A_51_P454217  | NM_019408    | nuclear factor of kappa light polypeptide   | 1.003 | 84.56 | 0.99614 | 40894 P | 1.091  | 9.71  | 0.08963 | 2880  |
| Ppfia1        | A_51_P424603  | AK037102     | protein tyrosine phosphatase, receptor ty   | 1.003 | 84.22 | 0.99857 | 26779 M | 1.136  | 9.71  | 0.18854 | 4704  |
| Pqlc1         | A_52_P96939   | AK019858     | PQ loop repeat containing 1                 | 1.003 |       | 0.99785 | 23354 A | 1.03   | 33.49 | 0.53852 | 8923  |
| Rad17         | A_51_P464633  | NM_011233    | RAD17 homolog (S. pombe)                    | 1.003 | 84.56 | 0.9975  | 41055 P | 1.133  | 6.98  | 0.06787 | 2359  |
| Safb2         | A_51_P332559  | NM_001029979 | scaffold attachment factor B2               | 1.003 | 84.56 | 0.99686 | 40970 P | -1.173 | 2.53  | 0.05055 | 1868  |
| Ube2j2        | A_51_P416919  | NM_021402    | ubiquitin-conjugating enzyme E2, J2 hom     | 1.003 | 84.56 | 0.99555 | 40824 P | 1.066  | 19.02 | 0.30199 | 6340  |
| A630051L19Rik | A_52_P685821  | AK042002     | RIKEN cDNA D730040F13 gene                  | 1.002 | 84.56 | 0.99735 | 41013 P | 1.04   | 30.75 | 0.49804 | 8558  |
| Armcx2        | A_51_P356512  | NM_026139    | armadillo repeat containing, X-linked 2     | 1.002 | 84.56 | 0.99686 | 40990 P | 1.358  | 1.32  | 0.02595 | 1070  |
| C130032J12Rik | A_51_P328645  | NM_178684    | RIKEN cDNA C130032J12 gene                  | 1.002 | 84.56 | 0.99783 | 41108 P | 1.179  | 3.82  | 0.03602 | 1396  |
| Cct6b         | A_51_P392040  | NM_009839    | chaperonin subunit 6b (zeta)                | 1.002 | 84.56 | 0.99748 | 41035 P | -1.292 | 0.51  | 0.01203 | 486   |
| Cradd         | A_51_P242265  | NM_009950    | CASP2 and RIPK1 domain containing adap      | 1.002 | 84.56 | 0.99857 | 41216 P | 1.078  | 13.58 | 0.17711 | 4518  |
| Mbl1          | A_51_P373619  | NM_010775    | mannose binding lectin (A)                  | 1.002 | 83.36 | 0.99685 | 35648 M | 1.063  | 25.31 | 0.44217 | 7938  |
| Nid1          | A_51_P339943  | NM_010917    | nidogen 1                                   | 1.002 | 84.56 | 0.99785 | 26769 M | -1.048 | 43.15 | 0.461   | 8117  |



|               |              |              |                                              |        |       |         |         |        |       |         |       |
|---------------|--------------|--------------|----------------------------------------------|--------|-------|---------|---------|--------|-------|---------|-------|
| Nudcd3        | A_52_P105164 | NM_173748    | NudC domain containing 3                     | 1.002  | 84.56 | 0.99752 | 41074 P | 1.081  | 11.33 | 0.12642 | 3641  |
| Olig2         | A_51_P367451 | NM_016967    | oligodendrocyte transcription factor 2       | 1.002  |       | 0.9993  | 15330 A | 1.179  | 2.04  | 0.01467 | 626   |
| Pnp           | A_51_P488888 | NM_013632    | purine-nucleoside phosphorylase              | 1.002  | 84.56 | 0.9986  | 41242 P | -1.023 | 47.43 | 0.59887 | 9438  |
| Sulf1         | A_51_P142744 | NM_172294    | sulfatase 1                                  | 1.002  | 84.56 | 0.99857 | 41224 P | 1.057  | 22.1  | 0.3306  | 6680  |
| 1600002K03Rik | A_51_P519570 | NM_027207    | RIKEN cDNA 1600002K03 gene                   | 1.001  | 84.56 | 0.99912 | 41287 P | 1.195  | 5.75  | 0.1174  | 3426  |
| Btbd1         | A_51_P242345 | NM_146193    | BTB (POZ) domain containing 1                | 1.001  | 84.56 | 0.99785 | 41151 P | -1.025 | 46.3  | 0.5433  | 8973  |
| Cald1         | A_51_P357573 | NM_145575    | caldesmon 1                                  | 1.001  | 84.56 | 0.99843 | 41198 P | -1.098 | 36.07 | 0.49986 | 8577  |
| Dstn          | A_51_P459350 | NM_019771    | destrin                                      | 1.001  | 84.56 | 0.99903 | 41271 P | -1.429 | 0.51  | 0.00584 | 40    |
| Dyrk1a        | A_52_P225969 | AK047845     | dual-specificity tyrosine-(Y)-phosphorylat   | 1.001  | 84.56 | 0.9984  | 41175 P | 1.205  | 3.46  | 0.04727 | 1766  |
| Erc3          | A_51_P366024 | NM_133658    | excision repair cross-complementing rod      | 1.001  | 84.56 | 0.99785 | 41144 P | 1.074  | 19.02 | 0.29109 | 6221  |
| Gpam          | A_52_P11388  | NM_008149    | glycerol-3-phosphate acyltransferase, mit    | 1.001  |       | 0.99887 | 26786 A | -1.376 | 0.51  | 0.00584 | 93    |
| Gpr27         | A_51_P260167 | NM_008158    | G protein-coupled receptor 27                | 1.001  | 84.56 | 0.99785 | 41129 P | 1.058  | 22.1  | 0.31081 | 6465  |
| Hmgn2         | A_52_P149864 | NM_016957    | high mobility group nucleosomal binding      | 1.001  | 84.56 | 0.99871 | 26782 M | -1.066 | 28.13 | 0.19298 | 4792  |
| Purb          | A_51_P468381 | NM_011221    | purine rich element binding protein B        | 1.001  | 84.56 | 0.9988  | 41246 P | -1.059 | 38.4  | 0.35592 | 6964  |
| Rnpepl1       | A_51_P220407 | NM_181405    | arginyl aminopeptidase (aminopeptidase       | 1.001  | 84.56 | 0.99944 | 41292 P | -1.013 | 49.8  | 0.86156 | 11690 |
| 6330407G11Rik | A_51_P237575 | NM_023423    | RIKEN cDNA 6330407G11 gene                   | 1      | 83.95 | 0.99959 | 41331 P | 1.199  | 4.63  | 0.07156 | 2425  |
| Arfgap3       | A_52_P439874 | AK018680     | ADP-ribosylation factor GTPase activating    | 1      | 83.95 | 0.99966 | 41334 P | 1.002  | 42.43 | 0.96617 | 12713 |
| Becn1         | A_51_P489337 | NM_019584    | beclin 1 (coiled-coil, myosin-like BCL2-inte | 1      | 83.95 | 0.99994 | 41355 P | 1.053  | 22.1  | 0.31627 | 6544  |
| Id1           | A_51_P385786 | NM_010495    | inhibitor of DNA binding 1                   | 1      | 82.34 | 0.99994 | 32647 P | 1.035  | 38.4  | 0.776   | 10959 |
| Idh2          | A_51_P331507 | NM_173011    | isocitrate dehydrogenase 2 (NADP+), mito     | 1      | 83.95 | 0.99972 | 41326 P | 1.029  | 36.07 | 0.64171 | 9816  |
| Map4k5        | A_52_P57057  | AK052373     | mitogen-activated protein kinase kinase k    | 1      | 83.95 | 0.99994 | 41352 P | 1.174  | 3.82  | 0.04432 | 1654  |
| Mcm5          | A_51_P190111 | NM_008566    | minichromosome maintenance deficient         | 1      | 84.56 | 0.99994 | 41375 P | -1.08  | 25.31 | 0.18213 | 4611  |
| Pdcl          | A_52_P670909 | NM_026176    | phosducin-like                               | 1      | 84.56 | 0.99992 | 41370 P | -1.123 | 6.98  | 0.07542 | 2546  |
| Rbm16         | A_51_P143576 | AK054357     | RNA binding motif protein 16                 | 1      | 84.56 | 0.99972 | 41299 P | 1.013  | 42.43 | 0.80422 | 11211 |
| Rbms2         | A_52_P49096  | NM_001039080 | RNA binding motif, single stranded intera    | 1      | 83.95 | 0.99944 | 41307 P | -1.02  | 49.39 | 0.74646 | 10757 |
| Rchy1         | A_51_P374305 | NM_026557    | ring finger and CHY zinc finger domain co    | 1      | 84.56 | 0.99994 | 41369 P | 1.113  | 8.32  | 0.07272 | 2461  |
| Rpn1          | A_52_P656634 | NM_133933    | ribophorin I                                 | 1      | 84.56 | 0.99994 | 41393 M | 1.097  | 13.58 | 0.19113 | 4750  |
| Slc7a8        | A_51_P112734 | NM_016972    | solute carrier family 7 (cationic amino aci  | 1      | 83.95 | 0.99994 | 26796 M | 1.105  | 13.58 | 0.24916 | 5633  |
| Smad2         | A_52_P397280 | NM_010754    | MAD homolog 2 (Drosophila)                   | 1      | 83.95 | 0.99994 | 41396 P | 1.104  | 13.58 | 0.20422 | 4955  |
| Snx11         | A_52_P253557 | AK037747     | sorting nexin 11                             | 1      | 84.56 | 0.99994 | 41346 P | 1.068  | 19.02 | 0.29228 | 6239  |
| Taz           | A_51_P107282 | NM_181516    | tafazzin                                     | 1      | 84.56 | 0.99983 | 41337 P | 1.03   | 33.49 | 0.53987 | 8943  |
| Tusc3         | A_52_P515347 | NM_030254    | tumor suppressor candidate 3                 | 1      | 84.56 | 0.99994 | 26795 M | 1.035  | 33.49 | 0.6577  | 9950  |
| Zfp260        | A_52_P649721 | NM_011981    | zinc finger protein 260                      | 1      | 84.56 | 0.99994 | 41345 P | -1.11  | 13.58 | 0.13916 | 3834  |
| Zw10          | A_51_P137007 | NM_012039    | ZW10 homolog (Drosophila), centromere        | 1      | 84.56 | 0.99992 | 41400 P | 1.024  | 33.49 | 0.56342 | 9138  |
| 4933417E01Rik | A_51_P449824 | NM_028954    | RIKEN cDNA 4933417E01 gene                   | -1.001 | 83.95 | 0.9984  | 41191 P | -1.006 | 49.48 | 0.90099 | 12102 |
| Fahd1         | A_51_P389421 | NM_023480    | fumarylacetoacetate hydrolase domain co      | -1.001 | 83.95 | 0.99947 | 41309 P | 1.032  | 30.75 | 0.50522 | 8634  |
| Fstl3         | A_52_P14851  | NM_031380    | folliculin-like 3                            | -1.001 | 83.95 | 0.9991  | 41291 P | 1.005  | 42.43 | 0.93483 | 12429 |
| G6pc3         | A_51_P430555 | NM_175935    | glucose 6 phosphatase, catalytic, 3          | -1.001 | 83.95 | 0.9991  | 41266 P | -1.04  | 43.15 | 0.38401 | 7329  |
| Wdr48         | A_52_P467046 | NM_026236    | WD repeat domain 48                          | -1.001 | 83.95 | 0.9993  | 41283 P | -1.015 | 49.48 | 0.74425 | 10746 |
| Actn4         | A_51_P394788 | NM_021895    | actinin alpha 4                              | -1.002 | 83.95 | 0.99857 | 26777 M | -1.193 | 1.1   | 0.01603 | 690   |
| Arpc5l        | A_51_P180108 | NM_028809    | actin related protein 2/3 complex, subuni    | -1.002 | 83.95 | 0.99645 | 40936 P | 1.077  | 16.2  | 0.24444 | 5567  |
| Ccndbp1       | A_51_P154469 | NM_010761    | cyclin D-type binding-protein 1              | -1.002 | 83.95 | 0.9981  | 26771 M | 1.183  | 3.82  | 0.03732 | 1423  |
| Elovl1        | A_51_P120305 | NM_001039176 | elongation of very long chain fatty acids (  | -1.002 | 83.95 | 0.99614 | 40904 P | 1.094  | 13.58 | 0.17257 | 4418  |
| Gdf5          | A_51_P415675 | NM_008109    | growth differentiation factor 5              | -1.002 | 83.95 | 0.99752 | 41072 M | 1.008  | 42.43 | 0.89707 | 12031 |
| Notch2        | A_51_P216397 | NM_010928    | Notch gene homolog 2 (Drosophila)            | -1.002 | 84.4  | 0.99783 | 32623 M | -1.066 | 28.13 | 0.1884  | 4702  |
| Rfxank        | A_52_P484838 | NM_011266    | regulatory factor X-associated ankyrin-co    | -1.002 | 83.95 | 0.9975  | 41046 P | -1.018 | 49.39 | 0.7247  | 10519 |
| Rnh1          | A_51_P463497 | NM_145135    | ribonuclease/angiogenin inhibitor 1          | -1.002 | 83.95 | 0.99785 | 41149 P | 1.033  | 33.49 | 0.5705  | 9197  |
| Zfyve21       | A_51_P396917 | NM_026752    | zinc finger, FYVE domain containing 21       | -1.002 | 83.95 | 0.99827 | 41163 P | -1.223 | 1.32  | 0.0391  | 1477  |
| Mcm2          | A_51_P158210 | NM_008564    | minichromosome maintenance deficient         | -1.003 | 83.95 | 0.99785 | 41139 P | -1.032 | 46.3  | 0.68212 | 9360  |
| Nars          | A_51_P315555 | NM_027350    | asparaginyl-tRNA synthetase                  | -1.003 | 83.95 | 0.99718 | 41004 P | 1.072  | 19.02 | 0.263   | 5852  |
| Pfdn4         | A_51_P423791 | NM_001013369 | prefoldin 4                                  | -1.003 | 83.95 | 0.99614 | 40897 P | 1.078  | 16.2  | 0.25423 | 5728  |
| Tmed3         | A_51_P284244 | NM_025360    | transmembrane emp24 domain containin         | -1.003 | 83.95 | 0.99783 | 26766 M | 1.031  | 36.07 | 0.71608 | 10455 |
| Arrdc2        | A_51_P417651 | NM_027560    | arrestin domain containing 2                 | -1.004 | 83.36 | 0.99348 | 40499 P | 1.017  | 38.4  | 0.69931 | 10310 |

|               |              |                    |                                               |        |       |         |         |        |       |         |       |
|---------------|--------------|--------------------|-----------------------------------------------|--------|-------|---------|---------|--------|-------|---------|-------|
| BC057552      | A_52_P412543 | NM_172502          | cDNA sequence BC057552                        | -1.004 | 83.95 | 0.99532 | 40798 P | -1.357 | 0.51  | 0.00584 | 95    |
| H2afx         | A_51_P245275 | NM_010436          | H2A histone family, member X                  | -1.004 | 83.95 | 0.99428 | 40694 P | -1.237 | 0.51  | 0.00877 | 320   |
| Homer3        | A_51_P466613 | NM_011984          | homer homolog 3 (Drosophila)                  | -1.004 | 83.95 | 0.99718 | 41006 P | -1.006 | 49.48 | 0.90778 | 12172 |
| Irf2bp1       | A_52_P381953 | NM_178757          | interferon regulatory factor 2 binding pro    | -1.004 | 83.95 | 0.99686 | 40982 P | 1.157  | 9.71  | 0.21223 | 5077  |
| Kpna1         | A_51_P256682 | NM_008465          | karyopherin (importin) alpha 1                | -1.004 | 83.36 | 0.99427 | 40606 P | 1.036  | 36.07 | 0.7313  | 10580 |
| Mfhas1        | A_51_P494825 | BC082308           | malignant fibrous histiocytoma amplified      | -1.004 | 83.36 | 0.9938  | 40542 P | 1.111  | 16.2  | 0.34387 | 6808  |
| Pdgfrb        | A_51_P150964 | NM_008809          | platelet derived growth factor receptor, b    | -1.004 | 83.95 | 0.99532 | 40775 P | 1.019  | 38.4  | 0.6685  | 10029 |
| Cldn13        | A_51_P469568 | NM_020504          | claudin 13                                    | -1.005 |       | 0.99566 | 23331 A | -1.05  | 44.4  | 0.59052 | 9335  |
| Eif3s4        | A_51_P489229 | NM_016876          | eukaryotic translation initiation factor 3, s | -1.005 | 83.95 | 0.99532 | 40774 P | 1.026  | 38.4  | 0.69769 | 10301 |
| Hsd11b2       | A_51_P410205 | NM_008289          | hydroxysteroid 11-beta dehydrogenase 2        | -1.005 | 81.02 | 0.9929  | 35544 M | -1.017 | 49.48 | 0.81394 | 11319 |
| 0610010K06Rik | A_51_P288522 | NM_027861          | RIKEN cDNA 0610010K06 gene                    | -1.006 | 83.36 | 0.99149 | 40269 P | 1.142  | 4.63  | 0.03815 | 1450  |
| BC002230      | A_51_P213592 | XM_484171          | cDNA sequence BC002230                        | -1.006 | 83.36 | 0.99348 | 40521 P | -1.001 | 49.48 | 0.98929 | 12980 |
| Fkbp1         | A_51_P515452 | NM_019873          | FK506 binding protein-like                    | -1.006 | 83.95 | 0.9944  | 40710 P | 1.067  | 13.58 | 0.15856 | 4191  |
| Foxp3         | A_51_P401096 | NM_054039          | forkhead box P3                               | -1.006 | 83.36 | 0.99395 | 40555 M | 1.08   | 13.58 | 0.17322 | 4427  |
| Gimap6        | A_51_P407227 | NM_153175          | GTPase, IMAP family member 6                  | -1.006 | 83.95 | 0.99455 | 40714 P | -1.03  | 48.39 | 0.73795 | 10658 |
| Map2k2        | A_51_P439626 | NM_023138          | mitogen activated protein kinase kinase 2     | -1.006 | 83.36 | 0.9925  | 40360 P | -1.171 | 5.75  | 0.12271 | 3554  |
| Pde8a         | A_52_P391000 | NM_008803          | phosphodiesterase 8A                          | -1.006 | 83.95 | 0.99428 | 32548 P | -1.006 | 49.48 | 0.93029 | 12390 |
| Rhof          | A_51_P288802 | ENSMUST00000031401 | ras homolog gene family, member f             | -1.006 | 83.36 | 0.99146 | 32454 M | -1.015 | 49.48 | 0.83616 | 11497 |
| Tnk2          | A_51_P386189 | NM_016788          | tyrosine kinase, non-receptor, 2              | -1.006 | 83.36 | 0.99147 | 40246 P | 1.114  | 16.2  | 0.34141 | 6785  |
| Zfyve1        | A_51_P181746 | NM_183154          | zinc finger, FYVE domain containing 1         | -1.006 | 83.36 | 0.99155 | 40288 P | -1.062 | 30.75 | 0.2185  | 5179  |
| 2610206B13Rik | A_51_P135939 | NM_026047          | RIKEN cDNA 2610206B13 gene                    | -1.007 | 83.36 | 0.99275 | 40396 P | -1.048 | 42.43 | 0.3817  | 7299  |
| 2700038C09Rik | A_51_P299266 | NM_025598          | RIKEN cDNA 2700038C09 gene                    | -1.007 | 83.36 | 0.99348 | 40522 P | 1.007  | 42.43 | 0.90099 | 12094 |
| 2900009J20Rik | A_51_P491835 | AK013507           | RIKEN cDNA 2900009J20 gene                    | -1.007 | 83.95 | 0.99518 | 40749 P | -1.096 | 19.02 | 0.17513 | 4481  |
| Chchd2        | A_52_P20354  | NM_024166          | coiled-coil-helix-coiled-coil-helix domain c  | -1.007 | 83.36 | 0.99192 | 26649 M | 1.031  | 30.75 | 0.45532 | 8051  |
| Ppap2b        | A_51_P503433 | NM_080555          | phosphatidic acid phosphatase type 2B         | -1.007 | 83.36 | 0.991   | 40157 P | 1.278  | 3.82  | 0.12025 | 3498  |
| Sf3b1         | A_52_P220190 | NM_031179          | splicing factor 3b, subunit 1                 | -1.007 | 83.36 | 0.99401 | 40581 P | 1.047  | 25.31 | 0.32154 | 6581  |
| 9130404D14Rik | A_51_P429040 | NM_146119          | RIKEN cDNA 9130404D14 gene                    | -1.008 | 83.36 | 0.99268 | 40383 P | 1.015  | 42.43 | 0.83133 | 11472 |
| Atxn7l2       | A_52_P287195 | NM_175183          | ataxin 7-like 2                               | -1.008 | 83.36 | 0.98946 | 39927 P | -1.013 | 49.48 | 0.81226 | 11298 |
| E430014L09Rik | A_51_P107752 | AK033357           | RIKEN cDNA E430014L09 gene                    | -1.008 | 82.34 | 0.99156 | 35494 M | -1.158 | 2.04  | 0.03162 | 1244  |
| Fbxw5         | A_52_P563942 | NM_013908          | F-box and WD-40 domain protein 5              | -1.008 | 83.36 | 0.98933 | 39894 P | -1.104 | 13.58 | 0.12406 | 3582  |
| Fscn1         | A_51_P366061 | NM_007984          | fascin homolog 1, actin bundling protein      | -1.008 | 83.36 | 0.99427 | 40627 P | -1.001 | 49.48 | 0.98667 | 12945 |
| Kif3a         | A_51_P473907 | NM_008443          | kinesin family member 3A                      | -1.008 | 83.36 | 0.99141 | 40215 P | 1.134  | 4.63  | 0.0382  | 1452  |
| Pgk2          | A_51_P125487 | NM_031190          | phosphoglycerate kinase 2                     | -1.008 | 84.56 | 0.99275 | 35526 M | 1.146  | 3.46  | 0.02494 | 1032  |
| Tnip1         | A_51_P327261 | NM_021327          | TNFAIP3 interacting protein 1                 | -1.008 | 83.95 | 0.99427 | 40651 P | 1.036  | 28.13 | 0.41471 | 7676  |
| Tsc2          | A_51_P345714 | NM_011647          | tuberous sclerosis 2                          | -1.008 | 83.36 | 0.99348 | 40504 P | 1.09   | 13.58 | 0.21503 | 5122  |
| Zcchc9        | A_51_P187231 | NM_145453          | zinc finger, CCHC domain containing 9         | -1.008 | 83.36 | 0.98951 | 39961 P | 1.135  | 9.71  | 0.16039 | 4223  |
| 2310004I03Rik | A_51_P457397 | AK009140           | dipeptidylpeptidase 8                         | -1.009 | 83.36 | 0.98687 | 39446 P | -1.069 | 33.49 | 0.25635 | 5748  |
| Ddr1          | A_51_P161582 | L57509             | discooidin domain receptor family, membe      | -1.009 | 83.36 | 0.99428 | 26705 M | 1.081  | 9.71  | 0.09637 | 3024  |
| Mafk          | A_51_P306183 | NM_010757          | v-maf musculoaponeurotic fibrosarcoma         | -1.009 | 83.36 | 0.98964 | 40025 P | 1.083  | 13.58 | 0.15413 | 4117  |
| Nup205        | A_51_P177062 | AK014419           | nucleoporin 205                               | -1.009 | 61.79 | 0.99192 | 26635 M | 1.008  | 42.43 | 0.91901 | 12267 |
| Pank4         | A_51_P457054 | NM_172990          | pantothenate kinase 4                         | -1.009 | 83.36 | 0.99149 | 40274 P | -1.453 | 0.51  | 0.00584 | 48    |
| Prdm10        | A_52_P331056 | XM_983233          | PR domain containing 10                       | -1.009 | 83.36 | 0.98686 | 39434 M | -1.009 | 49.48 | 0.87463 | 11804 |
| Psbm6         | A_52_P199375 | NM_008946          | proteasome (prosome, macropain) subun         | -1.009 | 83.36 | 0.99344 | 40492 P | -1.067 | 36.07 | 0.32279 | 6592  |
| Rtn4ip1       | A_52_P172283 | NM_130892          | reticulon 4 interacting protein 1             | -1.009 | 83.36 | 0.98993 | 40048 P | -1.051 | 40.63 | 0.36214 | 7049  |
| S100a11       | A_51_P155643 | NM_016740          | S100 calcium binding protein A11 (calgizz     | -1.009 | 84.56 | 0.9925  | 32483 P | -1.063 | 40.63 | 0.39613 | 7475  |
| Sardh         | A_51_P492676 | NM_138665          | sarcosine dehydrogenase                       | -1.009 | 83.36 | 0.9929  | 40455 P | -1.053 | 43.15 | 0.47292 | 8227  |
| Thap11        | A_51_P480881 | NM_021513          | THAP domain containing 11                     | -1.009 | 83.36 | 0.9909  | 40153 P | -1.048 | 38.4  | 0.28489 | 6144  |
| Unc50         | A_51_P474509 | NM_026123          | unc-50 homolog (C. elegans)                   | -1.009 | 83.36 | 0.99181 | 26644 M | 1.003  | 42.43 | 0.97155 | 12761 |
| 1110008B24Rik | A_51_P153787 | NM_028632          | FCF1 small subunit (SSU) processome con       | -1.01  | 83.36 | 0.98951 | 39951 P | -1.013 | 49.48 | 0.83098 | 11471 |
| 2310016E02Rik | A_52_P316697 | NM_024460          | RIKEN cDNA 2310016E02 gene                    | -1.01  | 83.36 | 0.98789 | 39594 P | -1.254 | 0.51  | 0.00707 | 223   |
| Casp8ap2      | A_51_P517096 | NM_011997          | caspase 8 associated protein 2                | -1.01  | 83.36 | 0.98815 | 39633 P | -1.022 | 47.43 | 0.59497 | 9393  |
| Edg8          | A_51_P480169 | NM_053190          | endothelial differentiation, sphingolipid C   | -1.01  |       | 0.99614 | 15287 A | 1.1    | 8.32  | 0.06764 | 2356  |
| Hoxa5         | A_51_P310821 | NM_010453          | homeo box A5                                  | -1.01  | 83.36 | 0.99275 | 40412 P | 1.078  | 13.58 | 0.18589 | 4667  |

|               |              |              |                                               |        |       |         |         |        |       |         |       |
|---------------|--------------|--------------|-----------------------------------------------|--------|-------|---------|---------|--------|-------|---------|-------|
| Polr3d        | A_51_P223458 | NM_025945    | polymerase (RNA) III (DNA directed) poly      | -1.01  | 83.36 | 0.98883 | 39813 P | 1.059  | 19.02 | 0.22162 | 5236  |
| Prdm1         | A_51_P338746 | NM_007548    | PR domain containing 1, with ZNF domain       | -1.01  | 83.36 | 0.98663 | 39411 P | -1.09  | 22.1  | 0.17752 | 4525  |
| Pum1          | A_51_P423219 | NM_030722    | pumilio 1 (Drosophila)                        | -1.01  | 83.36 | 0.99274 | 26671 M | 1.299  | 1.62  | 0.02638 | 1086  |
| Slc40a1       | A_51_P389988 | NM_016917    | solute carrier family 40 (iron-regulated tra  | -1.01  | 82.34 | 0.98526 | 39293 P | 1.175  | 4.63  | 0.05019 | 1855  |
| Cgrrf1        | A_51_P331462 | NM_026832    | cell growth regulator with ring finger dom    | -1.011 | 83.36 | 0.98815 | 39652 P | -1.022 | 47.92 | 0.62539 | 9676  |
| Creld1        | A_51_P205545 | NM_133930    | cysteine-rich with EGF-like domains 1         | -1.011 | 83.36 | 0.98896 | 39825 P | 1.028  | 36.07 | 0.6899  | 10240 |
| Man2a1        | A_51_P324923 | NM_008549    | mannosidase 2, alpha 1                        | -1.011 | 82.34 | 0.98482 | 39270 P | 1.061  | 22.1  | 0.33029 | 6669  |
| Npas2         | A_52_P534749 | NM_008719    | neuronal PAS domain protein 2                 | -1.011 | 84.56 | 0.98845 | 32356 M | 1.149  | 11.33 | 0.26736 | 5907  |
| Ruvbl2        | A_51_P133198 | NM_011304    | RuvB-like protein 2                           | -1.011 | 83.36 | 0.9862  | 39353 P | 1.021  | 38.4  | 0.68208 | 10154 |
| Tm4sf1        | A_51_P240614 | NM_008536    | transmembrane 4 superfamily member 1          | -1.011 | 83.36 | 0.98825 | 39759 P | 1.027  | 42.43 | 0.91646 | 12234 |
| 0610025P10Rik | A_51_P211822 | NM_001013414 | RIKEN cDNA 0610025P10 gene                    | -1.012 | 83.36 | 0.9925  | 40371 P | 1.097  | 13.58 | 0.24312 | 5552  |
| 2500003M10Rik | A_52_P510647 | NM_023215    | RIKEN cDNA 2500003M10 gene                    | -1.012 | 82.34 | 0.98164 | 38915 P | 1.046  | 36.07 | 0.7617  | 10871 |
| Ap1gbbp1      | A_51_P245546 | NM_194341    | AP1 gamma subunit binding protein 1           | -1.012 | 83.36 | 0.98789 | 39605 P | 1.14   | 16.2  | 0.40566 | 7572  |
| Ces3          | A_51_P375969 | NM_053200    | carboxylesterase 3                            | -1.012 | 83.95 | 0.99538 | 40812 P | 1.247  | 1.17  | 0.00957 | 344   |
| Il6st         | A_51_P473888 | NM_010560    | interleukin 6 signal transducer               | -1.012 | 83.36 | 0.98687 | 39453 P | 1.072  | 16.2  | 0.19865 | 4879  |
| Pecr          | A_51_P291749 | NM_023523    | peroxisomal trans-2-enoyl-CoA reductase       | -1.012 | 82.34 | 0.98219 | 39016 P | 1.04   | 30.75 | 0.46325 | 8143  |
| Repin1        | A_52_P221887 | NM_175099    | replication initiator 1                       | -1.012 | 83.36 | 0.98815 | 39728 P | 1.067  | 16.2  | 0.18425 | 4641  |
| Stambp        | A_51_P278103 | NM_024239    | Stam binding protein                          | -1.012 | 83.36 | 0.98779 | 39575 P | 1.139  | 3.82  | 0.02803 | 1138  |
| 1810055E12Rik | A_51_P464149 | NM_026437    | RIKEN cDNA 1810055E12 gene                    | -1.013 | 83.36 | 0.98509 | 39290 P | 1.08   | 22.1  | 0.41732 | 7713  |
| 6330503K22Rik | A_52_P344160 | NM_182995    | RIKEN cDNA 6330503K22 gene                    | -1.013 | 82.34 | 0.98078 | 38621 P | -1.04  | 43.15 | 0.35968 | 7002  |
| Fastk         | A_51_P348764 | NM_023229    | Fas-activated serine/threonine kinase         | -1.013 | 83.36 | 0.98815 | 39720 P | -1.071 | 22.1  | 0.13774 | 3802  |
| Hap1          | A_51_P516728 | NM_010404    | huntingtin-associated protein 1               | -1.013 | 83.36 | 0.99283 | 26677 M | 1.224  | 5.75  | 0.13661 | 3779  |
| Tbxa2r        | A_52_P55772  | NM_009325    | thromboxane A2 receptor                       | -1.013 | 83.36 | 0.99148 | 40261 P | 1.26   | 2.53  | 0.03311 | 1296  |
| Usp10         | A_51_P280200 | NM_009462    | ubiquitin specific peptidase 10               | -1.013 | 83.36 | 0.98946 | 39922 P | -1.109 | 6.98  | 0.06217 | 2198  |
| Wdr23         | A_51_P275395 | NM_133734    | WD repeat domain 23                           | -1.013 | 83.36 | 0.98765 | 39524 P | 1.142  | 5.75  | 0.06049 | 2162  |
| Appbp1        | A_51_P200838 | NM_144931    | amyloid beta precursor protein binding p      | -1.014 | 82.34 | 0.98078 | 38610 P | 1.01   | 42.43 | 0.82749 | 11431 |
| Arf2          | A_51_P123345 | NM_007477    | ADP-ribosylation factor 2                     | -1.014 | 82.34 | 0.98173 | 38957 P | -1.035 | 46.3  | 0.60637 | 9497  |
| Hells         | A_51_P351970 | NM_008234    | helicase, lymphoid specific                   | -1.014 | 83.36 | 0.9925  | 40374 P | -1.049 | 36.07 | 0.26081 | 5832  |
| Usp1          | A_51_P381657 | NM_146144    | ubiquitin specific peptidase 1                | -1.014 | 83.36 | 0.9867  | 39430 P | -1.073 | 36.07 | 0.38438 | 7331  |
| 2310004I24Rik | A_52_P293724 | NM_025510    | RIKEN cDNA 2310004I24 gene                    | -1.015 | 83.36 | 0.98815 | 39630 P | 1.03   | 33.49 | 0.51359 | 8705  |
| Asb6          | A_51_P478610 | NM_133346    | ankyrin repeat and SOCS box-containing p      | -1.015 | 83.36 | 0.98946 | 39906 P | 1.022  | 38.4  | 0.70073 | 10323 |
| Pira2         | A_52_P506407 | NM_011089    | paired-Ig-like receptor A1                    | -1.015 | 82.34 | 0.9826  | 39091 P | -1.113 | 9.71  | 0.1018  | 3141  |
| Rabgef1       | A_51_P109923 | NM_019983    | RAB guanine nucleotide exchange factor        | -1.015 | 82.34 | 0.98109 | 38797 P | -1.012 | 49.48 | 0.79572 | 11144 |
| Tnfaip2       | A_51_P364485 | NM_009396    | tumor necrosis factor, alpha-induced prot     | -1.015 | 82.34 | 0.98165 | 38944 P | 1.012  | 42.43 | 0.80411 | 11210 |
| Tufm          | A_51_P165617 | NM_172745    | Tu translation elongation factor, mitochor    | -1.015 | 82.34 | 0.98326 | 39140 P | 1.041  | 28.13 | 0.38865 | 7383  |
| Wnt11         | A_51_P503131 | NM_009519    | wingless-related MMTV integration site 1      | -1.015 | 82.34 | 0.98244 | 39068 P | -1.098 | 25.31 | 0.27059 | 5964  |
| Bcl11b        | A_51_P171772 | NM_021399    | B-cell leukemia/lymphoma 11B                  | -1.016 | 81.02 | 0.98078 | 31904 M | -1.087 | 13.58 | 0.10259 | 3163  |
| Eif3s2        | A_51_P519189 | NM_018799    | eukaryotic translation initiation factor 3, s | -1.016 | 83.36 | 0.98951 | 39957 P | 1.023  | 38.4  | 0.71117 | 10414 |
| Grhpr         | A_51_P427432 | NM_080289    | glyoxylate reductase/hydroxypyruvate rec      | -1.016 | 82.34 | 0.98109 | 38695 P | 1.008  | 42.43 | 0.8781  | 11841 |
| Rabl5         | A_51_P495077 | NM_026073    | RAB, member of RAS oncogene family-like       | -1.016 | 83.36 | 0.98687 | 39455 P | 1.088  | 11.33 | 0.11794 | 3435  |
| Scap          | A_52_P485971 | NM_001001144 | SREBF chaperone                               | -1.016 | 83.36 | 0.98815 | 39707 P | -1.36  | 0.51  | 0.00619 | 127   |
| Scnm1         | A_51_P284597 | NM_027013    | sodium channel modifier 1                     | -1.016 | 83.36 | 0.98733 | 39497 P | -1.338 | 0.51  | 0.00697 | 214   |
| Wdr3          | A_51_P112445 | NM_175552    | WD repeat domain 3                            | -1.016 | 82.34 | 0.97772 | 38280 P | 1.044  | 28.13 | 0.42912 | 7817  |
| 0610010K14Rik | A_51_P349951 | NM_026757    | RIKEN cDNA 0610010K14 gene                    | -1.017 | 82.34 | 0.98109 | 38701 P | -1.065 | 36.07 | 0.33033 | 6673  |
| Atp7b         | A_51_P510997 | NM_007511    | ATPase, Cu++ transporting, beta polypept      | -1.017 | 82.34 | 0.98014 | 38520 P | 1.038  | 28.13 | 0.3643  | 7077  |
| Slc35a1       | A_51_P514421 | NM_011895    | solute carrier family 35 (CMP-sialic acid tr  | -1.017 | 82.34 | 0.97483 | 37949 P | 1.007  | 42.43 | 0.89086 | 11977 |
| Taldo1        | A_51_P401958 | NM_011528    | transaldolase 1                               | -1.017 | 82.34 | 0.98413 | 26357 M | 1.078  | 19.02 | 0.35758 | 6984  |
| Ypel3         | A_52_P326808 | NM_026875    | yippee-like 3 (Drosophila)                    | -1.017 | 82.34 | 0.98109 | 38752 P | 1.1    | 16.2  | 0.36407 | 7073  |
| 2610529C04Rik | A_52_P79385  | NM_025952    | RIKEN cDNA 2610529C04 gene                    | -1.018 | 82.34 | 0.97879 | 38371 P | 1.11   | 9.71  | 0.10041 | 3108  |
| BC003940      | A_51_P176138 | BC052229     | cDNA sequence BC003940                        | -1.018 | 82.34 | 0.97307 | 37768 P | -1.037 | 45.05 | 0.4998  | 8576  |
| Eef1e1        | A_51_P164420 | NM_025380    | eukaryotic translation elongation factor 1    | -1.018 | 82.34 | 0.97921 | 38429 P | 1.064  | 28.13 | 0.59776 | 9434  |
| Gadd45a       | A_51_P296608 | NM_007836    | growth arrest and DNA-damage-inducible        | -1.018 | 83.36 | 0.98906 | 39868 P | -1.064 | 25.31 | 0.1631  | 4272  |
| Mcart1        | A_52_P169901 | NM_001009949 | mitochondrial carrier triple repeat 1         | -1.018 | 82.34 | 0.97889 | 38411 P | 1.15   | 3.46  | 0.02523 | 1044  |

|               |              |              |                                              |        |       |         |         |        |       |         |       |
|---------------|--------------|--------------|----------------------------------------------|--------|-------|---------|---------|--------|-------|---------|-------|
| Pafah1b3      | A_51_P267024 | NM_008776    | platelet-activating factor acetylhydrolase,  | -1.018 | 82.34 | 0.98165 | 38930 P | 1.143  | 5.75  | 0.04454 | 1660  |
| Armcx1        | A_51_P496001 | NM_030066    | armadillo repeat containing, X-linked 1      | -1.019 | 82.34 | 0.97483 | 37976 P | -1.02  | 49.48 | 0.85836 | 11666 |
| Dhrs7         | A_51_P312437 | NM_025522    | dehydrogenase/reductase (SDR family) m       | -1.019 | 82.34 | 0.98413 | 39188 P | 1.055  | 25.31 | 0.43222 | 7859  |
| Etfb          | A_51_P155212 | NM_026695    | electron transferring flavoprotein, beta p   | -1.019 | 83.36 | 0.98771 | 39552 P | 1.117  | 8.32  | 0.09215 | 2944  |
| Lsm4          | A_51_P116487 | NM_015816    | LSM4 homolog, U6 small nuclear RNA ass       | -1.019 | 83.36 | 0.98765 | 39504 P | -1.37  | 0.51  | 0.00584 | 81    |
| Mybbp1a       | A_51_P332627 | NM_016776    | MYB binding protein (P160) 1a                | -1.019 | 82.34 | 0.97577 | 38048 P | -1.03  | 46.85 | 0.61023 | 9528  |
| Ntan1         | A_52_P566579 | NM_010946    | N-terminal Asn amidase                       | -1.019 | 82.34 | 0.97808 | 38300 P | 1.119  | 11.33 | 0.19597 | 4837  |
| Txnrd1        | A_51_P320614 | NM_001042523 | thioredoxin reductase 1                      | -1.019 | 82.34 | 0.98561 | 26390 M | 1.084  | 13.58 | 0.17869 | 4549  |
| 2810405J04Rik | A_51_P353173 | NM_133747    | RIKEN cDNA 2810405J04 gene                   | -1.02  | 82.34 | 0.98078 | 26166 M | 1.193  | 3.82  | 0.0484  | 1807  |
| 6720489N17Rik | A_51_P306446 | AK033958     | RIKEN cDNA 6720489N17 gene                   | -1.02  | 82.34 | 0.97707 | 38199 P | 1.08   | 16.2  | 0.21823 | 5170  |
| Gcn5l2        | A_51_P312528 | NM_020004    | GCN5 general control of amino acid synth     | -1.02  | 82.34 | 0.97842 | 38340 P | -1.067 | 30.75 | 0.21237 | 5081  |
| Mrg2          | A_52_P575691 | NM_008627    | myeloid ecotropic viral integration site-re  | -1.02  | 82.34 | 0.97577 | 38051 P | 1.066  | 13.58 | 0.15513 | 4137  |
| Pcbp1         | A_52_P241129 | NM_011865    | poly(rC) binding protein 1                   | -1.02  | 82.34 | 0.98183 | 26275 M | 1.065  | 30.75 | 0.71908 | 10473 |
| Ppp2r4        | A_52_P477919 | NM_138748    | protein phosphatase 2A, regulatory subu      | -1.02  | 82.34 | 0.98123 | 38821 P | -1.113 | 4.63  | 0.05285 | 1944  |
| Slit1         | A_51_P101388 | NM_015748    | slit homolog 1 (Drosophila)                  | -1.02  | 82.34 | 0.97386 | 37869 P | -1.019 | 49.39 | 0.73901 | 10680 |
| Strn3         | A_52_P140604 | NM_052973    | striatin, calmodulin binding protein 3       | -1.02  | 82.34 | 0.97921 | 26096 M | 1.113  | 9.71  | 0.11836 | 3445  |
| 1300001I01Rik | A_51_P354272 | AK154925     | RIKEN cDNA 1300001I01 gene                   | -1.021 | 82.34 | 0.97807 | 38295 P | 1.105  | 9.71  | 0.08656 | 2815  |
| 1700021F05Rik | A_51_P349825 | NM_026411    | RIKEN cDNA 1700021F05 gene                   | -1.021 | 82.34 | 0.98436 | 39221 P | -1.101 | 19.02 | 0.18161 | 4607  |
| 2410018C17Rik | A_51_P440522 | NM_178390    | RIKEN cDNA 2410018C17 gene                   | -1.021 | 82.34 | 0.98036 | 38538 P | 1.085  | 16.2  | 0.31012 | 6449  |
| AI929863      | A_51_P142989 | XM_920647    | RIKEN cDNA 2810487A22 gene                   | -1.021 | 82.34 | 0.98105 | 38665 P | 1.082  | 11.33 | 0.11265 | 3331  |
| Cndp2         | A_51_P449048 | NM_023149    | CNDP dipeptidase 2 (metallopeptidase M       | -1.021 | 82.34 | 0.97013 | 37416 P | -1.03  | 47.43 | 0.6527  | 9897  |
| Elmod2        | A_51_P184806 | NM_178736    | ELMO domain containing 2                     | -1.021 | 81.02 | 0.96549 | 37020 P | 1.058  | 19.02 | 0.24817 | 5620  |
| Hif1a         | A_51_P387608 | NM_010431    | hypoxia inducible factor 1, alpha subunit    | -1.021 | 82.34 | 0.98078 | 26174 M | -1.097 | 36.07 | 0.45503 | 8049  |
| Slc2a1        | A_51_P464738 | NM_011400    | solute carrier family 2 (facilitated glucose | -1.021 | 82.34 | 0.97194 | 37614 P | -1.262 | 0.66  | 0.01567 | 672   |
| Twist2        | A_51_P165504 | NM_007855    | twist homolog 2 (Drosophila)                 | -1.021 | 82.34 | 0.98322 | 39135 P | 1.117  | 6.98  | 0.04969 | 1843  |
| Wbp11         | A_51_P448987 | NM_021714    | WW domain binding protein 11                 | -1.021 | 82.34 | 0.98109 | 38745 P | 1.022  | 40.63 | 0.84229 | 11539 |
| Wbp2          | A_51_P358940 | NM_016852    | WW domain binding protein 2                  | -1.021 | 83.36 | 0.98706 | 39482 P | 1.072  | 13.58 | 0.15101 | 4054  |
| Dctn6         | A_51_P357085 | NM_011722    | dynactin 6                                   | -1.022 | 82.34 | 0.96774 | 37248 P | 1.091  | 13.58 | 0.16435 | 4284  |
| Fbl           | A_51_P349142 | NM_007991    | fibrillarlin                                 | -1.022 | 82.34 | 0.98149 | 38880 P | 1.117  | 9.71  | 0.1484  | 4014  |
| Hdac3         | A_51_P483089 | NM_010411    | histone deacetylase 3                        | -1.022 | 82.34 | 0.9733  | 37799 P | 1.088  | 9.71  | 0.08963 | 2886  |
| Mgrn1         | A_51_P442402 | NM_029657    | mahogunin, ring finger 1                     | -1.022 | 82.34 | 0.98109 | 38726 P | -1.003 | 49.48 | 0.96902 | 12736 |
| Pqbp1         | A_51_P135322 | NM_019478    | polyglutamine binding protein 1              | -1.022 | 82.34 | 0.97601 | 38073 P | -1.055 | 36.07 | 0.25338 | 5705  |
| Rabl4         | A_51_P474422 | NM_025931    | RAB, member of RAS oncogene family-like      | -1.022 | 82.34 | 0.98173 | 38970 P | 1.022  | 38.4  | 0.65581 | 9929  |
| Sf3a2         | A_51_P389785 | NM_013651    | splicing factor 3a, subunit 2                | -1.022 | 82.34 | 0.98118 | 38811 P | 1.054  | 19.02 | 0.23333 | 5405  |
| Tbl3          | A_52_P510771 | NM_145396    | transducin (beta)-like 3                     | -1.022 | 82.34 | 0.97042 | 37460 P | 1.01   | 42.43 | 0.86371 | 11715 |
| Atoh1         | A_51_P383704 | NM_007500    | atonal homolog 1 (Drosophila)                | -1.024 | 81.02 | 0.96973 | 31330 M | 1.195  | 8.32  | 0.23778 | 5458  |
| Bag5          | A_51_P216315 | NM_027404    | BCL2-associated athanogene 5                 | -1.024 | 82.34 | 0.97199 | 37642 P | -1.009 | 49.48 | 0.9219  | 12281 |
| Edg6          | A_51_P307944 | NM_010102    | endothelial differentiation, G-protein-cou   | -1.024 | 81.02 | 0.9688  | 31292 M | -1.044 | 45.68 | 0.64784 | 9864  |
| Gas6          | A_51_P172054 | NM_019521    | growth arrest specific 6                     | -1.024 | 82.34 | 0.98636 | 26403 M | 1.352  | 3.82  | 0.13472 | 3761  |
| Hsd1l         | A_51_P396297 | NM_175185    | hydroxysteroid dehydrogenase like 1          | -1.024 | 82.34 | 0.97483 | 37944 P | -1.03  | 46.3  | 0.56138 | 9124  |
| Leprel2       | A_51_P149699 | NM_013534    | leprecan-like 2                              | -1.024 | 82.34 | 0.98157 | 38906 P | -1.017 | 49    | 0.69502 | 10278 |
| Rab4a         | A_51_P282883 | NM_009003    | RAB4A, member RAS oncogene family            | -1.024 | 82.34 | 0.98165 | 38917 P | 1.045  | 25.31 | 0.30885 | 6427  |
| Sez6l2        | A_51_P369154 | NM_144926    | seizure related 6 homolog like 2             | -1.024 | 75.14 | 0.98547 | 29308 M | 1.031  | 36.07 | 0.64243 | 9821  |
| Snai2         | A_51_P305547 | NM_011415    | snail homolog 2 (Drosophila)                 | -1.024 | 82.34 | 0.98109 | 38753 P | -1.027 | 46.3  | 0.52827 | 8822  |
| 2210013K02Rik | A_51_P168745 | NM_023712    | RIKEN cDNA 2210013K02 gene                   | -1.025 | 82.34 | 0.97964 | 38490 P | -1.057 | 33.49 | 0.21655 | 5148  |
| BC012278      | A_51_P417861 | NM_146231    | cDNA sequence BC012278                       | -1.025 | 82.34 | 0.96647 | 37146 P | 1.036  | 30.75 | 0.53265 | 8870  |
| Gatm          | A_51_P461319 | NM_025961    | glycine amidinotransferase (L-arginine:gly   | -1.025 | 79.26 | 0.98109 | 31984 P | 1.094  | 19.02 | 0.36527 | 7102  |
| Mal2          | A_51_P353252 | NM_178920    | mal, T-cell differentiation protein 2        | -1.025 | 82.34 | 0.97949 | 38452 P | -1.035 | 46.85 | 0.69459 | 10274 |
| Ndufs3        | A_51_P395014 | NM_026688    | NADH dehydrogenase (ubiquinone) Fe-S         | -1.025 | 82.34 | 0.98163 | 26256 M | 1.093  | 13.58 | 0.18638 | 4676  |
| Psme1         | A_51_P101196 | NM_011189    | proteasome (prosome, macropain) 28 sub       | -1.025 | 82.34 | 0.97391 | 37871 P | -1.181 | 4.63  | 0.11894 | 3466  |
| 1190005P17Rik | A_52_P139478 | NM_025431    | RIKEN cDNA 1190005P17 gene                   | -1.026 | 82.34 | 0.98127 | 38832 P | 1      | 42.43 | 0.99465 | 13011 |
| Fkbp8         | A_51_P220739 | NM_010223    | FK506 binding protein 8                      | -1.026 | 81.02 | 0.95942 | 36340 P | -1.129 | 3.01  | 0.03429 | 1318  |
| Mrps18a       | A_51_P275083 | NM_026768    | mitochondrial ribosomal protein S18A         | -1.026 | 81.02 | 0.95883 | 36299 P | 1.094  | 8.32  | 0.07325 | 2484  |

|               |              |              |                                               |        |       |         |         |        |       |         |       |
|---------------|--------------|--------------|-----------------------------------------------|--------|-------|---------|---------|--------|-------|---------|-------|
| Plxnd1        | A_52_P472319 | AK147513     | plexin D1                                     | -1.026 | 82.34 | 0.97111 | 37523 P | -1.067 | 36.07 | 0.34986 | 6873  |
| Rabl2a        | A_52_P554007 | NM_026817    | RAB, member of RAS oncogene family-like       | -1.026 | 82.34 | 0.96876 | 37346 P | 1.059  | 25.31 | 0.39743 | 7493  |
| Rph3al        | A_52_P396401 | NM_029548    | rabphilin 3A-like (without C2 domains)        | -1.026 | 82.34 | 0.96778 | 37257 P | -1.035 | 46.85 | 0.65776 | 9953  |
| Sfrs16        | A_52_P19016  | NM_016680    | splicing factor, arginine/serine-rich 16 (su  | -1.026 | 82.34 | 0.9824  | 39043 P | -1.05  | 38.4  | 0.29524 | 6277  |
| 5830454D03Rik | A_51_P176387 | AK077784     | RIKEN cDNA 5830454D03 gene                    | -1.027 | 81.02 | 0.96369 | 36789 P | 1.17   | 8.32  | 0.19014 | 4723  |
| Adipoq        | A_51_P458451 | NM_009605    | adiponectin, C1Q and collagen domain co       | -1.027 | 81.02 | 0.95593 | 35942 P | 1.036  | 30.75 | 0.48668 | 8404  |
| BC057593      | A_52_P391058 | NM_001045559 | RIKEN cDNA C920016K16 gene                    | -1.027 | 81.02 | 0.95986 | 36380 P | -1.158 | 3.01  | 0.04817 | 1801  |
| D10Wsu52e     | A_51_P223720 | NM_145422    | DNA segment, Chr 10, Wayne State Unive        | -1.027 | 82.34 | 0.97328 | 37789 P | -1.093 | 25.31 | 0.26714 | 5905  |
| Gstm5         | A_51_P260169 | NM_010360    | glutathione S-transferase, mu 5               | -1.027 | 81.02 | 0.96115 | 36490 P | -1.155 | 1.58  | 0.02236 | 944   |
| Ntn1          | A_51_P147123 | NM_008744    | netrin 1                                      | -1.027 | 79.26 | 0.97419 | 28777 M | 1.03   | 33.49 | 0.53987 | 8945  |
| Rpl18         | A_52_P436621 | NM_009077    | ribosomal protein L18                         | -1.027 | 82.34 | 0.97644 | 26000 M | -1.152 | 8.32  | 0.14104 | 3864  |
| Srf           | A_51_P100289 | NM_020493    | serum response factor                         | -1.027 | 82.34 | 0.98413 | 39182 P | 1.017  | 40.63 | 0.71389 | 10437 |
| Top3a         | A_51_P203451 | NM_009410    | topoisomerase (DNA) III alpha                 | -1.027 | 82.34 | 0.97199 | 37647 P | 1.097  | 9.71  | 0.11075 | 3282  |
| Traf2         | A_51_P270819 | NM_009422    | Tnf receptor-associated factor 2              | -1.027 | 82.34 | 0.96778 | 37253 P | -1.091 | 11.33 | 0.08772 | 2833  |
| Zfp598        | A_51_P329855 | NM_183149    | zinc finger protein 598                       | -1.027 | 81.02 | 0.96504 | 36980 P | 1.003  | 42.43 | 0.94339 | 12514 |
| Adamts16      | A_52_P424231 | NM_172053    | a disintegrin-like and metalloproteinase (re  | -1.028 | 79.26 | 0.95928 | 33477 M | 1.003  | 42.43 | 0.94253 | 12506 |
| Dpm2          | A_52_P80444  | NM_010073    | dolichol-phosphate (beta-D) mannosyltra       | -1.028 | 81.02 | 0.96099 | 36480 P | -1.019 | 49.39 | 0.735   | 10626 |
| Eif3s9        | A_52_P414692 | NM_133916    | eukaryotic translation initiation factor 3, s | -1.028 | 81.02 | 0.9618  | 36640 P | -1.108 | 6.98  | 0.06763 | 2354  |
| Evl           | A_51_P433467 | NM_007965    | Ena-vasodilator stimulated phosphoprote       | -1.028 | 82.34 | 0.98078 | 26182 M | 1.188  | 2.53  | 0.01584 | 684   |
| Gpsm1         | A_51_P386585 | NM_153410    | G-protein signalling modulator 1 (AGS3-li     | -1.028 | 81.02 | 0.96103 | 36486 P | -1.004 | 49.48 | 0.96283 | 12689 |
| Pnrc1         | A_52_P619820 | NM_001033225 | proline-rich nuclear receptor coactivator     | -1.028 | 79.26 | 0.97194 | 28696 M | 1.369  | 0.35  | 0.00731 | 246   |
| Ptdss1        | A_51_P442053 | NM_008959    | phosphatidylserine synthase 1                 | -1.028 | 82.34 | 0.97964 | 38491 P | -1.045 | 43.15 | 0.41566 | 7683  |
| Rplp2         | A_52_P134382 | NM_026020    | ribosomal protein, large P2                   | -1.028 | 82.34 | 0.98109 | 26206 M | 1.042  | 30.75 | 0.55731 | 9084  |
| Echs1         | A_51_P409039 | NM_053119    | enoyl Coenzyme A hydratase, short chain       | -1.029 | 82.34 | 0.97862 | 26073 M | 1.042  | 30.75 | 0.49031 | 8435  |
| Mcrs1         | A_52_P682450 | NM_016766    | microspherule protein 1                       | -1.029 | 82.34 | 0.97618 | 38102 P | 1.034  | 33.49 | 0.58051 | 9261  |
| Mrpl24        | A_51_P203597 | NM_026591    | mitochondrial ribosomal protein L24           | -1.029 | 84.22 | 0.97767 | 28956 M | 1.024  | 40.63 | 0.81995 | 11355 |
| Pex6          | A_52_P656565 | NM_145488    | peroxisomal biogenesis factor 6               | -1.029 | 82.34 | 0.97197 | 37629 P | -1.017 | 49.48 | 0.88711 | 11933 |
| Rhbf1         | A_52_P141322 | NM_010117    | rhomboid family 1 (Drosophila)                | -1.029 | 82.34 | 0.96558 | 37049 P | 1.103  | 8.32  | 0.07728 | 2579  |
| Sf3b2         | A_51_P280158 | NM_030109    | splicing factor 3b, subunit 2                 | -1.029 | 82.34 | 0.97035 | 37438 P | 1.093  | 13.58 | 0.20389 | 4950  |
| Sri           | A_51_P489313 | NM_025618    | sorcin                                        | -1.029 | 81.02 | 0.96091 | 36460 P | -1.032 | 45.68 | 0.54981 | 9020  |
| Gm587         | A_52_P269445 | NM_001009950 | were model 587, (NCBI)                        | -1.03  | 82.34 | 0.97925 | 38430 P | 1.069  | 28.13 | 0.61361 | 9562  |
| Wdr45         | A_51_P139069 | NM_172372    | WD repeat domain 45                           | -1.03  | 82.34 | 0.98078 | 38618 P | -1.101 | 8.32  | 0.07021 | 2401  |
| 6330409N04Rik | A_51_P468742 | NM_025697    | RIKEN cDNA 6330409N04 gene                    | -1.031 | 81.02 | 0.95609 | 36021 P | 1.028  | 36.07 | 0.616   | 9588  |
| AA673488      | A_51_P218833 | AK164438     | expressed sequence AA673488                   | -1.031 | 81.02 | 0.96442 | 36829 P | 1.004  | 42.43 | 0.94212 | 12501 |
| Copb1         | A_51_P160113 | NM_033370    | coatamer protein complex, subunit beta        | -1.031 | 81.02 | 0.96163 | 36539 P | 1.156  | 5.75  | 0.0571  | 2062  |
| Eomes         | A_51_P332309 | NM_010136    | eomesodermin homolog (Xenopus laevis)         | -1.031 | 82.34 | 0.98037 | 31866 M | 1.138  | 3.82  | 0.02835 | 1155  |
| Lgals3bp      | A_51_P359636 | NM_011150    | lectin, galactoside-binding, soluble, 3 bin   | -1.031 | 82.34 | 0.98202 | 26292 M | -1.219 | 1.62  | 0.05496 | 2005  |
| Lrp6          | A_51_P169401 | NM_008514    | low density lipoprotein receptor-related p    | -1.031 | 82.34 | 0.97767 | 38252 P | 1.124  | 16.2  | 0.44678 | 7979  |
| Usp5          | A_51_P450632 | NM_013700    | ubiquitin specific peptidase 5 (isopeptida    | -1.031 | 81.02 | 0.96482 | 36876 P | 1.157  | 3.82  | 0.03242 | 1274  |
| Adsl          | A_51_P269320 | NM_009634    | adenylosuccinate lyase 1                      | -1.032 | 81.02 | 0.96549 | 37027 P | 1.077  | 16.2  | 0.24779 | 5612  |
| BC021438      | A_51_P112644 | NM_145416    | cDNA sequence BC021438                        | -1.032 | 81.02 | 0.95914 | 36309 P | -1.034 | 43.75 | 0.41266 | 7646  |
| Bhlhb2        | A_51_P272553 | NM_011498    | basic helix-loop-helix domain containing,     | -1.032 | 81.02 | 0.9648  | 36875 P | -1.059 | 42.43 | 0.47734 | 8285  |
| Cdh1          | A_51_P137336 | NM_009864    | cadherin 1                                    | -1.032 | 81.02 | 0.9615  | 36517 P | 1.289  | 1.17  | 0.01251 | 516   |
| Lgals9        | A_51_P500813 | NM_010708    | lectin, galactose binding, soluble 9          | -1.032 | 82.34 | 0.98238 | 39036 P | 1.041  | 28.13 | 0.38851 | 7380  |
| Oat1l         | A_51_P429284 | NM_172478    | TBC1 domain family, member 25                 | -1.032 | 79.26 | 0.94301 | 34841 P | 1      | 49.48 | 0.99824 | 13040 |
| Thtpa         | A_52_P674357 | NM_153083    | thiamine triphosphatase                       | -1.032 | 81.02 | 0.95071 | 35499 P | -1.229 | 0.56  | 0.02396 | 892   |
| Ubttd1        | A_51_P369371 | NM_145500    | ubiquitin domain containing 1                 | -1.032 | 82.34 | 0.97329 | 37793 P | -1.088 | 28.13 | 0.26315 | 5855  |
| Bcap31        | A_51_P440399 | NM_012060    | B-cell receptor-associated protein 31         | -1.033 | 81.02 | 0.96143 | 36514 P | 1.139  | 6.98  | 0.06242 | 2209  |
| Gypc          | A_51_P191199 | NM_001048207 | glycophorin C                                 | -1.033 | 81.02 | 0.96504 | 36954 P | 1.094  | 11.33 | 0.15511 | 4136  |
| Nrl           | A_52_P620355 | NM_008736    | neural retina leucine zipper gene             | -1.033 |       | 0.98094 | 19461 A | 1.081  | 11.33 | 0.11932 | 3471  |
| Coro1b        | A_51_P109888 | NM_011778    | coronin, actin binding protein 1B             | -1.034 | 79.26 | 0.9371  | 34352 P | -1.048 | 42.43 | 0.39103 | 7409  |
| Eif5a         | A_51_P120201 | NM_181582    | eukaryotic translation initiation factor 5A   | -1.034 | 81.02 | 0.95986 | 36370 P | 1.11   | 11.33 | 0.21662 | 5151  |
| Ftcd          | A_51_P413740 | NM_080845    | formiminotransferase cyclodeaminase           | -1.034 |       | 0.97199 | 22693 A | -1.035 | 47.43 | 0.73658 | 10646 |



|               |              |              |                                              |        |       |         |         |        |       |         |       |
|---------------|--------------|--------------|----------------------------------------------|--------|-------|---------|---------|--------|-------|---------|-------|
| G6pd2         | A_51_P353735 | NM_019468    | glucose-6-phosphate dehydrogenase 2          | -1.034 | 81.02 | 0.96005 | 36416 P | 1.08   | 22.1  | 0.43031 | 7827  |
| Pou3f2        | A_51_P487010 | NM_008899    | POU domain, class 3, transcription factor    | -1.034 | 81.02 | 0.94347 | 32365 M | 1.02   | 38.4  | 0.67749 | 10109 |
| Rheb          | A_51_P322334 | NM_053075    | RAS-homolog enriched in brain                | -1.034 | 82.34 | 0.97199 | 37656 P | 1.073  | 13.58 | 0.15393 | 4115  |
| 2610003J06Rik | A_51_P434776 | NM_028101    | RIKEN cDNA 2610003J06 gene                   | -1.035 | 81.02 | 0.95215 | 35749 P | 1.016  | 42.43 | 0.81758 | 11342 |
| 6620401K05Rik | A_51_P104527 | NM_172774    | RIKEN cDNA 6620401K05 gene                   | -1.035 | 82.34 | 0.97364 | 37848 P | 1.087  | 9.71  | 0.09324 | 2967  |
| Foxo1         | A_51_P138044 | NM_019739    | forkhead box O1                              | -1.035 | 81.02 | 0.95046 | 35475 P | 1.04   | 30.75 | 0.54239 | 8966  |
| Gnpat1        | A_51_P219542 | NM_019425    | glucosamine-phosphate N-acetyltransferase    | -1.035 | 81.02 | 0.96415 | 25492 M | -1.207 | 0.75  | 0.01266 | 533   |
| Gt(ROSA)26Sor | A_51_P426919 | U83174       | gene trap ROSA 26, Philippe Soriano          | -1.035 | 81.02 | 0.94583 | 35052 P | -1.001 | 49.48 | 0.99031 | 12988 |
| Myef2         | A_51_P281844 | AK129336     | myelin basic protein expression factor 2, l  | -1.035 | 81.02 | 0.96219 | 25431 M | -1.019 | 49    | 0.69769 | 10300 |
| PsmA6         | A_51_P428364 | NM_011968    | proteasome (prosome, macropain) subunit      | -1.035 | 81.02 | 0.94665 | 35135 P | 1.001  | 42.43 | 0.97774 | 12820 |
| StrA13        | A_52_P124429 | NM_016665    | stimulated by retinoic acid 13               | -1.035 | 81.02 | 0.96005 | 36401 P | -1.117 | 8.32  | 0.09447 | 2990  |
| AI480556      | A_52_P79038  | NM_001008422 | expressed sequence AI480556                  | -1.036 | 82.34 | 0.97371 | 37852 P | 1.004  | 42.43 | 0.95685 | 12635 |
| Ap2s1         | A_52_P128095 | NM_198613    | adaptor-related protein complex 2, sigma     | -1.036 | 81.02 | 0.96163 | 36548 P | 1.096  | 11.33 | 0.11575 | 3392  |
| Capn10        | A_51_P370252 | NM_011796    | calpain 10                                   | -1.036 | 81.02 | 0.96573 | 37060 P | -1.047 | 40.63 | 0.30774 | 6413  |
| Chst10        | A_51_P445562 | NM_145142    | carbohydrate sulfotransferase 10             | -1.036 | 81.02 | 0.95139 | 35629 P | 1.03   | 33.49 | 0.50642 | 8646  |
| Eif2b3        | A_51_P322056 | AK047344     | eukaryotic translation initiation factor 2B, | -1.036 | 81.02 | 0.94357 | 34879 P | 1.104  | 16.2  | 0.38315 | 7318  |
| Grina         | A_51_P200083 | NM_023168    | glutamate receptor, ionotropic, N-methyl     | -1.036 | 81.02 | 0.95609 | 35977 P | -1.065 | 30.75 | 0.21892 | 5188  |
| Lass2         | A_51_P517381 | NM_029789    | longevity assurance homolog 2 (S. cerevis    | -1.036 | 79.26 | 0.93023 | 33849 P | 1.092  | 16.2  | 0.29335 | 6260  |
| Mgat2         | A_51_P150521 | NM_146035    | mannoside acetylglucosaminyltransferase      | -1.036 | 79.26 | 0.93621 | 34286 P | 1.02   | 38.4  | 0.67914 | 10131 |
| Nrg3          | A_51_P177071 | NM_008734    | neuregulin 3                                 | -1.036 | 81.02 | 0.96573 | 37076 P | 1.016  | 42.43 | 0.81115 | 11288 |
| S100a6        | A_51_P281089 | NM_011313    | S100 calcium binding protein A6 (calyclin    | -1.036 | 83.36 | 0.9879  | 39615 P | 1.022  | 40.63 | 0.82428 | 11403 |
| Tmed1         | A_51_P221852 | NM_010744    | transmembrane emp24 domain containin         | -1.036 | 81.02 | 0.94301 | 34840 P | 1.035  | 30.75 | 0.47523 | 8262  |
| Usp22         | A_52_P413623 | NM_001004143 | ubiquitin specific peptidase 22              | -1.036 | 81.02 | 0.95609 | 36014 P | 1.241  | 2.53  | 0.0263  | 1083  |
| Usp28         | A_51_P216595 | NM_175482    | ubiquitin specific peptidase 28              | -1.036 | 82.34 | 0.97227 | 37734 P | 1.192  | 2.53  | 0.01945 | 818   |
| 1810009K13Rik | A_51_P494122 | NM_025462    | RIKEN cDNA 1810009K13 gene                   | -1.037 | 82.34 | 0.97483 | 37962 P | -1.13  | 9.71  | 0.13197 | 3710  |
| 2610029I01Rik | A_51_P358243 | AK154853     | RIKEN cDNA 2610029I01 gene                   | -1.037 | 81.02 | 0.95861 | 36282 P | -1.13  | 5.75  | 0.0768  | 2569  |
| 4833408C14Rik | A_51_P118664 | AK014663     | RIKEN cDNA 4833408C14 gene                   | -1.037 | 81.02 | 0.95657 | 36051 P | 1.058  | 25.31 | 0.45693 | 8070  |
| Adrm1         | A_51_P214631 | NM_019822    | adhesion regulating molecule 1               | -1.037 | 82.34 | 0.98109 | 38804 P | -1.006 | 49.48 | 0.93057 | 12394 |
| Brms1         | A_51_P154997 | NM_134155    | breast cancer metastasis-suppressor 1        | -1.037 | 81.02 | 0.95129 | 35602 P | -1.275 | 0.51  | 0.0067  | 211   |
| Foxf1a        | A_51_P262111 | NM_010426    | forkhead box F1a                             | -1.037 | 81.02 | 0.9516  | 30256 M | -1.062 | 38.4  | 0.33584 | 6743  |
| Glis2         | A_51_P366986 | NM_031184    | GLIS family zinc finger 2                    | -1.037 | 79.26 | 0.93621 | 34278 P | 1.013  | 42.43 | 0.83037 | 11455 |
| Hsd3b4        | A_51_P352005 | NM_008294    | hydroxy-delta-5-steroid dehydrogenase, 3     | -1.037 | 79.26 | 0.93998 | 29652 M | -1.037 | 44.4  | 0.44272 | 7942  |
| Mapk14        | A_51_P325343 | NM_011951    | mitogen activated protein kinase 14          | -1.037 | 81.02 | 0.95609 | 35952 P | 1.087  | 9.71  | 0.08145 | 2694  |
| Nr1h2         | A_51_P400203 | NM_009473    | nuclear receptor subfamily 1, group H, m     | -1.037 | 79.26 | 0.93985 | 34555 P | 1.01   | 42.43 | 0.82462 | 11407 |
| Pold2         | A_51_P342707 | NM_008894    | polymerase (DNA directed), delta 2, regul    | -1.037 | 81.02 | 0.96163 | 36558 P | 1.053  | 22.1  | 0.25373 | 5714  |
| Ranbp9        | A_51_P106191 | NM_019930    | RAN binding protein 9                        | -1.037 | 81.02 | 0.9493  | 35378 P | 1.131  | 6.98  | 0.07325 | 2486  |
| Relb          | A_51_P389751 | NM_009046    | avian reticuloendotheliosis viral (v-rel) on | -1.037 | 81.02 | 0.94386 | 34912 P | -1.087 | 30.75 | 0.34111 | 6780  |
| Xrcc1         | A_51_P343900 | NM_009532    | X-ray repair complementing defective rep     | -1.037 | 82.34 | 0.96703 | 37190 P | -1.01  | 49.48 | 0.83258 | 11481 |
| Aurka         | A_51_P150912 | NM_011497    | aurora kinase A                              | -1.038 | 79.26 | 0.93727 | 34370 P | 1.032  | 30.75 | 0.47319 | 8229  |
| Fkbp          | A_51_P259879 | NM_173430    | fukutin related protein                      | -1.038 | 81.02 | 0.9493  | 35354 P | 1.052  | 28.13 | 0.50522 | 8631  |
| Gpaa1         | A_51_P273203 | NM_010331    | GPI anchor attachment protein 1              | -1.038 | 81.02 | 0.95184 | 35725 P | -1.051 | 40.63 | 0.30954 | 6435  |
| Igf2bp2       | A_51_P423308 | NM_008342    | insulin-like growth factor binding protein   | -1.038 | 79.26 | 0.93456 | 34162 P | -1.007 | 49.48 | 0.89368 | 12000 |
| Ube2s         | A_51_P188782 | NM_133777    | ubiquitin-conjugating enzyme E2S             | -1.038 | 81.02 | 0.94976 | 35420 P | -1.166 | 1.62  | 0.02966 | 1180  |
| Usp39         | A_52_P150565 | NM_138592    | ubiquitin specific peptidase 39              | -1.038 | 81.02 | 0.95713 | 36093 P | -1.094 | 19.02 | 0.17322 | 4428  |
| Polr2j        | A_51_P326086 | NM_011293    | polymerase (RNA) II (DNA directed) polyp     | -1.04  | 81.02 | 0.9666  | 37148 P | -1.004 | 49.48 | 0.95699 | 12637 |
| Slc25a1       | A_51_P350922 | NM_153150    | solute carrier family 25 (mitochondrial ca   | -1.04  | 82.34 | 0.97218 | 37720 P | 1.004  | 42.43 | 0.9352  | 12434 |
| Smarcb1       | A_51_P284898 | NM_011418    | SWI/SNF related, matrix associated, actin    | -1.04  | 81.02 | 0.95122 | 35574 P | -1.075 | 16.2  | 0.11714 | 3423  |
| Txn1          | A_51_P424499 | NM_011660    | thioredoxin 1                                | -1.04  | 75.14 | 0.96004 | 33537 P | -1.056 | 42.43 | 0.45574 | 8054  |
| 2810453I06Rik | A_52_P652878 | NM_026050    | RIKEN cDNA 2810453I06 gene                   | -1.041 | 81.02 | 0.9493  | 35372 P | 1.137  | 5.75  | 0.04332 | 1623  |
| 5430432M24Rik | A_52_P684050 | NM_028666    | RIKEN cDNA 5430432M24 gene                   | -1.041 | 81.02 | 0.96091 | 36462 P | 1.134  | 9.71  | 0.14826 | 4012  |
| Btbd12        | A_51_P490296 | NM_177472    | BTB (POZ) domain containing 12               | -1.041 | 81.02 | 0.95129 | 35601 P | 1.025  | 33.49 | 0.551   | 9041  |
| Myoc          | A_51_P375558 | NM_010865    | myocilin                                     | -1.041 | 81.02 | 0.93965 | 34542 M | 1.101  | 8.32  | 0.0728  | 2475  |
| Srm           | A_51_P300709 | NM_009272    | spermidine synthase                          | -1.041 | 81.02 | 0.96573 | 37086 P | -1.048 | 40.63 | 0.30493 | 6385  |

|               |              |              |                                             |        |       |         |         |        |       |         |       |
|---------------|--------------|--------------|---------------------------------------------|--------|-------|---------|---------|--------|-------|---------|-------|
| Tmed9         | A_51_P262878 | NM_026211    | transmembrane emp24 protein transport       | -1.041 | 79.26 | 0.95676 | 25164 M | 1.048  | 25.31 | 0.38611 | 7345  |
| Trpm7         | A_51_P501396 | NM_021450    | transient receptor potential cation chann   | -1.041 | 81.02 | 0.94783 | 35269 P | -1.135 | 9.71  | 0.13857 | 3811  |
| Ube1dc1       | A_51_P403693 | NM_025692    | ubiquitin-activating enzyme E1-domain c     | -1.041 | 81.02 | 0.9516  | 35689 P | -1.056 | 43.15 | 0.51178 | 8689  |
| 1110038F14Rik | A_51_P121447 | NM_054099    | RIKEN cDNA 1110038F14 gene                  | -1.042 | 81.02 | 0.95088 | 35517 P | -1.081 | 30.75 | 0.30108 | 6338  |
| 1700019E19Rik | A_51_P376883 | NM_029601    | RIKEN cDNA 1700019E19 gene                  | -1.042 | 81.02 | 0.9617  | 36599 P | -1.018 | 49.39 | 0.73148 | 10583 |
| Akap11        | A_52_P244964 | XM_001002157 | A kinase (PRKA) anchor protein 11           | -1.042 | 81.02 | 0.95838 | 25245 M | 1.106  | 13.58 | 0.22126 | 5223  |
| Cxcl5         | A_52_P295432 | NM_009141    | chemokine (C-X-C motif) ligand 5            | -1.042 |       | 0.98815 | 26461 A | -1.082 | 30.75 | 0.27226 | 5988  |
| Dkk2          | A_51_P241068 | NM_020265    | dickkopf homolog 2 (Xenopus laevis)         | -1.042 | 81.02 | 0.96335 | 36775 M | 1.223  | 2.53  | 0.02114 | 898   |
| Ext1          | A_51_P416689 | NM_010162    | exostoses (multiple) 1                      | -1.042 | 79.26 | 0.92159 | 33167 P | 1.062  | 16.2  | 0.20651 | 4991  |
| Haghl         | A_51_P292073 | NM_026897    | hydroxyacylglutathione hydrolase-like       | -1.042 | 81.02 | 0.95799 | 36196 P | 1.045  | 33.49 | 0.66607 | 10010 |
| Hdac5         | A_51_P278893 | NM_001077696 | histone deacetylase 5                       | -1.042 | 81.02 | 0.94729 | 35205 P | -1.139 | 4.63  | 0.06694 | 2342  |
| Id3           | A_51_P380178 | NM_008321    | inhibitor of DNA binding 3                  | -1.042 | 81.02 | 0.96489 | 36907 P | -1.005 | 49.48 | 0.9227  | 12294 |
| Lrfn4         | A_51_P467953 | NM_153388    | leucine rich repeat and fibronectin type II | -1.042 | 82.34 | 0.97719 | 38212 P | -1.235 | 0.51  | 0.00802 | 294   |
| Myl6          | A_51_P243727 | NM_010860    | myosin, light polypeptide 6, alkali, smooth | -1.042 | 77.44 | 0.94912 | 24812 M | -1.087 | 19.02 | 0.14717 | 3984  |
| Srebfl1       | A_51_P401921 | NM_011480    | sterol regulatory element binding factor 1  | -1.042 | 82.34 | 0.96814 | 37320 P | -1.03  | 46.85 | 0.60107 | 9462  |
| Ap4s1         | A_51_P198273 | NM_021710    | adaptor-related protein complex AP-4, sig   | -1.043 | 81.02 | 0.93953 | 34527 P | -1.138 | 3.01  | 0.03728 | 1417  |
| BC051227      | A_51_P483311 | NM_183170    | cDNA sequence BC051227                      | -1.043 | 81.02 | 0.95392 | 35825 P | -1.293 | 1.18  | 0.06177 | 2185  |
| Epn1          | A_52_P323074 | NM_010147    | epsin 1                                     | -1.043 | 77.44 | 0.93023 | 29037 M | 1.105  | 6.98  | 0.05545 | 2021  |
| Ggnbp2        | A_51_P225630 | NM_153144    | gametogenetin binding protein 2             | -1.043 | 79.26 | 0.93771 | 34397 P | 1.146  | 3.82  | 0.03237 | 1270  |
| Mlf2          | A_51_P361563 | NM_145385    | myeloid leukemia factor 2                   | -1.043 | 81.02 | 0.94751 | 35226 P | 1.142  | 9.71  | 0.18428 | 4645  |
| Yaf2          | A_51_P292754 | NM_024189    | YY1 associated factor 2                     | -1.043 | 81.02 | 0.93874 | 34494 P | 1.034  | 30.75 | 0.42824 | 7802  |
| 4930404N11Rik | A_51_P279898 | AK008872     | RIKEN cDNA 4930404N11 gene                  | -1.044 | 72.2  | 0.96115 | 25237 M | 1.037  | 28.13 | 0.38996 | 7395  |
| AA407659      | A_52_P205789 | NM_175352    | expressed sequence AA407659                 | -1.044 | 77.44 | 0.909   | 31780 P | -1.025 | 47.43 | 0.61332 | 9553  |
| Dcps          | A_51_P275953 | NM_027030    | decapping enzyme, scavenger                 | -1.044 | 79.26 | 0.93724 | 34362 P | 1.018  | 40.63 | 0.71063 | 10406 |
| Ddx47         | A_51_P491470 | NM_026360    | DEAD (Asp-Glu-Ala-Asp) box polypeptide      | -1.044 | 81.02 | 0.94506 | 35023 P | 1.073  | 16.2  | 0.23295 | 5396  |
| Fnta          | A_51_P112116 | NM_008033    | farnesyltransferase, CAAX box, alpha        | -1.044 | 79.26 | 0.93087 | 33911 P | 1.134  | 5.75  | 0.04387 | 1643  |
| Rkhd1         | A_52_P568165 | NM_198615    | ring finger (C3HC4 type) and KH domain c    | -1.044 | 79.26 | 0.92592 | 33526 P | -1.18  | 1.58  | 0.02091 | 1172  |
| Wnt7b         | A_52_P231691 | NM_009528    | wingless-related MMTV integration site 7    | -1.044 | 77.44 | 0.91079 | 32019 P | 1.099  | 11.33 | 0.14687 | 3979  |
| 2210409B22Rik | A_52_P281747 | AK151977     | solute carrier family 44, member 1          | -1.045 | 79.26 | 0.92446 | 33410 P | 1.029  | 38.4  | 0.72867 | 10561 |
| Cmas          | A_51_P343309 | NM_009908    | cytidine monophospho-N-acetylneuramin       | -1.045 | 79.26 | 0.93771 | 34395 P | -1.058 | 42.43 | 0.44002 | 7925  |
| Irf7          | A_51_P421876 | NM_016850    | interferon regulatory factor 7              | -1.045 | 81.02 | 0.94234 | 34740 P | 1.111  | 6.98  | 0.05028 | 1862  |
| Pdxdp         | A_52_P609120 | NM_020271    | pyridoxal (pyridoxine, vitamin B6) phosph   | -1.045 | 81.02 | 0.95043 | 35457 P | 1.075  | 13.58 | 0.16382 | 4281  |
| Polr2d        | A_51_P419571 | NM_027101    | polymerase (RNA) II (DNA directed) polyp    | -1.045 | 81.02 | 0.9493  | 35394 P | -1.016 | 49.48 | 0.88843 | 11947 |
| Prx           | A_52_P315837 | NM_019412    | periaxin                                    | -1.045 | 75.14 | 0.90625 | 31523 P | -1.123 | 4.63  | 0.04938 | 1824  |
| Trim33        | A_51_P478279 | NM_053170    | tripartite motif protein 33                 | -1.045 | 77.44 | 0.91354 | 32384 P | -1.267 | 0.51  | 0.0067  | 204   |
| Ube2g1        | A_52_P626232 | NM_025985    | ubiquitin-conjugating enzyme E2G 1 (UBC     | -1.045 | 79.26 | 0.93633 | 34297 P | -1.107 | 36.07 | 0.37664 | 7238  |
| 2310022A10Rik | A_51_P507172 | NM_175107    | RIKEN cDNA 2310022A10 gene                  | -1.046 | 81.02 | 0.96078 | 36457 P | 1.107  | 9.71  | 0.10041 | 3113  |
| Arpc1a        | A_51_P191586 | NM_019767    | actin related protein 2/3 complex, subuni   | -1.046 | 77.44 | 0.90634 | 31532 P | -1.062 | 30.75 | 0.21221 | 5076  |
| Banf1         | A_51_P314019 | NM_001038231 | barrier to autointegration factor 1         | -1.046 | 81.02 | 0.95839 | 36239 P | 1.009  | 42.43 | 0.9227  | 12297 |
| Gpr56         | A_52_P317393 | NM_018882    | G protein-coupled receptor 56               | -1.046 | 77.44 | 0.96798 | 31262 P | 1.116  | 8.32  | 0.09171 | 2938  |
| Npat          | A_51_P463784 | XM_146900    | nuclear protein in the AT region            | -1.046 | 81.02 | 0.9503  | 35446 P | -1.004 | 49.48 | 0.94882 | 12570 |
| Pcnp          | A_51_P210877 | NM_001024622 | PEST proteolytic signal containing nuclear  | -1.046 | 79.26 | 0.9493  | 24831 M | 1.093  | 22.1  | 0.49651 | 8533  |
| Zfp623        | A_51_P162760 | NM_030199    | zinc finger protein 623                     | -1.046 | 81.02 | 0.95158 | 35670 P | 1.02   | 36.07 | 0.82493 | 10285 |
| Arf5          | A_51_P381801 | NM_007480    | ADP-ribosylation factor 5                   | -1.047 | 77.44 | 0.91045 | 31997 P | 1.092  | 11.33 | 0.13414 | 3750  |
| Entpd7        | A_52_P297741 | NM_053103    | ectonucleoside triphosphate diphosphoh      | -1.047 | 79.26 | 0.92948 | 33720 P | -1.148 | 3.01  | 0.03793 | 1438  |
| Ifitm3        | A_51_P128876 | NM_025378    | interferon induced transmembrane prote      | -1.047 | 81.02 | 0.94841 | 35290 P | 1.061  | 28.13 | 0.59991 | 9448  |
| Mtmr6         | A_51_P205481 | NM_144843    | myotubularin related protein 6              | -1.047 | 79.26 | 0.92949 | 26800 M | -1.144 | 13.58 | 0.22891 | 5341  |
| Ogfr          | A_52_P272217 | NM_031373    | opioid growth factor receptor               | -1.047 | 79.26 | 0.91949 | 32984 P | -1.06  | 33.49 | 0.24127 | 5519  |
| Pacs1         | A_52_P417620 | NM_153129    | phosphofurin acidic cluster sorting protei  | -1.047 | 81.02 | 0.9617  | 36621 P | 1.019  | 38.4  | 0.67146 | 10065 |
| Pdia5         | A_52_P297642 | NM_028295    | protein disulfide isomerase associated 5    | -1.047 | 81.02 | 0.95123 | 35582 P | -1.001 | 49.48 | 0.98918 | 12976 |
| Tars          | A_51_P479052 | NM_033074    | threonyl-tRNA synthetase                    | -1.047 | 79.26 | 0.91813 | 32837 P | 1.064  | 16.2  | 0.16799 | 4338  |
| D14Ertd449e   | A_51_P222453 | NM_025311    | DNA segment, Chr 14, ERATO Doi 449, exp     | -1.048 | 81.02 | 0.95676 | 36068 P | 1.055  | 22.1  | 0.32456 | 6612  |
| Phlda1        | A_51_P195958 | NM_009344    | pleckstrin homology-like domain, family A   | -1.048 | 81.02 | 0.968   | 37315 P | 1.208  | 6.98  | 0.16996 | 4382  |

|               |              |              |                                             |        |       |         |         |        |       |         |       |
|---------------|--------------|--------------|---------------------------------------------|--------|-------|---------|---------|--------|-------|---------|-------|
| Taf12         | A_51_P202014 | NM_025579    | TAF12 RNA polymerase II, TATA box bindin    | -1.048 | 81.02 | 0.94386 | 34920 P | 1.067  | 28.13 | 0.56114 | 9119  |
| Arl2bp        | A_51_P396752 | NM_024191    | ADP-ribosylation factor-like 2 binding pro  | -1.049 | 77.44 | 0.90638 | 31534 P | 1.079  | 16.2  | 0.26234 | 5845  |
| Ifngr1        | A_51_P391445 | NM_010511    | interferon gamma receptor 1                 | -1.049 | 79.26 | 0.95262 | 24987 M | 1.053  | 28.13 | 0.46065 | 8113  |
| Jmjd3         | A_51_P122017 | NM_001017426 | jumonji domain containing 3                 | -1.049 |       | 0.93495 | 26957 A | 1.104  | 5.75  | 0.05215 | 1924  |
| Lrch4         | A_52_P38964  | AK131167     | mSin3A-binding protein                      | -1.049 | 81.02 | 0.96634 | 37133 P | 1      | 42.43 | 0.99863 | 13042 |
| Acat1         | A_51_P319449 | NM_144784    | acetyl-Coenzyme A acetyltransferase 1       | -1.05  | 79.26 | 0.93757 | 34387 P | -1.051 | 42.43 | 0.40041 | 7519  |
| Arhgdia       | A_52_P419405 | NM_133796    | Rho GDP dissociation inhibitor (GDI) alph   | -1.05  | 81.02 | 0.96143 | 36511 P | -1.044 | 43.75 | 0.45157 | 8010  |
| Bccip         | A_51_P443475 | NM_025392    | BRCA2 and CDKN1A interacting protein        | -1.05  | 79.26 | 0.91841 | 32876 P | 1.027  | 36.07 | 0.6737  | 10085 |
| Bsg           | A_51_P329441 | NM_009768    | basigin                                     | -1.05  | 79.26 | 0.91577 | 32664 P | -1.191 | 1.18  | 0.01749 | 748   |
| Itna          | A_51_P147987 | NM_010584    | intelectin a                                | -1.05  | 83.95 | 0.99427 | 35590 P | 1.056  | 22.1  | 0.28574 | 6165  |
| Mrpl12        | A_51_P143142 | NM_027204    | mitochondrial ribosomal protein L12         | -1.05  | 77.44 | 0.89437 | 30614 P | -1.039 | 44.4  | 0.49414 | 8488  |
| Mrpl37        | A_51_P256304 | NM_025500    | mitochondrial ribosomal protein L37         | -1.05  | 77.44 | 0.90445 | 31388 P | -1.121 | 11.33 | 0.14657 | 3976  |
| Mrpl53        | A_51_P385635 | NM_026744    | mitochondrial ribosomal protein L53         | -1.05  | 79.26 | 0.91144 | 32104 P | 1.031  | 30.75 | 0.47895 | 8300  |
| Pnrc2         | A_51_P225506 | NM_026383    | proline-rich nuclear coactivator            | -1.05  | 81.02 | 0.96876 | 25706 M | 1.123  | 13.58 | 0.28325 | 6123  |
| Tacstd2       | A_51_P257938 | NM_020047    | tumor-associated calcium signal transduc    | -1.05  | 77.44 | 0.90804 | 31674 P | 1.067  | 16.2  | 0.21165 | 5063  |
| 2010004M13Rik | A_51_P333831 | AK008102     | RIKEN cDNA 2010004M13 gene                  | -1.052 | 79.26 | 0.93291 | 34021 P | -1.078 | 22.1  | 0.15924 | 4199  |
| Adcy8         | A_51_P303061 | NM_009623    | adenylate cyclase 8                         | -1.052 | 77.44 | 0.9138  | 28013 M | 1.051  | 33.49 | 0.70826 | 10392 |
| D11Bwg0434e   | A_51_P127915 | NM_173742    | DNA segment, Chr 11, Brigham & Womer        | -1.052 | 81.02 | 0.95569 | 25087 M | -1.061 | 33.49 | 0.24666 | 5601  |
| Ehd4          | A_51_P455807 | NM_133838    | EH-domain containing 4                      | -1.052 | 79.26 | 0.91813 | 32842 P | -1.073 | 28.13 | 0.21936 | 5198  |
| Rfc2          | A_52_P981680 | NM_020022    | replication factor C (activator 1) 2        | -1.052 | 79.26 | 0.9353  | 34216 P | 1.055  | 22.1  | 0.29293 | 6253  |
| Rhog          | A_52_P263068 | NM_019566    | ras homolog gene family, member G           | -1.052 | 81.02 | 0.94783 | 35254 P | 1.064  | 13.58 | 0.16269 | 4267  |
| Stub1         | A_51_P101635 | NM_019719    | STIP1 homology and U-Box containing pro     | -1.052 | 79.26 | 0.91249 | 32259 P | -1.126 | 11.33 | 0.16273 | 4269  |
| Tm9sf4        | A_52_P198993 | NM_133847    | transmembrane 9 superfamily protein me      | -1.052 | 81.02 | 0.95728 | 36110 P | 1.105  | 8.32  | 0.06325 | 2237  |
| 2410004B18Rik | A_51_P325592 | NM_025555    | RIKEN cDNA 2410004B18 gene                  | -1.053 | 79.26 | 0.91363 | 32393 P | 1.038  | 30.75 | 0.52265 | 8774  |
| 2510012J08Rik | A_52_P482849 | XM_618787    | RIKEN cDNA 2510012J08 gene                  | -1.053 | 77.44 | 0.9078  | 31615 P | 1.088  | 9.71  | 0.08255 | 2714  |
| 4930570C03Rik | A_52_P528505 | NM_026353    | RIKEN cDNA 4930570C03 gene                  | -1.053 | 79.26 | 0.90919 | 31810 P | -1.053 | 36.07 | 0.2418  | 5527  |
| Edg3          | A_51_P137523 | NM_010101    | endothelial differentiation, sphingolipid C | -1.053 | 77.44 | 0.91462 | 30180 M | -1.03  | 48.7  | 0.79126 | 11102 |
| Golga7        | A_51_P478942 | NM_020585    | golgi autoantigen, golgin subfamily a, 7    | -1.053 | 77.44 | 0.90577 | 31493 P | -1.118 | 9.71  | 0.11507 | 3380  |
| Guca1a        | A_51_P207751 | NM_008189    | guanylate cyclase activator 1a (retina)     | -1.053 | 79.26 | 0.90966 | 31907 P | 1.005  | 42.43 | 0.93138 | 12399 |
| H1f0          | A_52_P550932 | NM_008197    | H1 histone family, member 0                 | -1.053 | 79.26 | 0.9207  | 33109 P | 1.083  | 16.2  | 0.24738 | 5608  |
| Hnrph1        | A_51_P299195 | NM_021510    | heterogeneous nuclear ribonucleoprotein     | -1.053 | 79.26 | 0.91249 | 32248 P | 1.11   | 11.33 | 0.21523 | 5126  |
| Mark2         | A_51_P414779 | NM_007928    | MAP/microtubule affinity-regulating kina    | -1.053 | 77.44 | 0.90331 | 31280 P | 1.004  | 42.43 | 0.94788 | 12564 |
| 3300001P08Rik | A_51_P133737 | NM_026313    | RIKEN cDNA 3300001P08 gene                  | -1.054 | 81.02 | 0.96731 | 25657 M | 1.159  | 8.32  | 0.14256 | 3895  |
| Dvl2          | A_51_P113106 | NM_007888    | dishevelled 2, dsh homolog (Drosophila)     | -1.054 | 79.26 | 0.93874 | 34487 P | 1.075  | 19.02 | 0.28325 | 6124  |
| Gpr81         | A_51_P294059 | NM_175520    | G protein-coupled receptor 81               | -1.054 | 77.44 | 0.89924 | 30945 P | 1.013  | 42.43 | 0.80819 | 11257 |
| Ilkap         | A_52_P464193 | NM_023343    | integrin-linked kinase-associated serine/t  | -1.054 | 77.44 | 0.89324 | 30515 P | 1.004  | 42.43 | 0.9532  | 12608 |
| Pdlim3        | A_52_P579531 | NM_016798    | PDZ and LIM domain 3                        | -1.054 | 77.44 | 0.89651 | 30745 P | 1.013  | 42.43 | 0.82045 | 11363 |
| Per1          | A_52_P79889  | NM_011065    | period homolog 1 (Drosophila)               | -1.054 | 82.34 | 0.9703  | 37431 P | -1.025 | 47.43 | 0.62776 | 9696  |
| Trf           | A_51_P362638 | NM_133977    | transferrin                                 | -1.054 | 81.02 | 0.96115 | 36489 P | 1.006  | 42.43 | 0.9231  | 12320 |
| Zfp263        | A_51_P272360 | NM_148924    | zinc finger protein 263                     | -1.054 | 79.26 | 0.92446 | 33405 P | 1.087  | 19.02 | 0.44179 | 7935  |
| Add3          | A_51_P223144 | NM_013758    | adducin 3 (gamma)                           | -1.055 | 75.14 | 0.88417 | 29920 P | 1.064  | 22.1  | 0.38233 | 7308  |
| Casp1         | A_51_P142861 | NM_009807    | caspase 1                                   | -1.055 | 83.36 | 0.98883 | 39814 P | 1.087  | 13.58 | 0.16632 | 4324  |
| Hoxa7         | A_51_P509263 | NM_010455    | homeo box A7                                | -1.055 | 81.02 | 0.95055 | 35483 P | 1.115  | 8.32  | 0.08344 | 2736  |
| Igfbp7        | A_51_P472292 | NM_008048    | insulin-like growth factor binding protein  | -1.055 | 77.44 | 0.9057  | 31488 P | -1.348 | 0.51  | 0.00584 | 105   |
| Mmp24         | A_51_P450376 | AJ010262     | matrix metalloproteinase 24                 | -1.055 | 77.44 | 0.89176 | 28465 M | -1.155 | 3.46  | 0.05456 | 1994  |
| Rai12         | A_51_P127777 | NM_018740    | retinoic acid induced 12                    | -1.055 | 79.26 | 0.93621 | 34291 P | 1.058  | 22.1  | 0.29246 | 6245  |
| Slc33a1       | A_52_P551903 | NM_015728    | solute carrier family 33 (acetyl-CoA transp | -1.055 | 79.26 | 0.90873 | 31754 P | 1.038  | 28.13 | 0.39224 | 7423  |
| Slc39a7       | A_51_P174016 | NM_008202    | solute carrier family 39 (zinc transporter) | -1.055 | 69.29 | 0.94635 | 27564 M | 1.045  | 30.75 | 0.50433 | 8625  |
| Alox12b       | A_52_P316765 | NM_009659    | arachidonate 12-lipoxygenase, 12R type      | -1.056 |       | 0.95466 | 21937 A | 1.058  | 25.31 | 0.48382 | 8375  |
| Argef1        | A_52_P513439 | XM_975420    | ADP-ribosylation factor guanine nucleotic   | -1.056 | 79.26 | 0.91409 | 32427 P | 1.33   | 0.75  | 0.00932 | 340   |
| Dpysl3        | A_51_P115441 | NM_009468    | dihydropyrimidinase-like 3                  | -1.056 | 81.02 | 0.96956 | 37375 P | -1.213 | 0.75  | 0.0122  | 492   |
| Pitpna        | A_51_P466371 | NM_008850    | phosphatidylinositol transfer protein, alp  | -1.056 | 77.44 | 0.90087 | 31034 P | 1.046  | 28.13 | 0.47406 | 8235  |
| Ranbp1        | A_51_P142465 | NM_011239    | RAN binding protein 1                       | -1.056 | 77.44 | 0.93023 | 24084 M | 1.017  | 40.63 | 0.76551 | 10898 |

|               |              |           |                                              |        |       |         |         |        |       |         |       |
|---------------|--------------|-----------|----------------------------------------------|--------|-------|---------|---------|--------|-------|---------|-------|
| Trim23        | A_51_P333292 | NM_030731 | tripartite motif protein 23                  | -1.056 | 79.26 | 0.91716 | 32741 P | 1.083  | 13.58 | 0.13993 | 3854  |
| Zfpm1         | A_51_P360840 | NM_009569 | zinc finger protein, multitype 1             | -1.056 | 81.02 | 0.96155 | 36524 P | 1.103  | 9.71  | 0.10957 | 3255  |
| Aadacl1       | A_51_P369862 | NM_178772 | arylacetamide deacetylase-like 1             | -1.057 | 79.26 | 0.90488 | 29423 P | 1.022  | 38.4  | 0.67763 | 10115 |
| Arhgap21      | A_51_P481418 | BC076629  | Rho GTPase activating protein 21             | -1.057 | 77.44 | 0.88709 | 30098 P | 1.025  | 38.4  | 0.71415 | 10439 |
| Csnk1d        | A_51_P359813 | NM_027874 | casein kinase 1, delta                       | -1.057 | 79.26 | 0.92091 | 33130 P | 1.072  | 22.1  | 0.37192 | 7195  |
| Prkab1        | A_52_P505346 | NM_031869 | protein kinase, AMP-activated, beta 1 non    | -1.057 | 75.14 | 0.87124 | 29005 P | 1.084  | 13.58 | 0.18233 | 4615  |
| Rxrg          | A_51_P513311 | NM_009107 | retinoid X receptor gamma                    | -1.057 | 81.02 | 0.95921 | 33474 P | -1.325 | 0.51  | 0.00654 | 189   |
| O610007P14Rik | A_51_P400375 | NM_021446 | RIKEN cDNA O610007P14 gene                   | -1.058 | 79.26 | 0.93596 | 24313 M | -1.075 | 43.15 | 0.58699 | 9315  |
| Chchd4        | A_51_P254234 | NM_133928 | coiled-coil-helix-coiled-coil-helix domain c | -1.058 | 77.44 | 0.90781 | 31630 P | -1.149 | 3.01  | 0.04289 | 1613  |
| Fance         | A_51_P476851 | AK172283  | Fanconi anemia, complementation group        | -1.058 | 77.44 | 0.90474 | 31420 P | -1.081 | 25.31 | 0.18289 | 4623  |
| Kif20a        | A_51_P133137 | NM_009004 | kinesin family member 20A                    | -1.058 | 77.44 | 0.90285 | 31245 P | 1.064  | 19.02 | 0.2458  | 5581  |
| Prkci         | A_51_P406671 | NM_008857 | protein kinase C, iota                       | -1.058 | 77.44 | 0.89303 | 30502 P | 1.064  | 25.31 | 0.49414 | 8487  |
| Sfrs9         | A_51_P336691 | NM_025573 | splicing factor, arginine/serine rich 9      | -1.058 | 77.44 | 0.90234 | 31211 P | 1.112  | 9.71  | 0.12384 | 3577  |
| Tubg1         | A_51_P499864 | NM_134024 | tubulin, gamma 1                             | -1.058 | 77.44 | 0.905   | 31433 P | 1.074  | 13.58 | 0.15044 | 4044  |
| Zfp275        | A_51_P286792 | NM_031494 | zinc finger protein 275                      | -1.058 | 75.14 | 0.9     | 27175 P | 1.075  | 19.02 | 0.3303  | 6672  |
| Adfp          | A_51_P258150 | NM_007408 | adipose differentiation related protein      | -1.059 | 77.44 | 0.90653 | 31552 P | -1.021 | 49    | 0.71493 | 10441 |
| Cideb         | A_52_P512365 | NM_009894 | cell death-inducing DNA fragmentation fa     | -1.059 | 81.02 | 0.95073 | 35508 P | 1.078  | 16.2  | 0.19554 | 4830  |
| Foxh1         | A_51_P203138 | NM_007989 | forkhead box H1                              | -1.059 | 77.44 | 0.90633 | 31529 P | 1.131  | 4.63  | 0.09718 | 2771  |
| Grasp         | A_51_P425642 | NM_019518 | GRP1 (general receptor for phosphoinosit     | -1.059 | 79.26 | 0.9348  | 34175 P | 1.034  | 28.13 | 0.42446 | 7773  |
| Il4i1         | A_52_P410449 | NM_010215 | interleukin 4 induced 1                      | -1.059 | 79.26 | 0.91605 | 32697 P | -1.325 | 0.51  | 0.00584 | 75    |
| Sf3a3         | A_51_P297165 | BC092058  | splicing factor 3a, subunit 3                | -1.059 | 77.44 | 0.888   | 30142 P | -1.04  | 43.75 | 0.45157 | 8008  |
| 2210412D01Rik | A_51_P293059 | NM_133722 | RIKEN cDNA 2210412D01 gene                   | -1.06  | 79.26 | 0.90183 | 29165 P | -1.032 | 46.3  | 0.60769 | 9506  |
| 8430406I07Rik | A_51_P187697 | NM_028984 | RIKEN cDNA 8430406I07 gene                   | -1.06  | 79.26 | 0.92592 | 33530 P | -1.16  | 2.04  | 0.03538 | 1371  |
| A630047E20Rik | A_51_P213172 | NM_173032 | RIKEN cDNA A630047E20 gene                   | -1.06  | 77.44 | 0.88349 | 29879 P | -1.269 | 0.51  | 0.00985 | 367   |
| Cdk5rap1      | A_51_P193524 | NM_025876 | CDK5 regulatory subunit associated prote     | -1.06  | 81.02 | 0.9493  | 35370 P | -1.07  | 33.49 | 0.30954 | 6436  |
| Cops6         | A_52_P667177 | NM_012002 | COP9 (constitutive photomorphogenic) h       | -1.06  | 79.26 | 0.92552 | 33514 P | 1.577  | 0.24  | 0.00731 | 264   |
| Fbln5         | A_51_P186703 | AK090129  |                                              | -1.06  | 79.26 | 0.91011 | 31964 P | -1.035 | 49.22 | 0.84081 | 11530 |
| Glud1         | A_51_P376258 | NM_008133 | glutamate dehydrogenase 1                    | -1.06  | 79.26 | 0.9386  | 34451 P | 1.055  | 30.75 | 0.58844 | 9324  |
| Hyal2         | A_51_P284577 | NM_010489 | hyaluronoglucosaminidase 2                   | -1.06  | 75.14 | 0.86744 | 28687 P | -1.032 | 45.68 | 0.5077  | 8657  |
| Rbm5          | A_51_P234025 | NM_148930 | RNA binding motif protein 5                  | -1.06  | 75.14 | 0.86668 | 28633 P | 1.199  | 2.04  | 0.0146  | 620   |
| Sdhb          | A_51_P260871 | NM_025848 | succinate dehydrogenase complex, subun       | -1.06  | 77.44 | 0.8984  | 30850 P | 1.135  | 5.75  | 0.04387 | 1644  |
| Spata13       | A_52_P305279 | AK151394  | spermatogenesis associated 13                | -1.06  | 79.26 | 0.92592 | 33531 P | 1.035  | 30.75 | 0.46843 | 8190  |
| 1810011O16Rik | A_51_P282424 | NM_025456 | E2F-associated phosphoprotein                | -1.062 | 79.26 | 0.93689 | 34333 P | 1.01   | 42.43 | 0.92526 | 12345 |
| Casp2         | A_51_P296448 | NM_007610 | caspase 2                                    | -1.062 | 75.14 | 0.91577 | 23373 M | 1.124  | 6.98  | 0.0585  | 2094  |
| Cdc42ep1      | A_52_P573255 | NM_027219 | CDC42 effector protein (Rho GTPase bind      | -1.062 | 79.26 | 0.91144 | 32101 P | 1.053  | 19.02 | 0.23298 | 5400  |
| Cops3         | A_51_P328014 | NM_011991 | COP9 (constitutive photomorphogenic) h       | -1.062 | 79.26 | 0.91591 | 32674 P | 1.103  | 9.71  | 0.09379 | 2979  |
| Exoc7         | A_51_P273754 | NM_016857 | exocyst complex component 7                  | -1.062 | 77.44 | 0.89919 | 30937 P | -1.087 | 33.49 | 0.38157 | 7292  |
| Foxf2         | A_51_P248865 | NM_010225 | forkhead box F2                              | -1.062 | 81.02 | 0.96778 | 37271 P | 1.057  | 19.02 | 0.22683 | 5312  |
| Tegt          | A_52_P59579  | NM_026669 | testis enhanced gene transcript              | -1.062 | 77.44 | 0.91861 | 23516 M | 1.224  | 2.04  | 0.0155  | 660   |
| AU022870      | A_51_P395293 | NM_177682 | expressed sequence AU022870                  | -1.063 | 75.14 | 0.87393 | 29179 P | 1.008  | 42.43 | 0.9013  | 12107 |
| Dna2l         | A_51_P190425 | AK129051  | DNA2 DNA replication helicase 2-like (yea    | -1.063 | 81.02 | 0.94304 | 34849 P | -1.027 | 47.92 | 0.66534 | 10005 |
| Dnajc12       | A_51_P442284 | NM_013888 | Dnaj (Hsp40) homolog, subfamily C, mem       | -1.063 | 75.14 | 0.8711  | 28985 P | -1.018 | 49.48 | 0.8159  | 11335 |
| Etv4          | A_51_P230382 | NM_008815 | ets variant gene 4 (E1A enhancer binding     | -1.063 | 77.44 | 0.88378 | 29896 P | -1.069 | 28.13 | 0.20244 | 4936  |
| Gak           | A_51_P176185 | NM_153569 | cyclin G associated kinase                   | -1.063 | 79.26 | 0.93884 | 24434 M | 1.175  | 8.32  | 0.1601  | 4217  |
| Ilf2          | A_51_P200633 | AK161126  | interleukin enhancer binding factor 2        | -1.063 | 79.26 | 0.93938 | 34518 P | 1.087  | 19.02 | 0.37939 | 7273  |
| Rgl2          | A_51_P460890 | NM_009059 | ral guanine nucleotide dissociation stimul   | -1.063 | 79.26 | 0.92283 | 33272 P | 1.026  | 36.07 | 0.61152 | 9545  |
| Timp4         | A_51_P355427 | NM_080639 | tissue inhibitor of metalloproteinase 4      | -1.063 | 72.2  | 0.84699 | 27552 P | -1.003 | 49.48 | 0.94988 | 12588 |
| 2610307O08Rik | A_51_P240801 | BC046640  | RIKEN cDNA 2610307O08 gene                   | -1.064 | 81.02 | 0.94783 | 35267 P | -1.187 | 1.32  | 0.02229 | 940   |
| Casc3         | A_51_P513211 | NM_138660 | cancer susceptibility candidate 3            | -1.064 | 77.44 | 0.89958 | 30967 P | 1.105  | 13.58 | 0.26523 | 5876  |
| D230005D02Rik | A_52_P529374 | NM_172813 | RIKEN cDNA D230005D02 gene                   | -1.064 | 79.26 | 0.92998 | 33788 P | 1.042  | 28.13 | 0.37178 | 7189  |
| Esam1         | A_51_P448325 | NM_027102 | endothelial cell-specific adhesion molecu    | -1.064 | 77.44 | 0.88617 | 30035 P | -1.197 | 1.18  | 0.0196  | 831   |
| Ipo13         | A_51_P365482 | NM_146152 | importin 13                                  | -1.064 | 81.02 | 0.95045 | 35464 P | -1.063 | 36.07 | 0.27555 | 6033  |
| Lipc          | A_51_P263993 | NM_008280 | lipase, hepatic                              | -1.064 | 77.44 | 0.87048 | 27324 M | -1.056 | 42.43 | 0.40357 | 7551  |

|               |              |              |                                              |        |       |         |         |        |       |         |       |
|---------------|--------------|--------------|----------------------------------------------|--------|-------|---------|---------|--------|-------|---------|-------|
| Lrrc20        | A_52_P77204  | NM_153542    | leucine rich repeat containing 20            | -1.064 | 77.44 | 0.887   | 30090 P | 1.134  | 5.75  | 0.04505 | 1676  |
| Ppp1r14b      | A_52_P262883 | NM_008889    | protein phosphatase 1, regulatory (inhibi    | -1.064 | 75.14 | 0.86143 | 28312 P | -1.042 | 42.43 | 0.35648 | 6973  |
| Senp3         | A_52_P574398 | NM_030702    | SUMO/sentrin specific peptidase 3            | -1.064 | 79.26 | 0.91529 | 32606 P | 1.075  | 13.58 | 0.16092 | 4228  |
| Zdhhc4        | A_51_P248381 | NM_028379    | zinc finger, DHHC domain containing 4        | -1.064 | 75.14 | 0.85302 | 27919 P | 1.05   | 28.13 | 0.50017 | 8583  |
| Ebf2          | A_51_P386562 | NM_010095    | early B-cell factor 2                        | -1.065 | 79.26 | 0.95573 | 33182 P | -1.022 | 48.7  | 0.70665 | 10380 |
| Gpr108        | A_51_P185135 | NM_030084    | G protein-coupled receptor 108               | -1.065 | 75.14 | 0.85763 | 28102 P | -1.056 | 36.07 | 0.26817 | 5924  |
| Lrrk2         | A_51_P290788 | NM_025730    | leucine-rich repeat kinase 2                 | -1.065 | 81.02 | 0.95102 | 35567 P | -1.03  | 45.68 | 0.52201 | 8767  |
| Nudt3         | A_51_P440657 | NM_019837    | nudix (nucleotide diphosphate linked moi     | -1.065 | 77.44 | 0.89826 | 30832 P | 1.11   | 13.58 | 0.2635  | 5864  |
| Pigq          | A_51_P232107 | NM_011822    | phosphatidylinositol glycan anchor biosyr    | -1.065 | 75.14 | 0.84866 | 27652 P | 1.02   | 38.4  | 0.65247 | 9896  |
| Plxnb1        | A_51_P281734 | NM_172775    | plexin B1                                    | -1.065 | 79.26 | 0.92546 | 33490 P | 1.057  | 22.1  | 0.31375 | 6504  |
| Pou2f2        | A_51_P166728 | NM_011138    | POU domain, class 2, transcription factor    | -1.065 | 69.29 | 0.86821 | 25121 M | 1.106  | 8.32  | 0.07038 | 2407  |
| Tcfap2c       | A_51_P418820 | NM_009335    | transcription factor AP-2, gamma             | -1.065 | 81.02 | 0.95609 | 36000 P | -1.044 | 43.15 | 0.39637 | 7484  |
| Topbp1        | A_51_P302651 | NM_176979    | topoisomerase (DNA) II beta binding prot     | -1.065 | 77.44 | 0.89303 | 30501 P | -1.013 | 49.48 | 0.79928 | 11172 |
| 2310037124Rik | A_51_P246146 | NM_133714    | RIKEN cDNA 2310037124 gene                   | -1.066 | 72.2  | 0.85127 | 26012 P | 1.096  | 16.2  | 0.32529 | 6617  |
| Atp6v0d1      | A_51_P361201 | NM_013477    | ATPase, H+ transporting, lysosomal V0 su     | -1.066 | 77.44 | 0.89375 | 30567 P | 1.126  | 8.32  | 0.08819 | 2848  |
| Cdipt         | A_51_P408471 | NM_026638    | CDP-diacylglycerol--inositol 3-phosphatid    | -1.066 | 79.26 | 0.9312  | 24127 M | 1.025  | 36.07 | 0.61141 | 9544  |
| Eif2b4        | A_52_P425589 | NM_010122    | eukaryotic translation initiation factor 2B, | -1.066 | 75.14 | 0.85944 | 28206 P | -1.108 | 13.58 | 0.15344 | 4101  |
| Golga2        | A_51_P326609 | BC011407     | golgi autoantigen, golgin subfamily a, 2     | -1.066 | 79.26 | 0.9118  | 32172 P | 1.008  | 42.43 | 0.86391 | 11717 |
| ldh3b         | A_51_P130110 | NM_130884    | isocitrate dehydrogenase 3 (NAD+) beta       | -1.066 | 75.14 | 0.86575 | 28556 P | 1.031  | 36.07 | 0.63605 | 9770  |
| Nol1          | A_51_P258078 | NM_138747    | nucleolar protein 1                          | -1.066 | 81.02 | 0.94613 | 35085 P | -1.15  | 3.46  | 0.05135 | 1886  |
| Nr6a1         | A_52_P122664 | NM_010264    | nuclear receptor subfamily 6, group A, m     | -1.066 | 79.26 | 0.91504 | 32498 P | -1.169 | 2.53  | 0.04772 | 1782  |
| Pex11b        | A_52_P666257 | NM_011069    | peroxisomal biogenesis factor 11b            | -1.066 | 77.44 | 0.92701 | 23925 M | 1.072  | 19.02 | 0.2865  | 6181  |
| Ppp2r1a       | A_51_P365578 | NM_016891    | protein phosphatase 2 (formerly 2A), regu    | -1.066 | 69.29 | 0.83525 | 26715 P | 1.117  | 9.71  | 0.12758 | 3654  |
| Rarsl         | A_51_P422781 | NM_181406    | arginyl-tRNA synthetase 2, mitochondrial     | -1.066 | 79.26 | 0.90935 | 31834 P | -1.15  | 3.01  | 0.04376 | 1636  |
| BC003993      | A_51_P327642 | NM_030560    | cDNA sequence BC003993                       | -1.067 | 72.2  | 0.83927 | 27063 P | 1.127  | 9.71  | 0.12865 | 3672  |
| Cno           | A_51_P390522 | NM_133724    | cappuccino                                   | -1.067 | 81.02 | 0.94281 | 34782 P | 1.013  | 42.43 | 0.79225 | 11115 |
| Kifc3         | A_52_P10195  | NM_010631    | kinesin family member C3                     | -1.067 | 69.29 | 0.83164 | 26185 P | -1.113 | 8.32  | 0.08301 | 2728  |
| Maged2        | A_51_P121635 | NM_030700    | melanoma antigen, family D, 2                | -1.067 | 77.44 | 0.88971 | 30230 P | 1.051  | 22.1  | 0.30204 | 6341  |
| S100a13       | A_51_P269852 | NM_009113    | S100 calcium binding protein A13             | -1.067 | 79.26 | 0.92998 | 33786 P | 1.04   | 30.75 | 0.47947 | 8305  |
| Zfp637        | A_51_P123795 | NM_177684    | zinc finger protein 637                      | -1.067 | 77.44 | 0.88688 | 30079 P | -1.026 | 45.05 | 0.66255 | 9237  |
| 4930453N24Rik | A_51_P311621 | AK002578     | RIKEN cDNA 4930453N24 gene                   | -1.068 | 77.44 | 0.9036  | 31334 P | -1.071 | 30.75 | 0.25067 | 5652  |
| Arhgap8       | A_52_P145482 | NM_146061    | Rho GTPase activating protein 8              | -1.068 | 75.14 | 0.8701  | 28893 M | -1.187 | 3.01  | 0.07543 | 2549  |
| D10Wsu102e    | A_52_P140663 | NM_026579    | DNA segment, Chr 10, Wayne State Unive       | -1.068 | 81.02 | 0.95755 | 36147 P | -1.041 | 44.4  | 0.48193 | 8337  |
| Glis3         | A_52_P546200 | NM_175459    | GLIS family zinc finger 3                    | -1.068 | 79.26 | 0.92982 | 33738 M | 1.081  | 11.33 | 0.0996  | 3096  |
| Hiat1         | A_52_P49827  | AK041662     | hippocampus abundant gene transcript 1       | -1.068 | 77.44 | 0.90436 | 27430 M | -1.044 | 42.43 | 0.35507 | 6958  |
| Nit1          | A_52_P322467 | AK032189     | nitrilase 1                                  | -1.068 | 79.26 | 0.915   | 32490 P | 1.02   | 38.4  | 0.65609 | 9934  |
| Lims1         | A_52_P222725 | NM_026148    | LIM and senescent cell antigen-like doma     | -1.07  | 77.44 | 0.88236 | 29823 P | 1.168  | 9.71  | 0.24127 | 5516  |
| Lrig2         | A_52_P228491 | NM_001025067 | leucine-rich repeats and immunoglobulin      | -1.07  | 75.14 | 0.84373 | 27326 P | -1.139 | 2.53  | 0.0338  | 1309  |
| Med19         | A_51_P172842 | NM_025885    | mediator of RNA polymerase II transcripti    | -1.07  | 75.14 | 0.84866 | 27656 P | -1.095 | 16.2  | 0.14403 | 3923  |
| Ppan          | A_51_P189985 | NM_145610    | peter pan homolog (Drosophila)               | -1.07  | 79.26 | 0.93874 | 34471 P | -1.039 | 45.05 | 0.52508 | 8797  |
| Pura          | A_51_P155574 | NM_008989    | purine rich element binding protein A        | -1.07  | 77.44 | 0.89061 | 30275 P | -1.066 | 33.49 | 0.28622 | 6175  |
| Rap2c         | A_51_P189425 | NM_172413    | RAP2C, member of RAS oncogene family         | -1.07  | 75.14 | 0.85102 | 27785 P | 1.081  | 11.33 | 0.11852 | 3449  |
| Siah1a        | A_52_P343641 | NM_009172    | seven in absentia 1A                         | -1.07  | 72.2  | 0.82935 | 25996 P | 1.001  | 42.43 | 0.97964 | 12839 |
| Smad7         | A_51_P403636 | NM_001042660 | MAD homolog 7 (Drosophila)                   | -1.07  | 75.14 | 0.85886 | 28154 P | 1.103  | 11.33 | 0.13666 | 3782  |
| Snx1          | A_51_P159673 | NM_019727    | sorting nexin 1                              | -1.07  | 77.44 | 0.88438 | 29933 P | -1.07  | 30.75 | 0.23044 | 5358  |
| Suv420h2      | A_51_P253094 | NM_146177    | suppressor of variegation 4-20 homolog 2     | -1.07  | 77.44 | 0.87678 | 29377 P | 1.021  | 38.4  | 0.68976 | 10237 |
| Tubgcp2       | A_51_P226932 | NM_133755    | tubulin, gamma complex associated prote      | -1.07  | 77.44 | 0.90191 | 31174 P | 1.05   | 25.31 | 0.36039 | 7028  |
| Wrnip1        | A_51_P432520 | NM_030215    | Werner helicase interacting protein 1        | -1.07  | 75.14 | 0.86527 | 28537 P | -1.218 | 0.92  | 0.01685 | 727   |
| 1500003O22Rik | A_51_P293530 | NM_025897    | RIKEN cDNA 1500003O22 gene                   | -1.071 | 77.44 | 0.90537 | 31469 P | 1.105  | 11.33 | 0.13573 | 3768  |
| Aldh3b1       | A_51_P506356 | NM_026316    | aldehyde dehydrogenase 3 family, memb        | -1.071 | 79.26 | 0.91605 | 32691 P | 1.04   | 28.13 | 0.39761 | 7498  |
| BC018242      | A_51_P427603 | NM_144935    | cDNA sequence BC018242                       | -1.071 | 81.02 | 0.94373 | 34890 P | 1.032  | 33.49 | 0.53617 | 8902  |
| Cdc5l         | A_51_P429046 | NM_152810    | cell division cycle 5-like (S. pombe)        | -1.071 | 77.44 | 0.91818 | 23489 M | 1.045  | 30.75 | 0.51213 | 8692  |
| Dera          | A_51_P512820 | NM_172733    | 2-deoxyribose-5-phosphate aldolase hom       | -1.071 | 81.02 | 0.94613 | 35078 P | -1.034 | 45.68 | 0.58614 | 9307  |



|               |              |              |                                            |        |       |         |         |        |       |         |       |
|---------------|--------------|--------------|--------------------------------------------|--------|-------|---------|---------|--------|-------|---------|-------|
| Fbxo4         | A_51_P490257 | NM_134099    | F-box protein 4                            | -1.071 | 75.14 | 0.86619 | 28573 P | 1.24   | 2.53  | 0.02803 | 1135  |
| Map3k9        | A_51_P300867 | NM_177395    | mitogen-activated protein kinase kinase k  | -1.071 | 81.02 | 0.94778 | 35250 M | 1.077  | 16.2  | 0.20496 | 4965  |
| Nr4a2         | A_52_P494622 | NM_013613    | nuclear receptor subfamily 4, group A, me  | -1.071 | 82.34 | 0.97958 | 38474 P | 1.343  | 1.32  | 0.02005 | 859   |
| Sart1         | A_51_P178124 | NM_016882    | squamous cell carcinoma antigen recogni    | -1.071 | 79.26 | 0.94226 | 34726 P | 1.075  | 13.58 | 0.1464  | 3969  |
| Wbp1          | A_51_P160372 | NM_016757    | WW domain binding protein 1                | -1.071 | 75.14 | 0.85127 | 27825 P | -1.046 | 40.63 | 0.30561 | 6389  |
| Zfp71-rs1     | A_51_P460398 | BC016248     | zinc finger protein 71, related sequence 1 | -1.071 | 77.44 | 0.87802 | 29487 P | -1.086 | 19.02 | 0.14189 | 3882  |
| Zmpste24      | A_52_P483680 | AK079998     | zinc metallopeptidase, STE24 homolog (S    | -1.071 | 79.26 | 0.94234 | 34751 P | 1.08   | 19.02 | 0.31247 | 6484  |
| 2900026A02Rik | A_51_P411728 | NM_172884    | RIKEN cDNA 2900026A02 gene                 | -1.072 | 79.26 | 0.92977 | 33728 P | -1.304 | 0.51  | 0.00707 | 221   |
| Clstn3        | A_51_P114094 | NM_153508    | calsyntenin 3                              | -1.072 | 77.44 | 0.90152 | 31089 P | 1.077  | 11.33 | 0.12604 | 3629  |
| Kctd15        | A_51_P331805 | NM_146188    | potassium channel tetramerisation doma     | -1.072 | 77.44 | 0.90137 | 31072 P | 1.015  | 42.43 | 0.9336  | 12419 |
| Mapre3        | A_52_P278448 | NM_133350    | microtubule-associated protein, RP/EB fa   | -1.072 | 79.26 | 0.93702 | 34345 P | 1.06   | 22.1  | 0.28871 | 6197  |
| Psen2         | A_51_P384033 | NM_011183    | presenilin 2                               | -1.072 | 79.26 | 0.90966 | 31879 P | 1.084  | 13.58 | 0.14633 | 3968  |
| Smyd2         | A_51_P320105 | NM_026796    | SET and MYND domain containing 2           | -1.072 | 79.26 | 0.91601 | 32681 P | -1.122 | 13.58 | 0.1945  | 4812  |
| Tbrg1         | A_51_P186531 | NM_025289    | transforming growth factor beta regulato   | -1.072 | 75.14 | 0.85831 | 28137 P | -1.053 | 42.43 | 0.4311  | 7843  |
| Arpc5         | A_52_P58041  | NM_026369    | actin related protein 2/3 complex, subuni  | -1.073 | 75.14 | 0.86155 | 28329 P | 1.067  | 16.2  | 0.1945  | 4806  |
| Ccrk          | A_52_P48723  | NM_053180    | cell cycle related kinase                  | -1.073 | 79.26 | 0.9186  | 32909 P | -1.032 | 45.05 | 0.49046 | 8445  |
| Chkb          | A_51_P159771 | NM_007692    | choline kinase beta                        | -1.073 | 77.44 | 0.90565 | 31480 P | 1.045  | 33.49 | 0.6704  | 10051 |
| Gemin6        | A_52_P190745 | NM_026053    | gem (nuclear organelle) associated protei  | -1.073 | 79.26 | 0.92364 | 33360 P | -1.043 | 43.75 | 0.43307 | 7872  |
| Med8          | A_51_P376313 | NM_173719    | mediator of RNA polymerase II transcripti  | -1.073 | 79.26 | 0.91949 | 33002 P | 1.049  | 28.13 | 0.42451 | 7776  |
| Tmc4          | A_52_P219415 | NM_181820    | transmembrane channel-like gene family     | -1.073 | 77.44 | 0.89984 | 30975 P | -1.151 | 4.63  | 0.08811 | 2845  |
| 3100004P22Rik | A_51_P202003 | NM_133693    | RIKEN cDNA 3100004P22 gene                 | -1.074 | 79.26 | 0.93304 | 34046 P | -1.048 | 43.75 | 0.49288 | 8476  |
| 6530401D17Rik | A_51_P346815 | NM_029541    | RIKEN cDNA 6530401D17 gene                 | -1.074 | 75.14 | 0.85975 | 28221 P | -1.115 | 6.98  | 0.06385 | 2252  |
| C230069N13    | A_52_P274610 | AK082618     | hypothetical protein C230069N13            | -1.074 |       | 0.9735  | 14679 A | -1.034 | 45.68 | 0.57352 | 9215  |
| Cyp2b9        | A_51_P467076 | NM_010000    | cytochrome P450, family 2, subfamily b, p  | -1.074 |       | 0.9824  | 26250 A | 1.102  | 8.32  | 0.0728  | 2476  |
| D130060J10Rik | A_52_P553408 | AK051620     | RIKEN cDNA D130060J10 gene                 | -1.074 | 69.29 | 0.81296 | 24903 P | 1.025  | 40.63 | 0.81226 | 11300 |
| Hnrpf         | A_51_P305997 | NM_133834    | heterogeneous nuclear ribonucleoprotein    | -1.074 | 69.29 | 0.8833  | 21715 M | 1.137  | 9.71  | 0.17942 | 4558  |
| Katna1        | A_51_P493857 | NM_011835    | katanin p60 (ATPase-containing) subunit /  | -1.074 | 72.2  | 0.82885 | 25965 P | 1.025  | 38.4  | 0.70331 | 10343 |
| Nbr1          | A_51_P248234 | NM_008676    | neighbor of Brca1 gene 1                   | -1.074 | 72.2  | 0.89149 | 22027 M | 1.084  | 13.58 | 0.20155 | 4920  |
| Nup153        | A_51_P455886 | NM_175749    | nucleoporin 153                            | -1.074 | 79.26 | 0.91097 | 32055 P | 1.037  | 33.49 | 0.61927 | 9618  |
| Plvap         | A_51_P414653 | NM_032398    | plasmalemma vesicle associated protein     | -1.074 | 79.26 | 0.91784 | 32771 P | -1.003 | 49.48 | 0.946   | 12552 |
| Ptcd1         | A_52_P227065 | AV132191     | pentatricopeptide repeat domain 1          | -1.074 | 79.26 | 0.94006 | 24468 M | 1.056  | 28.13 | 0.5827  | 9286  |
| Tm7sf2        | A_52_P35064  | NM_028454    | transmembrane 7 superfamily member 2       | -1.074 | 79.26 | 0.92194 | 33192 P | 1.098  | 9.71  | 0.08948 | 2877  |
| Top3b         | A_51_P179082 | NM_011624    | topoisomerase (DNA) III beta               | -1.074 | 77.44 | 0.8965  | 30736 P | -1.2   | 0.92  | 0.01444 | 606   |
| Tpd52l2       | A_51_P125157 | NM_025482    | tumor protein D52-like 2                   | -1.074 | 77.44 | 0.88592 | 30017 P | 1.021  | 40.63 | 0.74332 | 10731 |
| Zcchc10       | A_51_P514675 | NM_026479    | zinc finger, CCHC domain containing 10     | -1.074 | 72.2  | 0.81943 | 25383 P | 1.222  | 2.53  | 0.02206 | 937   |
| 1700052K11Rik | A_51_P134262 | NM_028539    | RIKEN cDNA 1700052K11 gene                 | -1.075 | 77.44 | 0.9053  | 31466 P | -1.022 | 48.39 | 0.66444 | 10000 |
| 2600003E23Rik | A_51_P291210 | NM_027373    | actin filament associated protein 1        | -1.075 | 75.14 | 0.84183 | 27199 P | 1.015  | 42.43 | 0.91804 | 12250 |
| Ctbp1         | A_51_P482023 | NM_013502    | C-terminal binding protein 1               | -1.075 | 79.26 | 0.91171 | 32129 P | -1.037 | 44.4  | 0.46016 | 8098  |
| Hdac1         | A_51_P507380 | U80780       | histone deacetylase 1                      | -1.075 | 79.26 | 0.92701 | 33578 P | 1.068  | 22.1  | 0.43876 | 7911  |
| Mpz           | A_51_P321235 | NM_008623    | myelin protein zero                        | -1.075 | 79.26 | 0.91249 | 32260 P | -1.07  | 30.75 | 0.234   | 5414  |
| Rrm1          | A_51_P502082 | NM_009103    | ribonucleotide reductase M1                | -1.075 | 77.44 | 0.90781 | 31653 P | 1.021  | 38.4  | 0.67264 | 10077 |
| Sumo3         | A_51_P424448 | NM_019929    | SMT3 suppressor of mif two 3 homolog 3     | -1.075 | 72.2  | 0.88895 | 21941 M | -1.071 | 22.1  | 0.13945 | 3840  |
| Waf3f3        | A_51_P320125 | NM_145155    | WAS protein family, member 3               | -1.075 |       | 0.92289 | 20932 A | -1.017 | 49.48 | 0.79133 | 11106 |
| 2610524G07Rik | A_51_P505339 | NM_025596    | PRELI domain containing 1                  | -1.076 | 79.26 | 0.91317 | 32352 P | 1.099  | 11.33 | 0.13462 | 3759  |
| Bnip3         | A_51_P155234 | NM_009760    | BCL2/adenovirus E1B interacting protein    | -1.076 | 75.14 | 0.84866 | 27660 P | 1.002  | 42.43 | 0.96955 | 12742 |
| E430029J22Rik | A_52_P483799 | NM_001033384 | RIKEN cDNA E030037K03 gene                 | -1.076 |       | 0.95861 | 18617 A | 1.08   | 16.2  | 0.25519 | 5732  |
| Mettl1        | A_51_P499103 | NM_010792    | methyltransferase-like 1                   | -1.076 | 77.44 | 0.90346 | 31308 P | -1.05  | 42.43 | 0.3868  | 7360  |
| Rbm4          | A_51_P432802 | NM_009032    | RNA binding motif protein 4                | -1.076 | 75.14 | 0.86859 | 28798 P | 1.148  | 6.98  | 0.07509 | 2537  |
| Slc35a2       | A_51_P162238 | NM_078484    | solute carrier family 35 (UDP-galactose tr | -1.076 | 72.2  | 0.82776 | 25874 P | 1.048  | 28.13 | 0.49605 | 8524  |
| 3930401K13Rik | A_51_P133052 | NM_001079814 | RIKEN cDNA 3930401K13 gene                 | -1.078 | 75.14 | 0.85886 | 28153 P | 1.141  | 5.75  | 0.04508 | 1695  |
| Cd72          | A_52_P14600  | AK144191     | CD72 antigen                               | -1.078 | 77.44 | 0.89949 | 30961 P | -1.059 | 36.07 | 0.25658 | 5760  |
| Erccl1        | A_51_P390397 | NM_007948    | excision repair cross-complementing rode   | -1.078 | 75.14 | 0.86435 | 28467 P | 1.042  | 28.13 | 0.37996 | 7278  |
| Fus           | A_52_P320032 | NM_139149    | fusion, derived from t(12;16) malignant li | -1.078 | 77.44 | 0.88527 | 29983 P | 1.272  | 3.46  | 0.07267 | 2459  |

|               |              |              |                                                             |        |       |         |         |        |       |         |       |
|---------------|--------------|--------------|-------------------------------------------------------------|--------|-------|---------|---------|--------|-------|---------|-------|
| Morf4I2       | A_51_P416387 | NM_019768    | mortality factor 4 like 2                                   | -1.078 | 79.26 | 0.94386 | 24637 M | 1.031  | 36.07 | 0.65605 | 9932  |
| Pkd1          | A_51_P249127 | NM_013630    | polycystic kidney disease 1 homolog                         | -1.078 | 79.26 | 0.92504 | 33448 P | 1.096  | 16.2  | 0.26679 | 5898  |
| Rere          | A_52_P421149 | XM_204015    | arginine glutamic acid dipeptide (RE) repeat                | -1.078 | 75.14 | 0.85793 | 28126 P | 1.246  | 4.63  | 0.12137 | 3529  |
| Rnase6        | A_51_P104608 | NM_030098    | ribonuclease, RNase A family, 6                             | -1.078 | 72.2  | 0.83384 | 26412 P | -1.035 | 45.05 | 0.51724 | 8735  |
| Thoc3         | A_52_P869802 | NM_028597    | THO complex 3                                               | -1.078 | 75.14 | 0.86821 | 28778 P | 1.042  | 28.13 | 0.37618 | 7235  |
| Trim28        | A_51_P323299 | NM_011588    | tripartite motif protein 28                                 | -1.078 | 75.14 | 0.85886 | 28155 P | -1.117 | 5.75  | 0.06325 | 2236  |
| Unc5b         | A_51_P294535 | NM_029770    | unc-5 homolog B (C. elegans)                                | -1.078 | 81.02 | 0.95102 | 35566 P | 1.071  | 22.1  | 0.39381 | 7449  |
| Aamp          | A_52_P624362 | NM_146110    | angio-associated migratory protein                          | -1.079 | 75.14 | 0.85763 | 28107 P | 1.051  | 28.13 | 0.46854 | 8191  |
| Arpc4         | A_52_P185485 | NM_026552    | actin related protein 2/3 complex, subunit 4                | -1.079 | 77.44 | 0.87879 | 27761 P | 1.117  | 9.71  | 0.13386 | 3739  |
| Fbn2          | A_51_P103850 | NM_010181    | fibrillin 2                                                 | -1.079 | 69.29 | 0.80242 | 24171 P | 1.096  | 11.33 | 0.11709 | 3419  |
| Ktn1          | A_51_P233059 | NM_008477    | kinectin 1                                                  | -1.079 | 79.26 | 0.83558 | 24941 P | 1.075  | 19.02 | 0.3317  | 6699  |
| Mast3         | A_52_P631591 | BC024265     | microtubule associated serine/threonine kinase 3            | -1.079 | 79.26 | 0.91097 | 32037 P | -1.016 | 49.48 | 0.80996 | 11279 |
| Ptgis         | A_51_P372819 | NM_008968    | prostaglandin I2 (prostacyclin) synthase                    | -1.079 | 79.26 | 0.91011 | 31963 P | 1.081  | 13.58 | 0.1508  | 4049  |
| Terf1         | A_51_P482464 | NM_009352    | telomeric repeat binding factor 1                           | -1.079 | 79.26 | 0.94102 | 34653 P | 1.025  | 36.07 | 0.59423 | 9378  |
| Trappc4       | A_52_P641172 | NM_021789    | trafficking protein particle complex 4                      | -1.079 | 75.14 | 0.86901 | 28839 P | 1.039  | 28.13 | 0.42405 | 7764  |
| Eif2b1        | A_51_P394339 | NM_145371    | eukaryotic translation initiation factor 2B, epsilon        | -1.08  | 77.44 | 0.89084 | 30291 P | -1.013 | 49.48 | 0.82319 | 11395 |
| Fjx1          | A_51_P355589 | NM_010218    | four jointed box 1 (Drosophila)                             | -1.08  |       | 0.92998 | 21034 A | 1.045  | 28.13 | 0.46074 | 8115  |
| Igf2r         | A_51_P125467 | NM_010515    | insulin-like growth factor 2 receptor                       | -1.08  | 75.14 | 0.89289 | 22133 M | 1.092  | 9.71  | 0.09557 | 3007  |
| Ikbke         | A_51_P222280 | NM_019777    | inhibitor of kappaB kinase epsilon                          | -1.08  | 72.2  | 0.81591 | 25161 P | -1.163 | 2.53  | 0.03749 | 1428  |
| Lama5         | A_51_P411061 | XM_203796    | laminin, alpha 5                                            | -1.08  | 75.14 | 0.84631 | 27509 P | -1.023 | 47.92 | 0.65501 | 9918  |
| Ncstn         | A_51_P396643 | NM_021607    | nicastrin                                                   | -1.08  | 72.2  | 0.80911 | 24650 P | 1.207  | 3.46  | 0.04595 | 1724  |
| Ssfa2         | A_52_P637829 | NM_080558    | sperm specific antigen 2                                    | -1.08  | 69.29 | 0.80342 | 24318 P | -1.017 | 48.7  | 0.67749 | 10110 |
| Tmed4         | A_51_P291682 | NM_134020    | transmembrane emp24 protein transport domain containing 4   | -1.08  | 75.14 | 0.90015 | 22467 M | 1.171  | 3.82  | 0.03927 | 1488  |
| 2610209M04Rik | A_51_P346884 | NM_025665    | RIKEN cDNA 2610209M04 gene                                  | -1.081 | 72.2  | 0.87933 | 21552 M | -1.061 | 33.49 | 0.25007 | 5639  |
| 9130005N14Rik | A_51_P303180 | NM_026667    | RIKEN cDNA 9130005N14 gene                                  | -1.081 | 75.14 | 0.83762 | 26911 P | -1.046 | 40.63 | 0.31612 | 6536  |
| Casp9         | A_52_P663602 | NM_015733    | caspase 9                                                   | -1.081 | 77.44 | 0.88047 | 29672 P | -1.283 | 0.56  | 0.01291 | 558   |
| Ccne1         | A_52_P796682 | NM_007633    | cyclin E1                                                   | -1.081 | 69.29 | 0.79617 | 23884 P | -1.022 | 49.47 | 0.75244 | 10807 |
| Ifrd1         | A_51_P367060 | NM_013562    | interferon-related developmental regulator 1                | -1.081 | 79.26 | 0.92907 | 24004 M | 1.166  | 3.82  | 0.03516 | 1352  |
| Pvrl1         | A_52_P28651  | NM_021424    | poliovirus receptor-related 1                               | -1.081 | 79.26 | 0.92446 | 33415 P | -1.034 | 45.68 | 0.5599  | 9105  |
| Rfx1          | A_52_P523480 | NM_009055    | regulatory factor X, 1 (influences HLA class II expression) | -1.081 | 75.14 | 0.85452 | 27985 P | 1.106  | 11.33 | 0.18632 | 4675  |
| Rras          | A_52_P635182 | NM_009101    | Harvey rat sarcoma oncogene, subgroup B                     | -1.081 | 77.44 | 0.88982 | 30234 P | 1.106  | 8.32  | 0.07176 | 2427  |
| Sec61g        | A_51_P204390 | NM_011343    | SEC61, gamma subunit                                        | -1.081 | 75.14 | 0.90191 | 22547 M | -1.094 | 16.2  | 0.12116 | 3523  |
| 2700081O15Rik | A_52_P496628 | NM_175381    | RIKEN cDNA 2700081O15 gene                                  | -1.082 | 69.29 | 0.78621 | 23142 P | -1.043 | 42.43 | 0.35691 | 6977  |
| 2810012G03Rik | A_51_P121432 | NM_175104    | RIKEN cDNA 2810012G03 gene                                  | -1.082 | 75.14 | 0.85831 | 28140 P | 1.01   | 42.43 | 0.9007  | 12082 |
| 2810021B07Rik | A_51_P293706 | NM_025479    | RIKEN cDNA 2810021B07 gene                                  | -1.082 | 72.2  | 0.82538 | 25715 P | 1.05   | 25.31 | 0.38883 | 7385  |
| Bmp8a         | A_51_P213266 | NM_007558    | bone morphogenetic protein 8a                               | -1.082 | 79.26 | 0.91525 | 22894 M | -1.006 | 49.48 | 0.91451 | 12215 |
| Btbd2         | A_51_P424054 | XM_001000710 | BTB (POZ) domain containing 2                               | -1.082 | 79.26 | 0.91716 | 32740 P | -1.067 | 36.07 | 0.29981 | 6314  |
| Cog6          | A_51_P298486 | NM_026225    | component of oligomeric golgi complex 6                     | -1.082 | 84.56 | 0.931   | 31404 P | 1.502  | 0.66  | 0.01874 | 790   |
| Gstm6         | A_52_P415996 | NM_008184    | glutathione S-transferase, mu 6                             | -1.082 | 79.26 | 0.93689 | 34325 M | 1.003  | 42.43 | 0.96229 | 12684 |
| Kntc2         | A_51_P191649 | NM_023294    | NDC80 homolog, kinetochore complex component                | -1.082 | 77.44 | 0.87149 | 29040 P | 1.164  | 6.98  | 0.10991 | 3263  |
| Mocs2         | A_52_P674309 | NM_013826    | molybdenum cofactor synthesis 2                             | -1.082 | 77.44 | 0.87776 | 29458 P | 1.059  | 19.02 | 0.21877 | 5185  |
| Rab27b        | A_52_P120719 | NM_030554    | RAB27b, member RAS oncogene family                          | -1.082 | 81.02 | 0.95092 | 35540 P | 1.056  | 19.02 | 0.23454 | 5420  |
| Sav1          | A_52_P652094 | NM_022028    | salvador homolog 1 (Drosophila)                             | -1.082 | 72.2  | 0.8321  | 26221 P | 1.083  | 16.2  | 0.25746 | 5771  |
| Serhl         | A_51_P200277 | NM_023475    | serine hydrolase-like                                       | -1.082 | 79.26 | 0.91079 | 32022 P | 1.019  | 40.63 | 0.72658 | 10532 |
| Ccdc9         | A_52_P265811 | NM_172297    | coiled-coil domain containing 9                             | -1.083 | 77.44 | 0.88996 | 30244 P | 1.078  | 16.2  | 0.1951  | 4818  |
| Paip2         | A_51_P514647 | NM_026420    | polyadenylate-binding protein-interacting protein 2         | -1.083 | 72.2  | 0.88189 | 21659 M | 1.144  | 22.1  | 0.60487 | 9492  |
| Plekkg2       | A_51_P178022 | NM_138752    | pleckstrin homology domain containing, family 1, member 2   | -1.083 | 79.26 | 0.91788 | 32778 P | -1.358 | 0.51  | 0.00584 | 62    |
| Reps1         | A_52_P527842 | NM_009048    | RalBP1 associated Eps domain containing protein 1           | -1.083 | 65.79 | 0.78014 | 22764 P | 1.133  | 9.71  | 0.17468 | 4464  |
| Zfp161        | A_52_P59931  | NM_009547    | zinc finger protein 161                                     | -1.083 | 79.26 | 0.92457 | 23845 M | 1.064  | 16.2  | 0.18807 | 4700  |
| Zswim1        | A_51_P232474 | NM_028028    | zinc finger, SWIM domain containing 1                       | -1.083 | 77.44 | 0.88647 | 30060 P | 1.069  | 25.31 | 0.45852 | 8083  |
| 2810482I07Rik | A_51_P476357 | AV024949     | RIKEN cDNA 2810482I07 gene                                  | -1.085 | 72.2  | 0.81031 | 24720 P | 1.01   | 42.43 | 0.87139 | 11769 |
| 5730557L09Rik | A_52_P86774  | AK077727     | RIKEN cDNA 5730557L09 gene                                  | -1.085 | 77.44 | 0.87717 | 29408 P | 1.035  | 38.4  | 0.81197 | 11294 |
| 5830416A07Rik | A_51_P121359 | NM_001029993 | RIKEN cDNA 5830416A07 gene                                  | -1.085 | 69.29 | 0.79472 | 23798 P | -1.028 | 46.85 | 0.62002 | 9622  |

|               |              |                     |                                              |        |       |         |         |        |       |         |       |
|---------------|--------------|---------------------|----------------------------------------------|--------|-------|---------|---------|--------|-------|---------|-------|
| Cyp2b13       | A_52_P289091 | NM_007813           | cytochrome P450, family 2, subfamily b, p    | -1.085 | 75.14 | 0.85981 | 28222 P | 1.098  | 9.71  | 0.07728 | 2580  |
| Ggta1         | A_51_P349988 | NM_010283           | glycoprotein galactosyltransferase alpha 1   | -1.085 | 77.44 | 0.88774 | 30127 P | 1.026  | 36.07 | 0.64071 | 9813  |
| Ing1          | A_52_P598    | NM_011919           | inhibitor of growth family, member 1         | -1.085 | 77.44 | 0.8844  | 29945 P | 1.111  | 11.33 | 0.17232 | 4410  |
| Ppp1ca        | A_51_P509389 | NM_031868           | protein phosphatase 1, catalytic subunit,    | -1.085 | 77.44 | 0.88459 | 29965 P | 1.041  | 25.31 | 0.35169 | 6905  |
| Sp1           | A_51_P256919 | NM_013672           | trans-acting transcription factor 1          | -1.085 | 72.2  | 0.80746 | 24544 P | -1.035 | 47.43 | 0.72221 | 10513 |
| Tm9sf2        | A_51_P143901 | NM_080556           | transmembrane 9 superfamily member 2         | -1.085 | 69.29 | 0.86488 | 20978 M | 1.207  | 3.01  | 0.03553 | 1375  |
| Acads         | A_52_P367745 | NM_007383           | acyl-Coenzyme A dehydrogenase, short c       | -1.086 | 72.2  | 0.82214 | 24105 M | -1.045 | 42.43 | 0.35416 | 6938  |
| Arhgap1       | A_51_P412010 | NM_146124           | Rho GTPase activating protein 1              | -1.086 | 69.29 | 0.78046 | 22789 P | 1.005  | 42.43 | 0.92273 | 12308 |
| Fbs1          | A_52_P617619 | XM_284344           | fibrosin 1                                   | -1.086 | 77.44 | 0.90577 | 31499 P | -1.081 | 38.4  | 0.44322 | 7948  |
| Fli1          | A_52_P821    | NM_008026           | Friend leukemia integration 1                | -1.086 | 79.26 | 0.93941 | 34522 P | 1.017  | 40.63 | 0.74777 | 10768 |
| Hpgd          | A_51_P458781 | NM_008278           | hydroxyprostaglandin dehydrogenase 15        | -1.086 | 79.26 | 0.92458 | 33423 P | 1.091  | 11.33 | 0.14653 | 3974  |
| Ociad1        | A_52_P17369  | NM_023429           | OClA domain containing 1                     | -1.086 | 77.44 | 0.89289 | 30470 P | 1.047  | 28.13 | 0.42795 | 7801  |
| Snapc5        | A_51_P244061 | NM_183316           | small nuclear RNA activating complex, po     | -1.086 | 75.14 | 0.84726 | 27565 P | -1.075 | 36.07 | 0.37807 | 7258  |
| 1500032L24Rik | A_51_P501815 | NM_026914           | RIKEN cDNA 1500032L24 gene                   | -1.087 | 75.14 | 0.86568 | 28553 P | -1.035 | 45.68 | 0.58445 | 9295  |
| B3gat2        | A_52_P236755 | NM_172124           | beta-1,3-glucuronyltransferase 2 (glucuro    | -1.087 | 79.26 | 0.92753 | 33642 M | 1.048  | 25.31 | 0.31012 | 6448  |
| Clu           | A_51_P367720 | NM_013492           | clusterin                                    | -1.087 | 79.26 | 0.92998 | 33811 P | 1.153  | 9.71  | 0.18763 | 4692  |
| Col4a1        | A_51_P124254 | NM_009931           | procollagen, type IV, alpha 1                | -1.087 | 75.14 | 0.84821 | 27607 P | 1.119  | 9.71  | 0.13857 | 3810  |
| Ddx3x         | A_51_P290018 | XM_981517           | DEAD/H (Asp-Glu-Ala-Asp/His) box polype      | -1.087 | 77.44 | 0.91805 | 23478 M | 1.067  | 30.75 | 0.67318 | 10081 |
| Ezh1          | A_52_P237871 | NM_007970           | enhancer of zeste homolog 1 (Drosophila      | -1.087 | 72.2  | 0.81586 | 25142 P | -1.021 | 49    | 0.73045 | 10575 |
| Hivep1        | A_51_P436002 | NM_007772           | human immunodeficiency virus type I enl      | -1.087 | 69.29 | 0.78992 | 23440 P | 1.253  | 2.53  | 0.04001 | 1527  |
| Trim13        | A_52_P17788  | NM_023233           | tripartite motif protein 13                  | -1.087 | 77.44 | 0.90177 | 31124 P | 1.077  | 13.58 | 0.18414 | 4639  |
| Tst           | A_51_P430082 | NM_009437           | thiosulfate sulfurtransferase, mitochondr    | -1.087 | 77.44 | 0.90726 | 31588 P | -1.103 | 5.75  | 0.05826 | 2088  |
| Ube1l         | A_51_P316816 | NM_023738           | ubiquitin-activating enzyme E1-like          | -1.087 | 75.14 | 0.85581 | 28030 P | 1.087  | 11.33 | 0.12123 | 3525  |
| Wnt10b        | A_51_P304643 | NM_011718           | wingless related MMTV integration site 1     | -1.087 |       | 0.87604 | 21258 A | 1.119  | 25.31 | 0.63989 | 9808  |
| 0610039J04Rik | A_51_P342271 | NM_001035123        | SET domain containing 6                      | -1.088 | 77.44 | 0.9     | 30990 P | -1.25  | 1.18  | 0.03799 | 1439  |
| Ap4m1         | A_51_P393067 | NM_021392           | adaptor-related protein complex AP-4, m      | -1.088 | 77.44 | 0.9089  | 31764 P | -1.095 | 11.33 | 0.08551 | 2784  |
| D14Ertd231e   | A_51_P491051 | NM_153414           | DNA segment, Chr 14, ERATO Doi 231, exp      | -1.088 | 75.14 | 0.86072 | 28267 P | -1.046 | 43.15 | 0.43325 | 7880  |
| Farp2         | A_51_P425254 | NM_145519           | FERM, RhoGEF and pleckstrin domain pro       | -1.088 | 72.2  | 0.79472 | 23803 P | 1.032  | 33.49 | 0.53134 | 8849  |
| Fhl3          | A_51_P310635 | NM_010213           | four and a half LIM domains 3                | -1.088 | 65.79 | 0.79372 | 22314 M | 1.006  | 42.43 | 0.8996  | 12060 |
| Gtf2f2        | A_51_P192817 | NM_026816           | general transcription factor IIF, polypeptic | -1.088 | 77.44 | 0.89285 | 30461 P | -1.004 | 49.48 | 0.94908 | 12576 |
| Safb          | A_51_P236287 | AK087504            | scaffold attachment factor B                 | -1.088 | 75.14 | 0.83244 | 26257 P | 1.081  | 16.2  | 0.26219 | 5842  |
| Timm44        | A_51_P143470 | NM_011592           | translocase of inner mitochondrial memb      | -1.088 | 72.2  | 0.87464 | 21380 M | -1.06  | 36.07 | 0.267   | 5900  |
| Anxa7         | A_52_P397385 | AK032013            | annexin A7                                   | -1.089 | 69.29 | 0.77962 | 22727 P | 1.028  | 33.49 | 0.5599  | 9108  |
| Arpc2         | A_51_P152199 | NM_029711           | actin related protein 2/3 complex, subuni    | -1.089 | 75.14 | 0.85089 | 27774 P | -1.037 | 45.68 | 0.60991 | 9525  |
| Grb2          | A_51_P198411 | NM_008163           | growth factor receptor bound protein 2       | -1.089 | 77.44 | 0.91974 | 23596 M | 1.094  | 11.33 | 0.11298 | 3336  |
| Pou6f1        | A_51_P348857 | NM_010127           | POU domain, class 6, transcription factor    | -1.089 | 72.2  | 0.8321  | 26226 P | -1.036 | 45.05 | 0.49722 | 8544  |
| Pter          | A_51_P251069 | NM_008961           | phosphotriesterase related                   | -1.089 | 81.02 | 0.96001 | 36389 P | -1.028 | 47.43 | 0.64576 | 9853  |
| Rae1          | A_52_P524463 | BC060072            | RAE1 RNA export 1 homolog (S. pombe)         | -1.089 | 75.14 | 0.8144  | 22029 M | -1.059 | 38.4  | 0.30257 | 6345  |
| Ropn1l        | A_51_P150763 | NM_145852           | ropporin 1-like                              | -1.089 | 65.79 | 0.75767 | 21506 P | 1.117  | 8.32  | 0.08594 | 2790  |
| Scarf1        | A_52_P95544  | NM_001004157        | scavenger receptor class F, member 1         | -1.089 | 75.14 | 0.85089 | 27771 P | -1.111 | 4.63  | 0.05188 | 1912  |
| Sptlc1        | A_51_P345593 | NM_009269           | serine palmitoyltransferase, long chain ba   | -1.089 | 72.2  | 0.80251 | 24195 P | -1.024 | 48.39 | 0.67108 | 10060 |
| Actg1         | A_52_P72237  | NM_009609           | actin, gamma, cytoplasmic 1                  | -1.091 | 79.26 | 0.93066 | 33893 P | 1.219  | 1.62  | 0.01251 | 530   |
| Il1rapl1      | A_51_P497833 | ENS MUST00000078875 | interleukin 1 receptor accessory protein-l   | -1.091 |       | 0.87529 | 29278 A | 1.042  | 28.13 | 0.36715 | 7129  |
| Ndufs1        | A_51_P273817 | AK017924            | NADH dehydrogenase (ubiquinone) Fe-S         | -1.091 | 72.2  | 0.82983 | 26051 M | 1.034  | 33.49 | 0.61518 | 9579  |
| Pgr           | A_52_P413840 | AK036862            | progesterone receptor                        | -1.091 |       | 0.96573 | 14501 A | 1.117  | 6.98  | 0.04898 | 1818  |
| Rab39b        | A_51_P356620 | NM_175122           | RAB39B, member RAS oncogene family           | -1.091 | 75.14 | 0.85249 | 27891 P | -1.081 | 22.1  | 0.14794 | 4001  |
| S100a9        | A_51_P402943 | NM_009114           | S100 calcium binding protein A9 (calgran     | -1.091 | 75.14 | 0.86523 | 28531 P | 1.057  | 25.31 | 0.41573 | 7688  |
| Adam15        | A_51_P291815 | NM_001037722        | a disintegrin and metallopeptidase doma      | -1.092 | 77.44 | 0.90457 | 31398 P | -1.146 | 3.01  | 0.04131 | 1560  |
| Amfr          | A_51_P435809 | NM_011787           | autocrine motility factor receptor           | -1.092 | 77.44 | 0.92253 | 23745 M | 1.135  | 6.98  | 0.0712  | 2418  |
| D930017J03Rik | A_52_P16973  | AK081934            | RIKEN cDNA D930017J03 gene                   | -1.092 | 75.14 | 0.85949 | 28211 P | -1.105 | 11.33 | 0.11595 | 3396  |
| Zfx1a         | A_52_P546635 | NM_011546           | zinc finger E-box binding homeobox 1         | -1.092 | 75.14 | 0.86304 | 28374 P | 1.071  | 25.31 | 0.51568 | 8723  |
| Zfp592        | A_52_P372142 | NM_178707           | zinc finger protein 592                      | -1.092 | 75.14 | 0.87052 | 28940 P | -1.142 | 4.63  | 0.07656 | 2565  |
| 1110012D08Rik | A_52_P384314 | NM_178066           | RIKEN cDNA 1110012D08 gene                   | -1.093 | 77.44 | 0.90075 | 31026 P | 1.153  | 6.98  | 0.11595 | 3395  |

|               |              |              |                                              |        |       |         |         |        |       |         |       |
|---------------|--------------|--------------|----------------------------------------------|--------|-------|---------|---------|--------|-------|---------|-------|
| 2310043N10Rik | A_51_P234692 | AK028745     | RIKEN cDNA 2310043N10 gene                   | -1.093 | 75.14 | 0.9493  | 32814 P | -1.073 | 46.3  | 0.78864 | 11079 |
| 2700059D21Rik | A_52_P442779 | NM_001007589 | RIKEN cDNA 2700059D21 gene                   | -1.093 | 72.2  | 0.81757 | 25255 P | -1.065 | 28.13 | 0.18425 | 4640  |
| Akt1s1        | A_51_P478326 | NM_026270    | AKT1 substrate 1 (proline-rich)              | -1.093 | 69.29 | 0.76604 | 21979 P | -1.08  | 16.2  | 0.11423 | 3373  |
| Brd7          | A_52_P311104 | NM_012047    | bromodomain containing 7                     | -1.093 | 72.2  | 0.82206 | 25501 P | 1.064  | 19.02 | 0.31099 | 6473  |
| Klk8          | A_52_P216672 | NM_008940    | kallikrein related-peptidase 8               | -1.093 | 79.26 | 0.94264 | 29678 M | -1.138 | 6.98  | 0.10588 | 3206  |
| Lyl1          | A_51_P143190 | NM_008535    | lymphoblastomic leukemia                     | -1.093 | 81.02 | 0.95683 | 36083 P | 1.066  | 19.02 | 0.22274 | 5253  |
| Rab5a         | A_51_P117600 | NM_025887    | RAB5A, member RAS oncogene family            | -1.093 | 65.79 | 0.74297 | 20716 P | 1.243  | 2.04  | 0.01802 | 767   |
| Suox          | A_51_P249360 | NM_173733    | sulfite oxidase                              | -1.093 | 72.2  | 0.87575 | 21436 M | -1.144 | 2.04  | 0.02741 | 1113  |
| Trappc6a      | A_51_P485683 | NM_025960    | trafficking protein particle complex 6A      | -1.093 | 69.29 | 0.78777 | 23254 P | 1.127  | 13.58 | 0.36472 | 7086  |
| Ttk           | A_52_P110534 | NM_009445    | Ttk protein kinase                           | -1.093 | 72.2  | 0.83762 | 23465 M | 1.045  | 30.75 | 0.50433 | 8624  |
| D330037H05Rik | A_52_P452268 | BC075726     | RIKEN cDNA D330037H05 gene                   | -1.094 | 79.26 | 0.92533 | 33476 P | -1.201 | 1.1   | 0.01749 | 749   |
| Gna-rs1       | A_52_P491766 | NM_008136    | guanine nucleotide binding protein, relat    | -1.094 | 72.2  | 0.81533 | 25116 P | 1.017  | 42.43 | 0.84813 | 11591 |
| Klhl18        | A_51_P429739 | NM_177771    | kelch-like 18 (Drosophila)                   | -1.094 | 72.2  | 0.80292 | 24245 P | 1.064  | 16.2  | 0.20496 | 4966  |
| Stk11ip       | A_51_P516994 | NM_027886    | serine/threonine kinase 11 interacting pr    | -1.094 | 79.26 | 0.92998 | 33769 P | 1.036  | 30.75 | 0.45026 | 7995  |
| Tor1a         | A_51_P365964 | NM_144884    | torsin family 1, member A (torsin A)         | -1.094 | 72.2  | 0.82679 | 25827 P | 1.14   | 5.75  | 0.05592 | 2032  |
| Cherp         | A_51_P519837 | NM_138585    | calcium homeostasis endoplasmic reticul      | -1.095 | 79.26 | 0.93984 | 34554 P | 1.073  | 22.1  | 0.40911 | 7600  |
| Cyba          | A_51_P131800 | NM_007806    | cytochrome b-245, alpha polypeptide          | -1.095 | 79.26 | 0.94858 | 35303 P | -1.057 | 42.43 | 0.45183 | 8011  |
| Dbn1          | A_51_P446232 | NM_019813    | drebrin 1                                    | -1.095 | 75.14 | 0.84866 | 27664 P | 1.11   | 9.71  | 0.12387 | 3578  |
| Map3k4        | A_51_P495767 | NM_011948    | mitogen activated protein kinase kinase k    | -1.095 | 72.2  | 0.80275 | 24232 P | -1.135 | 2.04  | 0.02978 | 1186  |
| Plscr3        | A_52_P8100   | NM_023564    | phospholipid scramblase 3                    | -1.095 | 69.29 | 0.81678 | 23809 M | 1.003  | 42.43 | 0.96018 | 12658 |
| Pmvk          | A_51_P492408 | NM_026784    | phosphomevalonate kinase                     | -1.095 | 75.14 | 0.8365  | 26849 P | -1.051 | 43.15 | 0.42897 | 7816  |
| Smarca5       | A_52_P304881 | NM_053124    | SWI/SNF related, matrix associated, actin    | -1.095 | 69.29 | 0.78867 | 23335 P | 1.095  | 16.2  | 0.33375 | 6722  |
| Usp16         | A_51_P513424 | NM_024258    | ubiquitin specific peptidase 16              | -1.095 | 69.29 | 0.77055 | 22226 P | -1.064 | 33.49 | 0.26484 | 5871  |
| 1810032O08Rik | A_51_P117666 | BC055707     | RIKEN cDNA 1810032O08 gene                   | -1.096 | 79.26 | 0.91725 | 32757 P | 1.036  | 30.75 | 0.44099 | 7931  |
| Abi1          | A_52_P333953 | NM_009594    | v-abl Abelson murine leukemia oncogene       | -1.096 | 79.26 | 0.91805 | 32827 P | 1.041  | 28.13 | 0.46025 | 8099  |
| Edg1          | A_52_P532227 | NM_007901    | endothelial differentiation sphingolipid G   | -1.096 | 72.2  | 0.79166 | 23564 P | 1.116  | 9.71  | 0.12865 | 3674  |
| Hspa14        | A_52_P361551 | NM_015765    | heat shock protein 14                        | -1.096 | 77.44 | 0.89647 | 30733 P | 1.014  | 42.43 | 0.80093 | 11188 |
| Klf3          | A_51_P492640 | NM_008453    | Kruppel-like factor 3 (basic)                | -1.096 | 72.2  | 0.82824 | 25915 P | 1.076  | 19.02 | 0.31099 | 6469  |
| Rab33b        | A_51_P502026 | NM_016858    | RAB33B, member of RAS oncogene family        | -1.096 | 72.2  | 0.8577  | 20734 M | 1.086  | 16.2  | 0.26942 | 5947  |
| Zfp361        | A_51_P235801 | NM_007564    | zinc finger protein 36, C3H type-like 1      | -1.096 | 72.2  | 0.86673 | 21058 M | 1.021  | 38.4  | 0.6857  | 10200 |
| Zfp410        | A_51_P369897 | NM_144833    | zinc finger protein 410                      | -1.096 | 72.2  | 0.82254 | 25563 P | 1.06   | 19.02 | 0.23432 | 5416  |
| 2610002F03Rik | A_52_P199776 | BC046478     | RIKEN cDNA 2610002F03 gene                   | -1.098 | 72.2  | 0.78969 | 23407 P | -1.039 | 44.4  | 0.4549  | 8046  |
| Cpne1         | A_51_P114772 | NM_170588    | copine I                                     | -1.098 | 75.14 | 0.84651 | 27531 P | 1.18   | 3.82  | 0.04225 | 1589  |
| Gstt2         | A_51_P350048 | NM_010361    | glutathione S-transferase, theta 2           | -1.098 | 77.44 | 0.90966 | 31874 P | 1.012  | 42.43 | 0.81394 | 11314 |
| Igsf9         | A_52_P443701 | NM_033608    | immunoglobulin superfamily, member 9         | -1.098 | 72.2  | 0.79286 | 23679 M | -1.042 | 43.15 | 0.40481 | 7565  |
| Mat2a         | A_51_P500344 | NM_145569    | methionine adenosyltransferase II, alpha     | -1.098 | 69.29 | 0.84186 | 20178 M | 1.376  | 0.24  | 0.00584 | 87    |
| Nudc          | A_51_P238933 | NM_010948    | nuclear distribution gene C homolog (Asp     | -1.098 | 77.44 | 0.89084 | 30288 P | -1.063 | 28.13 | 0.17235 | 4414  |
| Pdcd7         | A_51_P487345 | NM_016688    | programmed cell death protein 7              | -1.098 | 69.29 | 0.78154 | 22834 P | 1.023  | 40.63 | 0.80077 | 11181 |
| Ppp4c         | A_51_P208394 | NM_019674    | protein phosphatase 4, catalytic subunit     | -1.098 | 75.14 | 0.84314 | 27282 P | 1.048  | 28.13 | 0.43068 | 7837  |
| Pscd3         | A_51_P488928 | NM_011182    | pleckstrin homology, Sec7 and coiled-coil    | -1.098 | 65.79 | 0.7471  | 20940 P | -1.106 | 9.71  | 0.08456 | 2775  |
| 1110008F13Rik | A_51_P450100 | NM_026124    | RIKEN cDNA 1110008F13 gene                   | -1.099 | 61.79 | 0.72253 | 19821 P | -1.051 | 36.07 | 0.26234 | 5844  |
| 4632417K18Rik | A_51_P394802 | NM_026640    | RIKEN cDNA 4632417K18 gene                   | -1.099 | 77.44 | 0.894   | 30578 P | -1.059 | 40.63 | 0.3817  | 7297  |
| 4933403F05Rik | A_51_P216313 | NM_153794    | RIKEN cDNA 4933403F05 gene                   | -1.099 | 72.2  | 0.79257 | 23646 P | 1.094  | 9.71  | 0.08191 | 2698  |
| 4933433P14Rik | A_52_P338039 | NM_178613    | RIKEN cDNA 4933433P14 gene                   | -1.099 | 77.44 | 0.90152 | 31100 P | -1.007 | 49.48 | 0.93505 | 12430 |
| Akr1c18       | A_51_P256170 | NM_134066    | aldo-keto reductase family 1, member C1      | -1.099 | 77.44 | 0.88692 | 30085 P | 1.103  | 11.33 | 0.13414 | 3749  |
| D11Wsu99e     | A_51_P146407 | NM_138598    | DNA segment, Chr 11, Wayne State Unive       | -1.099 | 72.2  | 0.79111 | 23510 P | 1.14   | 4.63  | 0.03749 | 1427  |
| Eif2b5        | A_51_P151968 | NM_172265    | eukaryotic translation initiation factor 2B, | -1.099 | 72.2  | 0.80925 | 24654 P | 1.079  | 16.2  | 0.21435 | 5100  |
| Gdf1          | A_51_P464300 | NM_008107    | growth differentiation factor 1              | -1.099 | 77.44 | 0.89651 | 30741 P | 1.048  | 28.13 | 0.43434 | 7891  |
| Icam2         | A_51_P267754 | NM_010494    | intercellular adhesion molecule 2            | -1.099 | 69.29 | 0.75252 | 21218 P | 1.143  | 4.63  | 0.03429 | 1319  |
| Pparbp        | A_51_P324082 | NM_013634    | peroxisome proliferator activated recepto    | -1.099 | 69.29 | 0.78314 | 22962 P | 1.006  | 42.43 | 0.92557 | 12347 |
| 3230401M21Rik | A_51_P299216 | BC043315     | WD repeat domain 90                          | -1.1   | 77.44 | 0.90217 | 31197 P | -1.229 | 0.56  | 0.01026 | 389   |
| 8430436F23Rik | A_51_P470205 | AK018460     | MOB1, Mps One Binder kinase activator-l      | -1.1   | 79.26 | 0.91685 | 32730 P | 1.106  | 16.2  | 0.40034 | 7518  |
| A730098D12Rik | A_52_P472936 | BC048817     | RIKEN cDNA A730098D12 gene                   | -1.1   | 72.2  | 0.85251 | 20601 M | 1.064  | 22.1  | 0.33754 | 6756  |

|               |              |           |                                            |        |       |         |         |        |       |         |       |
|---------------|--------------|-----------|--------------------------------------------|--------|-------|---------|---------|--------|-------|---------|-------|
| BC004022      | A_51_P310773 | BC004022  | cDNA sequence BC004022                     | -1.1   | 65.79 | 0.72464 | 19987 P | -1.138 | 3.01  | 0.03558 | 1380  |
| Cap1          | A_51_P440682 | NM_007598 | CAP, adenylate cyclase-associated protein  | -1.1   | 72.2  | 0.8182  | 25310 P | 1.155  | 5.75  | 0.07509 | 2533  |
| Dhx30         | A_51_P426283 | NM_133347 | DEAH (Asp-Glu-Ala-His) box polypeptide 3   | -1.1   | 79.26 | 0.92825 | 33670 P | -1.084 | 22.1  | 0.15965 | 4211  |
| Nudcd2        | A_51_P418339 | NM_026023 | NudC domain containing 2                   | -1.1   | 75.14 | 0.8596  | 28214 P | -1.006 | 49.48 | 0.90494 | 12145 |
| Thoc4         | A_51_P154684 | NM_011568 | THO complex 4                              | -1.1   | 77.44 | 0.89984 | 22453 M | 1.141  | 4.63  | 0.04147 | 1567  |
| Cacnb3        | A_51_P259009 | NM_007581 | calcium channel, voltage-dependent, beta   | -1.101 | 77.44 | 0.90512 | 31450 P | -1.217 | 0.75  | 0.01399 | 588   |
| Dom3z         | A_51_P267388 | NM_033613 | DOM-3 homolog Z (C. elegans)               | -1.101 | 77.44 | 0.89472 | 30644 P | 1.103  | 8.32  | 0.07486 | 2524  |
| Entpd2        | A_51_P112932 | NM_009849 | ectonucleoside triphosphate diphosphoh     | -1.101 | 75.14 | 0.86128 | 28308 P | 1.254  | 2.04  | 0.02453 | 1016  |
| Irf2bp2       | A_51_P424221 | XM_284454 | interferon regulatory factor 2 binding pro | -1.101 | 77.44 | 0.92106 | 23685 M | 1.159  | 8.32  | 0.18324 | 4629  |
| Pink1         | A_51_P196605 | NM_026880 | PTEN induced putative kinase 1             | -1.101 | 75.14 | 0.86362 | 28428 P | 1.019  | 38.4  | 0.66562 | 10008 |
| Snx17         | A_51_P225083 | NM_153680 | sorting nexin 17                           | -1.101 | 75.14 | 0.84699 | 27551 P | 1.075  | 16.2  | 0.24634 | 5597  |
| Unc84a        | A_51_P281433 | NM_024451 | unc-84 homolog A (C. elegans)              | -1.101 | 72.2  | 0.84837 | 20437 M | 1.235  | 3.01  | 0.03933 | 1490  |
| Lgtn          | A_52_P352327 | NM_010709 | ligatin                                    | -1.103 | 72.2  | 0.7993  | 24064 P | 1.012  | 42.43 | 0.82423 | 11400 |
| Rab8a         | A_52_P684214 | NM_023126 | RAB8A, member RAS oncogene family          | -1.103 | 65.79 | 0.71828 | 19403 P | 1.103  | 11.33 | 0.16339 | 4275  |
| Sbds          | A_51_P466875 | NM_023248 | Shwachman-Bodian-Diamond syndrome l        | -1.103 | 69.29 | 0.77055 | 22235 P | 1.11   | 6.98  | 0.05688 | 2059  |
| AA536749      | A_51_P275514 | NM_012027 | expressed sequence AA536749                | -1.104 | 72.2  | 0.82821 | 25897 P | 1.039  | 30.75 | 0.53437 | 8884  |
| AI597479      | A_52_P239292 | NM_133818 | expressed sequence AI597479                | -1.104 | 72.2  | 0.7912  | 23545 P | 1.081  | 16.2  | 0.28389 | 6133  |
| Cbx6          | A_51_P221428 | NM_028763 | chromobox homolog 6                        | -1.104 | 77.44 | 0.90032 | 22471 M | 1.175  | 6.98  | 0.13611 | 3777  |
| Chaf1b        | A_51_P367310 | NM_028083 | chromatin assembly factor 1, subunit B (p  | -1.104 | 69.29 | 0.75252 | 21235 P | 1.103  | 8.32  | 0.06041 | 2160  |
| Clic4         | A_51_P127681 | NM_013885 | chloride intracellular channel 4 (mitochor | -1.104 | 69.29 | 0.75046 | 21104 P | -1.061 | 42.43 | 0.5077  | 8656  |
| Dazap1        | A_51_P205099 | NM_133188 | DAZ associated protein 1                   | -1.104 | 75.14 | 0.87252 | 29097 P | 1.1    | 16.2  | 0.30384 | 6364  |
| Ewsr1         | A_51_P412947 | NM_007968 | Ewing sarcoma breakpoint region 1          | -1.104 | 65.79 | 0.73228 | 20363 P | 1.078  | 22.1  | 0.49039 | 8439  |
| Oprs1         | A_51_P300726 | NM_011014 | opioid receptor, sigma 1                   | -1.104 | 72.2  | 0.81925 | 25380 P | 1.056  | 19.02 | 0.23951 | 5477  |
| Rbm15b        | A_51_P503194 | AK075777  | RNA binding motif protein 15B              | -1.104 | 69.29 | 0.77113 | 22259 P | 1.095  | 9.71  | 0.08424 | 2756  |
| Rnmt1         | A_51_P401527 | NM_183263 | RNA methyltransferase like 1               | -1.104 | 72.2  | 0.81115 | 24793 P | 1.008  | 42.43 | 0.89972 | 12062 |
| Silbp         | A_51_P127615 | NM_009193 | stem-loop binding protein                  | -1.104 | 72.2  | 0.86734 | 21082 M | 1.034  | 33.49 | 0.52445 | 8793  |
| Fbxo5         | A_51_P393958 | NM_025995 | F-box protein 5                            | -1.105 | 57.76 | 0.69711 | 18246 P | -1.308 | 0.51  | 0.00756 | 277   |
| H1fx          | A_52_P748854 | BU511373  | H1 histone family, member X                | -1.105 | 72.2  | 0.79819 | 23996 P | -1.26  | 0.51  | 0.00707 | 224   |
| Mtap          | A_51_P341349 | NM_024433 | methylthioadenosine phosphorylase          | -1.105 | 69.29 | 0.76474 | 21895 P | 1.025  | 38.4  | 0.74275 | 10713 |
| Ppp2r5d       | A_51_P233396 | NM_009358 | protein phosphatase 2, regulatory subuni   | -1.105 | 72.2  | 0.79387 | 23754 P | 1.133  | 13.58 | 0.30041 | 6326  |
| Rbm12         | A_51_P276652 | NM_029397 | RNA binding motif protein 12               | -1.105 | 72.2  | 0.79782 | 23986 P | 1.043  | 28.13 | 0.42431 | 7770  |
| Rxbp1         | A_52_P519689 | NM_011306 | retinoid X receptor beta                   | -1.105 | 72.2  | 0.81524 | 25093 P | 1.006  | 42.43 | 0.90206 | 12111 |
| Usp21         | A_51_P346747 | NM_013919 | ubiquitin specific peptidase 21            | -1.105 | 69.29 | 0.77135 | 22266 P | 1.048  | 22.1  | 0.2683  | 5928  |
| Zmynd11       | A_52_P609965 | NM_144516 | zinc finger, MYND domain containing 11     | -1.105 | 69.29 | 0.7737  | 22443 P | 1.141  | 5.75  | 0.04552 | 1705  |
| 1700001O22Rik | A_52_P552870 | AK019754  | RIKEN cDNA 1700001O22 gene                 | -1.106 | 72.2  | 0.80341 | 24306 P | -1.317 | 0.51  | 0.0131  | 565   |
| 2310047M10Rik | A_51_P518926 | AK009886  | RIKEN cDNA 2310047M10 gene                 | -1.106 | 75.14 | 0.8411  | 27161 P | -1.195 | 1.18  | 0.02027 | 868   |
| Bzw1          | A_52_P542763 | NM_025824 | basic leucine zipper and W2 domains 1      | -1.106 | 69.29 | 0.77253 | 22372 P | -1.14  | 3.01  | 0.03908 | 1475  |
| Cebpg         | A_52_P121675 | NM_009884 | CCAAT/enhancer binding protein (C/EBP),    | -1.106 | 65.79 | 0.71236 | 19074 P | 1.051  | 22.1  | 0.31694 | 6550  |
| Kdelr1        | A_52_P596541 | NM_133950 | KDEL (Lys-Asp-Glu-Leu) endoplasmic retic   | -1.106 | 72.2  | 0.81447 | 25023 P | 1.171  | 3.46  | 0.02661 | 1089  |
| Lhx4          | A_51_P233088 | NM_010712 | LIM homeobox protein 4                     | -1.106 | 72.2  | 0.80341 | 24308 P | 1.074  | 19.02 | 0.32814 | 6649  |
| Nr1d1         | A_52_P130952 | NM_145434 | nuclear receptor subfamily 1, group D, me  | -1.106 | 72.2  | 0.80512 | 24426 P | 1.036  | 33.49 | 0.64844 | 9872  |
| Rcn2          | A_51_P165041 | AF049125  | reticulocalbin 2                           | -1.106 | 61.79 | 0.69665 | 18229 P | 1.116  | 6.98  | 0.06119 | 2173  |
| Fhl2          | A_51_P140237 | NM_010212 | four and a half LIM domains 2              | -1.107 | 79.26 | 0.93516 | 34206 P | 1.216  | 2.04  | 0.01604 | 693   |
| G6pdx         | A_51_P187082 | NM_008062 | glucose-6-phosphate dehydrogenase X-lir    | -1.107 | 75.14 | 0.83958 | 27099 P | 1.071  | 11.33 | 0.28992 | 5745  |
| Nr0b2         | A_51_P265338 | NM_011850 | nuclear receptor subfamily 0, group B, me  | -1.107 | 69.29 | 0.77073 | 22251 P | -1.198 | 0.75  | 0.01279 | 554   |
| Polr2c        | A_51_P239926 | NM_009090 | polymerase (RNA) II (DNA directed) polyp   | -1.107 | 72.2  | 0.7918  | 23594 P | -1.035 | 44.4  | 0.44543 | 7964  |
| Vasp          | A_51_P179131 | AK157021  | vasodilator-stimulated phosphoprotein      | -1.107 | 65.79 | 0.72307 | 19876 P | 1.159  | 3.82  | 0.02935 | 1177  |
| Wsb2          | A_52_P683572 | NM_021539 | WD repeat and SOCS box-containing 2        | -1.107 | 65.79 | 0.72729 | 20063 P | 1.402  | 0.24  | 0.00619 | 118   |
| Bmyc          | A_52_P466853 | NM_023326 | brain expressed myelocytomatosis oncog     | -1.109 | 72.2  | 0.83384 | 26389 P | -1.031 | 46.3  | 0.59283 | 9364  |
| Psen1         | A_51_P464576 | NM_008943 | presenilin 1                               | -1.109 | 61.79 | 0.68802 | 17820 P | 1.117  | 11.33 | 0.19968 | 4898  |
| Sumo2         | A_51_P427906 | NM_133354 | SMT3 suppressor of mif two 3 homolog 2     | -1.109 | 72.2  | 0.85256 | 20604 M | -1.12  | 8.32  | 0.08802 | 2840  |
| 573045316Rik  | A_51_P283754 | NM_172302 | RIKEN cDNA 573045316 gene                  | -1.11  | 72.2  | 0.80436 | 24380 P | 1.023  | 36.07 | 0.59276 | 9362  |
| Actr5         | A_52_P216548 | AK046584  | ARP5 actin-related protein 5 homolog (ye   | -1.11  | 72.2  | 0.8184  | 22271 M | 1.112  | 11.33 | 0.15498 | 4130  |



|               |              |              |                                              |        |       |         |         |        |       |         |       |
|---------------|--------------|--------------|----------------------------------------------|--------|-------|---------|---------|--------|-------|---------|-------|
| Asl           | A_51_P174645 | NM_133768    | argininosuccinate lyase                      | -1.11  | 72.2  | 0.82666 | 25807 P | 1.033  | 36.07 | 0.70131 | 10331 |
| Entpd4        | A_52_P582907 | NM_026174    | ectonucleoside triphosphate diphosphoh       | -1.11  | 77.44 | 0.8938  | 30571 P | -1.124 | 6.98  | 0.08811 | 2843  |
| Hey1          | A_51_P258409 | NM_010423    | hairy/enhancer-of-split related with YRPV    | -1.11  | 65.79 | 0.73577 | 20480 P | 1.05   | 28.13 | 0.48617 | 8396  |
| Qtrt1         | A_51_P314168 | NM_021888    | queuine tRNA-ribosyltransferase 1            | -1.11  | 65.79 | 0.70918 | 18903 P | 1.014  | 40.63 | 0.73874 | 10676 |
| Rfwd3         | A_52_P4698   | NM_146218    | ring finger and WD repeat domain 3           | -1.11  | 72.2  | 0.79639 | 23898 P | 1.212  | 2.53  | 0.01955 | 828   |
| Sfrs6         | A_51_P185121 | AK004831     | splicing factor, arginine/serine-rich 6      | -1.11  | 72.2  | 0.81482 | 25068 P | 1.305  | 2.53  | 0.04505 | 1674  |
| Tyki          | A_51_P400190 | NM_020557    | thymidylate kinase family LPS-inducible n    | -1.11  | 69.29 | 0.74634 | 20896 P | 1.047  | 25.31 | 0.33257 | 6710  |
| Uts2r         | A_51_P292016 | NM_145440    | urotensin 2 receptor                         | -1.11  | 75.14 | 0.85928 | 28182 P | 1.118  | 9.71  | 0.10872 | 3236  |
| Amd1          | A_51_P381763 | Z14986       | S-adenosylmethionine decarboxylase 1         | -1.111 | 69.29 | 0.82265 | 19058 M | -1.01  | 49.48 | 0.94555 | 12535 |
| B230208H17Rik | A_52_P86750  | AK081397     | RIKEN cDNA B230208H17 gene                   | -1.111 | 77.44 | 0.88878 | 30179 M | -1.028 | 46.3  | 0.88878 | 9140  |
| Birc6         | A_51_P297586 | NM_007566    | baculoviral IAP repeat-containing 6          | -1.111 | 72.2  | 0.84605 | 20357 M | 1.014  | 42.43 | 0.85696 | 11643 |
| Dhx32         | A_51_P285997 | NM_133941    | DEAH (Asp-Glu-Ala-His) box polypeptide 3     | -1.111 | 69.29 | 0.76735 | 22051 P | 1.021  | 40.63 | 0.7827  | 11022 |
| Enpp4         | A_51_P207934 | NM_199016    | ectonucleotide pyrophosphatase/phosph        | -1.111 | 72.2  | 0.79812 | 23993 P | -1.074 | 38.4  | 0.43222 | 7861  |
| Hdac7a        | A_52_P435016 | NM_019572    | histone deacetylase 7A                       | -1.111 | 72.2  | 0.81015 | 24709 P | -1.05  | 42.43 | 0.39103 | 7412  |
| Ncoa2         | A_52_P335636 | NM_008678    | nuclear receptor coactivator 2               | -1.111 | 57.76 | 0.67054 | 17075 P | 1.038  | 28.13 | 0.36915 | 7156  |
| Xab2          | A_51_P392147 | NM_026156    | XPA binding protein 2                        | -1.111 | 72.2  | 0.80715 | 24528 P | 1.041  | 30.75 | 0.48832 | 8424  |
| Akap12        | A_51_P342567 | NM_031185    | A kinase (PRKA) anchor protein (gravin) 1    | -1.112 | 77.44 | 0.90581 | 22737 M | 1.115  | 5.75  | 0.04247 | 1594  |
| Atp5l         | A_52_P75415  | NM_013795    | ATP synthase, H+ transporting, mitochond     | -1.112 | 69.29 | 0.83762 | 19988 M | 1.057  | 25.31 | 0.39973 | 7510  |
| Cirbp         | A_51_P272106 | NM_007705    | cold inducible RNA binding protein           | -1.112 | 79.26 | 0.94067 | 24483 M | 1.002  | 42.43 | 0.98749 | 12959 |
| Dbi           | A_51_P399697 | NM_001037999 | diazepam binding inhibitor                   | -1.112 | 79.26 | 0.93654 | 29411 P | 1.157  | 9.71  | 0.21849 | 5176  |
| Gps2          | A_51_P320782 | NM_019726    | G protein pathway suppressor 2               | -1.112 | 72.2  | 0.81518 | 25089 P | 1.033  | 33.49 | 0.56248 | 9130  |
| Gtf3c5        | A_51_P105810 | NM_148928    | general transcription factor IIIC, polypept  | -1.112 | 75.14 | 0.84587 | 27467 P | -1.124 | 3.82  | 0.04561 | 1710  |
| Ptger1        | A_51_P144303 | NM_013641    |                                              | -1.112 |       | 0.89165 | 19221 A | -1.255 | 0.75  | 0.01985 | 849   |
| Rad23a        | A_52_P48206  | NM_009010    | RAD23a homolog (S. cerevisiae)               | -1.112 | 72.2  | 0.78885 | 23377 P | -1.01  | 49.48 | 0.89905 | 12056 |
| Ak2           | A_52_P68101  | NM_016895    | adenylate kinase 2                           | -1.114 | 69.29 | 0.7366  | 20504 P | 1.188  | 4.63  | 0.0698  | 2394  |
| H2afv         | A_51_P472630 | BC028539     | H2A histone family, member V                 | -1.114 | 72.2  | 0.82619 | 25766 P | 1.021  | 40.63 | 0.80165 | 11193 |
| Kdelr2        | A_52_P69998  | NM_025841    | KDEL (Lys-Asp-Glu-Leu) endoplasmic retic     | -1.114 | 77.44 | 0.89818 | 30920 P | 1.254  | 1.32  | 0.01222 | 495   |
| Lrp10         | A_51_P430357 | NM_022993    | low-density lipoprotein receptor-related p   | -1.114 | 61.79 | 0.67864 | 17388 P | 1.065  | 16.2  | 0.17514 | 4482  |
| Nola2         | A_52_P313813 | NM_026631    | nucleolar protein family A, member 2         | -1.114 | 75.14 | 0.84699 | 27549 P | 1.027  | 36.07 | 0.59225 | 9355  |
| Nrd1          | A_52_P51783  | NM_146150    | nardilysin, N-arginine dibasic convertase,   | -1.114 | 65.79 | 0.71509 | 19222 P | 1.058  | 25.31 | 0.42028 | 7731  |
| Pip5k2b       | A_52_P307893 | NM_054051    | phosphatidylinositol-4-phosphate 5-kinas     | -1.114 | 69.29 | 0.74985 | 21061 P | 1.031  | 36.07 | 0.66214 | 9990  |
| Plp2          | A_51_P243532 | NM_019755    | proteolipid protein 2                        | -1.114 | 69.29 | 0.77139 | 22283 P | 1.138  | 3.82  | 0.02825 | 1146  |
| 0610009J22Rik | A_51_P208019 | NM_027859    | ring finger protein 215                      | -1.115 | 77.44 | 0.90462 | 31401 P | 1.134  | 5.75  | 0.04332 | 1621  |
| 2010311D03Rik | A_51_P236721 | NM_133839    | RIKEN cDNA 2010311D03 gene                   | -1.115 | 65.79 | 0.70849 | 18868 P | 1.094  | 11.33 | 0.13196 | 3709  |
| 2410004P03Rik | A_51_P217415 | XM_126830    | RIKEN cDNA 2410004P03 gene                   | -1.115 | 69.29 | 0.78046 | 22793 P | -1.022 | 47.92 | 0.64396 | 9829  |
| Abcf1         | A_51_P107234 | NM_013854    | ATP-binding cassette, sub-family F (GCN2)    | -1.115 | 72.2  | 0.82007 | 25417 P | 1.042  | 30.75 | 0.59553 | 9403  |
| Cfi           | A_51_P496905 | NM_007686    | complement component factor i                | -1.115 | 79.26 | 0.93314 | 34072 P | -1.158 | 8.32  | 0.15789 | 4181  |
| Egr1          | A_51_P367866 | NM_007913    | early growth response 1                      | -1.115 | 77.44 | 0.9087  | 22876 M | 1.365  | 3.01  | 0.10198 | 3147  |
| Foxb1         | A_52_P345229 | NM_022378    | forkhead box B1                              | -1.115 |       | 0.92778 | 20974 A | 1.01   | 42.43 | 0.93029 | 12391 |
| Gdi1          | A_51_P391276 | NM_010273    | guanosine diphosphate (GDP) dissociation     | -1.115 | 72.2  | 0.79372 | 23733 P | 1.213  | 1.62  | 0.01203 | 487   |
| Gnb2          | A_51_P140311 | NM_010312    | guanine nucleotide binding protein, beta     | -1.115 | 69.29 | 0.73504 | 20449 P | 1.182  | 11.33 | 0.29992 | 6316  |
| Hnrpu         | A_51_P324393 | NM_016805    | heterogeneous nuclear ribonucleoprotein      | -1.115 | 69.29 | 0.74317 | 20729 P | 1.12   | 8.32  | 0.08448 | 2772  |
| Hsd17b1       | A_51_P243435 | NM_010475    | hydroxysteroid (17-beta) dehydrogenase       | -1.115 | 57.76 | 0.70619 | 17766 M | 1.068  | 13.58 | 0.13909 | 3833  |
| Robo4         | A_51_P138939 | NM_028783    | roundabout homolog 4 (Drosophila)            | -1.115 | 72.2  | 0.81981 | 25406 P | 1.004  | 42.43 | 0.94341 | 12515 |
| Ube4b         | A_52_P614582 | NM_022022    | ubiquitination factor E4B, UFD2 homolog      | -1.115 | 72.2  | 0.81096 | 24766 P | 1.118  | 11.33 | 0.19896 | 4882  |
| 2210403K04Rik | A_51_P144801 | AK008813     | RIKEN cDNA 2210403K04 gene                   | -1.116 | 75.14 | 0.87933 | 29619 P | 1.105  | 6.98  | 0.05898 | 2105  |
| 5133400G04Rik | A_51_P297388 | NM_027733    | RIKEN cDNA 5133400G04 gene                   | -1.116 | 72.2  | 0.80691 | 24509 P | -1.3   | 0.51  | 0.00636 | 171   |
| Arl6ip5       | A_51_P259902 | NM_022992    | ADP-ribosylation factor-like 6 interacting p | -1.116 | 72.2  | 0.8666  | 21049 M | 1.217  | 3.46  | 0.05374 | 1971  |
| Ivd           | A_52_P550069 | NM_019826    | isovaleryl coenzyme A dehydrogenase          | -1.116 | 65.79 | 0.71658 | 19314 P | 1.067  | 22.1  | 0.43315 | 7876  |
| Rab4b         | A_51_P258620 | NM_029391    | RAB4B, member RAS oncogene family            | -1.116 | 61.79 | 0.68027 | 17451 P | 1.053  | 19.02 | 0.24252 | 5532  |
| Tsta3         | A_51_P210928 | NM_031201    | tissue specific transplantation antigen P3   | -1.116 | 75.14 | 0.85117 | 27811 P | -1.064 | 28.13 | 0.178   | 4537  |
| Fah           | A_52_P302496 | NM_010176    | fumarylacetoacetate hydrolase                | -1.117 | 72.2  | 0.78653 | 23160 P | 1.012  | 42.43 | 0.80843 | 11268 |
| Lyn           | A_51_P345422 | NM_010747    | Yamaguchi sarcoma viral (v-yes-1) oncoge     | -1.117 | 79.26 | 0.92203 | 33202 P | -1.034 | 45.68 | 0.55948 | 9101  |

|               |              |              |                                            |        |       |         |         |        |       |         |       |
|---------------|--------------|--------------|--------------------------------------------|--------|-------|---------|---------|--------|-------|---------|-------|
| Nmi           | A_51_P125067 | NM_019401    | N-myc (and STAT) interactor                | -1.117 | 77.44 | 0.88448 | 29960 P | 1.221  | 5.75  | 0.14657 | 3975  |
| Ptch1         | A_51_P127435 | NM_008957    | patched homolog 1                          | -1.117 |       | 0.81031 | 18154 A | 1.006  | 42.43 | 0.90511 | 12149 |
| Slc15a4       | A_51_P301023 | NM_133895    | solute carrier family 15, member 4         | -1.117 | 61.79 | 0.67001 | 17032 P | 1.063  | 19.02 | 0.21441 | 5106  |
| Slc25a19      | A_51_P467006 | NM_026071    | solute carrier family 25 (mitochondrial th | -1.117 | 61.79 | 0.68137 | 17489 P | -1.087 | 30.75 | 0.32591 | 6625  |
| Sos2          | A_51_P371152 | XM_127051    | Son of sevenless homolog 2 (Drosophila)    | -1.117 | 69.29 | 0.77591 | 22517 P | 1.058  | 25.31 | 0.45679 | 8065  |
| 2610203E10Rik | A_52_P625277 | NM_183220    | RIKEN cDNA 2610203E10 gene                 | -1.119 | 75.14 | 0.85577 | 28116 P | -1.109 | 6.98  | 0.06339 | 2244  |
| Alg5          | A_51_P387342 | NM_025442    | asparagine-linked glycosylation 5 homolo   | -1.119 | 69.29 | 0.81506 | 18678 M | 1.114  | 11.33 | 0.16984 | 4381  |
| Brd2          | A_51_P295652 | NM_001025387 | bromodomain containing 2                   | -1.119 | 72.2  | 0.86423 | 20949 M | 1.107  | 8.32  | 0.07863 | 2616  |
| C030007I09Rik | A_52_P333487 | AK046449     |                                            | -1.119 | 69.29 | 0.75902 | 21556 P | 1.02   | 38.4  | 0.71731 | 10464 |
| Cd59a         | A_52_P40257  | NM_007652    | CD59a antigen                              | -1.119 | 77.44 | 0.88842 | 30159 P | 1.033  | 33.49 | 0.551   | 9039  |
| Fbxo9         | A_51_P312846 | NM_023605    | f-box protein 9                            | -1.119 | 72.2  | 0.86562 | 21006 M | 1.064  | 19.02 | 0.26923 | 5939  |
| Gpc4          | A_52_P480532 | AK020640     | glypican 4                                 | -1.119 | 75.14 | 0.86918 | 21173 M | -1.017 | 49.48 | 0.73205 | 10591 |
| HnrpII        | A_52_P103377 | BC071184     | heterogeneous nuclear ribonucleoprotein    | -1.119 | 75.14 | 0.86758 | 28713 P | 1.079  | 13.58 | 0.18771 | 4694  |
| Mbnl2         | A_51_P494361 | NM_175341    | muscleblind-like 2                         | -1.119 | 57.76 | 0.65163 | 16155 P | 1.042  | 33.49 | 0.63655 | 9776  |
| Ssr2          | A_51_P314264 | NM_025448    | signal sequence receptor, beta             | -1.119 | 75.14 | 0.85913 | 26561 P | -1.058 | 43.15 | 0.49966 | 8573  |
| Syngn2        | A_51_P105986 | NM_009304    | synaptogyrin 2                             | -1.119 | 72.2  | 0.80842 | 24625 P | -1.1   | 16.2  | 0.14642 | 3971  |
| 5930436O19Rik | A_52_P514850 | AK041816     |                                            | -1.12  | 72.2  | 0.81183 | 24813 P | 1.126  | 11.33 | 0.19142 | 4760  |
| BC033915      | A_51_P124467 | BC063268     | cDNA sequence BC033915                     | -1.12  | 77.44 | 0.90268 | 31224 P | 1.013  | 40.63 | 0.76651 | 10911 |
| Cggbp1        | A_52_P620641 | NM_178647    | CGG triplet repeat binding protein 1       | -1.12  | 65.79 | 0.70237 | 18530 P | 1.076  | 22.1  | 0.44001 | 7921  |
| Cnp1          | A_51_P232901 | NM_009923    | cyclic nucleotide phosphodiesterase 1      | -1.12  | 75.14 | 0.85533 | 28010 P | 1.022  | 38.4  | 0.63989 | 9809  |
| Cxhc1         | A_51_P262533 | NM_028868    | CXHC finger 1 (PHD domain)                 | -1.12  | 72.2  | 0.79338 | 23696 P | -1.015 | 49.48 | 0.75721 | 10840 |
| Lsm2          | A_52_P434038 | NM_030597    | LSM2 homolog, U6 small nuclear RNA ass     | -1.12  | 65.79 | 0.72855 | 20148 P | -1.003 | 49.48 | 0.94016 | 12478 |
| Tbp           | A_51_P461828 | BC012685     | TATA box binding protein                   | -1.12  | 69.29 | 0.76748 | 22078 P | 1.207  | 3.46  | 0.04606 | 1731  |
| Fzd5          | A_52_P224125 | NM_022721    | frizzled homolog 5 (Drosophila)            | -1.121 | 69.29 | 0.77139 | 22291 P | 1.083  | 11.33 | 0.10199 | 3153  |
| Kif2c         | A_51_P135092 | NM_134471    | kinesin family member 2C                   | -1.121 | 65.79 | 0.72307 | 19910 P | -1.063 | 42.43 | 0.48221 | 8345  |
| Ppp2r3a       | A_51_P492625 | AK054122     | protein phosphatase 2 (formerly 2A), regu  | -1.121 | 72.2  | 0.81686 | 25214 P | 1.024  | 38.4  | 0.70351 | 10344 |
| Sqrd1         | A_51_P209261 | NM_021507    | sulfide quinone reductase-like (yeast)     | -1.121 | 72.2  | 0.81362 | 24950 P | 1.058  | 16.2  | 0.19569 | 4832  |
| Stx7          | A_51_P363719 | NM_016797    | syntaxin 7                                 | -1.121 | 75.14 | 0.86908 | 21171 M | 1.006  | 42.43 | 0.89971 | 12061 |
| 1500034J01Rik | A_52_P407854 | BC093523     | RIKEN cDNA 1500034J01 gene                 | -1.122 | 61.79 | 0.66573 | 16870 P | 1.082  | 11.33 | 0.11809 | 3438  |
| Antxr2        | A_51_P142515 | NM_133738    | anthrax toxin receptor 2                   | -1.122 | 75.14 | 0.86086 | 28271 P | 1.05   | 25.31 | 0.35425 | 6941  |
| Cds1          | A_51_P479696 | NM_173370    | CDP-diaclyglycerol synthase 1              | -1.122 | 65.79 | 0.71858 | 19442 P | 1.074  | 22.1  | 0.44318 | 7946  |
| D14ErtD500e   | A_51_P214306 | NM_145462    | DNA segment, Chr 14, ERATO Doi 500, ex     | -1.122 | 72.2  | 0.83461 | 26611 P | -1.324 | 0.51  | 0.0067  | 202   |
| Hgs           | A_51_P460633 | NM_008244    | HGF-regulated tyrosine kinase substrate    | -1.122 | 72.2  | 0.80419 | 24361 P | 1.006  | 42.43 | 0.93149 | 12402 |
| Lamc1         | A_51_P199354 | NM_010683    | laminin, gamma 1                           | -1.122 | 69.29 | 0.77954 | 22710 P | 1.149  | 8.32  | 0.14179 | 3880  |
| Rcn3          | A_52_P223618 | NM_026555    | reticulocalbin 3, EF-hand calcium binding  | -1.122 | 72.2  | 0.78942 | 23392 P | -1.061 | 33.49 | 0.25423 | 5726  |
| Ubqln1        | A_51_P504105 | NM_152234    | ubiquilin 1                                | -1.122 | 61.79 | 0.68577 | 17709 P | 1.217  | 3.82  | 0.05962 | 2139  |
| Wnt2b         | A_52_P403173 | NM_009520    | wingless related MMTV integration site 2   | -1.122 | 69.29 | 0.77237 | 22358 P | -1.02  | 48.39 | 0.6543  | 9912  |
| 6030468B19Rik | A_51_P371536 | AK020081     | RIKEN cDNA 6030468B19 gene                 | -1.124 | 75.14 | 0.84288 | 25421 M | -1.027 | 46.3  | 0.5554  | 9066  |
| Atad3a        | A_51_P244356 | NM_179203    | ATPase family, AAA domain containing 3A    | -1.124 | 75.14 | 0.86489 | 28512 P | -1.025 | 47.43 | 0.61571 | 9585  |
| Cables1       | A_51_P117581 | NM_022021    | Cdk5 and Abl enzyme substrate 1            | -1.124 | 69.29 | 0.7763  | 22542 P | -1.003 | 49.48 | 0.94963 | 12581 |
| Cebpz         | A_52_P533350 | NM_001024806 | CCAAT/enhancer binding protein zeta        | -1.124 | 72.2  | 0.79703 | 23923 P | 1.015  | 40.63 | 0.78484 | 11049 |
| Nsun2         | A_52_P365768 | NM_145354    | NOL1/NOP2/Sun domain family 2              | -1.124 | 61.79 | 0.657   | 16429 P | 1.006  | 42.43 | 0.92273 | 12316 |
| Plcb4         | A_52_P137415 | NM_013829    | phospholipase C, beta 4                    | -1.124 | 65.79 | 0.72752 | 20078 P | 1.083  | 13.58 | 0.18501 | 4653  |
| Ppp1r16a      | A_52_P110157 | NM_033371    | protein phosphatase 1, regulatory (inhibi  | -1.124 | 65.79 | 0.72456 | 19973 P | -1.049 | 44.4  | 0.59709 | 9416  |
| Smn1          | A_51_P453502 | NM_011420    | survival motor neuron 1                    | -1.124 | 72.2  | 0.83244 | 26258 P | -1.148 | 2.53  | 0.03732 | 1419  |
| 4933440N22Rik | A_51_P300054 | XM_986054    | RIKEN cDNA 4933440N22 gene                 | -1.125 | 72.2  | 0.80507 | 24418 P | -1.018 | 49.48 | 0.74619 | 10754 |
| Amotl2        | A_51_P348804 | NM_019764    | angiominin like 2                          | -1.125 | 65.79 | 0.71259 | 19086 P | 1.107  | 9.71  | 0.13497 | 3764  |
| Atf3          | A_52_P452689 | NM_007498    | activating transcription factor 3          | -1.125 | 79.26 | 0.94006 | 34584 P | -1.037 | 48.39 | 0.78837 | 11075 |
| Clec2d        | A_51_P324690 | NM_053109    | C-type lectin domain family 2, member d    | -1.125 | 75.14 | 0.85336 | 27937 P | 1.005  | 42.43 | 0.92969 | 12386 |
| Ddx6          | A_52_P573497 | NM_181324    | DEAD (Asp-Glu-Ala-Asp) box polypeptide     | -1.125 | 65.79 | 0.75941 | 17799 M | 1.065  | 25.31 | 0.43044 | 7832  |
| Sacm1l        | A_51_P519385 | NM_030692    | SAC1 (suppressor of actin mutations 1, ho  | -1.125 | 61.79 | 0.77781 | 17136 M | 1.008  | 42.43 | 0.88809 | 11942 |
| Wdr5          | A_51_P390437 | NM_080848    | WD repeat domain 5                         | -1.125 | 65.79 | 0.71449 | 19186 P | -1.059 | 30.75 | 0.21086 | 5050  |
| Actr3         | A_51_P217535 | NM_023735    | ARP3 actin-related protein 3 homolog (ye   | -1.126 | 72.2  | 0.84728 | 20405 M | 1.108  | 11.33 | 0.15788 | 4179  |

|               |              |                    |                                            |        |       |         |         |        |       |         |       |
|---------------|--------------|--------------------|--------------------------------------------|--------|-------|---------|---------|--------|-------|---------|-------|
| Cs            | A_52_P182659 | NM_026444          | citrate synthase                           | -1.126 | 65.79 | 0.71449 | 18155 P | -1.015 | 49.48 | 0.80495 | 11218 |
| Dpf2          | A_51_P372874 | NM_011262          | D4, zinc and double PHD fingers family 2   | -1.126 | 72.2  | 0.80051 | 24118 P | 1.042  | 25.31 | 0.34979 | 6871  |
| Eml4          | A_51_P117832 | NM_199466          | echinoderm microtubule associated prote    | -1.126 | 65.79 | 0.69309 | 18065 P | 1.095  | 13.58 | 0.23654 | 5444  |
| Rab35         | A_51_P354572 | NM_198163          | RAB35, member RAS oncogene family          | -1.126 | 69.29 | 0.78077 | 22806 P | 1.151  | 4.63  | 0.04332 | 1622  |
| Rfc4          | A_51_P378450 | NM_145480          | replication factor C (activator 1) 4       | -1.126 | 65.79 | 0.68811 | 17839 P | 1.015  | 42.43 | 0.79994 | 11175 |
| Rg9mntd3      | A_52_P185109 | NM_027266          | RNA (guanine-9-) methyltransferase dom     | -1.126 | 72.2  | 0.82097 | 25449 P | -1.139 | 2.53  | 0.03337 | 1301  |
| Syk           | A_51_P444934 | NM_011518          | spleen tyrosine kinase                     | -1.126 | 75.14 | 0.84399 | 27343 P | -1.259 | 0.56  | 0.01073 | 416   |
| Atp9a         | A_52_P276840 | NM_015731          | ATPase, class II, type 9A                  | -1.127 | 65.79 | 0.7167  | 19320 P | -1.587 | 0     | 0.00584 | 25    |
| BC038479      | A_51_P104197 | NM_153803          | cDNA sequence BC038479                     | -1.127 | 69.29 | 0.78278 | 22923 P | 1.099  | 13.58 | 0.24328 | 5557  |
| Bckdk         | A_52_P404413 | NM_009739          | branched chain ketoacid dehydrogenase I    | -1.127 | 65.79 | 0.6989  | 18319 P | -1.169 | 2.04  | 0.03496 | 1338  |
| Ccng2         | A_51_P360165 | NM_007635          | cyclin G2                                  | -1.127 | 72.2  | 0.80585 | 24460 P | -1.108 | 8.32  | 0.07566 | 2552  |
| Cog3          | A_51_P499153 | NM_177381          | component of oligomeric golgi complex 3    | -1.127 | 65.79 | 0.79007 | 17572 M | -1.145 | 4.63  | 0.06923 | 2381  |
| Ddb2          | A_52_P3825   | NM_028119          | damage specific DNA binding protein 2      | -1.127 | 72.2  | 0.81591 | 25146 P | 1.025  | 40.63 | 0.84626 | 11580 |
| Fbxl8         | A_51_P120254 | NM_015821          | F-box and leucine-rich repeat protein 8    | -1.127 | 75.14 | 0.84427 | 27356 P | 1.04   | 30.75 | 0.56318 | 9135  |
| G6pc          | A_51_P462385 | NM_008061          | glucose-6-phosphatase, catalytic           | -1.127 | 69.29 | 0.76244 | 21782 P | 1.067  | 19.02 | 0.27923 | 6079  |
| Galm          | A_51_P136337 | NM_176963          | galactose mutarotase                       | -1.127 | 72.2  | 0.80281 | 24241 M | -1.197 | 1.1   | 0.01704 | 739   |
| Hsd17b12      | A_52_P243599 | NM_019657          | hydroxysteroid (17-beta) dehydrogenase     | -1.127 | 69.29 | 0.77214 | 22354 P | 1.023  | 42.43 | 0.8792  | 11852 |
| Mirg          | A_52_P277415 | AK077315           | miRNA containing gene                      | -1.127 | 72.2  | 0.82449 | 25681 P | 1.154  | 9.71  | 0.17832 | 4543  |
| Mrps7         | A_51_P193302 | NM_025305          | mitochondrial ribosomal protein S7         | -1.127 | 72.2  | 0.81287 | 24896 P | -1.094 | 22.1  | 0.13728 | 3484  |
| Pkmyt1        | A_51_P312360 | ENSMUST00000024701 | protein kinase, membrane associated tyro   | -1.127 | 75.14 | 0.84099 | 27157 P | 1.01   | 42.43 | 0.85616 | 11636 |
| Pmpca         | A_52_P504302 | NM_173180          | peptidase (mitochondrial processing) alpl  | -1.127 | 65.79 | 0.71134 | 19035 P | 1.138  | 3.82  | 0.03188 | 1256  |
| Tmem15        | A_51_P284966 | NM_177648          | dolichol kinase                            | -1.127 | 72.2  | 0.79435 | 23770 P | -1.128 | 3.46  | 0.0419  | 1581  |
| Tube1         | A_52_P242194 | AK039886           | epsilon-tubulin 1                          | -1.127 | 81.02 | 0.82602 | 18428 M | -1.042 | 43.75 | 0.47441 | 8253  |
| Ddx39         | A_51_P288162 | NM_197982          | DEAD (Asp-Glu-Ala-Asp) box polypeptide     | -1.129 | 69.29 | 0.7489  | 21013 P | 1.045  | 22.1  | 0.30267 | 6347  |
| Enpp1         | A_51_P231499 | NM_008813          | ectonucleotide pyrophosphatase/phosph      | -1.129 | 72.2  | 0.80436 | 24385 P | 1.084  | 13.58 | 0.15718 | 4166  |
| Gnmt          | A_51_P419439 | NM_010321          | glycine N-methyltransferase                | -1.129 | 61.79 | 0.64949 | 16077 P | 1.076  | 13.58 | 0.17491 | 4477  |
| Gprc5c        | A_52_P405460 | BC008228           | G protein-coupled receptor, family C, grou | -1.129 | 75.14 | 0.85933 | 28188 P | -1.159 | 2.04  | 0.0353  | 1361  |
| Mbd3          | A_51_P398004 | NM_013595          | methyl-CpG binding domain protein 3        | -1.129 | 69.29 | 0.76749 | 22079 P | -1.025 | 47.43 | 0.63197 | 9735  |
| Rnf10         | A_51_P202652 | NM_016698          | ring finger protein 10                     | -1.129 | 69.29 | 0.76088 | 21692 P | 1.089  | 13.58 | 0.19032 | 4733  |
| Ror2          | A_51_P234365 | NM_013846          | receptor tyrosine kinase-like orphan rece  | -1.129 | 79.26 | 0.9238  | 33372 P | 1.022  | 40.63 | 0.8037  | 11205 |
| Scyl1         | A_51_P498023 | NM_023912          | SCY1-like 1 (S. cerevisiae)                | -1.129 | 75.14 | 0.84931 | 27711 P | 1.127  | 5.75  | 0.04017 | 1534  |
| Slc25a17      | A_51_P181170 | NM_011399          | solute carrier family 25 (mitochondrial ca | -1.129 | 65.79 | 0.71359 | 19131 P | 1.094  | 11.33 | 0.10949 | 3250  |
| Slc43a1       | A_51_P362483 | BC053747           | solute carrier family 43, member 1         | -1.129 |       | 0.84855 | 20244 A | -1.211 | 1.1   | 0.01933 | 816   |
| Vars2l        | A_52_P185639 | NM_175137          | valyl-tRNA synthetase 2, mitochondrial (p  | -1.129 | 57.76 | 0.64092 | 15720 P | -1.197 | 1.18  | 0.02152 | 904   |
| Vhlh          | A_52_P670070 | S76748             | von Hippel-Lindau syndrome homolog         | -1.129 | 61.79 | 0.65604 | 16395 P | -1.015 | 49.48 | 0.82868 | 11440 |
| 2810007J24Rik | A_51_P189733 | NM_175250          | RIKEN cDNA 2810007J24 gene                 | -1.13  | 57.76 | 0.62667 | 14761 P | 1.078  | 19.02 | 0.30903 | 6428  |
| 6330549D23Rik | A_52_P225772 | NM_175469          | RIKEN cDNA 6330549D23 gene                 | -1.13  | 81.02 | 0.84873 | 24143 M | -1.039 | 45.05 | 0.5599  | 9106  |
| Agpat2        | A_51_P238565 | NM_026212          | 1-acylglycerol-3-phosphate O-acyltransfe   | -1.13  | 72.2  | 0.83252 | 26272 P | -1.193 | 3.46  | 0.09699 | 3032  |
| Alg8          | A_52_P651371 | NM_199035          | asparagine-linked glycosylation 8 homolo   | -1.13  | 49.93 | 0.60581 | 13713 P | -1.03  | 46.85 | 0.63229 | 9743  |
| Cib1          | A_51_P175454 | NM_011870          | calcium and integrin binding 1 (calmyrin)  | -1.13  | 69.29 | 0.7823  | 22881 P | 1.015  | 40.63 | 0.73436 | 10622 |
| Ddx42         | A_52_P346367 | NM_028074          | DEAD (Asp-Glu-Ala-Asp) box polypeptide     | -1.13  | 72.2  | 0.81062 | 24730 P | -1.091 | 22.1  | 0.20743 | 5020  |
| Dffa          | A_52_P586539 | NM_001025296       | DNA fragmentation factor, alpha subunit    | -1.13  | 69.29 | 0.76568 | 21950 P | 1.11   | 13.58 | 0.24876 | 5628  |
| Hoxa10        | A_51_P466285 | NM_008263          | homeo box A10                              | -1.13  | 79.26 | 0.93324 | 31569 M | 1.065  | 16.2  | 0.17381 | 4446  |
| Ier3          | A_51_P286488 | NM_133662          | immediate early response 3                 | -1.13  | 75.14 | 0.88077 | 29704 P | 1.349  | 6.98  | 0.27762 | 6058  |
| Tradd         | A_51_P288505 | NM_001033161       | TNFRSF1A-associated via death domain       | -1.13  | 72.2  | 0.79136 | 23551 P | 1.028  | 36.07 | 0.59408 | 9375  |
| Zfp57         | A_51_P197925 | NM_001013745       | zinc finger protein 57                     | -1.13  | 69.29 | 0.75532 | 20417 M | 1.006  | 42.43 | 0.91179 | 12202 |
| B4galt6       | A_51_P122268 | NM_019737          | UDP-Gal:betaGlcNAc beta 1,4-galactosylt    | -1.131 | 69.29 | 0.76088 | 21686 P | 1.149  | 6.98  | 0.08414 | 2751  |
| Ccnf          | A_51_P328333 | NM_007634          | cyclin F                                   | -1.131 | 69.29 | 0.73731 | 19337 M | -1.226 | 0.75  | 0.01515 | 647   |
| Cyln2         | A_52_P360112 | NM_009990          | CAP-GLY domain containing linker protein   | -1.131 | 75.14 | 0.8411  | 27173 P | 1.034  | 36.07 | 0.68921 | 10230 |
| Ski           | A_51_P301508 | NM_011385          | Sloan-Kettering viral oncogene homolog     | -1.131 | 65.79 | 0.69069 | 17952 P | 1.08   | 13.58 | 0.13156 | 3701  |
| Sln           | A_51_P297498 | NM_025540          | sarcolipin                                 | -1.131 |       | 0.94728 | 13948 A | 1.045  | 25.31 | 0.31396 | 6511  |
| Zfp219        | A_52_P512329 | NM_027248          | zinc finger protein 219                    | -1.131 | 65.79 | 0.75215 | 20214 M | 1.231  | 2.53  | 0.0225  | 956   |
| 9930021J03Rik | A_52_P671502 | AK047515           | RIKEN cDNA 9930021J03 gene                 | -1.133 | 65.79 | 0.69872 | 18312 P | 1.019  | 40.63 | 0.71961 | 10494 |

|               |              |                    |                                                     |        |       |         |         |        |       |         |       |
|---------------|--------------|--------------------|-----------------------------------------------------|--------|-------|---------|---------|--------|-------|---------|-------|
| Csf3          | A_51_P317176 | NM_009971          | colony stimulating factor 3 (granulocyte)           | -1.133 | 79.26 | 0.7823  | 18438 M | 1.053  | 19.02 | 0.25085 | 5659  |
| Nr1d2         | A_52_P303891 | NM_011584          | nuclear receptor subfamily 1, group D, member 2     | -1.133 | 69.29 | 0.82214 | 18999 M | 1.105  | 8.32  | 0.0698  | 2393  |
| Ppp4r2        | A_52_P212887 | NM_182939          | protein phosphatase 4, regulatory subunit 1         | -1.133 | 65.79 | 0.79365 | 17755 M | 1.191  | 3.82  | 0.04689 | 1749  |
| Rassf5        | A_51_P275679 | NM_018750          | Ras association (RalGDS/AF-6) domain family 5       | -1.133 | 61.79 | 0.67089 | 17094 P | 1.058  | 28.13 | 0.52299 | 8780  |
| Stard7        | A_51_P390496 | NM_139308          | START domain containing 7                           | -1.133 | 61.79 | 0.7704  | 16872 M | 1.167  | 4.63  | 0.05612 | 2035  |
| 5630401D24Rik | A_51_P125567 | NM_144877          | RIKEN cDNA 5630401D24 gene                          | -1.134 | 61.79 | 0.65421 | 16317 P | 1.07   | 13.58 | 0.14341 | 3913  |
| Akap8         | A_51_P176549 | NM_019774          | A kinase (PRKA) anchor protein 8                    | -1.134 | 69.29 | 0.82282 | 19072 M | 1.06   | 30.75 | 0.6297  | 9711  |
| Cdca7         | A_51_P202857 | NM_025866          | cell division cycle associated 7                    | -1.134 | 72.2  | 0.79919 | 24055 P | -1.325 | 0.51  | 0.00584 | 64    |
| Ell           | A_51_P292943 | NM_007924          | elongation factor RNA polymerase II                 | -1.134 | 72.2  | 0.83384 | 26400 P | 1.056  | 19.02 | 0.23119 | 5366  |
| Fhod1         | A_51_P495379 | NM_177699          | formin homology 2 domain containing 1               | -1.134 | 65.79 | 0.68725 | 17784 P | 1.045  | 28.13 | 0.40407 | 7560  |
| Pias1         | A_51_P312166 | NM_019663          | protein inhibitor of activated STAT 1               | -1.134 | 69.29 | 0.77853 | 22680 P | 1.001  | 42.43 | 0.9888  | 12974 |
| Qtrtd1        | A_52_P392742 | NM_029128          | queuine tRNA-ribosyltransferase domain              | -1.134 | 57.76 | 0.62794 | 14851 P | -1.12  | 9.71  | 0.11175 | 3311  |
| 1200009F10Rik | A_52_P417694 | NM_027078          | RIKEN cDNA 1200009F10 gene                          | -1.135 | 72.2  | 0.81301 | 24912 P | 1.079  | 16.2  | 0.24038 | 5492  |
| 2810026P18Rik | A_52_P522166 | BU509931           |                                                     | -1.135 | 61.79 | 0.66142 | 16644 P | 1.005  | 42.43 | 0.9313  | 12396 |
| BC017158      | A_51_P304510 | NM_145590          | cDNA sequence BC017158                              | -1.135 | 72.2  | 0.83095 | 26107 P | 1.027  | 38.4  | 0.73228 | 10605 |
| Lamb1-1       | A_51_P244287 | NM_008482          | laminin B1 subunit 1                                | -1.135 | 65.79 | 0.698   | 18268 P | -1.045 | 44.4  | 0.55422 | 9055  |
| Tmpo          | A_51_P328926 | NM_011605          | thymopoietin                                        | -1.135 | 69.29 | 0.7491  | 21047 P | 1.089  | 9.71  | 0.08651 | 2813  |
| A530041M06Rik | A_52_P739394 | AK040901           | RIKEN cDNA A530041M06 gene                          | -1.136 | 49.93 | 0.59503 | 13235 P | 1.083  | 22.1  | 0.4643  | 8151  |
| Alas1         | A_52_P129756 | NM_020559          | aminolevulinic acid synthase 1                      | -1.136 | 61.79 | 0.65572 | 16366 P | -1.037 | 45.05 | 0.48934 | 8431  |
| Fubp3         | A_51_P268297 | NM_001033389       | far upstream element (FUSE) binding protein 3       | -1.136 | 61.79 | 0.75861 | 16417 M | -1.037 | 44.4  | 0.48664 | 8401  |
| Hnrpdl        | A_51_P476091 | ENSMUST00000031271 | heterogeneous nuclear ribonucleoprotein             | -1.136 | 75.14 | 0.77148 | 21164 P | 1.104  | 13.58 | 0.23887 | 5468  |
| Hnrph2        | A_51_P333885 | NM_019868          | heterogeneous nuclear ribonucleoprotein             | -1.136 | 69.29 | 0.82279 | 19068 M | 1.116  | 9.71  | 0.14791 | 4000  |
| Igfals        | A_51_P277088 | NM_008340          | insulin-like growth factor binding protein, alpha-5 | -1.136 | 75.14 | 0.85319 | 27927 P | 1.007  | 42.43 | 0.88957 | 11961 |
| Slc27a4       | A_52_P61854  | NM_011989          | solute carrier family 27 (fatty acid transporter)   | -1.136 | 53.87 | 0.60358 | 13607 P | -1.027 | 45.68 | 0.52549 | 8805  |
| Yeats4        | A_51_P342227 | NM_026570          | YEATS domain containing 4                           | -1.136 | 61.79 | 0.7682  | 16801 M | 1.188  | 11.33 | 0.32966 | 6658  |
| 1200011M11Rik | A_52_P238902 | NM_024262          | RIKEN cDNA 1200011M11 gene                          | -1.138 | 69.29 | 0.77253 | 22363 P | -1.02  | 49    | 0.71217 | 10419 |
| 4922503N01Rik | A_51_P342126 | NM_153392          | RIKEN cDNA 4922503N01 gene                          | -1.138 | 72.2  | 0.79613 | 23876 P | -1.094 | 22.1  | 0.20568 | 4984  |
| 5730536A07Rik | A_51_P327530 | NM_026635          | RIKEN cDNA 5730536A07 gene                          | -1.138 | 69.29 | 0.75606 | 21452 P | -1.094 | 28.13 | 0.30427 | 6376  |
| Bmi1          | A_51_P121547 | NM_007552          | Bmi1 polycomb ring finger oncogene                  | -1.138 | 69.29 | 0.74163 | 20677 P | 1.004  | 42.43 | 0.94576 | 12550 |
| Cldn5         | A_51_P189814 | NM_013805          | claudin 5                                           | -1.138 | 75.14 | 0.84664 | 27539 P | 1.056  | 22.1  | 0.26935 | 5942  |
| Hn1           | A_51_P247157 | NM_008258          | hematological and neurological expressed            | -1.138 | 72.2  | 0.83129 | 26133 P | -1.123 | 6.98  | 0.076   | 2553  |
| Siah1b        | A_51_P378602 | NM_009173          | seven in absentia 1B                                | -1.138 | 57.76 | 0.62767 | 14839 P | 1.011  | 42.43 | 0.88251 | 11889 |
| Traf7         | A_51_P172373 | NM_153792          | Tnf receptor-associated factor 7                    | -1.138 | 61.79 | 0.6531  | 16264 P | 1.129  | 11.33 | 0.27184 | 5979  |
| Ubb           | A_52_P606297 | NM_011664          | ubiquitin B                                         | -1.138 | 72.2  | 0.85387 | 20635 M | 1.079  | 19.02 | 0.31282 | 6487  |
| Ythdf2        | A_51_P271751 | NM_145393          | YTH domain family 2                                 | -1.138 | 61.79 | 0.7522  | 16151 M | 1.01   | 42.43 | 0.9166  | 12235 |
| Adck4         | A_51_P197209 | NM_133770          | aarF domain containing kinase 4                     | -1.139 | 65.79 | 0.69954 | 18353 P | -1.02  | 49    | 0.7056  | 10369 |
| Atf4          | A_52_P139727 | NM_009716          | activating transcription factor 4                   | -1.139 | 69.29 | 0.78948 | 23399 P | -1.049 | 43.15 | 0.46769 | 8186  |
| Cacnb1        | A_51_P478138 | NM_031173          | calcium channel, voltage-dependent, beta-1          | -1.139 | 65.79 | 0.7332  | 19136 M | -1.084 | 28.13 | 0.27425 | 6016  |
| Egln1         | A_51_P186899 | NM_053207          | EGL nine homolog 1 (C. elegans)                     | -1.139 | 69.29 | 0.77167 | 22347 P | 1.136  | 8.32  | 0.1313  | 3694  |
| Hnrpa2b1      | A_51_P419981 | AF073993           | heterogeneous nuclear ribonucleoprotein             | -1.139 | 72.2  | 0.83448 | 19721 M | -1.014 | 49.48 | 0.78783 | 11070 |
| Rab33a        | A_52_P66226  | NM_011228          | RAB33A, member of RAS oncogene family               | -1.139 | 84.56 | 0.89837 | 26865 P | 1.065  | 19.02 | 0.22137 | 5227  |
| Rb1           | A_51_P286665 | NM_011249          | retinoblastoma-like 1 (p107)                        | -1.139 | 69.29 | 0.7539  | 21315 P | 1.206  | 3.46  | 0.04256 | 1602  |
| Sh3bgrl2      | A_52_P316933 | NM_172507          | SH3 domain binding glutamic acid-rich protein       | -1.139 | 79.26 | 0.93324 | 34093 P | -1.087 | 30.75 | 0.33062 | 6681  |
| Tsc22d3       | A_51_P235816 | AF024519           | TSC22 domain family 3                               | -1.139 | 61.79 | 0.75588 | 16340 M | -1.242 | 5.75  | 0.21645 | 5140  |
| Actb          | A_51_P173760 | NM_007393          | actin, beta, cytoplasmic                            | -1.14  | 79.26 | 0.93538 | 24290 M | 1.172  | 3.82  | 0.0383  | 1458  |
| Bst2          | A_51_P169693 | NM_198095          | bone marrow stromal cell antigen 2                  | -1.14  | 65.79 | 0.71622 | 19288 P | 1.001  | 42.43 | 0.97325 | 12767 |
| Kif22         | A_51_P493467 | NM_145588          | kinesin family member 22                            | -1.14  | 65.79 | 0.721   | 19642 P | 1.003  | 42.43 | 0.95103 | 12596 |
| Ugcgl1        | A_51_P236775 | AK134231           | UDP-glucose ceramide glucosyltransferase            | -1.14  | 65.79 | 0.68448 | 17644 P | -1.142 | 3.82  | 0.05981 | 2144  |
| 1810073N04Rik | A_52_P145914 | NM_024249          | RIKEN cDNA 1810073N04 gene                          | -1.142 | 69.29 | 0.76604 | 21982 P | 1.03   | 33.49 | 0.49675 | 8537  |
| 2810013P06Rik | A_51_P255373 | AK077895           | RIKEN cDNA 2810013P06 gene                          | -1.142 | 57.76 | 0.73642 | 15673 M | 1.063  | 22.1  | 0.33807 | 6762  |
| D930010J01Rik | A_52_P559957 | NM_134147          | RIKEN cDNA D930010J01 gene                          | -1.142 | 77.44 | 0.89435 | 30608 P | 1.078  | 13.58 | 0.188   | 4697  |
| Impdh2        | A_51_P257898 | NM_011830          | inosine 5'-phosphate dehydrogenase 2                | -1.142 | 65.79 | 0.68819 | 17840 P | -1.106 | 16.2  | 0.1765  | 4508  |
| Med25         | A_52_P632227 | NM_029365          | mediator of RNA polymerase II transcription         | -1.142 | 75.14 | 0.85187 | 27847 P | -1.022 | 47.92 | 0.62498 | 9671  |

|               |              |              |                                              |        |       |         |         |        |       |         |       |
|---------------|--------------|--------------|----------------------------------------------|--------|-------|---------|---------|--------|-------|---------|-------|
| Cyp2c70       | A_51_P134142 | NM_145499    | cytochrome P450, family 2, subfamily c, p    | -1.143 | 72.2  | 0.78753 | 21906 M | -1.036 | 45.05 | 0.49593 | 8519  |
| Ninj1         | A_51_P295046 | NM_013610    | ninjurin 1                                   | -1.143 | 53.87 | 0.60279 | 13573 P | 1.009  | 42.43 | 0.91797 | 12248 |
| Rif1          | A_51_P439711 | NM_175238    | Rap1 interacting factor 1 homolog (yeast)    | -1.143 | 57.76 | 0.60363 | 13610 P | -1.096 | 38.4  | 0.5353  | 8891  |
| Zfp523        | A_51_P222815 | NM_172617    | zinc finger protein 523                      | -1.143 | 65.79 | 0.68868 | 17848 P | 1.05   | 28.13 | 0.54903 | 9014  |
| Azi2          | A_52_P674847 | NM_013727    | 5-azacytidine induced gene 2                 | -1.144 | 72.2  | 0.79778 | 23982 P | -1.001 | 49.48 | 0.98039 | 12849 |
| Dhx9          | A_51_P369683 | NM_007842    | DEAH (Asp-Glu-Ala-His) box polypeptide 9     | -1.144 | 57.76 | 0.64806 | 14094 P | 1.095  | 9.71  | 0.0789  | 2628  |
| Galnt3        | A_51_P380005 | NM_015736    | UDP-N-acetyl-alpha-D-galactosamine:pol       | -1.144 | 77.44 | 0.92234 | 33209 P | 1.083  | 16.2  | 0.22642 | 5292  |
| Nes           | A_51_P452323 | NM_016701    | nestin                                       | -1.144 | 72.2  | 0.8435  | 27294 P | -1.061 | 28.13 | 0.18616 | 4673  |
| Seps2         | A_51_P418765 | NM_009266    | selenophosphate synthetase 2                 | -1.144 | 57.76 | 0.61013 | 13957 P | -1.221 | 0.92  | 0.01571 | 675   |
| Vegfa         | A_52_P249424 | NM_001025257 | vascular endothelial growth factor A         | -1.144 | 72.2  | 0.79763 | 23975 P | 1.087  | 16.2  | 0.2306  | 5360  |
| 2610002J23Rik | A_52_P328116 | AK164857     | RIKEN cDNA 2610002J23 gene                   | -1.145 | 45.92 | 0.56378 | 11825 P | -1.12  | 6.98  | 0.07798 | 2606  |
| 4931406I20Rik | A_51_P152222 | NM_025739    | RIKEN cDNA 4931406I20 gene                   | -1.145 | 69.29 | 0.77678 | 22558 P | 1.003  | 42.43 | 0.94908 | 12575 |
| Frem2         | A_51_P214503 | NM_172862    | Fras1 related extracellular matrix protein   | -1.145 |       | 0.89109 | 26460 A | -1.004 | 49.48 | 0.93771 | 12457 |
| Itih3         | A_51_P367100 | NM_008407    | inter-alpha trypsin inhibitor, heavy chain 3 | -1.145 | 61.79 | 0.70086 | 17492 M | 1.013  | 42.43 | 0.79013 | 11090 |
| Mfge8         | A_51_P255682 | NM_008594    | milk fat globule-EGF factor 8 protein        | -1.145 | 72.2  | 0.83817 | 27004 P | 1.18   | 3.46  | 0.03519 | 1355  |
| Nfya          | A_52_P550049 | BC057099     | nuclear transcription factor-Y alpha         | -1.145 | 65.79 | 0.72009 | 19557 P | 1.022  | 38.4  | 0.71928 | 10486 |
| Rgs19         | A_51_P388984 | NM_026446    | regulator of G-protein signaling 19          | -1.145 | 61.79 | 0.67    | 17028 P | -1.015 | 49.48 | 0.73696 | 10649 |
| 1110002B05Rik | A_52_P561936 | NM_134054    | RIKEN cDNA 1110002B05 gene                   | -1.147 | 65.79 | 0.70099 | 18436 P | 1.04   | 28.13 | 0.45323 | 8028  |
| Abcd3         | A_52_P394395 | NM_008991    | ATP-binding cassette, sub-family D (ALD),    | -1.147 | 69.29 | 0.82666 | 19209 M | 1.214  | 9.71  | 0.29461 | 6272  |
| Bcl7b         | A_51_P505412 | NM_009745    | B-cell CLL/lymphoma 7B                       | -1.147 | 65.79 | 0.70407 | 18640 P | 1.017  | 40.63 | 0.7285  | 10553 |
| C330021A05Rik | A_52_P71666  | NM_153082    | RIKEN cDNA C330021A05 gene                   | -1.147 | 49.93 | 0.78248 | 20112 M | -1.053 | 42.43 | 0.41585 | 7692  |
| Canx          | A_52_P337679 | NM_007597    | calnexin                                     | -1.147 | 72.2  | 0.82988 | 19378 M | 1.144  | 4.63  | 0.04432 | 1655  |
| Ggh           | A_51_P439970 | NM_010281    | gamma-glutamyl hydrolase                     | -1.147 | 65.79 | 0.70103 | 18439 P | 1.064  | 28.13 | 0.5331  | 8872  |
| Gss           | A_52_P358860 | NM_008180    | glutathione synthetase                       | -1.147 | 69.29 | 0.76244 | 21787 P | -1.377 | 0.51  | 0.00584 | 100   |
| Il11          | A_51_P267783 | NM_008350    | interleukin 11                               | -1.147 | 77.44 | 0.91097 | 32052 P | 1.16   | 3.82  | 0.03814 | 1447  |
| Pou3f1        | A_51_P511270 | NM_011141    | POU domain, class 3, transcription factor    | -1.147 |       | 0.93855 | 13704 A | 1.089  | 9.71  | 0.07994 | 2651  |
| Riok3         | A_52_P370443 | NM_024182    | RIO kinase 3 (yeast)                         | -1.147 | 72.2  | 0.7132  | 17097 P | 1.088  | 19.02 | 0.36214 | 7051  |
| Stx6          | A_52_P214891 | NM_021433    | syntaxin 6                                   | -1.147 | 72.2  | 0.7944  | 23782 P | 1.117  | 9.71  | 0.11002 | 3265  |
| Cnot2         | A_52_P12604  | NM_001037847 | CCR4-NOT transcription complex, subunit      | -1.148 | 61.79 | 0.63052 | 15158 P | 1.011  | 42.43 | 0.87447 | 11803 |
| Cypr1         | A_51_P462461 | NM_144853    | cysteine and tyrosine-rich protein 1         | -1.148 |       | 0.81778 | 18519 A | -1.031 | 45.68 | 0.53816 | 8920  |
| Ell3          | A_52_P382926 | NM_145973    | elongation factor RNA polymerase II-like 3   | -1.148 | 72.2  | 0.83857 | 27014 P | 1.001  | 42.43 | 0.98918 | 12978 |
| F3            | A_51_P236846 | NM_010171    | coagulation factor III                       | -1.148 | 75.14 | 0.84706 | 27555 P | 1.142  | 8.32  | 0.1419  | 3885  |
| Npdc1         | A_51_P154596 | NM_008721    | neural proliferation, differentiation and c  | -1.148 | 57.76 | 0.62552 | 14718 P | 1.061  | 22.1  | 0.38928 | 7387  |
| Odc1          | A_52_P7041   | NM_013614    | similar to Ornithine decarboxylase (ODC)     | -1.148 | 75.14 | 0.87252 | 29100 P | 1.255  | 3.46  | 0.06064 | 2168  |
| Rnf146        | A_52_P183071 | BC023104     | ring finger protein 146                      | -1.148 | 65.79 | 0.72835 | 20136 P | 1.091  | 19.02 | 0.35983 | 7009  |
| Rpn2          | A_52_P57651  | NM_019642    | ribophorin II                                | -1.148 | 69.29 | 0.75282 | 21253 P | 1.06   | 22.1  | 0.29981 | 6312  |
| Trim15        | A_52_P233342 | NM_001024134 | tripartite motif protein 15                  | -1.148 | 72.2  | 0.84228 | 27228 M | -1.22  | 0.56  | 0.00977 | 362   |
| Aqp2          | A_51_P492298 | NM_009699    | aquaporin 2                                  | -1.149 | 72.2  | 0.80242 | 24176 P | 1.168  | 2.53  | 0.01802 | 766   |
| Aup1          | A_51_P165984 | NM_007517    | ancient ubiquitous protein                   | -1.149 | 65.79 | 0.70239 | 18533 P | 1.005  | 42.43 | 0.91864 | 12261 |
| Mum111        | A_51_P418029 | NM_175541    | melanoma associated antigen (mutated)        | -1.149 | 72.2  | 0.82765 | 25867 P | 1.041  | 28.13 | 0.37743 | 7250  |
| Nup43         | A_52_P566055 | NM_145706    | nucleoporin 43                               | -1.149 | 69.29 | 0.76022 | 21634 P | 1.035  | 36.07 | 0.66894 | 10034 |
| Psmb9         | A_51_P369803 | NM_013585    | proteasome (prosome, macropain) subun        | -1.149 | 72.2  | 0.82914 | 25979 P | 1.003  | 42.43 | 0.96286 | 12690 |
| Ptdsr         | A_51_P332952 | NM_033398    | jumonji domain containing 6                  | -1.149 | 69.29 | 0.74208 | 20695 P | 1.122  | 6.98  | 0.05995 | 2154  |
| Rad1          | A_52_P278192 | NM_011232    | RAD1 homolog (S. pombe)                      | -1.149 | 72.2  | 0.79586 | 23860 P | 1.146  | 6.98  | 0.07211 | 2439  |
| Rnf130        | A_51_P398517 | NM_021540    | ring finger protein 130                      | -1.149 | 57.76 | 0.68397 | 15910 P | -1.035 | 44.4  | 0.45323 | 8029  |
| Srp54         | A_51_P420901 | NM_011899    | signal recognition particle 54               | -1.149 | 69.29 | 0.82559 | 19166 M | 1.121  | 13.58 | 0.32092 | 6575  |
| Tgif          | A_52_P257590 | NM_009372    | TG interacting factor 1                      | -1.149 | 65.79 | 0.68139 | 17495 P | 1.202  | 6.98  | 0.14469 | 3939  |
| 0610006I08Rik | A_51_P457492 | NM_025791    | RIKEN cDNA 0610006I08 gene                   | -1.151 | 61.79 | 0.66969 | 17014 P | -1.192 | 1.18  | 0.01896 | 800   |
| Abcb11        | A_51_P309338 | NM_021022    | ATP-binding cassette, sub-family B (MDR/     | -1.151 | 72.2  | 0.80756 | 24555 P | 1.011  | 42.43 | 0.83061 | 11466 |
| Anxa4         | A_51_P256344 | NM_013471    | annexin A4                                   | -1.151 | 65.79 | 0.77015 | 19963 P | 1.14   | 8.32  | 0.13739 | 3793  |
| Dusp12        | A_51_P134776 | NM_023173    | dual specificity phosphatase 12              | -1.151 | 69.29 | 0.7332  | 20390 P | 1.005  | 42.43 | 0.93769 | 12456 |
| Irf2          | A_51_P316523 | NM_008391    | interferon regulatory factor 2               | -1.151 | 69.29 | 0.74447 | 20817 P | 1.164  | 9.71  | 0.22226 | 5243  |
| Luc7l         | A_52_P311417 | NM_025881    | Luc7 homolog (S. cerevisiae)-like            | -1.151 | 65.79 | 0.7114  | 19041 P | 1.136  | 9.71  | 0.15944 | 4209  |



|               |              |              |                                               |        |       |         |         |        |       |         |       |
|---------------|--------------|--------------|-----------------------------------------------|--------|-------|---------|---------|--------|-------|---------|-------|
| Parg          | A_51_P413461 | NM_011960    | poly (ADP-ribose) glycohydrolase              | -1.151 | 57.76 | 0.60729 | 13768 P | -1.336 | 0.51  | 0.00755 | 273   |
| Rg9mtd1       | A_51_P301994 | NM_029092    | RNA (guanine-9-) methyltransferase dom        | -1.151 | 72.2  | 0.82703 | 25846 P | -1.02  | 48.39 | 0.66709 | 10020 |
| 2010317E24Rik | A_51_P472217 | BC070477     | RIKEN cDNA 2010317E24 gene                    | -1.152 | 75.14 | 0.85101 | 27783 P | -1.192 | 1.62  | 0.03941 | 1495  |
| Asb8          | A_51_P142091 | NM_030121    | ankyrin repeat and SOCS box-containing p      | -1.152 | 69.29 | 0.8011  | 18038 M | 1.073  | 22.1  | 0.38475 | 7335  |
| Bcl2l13       | A_51_P255757 | NM_153516    | BCL2-like 13 (apoptosis facilitator)          | -1.152 | 61.79 | 0.6713  | 17100 P | 1.081  | 11.33 | 0.11652 | 3406  |
| Clptm1        | A_51_P332799 | NM_019649    | cleft lip and palate associated transmembr    | -1.152 | 53.87 | 0.58634 | 12837 P | -1.053 | 40.63 | 0.33294 | 6714  |
| Jak2          | A_52_P309376 | NM_008413    | Janus kinase 2                                | -1.152 | 75.14 | 0.88121 | 29727 P | -1.017 | 49.48 | 0.80818 | 11256 |
| Map2k3        | A_51_P272817 | NM_008928    | mitogen activated protein kinase kinase 3     | -1.152 | 53.87 | 0.57768 | 12388 P | 1.076  | 16.2  | 0.24471 | 5568  |
| Sfrs2         | A_51_P262432 | NM_011358    | splicing factor, arginine/serine-rich 2 (SC-  | -1.152 | 69.29 | 0.79483 | 17806 M | -1.137 | 3.82  | 0.05152 | 1896  |
| Tspyl1        | A_52_P658034 | NM_009433    | testis-specific protein, Y-encoded-like 1     | -1.152 | 72.2  | 0.8365  | 26846 P | -1.019 | 49.48 | 0.799   | 11169 |
| Zcchc3        | A_51_P479132 | NM_175126    | zinc finger, CCHC domain containing 3         | -1.152 | 65.79 | 0.73013 | 20264 P | 1.03   | 36.07 | 0.66894 | 10036 |
| 1810007M14Rik | A_51_P317166 | AK007365     | RIKEN cDNA 1810007M14 gene                    | -1.153 | 57.76 | 0.59364 | 13149 P | 1.18   | 9.71  | 0.2404  | 5493  |
| 2600005C20Rik | A_52_P644790 | AK083675     | ribosomal RNA processing 1 homolog B (S       | -1.153 |       | 0.82214 | 16470 A | 1.143  | 9.71  | 0.15508 | 4133  |
| Arf1          | A_52_P242438 | NM_007476    | ADP-ribosylation factor 1                     | -1.153 | 61.79 | 0.73382 | 15618 M | 1.183  | 3.82  | 0.05209 | 1915  |
| BC023892      | A_51_P272876 | XM_135029    | cDNA sequence BC023892                        | -1.153 | 72.2  | 0.82214 | 25529 P | 1.084  | 19.02 | 0.37742 | 7248  |
| Dazap2        | A_51_P321580 | NM_011873    | DAZ associated protein 2                      | -1.153 | 69.29 | 0.82639 | 19184 M | 1.213  | 5.75  | 0.14469 | 3937  |
| Fndc3b        | A_51_P202512 | NM_173182    | fibronectin type III domain containing 3B     | -1.153 | 45.92 | 0.54522 | 11207 P | 1.077  | 30.75 | 0.71557 | 10446 |
| Fzr1          | A_52_P486322 | NM_019757    | fizzy/cell division cycle 20 related 1 (Dros  | -1.153 | 75.14 | 0.88606 | 30031 P | -1.068 | 38.4  | 0.3959  | 7470  |
| Gnaq          | A_51_P311659 | AK031823     |                                               | -1.153 | 61.79 | 0.66333 | 16714 P | 1.139  | 8.32  | 0.12613 | 3632  |
| H47           | A_51_P323610 | NM_024439    | histocompatibility 47                         | -1.153 | 65.79 | 0.72077 | 19613 P | -1.072 | 28.13 | 0.20046 | 4911  |
| Kctd3         | A_52_P243102 | NM_172650    | potassium channel tetramerisation doma        | -1.153 | 69.29 | 0.7414  | 20665 P | 1.067  | 25.31 | 0.45934 | 8093  |
| Mbtps1        | A_51_P382588 | NM_019709    | membrane-bound transcription factor pe        | -1.153 | 69.29 | 0.80583 | 18245 M | 1.095  | 13.58 | 0.22294 | 5257  |
| Psme3         | A_51_P166762 | NM_011192    | proteaseome (prosome, macropain) 28 su        | -1.153 | 57.76 | 0.62667 | 14766 P | -1.087 | 30.75 | 0.31073 | 6463  |
| Slc30a7       | A_52_P113207 | AK039587     | solute carrier family 30 (zinc transporter),  | -1.153 |       | 0.9343  | 13599 A | -1.185 | 1.18  | 0.02003 | 857   |
| Spcs2         | A_51_P273843 | NM_025668    | signal peptidase complex subunit 2 homo       | -1.153 | 57.76 | 0.71545 | 14603 M | 1.112  | 11.33 | 0.15725 | 4168  |
| Adora2a       | A_51_P387348 | BC110692     | adenosine A2a receptor                        | -1.155 | 53.87 | 0.59026 | 12973 P | 1.148  | 3.01  | 0.02253 | 962   |
| Eif4g1        | A_51_P384193 | NM_145941    | eukaryotic translation initiation factor 4, g | -1.155 | 72.2  | 0.80825 | 24605 P | 1.028  | 36.07 | 0.59488 | 9390  |
| Fnbp4         | A_51_P509808 | NM_018828    | formin binding protein 4                      | -1.155 | 61.79 | 0.65947 | 16558 P | 1.159  | 4.63  | 0.0453  | 1703  |
| Kbtbd2        | A_51_P189151 | AK028396     | kelch repeat and BTB (POZ) domain conta       | -1.155 | 61.79 | 0.62996 | 15084 P | 1.096  | 11.33 | 0.17106 | 4400  |
| Mycbp         | A_52_P408657 | NM_019660    | c-myc binding protein                         | -1.155 | 65.79 | 0.7015  | 18477 P | 1.015  | 42.43 | 0.8124  | 11306 |
| Serf2         | A_51_P145357 | NM_011354    | small EDRK-rich factor 2                      | -1.155 | 53.87 | 0.7001  | 13953 M | -1.017 | 49.48 | 0.75469 | 10821 |
| Tbc1d10b      | A_51_P233947 | NM_144522    | TBC1 domain family, member 10b                | -1.155 | 69.29 | 0.78472 | 23050 P | 1.037  | 36.07 | 0.71909 | 10482 |
| Cdc42se1      | A_51_P512591 | NM_172395    | CDC42 small effector 1                        | -1.156 | 49.93 | 0.55997 | 11758 P | 1.034  | 30.75 | 0.47675 | 8279  |
| Mat1a         | A_51_P464182 | NM_133653    | methionine adenosyltransferase I, alpha       | -1.156 | 65.79 | 0.71674 | 19336 P | -1.008 | 49.48 | 0.89905 | 12055 |
| Mxi1          | A_51_P294994 | NM_001008542 | Max interacting protein 1                     | -1.156 | 53.87 | 0.58964 | 12942 P | -1.05  | 38.4  | 0.27417 | 6015  |
| Nit2          | A_52_P448006 | NM_023175    | nitrilase family, member 2                    | -1.156 | 61.79 | 0.67001 | 17034 P | 1.017  | 40.63 | 0.71638 | 10461 |
| Rbm9          | A_52_P310530 | NM_053104    | RNA binding motif protein 9                   | -1.156 | 57.76 | 0.66363 | 15969 P | 1.106  | 13.58 | 0.23272 | 5392  |
| Sec23b        | A_51_P371120 | NM_019787    | SEC23B (S. cerevisiae)                        | -1.156 | 57.76 | 0.61992 | 14455 P | -1.078 | 25.31 | 0.17766 | 4527  |
| Ubqln2        | A_52_P381929 | NM_018798    | ubiquilin 2                                   | -1.156 | 69.29 | 0.74909 | 21033 P | 1.123  | 6.98  | 0.07145 | 2422  |
| Cpn1          | A_52_P308669 | NM_030703    | carboxypeptidase N, polypeptide 1             | -1.157 | 53.87 | 0.56806 | 11984 P | -1.064 | 33.49 | 0.27    | 5957  |
| Mknk2         | A_52_P376135 | NM_021462    | MAP kinase-interacting serine/threonine       | -1.157 | 75.14 | 0.70968 | 16944 P | -1.04  | 45.05 | 0.58166 | 9266  |
| Ppm1g         | A_51_P484832 | NM_008014    | protein phosphatase 1G (formerly 2C), m       | -1.157 | 61.79 | 0.63441 | 15414 P | 1.165  | 5.75  | 0.06576 | 2303  |
| Prpf18        | A_51_P148597 | NM_026045    | PRP18 pre-mRNA processing factor 18 ho        | -1.157 | 53.87 | 0.70294 | 14091 M | 1.553  | 0.24  | 0.0065  | 181   |
| Slc1a5        | A_51_P453475 | NM_009201    | solute carrier family 1 (neutral amino acid   | -1.157 | 61.79 | 0.65034 | 16107 P | 1.008  | 42.43 | 0.88304 | 11895 |
| Smad5         | A_51_P452207 | NM_008541    | MAD homolog 5 (Drosophila)                    | -1.157 | 61.79 | 0.65163 | 16153 P | 1.015  | 42.43 | 0.85461 | 11626 |
| Tenc1         | A_51_P395473 | NM_153533    | tensin like C1 domain-containing phosphat     | -1.157 | 42.28 | 0.52633 | 10567 P | 1.01   | 42.43 | 0.8449  | 11560 |
| Tex261        | A_51_P147654 | AK170049     | testis expressed gene 261                     | -1.157 | 65.79 | 0.72699 | 20051 P | 1.072  | 16.2  | 0.18589 | 4668  |
| Map3k7        | A_52_P175952 | NM_172688    | mitogen activated protein kinase kinase k     | -1.159 | 45.92 | 0.52764 | 10623 P | 1.052  | 22.1  | 0.25407 | 5725  |
| Mcm7          | A_51_P165704 | NM_008568    | minichromosome maintenance deficient          | -1.159 | 57.76 | 0.6013  | 13521 P | -1.264 | 0.51  | 0.00731 | 253   |
| Srp19         | A_51_P514668 | NM_025527    | signal recognition particle 19                | -1.159 | 61.79 | 0.67216 | 17159 P | 1.013  | 42.43 | 0.79039 | 11099 |
| Trp53         | A_52_P491849 | NM_011640    | transformation related protein 53             | -1.159 | 61.79 | 0.64187 | 15781 P | 1.04   | 33.49 | 0.61966 | 9619  |
| Ube2r2        | A_52_P194170 | NM_026275    | ubiquitin-conjugating enzyme E2R 2            | -1.159 | 45.92 | 0.53453 | 10870 P | 1.085  | 13.58 | 0.2134  | 5089  |
| 1110032O16Rik | A_52_P225466 | BC046763     | RIKEN cDNA 1110032O16 gene                    | -1.16  | 65.79 | 0.6926  | 18055 P | 1.003  | 42.43 | 0.98171 | 12866 |

|               |              |              |                                             |        |       |         |         |        |       |         |       |
|---------------|--------------|--------------|---------------------------------------------|--------|-------|---------|---------|--------|-------|---------|-------|
| Bace1         | A_51_P167971 | NM_011792    | beta-site APP cleaving enzyme 1             | -1.16  | 61.79 | 0.64288 | 15845 P | 1.01   | 42.43 | 0.82696 | 11429 |
| Brd4          | A_52_P494230 | NM_020508    | bromodomain containing 4                    | -1.16  | 69.29 | 0.78996 | 17564 M | 1.022  | 38.4  | 0.74779 | 10773 |
| Cd47          | A_51_P221014 | NM_010581    | CD47 antigen (Rh-related antigen, integrin  | -1.16  | 53.87 | 0.57513 | 12255 P | 1.109  | 13.58 | 0.28419 | 6140  |
| Ipo4          | A_51_P347823 | NM_024267    | importin 4                                  | -1.16  | 69.29 | 0.74584 | 20878 P | -1.053 | 45.68 | 0.69459 | 10275 |
| Rbm22         | A_51_P195365 | NM_025776    | RNA binding motif protein 22                | -1.16  | 57.76 | 0.58724 | 12871 P | 1.101  | 8.32  | 0.07277 | 2471  |
| Sipa1         | A_52_P675381 | NM_011379    | signal-induced proliferation associated ge  | -1.16  | 65.79 | 0.72009 | 19555 P | 1.031  | 36.07 | 0.63382 | 9754  |
| 2310003C23Rik | A_51_P133445 | NM_029607    | RIKEN cDNA 2310003C23 gene                  | -1.161 | 45.92 | 0.5299  | 10744 P | 1.041  | 30.75 | 0.48679 | 8405  |
| 4933435A13Rik | A_52_P495439 | NM_028304    | RIKEN cDNA 4933435A13 gene                  | -1.161 | 65.79 | 0.72307 | 19917 P | -1.007 | 49.48 | 0.92036 | 12277 |
| Mapre1        | A_51_P185509 | NM_007896    | microtubule-associated protein, RP/EB fa    | -1.161 | 57.76 | 0.59336 | 13101 P | 1.026  | 36.07 | 0.61001 | 9526  |
| Ncoa6         | A_51_P521128 | NM_019825    | nuclear receptor coactivator 6              | -1.161 | 65.79 | 0.68798 | 17818 P | -1.024 | 48.39 | 0.68864 | 10225 |
| Rab23         | A_52_P623538 | NM_008999    | RAB23, member RAS oncogene family           | -1.161 | 65.79 | 0.69194 | 18025 P | -1.078 | 28.13 | 0.22782 | 5331  |
| Smad3         | A_52_P352277 | NM_016769    | MAD homolog 3 (Drosophila)                  | -1.161 | 65.79 | 0.70407 | 18644 P | 1.075  | 19.02 | 0.29151 | 6225  |
| Stat2         | A_51_P225808 | NM_019963    | signal transducer and activator of transcr  | -1.161 | 61.79 | 0.64373 | 15879 P | 1.032  | 36.07 | 0.65948 | 9965  |
| Tbn           | A_51_P203710 | NM_022015    | taube nuss                                  | -1.161 | 61.79 | 0.66969 | 17017 P | -1.166 | 2.53  | 0.04039 | 1540  |
| Tloc1         | A_52_P537459 | NM_027016    | translocation protein 1                     | -1.161 | 65.79 | 0.68725 | 17783 P | 1.038  | 30.75 | 0.53437 | 8882  |
| 0910001A06Rik | A_52_P63709  | NM_144846    | RIKEN cDNA 0910001A06 gene                  | -1.163 | 61.79 | 0.67248 | 17192 P | 1.022  | 38.4  | 0.68308 | 10171 |
| Dusp22        | A_51_P231793 | NM_134068    | dual specificity phosphatase 22             | -1.163 | 69.29 | 0.79007 | 23463 P | -1.027 | 49    | 0.787   | 11064 |
| Gcs1          | A_52_P536481 | NM_020619    | glucosidase 1                               | -1.163 | 49.93 | 0.54741 | 11308 P | 1.059  | 22.1  | 0.29147 | 6224  |
| Rab21         | A_52_P78966  | NM_024454    | RAB21, member RAS oncogene family           | -1.163 | 49.93 | 0.53653 | 10927 P | 1.145  | 9.71  | 0.15915 | 4198  |
| Spop          | A_51_P330717 | NM_025287    | speckle-type POZ protein                    | -1.163 | 49.93 | 0.55231 | 11501 P | 1.126  | 8.32  | 0.07774 | 2594  |
| Tpcn2         | A_51_P517952 | NM_146206    | two pore segment channel 2                  | -1.163 | 61.79 | 0.63457 | 15448 P | -1.031 | 46.85 | 0.64521 | 9847  |
| Apba3         | A_51_P285960 | NM_018758    | amyloid beta (A4) precursor protein-bind    | -1.164 | 65.79 | 0.68943 | 17898 P | 1.104  | 19.02 | 0.4846  | 8381  |
| BC030476      | A_51_P330825 | NM_173421    | cDNA sequence BC030476                      | -1.164 | 72.2  | 0.83678 | 26867 P | 1.126  | 5.75  | 0.05015 | 1853  |
| D330050I23Rik | A_52_P6092   | NM_207269    | RIKEN cDNA D330050I23 gene                  | -1.164 | 65.79 | 0.78046 | 17240 M | 1.319  | 1.58  | 0.02469 | 1021  |
| Gcdh          | A_51_P260098 | U18992       | glutaryl-Coenzyme A dehydrogenase           | -1.164 | 53.87 | 0.66333 | 15945 P | -1.02  | 49.48 | 0.78373 | 11039 |
| Map3k7ip1     | A_51_P121466 | NM_025609    | mitogen-activated protein kinase kinase k   | -1.164 | 72.2  | 0.79913 | 24047 P | -1.207 | 0.75  | 0.01141 | 447   |
| BC005471      | A_51_P328883 | NM_145612    | zinc finger protein 810                     | -1.166 | 57.76 | 0.58633 | 12836 P | -1.211 | 1.32  | 0.034   | 1313  |
| Cbl1          | A_52_P368244 | AK051737     | Casitas B-lineage lymphoma-like 1           | -1.166 | 61.79 | 0.67372 | 17247 P | 1.126  | 5.75  | 0.0403  | 1539  |
| D4Wsu53e      | A_51_P346715 | NM_023665    | DNA segment, Chr 4, Wayne State Univer      | -1.166 | 69.29 | 0.79032 | 17581 M | 1.027  | 42.43 | 0.92842 | 12374 |
| Ebi3          | A_51_P202633 | NM_015766    | Epstein-Barr virus induced gene 3           | -1.166 | 69.29 | 0.7874  | 23218 P | 1.112  | 8.32  | 0.07263 | 2455  |
| Foxj2         | A_52_P503181 | NM_021899    | forkhead box J2                             | -1.166 | 65.79 | 0.77458 | 17023 M | 1.005  | 42.43 | 0.92273 | 12315 |
| Hnrpl         | A_51_P181571 | NM_177301    | heterogeneous nuclear ribonucleoprotein     | -1.166 | 69.29 | 0.81427 | 18630 M | 1.053  | 22.1  | 0.27583 | 6038  |
| Lck           | A_51_P141288 | NM_010693    | lymphocyte protein tyrosine kinase          | -1.166 | 53.87 | 0.58125 | 12551 P | 1.065  | 19.02 | 0.22    | 5212  |
| Npepps        | A_51_P133078 | NM_008942    | aminopeptidase puromycin sensitive          | -1.166 | 53.87 | 0.55906 | 11702 P | 1.014  | 42.43 | 0.91857 | 12256 |
| Pla2g12a      | A_51_P207550 | NM_023196    | phospholipase A2, group X1IA                | -1.166 | 69.29 | 0.75422 | 21327 P | -1.142 | 4.63  | 0.06417 | 2260  |
| Scamp2        | A_51_P115547 | NM_022813    | secretory carrier membrane protein 2        | -1.166 | 49.93 | 0.68148 | 13256 M | 1.134  | 11.33 | 0.21414 | 5097  |
| Srp68         | A_52_P561584 | NM_146032    | signal recognition particle 68              | -1.166 | 65.79 | 0.72059 | 19580 P | 1.028  | 36.07 | 0.6385  | 9791  |
| Tapbp         | A_51_P304500 | NM_001025313 | TAP binding protein                         | -1.166 | 65.79 | 0.78035 | 17230 M | -1.018 | 49.22 | 0.71557 | 10447 |
| Usp9x         | A_52_P622391 | NM_009481    | ubiquitin specific peptidase 9, X chromos   | -1.166 | 57.76 | 0.59094 | 13007 P | 1.023  | 38.4  | 0.68824 | 10222 |
| Zfp286        | A_52_P664405 | NM_138949    | zinc finger protein 286                     | -1.166 | 75.14 | 0.8698  | 28867 P | -1.342 | 0.51  | 0.00627 | 160   |
| Zfyve19       | A_51_P372936 | NM_028054    | zinc finger, FYVE domain containing 19      | -1.166 | 57.76 | 0.60101 | 13505 P | 1.131  | 13.58 | 0.32695 | 6641  |
| Cnn2          | A_51_P427663 | NM_007725    | calponin 2                                  | -1.167 | 72.2  | 0.83927 | 27078 P | 1.267  | 1.58  | 0.01607 | 694   |
| D2Ertd391e    | A_51_P448881 | NM_145528    | DNA segment, Chr 2, ERATO Doi 391, exp      | -1.167 | 49.93 | 0.54163 | 11064 P | 1.038  | 30.75 | 0.45757 | 8075  |
| Gjb1          | A_51_P462422 | NM_008124    | gap junction membrane channel protein 1     | -1.167 | 72.2  | 0.81499 | 25076 M | -1.253 | 3.01  | 0.11789 | 3430  |
| Napa          | A_51_P246816 | NM_025898    | N-ethylmaleimide sensitive fusion protei    | -1.167 | 65.79 | 0.7075  | 18804 P | -1.124 | 3.01  | 0.03702 | 1409  |
| Serf1         | A_52_P85495  | BC001981     | predicted gene, ENSMUSG0000050599           | -1.167 | 49.93 | 0.53474 | 10880 P | -1.159 | 1.32  | 0.01962 | 837   |
| Socs5         | A_52_P281033 | NM_019654    | suppressor of cytokine signaling 5          | -1.167 | 65.79 | 0.70666 | 18761 P | 1.013  | 40.63 | 0.76376 | 10883 |
| Xbp1          | A_52_P185079 | NM_013842    | X-box binding protein 1                     | -1.167 | 65.79 | 0.73227 | 20356 P | 1.052  | 25.31 | 0.4138  | 7663  |
| Anapc4        | A_51_P434198 | NM_024213    | anaphase promoting complex subunit 4        | -1.168 | 61.79 | 0.62794 | 14858 P | 1.052  | 22.1  | 0.32441 | 6606  |
| Arid3a        | A_51_P485828 | NM_007880    | AT rich interactive domain 3A (Bright like) | -1.168 | 61.79 | 0.6718  | 17125 P | 1.003  | 42.43 | 0.97937 | 12833 |
| Dhx8          | A_52_P657859 | AK049586     | DEAH (Asp-Glu-Ala-His) box polypeptide 8    | -1.168 | 65.79 | 0.68139 | 17493 P | -1.01  | 49.48 | 0.83846 | 11512 |
| Htatip        | A_52_P584109 | NM_178637    | HIV-1 tat interactive protein, homolog (hu  | -1.168 | 49.93 | 0.52969 | 10734 P | 1.05   | 22.1  | 0.28928 | 6203  |
| Klhd3         | A_51_P148122 | NM_027910    | kelch domain containing 3                   | -1.168 | 61.79 | 0.66728 | 16916 P | 1.113  | 6.98  | 0.05346 | 1966  |

|               |              |              |                                              |        |       |         |         |        |       |         |       |
|---------------|--------------|--------------|----------------------------------------------|--------|-------|---------|---------|--------|-------|---------|-------|
| Sertad1       | A_52_P217211 | NM_018820    | SERTA domain containing 1                    | -1.168 | 69.29 | 0.75654 | 21466 P | -1.127 | 16.2  | 0.24328 | 5558  |
| Tsen54        | A_51_P434953 | NM_029557    | tRNA splicing endonuclease 54 homolog        | -1.168 | 65.79 | 0.71197 | 19062 P | -1.161 | 3.82  | 0.0744  | 2516  |
| 4931406P16Rik | A_51_P326187 | NM_172741    | RIKEN cDNA 4931406P16 gene                   | -1.117 | 57.76 | 0.58498 | 12776 P | 1.113  | 6.98  | 0.0571  | 2061  |
| 6720469N11Rik | A_52_P131812 | AK032898     | RIKEN cDNA 6720469N11 gene                   | -1.117 | 75.14 | 0.89294 | 30488 P | -1.092 | 16.2  | 0.11933 | 3477  |
| Adnp          | A_52_P55717  | NM_009628    | activity-dependent neuroprotective prote     | -1.117 | 61.79 | 0.62641 | 14750 P | 1.07   | 22.1  | 0.35673 | 6976  |
| C1qtnf4       | A_52_P633489 | NM_026161    | C1q and tumor necrosis factor related pro    | -1.117 | 69.29 | 0.79529 | 23844 P | 1.05   | 22.1  | 0.2529  | 5694  |
| Camk2b        | A_51_P318933 | NM_007595    | calcium/calmodulin-dependent protein ki      | -1.117 | 65.79 | 0.77954 | 17200 M | 1.063  | 19.02 | 0.22975 | 5345  |
| Map4k1        | A_52_P552589 | NM_008279    | mitogen activated protein kinase kinase k    | -1.117 | 77.44 | 0.9089  | 31765 M | 1.02   | 38.4  | 0.70084 | 10327 |
| Prkx          | A_51_P179864 | NM_016979    | protein kinase, X-linked                     | -1.117 | 57.76 | 0.60291 | 13590 P | 1.061  | 25.31 | 0.4228  | 7756  |
| Raly          | A_51_P337246 | NM_023130    | hnRNP-associated with lethal yellow          | -1.117 | 57.76 | 0.60208 | 13532 P | 1.122  | 5.75  | 0.04247 | 1596  |
| Rnpep         | A_51_P493558 | NM_145417    | arginyl aminopeptidase (aminopeptidase       | -1.117 | 61.79 | 0.63638 | 15553 P | 1.069  | 19.02 | 0.2829  | 6118  |
| Slc38a2       | A_52_P676686 | NM_175121    | solute carrier family 38, member 2           | -1.117 | 57.76 | 0.58964 | 12938 P | 1.103  | 11.33 | 0.18616 | 4672  |
| Tsfm          | A_51_P235705 | NM_025537    | Ts translation elongation factor, mitochon   | -1.117 | 65.79 | 0.72255 | 19834 P | -1.088 | 25.31 | 0.20825 | 5027  |
| Zbp1          | A_51_P184936 | NM_021394    | Z-DNA binding protein 1                      | -1.117 | 45.92 | 0.52072 | 10372 P | 1.022  | 40.63 | 0.79541 | 11139 |
| 5730494M16Rik | A_52_P356841 | NM_001004361 | RIKEN cDNA 5730494M16 gene                   | -1.171 | 65.79 | 0.69847 | 18303 P | 1.01   | 42.43 | 0.92211 | 12284 |
| AU020206      | A_51_P368171 | AK049415     | expressed sequence AU020206                  | -1.171 | 75.14 | 0.88491 | 29974 P | 1.053  | 22.1  | 0.30737 | 6406  |
| BC037393      | A_52_P444785 | NM_201369    | cDNA sequence BC037393                       | -1.171 | 72.2  | 0.82265 | 25582 P | 1.081  | 13.58 | 0.17748 | 4522  |
| Csda          | A_51_P311977 | NM_011733    | cold shock domain protein A                  | -1.171 | 61.79 | 0.63638 | 15550 P | 1.126  | 5.75  | 0.04155 | 1570  |
| Dhx15         | A_51_P247960 | AF017153     | DEAH (Asp-Glu-Ala-His) box polypeptide       | -1.171 | 53.87 | 0.56811 | 11999 P | -1.155 | 1.62  | 0.02519 | 1038  |
| Eif4g3        | A_51_P438363 | NM_172703    | eukaryotic translation initiation factor 4 g | -1.171 | 61.79 | 0.65572 | 16365 P | 1.21   | 6.98  | 0.16182 | 4252  |
| Nt5m          | A_51_P344046 | NM_134029    | 5',3'-nucleotidase, mitochondrial            | -1.171 | 65.79 | 0.71977 | 19510 P | 1.038  | 28.13 | 0.39381 | 7448  |
| Prpf3         | A_52_P672453 | NM_027541    | PRP3 pre-mRNA processing factor 3 homo       | -1.171 | 42.28 | 0.49535 | 9446 P  | 1.231  | 2.53  | 0.0227  | 966   |
| Rutbc2        | A_52_P170985 | NM_172718    | RUN and TBC1 domain containing 2             | -1.171 | 65.79 | 0.75046 | 16080 M | -1.039 | 44.4  | 0.48303 | 8361  |
| Stat5a        | A_51_P152765 | NM_011488    | signal transducer and activator of transcri  | -1.171 | 57.76 | 0.59355 | 13111 P | 1.031  | 33.49 | 0.61332 | 9551  |
| Tbc1d20       | A_52_P419437 | AK082369     | TBC1 domain family, member 20                | -1.171 | 53.87 | 0.5664  | 11918 P | 1.227  | 3.46  | 0.04772 | 1785  |
| Hnrpab        | A_52_P20966  | NM_010448    | heterogeneous nuclear ribonucleoprotein      | -1.172 | 53.87 | 0.55252 | 11520 P | 1.106  | 9.71  | 0.08966 | 2888  |
| Hpcal1        | A_52_P536735 | NM_016677    | hippocalcin-like 1                           | -1.172 | 57.76 | 0.61836 | 14319 P | -1.117 | 19.02 | 0.24315 | 5554  |
| Ptov1         | A_51_P369628 | NM_133949    | prostate tumor over expressed gene 1         | -1.172 | 53.87 | 0.57688 | 12360 P | -1.154 | 4.63  | 0.08202 | 2704  |
| Rab3d         | A_52_P432919 | NM_031874    | RAB3D, member RAS oncogene family            | -1.172 | 65.79 | 0.72951 | 20199 P | -1.025 | 46.3  | 0.55063 | 9033  |
| Spcs3         | A_52_P214861 | AK048051     | signal peptidase complex subunit 3 homo      | -1.172 | 45.92 | 0.5136  | 10078 P | -1.098 | 22.1  | 0.19654 | 4843  |
| Cant1         | A_52_P85892  | NM_029502    | calcium activated nucleotidase 1             | -1.174 | 49.93 | 0.54172 | 10632 M | -1.119 | 6.98  | 0.0697  | 2392  |
| Cth           | A_51_P431737 | NM_145953    | cystathionase (cystathionine gamma-lyasi     | -1.174 | 72.2  | 0.83732 | 26889 P | -1.02  | 48.39 | 0.6447  | 9844  |
| Igfbp1        | A_51_P447545 | NM_008341    | insulin-like growth factor binding protein   | -1.174 | 69.29 | 0.60476 | 11876 M | 1.124  | 11.33 | 0.20298 | 4942  |
| Lars          | A_52_P500488 | BC052715     | leucyl-tRNA synthetase                       | -1.174 | 53.87 | 0.56839 | 12012 P | -1.04  | 43.75 | 0.45489 | 8044  |
| Msh6          | A_51_P405565 | NM_010830    | mutS homolog 6 (E. coli)                     | -1.174 | 53.87 | 0.54946 | 11406 P | 1.091  | 19.02 | 0.41258 | 7643  |
| Nck1          | A_51_P182662 | NM_010878    | non-catalytic region of tyrosine kinase ad   | -1.174 | 61.79 | 0.6529  | 16244 P | 1.163  | 6.98  | 0.12424 | 3585  |
| Polr2a        | A_51_P211810 | NM_009089    | polymerase (RNA) II (DNA directed) polyp     | -1.174 | 53.87 | 0.57108 | 12095 P | -1.073 | 28.13 | 0.21612 | 5130  |
| Ppp2ca        | A_51_P516896 | NM_019411    | protein phosphatase 2 (formerly 2A), cata    | -1.174 | 38.68 | 0.48167 | 8994 P  | 1.028  | 33.49 | 0.54114 | 8955  |
| Ssh1          | A_52_P597323 | AK173144     | slingshot homolog 1 (Drosophila)             | -1.174 | 65.79 | 0.74794 | 17331 M | -1.381 | 0.51  | 0.00584 | 59    |
| Arih2         | A_52_P669843 | NM_011790    | ariadne homolog 2 (Drosophila)               | -1.175 | 38.68 | 0.47761 | 8883 P  | 1.079  | 16.2  | 0.19844 | 4872  |
| BC018507      | A_51_P232439 | BC026613     | cDNA sequence BC018507                       | -1.175 | 42.28 | 0.48921 | 9213 P  | 1.123  | 8.32  | 0.1018  | 3142  |
| Bnip2         | A_52_P364922 | NM_001008238 | BCL2/adenovirus E1B interacting protein      | -1.175 | 65.79 | 0.72009 | 19547 P | 1.05   | 25.31 | 0.35342 | 6931  |
| Cited1        | A_51_P255365 | NM_007709    | Cbp/p300-interacting transactivator with     | -1.175 | 65.79 | 0.69103 | 17963 P | -1.027 | 47.43 | 0.64736 | 9863  |
| Phtf1         | A_52_P644226 | NM_013629    | putative homeodomain transcription fact      | -1.175 | 49.93 | 0.54582 | 11234 P | 1.076  | 16.2  | 0.22891 | 5340  |
| Slc35a3       | A_52_P514317 | NM_144902    | solute carrier family 35 (UDP-N-acetylgluc   | -1.175 | 57.76 | 0.58543 | 12809 P | 1.012  | 42.43 | 0.95226 | 12343 |
| 9530058B02Rik | A_51_P106527 | NM_026633    | RIKEN cDNA 9530058B02 gene                   | -1.176 | 57.76 | 0.59713 | 13338 P | 1.078  | 11.33 | 0.12528 | 3609  |
| Apoa1         | A_51_P408082 | NM_009692    | apolipoprotein A-I                           | -1.176 | 79.26 | 0.94912 | 35337 P | -1.058 | 43.15 | 0.53196 | 8865  |
| BC067068      | A_52_P7195   | NM_207522    | cDNA sequence BC067068                       | -1.176 | 31.88 | 0.47135 | 8618 P  | -1.087 | 28.13 | 0.25778 | 5784  |
| Elf1          | A_52_P296382 | BC053914     | E74-like factor 1                            | -1.176 | 61.79 | 0.63583 | 15520 P | -1.036 | 45.68 | 0.59325 | 9368  |
| Ephx2         | A_51_P116940 | NM_007940    | epoxide hydrolase 2, cytoplasmic             | -1.176 | 75.14 | 0.8861  | 30032 P | -1.016 | 49.48 | 0.75053 | 10794 |
| Gnaz          | A_52_P307761 | NM_010311    | guanine nucleotide binding protein, alpha    | -1.176 | 61.79 | 0.63718 | 15579 P | 1.1    | 8.32  | 0.07487 | 2529  |
| Inpp1         | A_51_P142334 | NM_010567    | inositol polyphosphate phosphatase-like      | -1.176 | 65.79 | 0.68972 | 17908 P | 1.036  | 28.13 | 0.40356 | 7550  |
| Med9          | A_51_P496400 | NM_138675    | mediator of RNA polymerase II transcripti    | -1.176 | 65.79 | 0.69914 | 18344 P | -1.358 | 0.51  | 0.00643 | 177   |

|               |              |              |                                             |        |       |         |         |        |       |         |       |
|---------------|--------------|--------------|---------------------------------------------|--------|-------|---------|---------|--------|-------|---------|-------|
| Pole2         | A_51_P269687 | NM_011133    | polymerase (DNA directed), epsilon 2 (p5    | -1.176 | 75.14 | 0.87046 | 28926 P | -1.054 | 36.07 | 0.26935 | 5944  |
| Rcl1          | A_52_P241484 | NM_021525    | RNA terminal phosphate cyclase-like 1       | -1.176 | 53.87 | 0.57961 | 12471 P | 1.063  | 19.02 | 0.29461 | 6273  |
| Rnf126        | A_51_P266847 | NM_144528    | ring finger protein 126                     | -1.176 | 65.79 | 0.74163 | 20678 P | -1.02  | 48.7  | 0.68365 | 10178 |
| Tor2a         | A_52_P88773  | NM_152800    | torsin family 2, member A                   | -1.176 | 57.76 | 0.61882 | 14389 P | 1.012  | 33.49 | 0.88024 | 10545 |
| 1600027N09Rik | A_51_P422691 | BC085320     | RIKEN cDNA 1600027N09 gene                  | -1.178 | 42.28 | 0.48921 | 9215 P  | 1.01   | 42.43 | 0.88429 | 11908 |
| Cdc20         | A_51_P361022 | NM_023223    | cell division cycle 20 homolog (S. cerevisi | -1.178 | 72.2  | 0.84246 | 27239 P | -1.421 | 0     | 0.00584 | 29    |
| Cdc42ep3      | A_51_P267494 | NM_026514    | CDC42 effector protein (Rho GTPase bind     | -1.178 | 57.76 | 0.61824 | 14304 P | -1.085 | 25.31 | 0.21473 | 5110  |
| Ddb1          | A_51_P459538 | NM_015735    | damage specific DNA binding protein 1       | -1.178 | 49.93 | 0.54352 | 11146 P | 1.133  | 5.75  | 0.04955 | 1831  |
| Drap1         | A_51_P479933 | NM_024176    | Dr1 associated protein 1 (negative cofact   | -1.178 | 69.29 | 0.76858 | 22145 P | 1.038  | 30.75 | 0.46339 | 8144  |
| Ranbp2        | A_51_P511375 | NM_011240    | RAN binding protein 2                       | -1.178 | 45.92 | 0.51541 | 10136 P | 1.027  | 33.49 | 0.56295 | 9134  |
| Rbm7          | A_52_P145017 | NM_144948    | RNA binding motif protein 7                 | -1.178 | 69.29 | 0.78046 | 22790 P | -1.078 | 38.4  | 0.43247 | 7864  |
| Smad4         | A_52_P611867 | NM_008540    | MAD homolog 4 (Drosophila)                  | -1.178 | 65.79 | 0.74659 | 15957 M | 1.205  | 3.01  | 0.02732 | 1107  |
| Zdhhc14       | A_51_P174081 | NM_146073    | zinc finger, DHHC domain containing 14      | -1.178 | 69.29 | 0.76814 | 22113 P | 1.061  | 22.1  | 0.33394 | 6726  |
| Btbd9         | A_51_P491437 | NM_172618    | BTB (POZ) domain containing 9               | -1.179 | 61.79 | 0.64101 | 15725 P | -1.045 | 43.75 | 0.43432 | 7890  |
| Mcfcd2        | A_51_P465232 | NM_139295    | multiple coagulation factor deficiency 2    | -1.179 | 65.79 | 0.73228 | 20359 P | 1.027  | 36.07 | 0.63397 | 9755  |
| Nsun5         | A_52_P493183 | AK156651     | NOL1/NOP2/Sun domain family, member         | -1.179 | 61.79 | 0.64534 | 15920 P | -1.202 | 1.18  | 0.0183  | 778   |
| Phf10         | A_51_P311125 | NM_024250    | PHD finger protein 10                       | -1.179 | 65.79 | 0.71601 | 19277 P | 1.065  | 22.1  | 0.3844  | 7332  |
| Shh           | A_52_P49014  | NM_009170    | sonic hedgehog                              | -1.179 | 61.79 | 0.67248 | 17176 P | 1.055  | 22.1  | 0.35146 | 6900  |
| Syncrip       | A_52_P567031 | NM_019796    | synaptotagmin binding, cytoplasmic RNA      | -1.179 | 45.92 | 0.50463 | 9852 P  | -1.054 | 43.15 | 0.4569  | 8067  |
| Zfp358        | A_51_P350996 | NM_080461    | zinc finger protein 358                     | -1.179 | 57.76 | 0.59402 | 13175 P | 1.066  | 19.02 | 0.24279 | 5537  |
| Agpat5        | A_51_P361286 | NM_026792    | 1-acylglycerol-3-phosphate O-acyltransfe    | -1.181 | 75.14 | 0.82598 | 24281 P | 1.058  | 22.1  | 0.34344 | 6802  |
| Ggps1         | A_51_P179604 | NM_010282    | geranylgeranyl diphosphate synthase 1       | -1.181 | 38.68 | 0.47332 | 8718 P  | -1.013 | 49.48 | 0.94151 | 12496 |
| Golph4        | A_52_P279920 | AK149286     | golgi phosphoprotein 4                      | -1.181 | 57.76 | 0.60851 | 13853 P | 1.037  | 28.13 | 0.42111 | 7740  |
| Hic2          | A_52_P234354 | NM_178922    | hypermethylated in cancer 2                 | -1.181 | 61.79 | 0.64982 | 16093 P | -1.255 | 0.56  | 0.01072 | 415   |
| Hnf4g         | A_52_P739999 | AK136534     | hepatocyte nuclear factor 4, gamma          | -1.181 | 72.2  | 0.8117  | 24811 P | -1.008 | 49.48 | 0.9227  | 12298 |
| Kif5b         | A_52_P273177 | NM_008448    | kinesin family member 5B                    | -1.181 | 53.87 | 0.54622 | 11256 P | 1.084  | 16.2  | 0.23607 | 5438  |
| Pak2          | A_51_P172323 | NM_177326    | p21 (CDKN1A)-activated kinase 2             | -1.181 | 42.28 | 0.4809  | 8973 P  | 1.028  | 30.75 | 0.49171 | 8463  |
| Plekha6       | A_52_P430179 | NM_182930    | pleckstrin homology domain containing, f    | -1.181 | 65.79 | 0.6922  | 18042 P | -1.253 | 0.51  | 0.01023 | 387   |
| Rnf26         | A_51_P201609 | NM_153762    | ring finger protein 26                      | -1.181 | 65.79 | 0.70795 | 18836 P | -1.305 | 0.51  | 0.00652 | 184   |
| Scrib         | A_52_P683315 | NM_134089    | scribbled homolog (Drosophila)              | -1.181 | 69.29 | 0.7629  | 21823 P | -1.166 | 1.18  | 0.01922 | 804   |
| Mrpl33        | A_52_P336091 | BC027018     | mitochondrial ribosomal protein L33         | -1.182 | 65.79 | 0.71367 | 19143 P | 1.046  | 28.13 | 0.43952 | 7916  |
| Nipsnap1      | A_51_P214516 | NM_008698    | 4-nitrophenylphosphatase domain and no      | -1.182 | 61.79 | 0.6718  | 17126 P | 1.014  | 42.43 | 0.80705 | 11248 |
| Pigo          | A_52_P462081 | NM_020035    | phosphatidylinositol glycan anchor biosyr   | -1.182 | 57.76 | 0.61815 | 14282 P | 1.124  | 6.98  | 0.06101 | 2171  |
| Prickle1      | A_51_P385370 | NM_001033217 | prickle like 1 (Drosophila)                 | -1.182 | 49.93 | 0.52286 | 10446 P | -1.071 | 28.13 | 0.20535 | 4977  |
| Surf5         | A_51_P141554 | NM_011513    | surfeit gene 5                              | -1.182 | 49.93 | 0.5415  | 11063 P | 1.02   | 38.4  | 0.72022 | 10499 |
| 4930506L13Rik | A_51_P168392 | NM_030188    | tetratricopeptide repeat domain 30A1        | -1.183 | 49.93 | 0.52271 | 10441 P | -1.022 | 49    | 0.72485 | 10522 |
| Myo6          | A_52_P565427 | NM_001039546 | myosin VI                                   | -1.183 | 69.29 | 0.79338 | 17742 M | -1.157 | 9.71  | 0.20501 | 4969  |
| Nfix          | A_52_P148428 | AK080940     | nuclear factor I/X                          | -1.183 | 57.76 | 0.62064 | 14488 P | 1.041  | 28.13 | 0.45234 | 8020  |
| Rapgef2       | A_51_P289912 | XM_203999    | Rap guanine nucleotide exchange factor (    | -1.183 | 57.76 | 0.59081 | 13004 P | 1.003  | 42.43 | 0.94341 | 12517 |
| Crot          | A_51_P489153 | NM_023733    | carnitine O-octanoyltransferase             | -1.185 | 69.29 | 0.74904 | 21020 P | -1.037 | 44.4  | 0.48193 | 8333  |
| Dhrs3         | A_52_P387237 | NM_011303    | dehydrogenase/reductase (SDR family) m      | -1.185 | 72.2  | 0.81031 | 24719 P | 1.051  | 25.31 | 0.41166 | 7627  |
| Eya2          | A_51_P334209 | NM_010165    | eyes absent 2 homolog (Drosophila)          | -1.185 | 65.79 | 0.70847 | 18861 M | -1.008 | 49.48 | 0.90225 | 12116 |
| LOC232875     | A_52_P199747 | BC094341     | predicted gene, EG232875                    | -1.185 | 75.14 | 0.8845  | 29961 P | -1.033 | 47.43 | 0.69502 | 10279 |
| Pou5f1        | A_51_P202340 | NM_013633    | POU domain, class 5, transcription factor   | -1.185 | 75.14 | 0.88903 | 30197 P | 1.001  | 42.43 | 0.98495 | 12928 |
| Psmb10        | A_52_P570266 | NM_013640    | proteasome (prosome, macropain) subun       | -1.185 | 72.2  | 0.80802 | 24601 P | -1.188 | 1.58  | 0.02982 | 1188  |
| Ubn1          | A_52_P288444 | NM_026666    | ubiquitin 1                                 | -1.185 | 69.29 | 0.7993  | 24065 P | 1.087  | 11.33 | 0.1319  | 3706  |
| 1810073G14Rik | A_52_P104700 | NM_026342    | RIKEN cDNA 1810073G14 gene                  | -1.186 | 45.92 | 0.49715 | 9517 P  | -1.07  | 33.49 | 0.30284 | 6351  |
| 1810074P20Rik | A_52_P153333 | NM_026194    | RIKEN cDNA 1810074P20 gene                  | -1.186 | 61.79 | 0.66999 | 17025 P | -1.009 | 49.48 | 0.87183 | 11783 |
| Ash1          | A_52_P621271 | NM_138679    | ash1 (absent, small, or homeotic)-like (Dr  | -1.186 | 53.87 | 0.54172 | 11072 P | 1.02   | 38.4  | 0.66451 | 10001 |
| Atf7          | A_52_P294567 | NM_146065    | activating transcription factor 7           | -1.186 | 65.79 | 0.69196 | 17175 M | 1.015  | 42.43 | 0.83846 | 11511 |
| Hoxb5         | A_51_P436342 | NM_008268    | homeo box B5                                | -1.186 | 57.76 | 0.60476 | 13671 P | 1.118  | 4.63  | 0.04002 | 1531  |
| Jun           | A_51_P325914 | NM_010591    | Jun oncogene                                | -1.186 | 61.79 | 0.71674 | 14669 M | 1.01   | 42.43 | 0.85759 | 11652 |
| Nat6          | A_51_P268145 | NM_019750    | N-acetyltransferase 6                       | -1.186 | 69.29 | 0.77678 | 22557 P | 1.003  | 42.43 | 0.93907 | 12471 |

|                |               |                    |                                                                  |        |       |         |         |        |       |         |       |
|----------------|---------------|--------------------|------------------------------------------------------------------|--------|-------|---------|---------|--------|-------|---------|-------|
| Npm3           | A_51_P499201  | NM_008723          | nucleoplasmin 3                                                  | -1.186 | 49.93 | 0.53749 | 10958 P | -1.174 | 3.01  | 0.06482 | 2274  |
| Shb            | A_52_P696044  | AK145414           | src homology 2 domain-containing transmembrane protein           | -1.186 | 49.93 | 0.52633 | 10575 P | -1.003 | 49.48 | 0.97164 | 12762 |
| Supt5h         | A_52_P15229   | NM_013676          | suppressor of Ty 5 homolog (S. cerevisiae)                       | -1.186 | 53.87 | 0.55118 | 11472 P | -1.045 | 43.75 | 0.49465 | 8498  |
| A230106M15Rik  | A_51_P466828  | ENSMUST00000073524 | RIKEN cDNA A230106M15 gene                                       | -1.188 | 61.79 | 0.6267  | 14772 P | 1.129  | 6.98  | 0.05995 | 2155  |
| AI428936       | A_52_P147803  | NM_153577          | expressed sequence AI428936                                      | -1.188 | 61.79 | 0.66247 | 16686 P | -1.094 | 33.49 | 0.39927 | 7508  |
| BC043118       | A_51_P160439  | NM_174848          | cDNA sequence BC043118                                           | -1.188 | 69.29 | 0.75858 | 17770 M | 1.106  | 11.33 | 0.19196 | 4772  |
| Cbara1         | A_52_P400542  | AK083520           | calcium binding atopy-related autoantigen                        | -1.188 |       | 0.77488 | 16726 A | 1.106  | 9.71  | 0.08344 | 2737  |
| Cntnap4        | A_52_P1107623 | AK034258           | contactin associated protein-like 4                              | -1.188 | 81.02 | 0.71449 | 13517 M | -1.006 | 49.48 | 0.92004 | 12275 |
| D230014K01Rik  | A_52_P28775   | NM_172573          | RIKEN cDNA D230014K01 gene                                       | -1.188 | 69.29 | 0.78097 | 22810 P | 1.016  | 40.63 | 0.72888 | 10564 |
| Gorasp2        | A_51_P173197  | NM_027352          | golgi reassembly stacking protein 2                              | -1.188 | 53.87 | 0.54835 | 11354 P | 1.137  | 16.2  | 0.42447 | 7775  |
| Hcls1          | A_51_P297679  | NM_008225          | hematopoietic cell specific Lyn substrate                        | -1.188 | 69.29 | 0.78484 | 23064 P | -1.094 | 13.58 | 0.11655 | 3408  |
| Hdh            | A_51_P205943  | NM_010414          | Huntington disease gene homolog                                  | -1.188 | 53.87 | 0.5752  | 12258 P | -1.117 | 6.98  | 0.0659  | 2315  |
| Osbp           | A_51_P393768  | XM_148904          | oxysterol binding protein                                        | -1.188 | 61.79 | 0.70773 | 14254 M | -1.045 | 42.43 | 0.35274 | 6916  |
| Thrap3         | A_52_P115996  | BC026580           | thyroid hormone receptor associated protein                      | -1.188 | 61.79 | 0.65843 | 16506 P | -1.166 | 3.82  | 0.07384 | 2505  |
| Zfp46          | A_52_P621817  | NM_009557          | zinc finger protein 46                                           | -1.188 | 53.87 | 0.56738 | 11968 P | 1.037  | 30.75 | 0.53117 | 8841  |
| D19Ert737e     | A_52_P60519   | NM_029648          | DNA segment, Chr 19, ERATO Doi 737, expressed                    | -1.189 | 61.79 | 0.6618  | 16666 P | -1.123 | 5.75  | 0.06486 | 2278  |
| Exosc7         | A_52_P296048  | AK085426           | exosome component 7                                              | -1.189 |       | 0.8038  | 15806 A | 1.02   | 38.4  | 0.68914 | 10229 |
| Golga5         | A_52_P670037  | NM_013747          | golgi autoantigen, golgin subfamily a, 5                         | -1.189 | 42.28 | 0.47267 | 8707 P  | 1.18   | 3.82  | 0.04831 | 1804  |
| Ppp2r2a        | A_51_P301736  | NM_028032          | protein phosphatase 2 (formerly 2A), regulatory subunit 2        | -1.189 | 45.92 | 0.50308 | 9800 P  | -1.01  | 49.48 | 0.8119  | 11293 |
| Zfp326         | A_52_P356853  | NM_018759          | zinc finger protein 326                                          | -1.189 | 61.79 | 0.67644 | 17326 P | 1.13   | 9.71  | 0.1288  | 3676  |
| Z310008M10Rik  | A_52_P592951  | NM_025509          | RIKEN cDNA Z310008M10 gene                                       | -1.19  | 69.29 | 0.80242 | 18075 M | 1.01   | 42.43 | 0.90778 | 12176 |
| Ddx5           | A_52_P611798  | NM_007840          | DEAD (Asp-Glu-Ala-Asp) box polypeptide domain containing protein | -1.19  | 69.29 | 0.79529 | 17826 M | 1.178  | 3.82  | 0.0408  | 1553  |
| Dlgap4         | A_52_P600038  | NM_146128          | discs, large homolog-associated protein 4                        | -1.19  | 57.76 | 0.59251 | 13043 P | -1.183 | 1.32  | 0.02492 | 1029  |
| Rnf128         | A_51_P268331  | NM_023270          | ring finger protein 128                                          | -1.19  | 61.79 | 0.65628 | 16409 P | -1.041 | 43.75 | 0.4549  | 8048  |
| Angpt1         | A_52_P574140  | NM_009640          | angiopoietin 1                                                   | -1.192 |       | 0.91293 | 13005 A | -1.219 | 0.56  | 0.01002 | 376   |
| Ehmt1          | A_51_P485768  | NM_172545          | euchromatic histone methyltransferase 1                          | -1.192 | 65.79 | 0.77774 | 17131 M | 1.02   | 40.63 | 0.76096 | 10866 |
| Elf2           | A_51_P496273  | NM_023502          | E74-like factor 2                                                | -1.192 | 53.87 | 0.57069 | 12073 P | 1.051  | 25.31 | 0.37536 | 7226  |
| Erf            | A_52_P326354  | NM_010155          | Ets2 repressor factor                                            | -1.192 | 61.79 | 0.65402 | 16310 P | -1.009 | 49.48 | 0.89188 | 11982 |
| Ifrd2          | A_51_P172251  | NM_025903          | interferon-related developmental regulator                       | -1.192 | 69.29 | 0.75687 | 21478 P | 1.095  | 11.33 | 0.12322 | 3561  |
| Mtss1          | A_52_P601055  | AK129139           | metastasis suppressor 1                                          | -1.192 | 69.29 | 0.81943 | 18899 M | 1.07   | 16.2  | 0.16913 | 4373  |
| Nsf            | A_52_P518715  | NM_008740          | N-ethylmaleimide sensitive fusion protein                        | -1.192 | 49.93 | 0.52779 | 10638 P | 1.051  | 28.13 | 0.55557 | 9073  |
| Pon1           | A_51_P108659  | NM_011134          | paraoxonase 1                                                    | -1.192 |       | 0.68356 | 14586 A | 1.02   | 38.4  | 0.7161  | 10458 |
| Ppp1cb         | A_51_P342716  | NM_172707          | protein phosphatase 1, catalytic subunit, brain                  | -1.192 | 69.29 | 0.82225 | 19032 M | -1.035 | 49.22 | 0.84595 | 11572 |
| Rnps1          | A_52_P41985   | NM_009070          | ribonucleic acid binding protein S1                              | -1.192 | 42.28 | 0.47073 | 8565 P  | 1.025  | 38.4  | 0.68767 | 10216 |
| Rps6ka1        | A_51_P150044  | NM_009097          | ribosomal protein S6 kinase polypeptide chain                    | -1.192 | 72.2  | 0.82276 | 25593 P | -1.001 | 49.48 | 0.9932  | 13003 |
| Sptlc2         | A_52_P59916   | NM_011479          | serine palmitoyltransferase, long chain base                     | -1.192 | 65.79 | 0.70327 | 18571 P | 1.016  | 42.43 | 0.82109 | 11373 |
| Trip11         | A_51_P176265  | BC025876           | thyroid hormone receptor interactor 11                           | -1.192 | 45.92 | 0.49191 | 9321 P  | 1.201  | 4.63  | 0.06781 | 2358  |
| Z1200014J11Rik | A_51_P101660  | NM_025818          | RIKEN cDNA Z1200014J11 gene                                      | -1.193 | 38.68 | 0.44699 | 7850 P  | -1.008 | 49.48 | 0.87466 | 11806 |
| Dffb           | A_52_P46742   | NM_007859          | DNA fragmentation factor, beta subunit                           | -1.193 | 72.2  | 0.83933 | 25236 P | 1.07   | 19.02 | 0.26529 | 5881  |
| Hip2           | A_51_P363714  | NM_016786          | huntingtin interacting protein 2                                 | -1.193 | 45.92 | 0.49841 | 9606 P  | 1.027  | 33.49 | 0.56467 | 9163  |
| Slc2a6         | A_51_P268831  | NM_172659          | solute carrier family 2 (facilitated glucose transporter)        | -1.193 | 57.76 | 0.59557 | 13266 P | -1.126 | 8.32  | 0.09995 | 3102  |
| Tnrc4          | A_51_P106591  | NM_172434          | trinucleotide repeat containing 4                                | -1.193 | 61.79 | 0.70185 | 14037 M | 1.119  | 16.2  | 0.43068 | 7838  |
| Unc93b1        | A_52_P507382  | NM_019449          | unc-93 homolog B1 (C. elegans)                                   | -1.193 | 53.87 | 0.55666 | 11634 P | -1.022 | 47.43 | 0.60474 | 9487  |
| Zfp330         | A_52_P537466  | NM_145600          | zinc finger protein 330                                          | -1.193 | 72.2  | 0.85249 | 27896 P | 1.03   | 33.49 | 0.52265 | 8775  |
| Z410015N17Rik  | A_51_P158876  | NM_023203          | RIKEN cDNA Z410015N17 gene                                       | -1.195 | 57.76 | 0.6233  | 14606 P | 1.015  | 42.43 | 0.7827  | 11021 |
| Z810432D09Rik  | A_51_P411130  | NM_027278          | RIKEN cDNA Z810432D09 gene                                       | -1.195 | 61.79 | 0.64753 | 15985 P | -1.058 | 38.4  | 0.31686 | 6548  |
| Etf1           | A_52_P585350  | AK038771           | eukaryotic translation termination factor                        | -1.195 | 72.2  | 0.81398 | 24976 P | 1.031  | 36.07 | 0.62622 | 9680  |
| Klf1           | A_51_P168630  | NM_010635          | Kruppel-like factor 1 (erythroid)                                | -1.195 | 75.14 | 0.89176 | 30396 M | 1.039  | 25.31 | 0.3592  | 6996  |
| Lrp5           | A_51_P364168  | NM_008513          | low density lipoprotein receptor-related protein 5               | -1.195 | 38.68 | 0.45903 | 8178 P  | 1.109  | 19.02 | 0.47063 | 8203  |
| Ppp2r5a        | A_52_P108952  | NM_144880          | protein phosphatase 2, regulatory subunit 5                      | -1.195 | 53.87 | 0.55427 | 11576 P | 1.038  | 30.75 | 0.46054 | 8108  |
| Slc35a4        | A_51_P121412  | NM_026404          | solute carrier family 35, member A4                              | -1.195 | 31.88 | 0.43241 | 7426 P  | -1.031 | 46.85 | 0.65026 | 9883  |
| AK122209       | A_52_P484118  | NM_001029876       | cDNA sequence AK122209                                           | -1.196 | 53.87 | 0.54147 | 11062 P | 1      | 49.48 | 0.99655 | 13023 |
| Aprin          | A_52_P24783   | NM_175310          | androgen-induced proliferation inhibitor                         | -1.196 | 65.79 | 0.70178 | 18495 P | -1.031 | 48.39 | 0.75016 | 10788 |



|               |              |           |                                             |        |       |         |         |        |       |         |       |
|---------------|--------------|-----------|---------------------------------------------|--------|-------|---------|---------|--------|-------|---------|-------|
| Dolpp1        | A_51_P246690 | NM_020329 | dolichyl pyrophosphate phosphatase 1        | -1.196 | 38.68 | 0.45088 | 7931 P  | 1.061  | 19.02 | 0.24577 | 5579  |
| Etv1          | A_51_P307979 | NM_007960 | ets variant gene 1                          | -1.196 | 65.79 | 0.70335 | 18588 P | -1.052 | 44.4  | 0.6265  | 9685  |
| Nup54         | A_52_P131584 | AK014260  | nucleoporin 54                              | -1.196 | 65.79 | 0.73835 | 20571 P | 1.025  | 40.63 | 0.81937 | 11349 |
| Rdh5          | A_51_P479618 | NM_134006 | retinol dehydrogenase 5                     | -1.196 | 61.79 | 0.63777 | 15609 P | -1.09  | 22.1  | 0.19195 | 4769  |
| Scd1          | A_52_P682382 | NM_009127 | stearoyl-Coenzyme A desaturase 1            | -1.196 | 57.76 | 0.58431 | 12737 P | -1.208 | 19.02 | 0.38943 | 7389  |
| Sepx1         | A_51_P393634 | NM_013759 | selenoprotein X 1                           | -1.196 | 65.79 | 0.68819 | 17843 P | 1.077  | 11.33 | 0.12552 | 3618  |
| Tnrc9         | A_51_P465082 | NM_172913 | TOX high mobility group box family memt     | -1.196 | 57.76 | 0.59506 | 13239 P | -1.153 | 9.71  | 0.18293 | 4624  |
| 9430015G10Rik | A_51_P462862 | NM_145557 | RIKEN cDNA 9430015G10 gene                  | -1.198 | 53.87 | 0.56988 | 12054 P | -1.042 | 43.15 | 0.38085 | 7283  |
| Apobec3       | A_52_P645410 | NM_030255 | apolipoprotein B editing complex 3          | -1.198 | 61.79 | 0.63553 | 15496 P | -1.042 | 40.63 | 0.32455 | 6610  |
| Dullard       | A_51_P515585 | NM_026017 | Dullard homolog (Xenopus laevis)            | -1.198 | 53.87 | 0.54946 | 11418 P | -1.1   | 19.02 | 0.1985  | 4874  |
| Mmab          | A_52_P111830 | NM_029956 | methylmalonic aciduria (cobalamin defici    | -1.198 | 65.79 | 0.71369 | 19159 P | -1.032 | 46.85 | 0.63755 | 9780  |
| Phf2          | A_52_P686091 | NM_011078 | PHD finger protein 2                        | -1.198 | 57.76 | 0.69909 | 13908 M | 1.054  | 22.1  | 0.34764 | 6843  |
| 2610020O08Rik | A_51_P159746 | NM_025937 | RIKEN cDNA 2610020O08 gene                  | -1.199 | 53.87 | 0.57961 | 12467 P | -1.021 | 48.7  | 0.68922 | 10233 |
| Brpf3         | A_52_P34420  | AK147555  | bromodomain and PHD finger containing       | -1.199 | 53.87 | 0.55853 | 11679 P | 1.167  | 6.98  | 0.10051 | 3116  |
| Ccl20         | A_51_P408595 | NM_016960 | chemokine (C-C motif) ligand 20             | -1.199 | 69.29 | 0.77068 | 22246 P | 1.152  | 5.75  | 0.06761 | 2351  |
| Dyx1c1        | A_51_P332264 | NM_026314 | dyslexia susceptibility 1 candidate 1 hom   | -1.199 | 49.93 | 0.52449 | 10513 P | 1.099  | 9.71  | 0.09716 | 3042  |
| Rqcd1         | A_52_P110068 | NM_021383 | rcd1 (required for cell differentiation) ho | -1.199 | 42.28 | 0.46905 | 8485 P  | 1.098  | 11.33 | 0.15413 | 4118  |
| Snx9          | A_51_P371323 | NM_025664 | sorting nexin 9                             | -1.199 | 61.79 | 0.66067 | 16596 P | 1.053  | 22.1  | 0.28542 | 6155  |
| 2310022B05Rik | A_52_P434556 | NM_175149 | RIKEN cDNA 2310022B05 gene                  | -1.2   | 72.2  | 0.81904 | 25365 P | 1.035  | 30.75 | 0.45074 | 8002  |
| 4930503L19Rik | A_52_P515907 | NM_172967 | RIKEN cDNA 4930503L19 gene                  | -1.2   | 65.79 | 0.72951 | 20194 P | -1.029 | 45.68 | 0.51223 | 8693  |
| Arg1          | A_51_P303160 | NM_007482 | arginase 1, liver                           | -1.2   | 57.76 | 0.62335 | 14609 P | -1.092 | 33.49 | 0.43136 | 7848  |
| Jmjd2c        | A_52_P8320   | AK039000  | jumonji domain containing 2C                | -1.2   | 79.26 | 0.77816 | 18255 M | 1.064  | 19.02 | 0.21892 | 5189  |
| Neurod1       | A_52_P408391 | NM_010894 | neurogenic differentiation 1                | -1.2   | 57.76 | 0.61575 | 14186 P | 1.059  | 19.02 | 0.26009 | 5811  |
| Ppp1r15b      | A_51_P274091 | BC058078  | protein phosphatase 1, regulatory (inhibit  | -1.2   | 53.87 | 0.54946 | 11412 P | 1.117  | 8.32  | 0.08984 | 2894  |
| Ralbp1        | A_51_P260490 | NM_009067 | ralA binding protein 1                      | -1.2   | 61.79 | 0.72991 | 15462 M | 1.023  | 38.4  | 0.75347 | 10812 |
| Tacstd1       | A_52_P447944 | NM_008532 | tumor-associated calcium signal transduc    | -1.2   | 65.79 | 0.73404 | 20424 P | 1.182  | 3.82  | 0.05265 | 1938  |
| 3000004C01Rik | A_52_P520466 | NM_197959 | RIKEN cDNA 3000004C01 gene                  | -1.202 | 61.79 | 0.77139 | 14225 A | -1.01  | 49.48 | 0.8717  | 11779 |
| AU042671      | A_51_P450764 | AK037367  | expressed sequence AU042671                 | -1.202 | 61.79 | 0.6618  | 16661 P | -1.064 | 28.13 | 0.19298 | 4793  |
| Csrp2         | A_51_P300337 | NM_007792 | cysteine and glycine-rich protein 2         | -1.202 | 61.79 | 0.64229 | 15822 P | 1.114  | 9.71  | 0.11181 | 3314  |
| Cugbp1        | A_51_P431558 | AK033771  | CUG triplet repeat, RNA binding protein 1   | -1.202 | 57.76 | 0.67779 | 13124 M | 1.077  | 19.02 | 0.31098 | 6467  |
| Erh           | A_52_P811874 | AK078010  | enhancer of rudimentary homolog (Dros       | -1.202 | 69.29 | 0.75317 | 21291 P | -1.06  | 38.4  | 0.33584 | 6742  |
| Prkcd         | A_51_P460734 | NM_011103 | protein kinase C, delta                     | -1.202 | 53.87 | 0.5509  | 11465 P | 1.05   | 28.13 | 0.49834 | 8563  |
| Sdc1          | A_52_P479269 | NM_011519 | syndecan 1                                  | -1.202 | 79.26 | 0.93021 | 33839 P | -1.012 | 49.48 | 0.82002 | 11359 |
| 5930416I19Rik | A_52_P268549 | NM_197981 | RIKEN cDNA 5930416I19 gene                  | -1.203 | 61.79 | 0.6755  | 17290 P | -1.202 | 1.18  | 0.01985 | 845   |
| Atp1a1        | A_52_P515497 | NM_144900 | ATPase, Na+/K+ transporting, alpha 1 pol    | -1.203 | 61.79 | 0.7216  | 14937 M | 1.103  | 9.71  | 0.08637 | 2810  |
| Cenpb         | A_52_P262250 | NM_007682 | centromere protein B                        | -1.203 | 45.92 | 0.49249 | 9351 P  | 1.013  | 42.43 | 0.81133 | 11291 |
| Cldn7         | A_51_P165185 | NM_016887 | claudin 7                                   | -1.203 | 42.28 | 0.52207 | 9533 P  | 1.013  | 42.43 | 0.81422 | 11322 |
| Gab1          | A_52_P417437 | NM_021356 | growth factor receptor bound protein 2-a    | -1.203 | 45.92 | 0.49311 | 9365 P  | 1.037  | 28.13 | 0.42425 | 7767  |
| Hipk1         | A_52_P235929 | NM_010432 | homeodomain interacting protein kinase      | -1.203 | 49.93 | 0.52957 | 10724 P | 1.091  | 11.33 | 0.13896 | 3821  |
| Kcnk5         | A_52_P514352 | NM_021542 | potassium channel, subfamily K, member      | -1.203 | 49.93 | 0.53228 | 10794 P | 1.038  | 33.49 | 0.63871 | 9796  |
| Parp1         | A_51_P314277 | NM_007415 | poly (ADP-ribose) polymerase family, mer    | -1.203 | 49.93 | 0.51432 | 10101 P | 1.046  | 25.31 | 0.3489  | 6858  |
| Acvr1         | A_52_P352131 | NM_007394 | activin A receptor, type 1                  | -1.205 | 49.93 | 0.51819 | 10276 P | 1.091  | 13.58 | 0.21709 | 5152  |
| Cd36          | A_51_P375138 | L23108    | CD36 antigen                                | -1.205 | 61.79 | 0.64241 | 15824 P | -1.355 | 0.51  | 0.0144  | 604   |
| D130051D11Rik | A_52_P555808 | AK083890  | RIKEN cDNA D130051D11 gene                  | -1.205 | 61.79 | 0.6328  | 15360 P | 1.123  | 8.32  | 0.07248 | 2452  |
| Fzd3          | A_51_P190863 | NM_021458 | frizzled homolog 3 (Drosophila)             | -1.205 | 45.92 | 0.48882 | 9200 P  | 1.129  | 11.33 | 0.26529 | 5882  |
| Hlf           | A_51_P134228 | NM_172563 | hepatic leukemia factor                     | -1.205 | 65.79 | 0.70407 | 18638 P | 1.035  | 30.75 | 0.50164 | 8595  |
| Iars          | A_52_P200617 | NM_172015 | isoleucine-tRNA synthetase                  | -1.205 | 49.93 | 0.51244 | 10031 P | 1.008  | 42.43 | 0.92249 | 12289 |
| Osbpl11       | A_51_P223199 | NM_176840 | oxysterol binding protein-like 11           | -1.205 | 38.68 | 0.43241 | 7416 P  | 1.081  | 19.02 | 0.30021 | 6319  |
| Polr3k        | A_52_P240453 | NM_025901 | polymerase (RNA) III (DNA directed) poly    | -1.205 | 53.87 | 0.57399 | 12191 P | -1.08  | 33.49 | 0.34537 | 6824  |
| Rrs1          | A_52_P579640 | NM_021511 | RRS1 ribosome biogenesis regulator hom      | -1.205 | 61.79 | 0.63754 | 15599 P | 1.054  | 22.1  | 0.31544 | 6529  |
| Tm9sf1        | A_51_P455410 | NM_028780 | transmembrane 9 superfamily member 1        | -1.205 | 38.68 | 0.58125 | 10103 M | -1.007 | 49.48 | 0.90099 | 12100 |
| Tram1         | A_51_P499169 | NM_028173 | translocating chain-associating membran     | -1.205 | 53.87 | 0.63918 | 11847 M | 1.053  | 28.13 | 0.47441 | 8256  |
| 4933426M11Rik | A_52_P666646 | NM_178682 | RIKEN cDNA 4933426M11 gene                  | -1.206 | 53.87 | 0.56811 | 11985 P | 1.139  | 6.98  | 0.06114 | 2172  |

|               |               |                    |                                             |        |       |         |         |        |       |         |       |
|---------------|---------------|--------------------|---------------------------------------------|--------|-------|---------|---------|--------|-------|---------|-------|
| Copz2         | A_52_P180310  | BF100712           | coatamer protein complex, subunit zeta 2    | -1.206 | 53.87 | 0.57914 | 11898 M | -1.053 | 40.63 | 0.35931 | 6998  |
| Elk1          | A_52_P1028571 | AK082260           | ELK1, member of ETS oncogene family         | -1.206 | 49.93 | 0.53335 | 10830 P | 1.18   | 3.82  | 0.04067 | 1548  |
| Hmga1         | A_51_P483118  | NM_016660          | high mobility group AT-hook 1               | -1.206 | 45.92 | 0.49187 | 9317 P  | 1.074  | 13.58 | 0.13456 | 3757  |
| Maml1         | A_51_P104861  | NM_175334          | mastermind like 1 (Drosophila)              | -1.206 | 61.79 | 0.68577 | 17726 P | 1.133  | 6.98  | 0.06967 | 2390  |
| Rbpsuhl       | A_52_P574759  | NM_009036          | recombination signal binding protein for i  | -1.206 | 72.2  | 0.81652 | 25182 P | 1.179  | 5.75  | 0.07656 | 2566  |
| Sox15         | A_51_P440440  | NM_009235          | SRY-box containing gene 15                  | -1.206 | 57.76 | 0.64378 | 14921 M | 1.011  | 42.43 | 0.82646 | 11423 |
| Usf2          | A_52_P647919  | U01663             | upstream transcription factor 2             | -1.206 | 57.76 | 0.60765 | 13803 P | -1.02  | 49.48 | 0.83204 | 11479 |
| Ccbl1         | A_51_P220055  | NM_172404          | cysteine conjugate-beta lyase 1             | -1.208 | 42.28 | 0.46682 | 8439 P  | 1.09   | 13.58 | 0.20566 | 4983  |
| Hipk2         | A_52_P554845  | NM_010433          | homeodomain interacting protein kinase      | -1.208 | 61.79 | 0.64225 | 15816 P | 1.097  | 13.58 | 0.20332 | 4944  |
| Igfbp5        | A_52_P281702  | NM_010518          | insulin-like growth factor binding protein  | -1.208 | 75.14 | 0.77768 | 18601 M | 1.138  | 13.58 | 0.37353 | 7210  |
| Il11ra1       | A_51_P353946  | NM_010549          | interleukin 11 receptor, alpha chain 1      | -1.208 | 45.92 | 0.49037 | 9243 P  | 1.03   | 38.4  | 0.73869 | 10672 |
| Nkx6-1        | A_51_P441153  | NM_144955          | NK6 transcription factor related, locus 1 ( | -1.208 | 57.76 | 0.61013 | 13955 P | 1.003  | 42.43 | 0.96907 | 12737 |
| Pnn           | A_51_P121793  | NM_008891          | pinin                                       | -1.208 | 57.76 | 0.61261 | 14100 P | 1.032  | 36.07 | 0.66863 | 10032 |
| Rnf38         | A_52_P469767  | AK044324           | ring finger protein 38                      | -1.208 |       | 0.90544 | 12780 A | -1.013 | 49.48 | 0.8769  | 11825 |
| Ythdf1        | A_51_P488799  | NM_173761          | YTH domain family 1                         | -1.208 | 45.92 | 0.4726  | 8694 P  | 1.084  | 19.02 | 0.41349 | 7662  |
| Calr          | A_51_P416419  | NM_007591          | calreticulin                                | -1.209 | 65.79 | 0.75317 | 16208 M | 1.162  | 4.63  | 0.04831 | 1805  |
| Ccnd3         | A_51_P238448  | NM_007632          | cyclin D3                                   | -1.209 | 49.93 | 0.52496 | 10541 P | -1.161 | 2.04  | 0.03176 | 1249  |
| Gda           | A_51_P291950  | NM_010266          | guanine deaminase                           | -1.209 |       | 0.78867 | 18750 A | -1.3   | 0.51  | 0.00756 | 285   |
| Podxl         | A_52_P380263  | NM_013723          | podocalyxin-like                            | -1.209 | 65.79 | 0.75002 | 21073 P | 1.17   | 5.75  | 0.08811 | 2842  |
| Zfp661        | A_51_P105869  | NM_028141          | zinc finger protein 661                     | -1.209 | 61.79 | 0.65972 | 16578 P | -1.119 | 16.2  | 0.21643 | 5134  |
| Cdk6          | A_51_P388310  | NM_009873          | cyclin-dependent kinase 6                   | -1.211 | 61.79 | 0.66359 | 16759 P | 1.229  | 3.01  | 0.03709 | 1410  |
| Gja1          | A_52_P174915  | NM_010288          | gap junction membrane channel protein a     | -1.211 | 61.79 | 0.67019 | 17058 P | 1.146  | 8.32  | 0.13213 | 3715  |
| Pdlim1        | A_52_P283426  | ENSMUST00000068439 | PDZ and LIM domain 1 (elfin)                | -1.211 | 83.95 | 0.84753 | 21903 M | -1.159 | 2.04  | 0.03098 | 1223  |
| Pols          | A_52_P380329  | NM_198600          | polymerase (DNA directed) sigma             | -1.211 | 53.87 | 0.54891 | 11381 P | 1.133  | 11.33 | 0.23108 | 5363  |
| Preb          | A_51_P135037  | AK029838           | prolactin regulatory element binding        | -1.211 | 57.76 | 0.60253 | 13556 P | 1.012  | 42.43 | 0.8699  | 11757 |
| Psmc3         | A_51_P130427  | NM_009439          | proteasome (prosome, macropain) 26S su      | -1.211 | 53.87 | 0.57363 | 11674 P | -1.047 | 43.15 | 0.4504  | 7996  |
| Selenbp1      | A_52_P629487  | NM_009150          | selenium binding protein 1                  | -1.211 | 53.87 | 0.54327 | 11130 P | -1.084 | 19.02 | 0.14642 | 3970  |
| Smad1         | A_51_P409260  | NM_008539          | MAD homolog 1 (Drosophila)                  | -1.211 | 65.79 | 0.72221 | 19767 P | 1.054  | 22.1  | 0.31486 | 6521  |
| Stip1         | A_52_P57249   | AK080936           | stress-induced phosphoprotein 1             | -1.211 | 75.14 | 0.86488 | 28509 P | 1.021  | 40.63 | 0.74306 | 10730 |
| 2810004A10Rik | A_51_P253732  | NM_027265          | interleukin 17 receptor D                   | -1.212 | 49.93 | 0.52719 | 10613 P | -1.24  | 0.66  | 0.01141 | 452   |
| 9830124H08Rik | A_52_P277695  | AK165863           | RIKEN cDNA 9830124H08 gene                  | -1.212 | 42.28 | 0.57961 | 10028 M | 1.229  | 4.63  | 0.08963 | 2887  |
| Lfng          | A_52_P187940  | ENSMUST00000031555 | lunatic fringe gene homolog (Drosophila)    | -1.212 | 61.79 | 0.65158 | 16141 P | 1.037  | 33.49 | 0.57465 | 9225  |
| Prom2         | A_52_P452667  | NM_178047          | prominin 2                                  | -1.212 | 57.76 | 0.59834 | 13369 P | -1.116 | 13.58 | 0.15736 | 4169  |
| Rcor3         | A_52_P338033  | AK135612           | REST corepressor 3                          | -1.212 | 28.61 | 0.39742 | 6443 P  | 1.098  | 13.58 | 0.23218 | 5381  |
| Slc35c1       | A_52_P144062  | NM_211358          | solute carrier family 35, member C1         | -1.212 | 45.92 | 0.48675 | 9153 M  | 1.068  | 19.02 | 0.25067 | 5651  |
| Tpx2          | A_51_P369200  | NM_028109          | TPX2, microtubule-associated protein hor    | -1.212 | 65.79 | 0.70411 | 17703 M | -1.28  | 0.56  | 0.0141  | 591   |
| Zzef1         | A_51_P114336  | AK018382           | zinc finger, ZZ-type with EF hand domain    | -1.212 | 53.87 | 0.55427 | 11577 P | 1.206  | 1.58  | 0.01101 | 426   |
| Capg          | A_51_P273921  | NM_007599          | capping protein (actin filament), gelsolin- | -1.214 | 75.14 | 0.86348 | 28404 P | 1.058  | 19.02 | 0.23607 | 5432  |
| Cnot6         | A_52_P544032  | NM_212484          | CCR4-NOT transcription complex, subunit     | -1.214 | 31.88 | 0.40381 | 6577 P  | -1.015 | 49.48 | 0.82758 | 11438 |
| Pygo2         | A_52_P362128  | NM_026869          | pygopus 2                                   | -1.214 | 42.28 | 0.46777 | 8453 P  | 1.008  | 42.43 | 0.89905 | 12057 |
| Trim11        | A_52_P548940  | NM_053168          | tripartite motif protein 11                 | -1.214 | 53.87 | 0.57322 | 12152 P | -1.079 | 33.49 | 0.3375  | 6755  |
| 2310042G06Rik | A_51_P381749  | NM_025531          | slowmo homolog 2 (Drosophila)               | -1.215 | 28.61 | 0.5486  | 9186 M  | 1.016  | 42.43 | 0.86142 | 11689 |
| Cd83          | A_51_P199135  | NM_009856          | CD83 antigen                                | -1.215 | 65.79 | 0.7185  | 19419 P | 1.004  | 42.43 | 0.97816 | 12821 |
| Tmcc2         | A_51_P454993  | NM_178874          | transmembrane and coiled-coil domains       | -1.215 | 61.79 | 0.69094 | 17957 P | 1.068  | 16.2  | 0.1701  | 4386  |
| Txndc4        | A_52_P12001   | NM_029572          | thioredoxin domain containing 4 (endopl     | -1.215 | 23.47 | 0.38726 | 6109 P  | 1.107  | 8.32  | 0.06459 | 2270  |
| Hpn           | A_51_P434483  | NM_008281          | hepsin                                      | -1.217 | 38.68 | 0.43021 | 7343 P  | -1.008 | 49.48 | 0.92316 | 12322 |
| L3mbtl2       | A_51_P245393  | NM_145993          | l(3)mbt-like 2 (Drosophila)                 | -1.217 | 57.76 | 0.62828 | 14893 P | 1.099  | 9.71  | 0.09699 | 3034  |
| Ogdh          | A_52_P369310  | NM_010956          | oxoglutarate dehydrogenase (lipoamide)      | -1.217 | 49.93 | 0.51076 | 9964 P  | 1.02   | 38.4  | 0.68081 | 10141 |
| Usp4          | A_52_P116384  | NM_011678          | ubiquitin specific peptidase 4 (proto-onc   | -1.217 | 49.93 | 0.51147 | 9990 P  | 1.121  | 11.33 | 0.20738 | 5013  |
| Aggf1         | A_51_P496769  | NM_025630          | angiogenic factor with G patch and FHA d    | -1.218 | 28.61 | 0.39281 | 6242 P  | -1.013 | 49.48 | 0.86781 | 11742 |
| Arf4          | A_51_P295625  | NM_007479          | ADP-ribosylation factor 4                   | -1.218 | 35.45 | 0.55853 | 9442 M  | 1.177  | 3.82  | 0.04494 | 1669  |
| Clk3          | A_52_P559498  | NM_007713          | CDC-like kinase 3                           | -1.218 | 25.79 | 0.38425 | 6014 P  | 1.034  | 33.49 | 0.64956 | 9880  |
| Fgl2          | A_52_P266132  | NM_008013          | fibrinogen-like protein 2                   | -1.218 | 53.87 | 0.57306 | 12142 P | -1.057 | 45.68 | 0.71087 | 10409 |

|               |              |           |                                              |        |       |         |         |        |       |         |       |
|---------------|--------------|-----------|----------------------------------------------|--------|-------|---------|---------|--------|-------|---------|-------|
| Slc22a17      | A_51_P111902 | NM_021551 | solute carrier family 22 (organic cation tra | -1.218 | 53.87 | 0.54628 | 11265 P | -1.084 | 30.75 | 0.31627 | 6543  |
| Synpo         | A_51_P123676 | AK034012  | synaptopodin                                 | -1.218 | 45.92 | 0.4705  | 8549 P  | -1.002 | 49.48 | 0.98199 | 12880 |
| 1200002N14Rik | A_51_P481482 | NM_027878 | RIKEN cDNA 1200002N14 gene                   | -1.22  | 72.2  | 0.84604 | 27486 P | 1.081  | 11.33 | 0.1217  | 3537  |
| Golga4        | A_51_P112789 | NM_018748 | golgi autoantigen, golgin subfamily a, 4     | -1.22  | 57.76 | 0.66588 | 12756 M | 1.157  | 4.63  | 0.04747 | 1779  |
| Jub           | A_52_P131548 | NM_010590 | ajuba                                        | -1.22  | 69.29 | 0.79639 | 23897 P | 1.113  | 9.71  | 0.12087 | 3507  |
| Slc7a10       | A_51_P268193 | NM_017394 | solute carrier family 7 (cationic amino aci  | -1.22  | 65.79 | 0.70219 | 18517 P | -1.289 | 0.56  | 0.01509 | 645   |
| U2af2         | A_51_P358908 | NM_133671 | U2 small nuclear ribonucleoprotein auxili    | -1.22  | 49.93 | 0.5012  | 9678 P  | 1.061  | 19.02 | 0.26276 | 5847  |
| Es2el         | A_52_P315483 | BC013711  | expressed sequence 2 embryonic lethal        | -1.221 | 45.92 | 0.49187 | 9316 P  | 1.04   | 30.75 | 0.48291 | 8358  |
| Fbxo3         | A_52_P336357 | NM_212433 | F-box protein 3                              | -1.221 | 42.28 | 0.46325 | 8332 P  | -1.027 | 46.3  | 0.56533 | 9167  |
| Galnt2        | A_51_P370350 | NM_139272 | UDP-N-acetyl-alpha-D-galactosamine:pol       | -1.221 | 45.92 | 0.48052 | 8958 P  | 1.109  | 6.98  | 0.05908 | 2111  |
| Hmgrcr        | A_51_P507410 | NM_008255 | 3-hydroxy-3-methylglutaryl-Coenzyme A        | -1.221 | 61.79 | 0.6451  | 15914 P | 1.059  | 22.1  | 0.36027 | 7025  |
| Ak311         | A_51_P428582 | NM_009647 | adenylate kinase 3 alpha-like 1              | -1.222 | 45.92 | 0.4955  | 9457 P  | 1.076  | 16.2  | 0.2722  | 5986  |
| Efna1         | A_51_P266683 | NM_010107 | ephrin A1                                    | -1.222 | 61.79 | 0.64816 | 16013 P | -1.146 | 2.04  | 0.02996 | 1195  |
| Fev           | A_51_P518841 | NM_153111 | FEV (ETS oncogene family)                    | -1.222 | 61.79 | 0.73282 | 15586 M | 1.008  | 42.43 | 0.89642 | 12017 |
| Grn           | A_52_P508750 | NM_008175 | granulin                                     | -1.222 | 53.87 | 0.55958 | 11737 P | -1.071 | 28.13 | 0.19543 | 4829  |
| Gtl2          | A_51_P455997 | XM_981786 | GTL2, imprinted maternally expressed un      | -1.222 | 69.29 | 0.82214 | 22470 P | 1.416  | 3.82  | 0.17953 | 4564  |
| Mdm2          | A_52_P469842 | NM_010786 | transformed mouse 3T3 cell double minu       | -1.222 | 25.79 | 0.37646 | 5781 P  | 1.104  | 8.32  | 0.06848 | 2370  |
| R74862        | A_51_P210457 | NM_133790 | expressed sequence R74862                    | -1.222 | 57.76 | 0.61846 | 14326 P | 1.008  | 42.43 | 0.91896 | 12264 |
| Sema4d        | A_51_P146320 | NM_013660 | sema domain, immunoglobulin domain (I        | -1.222 | 57.76 | 0.61652 | 14213 P | 1.168  | 2.53  | 0.01781 | 757   |
| Snrp70        | A_52_P501767 | BC049128  | U1 small nuclear ribonucleoprotein polyp     | -1.222 | 65.79 | 0.7471  | 20934 P | -1.01  | 49.48 | 0.882   | 11878 |
| Trpv6         | A_51_P479029 | NM_022413 | transient receptor potential cation chann    | -1.222 | 65.79 | 0.7101  | 18949 M | -1.159 | 1.32  | 0.02084 | 888   |
| 1200013P24Rik | A_51_P378777 | NM_029090 | RIKEN cDNA 1200013P24 gene                   | -1.224 | 72.2  | 0.82225 | 25543 P | -1.013 | 49.48 | 0.8576  | 11653 |
| 2010305C02Rik | A_51_P328622 | NM_027249 | RIKEN cDNA 2010305C02 gene                   | -1.224 | 65.79 | 0.71608 | 19278 P | -1.019 | 49    | 0.69138 | 10249 |
| Fos           | A_52_P262219 | NM_010234 | FBJ osteosarcoma oncogene                    | -1.224 | 69.29 | 0.79166 | 17656 M | 1.163  | 6.98  | 0.08874 | 2860  |
| Frm4b         | A_51_P392350 | NM_145148 | FERM domain containing 4B                    | -1.224 | 53.87 | 0.58125 | 12557 P | 1.061  | 19.02 | 0.20824 | 5026  |
| Gars          | A_52_P585475 | NM_180678 | glycyl-tRNA synthetase                       | -1.224 | 53.87 | 0.55093 | 11467 P | -1.027 | 46.85 | 0.61536 | 9583  |
| Hspa5         | A_51_P395098 | NM_022310 | heat shock 70kD protein 5 (glucose-regul     | -1.224 | 42.28 | 0.57955 | 10012 M | 1.1    | 16.2  | 0.32883 | 6656  |
| Nudt13        | A_52_P166868 | BC038023  | nudix (nucleoside diphosphate linked mo      | -1.224 | 61.79 | 0.65256 | 16223 P | 1.18   | 4.63  | 0.05893 | 2101  |
| Prkacb        | A_52_P432680 | NM_011100 | protein kinase, cAMP dependent, catalyti     | -1.224 | 38.68 | 0.55763 | 9419 M  | 1.102  | 13.58 | 0.21849 | 5178  |
| Thap4         | A_51_P345110 | NM_025920 | THAP domain containing 4                     | -1.224 | 45.92 | 0.48787 | 9182 P  | 1.049  | 25.31 | 0.3972  | 7490  |
| Zmynd17       | A_51_P369426 | AK014794  | zinc finger, MYND domain containing 17       | -1.224 | 65.79 | 0.70976 | 18931 P | 1.043  | 28.13 | 0.4301  | 7823  |
| 1810007P19Rik | A_52_P579448 | NM_172701 | RIKEN cDNA 1810007P19 gene                   | -1.225 | 61.79 | 0.6422  | 15814 P | -1.291 | 0.51  | 0.00637 | 174   |
| 4933424B01Rik | A_51_P140607 | NM_138757 | RIKEN cDNA 4933424B01 gene                   | -1.225 | 35.45 | 0.40896 | 6692 P  | -1.022 | 48.7  | 0.71347 | 10432 |
| 9330107J05Rik | A_52_P166735 | AK047625  | RIKEN cDNA 4930431J08 gene                   | -1.225 | 72.2  | 0.81663 | 25197 P | -1.212 | 1.1   | 0.01896 | 801   |
| Clic1         | A_51_P357341 | NM_033444 | chloride intracellular channel 1             | -1.225 | 57.76 | 0.67779 | 13125 M | 1.185  | 3.46  | 0.02811 | 1141  |
| Fbxo42        | A_52_P586671 | NM_172518 | F-box protein 42                             | -1.225 | 45.92 | 0.4781  | 8893 P  | 1.184  | 4.63  | 0.06285 | 2229  |
| Hnrpm         | A_51_P170946 | NM_029804 | heterogeneous nuclear ribonucleoprotein      | -1.225 | 61.79 | 0.72951 | 15444 M | 1.174  | 4.63  | 0.05931 | 2127  |
| Lsp1          | A_52_P63044  | NM_019391 | lymphocyte specific 1                        | -1.225 | 65.79 | 0.75819 | 21512 P | -1.103 | 22.1  | 0.22532 | 5277  |
| Mxd4          | A_52_P528996 | AK040356  | Max dimerization protein 4                   | -1.225 | 61.79 | 0.67305 | 17205 P | 1.03   | 36.07 | 0.65501 | 9919  |
| Ppid          | A_52_P485700 | NM_026352 | peptidylprolyl isomerase D (cyclophilin D)   | -1.225 | 45.92 | 0.46598 | 8403 P  | -1.037 | 46.85 | 0.68382 | 10179 |
| Tk1           | A_51_P224013 | NM_009387 | thymidine kinase 1                           | -1.225 | 75.14 | 0.8666  | 28625 P | -1.052 | 38.4  | 0.26659 | 5895  |
| Vil2          | A_51_P413348 | NM_009510 | villin 2                                     | -1.225 | 49.93 | 0.51518 | 10107 P | 1.375  | 0.75  | 0.01102 | 427   |
| 9030624J02Rik | A_52_P421972 | AK035840  | RIKEN cDNA 9030624J02 gene                   | -1.227 |       | 0.82563 | 13483 A | -1.06  | 36.07 | 0.28839 | 6192  |
| Ptprn         | A_51_P318510 | NM_008985 | protein tyrosine phosphatase, receptor ty    | -1.227 | 49.93 | 0.52286 | 10447 P | -1.027 | 47.43 | 0.66555 | 10006 |
| Smarca4       | A_51_P479733 | NM_011417 | SWI/SNF related, matrix associated, actin    | -1.227 | 61.79 | 0.6857  | 17695 P | 1.121  | 9.71  | 0.11667 | 3413  |
| Ddost         | A_51_P216075 | NM_007838 | dolichyl-di-phosphooligosaccharide-prote     | -1.229 | 35.45 | 0.54396 | 9041 M  | -1.096 | 11.33 | 0.09872 | 3080  |
| Ibtk          | A_52_P311491 | BC060722  | inhibitor of Bruton agammaglobulinemia       | -1.229 | 45.92 | 0.56738 | 10336 M | 1.133  | 9.71  | 0.1612  | 4238  |
| Plekhh3       | A_51_P327369 | AK080928  | pleckstrin homology domain containing, f     | -1.229 | 53.87 | 0.5505  | 11452 P | 1.024  | 36.07 | 0.58534 | 9304  |
| Slc35b2       | A_52_P427564 | NM_028662 | solute carrier family 35, member B2          | -1.229 | 42.28 | 0.4608  | 8250 P  | -1.032 | 45.68 | 0.52517 | 8799  |
| Wdr12         | A_52_P161167 | NM_021312 | WD repeat domain 12                          | -1.229 | 57.76 | 0.61005 | 13939 P | -1.04  | 43.75 | 0.41142 | 7620  |
| Hipk3         | A_52_P76829  | NM_010434 | homeodomain interacting protein kinase       | -1.23  | 61.79 | 0.68445 | 17633 P | -1.008 | 49.48 | 0.92526 | 12346 |
| Mcl1          | A_51_P238786 | NM_008562 | myeloid cell leukemia sequence 1             | -1.23  | 25.79 | 0.52286 | 8480 M  | 1.142  | 11.33 | 0.27207 | 5984  |
| Zbtb17        | A_51_P463849 | NM_009541 | zinc finger and BTB domain containing 17     | -1.23  | 38.68 | 0.41247 | 6841 P  | -1.152 | 3.82  | 0.06417 | 2261  |

|               |              |              |                                              |        |       |         |         |        |       |         |       |
|---------------|--------------|--------------|----------------------------------------------|--------|-------|---------|---------|--------|-------|---------|-------|
| Hps5          | A_52_P669145 | NM_001005247 | Hermansky-Pudlak syndrome 5 homolog          | -1.232 | 53.87 | 0.54294 | 11107 P | -1.1   | 9.71  | 0.08012 | 2658  |
| M6prbp1       | A_51_P223404 | NM_025836    | mannose-6-phosphate receptor binding p       | -1.232 | 65.79 | 0.70274 | 18550 P | 1.048  | 28.13 | 0.43976 | 7919  |
| Ndn12         | A_52_P196721 | AK131157     | neccdin-like 2                               | -1.232 | 75.14 | 0.90003 | 30997 P | -1.08  | 22.1  | 0.14879 | 4025  |
| Oaz1          | A_51_P104128 | AK003452     | ornithine decarboxylase antizyme             | -1.232 | 45.92 | 0.49576 | 9474 P  | 1.065  | 16.2  | 0.19146 | 4762  |
| Pml           | A_51_P282799 | NM_008884    | promyelocytic leukemia                       | -1.232 | 65.79 | 0.7015  | 18469 P | 1.129  | 13.58 | 0.35082 | 6882  |
| Smyd4         | A_51_P460774 | NM_177009    | SET and MYND domain containing 4             | -1.232 | 53.87 | 0.56811 | 11991 P | -1.019 | 49.22 | 0.72777 | 10548 |
| 9430010003Rik | A_52_P423128 | NM_176849    | RIKEN cDNA 9430010003 gene                   | -1.233 | 57.76 | 0.68577 | 13406 M | 1.088  | 28.13 | 0.68881 | 10227 |
| Axin1         | A_52_P197007 | NM_009733    | axin 1                                       | -1.233 | 38.68 | 0.42411 | 7192 P  | 1.102  | 11.33 | 0.1484  | 4016  |
| Bak1          | A_51_P395011 | NM_007523    | BCL2-antagonist/killer 1                     | -1.233 | 42.28 | 0.44136 | 7673 P  | 1.084  | 11.33 | 0.11108 | 3298  |
| Dcbl1         | A_51_P483699 | NM_025705    | discoidin, CUB and LCCL domain containi      | -1.233 | 57.76 | 0.5944  | 13196 P | 1.037  | 28.13 | 0.42503 | 7777  |
| Ddah1         | A_51_P110471 | NM_026993    | dimethylarginine dimethylaminohydrolas       | -1.233 | 65.79 | 0.74736 | 20960 M | -1.018 | 49.48 | 0.74235 | 10707 |
| Nup210        | A_51_P420037 | NM_018815    | nucleoporin 210                              | -1.233 | 57.76 | 0.62384 | 14635 P | -1.057 | 38.4  | 0.34421 | 6813  |
| Pip5k2a       | A_52_P271468 | NM_008845    | phosphatidylinositol-4-phosphate 5-kinas     | -1.233 | 49.93 | 0.52519 | 10547 P | -1.032 | 46.3  | 0.60929 | 9517  |
| Qars          | A_52_P360756 | AK161817     | glutaminyl-tRNA synthetase                   | -1.233 | 49.93 | 0.72307 | 12512 A | 1.044  | 28.13 | 0.47086 | 8213  |
| Sec24c        | A_51_P186564 | NM_172596    | SEC24 related gene family, member C (S.      | -1.233 | 45.92 | 0.46953 | 8505 P  | -1.189 | 1.18  | 0.01816 | 770   |
| 2810485I05Rik | A_51_P104125 | NM_176836    | RIKEN cDNA 2810485I05 gene                   | -1.235 | 45.92 | 0.58539 | 10266 M | 1.012  | 42.43 | 0.80819 | 11259 |
| Atp8b2        | A_52_P591542 | XM_283873    | ATPase, class I, type 8B, member 2           | -1.235 | 49.93 | 0.53279 | 10819 P | -1.283 | 0.51  | 0.0067  | 201   |
| Foxc2         | A_51_P196444 | NM_013519    | forkhead box C2                              | -1.235 | 61.79 | 0.68412 | 17613 P | 1.094  | 11.33 | 0.12623 | 3638  |
| Ihpk1         | A_51_P103718 | NM_013785    | inositol hexaphosphate kinase 1              | -1.235 | 57.76 | 0.6045  | 13663 P | 1.05   | 25.31 | 0.41191 | 7634  |
| Ptpn12        | A_51_P447668 | NM_011203    | protein tyrosine phosphatase, non-recept     | -1.235 | 45.92 | 0.49127 | 9275 P  | -1.086 | 22.1  | 0.18898 | 4709  |
| Snrpa1        | A_51_P164270 | NM_021336    | small nuclear ribonucleoprotein polypept     | -1.235 | 61.79 | 0.69105 | 17969 P | -1.048 | 43.75 | 0.48398 | 8378  |
| Sp6           | A_52_P383577 | NM_031183    | trans-acting transcription factor 6          | -1.235 | 49.93 | 0.50667 | 9879 P  | -1.142 | 4.63  | 0.06279 | 2228  |
| Tbc1d2        | A_51_P454707 | AK041359     | TBC1 domain family, member 2                 | -1.235 | 45.92 | 0.80583 | 19872 A | 1.006  | 42.43 | 0.90792 | 12177 |
| 4921506J03Rik | A_51_P176783 | NM_001033474 | RIKEN cDNA 4921506J03 gene                   | -1.236 | 42.28 | 0.56518 | 9611 M  | 1.087  | 19.02 | 0.33333 | 6719  |
| Arid2         | A_52_P25008  | NM_175251    | AT rich interactive domain 2 (Arid-rfx like) | -1.236 | 35.45 | 0.39874 | 6481 P  | 1.127  | 9.71  | 0.12271 | 3557  |
| Dapk3         | A_51_P493285 | NM_007828    | death-associated kinase 3                    | -1.236 | 45.92 | 0.4623  | 8298 P  | -1.013 | 49.48 | 0.79039 | 11098 |
| Khdrbs1       | A_52_P199058 | NM_011317    | KH domain containing, RNA binding, signa     | -1.236 | 23.47 | 0.35282 | 5184 P  | 1.076  | 16.2  | 0.20625 | 4988  |
| Rtkn          | A_51_P234330 | NM_133641    | rhotekin                                     | -1.236 | 57.76 | 0.637   | 15574 P | 1.075  | 13.58 | 0.1612  | 4237  |
| Sntb1         | A_51_P144500 | NM_016667    | syntrophin, basic 1                          | -1.236 | 49.93 | 0.53474 | 10881 P | 1.174  | 8.32  | 0.16598 | 4315  |
| Spint1        | A_52_P509886 | NM_016907    | serine protease inhibitor, Kunitz type 1     | -1.236 | 38.68 | 0.42094 | 7077 P  | -1.058 | 40.63 | 0.3949  | 7460  |
| Agt           | A_51_P323712 | NM_007428    | angiotensinogen (serpin peptidase inhibi     | -1.238 | 69.29 | 0.76891 | 22154 P | -1.042 | 42.43 | 0.35034 | 6878  |
| BC027382      | A_52_P632691 | AK134496     | cDNA sequence BC027382                       | -1.238 | 49.93 | 0.51637 | 10194 P | 1.006  | 42.43 | 0.92659 | 12367 |
| Eed           | A_51_P238643 | NM_021876    | embryonic ectoderm development               | -1.238 | 57.76 | 0.62384 | 14643 P | -1.165 | 2.53  | 0.04335 | 1625  |
| Gstp1         | A_51_P374464 | NM_013541    | glutathione S-transferase, pi 1              | -1.238 | 42.28 | 0.45132 | 7964 P  | -1.204 | 4.63  | 0.15747 | 4173  |
| Msh3          | A_52_P491493 | XM_983328    | mutS homolog 3 (E. coli)                     | -1.238 | 45.92 | 0.54594 | 10787 M | 1.015  | 42.43 | 0.80573 | 11227 |
| Nfkbib        | A_51_P259459 | NM_010908    | nuclear factor of kappa light chain gene e   | -1.238 | 57.76 | 0.61828 | 14309 P | -1.014 | 49.48 | 0.7827  | 11025 |
| Ssbp4         | A_52_P563617 | NM_133772    | single stranded DNA binding protein 4        | -1.238 | 72.2  | 0.84917 | 27700 P | 1.061  | 19.02 | 0.22046 | 5215  |
| Tbc1d10a      | A_51_P222386 | NM_134023    | TBC1 domain family, member 10a               | -1.238 | 45.92 | 0.47956 | 8932 P  | 1.028  | 33.49 | 0.49593 | 8516  |
| Bms1l         | A_51_P278950 | NM_194339    | BMS1 homolog, ribosome assembly prote        | -1.239 | 72.2  | 0.83244 | 26249 P | 1.008  | 42.43 | 0.87351 | 11794 |
| Eif2ak3       | A_51_P253642 | NM_010121    | eukaryotic translation initiation factor 2 a | -1.239 | 53.87 | 0.58491 | 12766 P | -1.072 | 30.75 | 0.263   | 5849  |
| Luc7l2        | A_51_P361557 | NM_138680    | LUC7-like 2 (S. cerevisiae)                  | -1.239 | 53.87 | 0.6388  | 11836 M | 1.142  | 9.71  | 0.18425 | 4643  |
| Mpzi1         | A_51_P228295 | NM_001001880 | myelin protein zero-like 1                   | -1.239 | 49.93 | 0.52692 | 10600 P | 1.051  | 30.75 | 0.60845 | 9509  |
| Pcx           | A_51_P480578 | NM_008797    | pyruvate carboxylase                         | -1.239 | 65.79 | 0.73775 | 20555 P | -1.13  | 3.82  | 0.04979 | 1850  |
| 4930431B09Rik | A_51_P447976 | BC046309     | RIKEN cDNA 4930431B09 gene                   | -1.241 | 42.28 | 0.44185 | 7701 P  | -1.021 | 47.92 | 0.6382  | 9790  |
| Caskin2       | A_51_P354804 | NM_080643    | cask-interacting protein 2                   | -1.241 | 61.79 | 0.64847 | 16035 P | 1.056  | 19.02 | 0.26176 | 5840  |
| Gopc          | A_51_P427736 | NM_053187    | golgi associated PDZ and coiled-coil motif   | -1.241 | 49.93 | 0.50968 | 9921 P  | -1.025 | 47.43 | 0.63229 | 9741  |
| Unc119        | A_51_P201638 | NM_011676    | unc-119 homolog (C. elegans)                 | -1.241 | 31.88 | 0.37646 | 5784 P  | 1.013  | 40.63 | 0.76047 | 10862 |
| Elk3          | A_52_P627357 | NM_205536    | ELK3, member of ETS oncogene family          | -1.242 | 49.93 | 0.59355 | 10492 M | 1.054  | 25.31 | 0.40887 | 7598  |
| Gsr           | A_51_P359625 | NM_010344    | glutathione reductase 1                      | -1.242 | 65.79 | 0.75132 | 16117 M | 1.058  | 30.75 | 0.63515 | 9764  |
| Hmgb2         | A_52_P485417 | NM_008252    | high mobility group box 2                    | -1.242 | 65.79 | 0.75691 | 21479 P | -1.191 | 0.92  | 0.01372 | 578   |
| Myo9a         | A_52_P201531 | AK029836     | myosin IXa                                   | -1.242 | 42.28 | 0.44353 | 7762 P  | 1.123  | 6.98  | 0.06577 | 2309  |
| Pnpla2        | A_52_P681771 | NM_025802    | patatin-like phospholipase domain containi   | -1.242 | 38.68 | 0.41313 | 6854 P  | 1.11   | 8.32  | 0.06587 | 2311  |
| Rce1          | A_51_P108778 | NM_023131    | RCE1 homolog, prenyl protein peptidase       | -1.242 | 35.45 | 0.39447 | 6323 P  | 1.048  | 28.13 | 0.40275 | 7542  |

|               |              |              |                                               |        |       |         |         |        |       |         |       |
|---------------|--------------|--------------|-----------------------------------------------|--------|-------|---------|---------|--------|-------|---------|-------|
| Tff2          | A_51_P480602 | NM_009363    | trefoil factor 2 (spasmolytic protein 1)      | -1.242 | 61.79 | 0.77907 | 18667 M | -1.284 | 0.75  | 0.02005 | 862   |
| Zbtb10        | A_52_P325161 | XM_485202    | zinc finger and BTB domain containing 10      | -1.242 | 61.79 | 0.66137 | 16641 P | -1.387 | 0.51  | 0.00584 | 97    |
| 0610011L14Rik | A_52_P211208 | NM_026661    | RIKEN cDNA 0610011L14 gene                    | -1.244 |       | 0.61694 | 12744 A | -1.035 | 45.05 | 0.50922 | 8664  |
| 0610030E20Rik | A_52_P297457 | BC066053     | RIKEN cDNA 0610030E20 gene                    | -1.244 | 61.79 | 0.64753 | 15984 P | -1.248 | 0.51  | 0.00774 | 292   |
| 1810031K17Rik | A_52_P428228 | NM_026977    | RIKEN cDNA 1810031K17 gene                    | -1.244 | 57.76 | 0.61187 | 14030 P | -1.356 | 0.51  | 0.01251 | 524   |
| Cyp20a1       | A_51_P370470 | NM_030013    | cytochrome P450, family 20, subfamily A,      | -1.244 | 61.79 | 0.67883 | 17404 P | 1.074  | 11.33 | 0.12248 | 3553  |
| Dgcr8         | A_52_P150999 | AK044890     | DiGeorge syndrome critical region gene 8      | -1.244 | 65.79 | 0.72707 | 20059 P | 1.042  | 33.49 | 0.62775 | 9695  |
| Hmg20a        | A_52_P228389 | AK039222     | high mobility group 20A                       | -1.244 | 45.92 | 0.49059 | 9251 P  | 1.104  | 13.58 | 0.26884 | 5930  |
| Myh9          | A_51_P313711 | NM_022410    | myosin, heavy polypeptide 9, non-muscle       | -1.244 | 69.29 | 0.82279 | 19069 M | 1.037  | 30.75 | 0.47447 | 8259  |
| Peli1         | A_51_P208490 | AK040256     |                                               | -1.244 | 45.92 | 0.49512 | 9438 M  | 1.12   | 16.2  | 0.36911 | 7153  |
| Rock1         | A_52_P119672 | NM_009071    | Rho-associated coiled-coil containing pro     | -1.244 | 42.28 | 0.45319 | 8010 P  | -1.157 | 1.62  | 0.02609 | 1078  |
| Snf1k2        | A_52_P575296 | NM_178710    | SNF1-like kinase 2                            | -1.244 | 35.45 | 0.38395 | 6006 P  | 1.04   | 28.13 | 0.43432 | 7889  |
| Trpc4ap       | A_52_P427484 | NM_019828    | transient receptor potential cation chann     | -1.244 | 45.92 | 0.47092 | 8581 P  | 1.075  | 16.2  | 0.22119 | 5222  |
| AI837181      | A_51_P244923 | NM_134149    | expressed sequence AI837181                   | -1.245 | 49.93 | 0.51941 | 10332 P | -1.008 | 49.48 | 0.94108 | 12490 |
| Fbxo28        | A_51_P445392 | NM_175127    | F-box protein 28                              | -1.245 | 42.28 | 0.43739 | 7549 P  | -1.029 | 46.85 | 0.60412 | 9483  |
| Gspt1         | A_51_P440004 | NM_146066    | G1 to S phase transition 1                    | -1.245 | 42.28 | 0.45467 | 8044 P  | -1.353 | 0.51  | 0.00584 | 77    |
| Hes1          | A_51_P498093 | NM_008235    | hairy and enhancer of split 1 (Drosophila)    | -1.245 | 42.28 | 0.42844 | 7311 P  | 1.149  | 3.82  | 0.02989 | 1193  |
| Nr2c1         | A_52_P175116 | AK053907     | nuclear receptor subfamily 2, group C, me     | -1.245 | 53.87 | 0.48549 | 8344 M  | 1.078  | 13.58 | 0.17335 | 4432  |
| S100a10       | A_51_P342871 | NM_009112    | S100 calcium binding protein A10 (calpac      | -1.245 | 65.79 | 0.72159 | 19719 P | 1.002  | 42.43 | 0.98778 | 12965 |
| Syt13         | A_52_P253044 | NM_030725    | synaptotagmin XIII                            | -1.245 | 69.29 | 0.78582 | 17405 M | -1.323 | 0.51  | 0.00802 | 296   |
| Zfp87         | A_52_P188070 | AK019056     | zinc finger protein 87                        | -1.245 | 57.76 | 0.60643 | 13746 P | 1.1    | 11.33 | 0.15617 | 4152  |
| Zhx2          | A_51_P381230 | NM_199449    | zinc fingers and homeoboxes protein 2         | -1.245 | 49.93 | 0.53833 | 11004 P | -1.002 | 49.48 | 0.97426 | 12780 |
| Ppib          | A_51_P327828 | NM_011149    | peptidylprolyl isomerase B                    | -1.247 | 53.87 | 0.5734  | 12157 P | 1.038  | 30.75 | 0.5279  | 8819  |
| Zfp131        | A_51_P469288 | NM_028245    | zinc finger protein 131                       | -1.247 | 25.79 | 0.3484  | 5074 P  | 1.127  | 6.98  | 0.05437 | 1988  |
| 2010008E23Rik | A_52_P511431 | NM_028076    | RIKEN cDNA 2010008E23 gene                    | -1.248 | 49.93 | 0.50695 | 9882 P  | 1.058  | 19.02 | 0.26833 | 5929  |
| Eif3s7        | A_52_P425237 | AK158344     | eukaryotic translation initiation factor 3, s | -1.248 | 61.79 | 0.64239 | 15823 P | 1.182  | 3.82  | 0.03953 | 1499  |
| Mrpl43        | A_52_P374351 | NM_053164    | mitochondrial ribosomal protein L43           | -1.248 | 53.87 | 0.55509 | 11463 P | 1.007  | 42.43 | 0.92232 | 12287 |
| Sfpq          | A_52_P292528 | NM_023603    | splicing factor proline/glutamine rich (pol   | -1.248 | 53.87 | 0.57878 | 10732 M | 1.156  | 11.33 | 0.30392 | 6365  |
| 2610034B18Rik | A_52_P615010 | NM_027420    | RIKEN cDNA 2610034B18 gene                    | -1.25  | 49.93 | 0.53377 | 10856 P | -1.078 | 16.2  | 0.11418 | 3370  |
| Atf6          | A_52_P464346 | XM_888686    | activating transcription factor 6             | -1.25  | 53.87 | 0.54272 | 11095 P | 1.084  | 19.02 | 0.40873 | 7597  |
| Dnajb9        | A_52_P613358 | NM_013760    | Dnaj (Hsp40) homolog, subfamily B, mem        | -1.25  | 57.76 | 0.5944  | 13210 P | 1.103  | 13.58 | 0.21184 | 5071  |
| Hnrpa3        | A_51_P443482 | NM_146130    | heterogeneous nuclear ribonucleoprotein       | -1.25  | 23.47 | 0.48755 | 7510 M  | 1.165  | 6.98  | 0.12533 | 3611  |
| Mtmr1         | A_52_P240934 | NM_016985    | myotubularin related protein 1                | -1.25  |       | 0.82255 | 16504 A | 1.021  | 38.4  | 0.72173 | 10508 |
| Pdgfc         | A_52_P408629 | AK081347     | platelet-derived growth factor, C polypep     | -1.25  | 75.14 | 0.66736 | 13439 M | -1.022 | 48.7  | 0.70847 | 10395 |
| Cadps         | A_52_P121903 | NM_012061    | Ca<2+>-dependent activator protein for se     | -1.252 | 35.45 | 0.39281 | 6248 P  | -1.006 | 49.48 | 0.89755 | 12037 |
| Car9          | A_52_P610923 | NM_139305    | carbonic anhydrase 9                          | -1.252 | 75.14 | 0.93862 | 29401 M | 1.118  | 9.71  | 0.12388 | 3579  |
| Cflar         | A_51_P326091 | BC023121     | CASP8 and FADD-like apoptosis regulator       | -1.252 | 61.79 | 0.72992 | 15473 M | 1.115  | 8.32  | 0.08432 | 2760  |
| 2410002O22Rik | A_52_P311148 | AK012141     | RIKEN cDNA 2410002O22 gene                    | -1.253 | 38.68 | 0.42357 | 7149 P  | 1.011  | 42.43 | 0.84001 | 11529 |
| 5730589K01Rik | A_52_P276794 | NM_023434    | TOX high mobility group box family mem        | -1.253 | 53.87 | 0.54639 | 11275 P | -1.054 | 38.4  | 0.31208 | 6480  |
| BC039093      | A_52_P422557 | XM_131700    | cDNA sequence BC039093                        | -1.253 | 49.93 | 0.51278 | 10044 P | 1.124  | 8.32  | 0.07694 | 2574  |
| Ddx28         | A_51_P219325 | NM_028038    | DEAD (Asp-Glu-Ala-Asp) box polypeptide        | -1.253 | 42.28 | 0.43708 | 7545 P  | 1.026  | 38.4  | 0.70782 | 10389 |
| Nedd4l        | A_51_P305936 | NM_031881    | neural precursor cell expressed, develop      | -1.253 | 35.45 | 0.38794 | 6122 P  | 1.078  | 19.02 | 0.35987 | 7012  |
| Nrp2          | A_52_P93910  | NM_001077403 | neuropilin 2                                  | -1.253 | 49.93 | 0.53669 | 10931 P | 1.114  | 13.58 | 0.25926 | 5799  |
| Sfrs2ip       | A_51_P302507 | NM_028148    | splicing factor, arginine/serine-rich 2, inte | -1.253 | 38.68 | 0.42063 | 7036 P  | 1.146  | 4.63  | 0.03904 | 1463  |
| Zfp111        | A_52_P366443 | NM_019940    | zinc finger protein 111                       | -1.253 | 45.92 | 0.46319 | 8327 P  | 1.162  | 3.46  | 0.02801 | 1125  |
| Ap2a2         | A_52_P668488 | NM_007459    | adaptor protein complex AP-2, alpha 2 su      | -1.255 | 42.28 | 0.45145 | 7972 P  | -1.154 | 4.63  | 0.07828 | 2610  |
| Armet         | A_51_P418168 | NM_029103    | arginine-rich, mutated in early stage tum     | -1.255 | 53.87 | 0.54821 | 11350 P | 1.084  | 11.33 | 0.12566 | 3621  |
| Bmp7          | A_51_P492366 | NM_007557    | bone morphogenetic protein 7                  | -1.255 | 65.79 | 0.70134 | 17520 M | 1.045  | 25.31 | 0.34198 | 6793  |
| Dll3          | A_51_P504494 | NM_007866    | delta-like 3 (Drosophila)                     | -1.255 | 57.76 | 0.60503 | 13691 M | 1.084  | 9.71  | 0.09718 | 3043  |
| Dpagt1        | A_51_P422208 | NM_007875    | dolichyl-phosphate (UDP-N-acetylglucosa       | -1.255 | 35.45 | 0.38911 | 6159 P  | -1.31  | 0.51  | 0.00804 | 299   |
| Sfrs10        | A_52_P320822 | BC057996     | splicing factor, arginine/serine-rich 10 (tra | -1.255 | 49.93 | 0.51629 | 10181 P | -1.069 | 22.1  | 0.139   | 3822  |
| Whsc1         | A_51_P400498 | BC079668     | Wolf-Hirschhorn syndrome candidate 1 (H       | -1.255 | 49.93 | 0.53419 | 10863 P | -1.02  | 49.22 | 0.71731 | 10463 |
| 1110014L15Rik | A_52_P684066 | AK003710     | RIKEN cDNA 1110014L15 gene                    | -1.256 | 45.92 | 0.4921  | 9330 P  | 1.097  | 9.71  | 0.0808  | 2680  |



|               |              |              |                                            |        |       |         |         |        |       |         |       |
|---------------|--------------|--------------|--------------------------------------------|--------|-------|---------|---------|--------|-------|---------|-------|
| Bcl10         | A_52_P566867 | AK080820     | B-cell leukemia/lymphoma 10                | -1.256 | 49.93 | 0.4726  | 8321 M  | 1.056  | 28.13 | 0.57716 | 9241  |
| Cd276         | A_51_P499551 | NM_133983    | CD276 antigen                              | -1.256 | 31.88 | 0.35955 | 5390 P  | -1.279 | 0.66  | 0.01529 | 650   |
| Mllt1         | A_52_P227307 | NM_022328    | myeloid/lymphoid or mixed lineage-leuke    | -1.256 | 42.28 | 0.43099 | 7391 P  | 1.135  | 9.71  | 0.18329 | 4632  |
| Polr3e        | A_52_P231410 | AK029412     | polymerase (RNA) III (DNA directed) poly   | -1.256 | 53.87 | 0.5486  | 11375 P | -1.141 | 3.01  | 0.03904 | 1467  |
| Ptpn2         | A_52_P403484 | BC008269     | protein tyrosine phosphatase, non-recept   | -1.256 | 61.79 | 0.65713 | 16449 P | 1.067  | 16.2  | 0.197   | 4852  |
| Smpd2         | A_51_P234421 | NM_009213    | sphingomyelin phosphodiesterase 2, neu     | -1.256 | 45.92 | 0.49658 | 9487 P  | 1.059  | 16.2  | 0.20222 | 4935  |
| Suhw2         | A_51_P486068 | NM_177475    | suppressor of hairy wing homolog 2 (Dros   | -1.256 | 49.93 | 0.50948 | 9916 P  | 1.01   | 42.43 | 0.88445 | 11915 |
| Utx           | A_52_P346950 | AK080370     | ubiquitously transcribed tetratricopeptide | -1.256 | 61.79 | 0.64108 | 13255 M | 1.092  | 13.58 | 0.18565 | 4660  |
| Yy1           | A_52_P317874 | AK137406     | YY1 transcription factor                   | -1.256 | 49.93 | 0.53797 | 10988 P | -1.056 | 36.07 | 0.24396 | 5564  |
| 2900057K09Rik | A_52_P577729 | BC062943     | RIKEN cDNA 2900057K09 gene                 | -1.258 | 31.88 | 0.36739 | 5555 P  | 1.139  | 9.71  | 0.19654 | 4841  |
| 4833427B12Rik | A_52_P381303 | BC082565     | RIKEN cDNA 4833427B12 gene                 | -1.258 | 53.87 | 0.57612 | 12310 P | -1.003 | 49.48 | 0.96579 | 12708 |
| 2810423A18Rik | A_51_P270635 | AK013141     | RIKEN cDNA 2810423A18 gene                 | -1.259 | 28.61 | 0.34488 | 5006 P  | 1.038  | 30.75 | 0.4582  | 8079  |
| Cnot7         | A_52_P410732 | NM_011135    | CCR4-NOT transcription complex, subunit    | -1.259 | 42.28 | 0.44327 | 7752 P  | 1.019  | 38.4  | 0.67402 | 10089 |
| Copg          | A_52_P349694 | NM_201244    | coatamer protein complex, subunit gamm     | -1.259 | 53.87 | 0.57878 | 12431 P | -1.025 | 48.7  | 0.74243 | 10711 |
| Cyfp2         | A_52_P359745 | NM_133769    | cytoplasmic FMR1 interacting protein 2     | -1.259 | 61.79 | 0.72762 | 15370 M | -1.142 | 6.98  | 0.10735 | 3226  |
| Ifnar1        | A_51_P168545 | NM_010508    | interferon (alpha and beta) receptor 1     | -1.259 | 20.94 | 0.32122 | 4410 P  | 1.014  | 42.43 | 0.80001 | 11177 |
| Pitpnb        | A_52_P608318 | NM_019640    | phosphatidylinositol transfer protein, bet | -1.259 | 49.93 | 0.50367 | 9831 P  | 1.008  | 42.43 | 0.86004 | 11679 |
| Spint2        | A_51_P497350 | NM_011464    | serine protease inhibitor, Kunitz type 2   | -1.259 | 65.79 | 0.74239 | 15833 M | 1.073  | 36.07 | 0.81259 | 11308 |
| 5133401N09Rik | A_52_P335609 | NM_198004    | RIKEN cDNA 5133401N09 gene                 | -1.261 | 28.61 | 0.34273 | 4973 P  | -1.003 | 49.48 | 0.94643 | 12556 |
| Ppp1r2        | A_51_P221512 | NM_025800    | protein phosphatase 1, regulatory (inhibit | -1.261 | 49.93 | 0.5373  | 10947 P | 1.199  | 2.53  | 0.01663 | 713   |
| Rbm17         | A_51_P515496 | NM_152824    | RNA binding motif protein 17               | -1.261 | 28.61 | 0.34719 | 5051 P  | 1.086  | 11.33 | 0.09827 | 3071  |
| Sdf2l1        | A_51_P280446 | NM_022324    | stromal cell-derived factor 2-like 1       | -1.261 | 38.68 | 0.51629 | 8275 M  | -1.336 | 0.51  | 0.00623 | 136   |
| Wdr26         | A_52_P605296 | NM_097731    | WD repeat domain 26                        | -1.261 | 38.68 | 0.40616 | 6636 P  | 1.047  | 25.31 | 0.38151 | 7289  |
| 0610040J01Rik | A_51_P483617 | NM_029554    | RIKEN cDNA 0610040J01 gene                 | -1.263 | 72.2  | 0.83553 | 19853 M | 1.085  | 11.33 | 0.12552 | 3617  |
| 2310028O11Rik | A_51_P486639 | XM_901483    | RIKEN cDNA 2310028O11 gene                 | -1.263 | 38.68 | 0.41125 | 6798 P  | 1.062  | 19.02 | 0.23232 | 5384  |
| 2810441K11Rik | A_52_P619903 | NM_026798    | RIKEN cDNA 2810441K11 gene                 | -1.263 | 35.45 | 0.37219 | 5660 P  | 1.074  | 19.02 | 0.35474 | 6950  |
| Clstn1        | A_52_P448205 | BC053843     | calsynenin 1                               | -1.263 | 49.93 | 0.53335 | 10836 P | 1.061  | 22.1  | 0.30312 | 6356  |
| Ifitm2        | A_51_P168459 | NM_030694    | interferon induced transmembrane prote     | -1.263 | 35.45 | 0.38461 | 6023 P  | -1.089 | 36.07 | 0.45311 | 8025  |
| Lin28         | A_52_P294305 | NM_145833    | lin-28 homolog (C. elegans)                | -1.263 | 57.76 | 0.61205 | 14068 P | -1.025 | 47.43 | 0.64212 | 9820  |
| Slc25a20      | A_51_P344008 | NM_020520    | solute carrier family 25 (mitochondrial ca | -1.263 | 61.79 | 0.67249 | 17193 P | 1.137  | 9.71  | 0.18229 | 4613  |
| Tnfrsf1       | A_52_P52036  | NM_009395    | tumor necrosis factor, alpha-induced prot  | -1.263 | 20.94 | 0.31692 | 4287 P  | 1.142  | 6.98  | 0.06454 | 2269  |
| Strn4         | A_51_P234833 | NM_133789    | striatin, calmodulin binding protein 4     | -1.264 | 53.87 | 0.58125 | 12605 P | -1.031 | 47.92 | 0.74287 | 10714 |
| Xpnp1         | A_51_P448427 | NM_133216    | X-prolyl aminopeptidase (aminopeptidase    | -1.264 | 31.88 | 0.35096 | 5132 P  | 1.074  | 13.58 | 0.14949 | 4033  |
| 2600011C06Rik | A_52_P259425 | BC010792     | RNA binding motif protein 25               | -1.266 | 57.76 | 0.63941 | 15663 P | -1.039 | 46.3  | 0.66025 | 9975  |
| Phc2          | A_51_P457388 | NM_018774    | polyhomeotic-like 2 (Drosophila)           | -1.266 | 31.88 | 0.35584 | 5255 P  | 1.097  | 13.58 | 0.17832 | 4542  |
| Adcy6         | A_51_P243134 | NM_007405    | adenylate cyclase 6                        | -1.267 | 38.68 | 0.41329 | 6859 P  | 1.085  | 11.33 | 0.13679 | 3788  |
| Man2b1        | A_52_P322573 | AK054315     | mannosidase 2, alpha B1                    | -1.267 | 69.29 | 0.68443 | 16818 P | -1.126 | 3.82  | 0.04505 | 1688  |
| Ppp1r3c       | A_52_P30451  | NM_016854    | protein phosphatase 1, regulatory (inhibit | -1.267 | 53.87 | 0.58125 | 12577 P | 1.064  | 19.02 | 0.23847 | 5464  |
| Satb2         | A_52_P536927 | AK129270     | special AT-rich sequence binding protein 2 | -1.267 | 65.79 | 0.73114 | 20323 P | 1.083  | 11.33 | 0.12367 | 3572  |
| Esco2         | A_51_P195034 | NM_028039    | establishment of cohesion 1 homolog 2 (S   | -1.269 | 72.2  | 0.85746 | 28098 P | -1.194 | 1.32  | 0.0537  | 1754  |
| Gmeb2         | A_51_P101228 | NM_198169    | glucocorticoid modulatory element bindin   | -1.269 | 31.88 | 0.34902 | 5099 P  | -1.047 | 42.43 | 0.34534 | 6820  |
| Herpud1       | A_51_P434101 | NM_022331    | homocysteine-inducible, endoplasmic ret    | -1.269 | 28.61 | 0.3596  | 5196 P  | -1.121 | 19.02 | 0.23748 | 5452  |
| Mnat1         | A_52_P190942 | AK053621     | menage a trois 1                           | -1.269 |       | 0.79718 | 15597 A | 1.046  | 30.75 | 0.51573 | 8728  |
| Ncoa4         | A_51_P151983 | NM_001033988 | nuclear receptor coactivator 4             | -1.271 | 57.76 | 0.64215 | 15803 P | 1.192  | 5.75  | 0.09121 | 2928  |
| Ndufs2        | A_51_P393761 | NM_153064    | NADH dehydrogenase (ubiquinone) Fe-S       | -1.271 | 61.79 | 0.65256 | 16217 P | -1.66  | 0.51  | 0.0146  | 622   |
| Nup98         | A_52_P170761 | NM_022979    | nucleoporin 98                             | -1.271 | 65.79 | 0.73698 | 20521 P | 1.02   | 38.4  | 0.69683 | 10288 |
| Polk          | A_51_P363588 | NM_012048    | polymerase (DNA directed), kappa           | -1.271 | 38.68 | 0.42029 | 7032 P  | 1.027  | 30.75 | 0.49768 | 8554  |
| Spnb1         | A_52_P490012 | S66283       | spectrin beta 1                            | -1.271 | 28.61 | 0.44123 | 6699 M  | 1.073  | 13.58 | 0.16133 | 4242  |
| Surf6         | A_52_P283119 | AK164904     | surfeit gene 6                             | -1.271 | 53.87 | 0.55923 | 11715 P | -1.069 | 28.13 | 0.19731 | 4859  |
| Tinag         | A_51_P283004 | NM_012033    | tubulointerstitial nephritis antigen       | -1.271 | 61.79 | 0.70294 | 18554 P | -1.027 | 46.3  | 0.54635 | 8994  |
| Ubqln4        | A_51_P362161 | NM_033526    | ubiquilin 4                                | -1.271 | 38.68 | 0.41046 | 6753 P  | 1.033  | 36.07 | 0.66434 | 9998  |
| 4930579K19Rik | A_51_P306739 | NM_175227    | RIKEN cDNA 4930579K19 gene                 | -1.272 | 25.79 | 0.32081 | 4392 P  | 1.013  | 42.43 | 0.83006 | 11452 |
| Dtnb          | A_52_P136751 | NM_007886    | dystrobrevin, beta                         | -1.272 | 57.76 | 0.60523 | 13702 P | 1.009  | 42.43 | 0.87436 | 11802 |

|               |               |              |                                               |        |       |         |         |        |       |         |       |
|---------------|---------------|--------------|-----------------------------------------------|--------|-------|---------|---------|--------|-------|---------|-------|
| Rbmx          | A_51_P277270  | NM_011252    | RNA binding motif protein, X chromosome       | -1.272 | 35.45 | 0.37022 | 5633 P  | 1.009  | 42.43 | 0.85658 | 11640 |
| Rybp          | A_51_P279505  | NM_019743    | RING1 and YY1 binding protein                 | -1.272 | 61.79 | 0.70236 | 18521 P | 1.094  | 11.33 | 0.14618 | 3966  |
| Sf3b3         | A_51_P113747  | AK017529     | splicing factor 3b, subunit 3                 | -1.272 | 35.45 | 0.37747 | 5845 P  | -1.109 | 8.32  | 0.07214 | 2442  |
| Slc12a7       | A_51_P421734  | NM_011390    | solute carrier family 12, member 7            | -1.272 | 61.79 | 0.67305 | 17211 P | 1.035  | 30.75 | 0.43881 | 7913  |
| O610011F06Rik | A_51_P443618  | NM_026686    | RIKEN cDNA O610011F06 gene                    | -1.274 | 45.92 | 0.49273 | 9353 P  | 1.153  | 3.82  | 0.03594 | 1386  |
| C030034I22Rik | A_52_P778544  | AK147961     | RIKEN cDNA C030034I22 gene                    | -1.274 | 57.76 | 0.62287 | 14573 P | -1.134 | 4.63  | 0.06577 | 2310  |
| Ckap2         | A_52_P162099  | NM_001004140 | cytoskeleton associated protein 2             | -1.274 | 65.79 | 0.73001 | 20243 M | 1.096  | 11.33 | 0.15354 | 4106  |
| Eif3s1        | A_52_P654965  | BC080788     | eukaryotic translation initiation factor 3, s | -1.274 | 49.93 | 0.52791 | 10647 P | 1.048  | 25.31 | 0.31429 | 6518  |
| Ppapdc1       | A_51_P281593  | AK144593     | phosphatidic acid phosphatase type 2 do       | -1.274 | 25.79 | 0.32338 | 4447 P  | -1.107 | 16.2  | 0.18061 | 4586  |
| Scml4         | A_51_P338799  | NM_172938    | sex comb on midleg-like 4 (Drosophila)        | -1.274 | 53.87 | 0.57307 | 12145 P | 1.051  | 25.31 | 0.35417 | 6939  |
| Z600014M03Rik | A_52_P65703   | NM_178620    | major facilitator superfamily domain cont     | -1.276 | 38.68 | 0.41016 | 6738 P  | 1.067  | 25.31 | 0.53859 | 8924  |
| Chaf1a        | A_51_P196973  | NM_013733    | chromatin assembly factor 1, subunit A (p     | -1.276 | 53.87 | 0.54899 | 11388 P | 1.028  | 33.49 | 0.57292 | 9210  |
| CommD7        | A_52_P646705  | NM_133850    | COMM domain containing 7                      | -1.276 | 25.79 | 0.32851 | 4612 P  | 1.124  | 6.98  | 0.05931 | 2129  |
| Hoxd8         | A_52_P485542  | NM_008276    | homeo box D8                                  | -1.276 | 69.29 | 0.78992 | 23435 P | 1.001  | 42.43 | 0.99571 | 13014 |
| Kit           | A_51_P355906  | NM_021099    | kit oncogene                                  | -1.276 | 65.79 | 0.72231 | 19783 P | -1.044 | 46.3  | 0.68259 | 10162 |
| Mkln1         | A_52_P459538  | AK037967     | muskelin 1, intracellular mediator contain    | -1.276 | 53.87 | 0.5746  | 12223 P | 1.103  | 13.58 | 0.24554 | 5576  |
| Mras          | A_52_P256929  | NM_008624    | muscle and microspikes RAS                    | -1.276 | 45.92 | 0.49852 | 9616 P  | 1.083  | 11.33 | 0.11656 | 3409  |
| Saa2          | A_51_P166886  | NM_011314    | serum amyloid A 2                             | -1.276 | 53.87 | 0.54327 | 10172 M | -1.024 | 47.43 | 0.59766 | 9430  |
| Tmem27        | A_51_P248595  | NM_020626    | transmembrane protein 27                      | -1.276 | 57.76 | 0.67557 | 13048 M | 1.115  | 16.2  | 0.67829 | 7315  |
| Cdc14b        | A_51_P416660  | NM_172587    | CDC14 cell division cycle 14 homolog B (S     | -1.277 | 45.92 | 0.47131 | 8614 P  | 1.028  | 36.07 | 0.68236 | 10159 |
| Cks1b         | A_51_P227004  | NM_016904    | CDC28 protein kinase 1b                       | -1.277 | 35.45 | 0.49773 | 7787 M  | 1.111  | 13.58 | 0.2948  | 6274  |
| Junb          | A_51_P159201  | NM_008416    | Jun-B oncogene                                | -1.277 | 45.92 | 0.55722 | 9410 M  | 1.146  | 8.32  | 0.11713 | 3422  |
| Kin           | A_52_P455275  | NM_025280    | antigenic determinant of rec-A protein        | -1.277 | 53.87 | 0.59546 | 13260 P | 1.071  | 13.58 | 0.14782 | 3996  |
| Phldb2        | A_52_P153700  | NM_153412    | pleckstrin homology-like domain, family E     | -1.277 | 25.79 | 0.32383 | 4476 P  | -1.006 | 49.48 | 0.92077 | 12278 |
| Arhgef19      | A_51_P442759  | NM_172520    | Rho guanine nucleotide exchange factor (      | -1.279 | 35.45 | 0.38565 | 6058 P  | 1.038  | 33.49 | 0.59528 | 9400  |
| Arl6ip2       | A_51_P163834  | NM_019717    | ADP-ribosylation factor-like 6 interacting p  | -1.279 | 61.79 | 0.71119 | 19027 P | 1.056  | 22.1  | 0.34708 | 6838  |
| Csnk2a1       | A_51_P397768  | NM_007788    | casein kinase 2, alpha 1 polypeptide          | -1.279 | 23.47 | 0.30778 | 4107 P  | 1.057  | 19.02 | 0.22271 | 5251  |
| Ctdsp1        | A_51_P222071  | NM_153088    | CTD (carboxy-terminal domain, RNA poly        | -1.279 | 42.28 | 0.46206 | 8277 P  | -1.106 | 38.4  | 0.56089 | 9117  |
| Hnrpr         | A_52_P451268  | AK042968     | heterogeneous nuclear ribonucleoprotein       | -1.279 | 61.79 | 0.65889 | 16541 P | 1.074  | 13.58 | 0.12691 | 3644  |
| Mark3         | A_52_P344704  | NM_022801    | MAP/microtubule affinity-regulating kina      | -1.279 | 31.88 | 0.34533 | 5016 P  | -1.031 | 45.68 | 0.52295 | 8779  |
| Slc6a6        | A_52_P339996  | NM_009320    | solute carrier family 6 (neurotransmitter t   | -1.279 | 57.76 | 0.65107 | 12209 M | -1.016 | 49.48 | 0.87436 | 11801 |
| Eif2b2        | A_51_P229816  | NM_145445    | eukaryotic translation initiation factor 2B,  | -1.28  | 42.28 | 0.4306  | 7373 P  | 1.019  | 40.63 | 0.72829 | 10552 |
| Fcho2         | A_52_P333921  | BC053718     | FCH domain only 2                             | -1.28  | 42.28 | 0.45734 | 8109 P  | 1.077  | 16.2  | 0.26536 | 5883  |
| Lrmp          | A_51_P130079  | NM_008511    | lymphoid-restricted membrane protein          | -1.28  | 61.79 | 0.66674 | 16897 P | -1.077 | 40.63 | 0.48187 | 8329  |
| Pogz          | A_51_P513449  | NM_172683    | pogo transposable element with ZNF don        | -1.28  | 45.92 | 0.55958 | 9482 M  | -1.098 | 25.31 | 0.25635 | 5749  |
| Rpo1-3        | A_52_P1083868 | AK037475     |                                               | -1.28  | 42.28 | 0.43833 | 7581 P  | -1.176 | 1.32  | 0.02221 | 938   |
| Tfec          | A_52_P127925  | NM_031198    | transcription factor EC                       | -1.28  | 45.92 | 0.49455 | 9411 P  | -1.07  | 25.31 | 0.17475 | 4472  |
| Tnrc6a        | A_51_P509229  | NM_144925    | trinucleotide repeat containing 6a            | -1.28  | 25.79 | 0.32102 | 4398 P  | 1.125  | 16.2  | 0.40523 | 7568  |
| Fgl1          | A_52_P294510  | NM_145594    | fibrinogen-like protein 1                     | -1.282 | 45.92 | 0.51941 | 9899 P  | 1.067  | 19.02 | 0.26583 | 5891  |
| Ica1          | A_52_P260339  | NM_010492    | islet cell autoantigen 1                      | -1.282 | 49.93 | 0.50317 | 9808 P  | -1.21  | 1.1   | 0.01711 | 740   |
| Nktr          | A_51_P246387  | NM_010918    | natural killer tumor recognition sequence     | -1.282 | 38.68 | 0.39874 | 6480 P  | 1.196  | 6.98  | 0.17372 | 4440  |
| Pcsk7         | A_51_P351285  | NM_008794    | proprotein convertase subtilisin/kexin typ    | -1.282 | 42.28 | 0.45055 | 7915 P  | 1.02   | 38.4  | 0.6993  | 10308 |
| Ar            | A_51_P496031  | NM_013476    | androgen receptor                             | -1.284 | 38.68 | 0.39347 | 6266 M  | -1.075 | 40.63 | 0.52383 | 8785  |
| Insm1         | A_51_P140887  | NM_016889    | insulinoma-associated 1                       | -1.284 | 49.93 | 0.53335 | 10832 P | -1.13  | 13.58 | 0.20155 | 4921  |
| Rabep2        | A_51_P484959  | NM_030566    | rabaptin, RAB GTPase binding effector pr      | -1.284 | 69.29 | 0.7823  | 22879 P | -1.024 | 48.39 | 0.68496 | 10190 |
| Sox7          | A_51_P476018  | NM_011446    | SRY-box containing gene 7                     | -1.284 | 42.28 | 0.44372 | 7763 P  | 1.036  | 33.49 | 0.61566 | 9584  |
| Srrm2         | A_51_P166277  | NM_175229    | serine/arginine repetitive matrix 2           | -1.284 | 45.92 | 0.57591 | 9900 M  | 1.025  | 42.43 | 0.89068 | 11971 |
| 4930402E16Rik | A_52_P411025  | NM_198308    | RIKEN cDNA 4930402E16 gene                    | -1.285 | 57.76 | 0.58493 | 12170 M | -1.078 | 28.13 | 0.23972 | 5481  |
| 6030446N20Rik | A_52_P988136  | AK037547     | RIKEN cDNA 6030446N20 gene                    | -1.285 | 61.79 | 0.70894 | 18882 M | 1.075  | 16.2  | 0.24158 | 5524  |
| Gsta4         | A_51_P112223  | NM_010357    | glutathione S-transferase, alpha 4            | -1.285 | 81.02 | 0.94819 | 30087 P | -1.069 | 36.07 | 0.36189 | 7039  |
| Tmprss6       | A_51_P219266  | NM_027902    | transmembrane serine protease 6               | -1.285 | 45.92 | 0.47426 | 8758 P  | -1.097 | 22.1  | 0.19871 | 4880  |
| Maged1        | A_51_P174854  | NM_019791    | melanoma antigen, family D, 1                 | -1.287 | 28.61 | 0.46688 | 6939 M  | 1.04   | 28.13 | 0.37012 | 7168  |
| Mrpl27        | A_52_P180692  | AK080324     | mitochondrial ribosomal protein L27           | -1.287 | 65.79 | 0.75046 | 21111 P | 1.063  | 22.1  | 0.39745 | 7494  |

|               |              |              |                                                                        |        |       |         |         |        |       |         |       |
|---------------|--------------|--------------|------------------------------------------------------------------------|--------|-------|---------|---------|--------|-------|---------|-------|
| Slc25a28      | A_52_P295533 | NM_145156    | solute carrier family 25, member 28                                    | -1.287 | 35.45 | 0.38796 | 6132 P  | -1.235 | 0.66  | 0.01251 | 519   |
| Arhgdib       | A_52_P515247 | NM_007486    | Rho, GDP dissociation inhibitor (GDI) beta                             | -1.289 | 72.2  | 0.84055 | 27121 P | -1.179 | 2.53  | 0.05247 | 1934  |
| Gpsm3         | A_51_P106322 | NM_134116    | G-protein signalling modulator 3 (AGS3-like)                           | -1.289 | 45.92 | 0.4813  | 8981 P  | -1.008 | 49.48 | 0.90099 | 12099 |
| Rela          | A_51_P385993 | NM_009045    | v-rel reticuloendotheliosis viral oncogene                             | -1.289 | 42.28 | 0.44218 | 7716 P  | 1.08   | 13.58 | 0.15136 | 4057  |
| Stat3         | A_51_P201480 | NM_213659    | signal transducer and activator of transcription 3                     | -1.289 | 53.87 | 0.61088 | 13267 P | 1.114  | 13.58 | 0.28389 | 6132  |
| Taf13         | A_51_P120608 | NM_025444    | TAF13 RNA polymerase II, TATA box binding protein associated factor 13 | -1.289 | 38.68 | 0.4035  | 6575 P  | 1.018  | 40.63 | 0.71909 | 10480 |
| 4933425L03Rik | A_52_P80567  | BC057020     | RIKEN cDNA 4933425L03 gene                                             | -1.29  | 35.45 | 0.37646 | 5779 P  | -1.056 | 42.43 | 0.46231 | 8135  |
| Impa2         | A_51_P299287 | NM_053261    | inositol (myo)-1(or 4)-monophosphatase                                 | -1.29  | 53.87 | 0.59861 | 13381 P | 1.048  | 28.13 | 0.4157  | 7684  |
| Papola        | A_52_P404096 | NM_011112    | poly (A) polymerase alpha                                              | -1.29  | 25.79 | 0.31874 | 4354 P  | 1.067  | 19.02 | 0.27384 | 6009  |
| Slc35e3       | A_51_P459402 | NM_029875    | solute carrier family 35, member E3                                    | -1.29  | 45.92 | 0.48379 | 9040 P  | -1.046 | 45.05 | 0.60318 | 9479  |
| Vcp           | A_51_P109766 | NM_009503    | valosin containing protein                                             | -1.29  | 53.87 | 0.5012  | 8402 M  | 1.104  | 8.32  | 0.05956 | 2135  |
| Zfp422        | A_52_P206762 | NM_026057    | zinc finger protein 422                                                | -1.29  | 38.68 | 0.50777 | 8058 M  | -1.035 | 45.68 | 0.54625 | 8991  |
| Dmwd          | A_51_P483946 | NM_010058    | dystrophia myotonica-containing WD repeat domain protein               | -1.292 | 49.93 | 0.54639 | 11274 P | -1.097 | 25.31 | 0.27795 | 6061  |
| Gfi1          | A_51_P200262 | NM_010278    | growth factor independent 1                                            | -1.292 | 42.28 | 0.5306  | 9408 P  | -1.075 | 36.07 | 0.39678 | 7489  |
| H3f3a         | A_51_P456237 | NM_008210    | H3 histone, family 3A                                                  | -1.292 | 69.29 | 0.7948  | 17804 M | 1.221  | 3.46  | 0.05486 | 2002  |
| Nfkbia        | A_51_P295192 | NM_010907    | nuclear factor of kappa light chain gene epsilon                       | -1.292 | 53.87 | 0.55224 | 11500 P | 1.245  | 6.98  | 0.18901 | 4710  |
| Sfn           | A_51_P213940 | NM_018754    | stratifin                                                              | -1.292 | 72.2  | 0.83127 | 26128 P | 1.015  | 40.63 | 0.76694 | 10913 |
| Dll4          | A_51_P384402 | NM_019454    | delta-like 4 (Drosophila)                                              | -1.294 | 31.88 | 0.34633 | 5035 P  | 1.042  | 28.13 | 0.4138  | 7666  |
| Mrps2         | A_52_P405955 | NM_080452    | mitochondrial ribosomal protein S2                                     | -1.294 | 20.94 | 0.28987 | 3619 P  | 1.064  | 22.1  | 0.35998 | 7018  |
| Pah           | A_51_P186547 | NM_008777    | phenylalanine hydroxylase                                              | -1.294 | 69.29 | 0.80717 | 24534 P | 1.131  | 16.2  | 0.42726 | 7789  |
| Slc22a1       | A_52_P229972 | NM_009202    | solute carrier family 22 (organic cation transporter)                  | -1.294 | 75.14 | 0.86026 | 26680 P | -1.041 | 45.05 | 0.53866 | 8929  |
| Stard10       | A_51_P191520 | NM_019990    | START domain containing 10                                             | -1.294 | 18.5  | 0.2835  | 3497 P  | -1.048 | 43.75 | 0.52383 | 8786  |
| Wfs1          | A_51_P216593 | NM_011716    | Wolfram syndrome 1 homolog (human)                                     | -1.294 | 45.92 | 0.57311 | 9825 M  | 1.116  | 8.32  | 0.08802 | 2839  |
| Apaf1         | A_51_P368696 | NM_001042558 | apoptotic peptidase activating factor 1                                | -1.295 | 42.28 | 0.44996 | 7906 P  | 1.017  | 40.63 | 0.70431 | 10349 |
| D030016E14Rik | A_52_P514336 | NM_177240    | RIKEN cDNA D030016E14 gene                                             | -1.295 | 49.93 | 0.54468 | 11192 P | 1.045  | 28.13 | 0.46999 | 8199  |
| Sfrs4         | A_52_P550780 | NM_020587    | splicing factor, arginine/serine-rich 4 (SRP)                          | -1.295 | 25.79 | 0.31283 | 4211 P  | -1.014 | 49.48 | 0.74779 | 10770 |
| Stxbp4        | A_51_P502957 | NM_011505    | syntaxin binding protein 4                                             | -1.295 | 28.61 | 0.32293 | 4438 P  | 1.074  | 19.02 | 0.35082 | 6883  |
| Trib1         | A_52_P573552 | NM_144549    | tribbles homolog 1 (Drosophila)                                        | -1.295 | 45.92 | 0.4726  | 8668 P  | -1.084 | 22.1  | 0.1534  | 4098  |
| 4732495E13Rik | A_51_P224771 | NM_172608    | RIKEN cDNA 4732495E13 gene                                             | -1.297 | 53.87 | 0.61502 | 11116 M | 1.162  | 3.82  | 0.03553 | 1379  |
| Ap4e1         | A_51_P484477 | XM_894489    | adaptor-related protein complex AP-4, epsilon                          | -1.297 | 61.79 | 0.68969 | 17903 P | 1.072  | 19.02 | 0.29787 | 6298  |
| F730014I05Rik | A_52_P285124 | AK041830     | RIKEN cDNA F730014I05 gene                                             | -1.297 | 45.92 | 0.50238 | 9728 P  | -1.142 | 3.01  | 0.04095 | 1554  |
| Oxr1          | A_51_P161893 | NM_130885    | oxidation resistance 1                                                 | -1.297 | 28.61 | 0.32228 | 4430 P  | -1.236 | 2.04  | 0.07846 | 2613  |
| Tirap         | A_52_P676956 | NM_054096    | toll-interleukin 1 receptor (TIR) domain-containing protein 1          | -1.297 | 53.87 | 0.5702  | 12063 P | 1.163  | 3.46  | 0.02717 | 1105  |
| Brwd3         | A_52_P8409   | AK083676     | bromodomain and WD repeat domain containing protein 3                  | -1.299 | 28.61 | 0.48069 | 7834 M  | 1.022  | 36.07 | 0.62027 | 9624  |
| Mospd3        | A_51_P492228 | NM_030037    | motile sperm domain containing 3                                       | -1.299 | 28.61 | 0.3333  | 4750 P  | 1.01   | 42.43 | 0.87549 | 11814 |
| Nxt1          | A_52_P184398 | NM_019761    | NTF2-related export protein 1                                          | -1.299 | 42.28 | 0.45371 | 8026 P  | -1.028 | 47.43 | 0.64576 | 9854  |
| Sh3bp1        | A_51_P342906 | NM_009164    | SH3-domain binding protein 1                                           | -1.299 | 53.87 | 0.58125 | 12555 P | -1.004 | 49.48 | 0.96884 | 12732 |
| VeZF1         | A_52_P45708  | NM_016686    | vascular endothelial zinc finger 1                                     | -1.299 | 38.68 | 0.41313 | 6853 P  | 1.04   | 33.49 | 0.63726 | 9779  |
| Zbtb24        | A_52_P302108 | NM_153398    | zinc finger and BTB domain containing 24                               | -1.299 | 49.93 | 0.53141 | 10780 P | 1.042  | 30.75 | 0.59114 | 9339  |
| 4921537D05Rik | A_51_P366211 | AK141627     | RIKEN cDNA 4921537D05 gene                                             | -1.3   | 57.76 | 0.61423 | 14138 P | -1.017 | 49.48 | 0.74126 | 10696 |
| Cpe           | A_52_P78417  | NM_013494    | carboxypeptidase E                                                     | -1.3   | 28.61 | 0.45133 | 6586 M  | 1.339  | 0.24  | 0.00619 | 125   |
| Lepre1        | A_51_P346923 | NM_019782    | leprecan 1                                                             | -1.3   | 35.45 | 0.37401 | 5712 M  | -1.021 | 49    | 0.71153 | 10416 |
| Nfkbiz        | A_51_P387591 | NM_030612    | nuclear factor of kappa light polypeptide                              | -1.3   | 57.76 | 0.65402 | 16305 P | -1.146 | 19.02 | 0.30984 | 6444  |
| Pim2          | A_51_P458428 | NM_138606    | proviral integration site 2                                            | -1.3   | 49.93 | 0.52944 | 10709 P | -1.087 | 25.31 | 0.19537 | 4420  |
| Rnf40         | A_51_P236013 | NM_172281    | ring finger protein 40                                                 | -1.3   | 57.76 | 0.65596 | 12395 M | 1.116  | 6.98  | 0.05437 | 1987  |
| Rpa1          | A_51_P333159 | NM_026653    | replication protein A1                                                 | -1.3   | 25.79 | 0.3077  | 4093 P  | -1.157 | 1.58  | 0.02161 | 908   |
| Wdr40a        | A_52_P274504 | AK083369     | WD repeat domain 40A                                                   | -1.3   | 42.28 | 0.43048 | 7359 P  | 1.036  | 30.75 | 0.43181 | 7857  |
| 9130229H14Rik | A_52_P637034 | BC125472     | melanoma inhibitory activity 3                                         | -1.302 | 23.47 | 0.2978  | 3765 P  | -1.102 | 22.1  | 0.25309 | 5698  |
| Arrdc1        | A_52_P188018 | NM_178408    | arrestin domain containing 1                                           | -1.302 | 28.61 | 0.33104 | 4684 P  | -1.069 | 25.31 | 0.17171 | 4404  |
| Faah          | A_51_P386660 | NM_010173    | fatty acid amide hydrolase                                             | -1.302 | 31.88 | 0.33699 | 4833 P  | 1.045  | 28.13 | 0.40641 | 7581  |
| Gsto1         | A_51_P155313 | NM_010362    | glutathione S-transferase omega 1                                      | -1.302 | 72.2  | 0.83826 | 27007 P | 1.206  | 2.53  | 0.02026 | 865   |
| Slc25a14      | A_52_P478281 | AK051145     | solute carrier family 25 (mitochondrial carrier)                       | -1.302 | 42.28 | 0.46206 | 6900 A  | 1.125  | 16.2  | 0.38049 | 7281  |
| Tmem16f       | A_52_P660158 | NM_175344    | transmembrane protein 16F                                              | -1.302 | 42.28 | 0.43969 | 7618 P  | 1.096  | 13.58 | 0.23137 | 5371  |

|               |              |              |                                             |        |       |         |         |        |       |         |       |
|---------------|--------------|--------------|---------------------------------------------|--------|-------|---------|---------|--------|-------|---------|-------|
| 2010005J08Rik | A_52_P199299 | NM_001077661 | RIKEN cDNA 2010005J08 gene                  | -1.304 | 42.28 | 0.44256 | 7736 P  | 1.06   | 22.1  | 0.30091 | 6337  |
| Capn2         | A_51_P448109 | NM_009794    | calpain 2                                   | -1.304 | 18.5  | 0.27224 | 3227 P  | 1.066  | 22.1  | 0.39272 | 7431  |
| Fbxo45        | A_51_P447299 | NM_173439    | F-box protein 45                            | -1.304 | 75.14 | 0.90389 | 31368 M | 1.071  | 19.02 | 0.29102 | 6220  |
| Gal           | A_51_P258281 | NM_010253    | galanin                                     | -1.304 | 49.93 | 0.52006 | 10351 P | 1.001  | 42.43 | 0.98302 | 12889 |
| Glg1          | A_52_P279759 | AK050772     | golgi apparatus protein 1                   | -1.304 | 31.88 | 0.33591 | 4803 P  | 1.071  | 13.58 | 0.13757 | 3801  |
| Pmm2          | A_52_P36306  | NM_016881    | phosphomannomutase 2                        | -1.304 | 38.68 | 0.41089 | 6768 P  | 1.098  | 11.33 | 0.13274 | 3727  |
| Tpst2         | A_51_P222153 | NM_009419    | protein-tyrosine sulfotransferase 2         | -1.304 | 57.76 | 0.6711  | 12914 M | -1.054 | 40.63 | 0.33097 | 6684  |
| Ctcf          | A_51_P513785 | NM_007794    | CCCTC-binding factor                        | -1.305 | 28.61 | 0.32    | 4378 P  | 1.091  | 16.2  | 0.29951 | 6310  |
| Glicc1        | A_52_P370935 | NM_178072    | glucocorticoid induced transcript 1         | -1.305 | 20.94 | 0.28084 | 3457 P  | 1.076  | 11.33 | 0.11836 | 3446  |
| Guk1          | A_51_P235878 | NM_008193    | guanylate kinase 1                          | -1.305 | 49.93 | 0.51541 | 10137 P | -1.034 | 45.05 | 0.47127 | 8219  |
| Plcb3         | A_51_P236042 | NM_008874    | phospholipase C, beta 3                     | -1.305 | 49.93 | 0.5083  | 9902 P  | 1.006  | 42.43 | 0.92493 | 12339 |
| Sdc4          | A_51_P323248 | NM_011521    | syndecan 4                                  | -1.305 | 35.45 | 0.4719  | 7091 M  | 1.073  | 13.58 | 0.15329 | 4093  |
| 1110067D22Rik | A_51_P440047 | NM_173752    | RIKEN cDNA 1110067D22 gene                  | -1.307 | 45.92 | 0.49479 | 9422 P  | 1.087  | 11.33 | 0.11329 | 3341  |
| Apoc4         | A_51_P460332 | NM_007385    | apolipoprotein C-IV                         | -1.307 | 53.87 | 0.57878 | 12428 P | -1.026 | 47.43 | 0.61731 | 9606  |
| Ate1          | A_52_P119290 | NM_001029895 | arginine-tRNA-protein transferase 1         | -1.307 | 61.79 | 0.698   | 18269 P | -1.182 | 0.92  | 0.01399 | 587   |
| Chd1          | A_52_P329250 | NM_007690    | chromodomain helicase DNA binding pro       | -1.307 | 31.88 | 0.33953 | 4909 P  | -1.027 | 49    | 0.78144 | 11004 |
| Hk2           | A_51_P204080 | NM_013820    | hexokinase 2                                | -1.307 | 69.29 | 0.78979 | 23417 P | 1.076  | 13.58 | 0.13414 | 3747  |
| Hoxb3         | A_51_P460643 | NM_001079869 | homeo box B3                                | -1.307 | 42.28 | 0.43906 | 7605 P  | 1.084  | 13.58 | 0.15085 | 4052  |
| Ikbbg         | A_52_P507853 | AK048446     | inhibitor of kappaB kinase gamma            | -1.307 | 35.45 | 0.37262 | 5674 P  | -1.128 | 4.63  | 0.05635 | 2040  |
| Khsrp         | A_52_P123252 | NM_010613    | KH-type splicing regulatory protein         | -1.307 | 69.29 | 0.80341 | 24310 P | 1.097  | 13.58 | 0.23432 | 5415  |
| BC019731      | A_52_P563917 | NM_144914    | cDNA sequence BC019731                      | -1.309 | 38.68 | 0.40486 | 6610 P  | 1.013  | 42.43 | 0.81537 | 11327 |
| BC043098      | A_52_P178998 | NM_174997    | cDNA sequence BC043098                      | -1.309 | 42.28 | 0.51736 | 8308 M  | 1.105  | 9.71  | 0.08176 | 2696  |
| Csrp1         | A_52_P209184 | NM_007791    | cysteine and glycine-rich protein 1         | -1.309 | 31.88 | 0.33582 | 4801 P  | -1.04  | 43.15 | 0.38179 | 7306  |
| 1500031H01Rik | A_52_P54856  | BC064081     | RIKEN cDNA 1500031H01 gene                  | -1.311 | 45.92 | 0.47092 | 8591 P  | 1.058  | 13.58 | 0.30038 | 5869  |
| 1700029G01Rik | A_52_P456192 | NM_025856    | RIKEN cDNA 1700029G01 gene                  | -1.311 | 42.28 | 0.43833 | 7582 P  | -1.034 | 44.4  | 0.45218 | 8017  |
| BC020002      | A_52_P483305 | NM_145374    | cDNA sequence BC020002                      | -1.311 | 25.79 | 0.31434 | 4233 P  | 1.014  | 42.43 | 0.80427 | 11212 |
| Folr2         | A_51_P162671 | NM_008035    | folate receptor 2 (fetal)                   | -1.311 | 38.68 | 0.41016 | 6742 P  | -1.022 | 49.22 | 0.74976 | 10786 |
| Pex26         | A_52_P354306 | NM_028730    | peroxisome biogenesis factor 26             | -1.311 | 35.45 | 0.36757 | 5577 P  | -1.018 | 48.39 | 0.66188 | 9988  |
| Ppm1l         | A_51_P212515 | NM_178726    | protein phosphatase 1 (formerly 2C)-like    | -1.311 | 45.92 | 0.50055 | 9664 P  | -1.247 | 2.04  | 0.0794  | 2639  |
| Psmb8         | A_51_P345367 | NM_010724    | proteasome (prosome, macropain) subur       | -1.311 | 49.93 | 0.53335 | 10845 P | 1.07   | 16.2  | 0.23494 | 5422  |
| Rbp1          | A_52_P418791 | NM_011254    | retinol binding protein 1, cellular         | -1.311 | 72.2  | 0.84365 | 27310 P | -1.188 | 2.53  | 0.05982 | 2150  |
| Stat1         | A_52_P70261  | NM_009283    | signal transducer and activator of transcri | -1.311 | 31.88 | 0.34117 | 4950 P  | 1.116  | 8.32  | 0.07833 | 2611  |
| Tdg           | A_52_P33287  | NM_011561    | thymine DNA glycosylase                     | -1.311 | 35.45 | 0.37895 | 5892 P  | 1.032  | 33.49 | 0.5959  | 9409  |
| 0610009O20Rik | A_51_P238405 | BC002117     | RIKEN cDNA 0610009O20 gene                  | -1.312 |       | 0.51328 | 9234 A  | 1.087  | 13.58 | 0.17832 | 4544  |
| 1110049F12Rik | A_51_P507129 | NM_025411    | RIKEN cDNA 1110049F12 gene                  | -1.312 | 20.94 | 0.41247 | 5649 M  | 1.057  | 28.13 | 0.59587 | 9408  |
| Arid1a        | A_51_P118671 | XM_992408    | AT rich interactive domain 1A (Swi1 like)   | -1.312 | 38.68 | 0.40993 | 6733 P  | 1.083  | 16.2  | 0.25246 | 5687  |
| Cenpa         | A_51_P273979 | NM_007681    | centromere protein A                        | -1.312 | 61.79 | 0.68143 | 17496 P | -1.002 | 49.48 | 0.97474 | 12784 |
| Cenpf         | A_51_P246119 | XM_899897    | centromere protein F                        | -1.312 | 49.93 | 0.59376 | 12539 M | -1.094 | 9.71  | 0.07542 | 2548  |
| Chst2         | A_51_P258894 | NM_018763    | carbohydrate sulfotransferase 2             | -1.312 | 49.93 | 0.55657 | 11627 P | -1.169 | 2.04  | 0.03953 | 1500  |
| Jmjd1b        | A_51_P383584 | XM_619530    | jumonji domain containing 1B                | -1.312 | 31.88 | 0.34986 | 5120 P  | 1.039  | 30.75 | 0.55887 | 9096  |
| Kdelr3        | A_52_P473966 | NM_134090    | KDEL (Lys-Asp-Glu-Leu) endoplasmic retic    | -1.312 | 23.47 | 0.29829 | 3776 P  | 1.044  | 30.75 | 0.54927 | 9015  |
| Sfrp2         | A_51_P520849 | NM_009144    | secreted frizzled-related protein 2         | -1.312 | 49.93 | 0.51644 | 10195 P | 1.075  | 13.58 | 0.14104 | 3863  |
| Usf1          | A_51_P233478 | NM_009480    | upstream transcription factor 1             | -1.312 | 42.28 | 0.4305  | 7361 P  | -1.127 | 8.32  | 0.11546 | 3389  |
| A330008L17Rik | A_52_P663296 | NM_175479    | RIKEN cDNA A330008L17 gene                  | -1.314 | 49.93 | 0.52211 | 10413 P | 1.03   | 33.49 | 0.51156 | 8682  |
| Dag1          | A_51_P148675 | NM_010017    | dystroglycan 1                              | -1.314 | 38.68 | 0.42304 | 7140 P  | 1.019  | 38.4  | 0.68053 | 10138 |
| Def8          | A_52_P29879  | NM_054046    | differentially expressed in FDCP 8          | -1.314 | 35.45 | 0.3773  | 5825 P  | -1.127 | 4.63  | 0.05915 | 2114  |
| Eef1d         | A_52_P477489 | NM_029663    | eukaryotic translation elongation factor 1  | -1.314 | 49.93 | 0.52683 | 10597 P | 1.091  | 13.58 | 0.21488 | 5118  |
| Luzp1         | A_52_P359621 | NM_024452    | leucine zipper protein 1                    | -1.314 | 25.79 | 0.31243 | 4199 P  | 1.051  | 25.31 | 0.35758 | 6981  |
| Mad2l1        | A_51_P230873 | NM_019499    | MAD2 (mitotic arrest deficient, homolog)    | -1.314 | 42.28 | 0.43021 | 7344 P  | 1.002  | 42.43 | 0.98302 | 12888 |
| Rhod          | A_51_P452953 | NM_007485    | ras homolog gene family, member D           | -1.314 | 57.76 | 0.6419  | 15788 P | 1.1    | 8.32  | 0.0606  | 2167  |
| Snx4          | A_51_P480779 | AK027953     | sorting nexin 4                             | -1.314 | 57.76 | 0.69991 | 17462 M | 1.071  | 19.02 | 0.27879 | 6073  |
| Syp           | A_51_P379428 | NM_009305    | synaptophysin                               | -1.314 | 53.87 | 0.51736 | 9823 P  | -1.339 | 0.51  | 0.00584 | 66    |
| Synv1         | A_51_P176341 | NM_028769    | synovial apoptosis inhibitor 1, synoviolin  | -1.314 | 57.76 | 0.61828 | 14307 P | 1.028  | 33.49 | 0.50642 | 8648  |

|               |               |              |                                             |        |       |         |         |        |       |         |       |
|---------------|---------------|--------------|---------------------------------------------|--------|-------|---------|---------|--------|-------|---------|-------|
| Tyk2          | A_51_P466824  | NM_018793    | tyrosine kinase 2                           | -1.314 | 45.92 | 0.49004 | 9239 P  | -1.02  | 48.39 | 0.65581 | 9925  |
| Z810429I04Rik | A_52_P502226  | AK043092     | RIKEN cDNA 2810429I04 gene                  | -1.316 | 38.68 | 0.39458 | 6351 P  | -1.223 | 0.66  | 0.01141 | 442   |
| A930028L21Rik | A_51_P406090  | AK020899     | RIKEN cDNA A930028L21 gene                  | -1.316 | 49.93 | 0.51272 | 10042 P | 1.034  | 30.75 | 0.49288 | 8477  |
| Aof2          | A_51_P463321  | NM_133872    | amine oxidase (flavin containing) domain    | -1.316 | 42.28 | 0.42411 | 7197 P  | -1.001 | 49.48 | 0.99461 | 13012 |
| Eif4e         | A_52_P1035759 | AK045366     |                                             | -1.316 | 25.79 | 0.3116  | 4186 P  | 1.139  | 5.75  | 0.05893 | 2102  |
| Ezh2          | A_51_P248067  | NM_007971    | enhancer of zeste homolog 2 (Drosophila)    | -1.316 | 45.92 | 0.49177 | 9312 P  | 1.02   | 42.43 | 0.93782 | 12459 |
| Foxj3         | A_52_P100208  | AK086875     | forkhead box J3                             | -1.316 | 20.94 | 0.27555 | 3324 P  | 1.134  | 8.32  | 0.10934 | 3247  |
| Gamt          | A_51_P484869  | NM_010255    | guanidinoacetate methyltransferase          | -1.316 | 53.87 | 0.49393 | 9025 P  | -1.078 | 22.1  | 0.14008 | 3856  |
| Irf1          | A_51_P146103  | NM_008390    | interferon regulatory factor 1              | -1.316 | 42.28 | 0.46319 | 8328 P  | 1.091  | 22.1  | 0.53618 | 8903  |
| Pex5          | A_52_P419007  | NM_008995    | peroxisome biogenesis factor 5              | -1.316 | 18.5  | 0.261   | 3005 P  | 1.072  | 16.2  | 0.20908 | 5033  |
| Plagl2        | A_52_P35377   | NM_018807    | pleiomorphic adenoma gene-like 2            | -1.316 | 49.93 | 0.51822 | 10292 P | 1.048  | 25.31 | 0.36187 | 7038  |
| Poldip3       | A_52_P113487  | AK052722     | polymerase (DNA-directed), delta interact   | -1.316 | 57.76 | 0.63575 | 15517 P | -1.027 | 46.85 | 0.57885 | 9252  |
| Prpf8         | A_51_P168662  | NM_138659    | pre-mRNA processing factor 8                | -1.316 | 42.28 | 0.43969 | 7619 P  | -1.134 | 2.53  | 0.03334 | 1299  |
| Rnf6          | A_52_P344116  | NM_028774    | ring finger protein (C3H2C3 type) 6         | -1.316 | 61.79 | 0.66969 | 17015 P | 1.027  | 33.49 | 0.53134 | 8852  |
| Slc7a1        | A_51_P243246  | NM_007513    | solute carrier family 7 (cationic amino aci | -1.316 |       | 0.47332 | 7987 A  | 1.179  | 4.63  | 0.06194 | 2188  |
| Arhgef12      | A_52_P390227  | NM_027144    | Rho guanine nucleotide exchange factor (    | -1.318 | 16.01 | 0.25139 | 2808 P  | 1.155  | 9.71  | 0.19014 | 4724  |
| Hrb           | A_51_P191021  | NM_010472    | HIV-1 Rev binding protein                   | -1.318 | 31.88 | 0.33699 | 4829 P  | -1.084 | 33.49 | 0.35878 | 6990  |
| Myt1          | A_51_P407480  | NM_008665    | myelin transcription factor 1               | -1.318 | 38.68 | 0.49852 | 7833 M  | 1.026  | 33.49 | 0.55121 | 9046  |
| Nr5a2         | A_51_P514449  | NM_030676    | nuclear receptor subfamily 5, group A, me   | -1.318 | 45.92 | 0.48412 | 9061 P  | 1.07   | 16.2  | 0.17804 | 4540  |
| Rnf138        | A_51_P261608  | AB025011     | ring finger protein 138                     | -1.318 | 28.61 | 0.33133 | 4693 P  | -1.168 | 3.46  | 0.069   | 2377  |
| Stk24         | A_51_P221625  | NM_145465    | serine/threonine kinase 24 (STE20 homol     | -1.318 | 20.94 | 0.4077  | 5512 M  | 1.012  | 42.43 | 0.8227  | 11386 |
| Bok           | A_51_P373082  | AF027707     | Bcl-2-related ovarian killer protein        | -1.319 | 49.93 | 0.54963 | 11429 P | -1.053 | 36.07 | 0.027   | 5958  |
| Mical1        | A_51_P356760  | NM_138315    | microtubule associated monooxygenase, c     | -1.319 | 57.76 | 0.62303 | 14591 P | -1.108 | 8.32  | 0.08255 | 2716  |
| Mvk           | A_52_P569067  | NM_023556    | mevalonate kinase                           | -1.319 | 28.61 | 0.33032 | 4677 P  | 1.05   | 25.31 | 0.36715 | 7130  |
| Pank3         | A_52_P572197  | NM_145962    | pantothenate kinase 3                       | -1.319 | 38.68 | 0.39887 | 6484 P  | 1.064  | 19.02 | 0.2199  | 5207  |
| Tfrc          | A_52_P228236  | NM_011638    | transferrin receptor                        | -1.319 | 35.45 | 0.38726 | 6108 P  | 1.103  | 8.32  | 0.06895 | 2376  |
| Zfp295        | A_52_P574527  | AK129313     | zinc finger protein 295                     | -1.319 | 45.92 | 0.50247 | 9742 P  | 1.058  | 28.13 | 0.56078 | 9116  |
| Acadl         | A_51_P149455  | NM_007381    | acyl-Coenzyme A dehydrogenase, long-ch      | -1.321 | 28.61 | 0.31417 | 4232 P  | -1.05  | 40.63 | 0.31526 | 6528  |
| Icam1         | A_52_P613241  | NM_010493    | intercellular adhesion molecule             | -1.321 | 45.92 | 0.47782 | 8889 P  | 1.092  | 11.33 | 0.15885 | 4197  |
| Lmtk2         | A_51_P103533  | XM_132499    | lemur tyrosine kinase 2                     | -1.321 | 49.93 | 0.55303 | 11533 P | 1.07   | 16.2  | 0.23607 | 5431  |
| BC024479      | A_51_P321136  | NM_146222    | cDNA sequence BC024479                      | -1.323 | 45.92 | 0.47599 | 8824 P  | 1.044  | 33.49 | 0.68286 | 10168 |
| Chic2         | A_51_P148311  | NM_028850    | cysteine-rich hydrophobic domain 2          | -1.323 | 31.88 | 0.34113 | 4945 P  | 1.058  | 22.1  | 0.28393 | 6135  |
| D130059P03Rik | A_51_P239036  | NM_177185    | RIKEN cDNA D130059P03 gene                  | -1.323 | 35.45 | 0.36329 | 5469 P  | 1.034  | 30.75 | 0.46816 | 8189  |
| Il4ra         | A_51_P464478  | NM_001008700 | interleukin 4 receptor, alpha               | -1.323 | 38.68 | 0.40156 | 6541 P  | -1.022 | 48.7  | 0.69323 | 10269 |
| Pcm1          | A_51_P420698  | NM_023662    | pericentriolar material 1                   | -1.323 | 31.88 | 0.34074 | 4939 P  | 1.015  | 40.63 | 0.75358 | 10813 |
| Pla2g6        | A_51_P464860  | NM_016915    | phospholipase A2, group VI                  | -1.325 | 49.93 | 0.5505  | 11453 P | -1.091 | 9.71  | 0.07749 | 2586  |
| Ppp1r3f       | A_51_P264487  | NM_138605    | protein phosphatase 1, regulatory (inhibit  | -1.325 | 45.92 | 0.49689 | 9495 P  | 1.009  | 42.43 | 0.88445 | 11918 |
| Praf2         | A_52_P597338  | NM_138602    | PRA1 domain family 2                        | -1.325 | 53.87 | 0.60495 | 13683 P | 1.042  | 33.49 | 0.68661 | 10210 |
| 4833439L19Rik | A_51_P158007  | NM_133797    | RIKEN cDNA 4833439L19 gene                  | -1.326 | 49.93 | 0.59665 | 10620 M | 1.079  | 19.02 | 0.29916 | 6303  |
| Gusb          | A_51_P211491  | NM_010368    | glucuronidase, beta                         | -1.326 | 42.28 | 0.43073 | 7380 P  | 1      | 49.48 | 0.99824 | 13046 |
| Slc26a2       | A_52_P83905   | NM_007885    | solute carrier family 26 (sulfate transport | -1.326 | 45.92 | 0.50284 | 9778 M  | 1.118  | 6.98  | 0.05119 | 1881  |
| Slc39a5       | A_51_P206235  | NM_028051    | solute carrier family 39 (metal ion transpo | -1.326 | 28.61 | 0.31643 | 4277 P  | 1.037  | 30.75 | 0.46355 | 8146  |
| Asxl2         | A_51_P250433  | NM_172421    | additional sex combs like 2 (Drosophila)    | -1.328 | 38.68 | 0.40877 | 6689 P  | 1.117  | 6.98  | 0.05149 | 1895  |
| Atf1          | A_52_P228079  | NM_007497    | activating transcription factor 1           | -1.328 | 23.47 | 0.29225 | 3662 P  | 1.075  | 13.58 | 0.178   | 4539  |
| Gprc5b        | A_51_P173709  | NM_022420    | G protein-coupled receptor, family C, gro   | -1.328 | 35.45 | 0.38406 | 6009 P  | 1.11   | 11.33 | 0.19654 | 4845  |
| Lmo4          | A_52_P330314  | AK033097     | LIM domain only 4                           | -1.328 | 72.2  | 0.87536 | 29289 P | -1.013 | 49.48 | 0.79287 | 11122 |
| Pld1          | A_52_P578359  | NM_008875    | phospholipase D1                            | -1.328 | 61.79 | 0.6933  | 18077 P | 1.014  | 42.43 | 0.82056 | 11368 |
| Prpsap1       | A_52_P642109  | BC029621     | phosphoribosyl pyrophosphate synthetas      | -1.328 | 31.88 | 0.33511 | 4777 P  | 1.062  | 22.1  | 0.30267 | 6346  |
| Tead2         | A_52_P39546   | NM_011565    | TEA domain family member 2                  | -1.328 | 38.68 | 0.41909 | 6993 P  | -1.017 | 49.48 | 0.80093 | 11186 |
| Cuzd1         | A_51_P155465  | NM_008411    | CUB and zona pellucida-like domains 1       | -1.33  | 38.68 | 0.51873 | 9881 P  | -1.38  | 0.51  | 0.0146  | 621   |
| Sec24d        | A_51_P141274  | NM_027135    | SEC24 related gene family, member D (S.     | -1.33  | 20.94 | 0.27031 | 3156 P  | 1.113  | 9.71  | 0.1203  | 3499  |
| Sgpl1         | A_51_P391695  | NM_009163    | sphingosine phosphate lyase 1               | -1.33  | 25.79 | 0.30923 | 4140 P  | -1.113 | 11.33 | 0.12534 | 3612  |
| Srpr          | A_52_P134666  | NM_026130    | signal recognition particle receptor ('dock | -1.33  | 23.47 | 0.27727 | 3372 P  | 1.073  | 19.02 | 0.31282 | 6486  |



|               |              |                    |                                            |        |       |         |         |        |       |         |       |
|---------------|--------------|--------------------|--------------------------------------------|--------|-------|---------|---------|--------|-------|---------|-------|
| Tle1          | A_52_P328044 | NM_011599          | transducin-like enhancer of split 1, homol | -1.33  | 12.21 | 0.23742 | 2488 P  | 1.075  | 13.58 | 0.13581 | 3771  |
| Vdac1         | A_52_P909310 | NM_011694          | voltage-dependent anion channel 1          | -1.33  | 49.93 | 0.57768 | 9959 M  | -1.002 | 49.48 | 0.97546 | 12795 |
| 1810015A11Rik | A_51_P202244 | AK032396           | RIKEN cDNA 1810015A11 gene                 | -1.332 |       | 0.72951 | 10639 A | 1.135  | 6.98  | 0.05982 | 2149  |
| Klh8          | A_51_P402393 | NM_178741          | kelch-like 8 (Drosophila)                  | -1.332 | 18.5  | 0.25354 | 2875 P  | -1.045 | 43.75 | 0.44191 | 7937  |
| Usp36         | A_51_P119016 | XM_126772          | ubiquitin specific peptidase 36            | -1.332 | 42.28 | 0.4623  | 8301 P  | 1.05   | 25.31 | 0.35484 | 6952  |
| Zfp281        | A_51_P438479 | NM_177643          | zinc finger protein 281                    | -1.333 | 35.45 | 0.37569 | 5741 P  | 1.107  | 9.71  | 0.12478 | 3593  |
| Aco2          | A_52_P899263 | AK029122           | aconitase 2, mitochondrial                 | -1.335 | 42.28 | 0.43862 | 7595 M  | 1.018  | 38.4  | 0.6682  | 10026 |
| Diap1         | A_51_P427768 | NM_007858          | diaphanous homolog 1 (Drosophila)          | -1.335 | 31.88 | 0.33527 | 4781 P  | -1.084 | 28.13 | 0.2603  | 5815  |
| Dnajb11       | A_51_P188073 | ENSMUST00000004574 | Dnaj (Hsp40) homolog, subfamily B, mem     | -1.335 | 25.79 | 0.41235 | 5645 M  | 1.539  | 1.58  | 0.06258 | 2213  |
| Farsla        | A_52_P323975 | NM_025648          | phenylalanyl-tRNA synthetase, alpha subu   | -1.335 | 31.88 | 0.35263 | 5179 P  | 1.026  | 40.63 | 0.80671 | 11247 |
| Slc35d1       | A_52_P137331 | AK037934           | solute carrier family 35 (UDP-glucuronic a | -1.335 | 53.87 | 0.51294 | 8362 M  | 1.124  | 9.71  | 0.12479 | 3599  |
| Txnip         | A_52_P420792 | NM_001009935       | thioredoxin interacting protein            | -1.335 | 49.93 | 0.55311 | 11538 P | 1.314  | 8.32  | 0.33411 | 6730  |
| Zfp496        | A_51_P515173 | NM_172941          | zinc finger with KRAB and SCAN domains     | -1.335 | 49.93 | 0.54476 | 11194 P | 1.018  | 38.4  | 0.68343 | 10175 |
| Adam9         | A_51_P518378 | NM_007404          | a disintegrin and metallopeptidase doma    | -1.337 | 28.61 | 0.32851 | 4609 P  | -1.164 | 2.53  | 0.03749 | 1429  |
| Csk           | A_52_P397204 | NM_007783          | c-src tyrosine kinase                      | -1.337 | 42.28 | 0.51432 | 8226 M  | 1.264  | 3.01  | 0.05665 | 2048  |
| Lasp1         | A_52_P419298 | NM_010688          | LIM and SH3 protein 1                      | -1.337 | 38.68 | 0.40568 | 6623 P  | 1.078  | 19.02 | 0.30486 | 6384  |
| Armc7         | A_51_P162676 | NM_177778          | armadillo repeat containing 7              | -1.339 | 49.93 | 0.532   | 10789 P | 1.119  | 8.32  | 0.0744  | 2515  |
| Arpc1b        | A_51_P331279 | NM_023142          | actin related protein 2/3 complex, subuni  | -1.339 | 45.92 | 0.50272 | 9761 P  | -1.013 | 49.48 | 0.7935  | 11124 |
| Capn7         | A_52_P623782 | NM_009796          | calpain 7                                  | -1.339 | 18.5  | 0.29034 | 3374 P  | 1.034  | 33.49 | 0.58504 | 9302  |
| D16Bwg1494e   | A_51_P165082 | AB041601           | DNA segment, Chr 16, Brigham & Womer       | -1.339 | 49.93 | 0.53849 | 11009 P | -1.273 | 0.51  | 0.00697 | 217   |
| Gale          | A_51_P401193 | NM_178389          | galactose-4-epimerase, UDP                 | -1.339 | 42.28 | 0.45913 | 8186 P  | 1.175  | 2.53  | 0.01663 | 715   |
| Tfdp1         | A_52_P375493 | AK030820           | transcription factor Dp 1                  | -1.339 | 23.47 | 0.28718 | 3552 P  | -1.172 | 2.04  | 0.04199 | 1583  |
| 1810006K21Rik | A_52_P17635  | BC024923           | RIKEN cDNA 1810006K21 gene                 | -1.34  | 53.87 | 0.59535 | 13257 P | 1.006  | 42.43 | 0.91513 | 12218 |
| 5430440L12Rik | A_52_P962404 | AK017417           | RIKEN cDNA 5430440L12 gene                 | -1.34  | 45.92 | 0.47517 | 8802 P  | 1.07   | 22.1  | 0.43568 | 7894  |
| Bcl2l1        | A_52_P148861 | NM_009743          | Bcl2-like 1                                | -1.34  | 45.92 | 0.48772 | 9178 P  | 1.217  | 2.53  | 0.02014 | 864   |
| C1galt1       | A_51_P165475 | NM_052993          | core 1 synthase, glycoprotein-N-acetylgl   | -1.34  | 35.45 | 0.37456 | 5727 P  | -1.207 | 1.18  | 0.01986 | 850   |
| Mkl1          | A_51_P174894 | BC050941           | MKL (megakaryoblastic leukemia)/myoca      | -1.34  | 53.87 | 0.58125 | 12604 P | -1.07  | 33.49 | 0.26561 | 5887  |
| Pdgfrl        | A_51_P466229 | NM_026840          | platelet-derived growth factor receptor-li | -1.34  | 18.5  | 0.25516 | 2938 P  | 1.008  | 42.43 | 0.8756  | 11817 |
| Pdzrn3        | A_52_P327176 | NM_018884          | PDZ domain containing RING finger 3        | -1.34  | 38.68 | 0.39447 | 6319 P  | 1      | 49.48 | 0.99613 | 13024 |
| Tjp2          | A_52_P396042 | NM_011597          | tight junction protein 2                   | -1.34  | 38.68 | 0.41743 | 6952 P  | -1.035 | 46.3  | 0.62481 | 9670  |
| Tmem39b       | A_52_P357039 | NM_199305          | transmembrane protein 39b                  | -1.34  | 25.79 | 0.29354 | 3689 P  | -1.219 | 0.75  | 0.01152 | 469   |
| Zfp313        | A_51_P259378 | NM_030743          | zinc finger protein 313                    | -1.34  | 42.28 | 0.4614  | 8259 P  | 1.073  | 13.58 | 0.23519 | 5007  |
| 2810417H13Rik | A_52_P13448  | NM_026515          | RIKEN cDNA 2810417H13 gene                 | -1.342 | 61.79 | 0.6817  | 17507 P | -1.162 | 1.62  | 0.02874 | 1160  |
| Fgf10         | A_52_P42269  | NM_008002          | fibroblast growth factor 10                | -1.342 | 69.29 | 0.79717 | 23949 P | -1.025 | 48.7  | 0.73225 | 10604 |
| Gsta1         | A_51_P305140 | NM_008181          | glutathione S-transferase, alpha 1 (Ya)    | -1.342 | 77.44 | 0.92504 | 33453 P | 1.056  | 19.02 | 0.21983 | 5202  |
| Ppp2cb        | A_51_P125538 | NM_017374          | protein phosphatase 2 (formerly 2A), cata  | -1.342 | 35.45 | 0.37577 | 5744 P  | -1.341 | 0.51  | 0.00965 | 351   |
| Tjp1          | A_51_P390739 | NM_009386          | tight junction protein 1                   | -1.342 | 31.88 | 0.34261 | 4971 P  | -1.033 | 48.39 | 0.78612 | 11056 |
| Map3k2        | A_52_P448559 | AK036364           | mitogen activated protein kinase kinase k  | -1.344 |       | 0.82024 | 10811 A | 1.113  | 9.71  | 0.11089 | 3289  |
| Sec63         | A_52_P363203 | AK090248           | SEC63-like (S. cerevisiae)                 | -1.344 | 57.76 | 0.65823 | 16501 P | -1.064 | 33.49 | 0.26585 | 5892  |
| TLK1          | A_51_P287272 | NM_172664          | tousled-like kinase 1                      | -1.344 | 25.79 | 0.40914 | 5542 M  | 1.073  | 13.58 | 0.16503 | 4294  |
| 9630030I15Rik | A_51_P167505 | AK079340           | RIKEN cDNA 9630030I15 gene                 | -1.346 | 49.93 | 0.47827 | 8525 P  | -1.045 | 42.43 | 0.34459 | 6816  |
| Cars          | A_51_P374863 | NM_013742          | cysteinyl-tRNA synthetase                  | -1.346 | 31.88 | 0.33273 | 4729 P  | -1.117 | 8.32  | 0.07967 | 2649  |
| Clec2i        | A_51_P182311 | NM_020257          | C-type lectin domain family 2, member i    | -1.346 | 13.61 | 0.23063 | 2373 P  | 1.02   | 38.4  | 0.7056  | 10371 |
| D930015E06Rik | A_52_P551603 | NM_172681          | RIKEN cDNA D930015E06 gene                 | -1.346 | 16.01 | 0.23887 | 2529 P  | 1.05   | 25.31 | 0.36956 | 7159  |
| F11r          | A_51_P458866 | NM_172647          | F11 receptor                               | -1.346 | 23.47 | 0.28614 | 3531 P  | 1.026  | 33.49 | 0.54363 | 8974  |
| Por           | A_51_P207921 | NM_008898          | P450 (cytochrome) oxidoreductase           | -1.348 | 49.93 | 0.51792 | 10256 P | -1.017 | 49.47 | 0.73345 | 10613 |
| Trp53bp2      | A_51_P363564 | NM_173378          | transformation related protein 53 binding  | -1.348 | 13.61 | 0.22953 | 2331 P  | 1.226  | 2.53  | 0.03013 | 1203  |
| Cenph         | A_51_P492830 | NM_021886          | centromere protein H                       | -1.35  | 38.68 | 0.41119 | 6794 P  | 1.004  | 42.43 | 0.95341 | 12611 |
| Dexi          | A_51_P336622 | NM_021428          | dexamethasone-induced transcript           | -1.35  | 45.92 | 0.48031 | 8954 P  | 1.053  | 19.02 | 0.25371 | 5713  |
| Jup           | A_52_P401386 | NM_010593          | junction plakoglobin                       | -1.35  | 38.68 | 0.41311 | 6850 P  | -1.235 | 0.75  | 0.01485 | 635   |
| Sox4          | A_51_P105178 | NM_009238          | SRY-box containing gene 4                  | -1.35  | 23.47 | 0.27834 | 3396 P  | -1.237 | 0.56  | 0.00985 | 366   |
| Naga          | A_51_P117130 | NM_008669          | N-acetyl galactosaminidase, alpha          | -1.351 | 16.01 | 0.24137 | 2567 P  | -1.207 | 1.18  | 0.01933 | 811   |
| St3gal6       | A_51_P281333 | NM_018784          | ST3 beta-galactoside alpha-2,3-sialyltrans | -1.351 | 45.92 | 0.50253 | 9746 P  | 1.056  | 19.02 | 0.23823 | 5460  |

|               |              |              |                                              |        |       |         |         |        |       |         |       |
|---------------|--------------|--------------|----------------------------------------------|--------|-------|---------|---------|--------|-------|---------|-------|
| Stard13       | A_52_P435118 | NM_146258    | serologically defined colon cancer antigen   | -1.351 | 45.92 | 0.50196 | 9718 M  | -1.354 | 0.51  | 0.00699 | 218   |
| O610007L01Rik | A_52_P7183   | BC033455     | RIKEN cDNA O610007L01 gene                   | -1.353 | 28.61 | 0.32995 | 4670 P  | -1.314 | 0.51  | 0.0067  | 200   |
| Cd164         | A_52_P220090 | NM_016898    | CD164 antigen                                | -1.353 | 18.5  | 0.24428 | 2681 P  | 1.1    | 11.33 | 0.15494 | 4129  |
| Nanog         | A_51_P294233 | NM_028016    | Nanog homeobox                               | -1.353 | 57.76 | 0.65862 | 16534 P | 1.213  | 3.82  | 0.11418 | 3089  |
| Rcor1         | A_52_P535052 | NM_198023    | REST corepressor 1                           | -1.353 | 23.47 | 0.30716 | 3917 P  | 1.069  | 16.2  | 0.18081 | 4592  |
| 5430407P10Rik | A_51_P474169 | NM_144883    | RIKEN cDNA 5430407P10 gene                   | -1.355 | 28.61 | 0.30755 | 4083 P  | -1.073 | 28.13 | 0.19009 | 4721  |
| 5830434P21Rik | A_52_P686136 | NM_172661    | RIKEN cDNA 5830434P21 gene                   | -1.355 | 57.76 | 0.65846 | 12475 M | 1.07   | 22.1  | 0.37717 | 7244  |
| Rassf3        | A_52_P460703 | NM_138956    | Ras association (RalGDS/AF-6) domain fam     | -1.355 | 42.28 | 0.47093 | 8601 P  | 1.208  | 8.32  | 0.21043 | 5046  |
| Sfmbt1        | A_52_P160518 | NM_019460    | Scm-like with four mbt domains 1             | -1.355 | 28.61 | 0.32851 | 4625 P  | -1.18  | 1.32  | 0.02201 | 935   |
| Ctdspl        | A_51_P486943 | NM_133710    | CTD (carboxy-terminal domain, RNA poly       | -1.357 | 42.28 | 0.45371 | 8019 P  | -1.095 | 11.33 | 0.08536 | 2779  |
| Fbxl20        | A_51_P500996 | NM_028149    | F-box and leucine-rich repeat protein 20     | -1.357 | 31.88 | 0.34944 | 5111 P  | -1.003 | 49.48 | 0.96288 | 12691 |
| HYOU1         | A_52_P122830 | NM_021395    | hypoxia up-regulated 1                       | -1.357 | 49.93 | 0.60024 | 10721 M | 1.071  | 22.1  | 0.37574 | 7232  |
| Slc39a14      | A_51_P282983 | NM_144808    | solute carrier family 39 (zinc transporter), | -1.357 | 23.47 | 0.27555 | 3335 P  | 1.116  | 8.32  | 0.08637 | 2808  |
| 1110021L09Rik | A_51_P369381 | AK003902     | RIKEN cDNA 1110021L09 gene                   | -1.359 | 38.68 | 0.41411 | 6869 P  | 1.042  | 33.49 | 0.67054 | 10056 |
| Anxa11        | A_51_P280597 | NM_013469    | annexin A11                                  | -1.359 | 28.61 | 0.3104  | 4167 P  | -1.042 | 43.15 | 0.36206 | 7048  |
| Cyp2d22       | A_52_P478420 | AK086555     | cytochrome P450, family 2, subfamily d, p    | -1.359 | 49.93 | 0.56997 | 12057 P | 1.006  | 42.43 | 0.91644 | 12232 |
| Farp1         | A_51_P332939 | NM_134082    | FERM, RhoGEF (Arhgef) and pleckstrin do      | -1.359 | 31.88 | 0.35679 | 5273 P  | 1.174  | 11.33 | 0.31208 | 6479  |
| Ptprn2        | A_52_P50150  | NM_011215    | protein tyrosine phosphatase, receptor ty    | -1.359 | 49.93 | 0.56811 | 12001 P | 1.005  | 42.43 | 0.9227  | 12296 |
| Tgif2         | A_51_P456657 | NM_173396    | TGFB-induced factor 2                        | -1.359 | 45.92 | 0.51785 | 10248 P | 1.038  | 28.13 | 0.40075 | 7526  |
| Usp48         | A_52_P175086 | NM_130879    | ubiquitin specific peptidase 48              | -1.359 | 13.61 | 0.22589 | 2302 P  | 1.034  | 33.49 | 0.56467 | 9162  |
| Hao3          | A_51_P114722 | NM_019545    | hydroxyacid oxidase (glycolate oxidase) 3    | -1.361 |       | 0.70407 | 9976 A  | -1.084 | 19.02 | 0.12478 | 3598  |
| 1700049E15Rik | A_52_P794440 | BY706721     | RIKEN cDNA 1700049E15 gene                   | -1.362 | 31.88 | 0.34833 | 4907 M  | 1.025  | 36.07 | 0.60894 | 9512  |
| AI931714      | A_52_P203143 | AK045296     | expressed sequence AI931714                  | -1.362 | 49.93 | 0.63454 | 12171 M | -1.117 | 8.32  | 0.08005 | 2656  |
| BC021381      | A_51_P407879 | NM_145382    | cDNA sequence BC021381                       | -1.362 | 45.92 | 0.56811 | 9686 M  | 1      | 42.43 | 0.99858 | 13041 |
| Has2          | A_51_P213359 | NM_008216    | hyaluronan synthase 2                        | -1.362 | 12.21 | 0.21476 | 2118 P  | 1.006  | 42.43 | 0.89842 | 12049 |
| Cdc2l6        | A_51_P479464 | AK122421     | cell division cycle 2-like 6 (CDK8-like)     | -1.364 | 31.88 | 0.35343 | 5200 P  | -1.155 | 4.63  | 0.09017 | 2899  |
| D17Wsu92e     | A_51_P397920 | NM_001033279 | DNA segment, Chr 17, Wayne State Univ        | -1.366 | 20.94 | 0.26612 | 3083 P  | -1.272 | 0.51  | 0.00772 | 289   |
| Mapre2        | A_51_P438149 | NM_153058    | microtubule-associated protein, RP/EB fa     | -1.366 | 35.45 | 0.46053 | 6799 M  | 1.104  | 16.2  | 0.37208 | 7196  |
| Serpini2      | A_51_P510900 | NM_026460    | serine (or cysteine) peptidase inhibitor, cl | -1.366 | 28.61 | 0.32181 | 4420 P  | 1.035  | 40.63 | 0.84339 | 11549 |
| Ltbr          | A_51_P156274 | NM_010736    | lymphotoxin B receptor                       | -1.368 | 35.45 | 0.37262 | 5669 P  | 1.046  | 25.31 | 0.32183 | 6582  |
| Plcl2         | A_51_P219444 | NM_013880    | phospholipase C-like 2                       | -1.368 | 31.88 | 0.33757 | 4863 P  | -1.002 | 49.48 | 0.97261 | 12764 |
| 5730446C15Rik | A_52_P102022 | AK017641     | RIKEN cDNA 5730446C15 gene                   | -1.37  | 42.28 | 0.43593 | 7516 M  | 1.022  | 38.4  | 0.65689 | 9947  |
| Vkorc1l1      | A_52_P96552  | NM_027121    | vitamin K epoxide reductase complex, sub     | -1.37  | 13.61 | 0.22315 | 2251 P  | -1.081 | 28.13 | 0.21745 | 5162  |
| Ap2m1         | A_52_P422976 | AK141862     | adaptor protein complex AP-2, mu1            | -1.372 | 49.93 | 0.57024 | 12066 P | -1.083 | 19.02 | 0.12322 | 3562  |
| 2310044G17Rik | A_52_P366772 | NM_173735    | RIKEN cDNA 2310044G17 gene                   | -1.374 | 28.61 | 0.32076 | 4383 P  | 1.003  | 42.43 | 0.96229 | 12685 |
| Disp2         | A_52_P627068 | NM_170593    | dispatched homolog 2 (Drosophila)            | -1.374 | 49.93 | 0.59945 | 10704 M | 1.132  | 16.2  | 0.4549  | 8045  |
| Fgf9          | A_51_P497152 | NM_013518    | fibroblast growth factor 9                   | -1.374 | 28.61 | 0.30794 | 4115 P  | 1.001  | 42.43 | 0.98311 | 12892 |
| Gja5          | A_52_P525317 | NM_008121    | gap junction membrane channel protein a      | -1.374 | 49.93 | 0.57439 | 12211 P | -1.072 | 33.49 | 0.27297 | 5998  |
| Il2rb         | A_51_P286496 | NM_008368    | interleukin 2 receptor, beta chain           | -1.374 | 53.87 | 0.60112 | 13510 P | 1.035  | 30.75 | 0.43031 | 7825  |
| Adcy9         | A_51_P501538 | NM_009624    | adenylate cyclase 9                          | -1.376 | 13.61 | 0.21981 | 2194 P  | 1.107  | 8.32  | 0.06396 | 2254  |
| Hoxa9         | A_51_P117924 | NM_010456    | homeo box A9                                 | -1.376 | 38.68 | 0.41401 | 6867 P  | 1.078  | 11.33 | 0.10686 | 3215  |
| Pfn1          | A_51_P220993 | NM_011072    | profilin 1                                   | -1.376 | 28.61 | 0.31692 | 4285 P  | 1.016  | 42.43 | 0.87812 | 11842 |
| Rnf2          | A_52_P149743 | NM_011277    | ring finger protein 2                        | -1.376 | 31.88 | 0.33203 | 4705 P  | 1.031  | 36.07 | 0.65133 | 9894  |
| Socs4         | A_51_P165424 | NM_080843    | suppressor of cytokine signaling 4           | -1.376 | 53.87 | 0.58261 | 12654 P | 1.005  | 42.43 | 0.93297 | 12408 |
| 4632419K20Rik | A_52_P644072 | AK014591     | RIKEN cDNA 4632419K20 gene                   | -1.377 | 49.93 | 0.5405  | 11041 P | 1.132  | 6.98  | 0.07548 | 2551  |
| Akr1c20       | A_51_P382764 | BC021607     | aldo-keto reductase family 1, member C2      | -1.377 |       | 0.57961 | 8449 A  | 1.042  | 28.13 | 0.38385 | 7323  |
| Cotl1         | A_52_P435356 | NM_028071    | coactosin-like 1 (Dictyostelium)             | -1.377 | 38.68 | 0.41841 | 6976 P  | -1.081 | 19.02 | 0.1399  | 3849  |
| Qscn6         | A_52_P302304 | NM_023268    | quiescin Q6                                  | -1.377 | 25.79 | 0.29606 | 3720 P  | -1.214 | 0.75  | 0.01251 | 506   |
| Xpr1          | A_52_P678117 | NM_011273    | xenotropic and polytropic retrovirus rece    | -1.377 | 49.93 | 0.52683 | 10593 P | 1.117  | 8.32  | 0.07115 | 2417  |
| 1810010M01Rik | A_51_P140429 | NM_026918    | RIKEN cDNA 1810010M01 gene                   | -1.379 | 45.92 | 0.55657 | 9401 M  | -1.087 | 38.4  | 0.50326 | 8612  |
| AI413194      | A_51_P181785 | AK033727     | expressed sequence AI413194                  | -1.379 | 18.5  | 0.24282 | 2611 P  | 1.02   | 40.63 | 0.73795 | 10659 |
| Myo18a        | A_51_P396375 | NM_011586    | myosin XVIIIa                                | -1.379 | 42.28 | 0.47485 | 8794 P  | -1.098 | 16.2  | 0.14307 | 3906  |
| Pbx4          | A_51_P428781 | NM_001024954 | pre-B-cell leukemia transcription factor 4   | -1.379 | 45.92 | 0.50184 | 9700 P  | 1.008  | 42.43 | 0.8896  | 11962 |

|               |              |              |                                              |        |       |         |         |        |       |         |       |
|---------------|--------------|--------------|----------------------------------------------|--------|-------|---------|---------|--------|-------|---------|-------|
| Ace2          | A_51_P257496 | NM_027286    | angiotensin I converting enzyme (peptidyl    | -1.381 | 13.61 | 0.24282 | 2512 P  | -1.17  | 2.04  | 0.03454 | 1325  |
| BC060631      | A_51_P339824 | NM_177700    | cDNA sequence BC060631                       | -1.381 | 53.87 | 0.5816  | 12624 P | -1.037 | 46.3  | 0.67913 | 10130 |
| Kcnj11        | A_52_P402705 | NM_010602    | potassium inwardly rectifying channel, su    | -1.381 | 25.79 | 0.29912 | 3831 P  | -1.135 | 3.82  | 0.0482  | 1802  |
| Ptch2         | A_51_P410346 | NM_008958    | patched homolog 2                            | -1.381 | 20.94 | 0.24913 | 2774 P  | 1.012  | 42.43 | 0.79039 | 11097 |
| Tdh           | A_51_P143712 | NM_021480    | L-threonine dehydrogenase                    | -1.381 | 65.79 | 0.74536 | 20865 P | 1.043  | 25.31 | 0.31828 | 6558  |
| B230206F22Rik | A_52_P177865 | AK035525     | RIKEN cDNA B230206F22 gene                   | -1.383 | 45.92 | 0.49841 | 9591 P  | 1.135  | 6.98  | 0.08441 | 2762  |
| Ccm2          | A_51_P314895 | NM_146014    | cerebral cavernous malformation 2 homo       | -1.383 | 12.21 | 0.20511 | 2012 P  | 1.035  | 33.49 | 0.64357 | 9822  |
| Csnk1g1       | A_51_P329733 | NM_173185    | casein kinase 1, gamma 1                     | -1.383 |       | 0.69665 | 11705 A | 1.137  | 4.63  | 0.03516 | 1354  |
| Hist1h2ab     | A_52_P420466 | NM_175660    | histone cluster 1, H2ab                      | -1.383 | 57.76 | 0.39874 | 5350 M  | 1.048  | 22.1  | 0.29561 | 6279  |
| Muc1          | A_51_P467346 | NM_013605    | mucin 1, transmembrane                       | -1.383 | 53.87 | 0.58861 | 12911 P | -1.479 | 0     | 0.00584 | 14    |
| Ncoa5         | A_52_P223080 | NM_144892    | nuclear receptor coactivator 5               | -1.383 | 25.79 | 0.29304 | 3681 P  | 1.038  | 33.49 | 0.6452  | 9846  |
| Suclg2        | A_51_P478672 | NM_011507    | succinate-Coenzyme A ligase, GDP-formin      | -1.383 | 35.45 | 0.38735 | 6114 P  | -1.086 | 19.02 | 0.13993 | 3853  |
| Zfp397        | A_51_P101086 | NM_027007    | zinc finger protein 397                      | -1.383 | 49.93 | 0.53962 | 11027 P | 1.235  | 1.62  | 0.01469 | 629   |
| Zranb1        | A_51_P225048 | AK010069     | zinc finger, RAN-binding domain containi     | -1.383 | 13.61 | 0.21523 | 2124 P  | -1.082 | 38.4  | 0.47276 | 8224  |
| 3300001A09Rik | A_51_P415395 | BC039571     | RIKEN cDNA 3300001A09 gene                   | -1.385 | 45.92 | 0.52501 | 10544 P | -1.251 | 0.56  | 0.01026 | 392   |
| Dut           | A_51_P418469 | NM_023595    | deoxyuridine triphosphatase                  | -1.385 | 28.61 | 0.3288  | 4636 P  | 1.109  | 9.71  | 0.09821 | 3065  |
| E130014J05Rik | A_51_P340083 | NM_001040400 | RIKEN cDNA E130014J05 gene                   | -1.385 | 25.79 | 0.30415 | 3997 P  | -1.022 | 49.48 | 0.81576 | 11332 |
| Kif11         | A_52_P177802 | AK050778     | kinesin family member 11                     | -1.385 | 42.28 | 0.38628 | 5855 M  | -1.013 | 49.48 | 0.82502 | 11417 |
| Pard6b        | A_52_P37123  | BC025147     | par-6 (partitioning defective 6) homolog t   | -1.385 | 25.79 | 0.30035 | 3863 P  | 1.079  | 22.1  | 0.42379 | 7763  |
| Ppm1b         | A_51_P140541 | BC090963     | protein phosphatase 1B, magnesium dep        | -1.385 | 20.94 | 0.24754 | 2749 P  | 1.188  | 4.63  | 0.06464 | 2272  |
| Prkd2         | A_51_P499441 | NM_178900    | protein kinase D2                            | -1.387 | 45.92 | 0.49512 | 9433 P  | 1.015  | 40.63 | 0.73659 | 10647 |
| Tmem16a       | A_51_P168894 | NM_178642    | transmembrane protein 16A                    | -1.387 | 49.93 | 0.5441  | 11164 P | 1.063  | 25.31 | 0.51523 | 8721  |
| Cldn15        | A_51_P306710 | NM_021719    | claudin 15                                   | -1.389 | 53.87 | 0.57977 | 12499 P | -1.058 | 43.75 | 0.57598 | 9235  |
| D3Ucla1       | A_51_P449765 | NM_030685    | DNA segment, Chr 3, University of Califor    | -1.389 | 12.21 | 0.32365 | 3709 M  | 1.011  | 42.43 | 0.85452 | 11623 |
| Sfrs3         | A_52_P545451 | AK141440     | splicing factor, arginine/serine-rich 3 (SRp | -1.389 | 49.93 | 0.54594 | 11242 P | 1.091  | 13.58 | 0.16645 | 4325  |
| Lman1         | A_52_P652513 | NM_027400    | lectin, mannose-binding, 1                   | -1.391 | 28.61 | 0.39646 | 5288 M  | 1.011  | 42.43 | 0.89314 | 11993 |
| Osbpl1a       | A_52_P19606  | NM_207530    | oxysterol binding protein-like 1A            | -1.391 | 31.88 | 0.3356  | 4793 P  | -1.072 | 33.49 | 0.29223 | 6241  |
| Pparg         | A_51_P106799 | NM_011146    | peroxisome proliferator activated recepto    | -1.391 | 38.68 | 0.43241 | 7434 P  | 1.158  | 3.01  | 0.02124 | 901   |
| Ptma          | A_52_P249402 | NM_008972    | prothymosin alpha                            | -1.391 | 42.28 | 0.41871 | 6156 M  | 1.165  | 8.32  | 0.13739 | 3794  |
| Rfx3          | A_52_P322514 | AK041120     | regulatory factor X, 3 (influences HLA clas  | -1.391 | 53.87 | 0.62272 | 14563 P | 1.147  | 8.32  | 0.10782 | 3231  |
| AI848100      | A_52_P225722 | XM_975051    | expressed sequence AI848100                  | -1.393 | 18.5  | 0.23499 | 2429 P  | -1.015 | 49.48 | 0.90008 | 12069 |
| Habp2         | A_51_P330922 | NM_146101    | hyaluronic acid binding protein 2            | -1.393 | 75.14 | 0.66728 | 11881 M | 1.015  | 42.43 | 0.81394 | 11315 |
| Hist2h2aa1    | A_52_P64609  | NM_013549    | histone cluster 2, H2aa1                     | -1.393 | 31.88 | 0.33953 | 4337 M  | 1.07   | 16.2  | 0.20345 | 4946  |
| Zfp574        | A_51_P243207 | NM_175477    | zinc finger protein 574                      | -1.393 | 31.88 | 0.33836 | 4895 P  | 1.05   | 22.1  | 0.28362 | 6126  |
| AU024582      | A_52_P165001 | NM_153125    | expressed sequence AU024582                  | -1.395 | 38.68 | 0.3981  | 6461 P  | 1.115  | 8.32  | 0.06662 | 2336  |
| AW822216      | A_52_P286002 | NM_178884    | expressed sequence AW822216                  | -1.395 | 28.61 | 0.31417 | 4231 P  | 1.097  | 16.2  | 0.30967 | 6439  |
| Fhl1          | A_51_P335000 | NM_001077361 | four and a half LIM domains 1                | -1.395 | 23.47 | 0.36739 | 4674 M  | -1.147 | 13.58 | 0.23691 | 5446  |
| Dnalc4        | A_51_P185846 | NM_017470    | dynein, axonemal, light chain 4              | -1.397 | 35.45 | 0.39458 | 6342 P  | 1.068  | 19.02 | 0.29307 | 6256  |
| Dnmt3a        | A_52_P169048 | NM_007872    | DNA methyltransferase 3A                     | -1.397 | 18.5  | 0.24333 | 2617 P  | -1.116 | 9.71  | 0.09522 | 3006  |
| Son           | A_52_P158782 | AK034390     | Son cell proliferation protein               | -1.397 | 28.61 | 0.31487 | 4249 P  | 1.116  | 6.98  | 0.05502 | 2009  |
| Srprb         | A_51_P190262 | NM_009275    | signal recognition particle receptor, B sub  | -1.397 | 31.88 | 0.36223 | 5448 P  | 1.054  | 19.02 | 0.2358  | 5428  |
| Zfp148        | A_52_P201972 | AK037342     | zinc finger protein 148                      | -1.397 | 38.68 | 0.43241 | 7424 P  | -1.192 | 2.53  | 0.05449 | 1992  |
| 1110007M04Rik | A_52_P325265 | NM_026742    | RIKEN cDNA 1110007M04 gene                   | -1.399 | 35.45 | 0.38885 | 6154 P  | 1.017  | 40.63 | 0.73537 | 10636 |
| Cdca3         | A_51_P127195 | NM_013538    | cell division cycle associated 3             | -1.399 | 65.79 | 0.74659 | 20911 P | -1.003 | 49.48 | 0.94392 | 12520 |
| Nde1          | A_51_P438909 | NM_023317    | nuclear distribution gene E homolog 1 (A     | -1.399 | 23.47 | 0.27669 | 3353 P  | -1.128 | 3.82  | 0.05056 | 1869  |
| Nptx1         | A_52_P109393 | NM_008730    | neuronal pentraxin 1                         | -1.399 | 53.87 | 0.64073 | 12401 M | 1.094  | 11.33 | 0.1399  | 3848  |
| Sgol1         | A_51_P487999 | NM_028232    | shugoshin-like 1 (S. pombe)                  | -1.399 | 61.79 | 0.70562 | 18697 P | -1.045 | 42.43 | 0.36832 | 7142  |
| Actn1         | A_51_P347862 | NM_134156    | actinin, alpha 1                             | -1.401 | 42.28 | 0.46785 | 8467 P  | 1.014  | 40.63 | 0.76529 | 10895 |
| Emilin1       | A_51_P222359 | NM_133918    | elastin microfibril interfacier 1            | -1.401 | 18.5  | 0.24021 | 2542 P  | 1.06   | 16.2  | 0.19966 | 4896  |
| Peci          | A_51_P394665 | NM_011868    | peroxisomal delta3, delta2-enoyl-Coenzym     | -1.401 | 12.21 | 0.19856 | 1932 P  | -1.095 | 25.31 | 0.27    | 5959  |
| Sec14l2       | A_52_P488427 | NM_144520    | SEC14-like 2 (S. cerevisiae)                 | -1.401 | 49.93 | 0.54946 | 11403 P | -1.036 | 43.75 | 0.41266 | 7645  |
| Carhsp1       | A_52_P174386 | NM_025821    | calcium regulated heat stable protein 1      | -1.403 | 45.92 | 0.50315 | 9802 P  | 1.004  | 42.43 | 0.96023 | 12661 |
| Hars          | A_52_P454361 | AK077437     | histidyl-tRNA synthetase                     | -1.403 | 18.5  | 0.23874 | 2528 P  | 1.042  | 30.75 | 0.49432 | 8493  |

|               |              |              |                                              |        |       |         |         |        |       |         |       |
|---------------|--------------|--------------|----------------------------------------------|--------|-------|---------|---------|--------|-------|---------|-------|
| Itih2         | A_51_P196726 | NM_010582    | inter-alpha trypsin inhibitor, heavy chain 1 | -1.403 | 28.61 | 0.32127 | 4413 P  | 1.033  | 33.49 | 0.51304 | 8698  |
| Plcg2         | A_51_P279163 | NM_172285    | phospholipase C, gamma 2                     | -1.403 | 57.76 | 0.67728 | 17343 P | -1.056 | 38.4  | 0.32015 | 6567  |
| Ap3s2         | A_52_P584236 | NM_009682    | adaptor-related protein complex 3, sigma     | -1.404 | 18.5  | 0.24342 | 2629 P  | 1.11   | 8.32  | 0.07141 | 2419  |
| Serpina1b     | A_52_P324042 | BC037008     | serine (or cysteine) preptidase inhibitor, c | -1.404 | 45.92 | 0.52089 | 10376 P | -1.028 | 46.3  | 0.55241 | 9050  |
| Socs1         | A_51_P279606 | NM_009896    | suppressor of cytokine signaling 1           | -1.404 | 25.79 | 0.28777 | 3566 P  | 1.037  | 30.75 | 0.51568 | 8724  |
| Creb3l2       | A_52_P343856 | NM_178661    | cAMP responsive element binding protein      | -1.406 | 42.28 | 0.46893 | 8484 P  | 1.025  | 38.4  | 0.78055 | 10989 |
| Daxx          | A_51_P412835 | NM_007829    | Fas death domain-associated protein          | -1.406 | 25.79 | 0.29875 | 3800 P  | 1.152  | 3.82  | 0.03252 | 1279  |
| Zfp282        | A_52_P395381 | AK081854     | zinc finger protein 282                      | -1.406 | 38.68 | 0.3991  | 6494 M  | -1.075 | 28.13 | 0.20535 | 4976  |
| Arnt          | A_52_P84015  | AK037762     | aryl hydrocarbon receptor nuclear transloc   | -1.408 | 31.88 | 0.35766 | 5353 M  | -1.131 | 3.82  | 0.05066 | 1872  |
| Ccr1l         | A_52_P153291 | NM_145700    | chemokine (C-C motif) receptor-like 1        | -1.408 | 38.68 | 0.40939 | 6500 M  | 1.029  | 33.49 | 0.54853 | 9006  |
| Nbl1          | A_51_P244492 | NM_008675    | neuroblastoma, suppression of tumorigene     | -1.408 | 45.92 | 0.49168 | 9298 P  | 1.05   | 25.31 | 0.32705 | 6642  |
| B4galt5       | A_51_P324535 | NM_019835    | UDP-Gal:betaGlcNAc beta 1,4-galactosyltr     | -1.41  | 23.47 | 0.27445 | 3298 P  | 1.093  | 9.71  | 0.09788 | 3063  |
| Rbm6          | A_52_P298198 | AK029954     | RNA binding motif protein 6                  | -1.41  |       | 0.53923 | 8573 A  | 1.143  | 16.2  | 0.44278 | 7943  |
| Sh2d4a        | A_51_P454196 | AK008803     | SH2 domain containing 4A                     | -1.41  | 65.79 | 0.78314 | 22947 P | 1.015  | 42.43 | 0.78639 | 11061 |
| Ucn3          | A_51_P342327 | NM_031250    | urocortin 3                                  | -1.41  | 9.39  | 0.22632 | 2166 P  | -1.386 | 0.66  | 0.03744 | 1426  |
| Wnt3a         | A_51_P210970 | NM_009522    | wingless-related MMTV integration site 3     | -1.41  |       | 0.66333 | 8986 A  | 1.099  | 8.32  | 0.07057 | 2410  |
| Adipor1       | A_52_P522097 | NM_028320    | adiponectin receptor 1                       | -1.412 | 10.84 | 0.18422 | 1690 P  | 1.001  | 42.43 | 0.98727 | 12956 |
| St5           | A_51_P167746 | NM_001001326 | suppression of tumorigenicity 5              | -1.412 | 25.79 | 0.29726 | 3748 P  | -1.078 | 40.63 | 0.48521 | 8384  |
| Lgals2        | A_52_P563375 | NM_025622    | lectin, galactose-binding, soluble 2         | -1.414 | 69.29 | 0.95228 | 33020 P | -1.01  | 49.48 | 0.8894  | 11957 |
| Rbm14         | A_51_P116616 | NM_019869    | RNA binding motif protein 14                 | -1.416 | 31.88 | 0.42597 | 6002 M  | 1.084  | 13.58 | 0.1871  | 4685  |
| Wdhd1         | A_52_P655890 | NM_172598    | WD repeat and HMG-box DNA binding pr         | -1.416 | 28.61 | 0.31861 | 4348 P  | 1.035  | 30.75 | 0.48722 | 8412  |
| Cckar         | A_51_P307741 | NM_009827    | cholecystokinin A receptor                   | -1.418 | 23.47 | 0.31374 | 4070 P  | -1.145 | 3.01  | 0.03732 | 1424  |
| Mta2          | A_51_P164207 | NM_011842    | metastasis-associated gene family, memb      | -1.418 | 16.01 | 0.23614 | 2306 P  | 1.082  | 11.33 | 0.12616 | 3636  |
| Slc7a6        | A_52_P462071 | NM_178798    | solute carrier family 7 (cationic amino aci  | -1.418 | 25.79 | 0.30258 | 3935 P  | 1.013  | 42.43 | 0.79861 | 11167 |
| Zdhhc3        | A_51_P258435 | NM_026917    | zinc finger, DHHC domain containing 3        | -1.418 | 10.84 | 0.1825  | 1669 P  | -1.02  | 49.48 | 0.78997 | 11089 |
| 2810037C14Rik | A_52_P453498 | NM_026034    | armadillo repeat containing 10               | -1.42  | 13.61 | 0.20375 | 1986 P  | 1.031  | 38.4  | 0.78134 | 11003 |
| Mapk3         | A_51_P158628 | NM_011952    | mitogen activated protein kinase 3           | -1.42  | 16.01 | 0.22227 | 2236 P  | 1.119  | 5.75  | 0.04276 | 1607  |
| 2610027C15Rik | A_52_P678056 | NM_172145    | RIKEN cDNA 2610027C15 gene                   | -1.422 | 28.61 | 0.32598 | 4533 P  | -1.183 | 1.32  | 0.02317 | 976   |
| A130010J15Rik | A_51_P414320 | NM_181048    | RIKEN cDNA A130010J15 gene                   | -1.422 | 13.61 | 0.19603 | 1873 P  | -1.247 | 1.18  | 0.03182 | 1254  |
| Car12         | A_52_P646858 | NM_178396    | carbonic anhydrase 12                        | -1.422 | 72.2  | 0.72148 | 17049 M | 1.123  | 13.58 | 0.30236 | 6342  |
| Rab26         | A_52_P448870 | AK043912     | RAB26, member RAS oncogene family            | -1.422 | 12.21 | 0.1878  | 1775 P  | 1.076  | 13.58 | 0.12661 | 3642  |
| H2-T22        | A_51_P432544 | NM_010397    | histocompatibility 2, T region locus 22      | -1.425 | 18.5  | 0.23595 | 2452 P  | -1.02  | 49    | 0.71928 | 10487 |
| Rras2         | A_51_P112912 | NM_025846    | related RAS viral (r-ras) oncogene homolo    | -1.425 | 18.5  | 0.2301  | 2351 P  | -1.378 | 0.51  | 0.00989 | 373   |
| BC025462      | A_51_P441843 | NM_145946    | cDNA sequence BC025462                       | -1.429 | 38.68 | 0.41841 | 6971 P  | -1.353 | 0.51  | 0.00584 | 74    |
| Grip1         | A_51_P494744 | NM_028736    | glutamate receptor interacting protein 1     | -1.429 | 18.5  | 0.22953 | 2339 P  | 1.24   | 2.04  | 0.01925 | 806   |
| Slc31a2       | A_51_P416137 | NM_025286    | solute carrier family 31, member 2           | -1.429 | 18.5  | 0.24155 | 2573 P  | 1.033  | 30.75 | 0.44605 | 7975  |
| Ugcg          | A_51_P332717 | NM_011673    | UDP-glucose ceramide glucosyltransferase     | -1.429 | 31.88 | 0.36597 | 5516 P  | 1.05   | 25.31 | 0.38157 | 7291  |
| Crabp1        | A_52_P185907 | NM_013496    | cellular retinoic acid binding protein I     | -1.431 | 69.29 | 0.82276 | 25592 P | -1.015 | 49.48 | 0.85206 | 11609 |
| Ggt1          | A_51_P468073 | NM_008116    | gamma-glutamyltransferase 1                  | -1.431 | 25.79 | 0.28781 | 3575 P  | -1.051 | 42.43 | 0.38172 | 7302  |
| Slc14a1       | A_51_P343689 | NM_028122    | solute carrier family 14 (urea transporter)  | -1.431 | 49.93 | 0.58129 | 12620 P | -1.042 | 43.75 | 0.46538 | 8163  |
| Tpm2          | A_52_P315976 | NM_009416    | tropomyosin 2, beta                          | -1.431 | 45.92 | 0.50336 | 9816 P  | -1.165 | 2.53  | 0.04314 | 1616  |
| Usp54         | A_51_P351883 | NM_030180    | ubiquitin specific peptidase 54              | -1.431 | 18.5  | 0.2301  | 2364 P  | 1.106  | 11.33 | 0.16229 | 4263  |
| Rab3a         | A_52_P276397 | NM_009001    | RAB3A, member RAS oncogene family            | -1.435 | 38.68 | 0.48031 | 7330 M  | -1.044 | 45.05 | 0.59894 | 9442  |
| Foxa1         | A_51_P417643 | NM_008259    | forkhead box A1                              | -1.437 | 28.61 | 0.33591 | 4807 M  | 1.094  | 9.71  | 0.09478 | 2996  |
| 6030408C04Rik | A_51_P461716 | NM_001015099 | RIKEN cDNA 6030408C04 gene                   | -1.439 | 18.5  | 0.23776 | 2503 P  | -1.114 | 13.58 | 0.14794 | 4003  |
| Tbcd          | A_51_P392244 | NM_029878    | tubulin-specific chaperone d                 | -1.439 | 23.47 | 0.28068 | 3435 P  | -1.013 | 49.48 | 0.86753 | 11735 |
| Trib2         | A_51_P103819 | NM_144551    | tribbles homolog 2 (Drosophila)              | -1.439 | 57.76 | 0.65228 | 16186 P | -1.01  | 49.48 | 0.89562 | 12015 |
| 4121402D02Rik | A_51_P380249 | NM_028722    | RIKEN cDNA 4121402D02 gene                   | -1.441 | 13.61 | 0.19322 | 1854 P  | 1.064  | 25.31 | 0.48303 | 8360  |
| Pkn2          | A_52_P290629 | AK083425     | protein kinase N2                            | -1.441 | 16.01 | 0.21984 | 2202 P  | 1.069  | 22.1  | 0.39615 | 7478  |
| Traf3         | A_51_P469411 | NM_011632    | Tnf receptor-associated factor 3             | -1.441 | 35.45 | 0.39458 | 6362 P  | -1.12  | 16.2  | 0.20155 | 4924  |
| Galk1         | A_51_P243304 | NM_016905    | galactokinase 1                              | -1.443 | 53.87 | 0.62859 | 14951 P | 1.049  | 22.1  | 0.26921 | 5937  |
| Itga6         | A_52_P324934 | AK045391     | integrin alpha 6                             | -1.443 | 35.45 | 0.37681 | 5813 P  | -1.194 | 1.1   | 0.01672 | 719   |
| Lrrc16        | A_52_P635250 | AK051570     | leucine rich repeat containing 16            | -1.443 | 20.94 | 0.24363 | 2652 P  | 1.129  | 9.71  | 0.14566 | 3956  |

|               |               |              |                                              |        |       |         |         |        |       |         |       |
|---------------|---------------|--------------|----------------------------------------------|--------|-------|---------|---------|--------|-------|---------|-------|
| Edg7          | A_51_P134452  | NM_022983    | endothelial differentiation, lysophosphati   | -1.445 |       | 0.63339 | 9910 A  | 1.06   | 19.02 | 0.25595 | 5744  |
| Prkca         | A_51_P118012  | NM_011101    | protein kinase C, alpha                      | -1.445 | 23.47 | 0.28619 | 3535 P  | 1.268  | 1.32  | 0.01345 | 573   |
| Pyy           | A_52_P366462  | NM_145435    | peptide YY                                   | -1.445 | 18.5  | 0.32666 | 3760 M  | -1.04  | 48.39 | 0.80583 | 11234 |
| 9530068E07Rik | A_52_P265762  | NM_153117    | RIKEN cDNA 9530068E07 gene                   | -1.447 | 18.5  | 0.22555 | 2277 P  | 1.061  | 25.31 | 0.48168 | 8327  |
| Map3k1        | A_51_P402193  | NM_011945    | mitogen activated protein kinase kinase k    | -1.447 | 38.68 | 0.46984 | 7000 M  | 1.09   | 11.33 | 0.14258 | 3897  |
| Shc2          | A_52_P104108  | BC059866     | src homology 2 domain-containing transfo     | -1.447 | 23.47 | 0.2752  | 3316 P  | -1.261 | 0.51  | 0.01059 | 407   |
| Tbl2          | A_52_P109304  | NM_013763    | transducin (beta)-like 2                     | -1.447 | 16.01 | 0.21534 | 2133 P  | 1.133  | 9.71  | 0.14583 | 3961  |
| Tcp11         | A_52_P75127   | NM_013687    | t-complex protein 11                         | -1.447 | 42.28 | 0.46248 | 8305 P  | 1.06   | 25.31 | 0.44567 | 7970  |
| Ube2d1        | A_52_P546459  | NM_145420    | ubiquitin-conjugating enzyme E2D 1, UBC      | -1.447 | 12.21 | 0.18707 | 1763 P  | -1.42  | 0.51  | 0.00584 | 30    |
| AK129302      | A_52_P1108518 | AK086554     | cDNA sequence AK129302                       | -1.449 |       | 0.41761 | 6130 A  | -1.137 | 9.71  | 0.15517 | 4139  |
| Elmo2         | A_51_P199382  | NM_207705    | engulfment and cell motility 2, ced-12 ho    | -1.449 | 35.45 | 0.38521 | 6047 P  | 1.087  | 16.2  | 0.27    | 5956  |
| Onecut3       | A_52_P474152  | NM_139226    | one cut domain, family member 3              | -1.449 |       | 0.58316 | 12112 A | 1.088  | 11.33 | 0.11364 | 3352  |
| Efna2         | A_51_P352850  | NM_007909    | ephrin A2                                    | -1.453 | 25.79 | 0.2978  | 3761 P  | -1.006 | 49.48 | 0.91844 | 12251 |
| Pcsk2         | A_51_P134045  | NM_008792    | proprotein convertase subtilisin/kexin typ   | -1.453 | 20.94 | 0.33242 | 3921 M  | -1.283 | 1.18  | 0.04067 | 1547  |
| Dhx34         | A_51_P342813  | NM_027883    | DEAH (Asp-Glu-Ala-His) box polypeptide       | -1.456 | 13.61 | 0.18905 | 1784 P  | 1.02   | 38.4  | 0.72866 | 10559 |
| Pole          | A_51_P155482  | NM_011132    | polymerase (DNA directed), epsilon           | -1.456 | 35.45 | 0.30777 | 3758 M  | 1.04   | 28.13 | 0.36745 | 7132  |
| Slc35e4       | A_51_P268934  | NM_153142    | solute carrier family 35, member E4          | -1.456 | 20.94 | 0.24845 | 2765 P  | -1.05  | 38.4  | 0.27959 | 6090  |
| Hao1          | A_51_P318262  | NM_010403    | hydroxyacid oxidase 1, liver                 | -1.458 | 16.01 | 0.22315 | 2248 P  | 1.086  | 16.2  | 0.23133 | 5370  |
| Map2k1ip1     | A_51_P173555  | NM_019920    | mitogen-activated protein kinase kinase 1    | -1.458 | 72.2  | 0.58498 | 11608 P | -1.226 | 13.58 | 0.35987 | 7015  |
| Phactr4       | A_51_P323221  | NM_175306    | phosphatase and actin regulator 4            | -1.458 | 23.47 | 0.28068 | 3436 P  | 1.022  | 42.43 | 0.87369 | 11797 |
| Sec61a1       | A_52_P489729  | NM_016906    | Sec61 alpha 1 subunit (S. cerevisiae)        | -1.458 | 10.84 | 0.24282 | 2324 M  | -1.242 | 0.51  | 0.00756 | 279   |
| Slc22a18      | A_51_P165882  | NM_001042760 | solute carrier family 22 (organic cation tra | -1.458 | 45.92 | 0.52692 | 10601 P | -1.09  | 25.31 | 0.24091 | 5511  |
| Mta1          | A_51_P423030  | NM_054081    | metastasis associated 1                      | -1.46  | 31.88 | 0.36169 | 5436 P  | 1.047  | 25.31 | 0.32039 | 6569  |
| Agtr2         | A_51_P437978  | NM_007429    | angiotensin II receptor, type 2              | -1.462 |       | 0.62716 | 8069 A  | 1.051  | 22.1  | 0.25345 | 5706  |
| Ets2          | A_52_P658122  | NM_011809    | E26 avian leukemia oncogene 2, 3' domai      | -1.462 | 18.5  | 0.32161 | 3669 M  | 1.084  | 19.02 | 0.39637 | 7482  |
| Ctse          | A_51_P217906  | NM_007799    | cathepsin E                                  | -1.464 | 72.2  | 0.87701 | 29403 P | -1.143 | 2.53  | 0.03244 | 1278  |
| Klf12         | A_52_P617636  | NM_010636    | Kruppel-like factor 12                       | -1.464 | 23.47 | 0.2694  | 3146 P  | 1.027  | 33.49 | 0.54146 | 8957  |
| P4hb          | A_51_P311990  | NM_011032    | prolyl 4-hydroxylase, beta polypeptide       | -1.464 | 42.28 | 0.52785 | 8641 M  | 1.075  | 22.1  | 0.38555 | 7343  |
| Tap1          | A_51_P100327  | NM_013683    | transporter 1, ATP-binding cassette, sub-f   | -1.464 | 12.21 | 0.18646 | 1750 P  | 1.014  | 42.43 | 0.7827  | 11023 |
| Rab10         | A_52_P647162  | AK045299     | RAB10, member RAS oncogene family            | -1.466 | 53.87 | 0.62996 | 15119 P | 1.261  | 1.17  | 0.00932 | 341   |
| Esrrg         | A_51_P224192  | NM_011935    | estrogen-related receptor gamma              | -1.468 | 31.88 | 0.3543  | 5225 P  | 1.089  | 16.2  | 0.2757  | 6036  |
| Igfbp3        | A_52_P851352  | AK045003     | insulin-like growth factor binding protein   | -1.468 | 16.01 | 0.21773 | 2169 M  | 1.171  | 3.82  | 0.03953 | 1502  |
| Cks2          | A_51_P462249  | NM_025415    | CDC28 protein kinase regulatory subunit      | -1.473 | 31.88 | 0.37271 | 5676 P  | 1.008  | 42.43 | 0.86426 | 11720 |
| Lmnb1         | A_51_P120717  | NM_010721    | lamin B1                                     | -1.473 | 35.45 | 0.37749 | 5851 P  | 1.113  | 11.33 | 0.1683  | 4353  |
| 2410081M15Rik | A_51_P435817  | NM_028603    | RIKEN cDNA 2410081M15 gene                   | -1.475 | 35.45 | 0.38483 | 6028 P  | 1.088  | 9.71  | 0.09438 | 2984  |
| Cdh4          | A_52_P402897  | AK038529     | cadherin 4                                   | -1.475 | 49.93 | 0.54875 | 11377 P | -1.078 | 16.2  | 0.10878 | 3240  |
| Rod1          | A_51_P310040  | NM_144904    | ROD1 regulator of differentiation 1 (S. po   | -1.475 | 28.61 | 0.2777  | 3107 P  | -1.364 | 0.51  | 0.01238 | 501   |
| Trim59        | A_51_P275808  | NM_025863    | tripartite motif-containing 59               | -1.475 | 25.79 | 0.29875 | 3814 P  | -1.028 | 47.43 | 0.66916 | 10043 |
| Gp2           | A_51_P268391  | NM_025989    | glycoprotein 2 (zymogen granule membra       | -1.477 | 23.47 | 0.39447 | 5525 M  | -1.373 | 0.51  | 0.0109  | 424   |
| Ins2          | A_51_P389597  | NM_008387    | insulin II                                   | -1.477 | 72.2  | 0.88596 | 21833 M | 1.04   | 30.75 | 0.52251 | 8771  |
| S100a14       | A_51_P419226  | NM_025393    | S100 calcium binding protein A14             | -1.477 | 72.2  | 0.84605 | 27494 P | -1.176 | 1.58  | 0.02439 | 1009  |
| B4galt2       | A_51_P496685  | NM_017377    | UDP-Gal:betaGlcNAc beta 1,4- galactosylt     | -1.479 | 18.5  | 0.22953 | 2338 P  | 1.045  | 25.31 | 0.36973 | 7160  |
| Isg20         | A_52_P448253  | NM_020583    | interferon-stimulated protein                | -1.481 | 38.68 | 0.41521 | 6904 P  | -1.145 | 3.46  | 0.04586 | 1720  |
| Slc38a3       | A_51_P139030  | NM_023805    | solute carrier family 38, member 3           | -1.481 | 42.28 | 0.47476 | 8771 P  | -1.009 | 49.48 | 0.87183 | 11781 |
| Cuedc1        | A_52_P479647  | NM_198013    | CUE domain containing 1                      | -1.484 | 16.01 | 0.21903 | 2191 P  | -1.134 | 11.33 | 0.17361 | 4436  |
| Pex11c        | A_52_P573970  | BC024096     | peroxisomal biogenesis factor 11c            | -1.484 | 38.68 | 0.41798 | 6962 P  | 1.038  | 30.75 | 0.47083 | 8212  |
| Pim1          | A_52_P530291  | NM_008842    | proviral integration site 1                  | -1.486 | 42.28 | 0.46016 | 8222 P  | -1.251 | 0.56  | 0.012   | 485   |
| Chrm3         | A_51_P247853  | NM_033269    | cholinergic receptor, muscarinic 3, cardia   | -1.488 | 5.15  | 0.12854 | 1012 P  | 1.001  | 42.43 | 0.98176 | 12877 |
| Grtp1         | A_51_P109144  | NM_025768    | GH regulated TBC protein 1                   | -1.488 | 6.91  | 0.13645 | 1083 P  | 1.003  | 42.43 | 0.95069 | 12593 |
| Pnliprp2      | A_51_P314669  | NM_011128    | pancreatic lipase-related protein 2          | -1.488 | 16.01 | 0.33953 | 4333 M  | 1.02   | 40.63 | 0.7133  | 9594  |
| Shc1          | A_52_P384250  | NM_011368    | src homology 2 domain-containing transfo     | -1.488 | 16.01 | 0.21628 | 2158 P  | 1.053  | 22.1  | 0.27494 | 6026  |
| Spr           | A_51_P163958  | NM_011467    | sepiapterin reductase                        | -1.488 | 16.01 | 0.21115 | 2080 P  | 1.057  | 16.2  | 0.20441 | 4957  |
| Ush2a         | A_52_P649547  | NM_021408    | Usher syndrome 2A (autosomal recessive       | -1.488 | 49.93 | 0.58078 | 12538 P | -1.131 | 6.98  | 0.09289 | 2960  |



|               |              |              |                                                           |        |       |         |         |        |       |         |       |
|---------------|--------------|--------------|-----------------------------------------------------------|--------|-------|---------|---------|--------|-------|---------|-------|
| D11Ertd18e    | A_51_P430585 | NM_026740    | solute carrier family 46, member 1                        | -1.49  | 18.5  | 0.23776 | 2502 P  | -1.022 | 47.92 | 0.65059 | 9892  |
| Flnb          | A_52_P222350 | XM_990154    | filamin, beta                                             | -1.49  | 20.94 | 0.24858 | 2769 P  | 1.138  | 6.98  | 0.07798 | 2605  |
| Cyb561        | A_52_P681787 | NM_007805    | cytochrome b-561                                          | -1.493 | 13.61 | 0.19135 | 1831 P  | -1.21  | 1.58  | 0.03718 | 1415  |
| Taf1c         | A_51_P411355 | NM_021441    | TATA box binding protein (Tbp)-associated                 | -1.493 | 31.88 | 0.34533 | 5014 P  | -1.037 | 44.4  | 0.46495 | 8159  |
| Twsg1         | A_52_P451378 | NM_023053    | twisted gastrulation homolog 1 (Drosophila)               | -1.493 | 8.15  | 0.24748 | 2320 M  | 1.053  | 33.49 | 0.72851 | 10555 |
| Ccnd2         | A_52_P514391 | NM_009829    | cyclin D2                                                 | -1.495 | 25.79 | 0.30959 | 4153 P  | -1.15  | 2.04  | 0.03115 | 1231  |
| Dicer1        | A_51_P333060 | NM_148948    | Dicer1, Dcr-1 homolog (Drosophila)                        | -1.495 | 8.15  | 0.14625 | 1204 P  | 1.006  | 42.43 | 0.92893 | 12378 |
| Fgfr1op       | A_52_P147778 | NM_201230    | Fgfr1 oncogene partner                                    | -1.495 | 13.61 | 0.19661 | 1883 P  | 1.055  | 22.1  | 0.32472 | 6614  |
| Ptbp2         | A_52_P593110 | AK015056     | polypyrimidine tract binding protein 2                    | -1.495 | 31.88 | 0.34574 | 5023 P  | 1.076  | 13.58 | 0.15575 | 4145  |
| Slc20a2       | A_52_P229044 | NM_011394    | solute carrier family 20, member 2                        | -1.495 | 10.84 | 0.17066 | 1497 P  | 1.001  | 42.43 | 0.99494 | 13013 |
| BC024868      | A_51_P127456 | BC070402     | cDNA sequence BC024868                                    | -1.497 | 16.01 | 0.2154  | 2136 P  | 1.056  | 22.1  | 0.31428 | 6517  |
| Myc           | A_51_P102096 | NM_010849    | myelocytomatosis oncogene                                 | -1.499 | 35.45 | 0.29583 | 3598 P  | 1.003  | 42.43 | 0.95315 | 12605 |
| Ddx19b        | A_51_P262144 | NM_172284    | DEAD (Asp-Glu-Ala-Asp) box polypeptide                    | -1.506 | 4.65  | 0.1859  | 1565 M  | 1.001  | 42.43 | 0.98495 | 12931 |
| Gbp2          | A_51_P203955 | NM_010260    | guanylate nucleotide binding protein 2                    | -1.506 | 38.68 | 0.4443  | 7781 P  | -1.105 | 11.33 | 0.09767 | 3057  |
| Il2ra         | A_51_P118945 | AF054581     | interleukin 2 receptor, alpha chain                       | -1.508 |       | 0.59032 | 10020 A | 1.081  | 16.2  | 0.2575  | 5772  |
| Dnajc1        | A_52_P690892 | AK030790     |                                                           | -1.511 | 18.5  | 0.22953 | 2336 P  | -1.225 | 3.82  | 0.15034 | 4042  |
| Hdlbp         | A_52_P303085 | NM_133808    | high density lipoprotein (HDL) binding protein            | -1.511 | 6.57  | 0.12849 | 1008 P  | 1.146  | 8.32  | 0.11418 | 3372  |
| Rnf144        | A_52_P662591 | NM_080563    | ring finger protein 144                                   | -1.511 |       | 0.50226 | 6605 A  | -1.208 | 0.92  | 0.01571 | 674   |
| Traf5         | A_51_P473154 | NM_011633    | Tnf receptor-associated factor 5                          | -1.511 | 23.47 | 0.28891 | 3592 P  | 1.017  | 38.4  | 0.69206 | 10256 |
| Anxa13        | A_52_P662711 | NM_027211    | annexin A13                                               | -1.513 | 72.2  | 0.86243 | 28360 P | 1.063  | 19.02 | 0.21889 | 5187  |
| Ncoa3         | A_52_P477759 | NM_008679    | nuclear receptor coactivator 3                            | -1.517 | 13.61 | 0.19761 | 1923 P  | -1.013 | 49.48 | 0.88079 | 11868 |
| Ga17          | A_51_P141308 | NM_145380    | dendritic cell protein GA17                               | -1.52  | 25.79 | 0.37009 | 4711 M  | -1.03  | 47.92 | 0.7128  | 10426 |
| Prdx4         | A_52_P313861 | AK165551     | peroxiredoxin 4                                           | -1.52  | 16.01 | 0.21816 | 2175 P  | 1.058  | 19.02 | 0.23887 | 5470  |
| Prkaa1        | A_52_P173344 | NM_001013367 | protein kinase, AMP-activated, alpha 1 catalytic          | -1.52  | 16.01 | 0.20291 | 1975 P  | 1.017  | 40.63 | 0.74952 | 10783 |
| Prrxl1        | A_52_P122255 | NM_001001796 | paired related homeobox protein-like 1                    | -1.52  | 42.28 | 0.47485 | 8787 P  | 1.037  | 36.07 | 0.75138 | 10800 |
| Ampd2         | A_51_P479769 | NM_028779    | adenosine monophosphate deaminase 2                       | -1.522 | 28.61 | 0.32995 | 4669 P  | -1.022 | 48.39 | 0.66018 | 9973  |
| Ghr           | A_52_P54106  | AK034547     | growth hormone receptor                                   | -1.522 | 20.94 | 0.24428 | 2675 P  | 1.03   | 33.49 | 0.50229 | 8607  |
| Gna14         | A_51_P110323 | NM_008137    | guanine nucleotide binding protein, alpha                 | -1.522 | 28.61 | 0.3288  | 4641 P  | -1.033 | 46.3  | 0.59947 | 9443  |
| Elf3          | A_51_P480241 | NM_007921    | E74-like factor 3                                         | -1.524 | 42.28 | 0.47092 | 8587 P  | -1.13  | 6.98  | 0.09328 | 2972  |
| Cebpd         | A_51_P444447 | NM_007679    | CCAAT/enhancer binding protein (C/EBP),                   | -1.527 | 7.45  | 0.13209 | 1049 P  | 1.08   | 13.58 | 0.14481 | 3942  |
| Nr1h5         | A_51_P226664 | NM_201619    | nuclear receptor subfamily 1, group H, member             | -1.527 | 75.14 | 0.76926 | 19283 M | -1.082 | 25.31 | 0.18339 | 4635  |
| Eps8l2        | A_52_P257426 | NM_133191    | EPS8-like 2                                               | -1.529 | 9.39  | 0.14404 | 1179 P  | 1.006  | 42.43 | 0.93782 | 12460 |
| Isgf3g        | A_52_P176013 | NM_008394    | interferon dependent positive acting transmembrane        | -1.529 | 20.94 | 0.25354 | 2877 P  | 1.142  | 5.75  | 0.05139 | 1889  |
| Dctd          | A_52_P301085 | NM_178788    | dCMP deaminase                                            | -1.531 | 84.56 | 0.44375 | 5625 M  | 1.07   | 19.02 | 0.27795 | 6062  |
| Reg3a         | A_51_P267969 | NM_011259    | regenerating islet-derived 3 alpha                        | -1.531 | 69.29 | 0.8426  | 27245 P | 1.093  | 16.2  | 0.27297 | 5996  |
| 2310007D09Rik | A_51_P273556 | NM_027975    | RIKEN cDNA 2310007D09 gene                                | -1.534 | 35.45 | 0.28591 | 3283 M  | 1.186  | 6.98  | 0.1508  | 4048  |
| Slc7a2        | A_52_P77764  | NM_007514    | solute carrier family 7 (cationic amino acid transporter) | -1.534 | 42.28 | 0.47247 | 8657 P  | 1.04   | 30.75 | 0.53419 | 8881  |
| Tbc1d4        | A_52_P939390 | AK042979     | TBC1 domain family, member 4                              | -1.534 | 42.28 | 0.4726  | 8312 M  | 1.038  | 28.13 | 0.38164 | 7293  |
| Ang1          | A_51_P391159 | NM_007447    | angiogenin, ribonuclease A family, member 1               | -1.536 | 45.92 | 0.52412 | 10485 P | -1.491 | 0.51  | 0.01199 | 479   |
| Il2rg         | A_51_P456952 | NM_013563    | interleukin 2 receptor, gamma chain                       | -1.536 | 31.88 | 0.38521 | 6046 P  | -1.078 | 22.1  | 0.15934 | 4204  |
| Npas3         | A_52_P557459 | AF168769     | neuronal PAS domain protein 3                             | -1.536 | 49.93 | 0.49852 | 7001 M  | 1.115  | 8.32  | 0.06391 | 2253  |
| Pim3          | A_51_P189746 | NM_145478    | proviral integration site 3                               | -1.536 | 12.21 | 0.18354 | 1677 P  | 1.097  | 19.02 | 0.3947  | 7456  |
| Rara          | A_51_P389724 | NM_009024    | retinoic acid receptor, alpha                             | -1.536 | 18.5  | 0.24343 | 2631 P  | 1.07   | 13.58 | 0.16182 | 4251  |
| Anln          | A_51_P313896 | NM_028390    | anillin, actin binding protein (scraps homolog)           | -1.538 | 57.76 | 0.34574 | 4155 M  | -1.173 | 1.58  | 0.02707 | 1100  |
| Btg1          | A_51_P288193 | NM_007569    | B-cell translocation gene 1, anti-proliferation           | -1.538 | 18.5  | 0.29726 | 3151 M  | 1.163  | 3.82  | 0.02902 | 1165  |
| Onecut1       | A_51_P368894 | NM_008262    | one cut domain, family member 1                           | -1.538 | 8.15  | 0.13502 | 1069 P  | 1.114  | 9.71  | 0.15194 | 4063  |
| Ptpn13        | A_51_P455208 | NM_011204    | protein tyrosine phosphatase, non-receptor                | -1.538 | 28.61 | 0.33753 | 4847 P  | -1.007 | 49.48 | 0.89173 | 11981 |
| Sycn          | A_51_P434332 | NM_026716    | syncollin                                                 | -1.538 | 38.68 | 0.46111 | 6813 M  | -1.247 | 0.92  | 0.02302 | 972   |
| Ube2j1        | A_51_P257107 | NM_019586    | ubiquitin-conjugating enzyme E2, J1                       | -1.538 | 9.39  | 0.14222 | 1159 P  | 1.003  | 42.43 | 0.98495 | 12914 |
| Impdh1        | A_52_P183038 | NM_011829    | inosine 5'-phosphate dehydrogenase 1                      | -1.543 | 35.45 | 0.41915 | 6995 P  | -1.065 | 33.49 | 0.25544 | 5733  |
| H2afy3        | A_51_P487668 | NM_026230    | H2A histone family, member Y3                             | -1.546 | 16.01 | 0.21253 | 2095 P  | -1.116 | 5.75  | 0.05734 | 2074  |
| Nfs1          | A_52_P252121 | AK003786     | nitrogen fixation gene 1 (S. cerevisiae)                  | -1.546 | 8.15  | 0.13335 | 1063 M  | -1.076 | 22.1  | 0.13264 | 3724  |
| Taf5l         | A_51_P349662 | NM_133966    | TAF5-like RNA polymerase II, p300/CBP-associated          | -1.546 | 10.33 | 0.15622 | 1303 P  | -1.037 | 43.15 | 0.37012 | 7171  |

|               |              |              |                                                                        |        |       |         |         |        |       |         |       |
|---------------|--------------|--------------|------------------------------------------------------------------------|--------|-------|---------|---------|--------|-------|---------|-------|
| Pde3a         | A_51_P109060 | NM_018779    | phosphodiesterase 3A, cGMP inhibited                                   | -1.548 | 12.21 | 0.29533 | 3171 M  | -1.032 | 48.39 | 0.78083 | 10996 |
| Peg3          | A_51_P206037 | NM_008817    | paternally expressed 3                                                 | -1.548 | 23.47 | 0.28009 | 3424 P  | 1.008  | 42.43 | 0.93901 | 12470 |
| Afp           | A_51_P510891 | NM_007423    | alpha fetoprotein                                                      | -1.55  |       | 0.41673 | 6679 A  | -1.417 | 0.51  | 0.00584 | 103   |
| Slc16a1       | A_51_P397367 | NM_009196    | solute carrier family 16 (monocarboxylic acid) member 1                | -1.55  | 65.79 | 0.7596  | 21606 P | 1.022  | 38.4  | 0.7111  | 10412 |
| Stau1         | A_52_P65136  | AK041781     | stauferin (RNA binding protein) homolog 1                              | -1.55  | 28.61 | 0.32773 | 4580 P  | 1.02   | 40.63 | 0.75728 | 10843 |
| Tbx15         | A_52_P648635 | NM_011534    | T-box 15                                                               | -1.553 |       | 0.43833 | 6982 A  | 1.109  | 9.71  | 0.09767 | 3053  |
| Dtx1          | A_51_P202050 | NM_008052    | deltex 1 homolog (Drosophila)                                          | -1.555 | 45.92 | 0.55922 | 11706 P | 1.042  | 28.13 | 0.39097 | 7407  |
| Gata5         | A_51_P213260 | NM_008093    | GATA binding protein 5                                                 | -1.558 |       | 0.50463 | 6671 A  | 1.059  | 19.02 | 0.22642 | 5293  |
| Plagl1        | A_52_P532456 | BC065150     | pleiomorphic adenoma gene-like 1                                       | -1.558 | 4.65  | 0.14404 | 1112 P  | 1.105  | 9.71  | 0.08321 | 2733  |
| Ctbp2         | A_51_P315303 | NM_009980    | C-terminal binding protein 2                                           | -1.56  | 6.91  | 0.12368 | 970 P   | -1.094 | 16.2  | 0.11975 | 3490  |
| Mcm3          | A_51_P324934 | AK088142     | minichromosome maintenance deficient 3                                 | -1.56  | 42.28 | 0.47485 | 8796 P  | -1.063 | 33.49 | 0.26817 | 5919  |
| Tcf7          | A_52_P244702 | NM_009331    | transcription factor 7, T-cell specific                                | -1.56  | 57.76 | 0.6977  | 18259 P | 1.088  | 11.33 | 0.12012 | 3497  |
| Trp53bp1      | A_52_P364757 | NM_013735    | transformation related protein 53 binding protein 1                    | -1.56  | 10.84 | 0.15704 | 1309 P  | 1.097  | 16.2  | 0.35391 | 6935  |
| Clca1         | A_52_P669035 | NM_009899    | chloride channel calcium activated 1                                   | -1.562 | 45.92 | 0.51679 | 10204 P | 1.061  | 16.2  | 0.1735  | 4433  |
| Kcmf1         | A_52_P545491 | AK084157     | potassium channel modulatory factor 1                                  | -1.562 | 42.28 | 0.48769 | 9177 P  | 1.013  | 42.43 | 0.80093 | 11184 |
| Sf3b4         | A_52_P253665 | XM_001001232 | splicing factor 3b, subunit 4                                          | -1.562 |       | 0.56811 | 6723 A  | 1.074  | 13.58 | 0.17007 | 4383  |
| Cyp4b1        | A_51_P118704 | NM_007823    | cytochrome P450, family 4, subfamily b, polypeptide 1                  | -1.565 | 23.47 | 0.28421 | 3515 P  | -1.059 | 38.4  | 0.35533 | 6962  |
| Stat5b        | A_52_P53698  | NM_011489    | signal transducer and activator of transcription 5B                    | -1.567 | 28.61 | 0.39711 | 5312 M  | 1.146  | 8.32  | 0.12478 | 3590  |
| Crlf3         | A_52_P116024 | NM_018776    | cytokine receptor-like factor 3                                        | -1.57  | 13.61 | 0.18564 | 1718 P  | -1.01  | 49.48 | 0.83055 | 11460 |
| Nav1          | A_51_P196087 | NM_173437    | neuron navigator 1                                                     | -1.57  | 10.84 | 0.16388 | 1414 P  | -1.319 | 0.51  | 0.01026 | 391   |
| Ndfip2        | A_52_P141786 | NM_029561    | Nedd4 family interacting protein 2                                     | -1.57  | 8.15  | 0.13206 | 1046 P  | -1.087 | 22.1  | 0.17087 | 4399  |
| Tcf7l2        | A_52_P566741 | NM_009333    | transcription factor 7-like 2, T-cell specific                         | -1.572 | 20.94 | 0.26726 | 3103 P  | 1.048  | 25.31 | 0.35274 | 6914  |
| Ttc7          | A_51_P103209 | NM_028639    | tetratricopeptide repeat domain 7                                      | -1.572 | 18.5  | 0.24137 | 2563 P  | -1.063 | 36.07 | 0.29062 | 6215  |
| Acta2         | A_52_P210078 | NM_007392    | actin, alpha 2, smooth muscle, aorta                                   | -1.575 | 42.28 | 0.47357 | 8733 P  | -1.174 | 3.82  | 0.09631 | 3023  |
| Aqp12         | A_52_P240693 | NM_177587    | aquaporin 12                                                           | -1.575 | 31.88 | 0.35723 | 5339 P  | -1.105 | 11.33 | 0.09903 | 3086  |
| AW112037      | A_52_P676461 | AK037065     | expressed sequence AW112037                                            | -1.575 | 12.21 | 0.17312 | 1535 P  | 1.18   | 2.53  | 0.01587 | 686   |
| Top2a         | A_51_P252157 | NM_011623    | topoisomerase (DNA) II alpha                                           | -1.575 | 42.28 | 0.50904 | 9912 M  | -2.031 | 0     | 0.00584 | 21    |
| Fras1         | A_51_P383270 | NM_175473    | Fraser syndrome 1 homolog (human)                                      | -1.577 | 49.93 | 0.57184 | 12111 P | -1.123 | 3.82  | 0.04798 | 1792  |
| Jak3          | A_51_P288406 | NM_010589    | insulin-like 3                                                         | -1.577 | 20.94 | 0.25495 | 2920 P  | -1.045 | 46.85 | 0.74918 | 10782 |
| Neurog2       | A_51_P370615 | NM_009718    | neurogenin 2                                                           | -1.577 |       | 0.54623 | 7614 A  | 1.11   | 6.98  | 0.05792 | 2084  |
| Pcyt1b        | A_52_P160005 | NM_211138    | phosphate cytidylyltransferase 1, choline, cytosolic                   | -1.577 | 20.94 | 0.25583 | 2944 P  | 1.115  | 6.98  | 0.06202 | 2195  |
| Arhgdig       | A_52_P50325  | NM_008113    | Rho GDP dissociation inhibitor (GDI) gamma                             | -1.58  | 13.61 | 0.19042 | 1813 P  | 1.064  | 19.02 | 0.3034  | 6360  |
| Ret           | A_51_P324191 | NM_009050    | ret proto-oncogene                                                     | -1.58  | 45.92 | 0.51739 | 10212 M | 1.092  | 9.71  | 0.0789  | 2629  |
| Shcbp1        | A_51_P204402 | NM_011369    | Shc SH2-domain binding protein 1                                       | -1.58  | 61.79 | 0.71109 | 18003 P | 1.005  | 42.43 | 0.94292 | 12509 |
| Alcam         | A_51_P359272 | NM_009655    | activated leukocyte cell adhesion molecule 1                           | -1.582 | 10.84 | 0.15792 | 1322 P  | -1.182 | 1.62  | 0.03829 | 1456  |
| D230004J03Rik | A_52_P173108 | XM_886913    | RIKEN cDNA D230004J03 gene                                             | -1.582 | 7.45  | 0.12618 | 989 P   | -1.005 | 49.48 | 0.92304 | 12319 |
| D430014M15    | A_51_P306949 | NM_177764    | predicted gene, EG269902                                               | -1.585 | 12.21 | 0.1769  | 1606 P  | 1.027  | 36.07 | 0.65435 | 9913  |
| Man1a         | A_51_P287418 | NM_008548    | mannosidase 1, alpha                                                   | -1.585 | 10.84 | 0.24262 | 2222 M  | -1.039 | 46.85 | 0.71798 | 10470 |
| Ube2c         | A_51_P451151 | NM_026785    | ubiquitin-conjugating enzyme E2C                                       | -1.585 | 31.88 | 0.36867 | 5592 P  | 1.033  | 30.75 | 0.4864  | 8399  |
| Cd24a         | A_52_P244193 | NM_009846    | CD24a antigen                                                          | -1.587 | 23.47 | 0.33844 | 4086 M  | -1.097 | 28.13 | 0.33251 | 6708  |
| Slc1a3        | A_51_P268697 | NM_148938    | solute carrier family 1 (glial high affinity glutamate) member 3       | -1.587 | 13.61 | 0.18383 | 1683 P  | 1.05   | 28.13 | 0.45348 | 8033  |
| Der13         | A_51_P491667 | NM_024440    | Der1-like domain family, member 3                                      | -1.592 | 10.33 | 0.15198 | 1254 P  | -1.252 | 0.51  | 0.00697 | 216   |
| Tcf3          | A_52_P387724 | NM_001079822 | transcription factor 3                                                 | -1.592 | 25.79 | 0.32426 | 4492 P  | 1.099  | 8.32  | 0.0689  | 2373  |
| Nfkb1         | A_52_P582969 | BC050841     | nuclear factor of kappa light chain gene epsilon                       | -1.595 | 28.61 | 0.35492 | 5246 P  | 1.048  | 22.1  | 0.2939  | 6269  |
| Rad51c        | A_51_P252519 | NM_053269    | Rad51 homolog c (S. cerevisiae)                                        | -1.595 | 31.88 | 0.36771 | 5580 P  | -1.095 | 11.33 | 0.09238 | 2952  |
| Slc2a2        | A_51_P185693 | NM_031197    | solute carrier family 2 (facilitated glucose transporter) member 2     | -1.595 | 31.88 | 0.42175 | 5884 M  | -1.147 | 11.33 | 0.21301 | 5084  |
| Wiz           | A_51_P196056 | NM_212438    | widely-interspaced zinc finger motifs                                  | -1.595 | 20.94 | 0.32338 | 3692 M  | 1.046  | 33.49 | 0.71087 | 10408 |
| Cyp2u1        | A_52_P421698 | NM_027816    | cytochrome P450, family 2, subfamily u, polypeptide 1                  | -1.597 | 18.5  | 0.23742 | 2483 P  | -1.067 | 43.75 | 0.61731 | 9604  |
| Hdac6         | A_51_P449361 | NM_010413    | histone deacetylase 6                                                  | -1.6   | 16.01 | 0.20501 | 2007 P  | -1.183 | 3.46  | 0.08658 | 2817  |
| Lphn3         | A_51_P121962 | AK051766     | latrophilin 3                                                          | -1.6   | 16.01 | 0.21534 | 2132 P  | 1.05   | 25.31 | 0.35968 | 7001  |
| Plekha5       | A_52_P587054 | NM_144920    | pleckstrin homology domain containing, family 5, subfamily A, member 5 | -1.6   | 4.11  | 0.09418 | 698 P   | -1.03  | 48.7  | 0.79156 | 11109 |
| Ahcy1         | A_52_P491971 | AK087454     | S-adenosylhomocysteine hydrolase-like 1                                | -1.603 | 28.61 | 0.33775 | 4876 P  | 1.097  | 22.1  | 0.49414 | 8485  |
| Mtac2d1       | A_52_P448749 | AK053942     | membrane targeting (tandem) C2 domain containing protein 2             | -1.603 | 53.87 | 0.63676 | 15571 P | 2.249  | 0     | 0.00367 | 2     |

|               |              |              |                                              |        |       |         |         |        |       |         |       |
|---------------|--------------|--------------|----------------------------------------------|--------|-------|---------|---------|--------|-------|---------|-------|
| Fbxw11        | A_52_P962431 | AK010033     | F-box and WD-40 domain protein 11            | -1.605 | 20.94 | 0.26119 | 3013 P  | 1.061  | 22.1  | 0.38332 | 7319  |
| C630004H02Rik | A_51_P186552 | NM_175454    | RIKEN cDNA C630004H02 gene                   | -1.608 | 6.91  | 0.11833 | 915 P   | -1.143 | 8.32  | 0.14368 | 3917  |
| Cnn1          | A_51_P350817 | NM_009922    | calponin 1                                   | -1.608 | 49.93 | 0.57439 | 12213 P | 1.035  | 30.75 | 0.49912 | 8569  |
| Serpinp1a     | A_51_P181297 | NM_025429    | serine (or cysteine) peptidase inhibitor, cl | -1.608 | 42.28 | 0.49127 | 9273 P  | 1.004  | 42.43 | 0.94576 | 12546 |
| Tmsb4x        | A_51_P224843 | NM_021278    | thymosin, beta 4, X chromosome               | -1.608 | 25.79 | 0.354   | 4368 M  | -1.135 | 28.13 | 0.41266 | 7647  |
| Clps          | A_51_P164459 | NM_025469    | colipase, pancreatic                         | -1.61  | 57.76 | 0.6888  | 13512 M | 1.152  | 13.58 | 0.40439 | 7562  |
| Cpa1          | A_52_P161237 | NM_025350    | carboxypeptidase A1                          | -1.613 | 45.92 | 0.54267 | 8996 M  | 1      | 42.43 | 0.99863 | 13039 |
| P2rx1         | A_52_P494081 | NM_008771    | purinergic receptor P2X, ligand-gated ion    | -1.613 | 42.28 | 0.51595 | 10161 P | 1.043  | 25.31 | 0.36414 | 7075  |
| Rnase1        | A_51_P472153 | NM_011271    | ribonuclease, RNase A family, 1 (pancreat    | -1.613 | 38.68 | 0.47916 | 7309 M  | 1.018  | 42.43 | 0.87093 | 11764 |
| Ehd1          | A_51_P469008 | NM_010119    | EH-domain containing 1                       | -1.618 | 16.01 | 0.21676 | 2162 P  | 1.204  | 3.46  | 0.03913 | 1484  |
| Kcnh7         | A_52_P376374 | AK043768     | potassium voltage-gated channel, subfam      | -1.618 |       | 0.5377  | 6142 A  | 1.1    | 9.71  | 0.09775 | 3061  |
| Slc41a3       | A_51_P442097 | NM_027868    | solute carrier family 41, member 3           | -1.618 | 13.61 | 0.19322 | 1853 P  | -1.117 | 6.98  | 0.07325 | 2489  |
| Gls2          | A_51_P169087 | NM_001033264 | glutaminase 2 (liver, mitochondrial)         | -1.621 | 10.33 | 0.1443  | 1188 P  | -1.225 | 1.58  | 0.04735 | 1773  |
| Arhgap9       | A_51_P439326 | NM_146011    | Rho GTPase activating protein 9              | -1.623 | 20.94 | 0.26649 | 3098 P  | 1.183  | 3.46  | 0.03601 | 1389  |
| 2610207I05Rik | A_51_P371695 | NM_001031814 | RIKEN cDNA 2610207I05 gene                   | -1.626 | 23.47 | 0.27843 | 3405 P  | 1.009  | 42.43 | 0.90963 | 12189 |
| Srd5a2l       | A_51_P334730 | NM_020611    | steroid 5 alpha-reductase 2-like             | -1.626 | 6.91  | 0.11375 | 878 P   | -1.103 | 6.98  | 0.06217 | 2199  |
| Cyp2f2        | A_51_P453909 | NM_007817    | cytochrome P450, family 2, subfamily f, p    | -1.629 |       | 0.53113 | 6016 A  | 1.072  | 16.2  | 0.25011 | 5642  |
| Kcnn3         | A_51_P508300 | NM_080466    | potassium intermediate/small conductan       | -1.629 | 6.91  | 0.11112 | 851 P   | -1.207 | 0.92  | 0.01417 | 596   |
| Dmbt1         | A_51_P500676 | NM_007769    | deleted in malignant brain tumors 1          | -1.631 | 16.01 | 0.2752  | 2794 M  | -1.413 | 0.51  | 0.00584 | 41    |
| Pdgfa         | A_51_P370090 | NM_008808    | platelet derived growth factor, alpha        | -1.631 | 23.47 | 0.29875 | 3813 P  | 1.19   | 3.46  | 0.02917 | 1175  |
| Gata3         | A_52_P546363 | NM_008091    | GATA binding protein 3                       | -1.637 | 25.79 | 0.31995 | 4370 P  | 1.049  | 28.13 | 0.42028 | 7732  |
| Ins1          | A_51_P312755 | NM_008386    | insulin I                                    | -1.637 | 57.76 | 0.70968 | 14341 M | 1.02   | 40.63 | 0.79257 | 11121 |
| Tpst1         | A_51_P417025 | NM_013837    | protein-tyrosine sulfotransferase 1          | -1.637 | 16.01 | 0.21095 | 2070 P  | -1.147 | 3.82  | 0.0659  | 2314  |
| Foxp1         | A_52_P276792 | NM_053202    | forkhead box P1                              | -1.639 | 5.86  | 0.10304 | 788 P   | 1.074  | 19.02 | 0.35169 | 6902  |
| Ube2h         | A_52_P304798 | NM_009459    | ubiquitin-conjugating enzyme E2H             | -1.639 | 13.61 | 0.2011  | 1963 P  | 1.117  | 8.32  | 0.07774 | 2590  |
| Kcnn4         | A_51_P389636 | NM_008433    | potassium intermediate/small conductan       | -1.642 | 57.76 | 0.71034 | 18968 P | -1.089 | 19.02 | 0.15136 | 4058  |
| Ptges         | A_51_P312327 | NM_022415    | prostaglandin E synthase                     | -1.642 | 4.65  | 0.09071 | 644 P   | 1.005  | 42.43 | 0.97124 | 12759 |
| Rbp2          | A_52_P125363 | NM_009034    | retinol binding protein 2, cellular          | -1.642 | 65.79 | 0.7642  | 21883 P | -1.095 | 22.1  | 0.20694 | 5005  |
| Tbl1x         | A_52_P260592 | NM_020601    | transducin (beta)-like 1 X-linked            | -1.65  | 5.86  | 0.10238 | 775 P   | 1.069  | 16.2  | 0.1763  | 4505  |
| St3gal1       | A_51_P301804 | NM_009177    | ST3 beta-galactoside alpha-2,3-sialyltrans   | -1.653 | 12.21 | 0.17312 | 1540 P  | -1.017 | 49.22 | 0.704   | 10348 |
| H2-K1         | A_52_P50496  | AK168517     | histocompatibility 2, K1, K region           | -1.656 | 28.61 | 0.34064 | 4933 P  | 1.032  | 38.4  | 0.77354 | 10950 |
| Fkbp11        | A_52_P326399 | NM_024169    | FK506 binding protein 11                     | -1.658 | 10.84 | 0.158   | 1324 P  | -1.254 | 4.63  | 0.19298 | 4796  |
| Ctla4         | A_52_P184548 | NM_009843    | cytotoxic T-lymphocyte-associated protein    | -1.661 | 38.68 | 0.49168 | 8128 P  | -1.03  | 49.39 | 0.83458 | 11491 |
| Pftk1         | A_51_P367081 | NM_011074    | PFTAIRE protein kinase 1                     | -1.661 | 5.15  | 0.09201 | 676 P   | -1.198 | 3.46  | 0.0952  | 3003  |
| Mknk1         | A_52_P246082 | NM_021461    | MAP kinase-interacting serine/threonine      | -1.664 | 5.86  | 0.09691 | 720 P   | -1.097 | 40.63 | 0.57988 | 9258  |
| Clic6         | A_52_P447284 | NM_172469    | chloride intracellular channel 6             | -1.667 | 61.79 | 0.73504 | 20452 P | 1.053  | 25.31 | 0.41073 | 7614  |
| Nr3c1         | A_52_P254174 | NM_008173    | nuclear receptor subfamily 3, group C, me    | -1.672 | 13.61 | 0.19756 | 1907 P  | 1.02   | 38.4  | 0.70065 | 10321 |
| Foxp2         | A_51_P233753 | NM_053242    | forkhead box P2                              | -1.675 | 16.01 | 0.22111 | 2221 P  | 1.024  | 36.07 | 0.65004 | 9882  |
| Srrm1         | A_51_P446098 | NM_016799    | serine/arginine repetitive matrix 1          | -1.675 | 28.61 | 0.35622 | 5265 P  | 1.119  | 11.33 | 0.24196 | 5528  |
| Furin         | A_51_P400107 | NM_011046    | furin (paired basic amino acid cleaving en   | -1.678 | 28.61 | 0.38551 | 5033 M  | -1.007 | 49.48 | 0.90778 | 12175 |
| Kctd6         | A_51_P297865 | NM_027782    | potassium channel tetramerisation doma       | -1.678 | 9.39  | 0.14396 | 1175 P  | -1.206 | 1.32  | 0.03072 | 1214  |
| Cd38          | A_52_P168962 | NM_007646    | CD38 antigen                                 | -1.684 |       | 0.50704 | 5495 A  | -1.024 | 49    | 0.7429  | 10720 |
| Kif12         | A_51_P344586 | NM_010616    | kinesin family member 12                     | -1.684 | 13.61 | 0.20291 | 1978 P  | -1.051 | 42.43 | 0.38269 | 7311  |
| Atp2a3        | A_52_P262209 | NM_016745    | ATPase, Ca++ transporting, ubiquitous        | -1.686 | 12.21 | 0.182   | 1650 P  | 1.073  | 16.2  | 0.20163 | 4932  |
| Bcat2         | A_52_P448266 | NM_009737    | branched chain aminotransferase 2, mito      | -1.692 | 3.78  | 0.07413 | 498 P   | 1.038  | 28.13 | 0.4068  | 7585  |
| Pnliprp1      | A_51_P136781 | NM_018874    | pancreatic lipase related protein 1          | -1.692 | 28.61 | 0.38628 | 5048 M  | 1.258  | 1.62  | 0.01925 | 807   |
| AW548124      | A_52_P299535 | NM_134117    | expressed sequence AW548124                  | -1.695 | 4.11  | 0.07997 | 552 P   | 1.07   | 19.02 | 0.30075 | 6333  |
| Depdc6        | A_52_P661503 | AK170208     | DEP domain containing 6                      | -1.695 | 5.15  | 0.16264 | 1241 M  | 1.056  | 16.2  | 0.20563 | 4981  |
| 1810044A24Rik | A_52_P488649 | AK029106     | RIKEN cDNA 1810044A24 gene                   | -1.698 | 12.21 | 0.18646 | 1741 P  | 1.008  | 42.43 | 0.92201 | 12283 |
| Pvrl3         | A_51_P125009 | NM_021495    | poliovirus receptor-related 3                | -1.698 | 8.15  | 0.13196 | 1044 P  | -1.213 | 1.1   | 0.01816 | 772   |
| 2810451A06Rik | A_51_P257743 | NM_176835    | RIKEN cDNA 2810451A06 gene                   | -1.701 | 5.15  | 0.09365 | 693 P   | -1.058 | 40.63 | 0.3946  | 7454  |
| Bcl6          | A_52_P161495 | NM_009744    | B-cell leukemia/lymphoma 6                   | -1.701 | 5.15  | 0.13209 | 997 P   | 1.083  | 11.33 | 0.11714 | 3424  |
| Gucy2c        | A_51_P100991 | NM_145067    | guanylate cyclase 2c                         | -1.706 | 4.65  | 0.08664 | 602 P   | -1.035 | 45.05 | 0.49043 | 8444  |

|                |              |              |                                             |        |       |         |         |        |       |         |       |
|----------------|--------------|--------------|---------------------------------------------|--------|-------|---------|---------|--------|-------|---------|-------|
| Ramp1          | A_51_P348665 | NM_016894    | receptor (calcitonin) activity modifying pr | -1.706 | 10.84 | 0.15746 | 1315 P  | 1.017  | 42.43 | 0.82608 | 11422 |
| Terf2          | A_52_P427544 | NM_009353    | telomeric repeat binding factor 2           | -1.706 | 5.15  | 0.08948 | 629 P   | -1.06  | 38.4  | 0.36472 | 7089  |
| Cel            | A_51_P242205 | NM_009885    | carboxyl ester lipase                       | -1.709 | 25.79 | 0.36697 | 4660 M  | 1.131  | 16.2  | 0.39259 | 7426  |
| Dscr1l1        | A_52_P414464 | NM_207649    | Down syndrome critical region gene 1-like   | -1.709 | 13.61 | 0.19661 | 1880 P  | 1.027  | 36.07 | 0.61332 | 9555  |
| Pla2g2f        | A_52_P114691 | NM_012045    | phospholipase A2, group IIF                 | -1.709 | 31.88 | 0.39742 | 6445 P  | -1.071 | 43.15 | 0.56462 | 9160  |
| Rad51          | A_51_P148105 | NM_011234    | RAD51 homolog (S. cerevisiae)               | -1.715 | 42.28 | 0.49899 | 9627 P  | 1.079  | 9.71  | 1.10096 | 3128  |
| Cbfa2t3h       | A_52_P13802  | NM_009824    | core-binding factor, runt domain, alpha s   | -1.718 | 4.65  | 0.08664 | 600 P   | -1.067 | 36.07 | 0.304   | 6373  |
| Ggcx           | A_52_P110812 | NM_019802    | gamma-glutamyl carboxylase                  | -1.718 | 10.84 | 0.1677  | 1467 P  | -1.091 | 30.75 | 0.31396 | 6508  |
| Lpgat1         | A_51_P453351 | NM_172266    | lysophosphatidylglycerol acyltransferase    | -1.724 | 4.65  | 0.0868  | 612 P   | 1.015  | 42.43 | 0.92862 | 12376 |
| NP_TR6JSE50FPA | A_51_P471134 | NM_203509    | olfactory receptor 1372, pseudogene 1       | -1.724 | 7.45  | 0.12071 | 928 P   | 1.307  | 3.01  | 0.07359 | 2499  |
| Pcyox1         | A_51_P508029 | NM_025823    | prenylcysteine oxidase 1                    | -1.724 | 3.82  | 0.07413 | 496 P   | 1.023  | 38.4  | 0.72507 | 10524 |
| Dpysl4         | A_52_P470438 | NM_011993    | dihydropyrimidinase-like 4                  | -1.727 | 49.93 | 0.58727 | 12881 P | 1.032  | 30.75 | 0.47441 | 8250  |
| Spbc25         | A_51_P514700 | NM_025565    | SPC25, NDC80 kinetochore complex comp       | -1.727 | 7.45  | 0.12332 | 959 P   | -1.184 | 11.33 | 0.27484 | 6023  |
| Ntrk2          | A_51_P393454 | NM_001025074 | neurotrophic tyrosine kinase, receptor, ty  | -1.73  | 6.91  | 0.11375 | 877 P   | 1.017  | 38.4  | 0.69072 | 10244 |
| Rgs11          | A_52_P209527 | BC019741     | regulator of G-protein signaling 11         | -1.73  | 35.45 | 0.44105 | 7665 P  | -1.038 | 45.68 | 0.57598 | 9232  |
| Nisch          | A_52_P472515 | AK088377     | nischarin                                   | -1.733 | 18.5  | 0.25155 | 2817 P  | -1.01  | 49.48 | 0.93323 | 12413 |
| Pzp            | A_51_P490323 | NM_007376    |                                             | -1.733 |       | 0.50317 | 6646 A  | 1.043  | 25.31 | 0.33411 | 6728  |
| Exosc3         | A_52_P488409 | AK016397     | exosome component 3                         | -1.751 | 7.45  | 0.11833 | 912 P   | 1.035  | 30.75 | 0.5252  | 8801  |
| Bach2          | A_52_P184618 | NM_007521    | BTB and CNC homology 2                      | -1.757 | 10.84 | 0.16423 | 1420 P  | 1.087  | 16.2  | 0.27611 | 6043  |
| Arid3b         | A_52_P454394 | NM_019689    | AT rich interactive domain 3B (Bright like) | -1.764 | 7.45  | 0.12327 | 956 P   | 1.066  | 16.2  | 0.20858 | 5029  |
| Parp3          | A_52_P480425 | NM_145619    | poly (ADP-ribose) polymerase family, mer    | -1.767 | 13.61 | 0.20154 | 1964 P  | -1.059 | 40.63 | 0.40595 | 7577  |
| Procr          | A_51_P382152 | NM_011171    | protein C receptor, endothelial             | -1.767 | 28.61 | 0.37403 | 5715 P  | -1.006 | 49.48 | 0.93118 | 12395 |
| Cdon           | A_51_P334739 | NM_021339    | cell adhesion molecule-related/down-reg     | -1.773 | 6.57  | 0.10308 | 794 P   | 1.009  | 42.43 | 0.85083 | 11600 |
| Cpb1           | A_51_P391934 | NM_029706    | carboxypeptidase B1 (tissue)                | -1.779 | 38.68 | 0.49512 | 7714 M  | -1.263 | 0.51  | 0.01026 | 390   |
| Trim25         | A_52_P654161 | NM_009546    | tripartite motif protein 25                 | -1.779 | 13.61 | 0.21253 | 2094 P  | 1.168  | 3.46  | 0.0248  | 1027  |
| Ankrd10        | A_51_P499530 | NM_133971    | ankyrin repeat domain 10                    | -1.786 | 5.15  | 0.08759 | 619 P   | -1.127 | 19.02 | 0.28158 | 6108  |
| Itp3           | A_51_P104897 | NM_080553    | inositol 1,4,5-triphosphate receptor 3      | -1.786 | 28.61 | 0.35908 | 5385 P  | 1.01   | 42.43 | 0.87369 | 11796 |
| Nudt4          | A_52_P305246 | NM_027722    | nudix (nucleoside diphosphate linked mo     | -1.786 | 6.91  | 0.11273 | 870 P   | 1.077  | 13.58 | 0.13402 | 3744  |
| Mki67          | A_51_P253808 | X82786       | antigen identified by monoclonal antibod    | -1.805 | 25.79 | 0.26149 | 2933 M  | 1.013  | 42.43 | 0.78965 | 11085 |
| Hbegf          | A_51_P181565 | NM_010415    | heparin-binding EGF-like growth factor      | -1.808 | 38.68 | 0.47617 | 8840 P  | -1.045 | 43.15 | 0.42795 | 7799  |
| Camk1d         | A_52_P384310 | NM_177343    | calcium/calmodulin-dependent protein ki     | -1.812 | 8.15  | 0.13102 | 1035 P  | 1.044  | 28.13 | 0.37772 | 7252  |
| Gadd45g        | A_51_P315904 | NM_011817    | growth arrest and DNA-damage-inducible      | -1.812 | 3.78  | 0.12332 | 884 M   | -1.044 | 45.05 | 0.58195 | 9267  |
| Hmgn3          | A_51_P422183 | BC005693     | high mobility group nucleosomal binding     | -1.812 | 10.84 | 0.17365 | 1561 P  | -1.135 | 22.1  | 0.32039 | 6570  |
| Ror1           | A_52_P212025 | AK012979     | receptor tyrosine kinase-like orphan rece   | -1.812 | 5.86  | 0.09691 | 722 P   | 1.052  | 19.02 | 0.24312 | 5550  |
| Tbx18          | A_52_P279263 | NM_023814    | T-box18                                     | -1.812 | 6.91  | 0.1589  | 1160 P  | 1.084  | 19.02 | 0.33041 | 6675  |
| Abcc8          | A_52_P218188 | NM_011510    | ATP-binding cassette, sub-family C (CFTR/   | -1.815 | 16.01 | 0.21981 | 2193 P  | -1.181 | 3.46  | 0.07277 | 2467  |
| Hsd17b13       | A_52_P595140 | NM_198030    | hydroxysteroid (17-beta) dehydrogenase      | -1.818 | 25.79 | 0.34172 | 4958 P  | -1.148 | 3.82  | 0.06338 | 2243  |
| Rhobtb1        | A_52_P614517 | XM_920622    | Rho-related BTB domain containing 1         | -1.818 | 9.39  | 0.16091 | 1252 M  | -1.195 | 1.18  | 0.01893 | 796   |
| Rasd1          | A_52_P496726 | NM_009026    | RAS, dexamethasone-induced 1                | -1.825 | 16.01 | 0.24343 | 2634 P  | 1.008  | 42.43 | 0.882   | 11875 |
| Stch           | A_52_P376804 | NM_030201    | stress 70 protein chaperone, microsomes-    | -1.825 | 12.21 | 0.18392 | 1684 P  | 1.036  | 36.07 | 0.70599 | 10374 |
| Tnfrsf22       | A_52_P323852 | NM_023680    | tumor necrosis factor receptor superfami    | -1.828 | 3.78  | 0.06658 | 420 P   | 1.03   | 33.49 | 0.59744 | 9426  |
| 2310014D11Rik  | A_51_P440923 | AK009333     | RIKEN cDNA 2310014D11 gene                  | -1.832 | 6.57  | 0.11558 | 854 P   | -1.028 | 49.22 | 0.80404 | 11209 |
| D430019H16Rik  | A_52_P97699  | BC058677     | RIKEN cDNA D430019H16 gene                  | -1.832 | 23.47 | 0.30128 | 3891 P  | -1.04  | 44.4  | 0.49423 | 8492  |
| Eif4enif1      | A_52_P285418 | AK090363     | eukaryotic translation initiation factor 4E | -1.835 | 42.28 | 0.33772 | 4512 M  | 1.081  | 13.58 | 0.18052 | 4581  |
| Gstm2          | A_51_P284486 | NM_008183    | glutathione S-transferase, mu 2             | -1.852 | 1.87  | 0.05412 | 329 P   | -1.141 | 3.82  | 0.05218 | 1927  |
| Hhex           | A_52_P528600 | NM_008245    | hematopoietically expressed homeobox        | -1.859 | 9.39  | 0.1416  | 1145 P  | 1.054  | 22.1  | 0.61123 | 8871  |
| Cnot8          | A_51_P481293 | NM_026949    | CCR4-NOT transcription complex, subunit     | -1.866 | 2.87  | 0.06292 | 387 P   | 1.037  | 30.75 | 0.42859 | 7808  |
| Fh1            | A_51_P359333 | NM_010209    | fumarate hydratase 1                        | -1.869 | 5.15  | 0.11123 | 820 P   | -1.024 | 49.39 | 0.79758 | 11155 |
| Ell2           | A_51_P230507 | NM_138953    | elongation factor RNA polymerase II 2       | -1.873 | 4.11  | 0.07465 | 504 P   | -1.284 | 0.51  | 0.0065  | 182   |
| Kctd1          | A_52_P137637 | XM_980194    | potassium channel tetramerisation doma      | -1.88  | 23.47 | 0.31447 | 4242 P  | -1.317 | 0.51  | 0.00707 | 220   |
| Rps6ka2        | A_51_P320466 | NM_011299    | ribosomal protein S6 kinase, polypeptide    | -1.88  | 5.15  | 0.09071 | 643 P   | 1.113  | 5.75  | 0.0453  | 1701  |
| Pla2g1b        | A_51_P280893 | NM_011107    | phospholipase A2, group IB, pancreas        | -1.883 | 20.94 | 0.31826 | 3608 M  | 1.025  | 36.07 | 0.65871 | 9960  |
| Ctrc           | A_51_P384436 | NM_001033875 | chymotrypsin C (caldecrin)                  | -1.887 | 25.79 | 0.3571  | 4428 M  | 1.203  | 13.58 | 0.47683 | 8280  |

|               |              |              |                                             |        |       |         |         |        |       |         |       |
|---------------|--------------|--------------|---------------------------------------------|--------|-------|---------|---------|--------|-------|---------|-------|
| Foxm1         | A_52_P28806  | NM_008021    | forkhead box M1                             | -1.901 | 16.01 | 0.23366 | 2414 P  | 1.065  | 28.13 | 0.54113 | 8954  |
| Rrbp1         | A_51_P164686 | BC031452     | ribosome binding protein 1                  | -1.901 | 4.11  | 0.07112 | 471 P   | 1.014  | 42.43 | 0.81873 | 11347 |
| Gcnt2         | A_52_P363216 | NM_133219    | glucosaminyl (N-acetyl) transferase 2, l-br | -1.905 | 1.87  | 0.05412 | 330 P   | -1.243 | 0.56  | 0.01123 | 432   |
| Gstm1         | A_52_P415215 | NM_010358    | glutathione S-transferase, mu 1             | -1.905 | 7.45  | 0.11833 | 911 P   | -1.164 | 2.04  | 0.03696 | 1408  |
| Eml1          | A_52_P54609  | AK082168     | echinoderm microtubule associated prote     | -1.912 | 18.5  | 0.26936 | 3141 P  | 1.013  | 42.43 | 0.84438 | 11557 |
| Mtmr3         | A_51_P150195 | NM_028860    | myotubularin related protein 3              | -1.912 | 9.39  | 0.1478  | 1219 P  | 1.087  | 11.33 | 0.13593 | 3772  |
| Vit           | A_52_P51176  | AK018949     | vitrin                                      | -1.916 |       | 0.42946 | 4056 A  | -1.003 | 49.48 | 0.96478 | 12703 |
| Stat4         | A_51_P177092 | NM_011487    | signal transducer and activator of transcri | -1.927 | 4.65  | 0.07612 | 524 P   | 1.039  | 30.75 | 0.48206 | 8341  |
| C1qa          | A_51_P181451 | NM_007572    | complement component 1, q subcomponent      | -1.931 | 4.65  | 0.08156 | 571 P   | 1.058  | 22.1  | 0.28383 | 6128  |
| Rhoh          | A_51_P489289 | BC094937     | ras homolog gene family, member H           | -1.931 |       | 0.27137 | 3076 A  | 1.062  | 19.02 | 0.22    | 5211  |
| Satb1         | A_52_P110489 | AK040502     | special AT-rich sequence binding protein 1  | -1.934 | 10.33 | 0.15535 | 1296 P  | 1.009  | 42.43 | 0.92273 | 12309 |
| Cdk8          | A_52_P771744 | AK089626     | cyclin-dependent kinase 8                   | -1.938 | 2.4   | 0.05799 | 352 P   | -1.182 | 6.98  | 0.18644 | 4678  |
| Kras          | A_51_P377237 | NM_021284    | v-Ki-ras2 Kirsten rat sarcoma viral oncoge  | -1.938 | 12.21 | 0.1841  | 1640 P  | -1.326 | 0.51  | 0.01625 | 697   |
| Reg1          | A_51_P329811 | NM_009042    | regenerating islet-derived 1                | -1.942 | 18.5  | 0.28813 | 3012 M  | -1.188 | 3.82  | 0.11418 | 3371  |
| Bcl6b         | A_51_P424959 | NM_007528    | B-cell CLL/lymphoma 6, member B             | -1.949 | 1.44  | 0.04421 | 267 P   | -1.113 | 4.63  | 0.05166 | 1901  |
| Rel           | A_51_P187461 | NM_009044    | reticuloendotheliosis oncogene              | -1.949 | 31.88 | 0.40867 | 6686 P  | -1.044 | 44.4  | 0.55828 | 9086  |
| Ela1          | A_52_P578634 | NM_033612    | elastase 1, pancreatic                      | -1.953 | 13.61 | 0.24877 | 2342 M  | 1.187  | 9.71  | 0.25769 | 5778  |
| Vnn1          | A_51_P424532 | NM_011704    | vanin 1                                     | -1.957 | 49.93 | 0.6028  | 13581 P | 1.17   | 4.63  | 0.05437 | 1990  |
| Baiap2l1      | A_52_P138096 | NM_025833    | BAI1-associated protein 2-like 1            | -1.969 | 7.45  | 0.12526 | 979 P   | -1.302 | 0.51  | 0.01049 | 403   |
| Ccnb1         | A_51_P287093 | NM_172301    | cyclin B1                                   | -1.969 | 20.94 | 0.29663 | 3741 P  | -1.272 | 0.75  | 0.01896 | 799   |
| Aldoc         | A_51_P425284 | AK039267     | aldolase 3, C isoform                       | -1.972 | 57.76 | 0.32734 | 3174 M  | -1.053 | 38.4  | 0.31369 | 6501  |
| Ctrl          | A_51_P177491 | NM_023182    | chymotrypsin-like                           | -1.976 | 16.01 | 0.28068 | 2906 M  | 1.051  | 28.13 | 0.53134 | 8848  |
| Tat           | A_51_P228574 | NM_146214    | tyrosine aminotransferase                   | -1.976 | 5.15  | 0.08931 | 626 P   | 1.065  | 19.02 | 0.2311  | 5364  |
| Ptf1a         | A_51_P226711 | NM_018809    | pancreas specific transcription factor, 1a  | -1.984 | 10.84 | 0.17059 | 1491 P  | 1.183  | 3.01  | 0.02595 | 1067  |
| G6pc2         | A_52_P498119 | NM_021331    | glucose-6-phosphatase, catalytic, 2         | -1.988 | 5.86  | 0.14088 | 1020 M  | -1.323 | 1.58  | 0.09269 | 2958  |
| Wars          | A_52_P35174  | NM_011710    | tryptophanyl-tRNA synthetase                | -1.996 | 9.39  | 0.15268 | 1274 P  | 1.013  | 42.43 | 0.83438 | 11488 |
| Pnlip         | A_51_P520552 | AK007357     | pancreatic lipase                           | -2     | 9.39  | 0.1849  | 1487 M  | 1.073  | 16.2  | 0.22718 | 5316  |
| Tnfaip8       | A_51_P435968 | NM_134131    | tumor necrosis factor, alpha-induced prot   | -2.012 | 31.88 | 0.41119 | 6773 P  | -1.048 | 42.43 | 0.35632 | 6967  |
| Bcas3         | A_52_P311618 | AK034117     | breast carcinoma amplified sequence 3       | -2.016 |       | 0.4035  | 3588 A  | 1.121  | 8.32  | 0.07211 | 2434  |
| Rnf141        | A_52_P560797 | NM_025999    | ring finger protein 141                     | -2.02  | 4.11  | 0.074   | 494 P   | 1.032  | 33.49 | 0.54705 | 8998  |
| Cd9           | A_51_P320626 | AK038228     |                                             | -2.028 | 42.28 | 0.54119 | 11056 P | 1.041  | 38.4  | 0.82109 | 11374 |
| Aqp8          | A_51_P183261 | NM_007474    | aquaporin 8                                 | -2.033 | 45.92 | 0.56738 | 11956 P | 1.008  | 42.43 | 0.89842 | 12046 |
| Mbc2          | A_51_P334685 | NM_011843    | membrane bound C2 domain containing p       | -2.033 | 3.82  | 0.06716 | 425 P   | -1.188 | 0.75  | 0.0131  | 568   |
| Adra2a        | A_51_P434567 | NM_007417    | adrenergic receptor, alpha 2a               | -2.041 | 4.65  | 0.07612 | 525 P   | -1.042 | 45.05 | 0.57598 | 9236  |
| Akr1b7        | A_51_P331288 | NM_009731    | aldo-keto reductase family 1, member B7     | -2.041 | 53.87 | 0.67678 | 17330 P | 1.157  | 9.71  | 0.2389  | 5471  |
| Efemp1        | A_51_P337412 | NM_146015    | epidermal growth factor-containing fibuli   | -2.041 | 6.91  | 0.11992 | 924 P   | 1.1    | 9.71  | 0.08874 | 2863  |
| Aurkb         | A_51_P415059 | NM_011496    | aurora kinase B                             | -2.045 | 35.45 | 0.19322 | 1323 M  | 1.157  | 9.71  | 0.25838 | 5790  |
| Birc5         | A_51_P230103 | NM_001012273 | baculoviral IAP repeat-containing 5         | -2.045 | 49.93 | 0.60124 | 13516 P | 1.013  | 42.43 | 0.80819 | 11260 |
| Tm4sf4        | A_51_P371001 | NM_145539    | transmembrane 4 superfamily member 4        | -2.049 | 7.45  | 0.1607  | 1286 P  | -1.083 | 19.02 | 0.13993 | 3852  |
| Mgll          | A_52_P568977 | AK006949     | monoglyceride lipase                        | -2.053 |       | 0.39447 | 3452 A  | -1.05  | 38.4  | 0.28538 | 6151  |
| Ranbp17       | A_52_P175046 | AK046865     | RAN binding protein 17                      | -2.062 | 16.01 | 0.24428 | 2680 P  | -1.32  | 0.51  | 0.00903 | 330   |
| BC039632      | A_52_P501167 | XM_620568    | cDNA sequence BC039632                      | -2.07  | 8.15  | 0.1769  | 1407 M  | -1.246 | 1.62  | 0.0734  | 2494  |
| Cd44          | A_52_P523459 | NM_009851    | CD44 antigen                                | -2.07  | 16.01 | 0.24333 | 2616 P  | -1.023 | 47.92 | 0.63929 | 9801  |
| 2310040A07Rik | A_51_P497090 | BC021944     | RIKEN cDNA 2310040A07 gene                  | -2.079 | 6.57  | 0.10284 | 779 P   | -1.044 | 43.15 | 0.37881 | 7263  |
| Tff3          | A_51_P456208 | NM_011575    | trefoil factor 3, intestinal                | -2.083 | 57.76 | 0.83789 | 25113 P | 1.019  | 40.63 | 0.71936 | 10489 |
| Paxip1        | A_51_P232720 | NM_018878    | PAX interacting (with transcription-activat | -2.092 | 0.77  | 0.03147 | 195 P   | -1.201 | 2.53  | 0.07199 | 2433  |
| Defb1         | A_52_P321140 | NM_007843    | defensin beta 1                             | -2.11  | 6.91  | 0.11679 | 880 P   | -1.292 | 3.82  | 0.19327 | 4798  |
| Prss2         | A_51_P418901 | NM_009430    | protease, serine, 2                         | -2.11  | 38.68 | 0.50937 | 8083 M  | 1.239  | 2.04  | 0.02003 | 856   |
| Nexn          | A_52_P367520 | NM_199465    | nexilin                                     | -2.114 | 10.84 | 0.18955 | 1797 P  | -1.154 | 2.04  | 0.03104 | 1227  |
| 1810049H19Rik | A_51_P276486 | NM_001003405 | RIKEN cDNA 1810049H19 gene                  | -2.123 | 45.92 | 0.58882 | 10362 M | 1.294  | 4.63  | 0.14189 | 3884  |
| Ctrb1         | A_51_P205761 | NM_025583    | chymotrypsinogen B1                         | -2.132 | 23.47 | 0.34902 | 4260 M  | 1.318  | 0.75  | 0.00756 | 276   |
| Ceacam1       | A_51_P183446 | NM_001039186 | CEA-related cell adhesion molecule 1        | -2.137 | 38.68 | 0.48031 | 8955 P  | 1.077  | 19.02 | 0.29317 | 6259  |
| Tmod2         | A_52_P451614 | NM_001038710 | tropomodulin 2                              | -2.137 | 0.55  | 0.0289  | 172 P   | -1.093 | 42.43 | 0.63136 | 9729  |



|               |              |              |                                               |        |       |         |         |        |       |         |       |
|---------------|--------------|--------------|-----------------------------------------------|--------|-------|---------|---------|--------|-------|---------|-------|
| Ltb4dh        | A_51_P444437 | NM_025968    | leukotriene B4 12-hydroxydehydrogenase        | -2.146 | 38.68 | 0.47838 | 8911 P  | -1.163 | 2.53  | 0.0391  | 1476  |
| Ehf           | A_52_P609918 | NM_007914    | ets homologous factor                         | -2.16  | 25.79 | 0.3571  | 5290 P  | 1.02   | 38.4  | 0.68607 | 10204 |
| Uhrf1         | A_51_P491742 | NM_010931    | ubiquitin-like, containing PHD and RING f     | -2.16  | 35.45 | 0.44372 | 7764 P  | -1.17  | 3.01  | 0.05119 | 1883  |
| Traip         | A_51_P254045 | NM_011634    | TRAF-interacting protein                      | -2.174 | 10.33 | 0.17353 | 1555 P  | -1.087 | 25.31 | 0.23711 | 5449  |
| Cdc6          | A_52_P219473 | NM_011799    | cell division cycle 6 homolog (S. cerevisiae) | -2.179 |       | 0.1716  | 1113 A  | -1.138 | 2.53  | 0.03177 | 1250  |
| Etv5          | A_52_P631015 | NM_023794    | ets variant gene 5                            | -2.183 | 4.65  | 0.07997 | 545 P   | 1.072  | 22.1  | 0.39731 | 7491  |
| Scg2          | A_51_P327970 | NM_009129    | secretogranin II                              | -2.183 | 1.44  | 0.07413 | 476 M   | -1.073 | 42.43 | 0.54474 | 8982  |
| 2210010C04Rik | A_51_P414661 | NM_023333    | RIKEN cDNA 2210010C04 gene                    | -2.203 | 28.61 | 0.39874 | 5361 M  | 1.19   | 16.2  | 0.49039 | 8438  |
| Pycr2         | A_51_P249051 | NM_133705    | pyrroline-5-carboxylate reductase family,     | -2.203 | 3.82  | 0.06915 | 455 P   | 1.032  | 33.49 | 0.5684  | 9189  |
| ORF9          | A_51_P492047 | NM_020622    | open reading frame 9                          | -2.217 | 38.68 | 0.44834 | 7588 P  | 1.136  | 3.82  | 0.02902 | 1166  |
| Chst3         | A_52_P390944 | NM_016803    | carbohydrate (chondroitin 6/keratan) sulf     | -2.227 | 12.21 | 0.1443  | 1155 P  | 1.036  | 28.13 | 0.42376 | 7762  |
| Fosl1         | A_51_P308796 | NM_010235    | fos-like antigen 1                            | -2.232 | 61.79 | 0.1691  | 1084 M  | 1.008  | 42.43 | 0.86302 | 11706 |
| Elovl6        | A_51_P463440 | NM_130450    | ELOVL family member 6, elongation of lo       | -2.237 | 3.78  | 0.06245 | 379 P   | 1.192  | 8.32  | 0.2216  | 5234  |
| Prss3         | A_51_P394552 | NM_011645    | protease, serine, 3                           | -2.242 | 35.45 | 0.48193 | 7383 M  | 1.388  | 3.82  | 0.15044 | 4046  |
| Retnla        | A_52_P254817 | NM_020509    | resistin like alpha                           | -2.247 | 42.28 | 0.3531  | 4509 M  | -1.013 | 49.48 | 0.80573 | 11231 |
| Cbs           | A_52_P210246 | NM_144855    | cystathionine beta-synthase                   | -2.252 | 1.87  | 0.04995 | 297 P   | -1.092 | 11.33 | 0.09111 | 2925  |
| Il10          | A_51_P430766 | NM_010548    | interleukin 10                                | -2.257 |       | 0.35438 | 2869 A  | 1.011  | 42.43 | 0.82412 | 11398 |
| Il6ra         | A_51_P415855 | NM_010559    | interleukin 6 receptor, alpha                 | -2.262 | 3.82  | 0.06741 | 429 P   | -1.476 | 0.51  | 0.01933 | 812   |
| Slc39a4       | A_51_P103222 | NM_028064    | solute carrier family 39 (zinc transporter),  | -2.268 | 45.92 | 0.57885 | 12440 P | 1.062  | 19.02 | 0.21655 | 5150  |
| Cldn3         | A_51_P157902 | NM_009902    | claudin 3                                     | -2.299 | 5.15  | 0.09711 | 725 P   | -1.343 | 1.1   | 0.05591 | 2031  |
| Gpx2          | A_51_P486810 | NM_030677    | glutathione peroxidase 2                      | -2.299 | 49.93 | 0.61136 | 14009 P | -1.116 | 8.32  | 0.08883 | 2866  |
| Proc          | A_51_P295967 | NM_001042768 | protein C                                     | -2.299 | 6.57  | 0.10778 | 822 P   | 1.526  | 1.32  | 0.05145 | 1891  |
| Atp8b1        | A_51_P192329 | NM_001001488 | ATPase, class I, type 8B, member 1            | -2.304 | 1.38  | 0.0305  | 192 P   | -1.205 | 4.63  | 0.14846 | 4020  |
| Tgtp          | A_52_P676510 | NM_011579    | T-cell specific GTPase                        | -2.309 | 23.47 | 0.33231 | 4708 P  | -1.03  | 46.3  | 0.56495 | 9165  |
| Il1r1         | A_51_P271503 | NM_008362    | interleukin 1 receptor, type I                | -2.342 | 6.91  | 0.14891 | 1090 M  | -1.113 | 11.33 | 0.12581 | 3625  |
| Pvr           | A_52_P225377 | AK014446     | poliovirus receptor                           | -2.347 |       | 0.33775 | 2671 A  | 1.031  | 40.63 | 0.85207 | 11610 |
| Slc30a8       | A_52_P529022 | NM_172816    | solute carrier family 30 (zinc transporter),  | -2.347 | 1.44  | 0.04794 | 284 M   | -1.866 | 0     | 0.00376 | 4     |
| Ccnd1         | A_51_P262766 | NM_007631    | cyclin D1                                     | -2.353 | 0.55  | 0.02517 | 148 P   | -1.131 | 5.75  | 0.07486 | 2527  |
| Igf2          | A_51_P516833 | NM_010514    | insulin-like growth factor 2                  | -2.353 | 4.65  | 0.08306 | 583 P   | 1.088  | 11.33 | 0.13109 | 3688  |
| Nupr1         | A_51_P519251 | NM_019738    | nuclear protein 1                             | -2.353 | 3.82  | 0.07471 | 491 M   | -1.275 | 1.18  | 0.04505 | 1683  |
| Rnase4        | A_51_P237383 | NM_021472    | ribonuclease, RNase A family 4                | -2.353 | 2.87  | 0.05858 | 355 P   | -1.762 | 1.18  | 0.13679 | 3786  |
| Phf13         | A_52_P632397 | NM_172705    | PHD finger protein 13                         | -2.387 | 6.57  | 0.11253 | 864 P   | -1.079 | 19.02 | 0.12129 | 3527  |
| Gcgr          | A_51_P211403 | NM_008101    | glucagon receptor                             | -2.404 | 3.82  | 0.07147 | 479 P   | -1.05  | 44.4  | 0.5786  | 9250  |
| Car2          | A_51_P455647 | NM_009801    | carbonic anhydrase 2                          | -2.41  | 57.76 | 0.71369 | 19162 P | 1.183  | 6.98  | 0.14811 | 4007  |
| Mesp1         | A_51_P341725 | NM_008588    | mesoderm posterior 1                          | -2.427 | 4.65  | 0.0868  | 610 P   | 1.065  | 16.2  | 0.17692 | 4512  |
| Reg2          | A_51_P333549 | NM_009043    | regenerating islet-derived 2                  | -2.445 | 20.94 | 0.32751 | 3785 M  | -1.225 | 11.33 | 0.32279 | 6591  |
| Gsta2         | A_52_P458682 | NM_008182    | glutathione S-transferase, alpha 2 (Yc2)      | -2.451 | 53.87 | 0.68523 | 17672 P | 1.16   | 8.32  | 0.13742 | 3799  |
| Hs6st2        | A_52_P599317 | NM_001077202 | heparan sulfate 6-O-sulfotransferase 2        | -2.451 | 10.33 | 0.17552 | 1581 P  | 1.12   | 13.58 | 0.27928 | 6081  |
| Lef1          | A_51_P501145 | AK083328     | lymphoid enhancer binding factor 1            | -2.463 | 25.79 | 0.36978 | 5616 P  | 1.042  | 40.63 | 0.88222 | 11881 |
| Nck2          | A_52_P372925 | NM_010879    | non-catalytic region of tyrosine kinase ad    | -2.481 | 1.44  | 0.03468 | 216 P   | -1.052 | 38.4  | 0.2725  | 5990  |
| Serpina3g     | A_51_P326191 | NM_009251    | serine (or cysteine) peptidase inhibitor, cl  | -2.494 | 4.11  | 0.07997 | 557 P   | 1.152  | 6.98  | 0.07543 | 2550  |
| Deaf1         | A_52_P545575 | AK080564     | deformed epidermal autoregulatory facto       | -2.519 | 0.55  | 0.02244 | 140 P   | 1.006  | 42.43 | 0.905   | 12147 |
| Reln          | A_51_P365369 | NM_011261    | reelin                                        | -2.525 | 18.5  | 0.28891 | 3607 P  | 1.087  | 11.33 | 0.12036 | 3500  |
| Sfrp5         | A_51_P476169 | NM_018780    | secreted frizzled-related sequence protei     | -2.591 | 2.4   | 0.05352 | 318 P   | 1.062  | 19.02 | 0.2463  | 5595  |
| Trp53inp2     | A_51_P228354 | NM_178111    | transformation related protein 53 induci      | -2.604 | 5.15  | 0.12136 | 861 M   | -1.529 | 0.51  | 0.01123 | 430   |
| Gcnt1         | A_52_P227137 | NM_010265    | glucosaminyl (N-acetyl) transferase 1, cor    | -2.611 | 7.45  | 0.14471 | 1194 M  | -1.03  | 45.68 | 0.50952 | 8669  |
| Iapp          | A_51_P119841 | NM_010491    | islet amyloid polypeptide                     | -2.632 | 10.33 | 0.19797 | 1674 M  | -1.236 | 0.75  | 0.03814 | 1293  |
| Rac2          | A_51_P121891 | NM_009008    | RAS-related C3 botulinum substrate 2          | -2.646 | 16.01 | 0.26214 | 3020 P  | -1.342 | 0.51  | 0.00584 | 58    |
| Sema4g        | A_51_P331003 | NM_011976    | sema domain, immunoglobulin domain (I         | -2.646 | 7.45  | 0.14396 | 1171 P  | 1.169  | 3.46  | 0.0268  | 1095  |
| Ccl5          | A_51_P485312 | NM_013653    | chemokine (C-C motif) ligand 5                | -2.674 | 38.68 | 0.51432 | 10097 P | 1.027  | 33.49 | 0.56342 | 9144  |
| Anpep         | A_51_P231184 | NM_008486    | alanyl (membrane) aminopeptidase              | -2.681 | 1.21  | 0.02577 | 154 P   | 1.12   | 6.98  | 0.05397 | 1975  |
| Abcb4         | A_51_P249118 | NM_008830    | ATP-binding cassette, sub-family B (MDR/      | -2.688 | 3.82  | 0.07147 | 482 P   | 1.001  | 42.43 | 0.99013 | 12987 |
| Elmo1         | A_52_P613688 | NM_198093    | engulfment and cell motility 1, ced-12 ho     | -2.688 | 1.44  | 0.03586 | 225 P   | -1.019 | 48.7  | 0.67396 | 10088 |

|               |               |           |                                                           |         |       |         |         |        |       |         |       |
|---------------|---------------|-----------|-----------------------------------------------------------|---------|-------|---------|---------|--------|-------|---------|-------|
| Prc1          | A_51_P366931  | NM_145150 | protein regulator of cytokinesis 1                        | -2.695  | 4.65  | 0.0915  | 655 P   | 1.015  | 40.63 | 0.74339 | 10733 |
| Hoxd1         | A_51_P305217  | NM_010467 | homeo box D1                                              | -2.747  |       | 0.29225 | 2088 A  | 1.103  | 11.33 | 0.15775 | 4175  |
| Ppy           | A_52_P460791  | NM_008918 | pancreatic polypeptide                                    | -2.778  | 13.61 | 0.25347 | 2418 M  | -1.291 | 5.75  | 0.23847 | 5463  |
| Chga          | A_51_P358316  | NM_007693 | chromogranin A                                            | -2.793  | 20.94 | 0.34879 | 4253 M  | -1.241 | 2.53  | 0.09521 | 3004  |
| Plac8         | A_51_P515883  | NM_139198 | placenta-specific 8                                       | -2.809  | 53.87 | 0.68305 | 17546 P | -1.09  | 30.75 | 0.31508 | 6523  |
| Pi9r          | A_51_P239737  | NM_011082 | polymeric immunoglobulin receptor                         | -2.899  | 45.92 | 0.60436 | 13648 P | -1.011 | 49.48 | 0.82193 | 11379 |
| Pgf           | A_51_P318381  | NM_008827 | placental growth factor                                   | -2.95   | 1.48  | 0.04214 | 257 P   | -1.003 | 49.48 | 0.97124 | 12758 |
| Nkx2-2        | A_51_P197718  | NM_010919 | NK2 transcription factor related, locus 2 (               | -2.967  | 2.4   | 0.074   | 472 M   | -1.162 | 2.53  | 0.04464 | 1662  |
| Myb           | A_51_P375543  | NM_010848 | myeloblastosis oncogene                                   | -3.049  | 38.68 | 0.52957 | 10730 P | -1.056 | 42.43 | 0.47031 | 8200  |
| Fxyd6         | A_51_P490247  | NM_022004 | FXYP domain-containing ion transport reg                  | -3.195  | 1.44  | 0.03494 | 217 P   | -1.487 | 0.51  | 0.01938 | 817   |
| Muc2          | A_51_P128320  | BC034197  | mucin 2                                                   | -3.215  | 31.88 | 0.37219 | 5462 P  | 1.083  | 11.33 | 0.12216 | 3546  |
| Rrm2          | A_51_P110689  | NM_009104 | ribonucleotide reductase M2                               | -3.215  | 4.65  | 0.10238 | 774 P   | -1.442 | 0.51  | 0.03335 | 1300  |
| Barx2         | A_52_P533817  | AK009185  | BarH-like homeobox 2                                      | -3.279  | 7.45  | 0.16388 | 1412 P  | 1.062  | 19.02 | 0.28627 | 6177  |
| Cpb2          | A_51_P262701  | NM_019775 | carboxypeptidase B2 (plasma)                              | -3.413  | 3.82  | 0.0794  | 537 P   | 1.047  | 28.13 | 0.49171 | 8460  |
| Ambp          | A_51_P145785  | NM_007443 | alpha 1 microglobulin/bikunin                             | -3.436  | 1.21  | 0.02713 | 161 P   | -1.088 | 33.49 | 0.36478 | 7090  |
| Xlkd1         | A_52_P686785  | NM_053247 | extra cellular link domain-containing 1                   | -3.448  | 0     | 0.01582 | 81 P    | -1.077 | 22.1  | 0.13896 | 3820  |
| H2-Eb1        | A_51_P393226  | X52641    | histocompatibility 2, class II antigen E bet              | -3.831  | 31.88 | 0.45823 | 8144 P  | 1.053  | 25.31 | 0.35657 | 6974  |
| Wnt4          | A_51_P130475  | NM_009523 | wingless-related MMTV integration site 4                  | -3.831  | 0     | 0.01412 | 66 P    | -1.105 | 6.98  | 0.06127 | 2175  |
| Uox           | A_51_P205385  | NM_009474 | urate oxidase                                             | -3.861  | 0     | 0.01385 | 63 P    | -1.062 | 33.49 | 0.246   | 5583  |
| 1810009J06Rik | A_51_P502075  | NM_023707 | RIKEN cDNA 1810009J06 gene                                | -3.906  | 9.39  | 0.18765 | 1774 P  | 1.336  | 3.01  | 0.08717 | 2826  |
| Bmp1          | A_51_P488646  | NM_009755 | bone morphogenetic protein 1                              | -3.906  | 3.78  | 0.07931 | 536 P   | -1.092 | 19.02 | 0.17385 | 4449  |
| Cd79b         | A_51_P342652  | NM_008339 | CD79B antigen                                             | -3.953  | 18.5  | 0.32851 | 4607 P  | 1.008  | 42.43 | 0.91867 | 12262 |
| Six4          | A_52_P420340  | NM_011382 | sine oculis-related homeobox 4 homolog                    | -4.405  | 0     | 0.01819 | 117 P   | -1.218 | 1.18  | 0.02468 | 1018  |
| Sez6l         | A_51_P201747  | BC065117  | seizure related 6 homolog like                            | -4.525  | 4.11  | 0.11253 | 802 M   | -2.055 | 0     | 0.00731 | 244   |
| Dusp4         | A_51_P347333  | AK012530  | dual specificity phosphatase 4                            | -4.566  | 0.77  | 0.02771 | 163 P   | 1.013  | 42.43 | 0.82749 | 11436 |
| Tnfrsf11b     | A_52_P106620  | NM_008764 | tumor necrosis factor receptor superfam                   | -4.566  | 0     | 0.01582 | 80 P    | -1.724 | 0     | 0.00584 | 6     |
| Igh-6         | A_52_P358360  | AK088666  | immunoglobulin heavy chain 6 (heavy cha                   | -4.587  | 12.21 | 0.26183 | 3016 P  | -1.114 | 25.31 | 0.30779 | 6416  |
| Fxyd3         | A_52_P377791  | NM_008557 | FXYP domain-containing ion transport reg                  | -4.695  | 1.58  | 0.05304 | 310 P   | -1.169 | 2.04  | 0.03941 | 1496  |
| Ddc           | A_52_P63905   | NM_016672 | dopa decarboxylase                                        | -5.102  | 0     | 0.01538 | 71 P    | -1.9   | 0     | 0.00584 | 78    |
|               | A_51_P196590  | NM_008212 | hydroxyacyl-Coenzyme A dehydrogenase                      | -5.435  | 0     | 0.00773 | 27 P    | -2.44  | 0     | 0.00584 | 79    |
| Klf5          | A_52_P54463   | BC006646  | Kruppel-like factor 5                                     | -5.263  | 0     | 0.00773 | 28 P    | 1.138  | 6.98  | 0.07017 | 2399  |
| 2210415F13Rik | A_52_P670766  | NM_027339 | RIKEN cDNA 2210415F13 gene                                | -5.618  | 35.45 | 0.49841 | 9580 P  | -1.015 | 49.48 | 0.81862 | 11345 |
| Loxl2         | A_52_P480351  | XM_985144 | lysyl oxidase-like 2                                      | -5.65   | 0     | 0.00636 | 19 P    | -1.022 | 47.92 | 0.6291  | 9706  |
| Ttr           | A_51_P194149  | NM_013697 | transthyretin                                             | -5.747  | 0     | 0.01677 | 98 P    | -1.122 | 19.02 | 0.24091 | 5508  |
| Foxa2         | A_51_P222773  | NM_010446 | forkhead box A2                                           | -6.289  | 4.11  | 0.10445 | 805 P   | -1.385 | 0.51  | 0.00584 | 31    |
| Sell          | A_51_P236234  | NM_011346 | selectin, lymphocyte                                      | -6.757  | 12.21 | 0.14458 | 1162 P  | -1.048 | 40.63 | 0.32191 | 6584  |
| Igl-V1        | A_52_P829408  | AK008145  | immunoglobulin lambda chain, variable 1                   | -6.944  | 13.61 | 0.19756 | 1633 M  | -1.216 | 1.18  | 0.0289  | 1163  |
| Retnlb        | A_51_P428360  | NM_023881 | resistin like beta                                        | -9.346  | 8.15  | 0.19974 | 1945 P  | 1.103  | 11.33 | 0.14486 | 3944  |
| Reg4          | A_52_P257758  | NM_026328 | regenerating islet-derived family, membe                  | -15.152 | 12.21 | 0.15261 | 1093 P  | 1.067  | 13.58 | 0.14723 | 3987  |
| Slc14a2       | A_52_P198885  | NM_207651 | solute carrier family 14 (urea transporter)               | -15.385 | 0     | 0.00616 | 14 P    | -1.41  | 1.18  | 0.07798 | 2602  |
| Insr          | A_51_P233546  | NM_011832 | insulin receptor-related receptor                         | -29.412 | 0     | 0.00616 | 1 P     | -1.231 | 0.92  | 0.01749 | 745   |
| 4930556A17Rik | A_51_P486593  | XM_979591 | RIKEN cDNA 4930556A17 gene                                |         |       |         | A       | 1.013  | 42.43 | 0.81957 | 11352 |
| A630012P03Rik | A_52_P74381   | AK085028  | RIKEN cDNA A630012P03 gene                                |         |       |         | A       | 1.045  | 25.31 | 0.32115 | 6577  |
| Barx1         | A_51_P151493  | NM_007526 | BarH-like homeobox 1                                      |         |       |         | A       | -1.132 | 22.1  | 0.30954 | 6437  |
| BC006965      | A_51_P288719  | BC006965  | cDNA sequence BC006965                                    |         |       |         | A       | -1.018 | 48.39 | 0.6582  | 9955  |
| Bmp8b         | A_51_P411926  | NM_007559 | bone morphogenetic protein 8b                             |         |       |         | A       | 1.06   | 22.1  | 0.30567 | 6390  |
| D10Ert755e    | A_52_P494580  | AK080282  | DNA segment, Chr 10, ERATO Doi 755, expressed             |         |       |         | A       | 1.025  | 36.07 | 0.59776 | 9433  |
| D230019N24Rik | A_51_P442193  | AK051927  | RIKEN cDNA D230019N24 gene                                |         |       |         | A       | -1.091 | 9.71  | 0.0811  | 2685  |
| D830007B15Rik | A_52_P33202   | AK077061  | RIKEN cDNA D830007B15 gene                                |         |       |         | A       | 1.011  | 42.43 | 0.80547 | 11223 |
| Dmgdh         | A_51_P273679  | NM_028772 | dimethylglycine dehydrogenase precursor                   |         |       |         | A       | 1.005  | 42.43 | 0.92557 | 12351 |
| Ela2          | A_51_P144551  | NM_015779 | elastase 2, neutrophil                                    |         |       |         | A       | 1.01   | 42.43 | 0.9443  | 12524 |
| F830002L21Rik | A_52_P1028835 | AK089577  | RIKEN cDNA F830002L21 gene                                |         |       |         | A       | -1.002 | 49.48 | 0.96935 | 12740 |
| Hand1         | A_51_P342549  | NM_008213 | heart and neural crest derivatives expressed transcript 1 |         |       |         | A       | 1.174  | 2.53  | 0.01645 | 703   |

|           |              |           |                                                                    |   |        |       |         |       |
|-----------|--------------|-----------|--------------------------------------------------------------------|---|--------|-------|---------|-------|
| Hoxc4     | A_51_P183481 | NM_013553 | homeo box C4                                                       | A | 1.039  | 30.75 | 0.46523 | 8160  |
| Hoxd11    | A_51_P112319 | NM_008273 | homeo box D11                                                      | A | 1.03   | 33.49 | 0.55544 | 9070  |
| Mds1      | A_51_P437349 | NM_021442 | myelodysplasia syndrome 1 homolog (human)                          | A | 1.083  | 11.33 | 0.1367  | 3783  |
| Neurod6   | A_51_P394997 | NM_009717 | neurogenic differentiation 6                                       | A | -1.311 | 0.51  | 0.00654 | 190   |
| Nkx2-5    | A_51_P173285 | NM_008700 | NK2 transcription factor related, locus 5 ( <i>Drosophila</i> )    | A | 1.03   | 30.75 | 0.49171 | 8467  |
| Pcdhb9    | A_51_P483878 | NM_053134 | protocadherin beta 9                                               | A | -1.312 | 0.51  | 0.00584 | 89    |
| Pitx1     | A_52_P522255 | NM_011097 | paired-like homeodomain transcription factor 1                     | A | 1.009  | 42.43 | 0.87351 | 11793 |
| Serpina3a | A_51_P125779 | BC063325  | serine (or cysteine) peptidase inhibitor, clade A, member 3A       | A | -1.027 | 46.85 | 0.60921 | 9515  |
| Trpm8     | A_51_P156334 | NM_134252 | transient receptor potential cation channel, subfamily M, member 8 | A | -1.197 | 4.63  | 0.13845 | 3808  |
| Ucp3      | A_52_P380379 | NM_009464 | uncoupling protein 3 (mitochondrial, proton carrier)               | A | 1.046  | 25.31 | 0.304   | 6371  |
| Upk1b     | A_51_P113195 | NM_178924 | uroplakin 1B                                                       | A | -1.199 | 1.18  | 0.02003 | 853   |
